# Supplementary material for: Version 8 IMK/IAA MIPAS measurements of CFC-11, CFC-12, and HCFC-22
Source: Copernicus journal article supplement (doi:10.5194/amt-17-1759-2024), 2024-03-27
Supplement: Supplementary file 2 [file amt-17-1759-2024-supplement.zip]

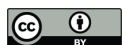

*Supplement of*

## **Version 8 IMK/IAA MIPAS measurements of CFC-11, CFC-12, and HCFC-22**

**Gabriele P. Stiller et al.**

*Correspondence to:* Gabriele P. Stiller ([gabriele.stiller@kit.edu](mailto:gabriele.stiller@kit.edu))

- [amt-17-1759-2024-supplement-title-page.pdf](#)
- [S1.pdf](#)
- [S2.pdf](#)
- [S3.pdf](#)

The copyright of individual parts of the supplement might differ from the article licence.
