# Supplementary material for: Version 8 IMK/IAA MIPAS measurements of CFC-11, CFC-12, and HCFC-22
Source: Copernicus journal article supplement (doi:10.5194/amt-17-1759-2024), 2024-03-27
Supplement: Supplementary file 3 [file amt-17-1759-2024-supplement.zip]

This document serves as reference for the definitions of the representative atmospheres used for the calculation of HCFC-22 error budgets, as listed in Tab. S1, and as collection of the respective error budgets for FR data (2002-2004), which are listed in tables S2–S35 and depicted in figures S1–S34, and the respective error budgets for RR data (2005-2012) in the MIPAS nominal measurement mode, which are listed in tables S36–S69 and depicted in figures S35–S68, and in the MIPAS middle atmosphere measurement mode, which are listed in tables S70–S103 and depicted in figures S69–S102.

The errors are presented as absolute errors in pptv.

**Table S1.** Labels and definitions of the representative atmospheric conditions which were used to calculate the error budget for FR and RR nominal measurement mode data ( $\beta_{\max} = 95^\circ$ ) and RR middle atmosphere measurement mode data ( $\beta_{\max} = 98^\circ$ ).

| representative atmosphere label   | month(s) used | latitude range                        | solar zenith angle range |
|-----------------------------------|---------------|---------------------------------------|--------------------------|
| Northern polar winter day         | Jan, Feb      | $65^\circ\text{N} - 90^\circ\text{N}$ | $< 90^\circ$             |
| Northern polar winter night       | Jan, Feb      | $65^\circ\text{N} - 90^\circ\text{N}$ | $> \beta_{\max}$         |
| Northern polar spring day         | Apr           | $65^\circ\text{N} - 90^\circ\text{N}$ | $< 90^\circ$             |
| Northern polar spring night       | Apr           | $65^\circ\text{N} - 90^\circ\text{N}$ | $> \beta_{\max}$         |
| Northern polar summer day         | Jul, Aug      | $65^\circ\text{N} - 90^\circ\text{N}$ | $< 90^\circ$             |
| Northern polar summer night       | Jul, Aug      | $65^\circ\text{N} - 90^\circ\text{N}$ | $> \beta_{\max}$         |
| Northern polar autumn day         | Oct           | $65^\circ\text{N} - 90^\circ\text{N}$ | $< 90^\circ$             |
| Northern polar autumn night       | Oct           | $65^\circ\text{N} - 90^\circ\text{N}$ | $> \beta_{\max}$         |
| Northern midlatitude winter day   | Jan, Feb      | $40^\circ\text{N} - 60^\circ\text{N}$ | $< 90^\circ$             |
| Northern midlatitude winter night | Jan, Feb      | $40^\circ\text{N} - 60^\circ\text{N}$ | $> \beta_{\max}$         |
| Northern midlatitude spring day   | Apr           | $40^\circ\text{N} - 60^\circ\text{N}$ | $< 90^\circ$             |
| Northern midlatitude spring night | Apr           | $40^\circ\text{N} - 60^\circ\text{N}$ | $> \beta_{\max}$         |
| Northern midlatitude summer day   | Jul, Aug      | $40^\circ\text{N} - 60^\circ\text{N}$ | $< 90^\circ$             |
| Northern midlatitude summer night | Jul, Aug      | $40^\circ\text{N} - 60^\circ\text{N}$ | $> \beta_{\max}$         |
| Northern midlatitude autumn day   | Oct           | $40^\circ\text{N} - 60^\circ\text{N}$ | $< 90^\circ$             |
| Northern midlatitude autumn night | Oct           | $40^\circ\text{N} - 60^\circ\text{N}$ | $> \beta_{\max}$         |
| Tropics day                       | Apr           | $20^\circ\text{S} - 20^\circ\text{N}$ | $< 90^\circ$             |
| Tropics night                     | Apr           | $20^\circ\text{S} - 20^\circ\text{N}$ | $> \beta_{\max}$         |
| Southern midlatitude winter day   | Jul, Aug      | $40^\circ\text{S} - 60^\circ\text{S}$ | $< 90^\circ$             |
| Southern midlatitude winter night | Jul, Aug      | $40^\circ\text{S} - 60^\circ\text{S}$ | $> \beta_{\max}$         |
| Southern midlatitude spring day   | Oct           | $40^\circ\text{S} - 60^\circ\text{S}$ | $< 90^\circ$             |
| Southern midlatitude spring night | Oct           | $40^\circ\text{S} - 60^\circ\text{S}$ | $> \beta_{\max}$         |
| Southern midlatitude summer day   | Jan, Feb      | $40^\circ\text{S} - 60^\circ\text{S}$ | $< 90^\circ$             |
| Southern midlatitude summer night | Jan, Feb      | $40^\circ\text{S} - 60^\circ\text{S}$ | $> \beta_{\max}$         |
| Southern midlatitude autumn day   | Apr           | $40^\circ\text{S} - 60^\circ\text{S}$ | $< 90^\circ$             |
| Southern midlatitude autumn night | Apr           | $40^\circ\text{S} - 60^\circ\text{S}$ | $> \beta_{\max}$         |
| Southern polar winter day         | Jul, Aug      | $65^\circ\text{S} - 90^\circ\text{S}$ | $< 90^\circ$             |
| Southern polar winter night       | Jul, Aug      | $65^\circ\text{S} - 90^\circ\text{S}$ | $> \beta_{\max}$         |
| Southern polar spring day         | Oct           | $65^\circ\text{S} - 90^\circ\text{S}$ | $< 90^\circ$             |
| Southern polar spring night       | Oct           | $65^\circ\text{S} - 90^\circ\text{S}$ | $> \beta_{\max}$         |
| Southern polar summer day         | Jan, Feb      | $65^\circ\text{S} - 90^\circ\text{S}$ | $< 90^\circ$             |
| Southern polar summer night       | Jan, Feb      | $65^\circ\text{S} - 90^\circ\text{S}$ | $> \beta_{\max}$         |
| Southern polar autumn day         | Apr           | $65^\circ\text{S} - 90^\circ\text{S}$ | $< 90^\circ$             |
| Southern polar autumn night       | Apr           | $65^\circ\text{S} - 90^\circ\text{S}$ | $> \beta_{\max}$         |

**Table S2.** HCFC-22 error budget for Northern polar winter day. All uncertainties are  $1\sigma$ .

| altitude<br>(km) | mean target<br>(pptv) | interf<br>(pptv) | ILS<br>(pptv) | shift<br>(pptv) | offset<br>(pptv) | gain<br>(pptv) | spectro<br>(pptv) | T+LOS<br>(pptv) | noise<br>(pptv) | random<br>(pptv) | syst<br>(pptv) | total<br>(pptv) |
|------------------|-----------------------|------------------|---------------|-----------------|------------------|----------------|-------------------|-----------------|-----------------|------------------|----------------|-----------------|
| 5                | 168.50                | 1.60             | 0.65          | 0.17            | 2.84             | 1.15           | 6.99              | 1.43            | 5.34            | 7.25             | 6.27           | 9.59            |
| 8                | 153.50                | 0.77             | 0.58          | 0.10            | 2.04             | 1.69           | 5.36              | 1.33            | 4.55            | 5.99             | 4.82           | 7.69            |
| 11               | 143.53                | 0.42             | 0.54          | 0.07            | 1.26             | 1.72           | 5.67              | 1.16            | 4.08            | 4.55             | 5.88           | 7.43            |
| 14               | 127.11                | 0.37             | 2.15          | 0.19            | 1.07             | 1.74           | 7.37              | 1.34            | 4.93            | 5.49             | 7.70           | 9.45            |
| 17               | 104.50                | 0.31             | 2.71          | 0.30            | 0.99             | 1.36           | 6.55              | 1.10            | 5.96            | 6.32             | 7.07           | 9.48            |
| 20               | 85.63                 | 0.25             | 1.80          | 0.39            | 0.97             | 1.02           | 5.02              | 0.68            | 6.99            | 7.20             | 5.30           | 8.94            |
| 23               | 75.88                 | 0.25             | 0.95          | 0.60            | 1.07             | 0.86           | 3.85              | 0.39            | 7.93            | 8.12             | 3.90           | 9.01            |
| 26               | 72.79                 | 0.30             | 0.82          | 0.90            | 1.98             | 0.85           | 3.47              | 0.30            | 8.70            | 9.07             | 3.42           | 9.70            |
| 29               | 71.06                 | 0.37             | 0.82          | 1.25            | 3.91             | 0.88           | 3.26              | 0.30            | 9.50            | 10.45            | 3.19           | 10.92           |
| 32               | 69.03                 | 0.48             | 0.79          | 1.60            | 6.41             | 0.96           | 3.00              | 0.34            | 11.00           | 12.91            | 2.99           | 13.25           |
| 35               | 66.07                 | 0.59             | 0.79          | 1.88            | 8.71             | 1.06           | 2.74              | 0.38            | 12.96           | 15.79            | 2.81           | 16.04           |
| 38               | 63.32                 | 0.66             | 0.83          | 2.07            | 10.48            | 1.14           | 2.54              | 0.41            | 14.69           | 18.22            | 2.69           | 18.42           |
| 41               | 60.55                 | 0.71             | 0.90          | 2.23            | 11.55            | 1.20           | 2.38              | 0.44            | 15.72           | 19.68            | 2.59           | 19.85           |

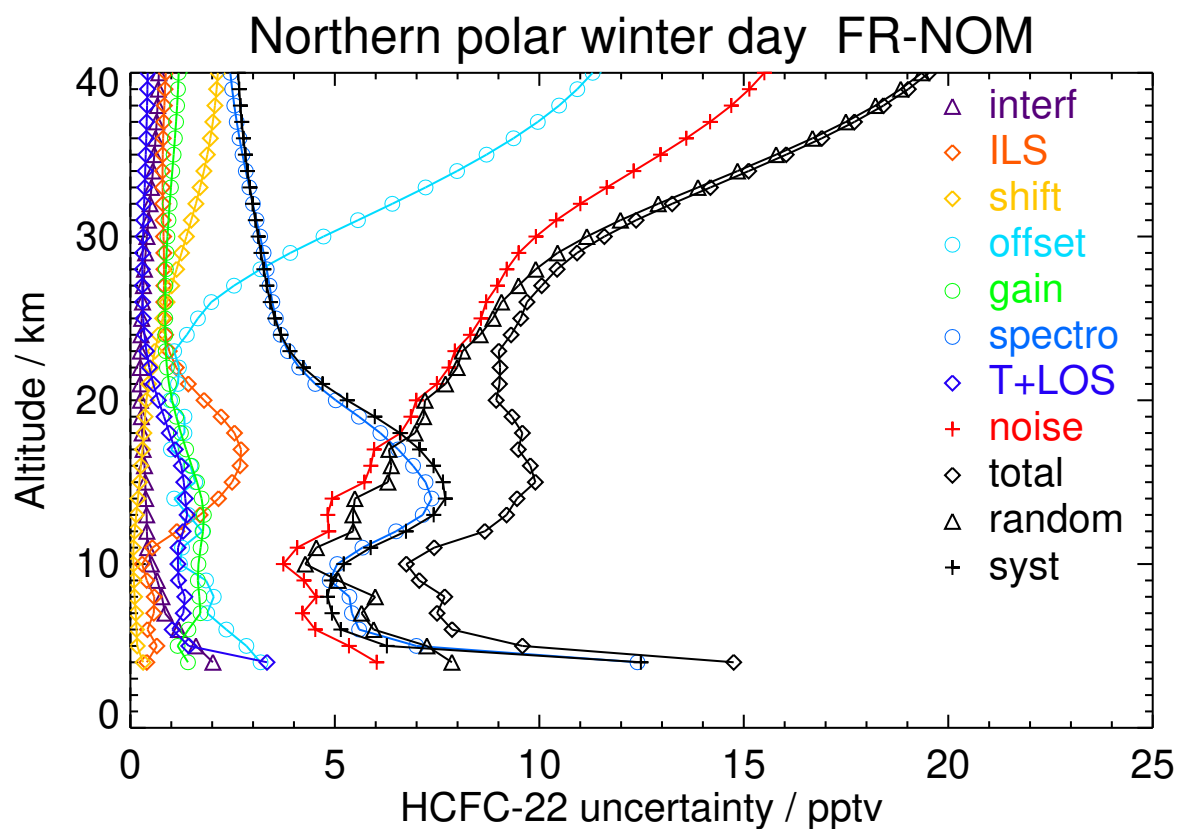

**Figure S1.** V8H\_F-22\_61 Northern polar winter day

**Table S3.** HCFC-22 error budget for Northern polar winter night. All uncertainties are  $1\sigma$ .

| altitude<br>(km) | mean target<br>(pptv) | interf<br>(pptv) | ILS<br>(pptv) | shift<br>(pptv) | offset<br>(pptv) | gain<br>(pptv) | spectro<br>(pptv) | T+LOS<br>(pptv) | noise<br>(pptv) | random<br>(pptv) | syst<br>(pptv) | total<br>(pptv) |
|------------------|-----------------------|------------------|---------------|-----------------|------------------|----------------|-------------------|-----------------|-----------------|------------------|----------------|-----------------|
| 5                | 162.61                | 1.64             | 0.85          | 0.20            | 2.90             | 0.63           | 8.26              | 1.82            | 5.37            | 7.02             | 7.96           | 10.61           |
| 8                | 156.16                | 0.38             | 0.25          | 0.14            | 1.03             | 2.39           | 5.44              | 1.56            | 3.18            | 3.96             | 5.78           | 7.01            |
| 11               | 143.25                | 0.46             | 0.65          | 0.08            | 0.79             | 1.85           | 5.92              | 1.09            | 3.87            | 4.39             | 6.05           | 7.48            |
| 14               | 123.65                | 0.38             | 2.27          | 0.19            | 0.89             | 1.74           | 7.78              | 1.48            | 4.94            | 5.44             | 8.15           | 9.80            |
| 17               | 100.79                | 0.32             | 2.66          | 0.23            | 1.00             | 1.23           | 6.46              | 1.14            | 6.08            | 6.47             | 6.93           | 9.48            |
| 20               | 82.54                 | 0.25             | 1.91          | 0.34            | 1.08             | 0.98           | 5.13              | 0.77            | 7.20            | 7.48             | 5.37           | 9.21            |
| 23               | 71.27                 | 0.26             | 1.10          | 0.59            | 1.25             | 0.79           | 3.92              | 0.48            | 8.10            | 8.36             | 3.90           | 9.22            |
| 26               | 68.49                 | 0.31             | 0.96          | 0.95            | 1.99             | 0.78           | 3.26              | 0.37            | 8.83            | 9.19             | 3.27           | 9.76            |
| 29               | 64.15                 | 0.38             | 0.99          | 1.38            | 3.71             | 0.82           | 2.89              | 0.35            | 9.44            | 10.32            | 2.93           | 10.73           |
| 32               | 58.07                 | 0.51             | 0.97          | 1.81            | 6.07             | 0.91           | 2.60              | 0.40            | 10.62           | 12.45            | 2.62           | 12.73           |
| 35               | 52.91                 | 0.63             | 0.93          | 2.13            | 8.38             | 1.01           | 2.34              | 0.44            | 12.40           | 15.19            | 2.38           | 15.38           |
| 38               | 48.96                 | 0.72             | 0.95          | 2.34            | 10.25            | 1.10           | 2.13              | 0.48            | 14.17           | 17.71            | 2.24           | 17.85           |
| 41               | 47.00                 | 0.77             | 0.99          | 2.46            | 11.43            | 1.17           | 2.02              | 0.50            | 15.34           | 19.35            | 2.19           | 19.48           |

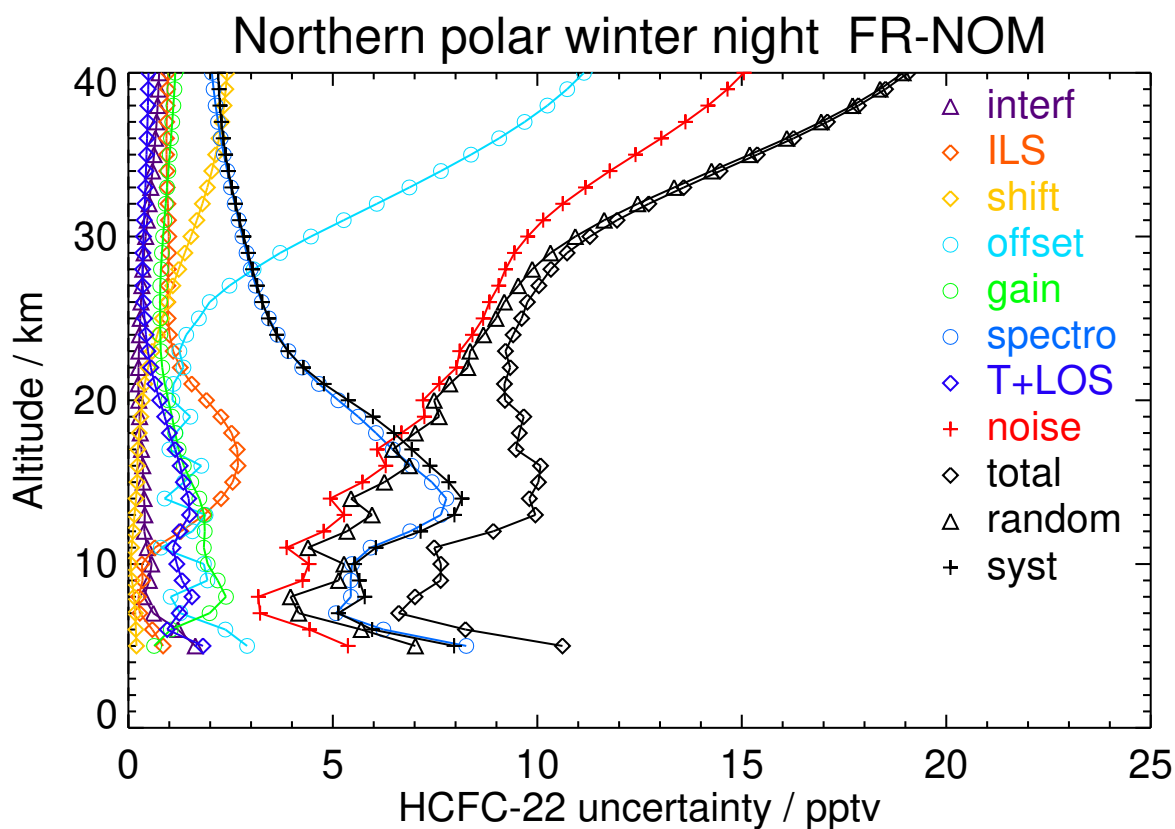

**Figure S2.** V8H\_F-22\_61 Northern polar winter night

**Table S4.** HCFC-22 error budget for Northern polar spring day. All uncertainties are  $1\sigma$ .

| altitude<br>(km) | mean target<br>(pptv) | interf<br>(pptv) | ILS<br>(pptv) | shift<br>(pptv) | offset<br>(pptv) | gain<br>(pptv) | spectro<br>(pptv) | T+LOS<br>(pptv) | noise<br>(pptv) | random<br>(pptv) | syst<br>(pptv) | total<br>(pptv) |
|------------------|-----------------------|------------------|---------------|-----------------|------------------|----------------|-------------------|-----------------|-----------------|------------------|----------------|-----------------|
| 8                | 151.76                | 0.82             | 0.65          | 0.08            | 2.00             | 1.23           | 5.33              | 0.98            | 3.97            | 5.21             | 4.97           | 7.20            |
| 11               | 139.77                | 0.41             | 0.39          | 0.05            | 2.04             | 1.97           | 6.20              | 1.30            | 4.43            | 5.13             | 6.46           | 8.25            |
| 14               | 115.23                | 0.34             | 2.13          | 0.13            | 1.92             | 1.72           | 7.25              | 1.31            | 5.19            | 5.85             | 7.64           | 9.62            |
| 17               | 88.52                 | 0.29             | 2.67          | 0.23            | 1.66             | 1.11           | 6.00              | 0.96            | 5.95            | 6.41             | 6.52           | 9.14            |
| 20               | 72.79                 | 0.24             | 1.59          | 0.33            | 1.41             | 0.92           | 3.81              | 0.49            | 6.71            | 7.02             | 3.99           | 8.08            |
| 23               | 73.04                 | 0.23             | 0.93          | 0.52            | 1.14             | 0.92           | 3.14              | 0.29            | 7.44            | 7.68             | 3.10           | 8.28            |
| 26               | 74.28                 | 0.29             | 0.92          | 0.81            | 1.38             | 0.93           | 3.17              | 0.27            | 8.20            | 8.46             | 3.19           | 9.04            |
| 29               | 74.50                 | 0.35             | 0.94          | 1.24            | 2.53             | 0.92           | 3.15              | 0.30            | 8.70            | 9.23             | 3.23           | 9.78            |
| 32               | 69.45                 | 0.44             | 0.91          | 1.77            | 4.60             | 1.00           | 2.93              | 0.35            | 9.31            | 10.59            | 3.08           | 11.03           |
| 35               | 62.81                 | 0.58             | 0.91          | 2.27            | 6.89             | 1.16           | 2.62              | 0.43            | 10.60           | 12.89            | 2.88           | 13.21           |
| 38               | 56.52                 | 0.73             | 0.99          | 2.68            | 8.94             | 1.31           | 2.33              | 0.52            | 12.35           | 15.53            | 2.73           | 15.76           |
| 41               | 51.83                 | 0.83             | 1.12          | 2.95            | 10.45            | 1.42           | 2.12              | 0.58            | 13.82           | 17.62            | 2.67           | 17.82           |

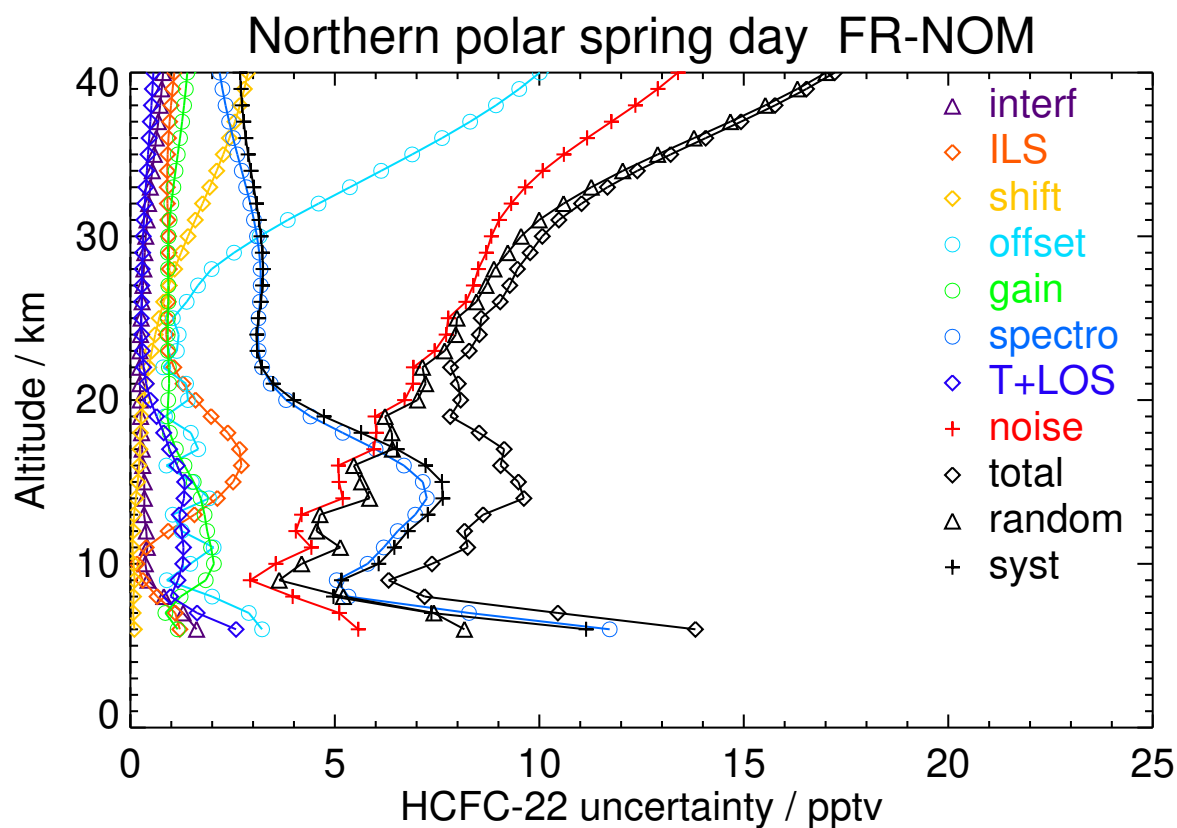

**Figure S3.** V8H\_F-22\_61 Northern polar spring day

**Table S5.** HCFC-22 error budget for Northern polar spring night. All uncertainties are  $1\sigma$ .

| altitude<br>(km) | mean target<br>(pptv) | interf<br>(pptv) | ILS<br>(pptv) | shift<br>(pptv) | offset<br>(pptv) | gain<br>(pptv) | spectro<br>(pptv) | T+LOS<br>(pptv) | noise<br>(pptv) | random<br>(pptv) | syst<br>(pptv) | total<br>(pptv) |
|------------------|-----------------------|------------------|---------------|-----------------|------------------|----------------|-------------------|-----------------|-----------------|------------------|----------------|-----------------|
| 8                | 151.54                | 0.89             | 0.70          | 0.09            | 2.23             | 1.24           | 5.18              | 0.99            | 4.30            | 5.56             | 4.81           | 7.35            |
| 11               | 136.46                | 0.40             | 0.63          | 0.05            | 2.03             | 1.87           | 6.19              | 1.27            | 4.43            | 5.18             | 6.40           | 8.23            |
| 14               | 115.47                | 0.35             | 2.22          | 0.16            | 1.87             | 1.58           | 7.17              | 1.26            | 5.22            | 5.85             | 7.55           | 9.55            |
| 17               | 91.60                 | 0.29             | 2.61          | 0.24            | 1.59             | 1.13           | 6.02              | 0.93            | 5.99            | 6.50             | 6.43           | 9.14            |
| 20               | 78.16                 | 0.23             | 1.46          | 0.33            | 1.30             | 0.86           | 4.06              | 0.50            | 6.74            | 7.09             | 4.07           | 8.18            |
| 23               | 78.92                 | 0.23             | 0.84          | 0.53            | 1.12             | 0.79           | 3.50              | 0.31            | 7.51            | 7.76             | 3.39           | 8.47            |
| 26               | 77.64                 | 0.28             | 0.83          | 0.79            | 1.50             | 0.82           | 3.55              | 0.29            | 8.35            | 8.62             | 3.51           | 9.31            |
| 29               | 71.19                 | 0.34             | 0.86          | 1.19            | 2.84             | 0.86           | 3.38              | 0.31            | 8.92            | 9.51             | 3.42           | 10.10           |
| 32               | 64.95                 | 0.44             | 0.82          | 1.70            | 5.01             | 0.95           | 3.00              | 0.36            | 9.62            | 11.03            | 3.12           | 11.46           |
| 35               | 60.57                 | 0.58             | 0.84          | 2.21            | 7.32             | 1.11           | 2.63              | 0.44            | 10.96           | 13.42            | 2.84           | 13.71           |
| 38               | 57.59                 | 0.72             | 0.93          | 2.63            | 9.35             | 1.27           | 2.34              | 0.52            | 12.68           | 16.02            | 2.68           | 16.25           |
| 41               | 55.41                 | 0.83             | 1.06          | 2.91            | 10.83            | 1.38           | 2.15              | 0.59            | 14.10           | 18.07            | 2.62           | 18.26           |

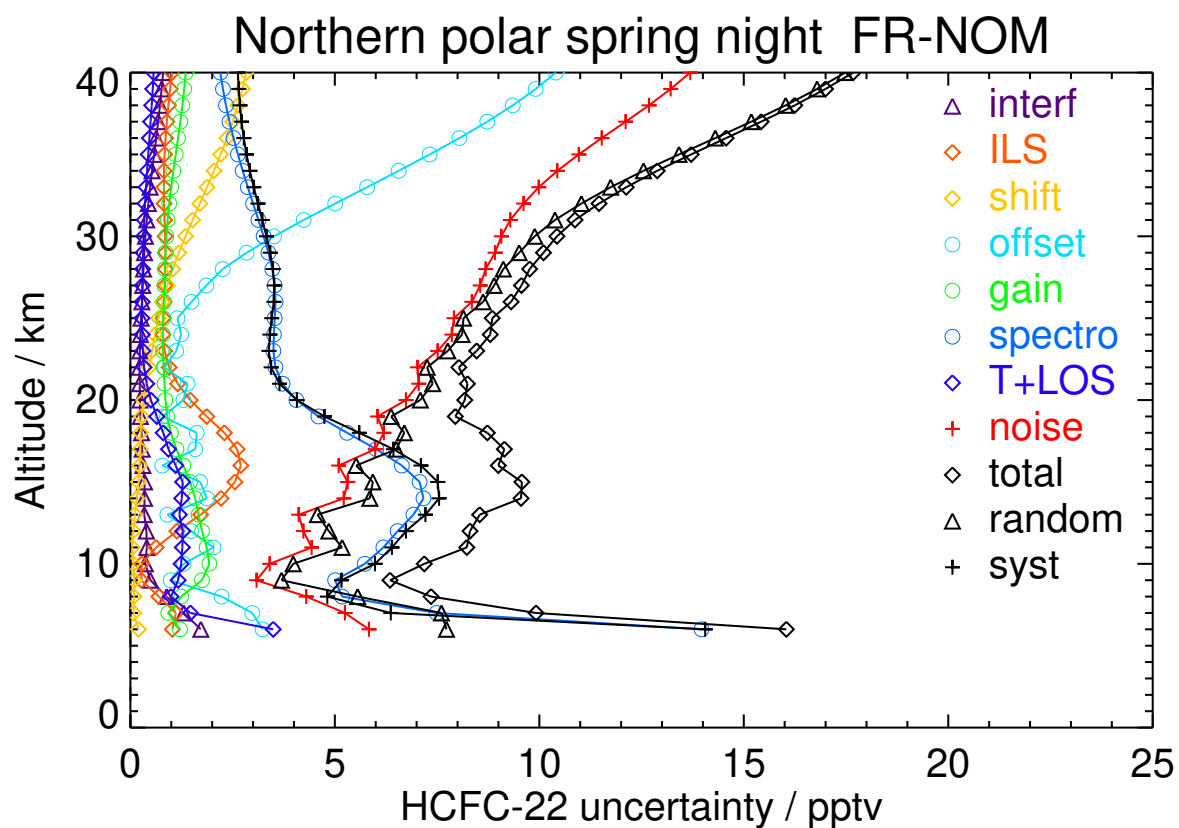

**Figure S4.** V8H\_F-22\_61 Northern polar spring night

**Table S6.** HCFC-22 error budget for Northern polar summer day. All uncertainties are  $1\sigma$ .

| altitude<br>(km) | mean target<br>(pptv) | interf<br>(pptv) | ILS<br>(pptv) | shift<br>(pptv) | offset<br>(pptv) | gain<br>(pptv) | spectro<br>(pptv) | T+LOS<br>(pptv) | noise<br>(pptv) | random<br>(pptv) | syst<br>(pptv) | total<br>(pptv) |
|------------------|-----------------------|------------------|---------------|-----------------|------------------|----------------|-------------------|-----------------|-----------------|------------------|----------------|-----------------|
| 8                | 151.82                | 1.31             | 1.81          | 0.11            | 2.63             | 1.42           | 12.19             | 2.73            | 5.38            | 8.81             | 11.02          | 14.11           |
| 11               | 151.37                | 0.39             | 0.69          | 0.06            | 0.94             | 1.72           | 5.10              | 0.92            | 3.28            | 3.89             | 5.19           | 6.49            |
| 14               | 140.48                | 0.37             | 1.26          | 0.09            | 0.86             | 1.72           | 5.94              | 0.93            | 4.22            | 4.55             | 6.22           | 7.70            |
| 17               | 126.11                | 0.30             | 2.92          | 0.27            | 0.90             | 1.66           | 7.30              | 1.08            | 5.20            | 5.50             | 7.97           | 9.69            |
| 20               | 104.85                | 0.24             | 2.01          | 0.35            | 0.92             | 1.21           | 5.82              | 0.74            | 6.18            | 6.37             | 6.20           | 8.90            |
| 23               | 92.03                 | 0.22             | 1.03          | 0.47            | 0.88             | 1.05           | 4.62              | 0.43            | 7.12            | 7.23             | 4.81           | 8.69            |
| 26               | 83.95                 | 0.26             | 1.04          | 0.72            | 1.10             | 0.99           | 4.04              | 0.35            | 8.01            | 8.15             | 4.24           | 9.18            |
| 29               | 77.96                 | 0.33             | 1.02          | 1.16            | 2.06             | 0.92           | 3.59              | 0.35            | 8.60            | 8.94             | 3.82           | 9.72            |
| 32               | 72.92                 | 0.42             | 0.88          | 1.79            | 3.75             | 1.00           | 3.16              | 0.38            | 9.08            | 10.02            | 3.40           | 10.58           |
| 35               | 67.29                 | 0.57             | 0.80          | 2.46            | 5.75             | 1.20           | 2.78              | 0.45            | 10.08           | 11.90            | 3.09           | 12.29           |
| 38               | 62.47                 | 0.74             | 0.85          | 3.04            | 7.64             | 1.41           | 2.48              | 0.54            | 11.64           | 14.29            | 2.92           | 14.59           |
| 41               | 59.05                 | 0.87             | 0.98          | 3.46            | 9.13             | 1.56           | 2.27              | 0.62            | 13.14           | 16.42            | 2.86           | 16.67           |

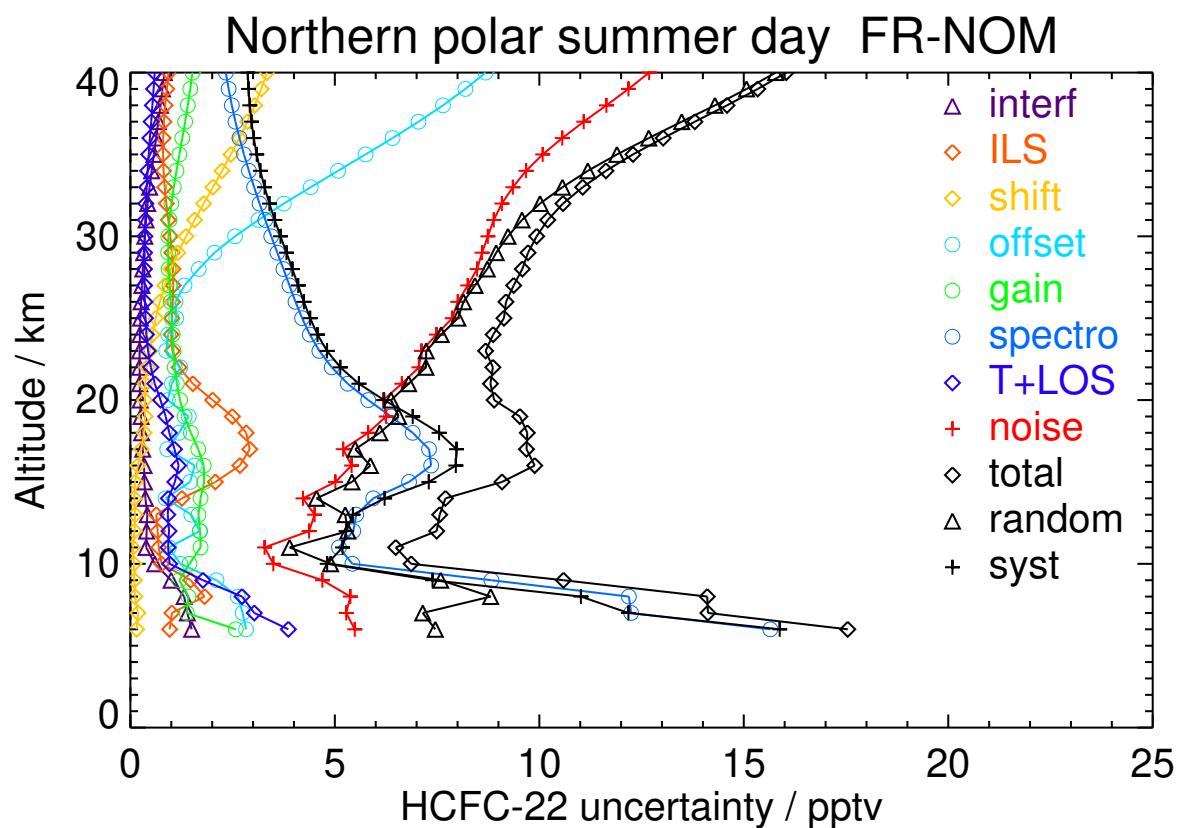

**Figure S5.** V8H\_F-22\_61 Northern polar summer day

**Table S7.** HCFC-22 error budget for Northern polar summer night. All uncertainties are  $1\sigma$ .

| altitude<br>(km) | mean target<br>(pptv) | interf<br>(pptv) | ILS<br>(pptv) | shift<br>(pptv) | offset<br>(pptv) | gain<br>(pptv) | spectro<br>(pptv) | T+LOS<br>(pptv) | noise<br>(pptv) | random<br>(pptv) | syst<br>(pptv) | total<br>(pptv) |
|------------------|-----------------------|------------------|---------------|-----------------|------------------|----------------|-------------------|-----------------|-----------------|------------------|----------------|-----------------|
| 8                | 155.28                | 1.48             | 2.18          | 0.08            | 2.93             | 1.39           | 14.66             | 3.53            | 5.91            | 8.34             | 14.50          | 16.73           |
| 11               | 153.16                | 0.39             | 0.32          | 0.04            | 0.69             | 1.69           | 5.17              | 0.88            | 3.06            | 3.75             | 5.14           | 6.36            |
| 14               | 142.72                | 0.38             | 1.13          | 0.08            | 0.74             | 1.69           | 6.03              | 0.95            | 4.18            | 4.51             | 6.26           | 7.72            |
| 17               | 127.99                | 0.31             | 3.09          | 0.22            | 0.94             | 1.78           | 7.63              | 1.18            | 5.24            | 5.51             | 8.39           | 10.04           |
| 20               | 105.09                | 0.24             | 2.33          | 0.32            | 1.01             | 1.29           | 6.18              | 0.82            | 6.33            | 6.51             | 6.69           | 9.34            |
| 23               | 90.16                 | 0.23             | 1.08          | 0.46            | 1.01             | 1.03           | 4.79              | 0.48            | 7.30            | 7.43             | 4.98           | 8.94            |
| 26               | 81.61                 | 0.26             | 0.91          | 0.70            | 1.17             | 0.89           | 4.00              | 0.36            | 8.18            | 8.32             | 4.18           | 9.31            |
| 29               | 75.36                 | 0.33             | 0.90          | 1.15            | 2.24             | 0.84           | 3.50              | 0.35            | 8.74            | 9.11             | 3.69           | 9.83            |
| 32               | 67.50                 | 0.43             | 0.79          | 1.75            | 4.05             | 0.93           | 3.00              | 0.38            | 9.27            | 10.29            | 3.21           | 10.78           |
| 35               | 60.42                 | 0.58             | 0.71          | 2.35            | 6.11             | 1.12           | 2.56              | 0.46            | 10.39           | 12.32            | 2.85           | 12.64           |
| 38               | 54.98                 | 0.73             | 0.73          | 2.86            | 8.01             | 1.31           | 2.24              | 0.55            | 12.03           | 14.78            | 2.65           | 15.01           |
| 41               | 51.30                 | 0.85             | 0.83          | 3.21            | 9.47             | 1.45           | 2.04              | 0.63            | 13.54           | 16.88            | 2.57           | 17.07           |

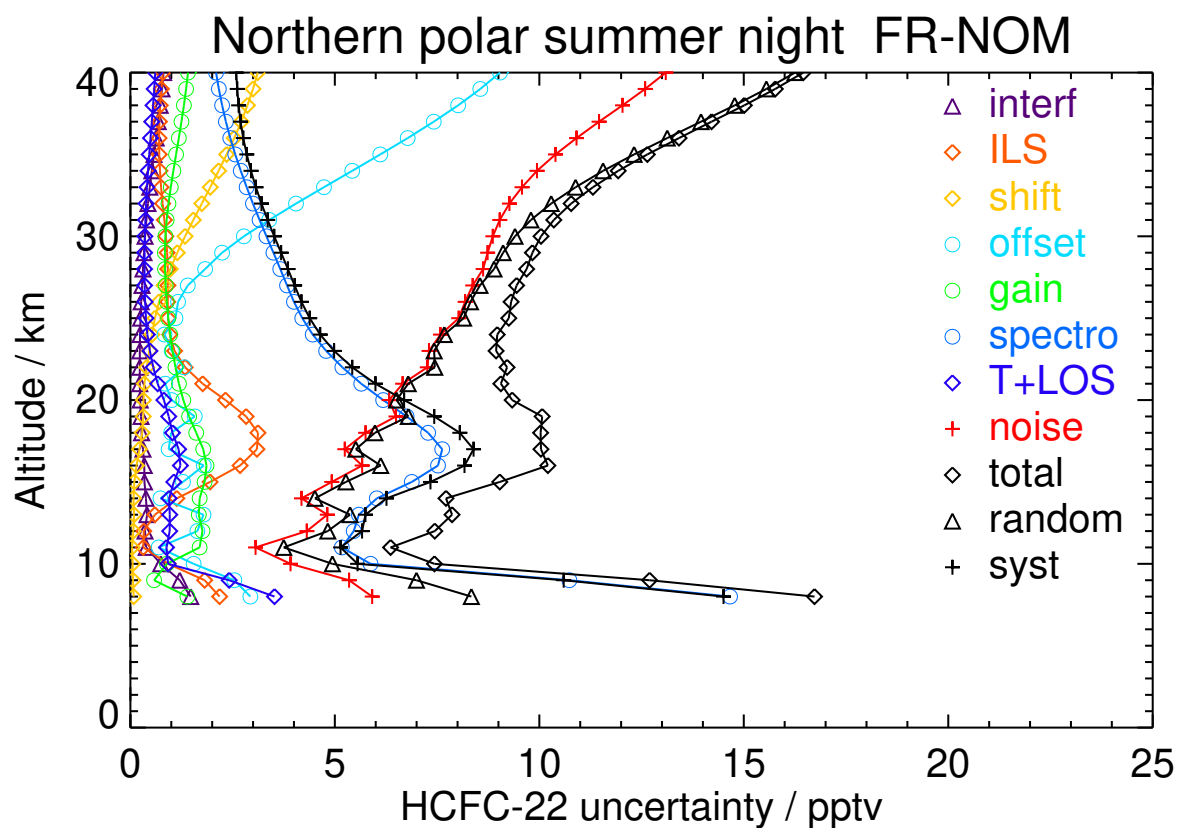

**Figure S6.** V8H\_F-22\_61 Northern polar summer night

**Table S8.** HCFC-22 error budget for Northern polar autumn day. All uncertainties are  $1\sigma$ .

| altitude<br>(km) | mean target<br>(pptv) | interf<br>(pptv) | ILS<br>(pptv) | shift<br>(pptv) | offset<br>(pptv) | gain<br>(pptv) | spectro<br>(pptv) | T+LOS<br>(pptv) | noise<br>(pptv) | random<br>(pptv) | syst<br>(pptv) | total<br>(pptv) |
|------------------|-----------------------|------------------|---------------|-----------------|------------------|----------------|-------------------|-----------------|-----------------|------------------|----------------|-----------------|
| 8                | 162.44                | 0.60             | 0.41          | 0.14            | 1.40             | 1.62           | 5.43              | 1.05            | 3.32            | 4.63             | 5.04           | 6.84            |
| 11               | 154.60                | 0.55             | 0.44          | 0.08            | 1.73             | 1.48           | 5.07              | 0.90            | 4.04            | 4.82             | 5.03           | 6.97            |
| 14               | 140.07                | 0.37             | 1.48          | 0.09            | 1.87             | 2.37           | 7.40              | 1.28            | 4.87            | 5.48             | 7.85           | 9.57            |
| 17               | 117.21                | 0.31             | 2.46          | 0.26            | 1.84             | 1.68           | 6.88              | 1.12            | 5.79            | 6.23             | 7.46           | 9.72            |
| 20               | 100.27                | 0.24             | 2.01          | 0.40            | 1.62             | 1.23           | 5.90              | 0.75            | 6.82            | 7.13             | 6.29           | 9.51            |
| 23               | 89.48                 | 0.23             | 1.16          | 0.50            | 1.40             | 1.11           | 4.73              | 0.48            | 7.82            | 8.02             | 4.94           | 9.42            |
| 26               | 82.58                 | 0.27             | 0.87          | 0.63            | 2.27             | 1.05           | 4.15              | 0.36            | 8.71            | 9.05             | 4.32           | 10.03           |
| 29               | 75.71                 | 0.33             | 0.78          | 0.83            | 4.54             | 0.97           | 3.74              | 0.33            | 9.69            | 10.76            | 3.89           | 11.44           |
| 32               | 67.03                 | 0.42             | 0.81          | 1.10            | 7.42             | 0.95           | 3.33              | 0.37            | 11.35           | 13.63            | 3.50           | 14.07           |
| 35               | 59.72                 | 0.53             | 0.91          | 1.35            | 10.00            | 0.98           | 2.97              | 0.43            | 13.32           | 16.74            | 3.18           | 17.04           |
| 38               | 54.47                 | 0.62             | 1.04          | 1.54            | 11.98            | 1.02           | 2.69              | 0.49            | 15.00           | 19.29            | 2.96           | 19.52           |
| 41               | 49.14                 | 0.70             | 1.15          | 1.78            | 12.98            | 1.05           | 2.40              | 0.53            | 15.86           | 20.61            | 2.75           | 20.79           |

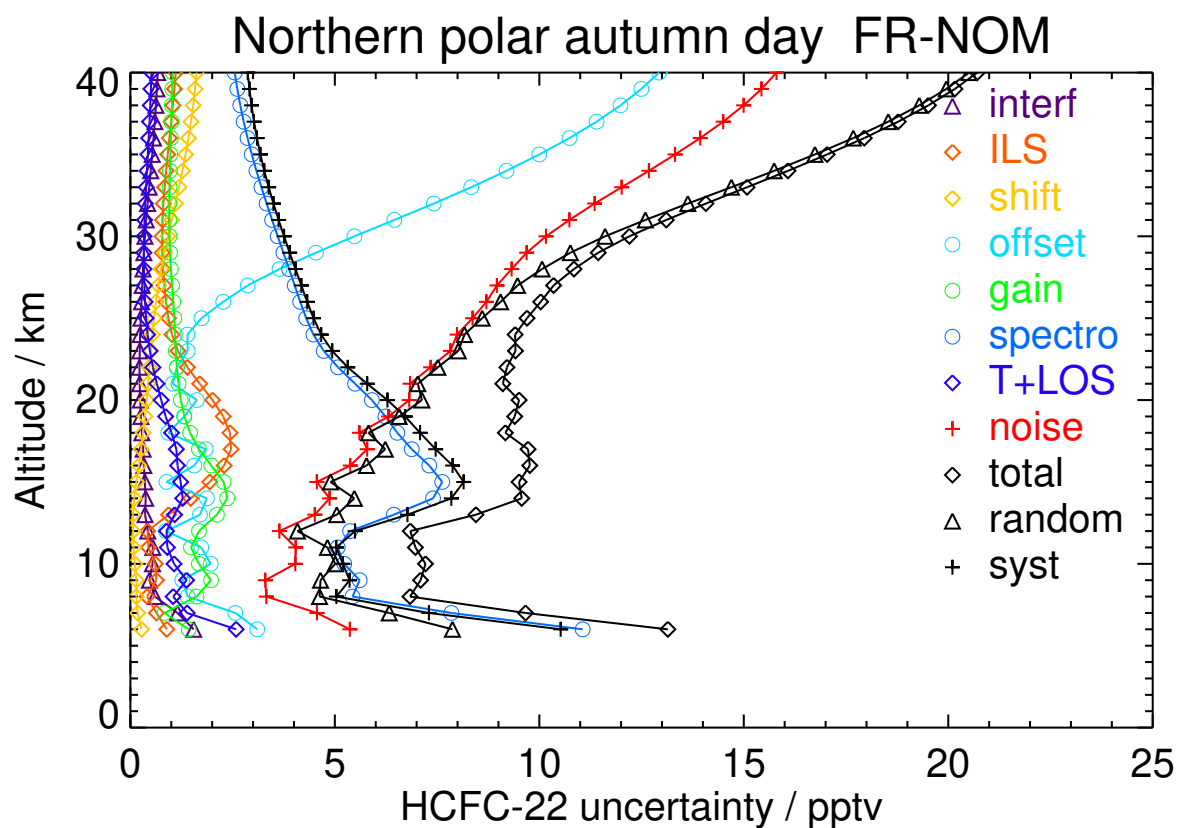

**Figure S7.** V8H\_F-22\_61 Northern polar autumn day

**Table S9.** HCFC-22 error budget for Northern polar autumn night. All uncertainties are  $1\sigma$ .

| altitude<br>(km) | mean target<br>(pptv) | interf<br>(pptv) | ILS<br>(pptv) | shift<br>(pptv) | offset<br>(pptv) | gain<br>(pptv) | spectro<br>(pptv) | T+LOS<br>(pptv) | noise<br>(pptv) | random<br>(pptv) | syst<br>(pptv) | total<br>(pptv) |
|------------------|-----------------------|------------------|---------------|-----------------|------------------|----------------|-------------------|-----------------|-----------------|------------------|----------------|-----------------|
| 8                | 160.08                | 0.68             | 0.48          | 0.14            | 1.57             | 1.41           | 5.77              | 1.06            | 3.53            | 5.14             | 5.06           | 7.21            |
| 11               | 152.71                | 0.52             | 0.44          | 0.07            | 1.96             | 1.69           | 5.26              | 0.97            | 4.24            | 5.11             | 5.25           | 7.33            |
| 14               | 138.24                | 0.37             | 1.51          | 0.10            | 2.01             | 2.28           | 7.43              | 1.27            | 5.03            | 5.65             | 7.87           | 9.69            |
| 17               | 113.28                | 0.31             | 2.50          | 0.27            | 1.89             | 1.68           | 6.99              | 1.13            | 6.00            | 6.46             | 7.57           | 9.95            |
| 20               | 94.98                 | 0.24             | 2.08          | 0.36            | 1.63             | 1.30           | 5.58              | 0.76            | 6.98            | 7.28             | 6.03           | 9.45            |
| 23               | 84.37                 | 0.23             | 1.19          | 0.46            | 1.42             | 1.01           | 4.51              | 0.49            | 7.93            | 8.12             | 4.73           | 9.39            |
| 26               | 75.31                 | 0.28             | 0.87          | 0.62            | 2.30             | 0.91           | 3.87              | 0.38            | 8.82            | 9.17             | 4.04           | 10.02           |
| 29               | 65.73                 | 0.34             | 0.78          | 0.88            | 4.49             | 0.89           | 3.23              | 0.34            | 9.75            | 10.79            | 3.40           | 11.32           |
| 32               | 57.65                 | 0.43             | 0.77          | 1.19            | 7.27             | 0.90           | 2.71              | 0.36            | 11.28           | 13.50            | 2.88           | 13.80           |
| 35               | 52.52                 | 0.55             | 0.83          | 1.47            | 9.81             | 0.94           | 2.34              | 0.43            | 13.17           | 16.52            | 2.56           | 16.72           |
| 38               | 49.29                 | 0.64             | 0.93          | 1.68            | 11.81            | 1.00           | 2.10              | 0.49            | 14.85           | 19.08            | 2.37           | 19.23           |
| 41               | 48.32                 | 0.72             | 1.00          | 1.91            | 12.85            | 1.05           | 1.91              | 0.54            | 15.73           | 20.44            | 2.25           | 20.56           |

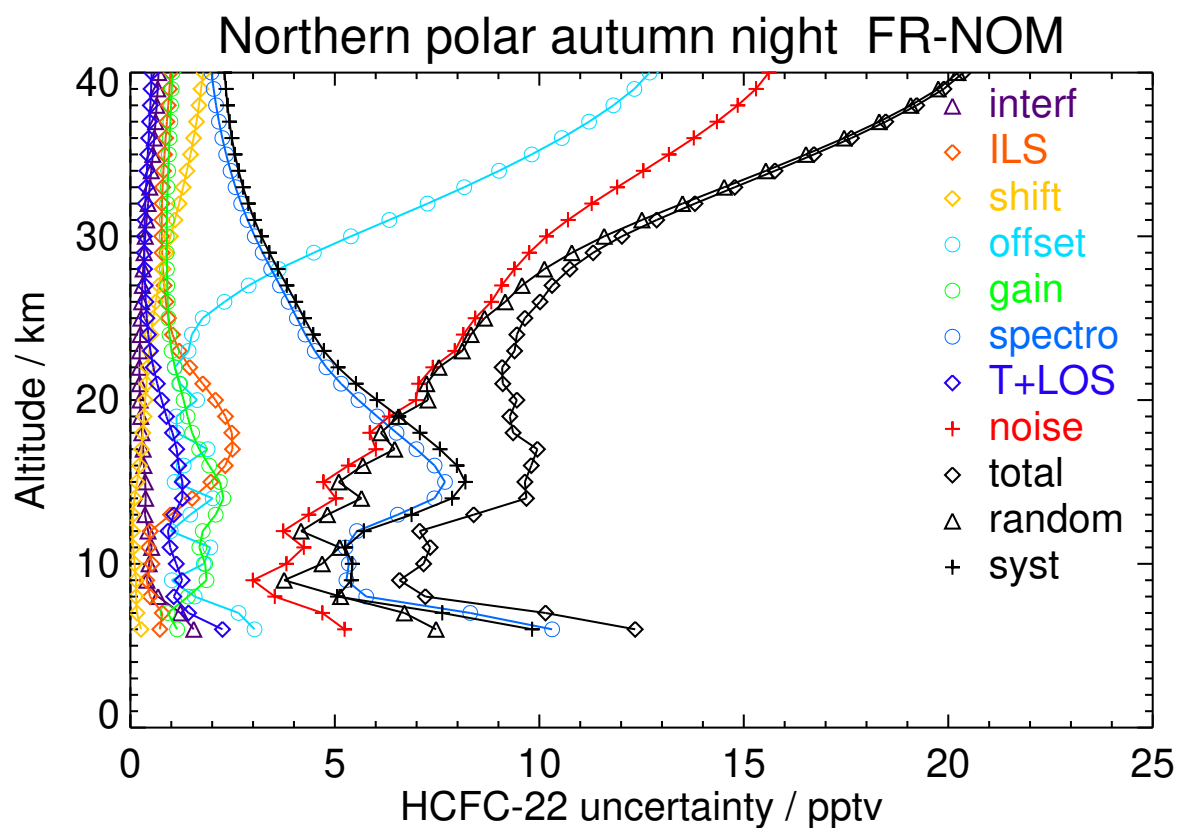

**Figure S8.** V8H\_F-22\_61 Northern polar autumn night

**Table S10.** HCFC-22 error budget for Northern midlatitude winter day. All uncertainties are  $1\sigma$ .

| altitude<br>(km) | mean target<br>(pptv) | interf<br>(pptv) | ILS<br>(pptv) | shift<br>(pptv) | offset<br>(pptv) | gain<br>(pptv) | spectro<br>(pptv) | T+LOS<br>(pptv) | noise<br>(pptv) | random<br>(pptv) | syst<br>(pptv) | total<br>(pptv) |
|------------------|-----------------------|------------------|---------------|-----------------|------------------|----------------|-------------------|-----------------|-----------------|------------------|----------------|-----------------|
| 5                | 161.68                | 1.65             | 0.63          | 0.25            | 3.00             | 1.11           | 9.74              | 2.44            | 5.51            | 7.61             | 9.31           | 12.02           |
| 8                | 158.16                | 0.59             | 0.58          | 0.15            | 1.56             | 2.09           | 5.76              | 1.60            | 3.87            | 5.56             | 5.23           | 7.64            |
| 11               | 144.79                | 0.46             | 0.40          | 0.07            | 0.90             | 1.60           | 5.36              | 1.04            | 3.79            | 4.29             | 5.43           | 6.92            |
| 14               | 130.25                | 0.37             | 1.88          | 0.11            | 0.76             | 1.93           | 7.13              | 1.26            | 4.60            | 4.98             | 7.54           | 9.03            |
| 17               | 115.25                | 0.30             | 2.53          | 0.29            | 0.72             | 1.45           | 6.41              | 1.00            | 5.54            | 5.80             | 6.95           | 9.05            |
| 20               | 101.52                | 0.24             | 1.81          | 0.41            | 0.78             | 1.23           | 5.45              | 0.68            | 6.60            | 6.81             | 5.74           | 8.91            |
| 23               | 95.29                 | 0.24             | 1.01          | 0.56            | 0.97             | 1.10           | 4.56              | 0.41            | 7.66            | 7.80             | 4.73           | 9.12            |
| 26               | 88.07                 | 0.28             | 0.97          | 0.79            | 1.72             | 1.03           | 4.25              | 0.35            | 8.60            | 8.85             | 4.43           | 9.89            |
| 29               | 80.17                 | 0.35             | 0.98          | 1.14            | 3.42             | 1.01           | 3.83              | 0.34            | 9.23            | 9.95             | 4.02           | 10.73           |
| 32               | 70.76                 | 0.45             | 0.93          | 1.56            | 5.74             | 1.04           | 3.35              | 0.37            | 10.35           | 11.97            | 3.56           | 12.49           |
| 35               | 63.92                 | 0.57             | 0.89          | 1.91            | 8.01             | 1.13           | 2.92              | 0.41            | 12.10           | 14.67            | 3.18           | 15.01           |
| 38               | 60.01                 | 0.68             | 0.92          | 2.16            | 9.86             | 1.22           | 2.61              | 0.46            | 13.87           | 17.19            | 2.93           | 17.44           |
| 41               | 57.76                 | 0.74             | 0.98          | 2.33            | 11.05            | 1.29           | 2.40              | 0.49            | 15.08           | 18.87            | 2.79           | 19.08           |

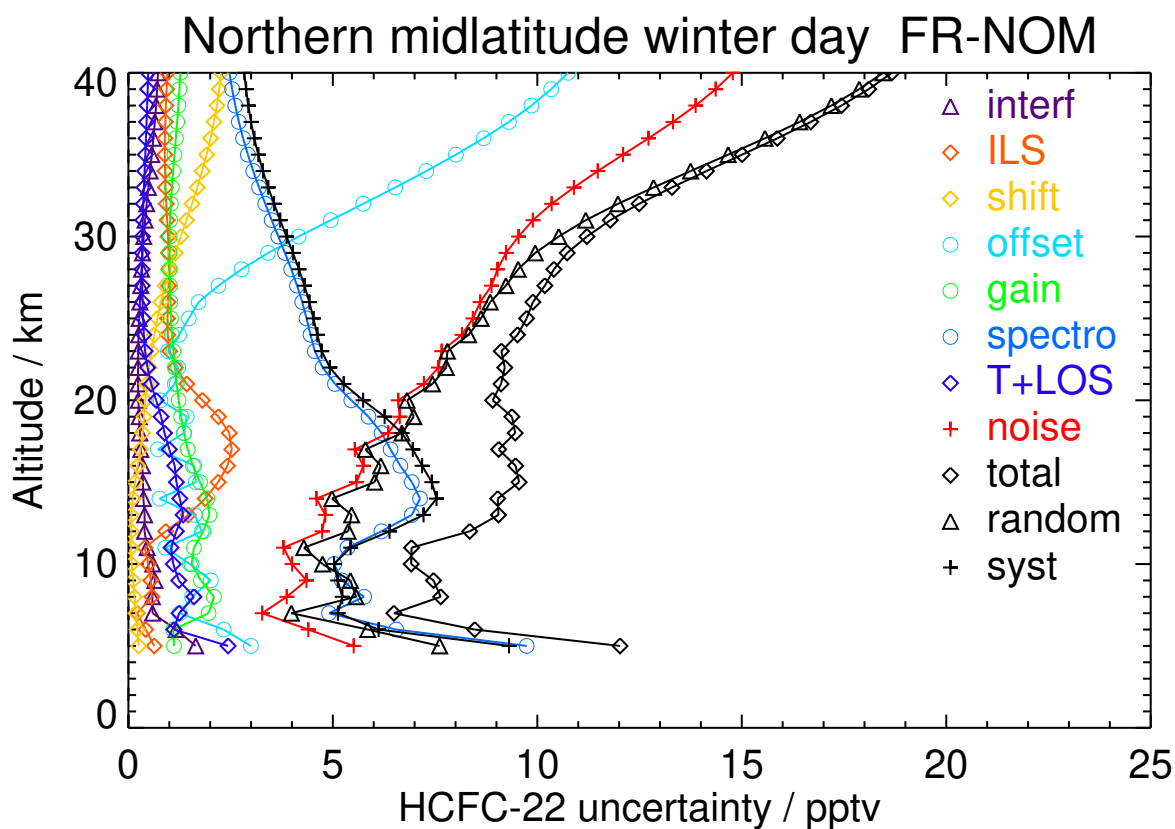

**Figure S9.** V8H\_F-22\_61 Northern midlatitude winter day

**Table S11.** HCFC-22 error budget for Northern midlatitude winter night. All uncertainties are  $1\sigma$ .

| altitude<br>(km) | mean target<br>(pptv) | interf<br>(pptv) | ILS<br>(pptv) | shift<br>(pptv) | offset<br>(pptv) | gain<br>(pptv) | spectro<br>(pptv) | T+LOS<br>(pptv) | noise<br>(pptv) | random<br>(pptv) | syst<br>(pptv) | total<br>(pptv) |
|------------------|-----------------------|------------------|---------------|-----------------|------------------|----------------|-------------------|-----------------|-----------------|------------------|----------------|-----------------|
| 5                | 161.11                | 1.62             | 0.64          | 0.22            | 2.89             | 0.95           | 10.23             | 2.48            | 5.44            | 7.67             | 9.70           | 12.36           |
| 8                | 160.01                | 0.36             | 0.14          | 0.16            | 0.71             | 2.21           | 5.66              | 1.61            | 2.99            | 3.72             | 5.94           | 7.01            |
| 11               | 145.53                | 0.53             | 0.37          | 0.06            | 1.08             | 1.66           | 5.63              | 1.14            | 3.96            | 4.58             | 5.67           | 7.29            |
| 14               | 125.30                | 0.37             | 1.82          | 0.10            | 1.19             | 1.88           | 6.92              | 1.39            | 4.76            | 5.23             | 7.31           | 8.99            |
| 17               | 112.79                | 0.31             | 2.33          | 0.26            | 1.21             | 1.33           | 5.72              | 0.94            | 5.61            | 5.92             | 6.23           | 8.60            |
| 20               | 102.24                | 0.25             | 1.95          | 0.45            | 1.16             | 1.13           | 5.20              | 0.65            | 6.60            | 6.84             | 5.56           | 8.81            |
| 23               | 95.22                 | 0.24             | 1.11          | 0.61            | 1.05             | 0.99           | 4.44              | 0.39            | 7.54            | 7.69             | 4.62           | 8.97            |
| 26               | 92.49                 | 0.28             | 1.00          | 0.83            | 1.55             | 1.05           | 4.26              | 0.31            | 8.42            | 8.64             | 4.44           | 9.72            |
| 29               | 86.30                 | 0.34             | 1.03          | 1.13            | 3.19             | 1.05           | 4.04              | 0.31            | 9.10            | 9.75             | 4.24           | 10.63           |
| 32               | 78.60                 | 0.44             | 1.02          | 1.48            | 5.54             | 1.06           | 3.67              | 0.35            | 10.19           | 11.73            | 3.89           | 12.36           |
| 35               | 72.87                 | 0.56             | 1.03          | 1.81            | 7.88             | 1.11           | 3.27              | 0.40            | 11.91           | 14.43            | 3.54           | 14.86           |
| 38               | 68.93                 | 0.66             | 1.08          | 2.05            | 9.82             | 1.19           | 2.94              | 0.45            | 13.70           | 17.01            | 3.28           | 17.33           |
| 41               | 65.80                 | 0.73             | 1.15          | 2.19            | 11.15            | 1.25           | 2.72              | 0.48            | 15.02           | 18.86            | 3.12           | 19.12           |

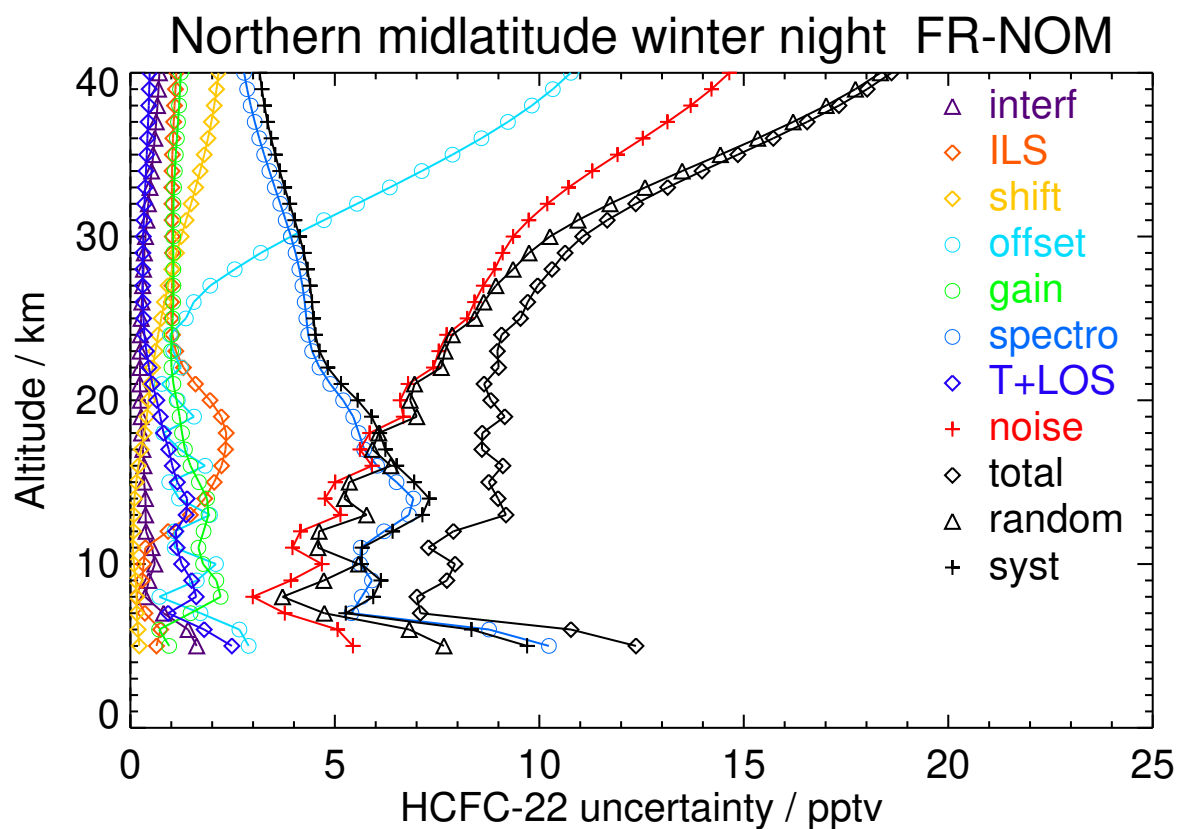

**Figure S10.** V8H\_F-22\_61 Northern midlatitude winter night

**Table S12.** HCFC-22 error budget for Northern midlatitude spring day. All uncertainties are  $1\sigma$ .

| altitude<br>(km) | mean target<br>(pptv) | interf<br>(pptv) | ILS<br>(pptv) | shift<br>(pptv) | offset<br>(pptv) | gain<br>(pptv) | spectro<br>(pptv) | T+LOS<br>(pptv) | noise<br>(pptv) | random<br>(pptv) | syst<br>(pptv) | total<br>(pptv) |
|------------------|-----------------------|------------------|---------------|-----------------|------------------|----------------|-------------------|-----------------|-----------------|------------------|----------------|-----------------|
| 8                | 155.58                | 0.88             | 0.59          | 0.11            | 2.11             | 1.12           | 6.14              | 0.95            | 4.07            | 5.75             | 5.37           | 7.87            |
| 11               | 146.39                | 0.49             | 0.75          | 0.07            | 2.19             | 1.83           | 5.43              | 1.04            | 4.50            | 5.87             | 5.03           | 7.73            |
| 14               | 132.72                | 0.36             | 1.69          | 0.10            | 1.98             | 1.77           | 6.75              | 1.16            | 5.11            | 5.76             | 7.06           | 9.11            |
| 17               | 116.30                | 0.30             | 2.82          | 0.27            | 1.66             | 1.46           | 7.25              | 1.09            | 5.96            | 6.41             | 7.83           | 10.12           |
| 20               | 98.64                 | 0.24             | 2.14          | 0.31            | 1.35             | 1.40           | 5.68              | 0.73            | 6.75            | 7.12             | 6.02           | 9.32            |
| 23               | 90.57                 | 0.23             | 1.15          | 0.47            | 1.11             | 1.09           | 4.56              | 0.46            | 7.61            | 7.83             | 4.64           | 9.10            |
| 26               | 84.99                 | 0.28             | 0.91          | 0.72            | 1.56             | 0.90           | 4.13              | 0.36            | 8.43            | 8.69             | 4.17           | 9.63            |
| 29               | 79.76                 | 0.34             | 0.94          | 1.16            | 2.82             | 0.92           | 3.76              | 0.35            | 8.91            | 9.49             | 3.85           | 10.24           |
| 32               | 73.15                 | 0.44             | 0.99          | 1.76            | 4.88             | 1.01           | 3.33              | 0.39            | 9.48            | 10.86            | 3.50           | 11.41           |
| 35               | 68.48                 | 0.59             | 1.05          | 2.34            | 7.10             | 1.16           | 2.95              | 0.46            | 10.74           | 13.13            | 3.23           | 13.52           |
| 38               | 64.53                 | 0.74             | 1.17          | 2.80            | 9.08             | 1.32           | 2.63              | 0.55            | 12.44           | 15.70            | 3.06           | 15.99           |
| 41               | 61.13                 | 0.85             | 1.32          | 3.10            | 10.55            | 1.43           | 2.41              | 0.61            | 13.88           | 17.76            | 2.98           | 18.00           |

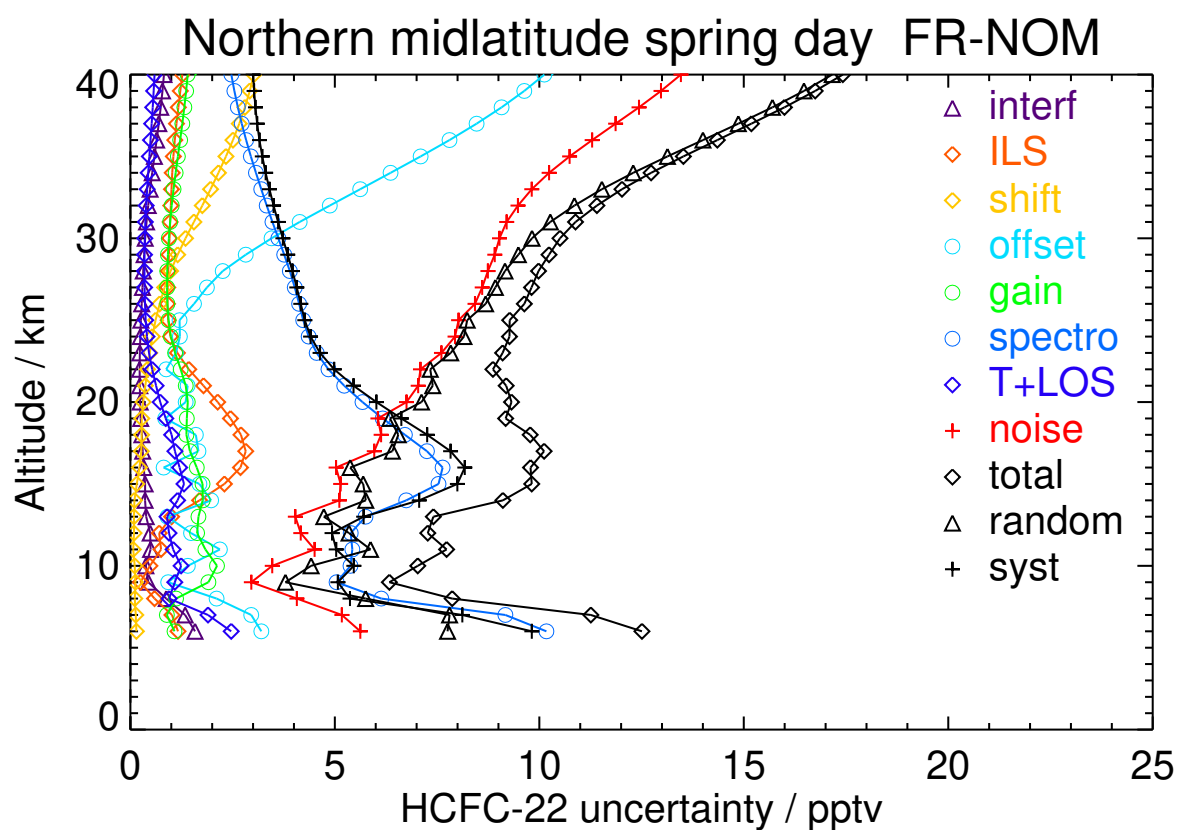

**Figure S11.** V8H\_F-22\_61 Northern midlatitude spring day

**Table S13.** HCFC-22 error budget for Northern midlatitude spring night. All uncertainties are  $1\sigma$ .

| altitude<br>(km) | mean target<br>(pptv) | interf<br>(pptv) | ILS<br>(pptv) | shift<br>(pptv) | offset<br>(pptv) | gain<br>(pptv) | spectro<br>(pptv) | T+LOS<br>(pptv) | noise<br>(pptv) | random<br>(pptv) | syst<br>(pptv) | total<br>(pptv) |
|------------------|-----------------------|------------------|---------------|-----------------|------------------|----------------|-------------------|-----------------|-----------------|------------------|----------------|-----------------|
| 8                | 151.05                | 0.95             | 0.81          | 0.12            | 2.33             | 1.22           | 5.93              | 0.99            | 4.36            | 6.13             | 5.11           | 7.98            |
| 11               | 141.20                | 0.40             | 0.43          | 0.08            | 1.98             | 1.78           | 5.67              | 1.09            | 4.25            | 5.30             | 5.55           | 7.67            |
| 14               | 129.73                | 0.34             | 1.71          | 0.10            | 1.74             | 1.73           | 6.55              | 1.10            | 4.93            | 5.53             | 6.85           | 8.80            |
| 17               | 112.49                | 0.29             | 2.67          | 0.29            | 1.48             | 1.41           | 6.86              | 1.00            | 5.76            | 6.17             | 7.39           | 9.63            |
| 20               | 96.26                 | 0.24             | 1.69          | 0.32            | 1.23             | 1.06           | 5.33              | 0.63            | 6.59            | 6.87             | 5.55           | 8.83            |
| 23               | 89.54                 | 0.23             | 0.95          | 0.50            | 1.01             | 0.93           | 4.25              | 0.38            | 7.47            | 7.65             | 4.31           | 8.78            |
| 26               | 88.34                 | 0.27             | 0.92          | 0.73            | 1.40             | 0.91           | 3.97              | 0.31            | 8.28            | 8.47             | 4.10           | 9.41            |
| 29               | 84.72                 | 0.34             | 0.96          | 1.15            | 2.70             | 0.95           | 3.74              | 0.32            | 8.85            | 9.36             | 3.93           | 10.15           |
| 32               | 78.86                 | 0.43             | 0.91          | 1.69            | 4.77             | 1.06           | 3.38              | 0.36            | 9.46            | 10.76            | 3.62           | 11.35           |
| 35               | 72.23                 | 0.57             | 0.90          | 2.25            | 7.00             | 1.23           | 3.00              | 0.44            | 10.72           | 13.03            | 3.31           | 13.45           |
| 38               | 66.65                 | 0.73             | 0.97          | 2.72            | 9.00             | 1.40           | 2.69              | 0.53            | 12.41           | 15.61            | 3.11           | 15.92           |
| 41               | 63.24                 | 0.84             | 1.09          | 3.03            | 10.47            | 1.51           | 2.47              | 0.60            | 13.87           | 17.68            | 3.01           | 17.93           |

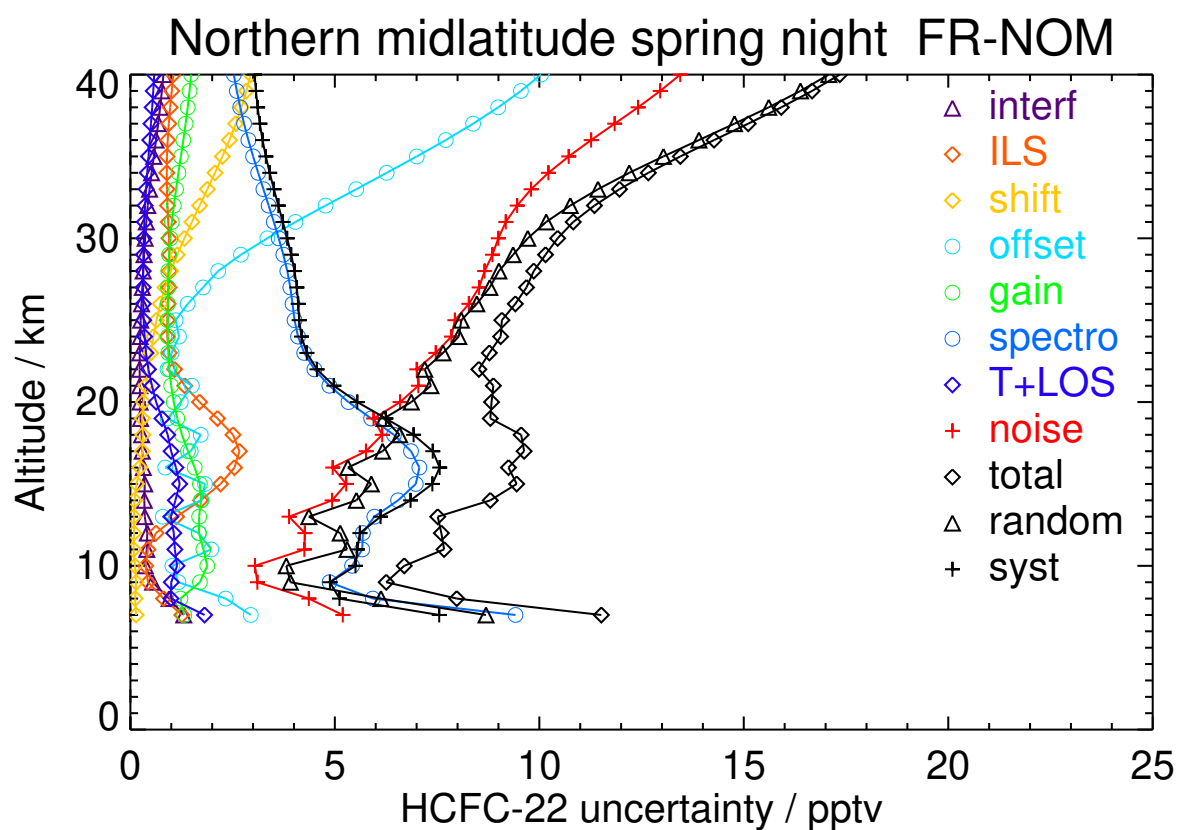

**Figure S12.** V8H\_F-22\_61 Northern midlatitude spring night

**Table S14.** HCFC-22 error budget for Northern midlatitude summer day. All uncertainties are  $1\sigma$ .

| altitude<br>(km) | mean target<br>(pptv) | interf<br>(pptv) | ILS<br>(pptv) | shift<br>(pptv) | offset<br>(pptv) | gain<br>(pptv) | spectro<br>(pptv) | T+LOS<br>(pptv) | noise<br>(pptv) | random<br>(pptv) | syst<br>(pptv) | total<br>(pptv) |
|------------------|-----------------------|------------------|---------------|-----------------|------------------|----------------|-------------------|-----------------|-----------------|------------------|----------------|-----------------|
| 8                | 156.23                | 1.34             | 1.20          | 0.19            | 2.72             | 1.16           | 9.07              | 2.22            | 5.53            | 7.89             | 8.21           | 11.39           |
| 11               | 162.01                | 0.44             | 1.11          | 0.14            | 1.03             | 1.70           | 5.21              | 1.05            | 3.31            | 4.23             | 5.17           | 6.68            |
| 14               | 153.08                | 0.48             | 0.66          | 0.11            | 0.77             | 1.40           | 5.27              | 0.79            | 4.27            | 5.03             | 4.96           | 7.06            |
| 17               | 136.68                | 0.35             | 3.42          | 0.29            | 0.80             | 1.95           | 9.30              | 1.40            | 5.40            | 5.81             | 10.01          | 11.57           |
| 20               | 116.54                | 0.25             | 2.59          | 0.27            | 0.83             | 1.37           | 7.32              | 0.99            | 6.36            | 6.59             | 7.80           | 10.22           |
| 23               | 98.97                 | 0.23             | 1.26          | 0.49            | 0.85             | 1.14           | 5.52              | 0.61            | 7.29            | 7.41             | 5.74           | 9.37            |
| 26               | 87.81                 | 0.27             | 1.08          | 0.75            | 1.15             | 0.93           | 4.49              | 0.43            | 8.06            | 8.20             | 4.68           | 9.44            |
| 29               | 81.45                 | 0.34             | 1.05          | 1.21            | 2.17             | 0.88           | 3.79              | 0.37            | 8.62            | 9.00             | 4.00           | 9.85            |
| 32               | 75.08                 | 0.43             | 0.94          | 1.80            | 3.94             | 1.00           | 3.24              | 0.38            | 9.10            | 10.11            | 3.49           | 10.69           |
| 35               | 69.92                 | 0.58             | 0.88          | 2.39            | 5.98             | 1.22           | 2.80              | 0.43            | 10.16           | 12.06            | 3.14           | 12.46           |
| 38               | 66.01                 | 0.72             | 0.93          | 2.87            | 7.89             | 1.43           | 2.48              | 0.49            | 11.80           | 14.52            | 2.95           | 14.81           |
| 41               | 62.98                 | 0.83             | 1.04          | 3.19            | 9.35             | 1.58           | 2.27              | 0.55            | 13.32           | 16.62            | 2.89           | 16.87           |

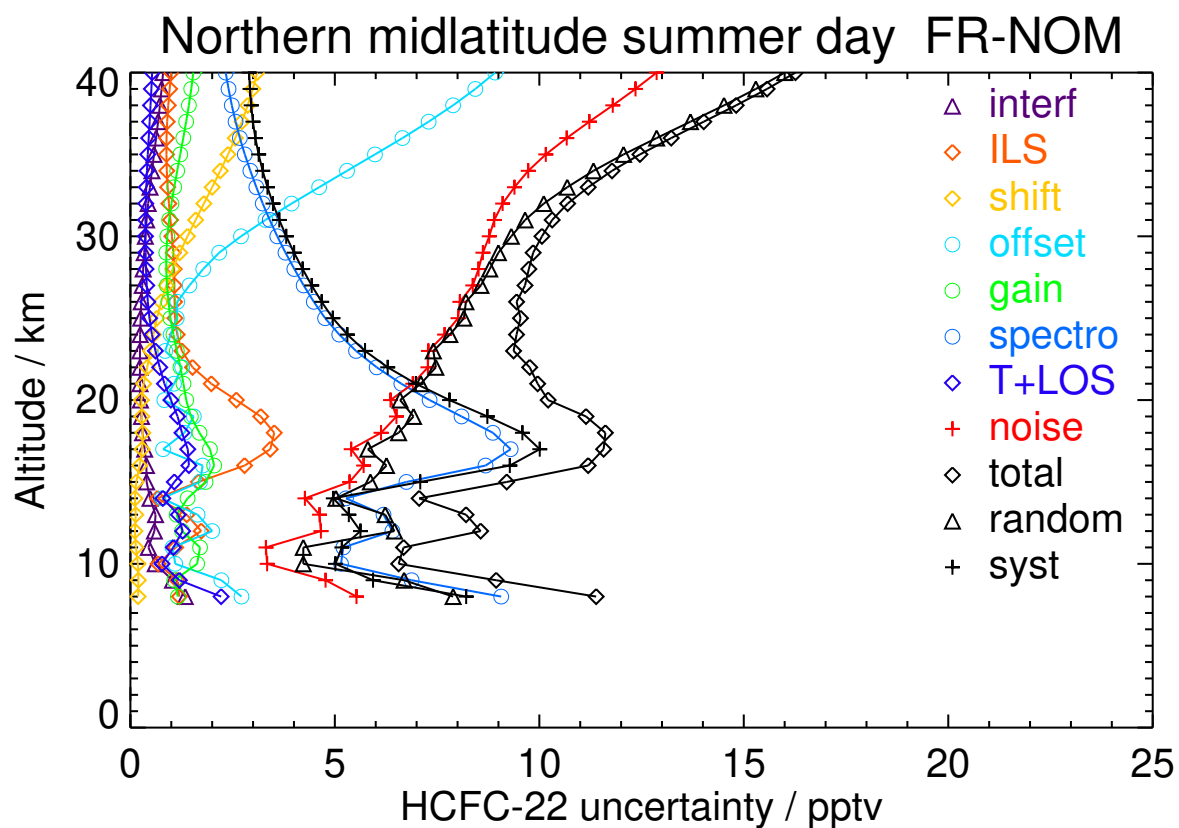

**Figure S13.** V8H\_F-22\_61 Northern midlatitude summer day

**Table S15.** HCFC-22 error budget for Northern midlatitude summer night. All uncertainties are  $1\sigma$ .

| altitude<br>(km) | mean target<br>(pptv) | interf<br>(pptv) | ILS<br>(pptv) | shift<br>(pptv) | offset<br>(pptv) | gain<br>(pptv) | spectro<br>(pptv) | T+LOS<br>(pptv) | noise<br>(pptv) | random<br>(pptv) | syst<br>(pptv) | total<br>(pptv) |
|------------------|-----------------------|------------------|---------------|-----------------|------------------|----------------|-------------------|-----------------|-----------------|------------------|----------------|-----------------|
| 8                | 165.91                | 1.37             | 0.99          | 0.17            | 2.71             | 1.10           | 8.92              | 2.29            | 5.86            | 8.17             | 7.99           | 11.43           |
| 11               | 164.44                | 0.43             | 0.70          | 0.11            | 0.68             | 1.73           | 5.15              | 0.96            | 3.15            | 3.79             | 5.20           | 6.44            |
| 14               | 152.71                | 0.53             | 0.84          | 0.10            | 0.77             | 1.20           | 5.29              | 0.84            | 4.27            | 5.28             | 4.69           | 7.06            |
| 17               | 135.08                | 0.35             | 3.16          | 0.22            | 1.03             | 1.77           | 8.93              | 1.47            | 5.48            | 5.93             | 9.54           | 11.24           |
| 20               | 112.81                | 0.25             | 2.77          | 0.26            | 1.08             | 1.27           | 7.39              | 1.06            | 6.48            | 6.74             | 7.93           | 10.41           |
| 23               | 95.05                 | 0.24             | 1.31          | 0.46            | 0.98             | 1.09           | 5.46              | 0.62            | 7.47            | 7.61             | 5.67           | 9.49            |
| 26               | 87.15                 | 0.27             | 1.01          | 0.71            | 1.22             | 0.91           | 4.35              | 0.42            | 8.26            | 8.41             | 4.53           | 9.55            |
| 29               | 82.64                 | 0.34             | 0.95          | 1.16            | 2.28             | 0.86           | 3.72              | 0.37            | 8.76            | 9.15             | 3.91           | 9.95            |
| 32               | 77.05                 | 0.44             | 0.85          | 1.74            | 4.11             | 0.97           | 3.22              | 0.39            | 9.32            | 10.36            | 3.44           | 10.92           |
| 35               | 72.30                 | 0.58             | 0.79          | 2.30            | 6.17             | 1.16           | 2.81              | 0.46            | 10.50           | 12.42            | 3.10           | 12.80           |
| 38               | 68.50                 | 0.73             | 0.84          | 2.77            | 8.07             | 1.34           | 2.51              | 0.54            | 12.17           | 14.90            | 2.92           | 15.18           |
| 41               | 65.12                 | 0.83             | 0.94          | 3.08            | 9.50             | 1.47           | 2.31              | 0.61            | 13.69           | 16.99            | 2.83           | 17.22           |

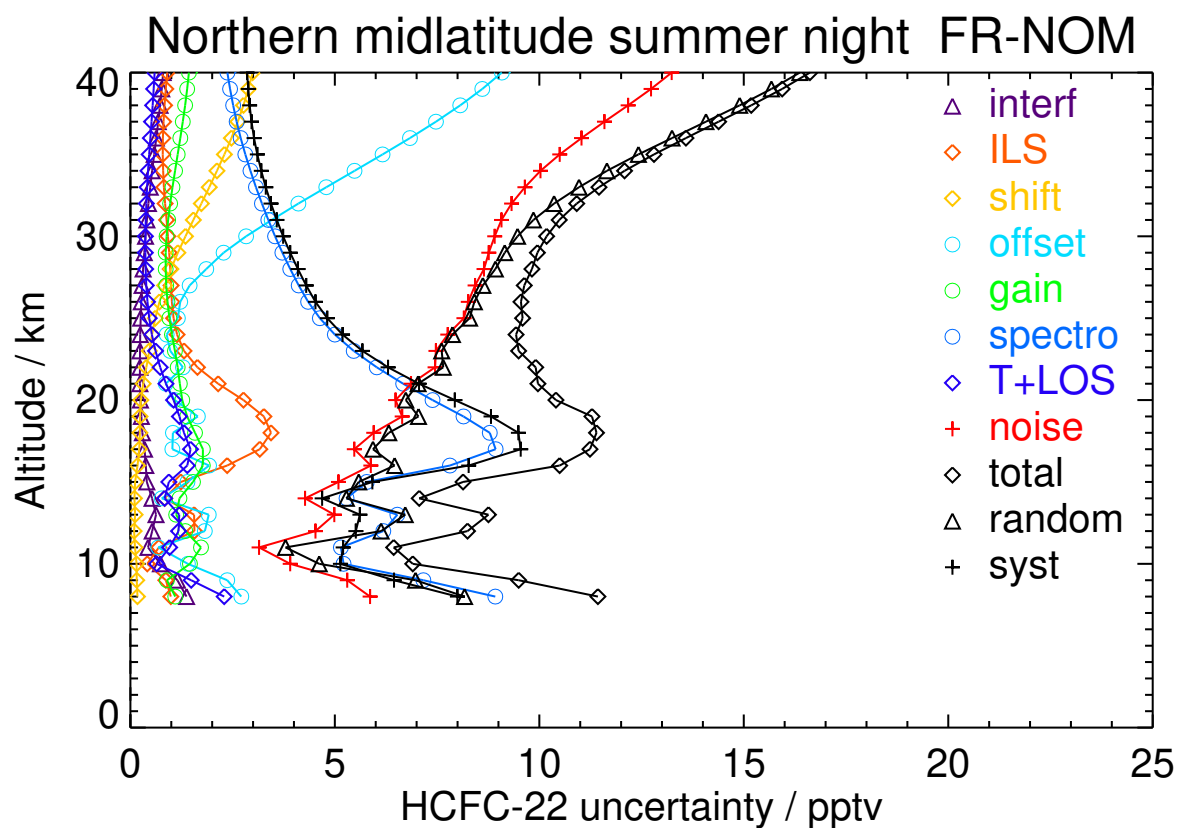

**Figure S14.** V8H\_F-22\_61 Northern midlatitude summer night

**Table S16.** HCFC-22 error budget for Northern midlatitude autumn day. All uncertainties are  $1\sigma$ .

| altitude<br>(km) | mean target<br>(pptv) | interf<br>(pptv) | ILS<br>(pptv) | shift<br>(pptv) | offset<br>(pptv) | gain<br>(pptv) | spectro<br>(pptv) | T+LOS<br>(pptv) | noise<br>(pptv) | random<br>(pptv) | syst<br>(pptv) | total<br>(pptv) |
|------------------|-----------------------|------------------|---------------|-----------------|------------------|----------------|-------------------|-----------------|-----------------|------------------|----------------|-----------------|
| 8                | 163.58                | 1.22             | 1.92          | 0.24            | 2.73             | 1.47           | 8.02              | 1.43            | 5.08            | 8.49             | 5.91           | 10.34           |
| 11               | 161.88                | 0.50             | 0.67          | 0.07            | 0.95             | 1.73           | 5.70              | 0.93            | 3.15            | 4.72             | 5.05           | 6.92            |
| 14               | 155.64                | 0.50             | 1.08          | 0.08            | 1.49             | 1.75           | 6.30              | 1.03            | 4.71            | 6.03             | 5.77           | 8.35            |
| 17               | 133.04                | 0.34             | 3.37          | 0.26            | 1.62             | 1.81           | 9.22              | 1.57            | 5.83            | 6.40             | 9.89           | 11.79           |
| 20               | 108.29                | 0.25             | 2.94          | 0.30            | 1.45             | 1.27           | 7.19              | 1.09            | 6.73            | 7.14             | 7.72           | 10.52           |
| 23               | 93.39                 | 0.23             | 1.46          | 0.49            | 1.25             | 1.14           | 5.13              | 0.60            | 7.59            | 7.81             | 5.34           | 9.47            |
| 26               | 87.41                 | 0.27             | 1.08          | 0.75            | 1.47             | 1.03           | 4.26              | 0.41            | 8.34            | 8.55             | 4.45           | 9.64            |
| 29               | 82.54                 | 0.33             | 0.99          | 1.10            | 2.85             | 0.95           | 3.80              | 0.34            | 8.81            | 9.35             | 4.01           | 10.18           |
| 32               | 78.37                 | 0.42             | 0.93          | 1.54            | 5.06             | 1.01           | 3.45              | 0.36            | 9.57            | 10.96            | 3.68           | 11.56           |
| 35               | 75.26                 | 0.55             | 0.92          | 1.96            | 7.44             | 1.14           | 3.15              | 0.42            | 11.04           | 13.48            | 3.43           | 13.91           |
| 38               | 72.99                 | 0.68             | 0.98          | 2.30            | 9.53             | 1.27           | 2.90              | 0.50            | 12.80           | 16.16            | 3.26           | 16.49           |
| 41               | 70.89                 | 0.76             | 1.08          | 2.51            | 11.04            | 1.37           | 2.71              | 0.55            | 14.23           | 18.23            | 3.16           | 18.50           |

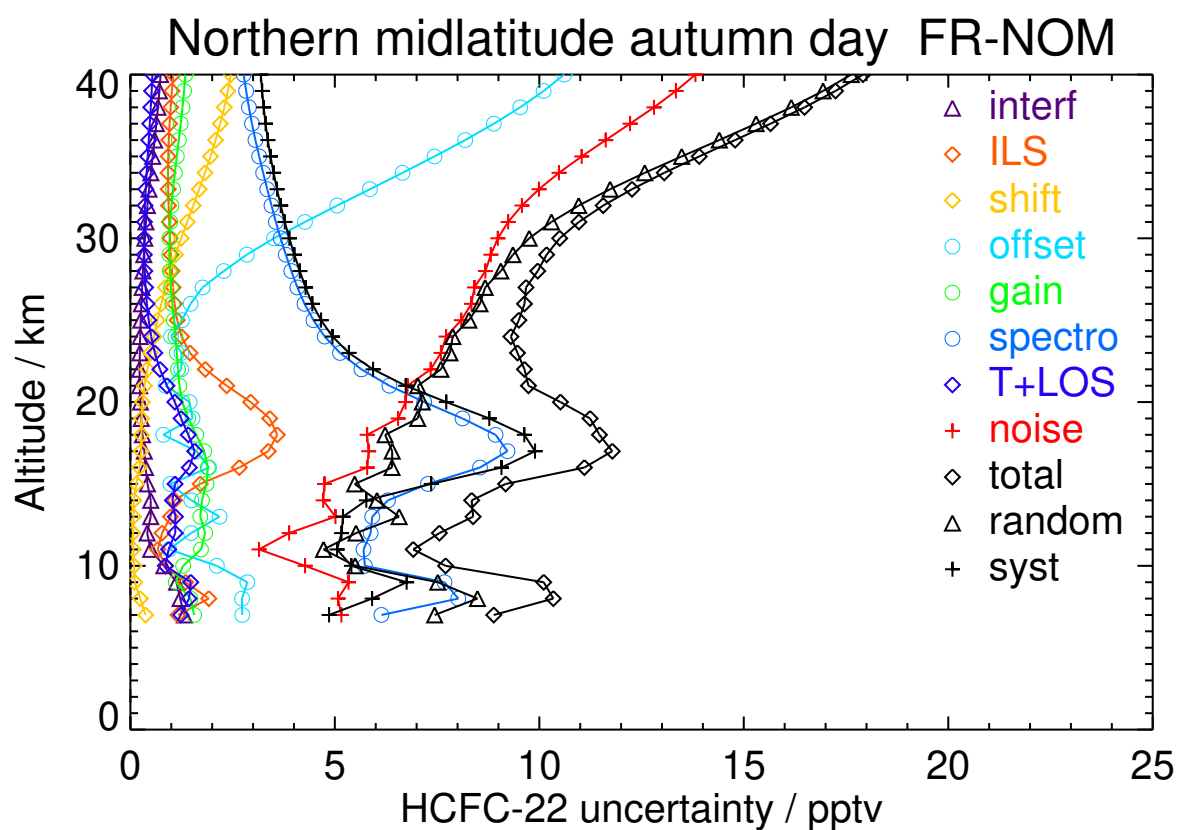

**Figure S15.** V8H\_F-22\_61 Northern midlatitude autumn day

**Table S17.** HCFC-22 error budget for Northern midlatitude autumn night. All uncertainties are  $1\sigma$ .

| altitude<br>(km) | mean target<br>(pptv) | interf<br>(pptv) | ILS<br>(pptv) | shift<br>(pptv) | offset<br>(pptv) | gain<br>(pptv) | spectro<br>(pptv) | T+LOS<br>(pptv) | noise<br>(pptv) | random<br>(pptv) | syst<br>(pptv) | total<br>(pptv) |
|------------------|-----------------------|------------------|---------------|-----------------|------------------|----------------|-------------------|-----------------|-----------------|------------------|----------------|-----------------|
| 8                | 161.97                | 0.76             | 0.44          | 0.19            | 1.71             | 1.88           | 6.09              | 1.05            | 3.68            | 5.62             | 5.24           | 7.68            |
| 11               | 157.06                | 0.55             | 0.62          | 0.08            | 1.44             | 1.54           | 5.34              | 0.90            | 3.65            | 4.89             | 4.88           | 6.91            |
| 14               | 148.40                | 0.40             | 1.21          | 0.12            | 1.71             | 2.05           | 6.77              | 1.13            | 4.74            | 5.40             | 7.01           | 8.85            |
| 17               | 127.64                | 0.32             | 2.87          | 0.25            | 1.71             | 1.80           | 7.70              | 1.28            | 5.81            | 6.34             | 8.31           | 10.45           |
| 20               | 109.56                | 0.24             | 2.54          | 0.31            | 1.53             | 1.32           | 6.48              | 0.90            | 6.77            | 7.09             | 7.01           | 9.97            |
| 23               | 98.56                 | 0.23             | 1.52          | 0.47            | 1.28             | 1.23           | 5.36              | 0.57            | 7.66            | 7.88             | 5.60           | 9.67            |
| 26               | 87.23                 | 0.27             | 1.09          | 0.70            | 1.65             | 1.02           | 4.62              | 0.43            | 8.45            | 8.69             | 4.80           | 9.93            |
| 29               | 78.45                 | 0.33             | 0.98          | 1.03            | 3.16             | 0.96           | 3.91              | 0.36            | 9.02            | 9.64             | 4.10           | 10.48           |
| 32               | 71.38                 | 0.42             | 0.95          | 1.45            | 5.47             | 0.97           | 3.29              | 0.37            | 9.89            | 11.43            | 3.50           | 11.95           |
| 35               | 64.88                 | 0.55             | 0.98          | 1.86            | 7.86             | 1.05           | 2.82              | 0.43            | 11.40           | 14.01            | 3.09           | 14.34           |
| 38               | 60.49                 | 0.68             | 1.05          | 2.19            | 9.92             | 1.14           | 2.48              | 0.50            | 13.14           | 16.65            | 2.83           | 16.89           |
| 41               | 57.76                 | 0.76             | 1.14          | 2.40            | 11.40            | 1.21           | 2.26              | 0.55            | 14.54           | 18.67            | 2.71           | 18.87           |

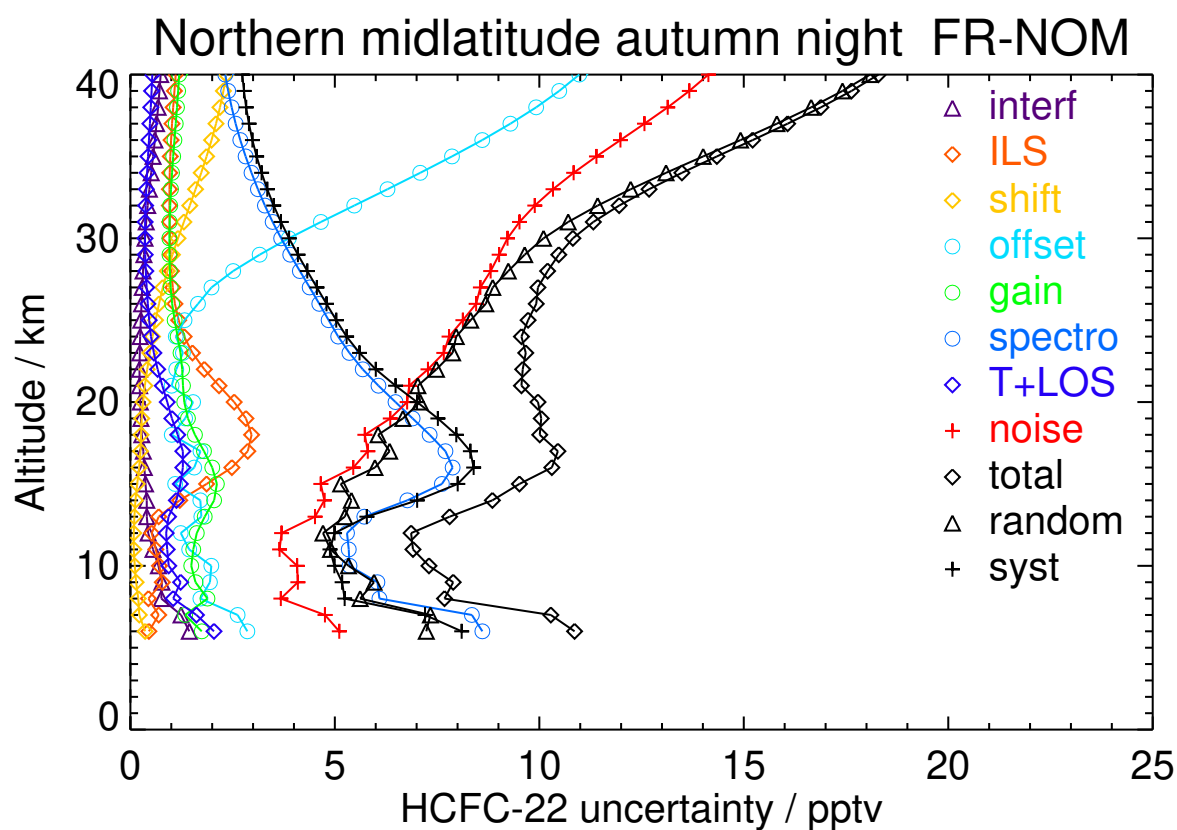

**Figure S16.** V8H\_F-22\_61 Northern midlatitude autumn night

**Table S18.** HCFC-22 error budget for Tropics day. All uncertainties are  $1\sigma$ .

| altitude<br>(km) | mean target<br>(pptv) | interf<br>(pptv) | ILS<br>(pptv) | shift<br>(pptv) | offset<br>(pptv) | gain<br>(pptv) | spectro<br>(pptv) | T+LOS<br>(pptv) | noise<br>(pptv) | random<br>(pptv) | syst<br>(pptv) | total<br>(pptv) |
|------------------|-----------------------|------------------|---------------|-----------------|------------------|----------------|-------------------|-----------------|-----------------|------------------|----------------|-----------------|
| 8                | 151.69                | 1.05             | 1.07          | 0.38            | 2.11             | 2.16           | 6.50              | 1.14            | 4.19            | 6.97             | 4.91           | 8.52            |
| 11               | 155.23                | 0.64             | 1.60          | 0.15            | 1.82             | 1.01           | 8.02              | 1.49            | 3.87            | 5.45             | 7.70           | 9.43            |
| 14               | 159.87                | 0.49             | 0.97          | 0.20            | 1.75             | 1.86           | 5.19              | 0.99            | 5.10            | 5.93             | 5.15           | 7.86            |
| 17               | 151.39                | 0.41             | 2.71          | 0.11            | 1.49             | 2.28           | 8.99              | 1.43            | 6.51            | 6.97             | 9.57           | 11.84           |
| 20               | 134.74                | 0.26             | 2.83          | 0.29            | 1.18             | 1.41           | 8.32              | 1.29            | 7.11            | 7.39             | 8.85           | 11.53           |
| 23               | 123.14                | 0.23             | 1.75          | 0.52            | 1.10             | 1.17           | 6.57              | 0.86            | 7.59            | 7.78             | 6.86           | 10.37           |
| 26               | 115.55                | 0.28             | 1.52          | 0.80            | 1.41             | 1.10           | 5.79              | 0.62            | 8.29            | 8.49             | 6.06           | 10.43           |
| 29               | 109.84                | 0.35             | 1.44          | 1.26            | 2.55             | 1.09           | 5.15              | 0.50            | 8.74            | 9.23             | 5.42           | 10.70           |
| 32               | 102.24                | 0.43             | 1.32          | 1.80            | 4.49             | 1.21           | 4.54              | 0.47            | 9.25            | 10.47            | 4.85           | 11.54           |
| 35               | 96.35                 | 0.58             | 1.25          | 2.34            | 6.67             | 1.39           | 4.02              | 0.51            | 10.41           | 12.62            | 4.38           | 13.36           |
| 38               | 90.75                 | 0.73             | 1.28          | 2.79            | 8.64             | 1.55           | 3.61              | 0.58            | 12.12           | 15.19            | 4.08           | 15.73           |
| 41               | 86.51                 | 0.84             | 1.37          | 3.08            | 10.11            | 1.66           | 3.32              | 0.63            | 13.60           | 17.27            | 3.89           | 17.71           |

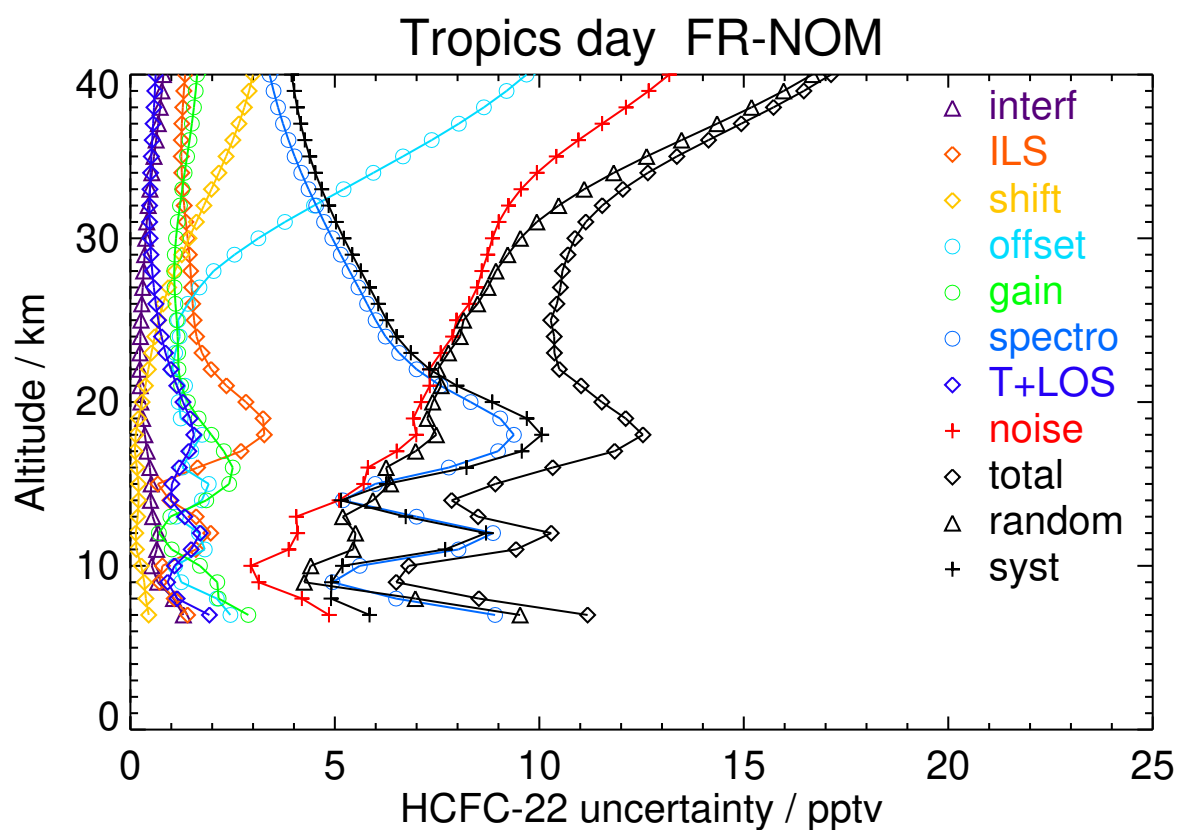

**Figure S17.** V8H\_F-22\_61 Tropics day

**Table S19.** HCFC-22 error budget for Tropics night. All uncertainties are  $1\sigma$ .

| altitude<br>(km) | mean target<br>(pptv) | interf<br>(pptv) | ILS<br>(pptv) | shift<br>(pptv) | offset<br>(pptv) | gain<br>(pptv) | spectro<br>(pptv) | T+LOS<br>(pptv) | noise<br>(pptv) | random<br>(pptv) | syst<br>(pptv) | total<br>(pptv) |
|------------------|-----------------------|------------------|---------------|-----------------|------------------|----------------|-------------------|-----------------|-----------------|------------------|----------------|-----------------|
| 8                | 149.26                | 0.94             | 0.65          | 0.33            | 1.89             | 1.21           | 5.15              | 0.77            | 3.89            | 5.33             | 4.50           | 6.97            |
| 11               | 151.14                | 0.77             | 0.96          | 0.11            | 2.20             | 1.13           | 6.50              | 1.12            | 4.41            | 5.91             | 5.96           | 8.40            |
| 14               | 162.58                | 0.52             | 1.03          | 0.23            | 2.23             | 1.87           | 5.22              | 1.05            | 5.49            | 6.41             | 5.23           | 8.27            |
| 17               | 151.77                | 0.40             | 2.62          | 0.12            | 1.80             | 1.89           | 8.25              | 1.25            | 6.66            | 7.25             | 8.68           | 11.31           |
| 20               | 137.28                | 0.27             | 2.55          | 0.29            | 1.29             | 1.43           | 8.58              | 1.28            | 7.25            | 7.52             | 9.03           | 11.75           |
| 23               | 126.63                | 0.24             | 1.66          | 0.54            | 1.15             | 1.21           | 6.85              | 0.90            | 7.70            | 7.90             | 7.10           | 10.62           |
| 26               | 120.59                | 0.29             | 1.56          | 0.81            | 1.39             | 1.09           | 6.02              | 0.67            | 8.33            | 8.54             | 6.28           | 10.60           |
| 29               | 113.47                | 0.36             | 1.44          | 1.28            | 2.51             | 1.08           | 5.36              | 0.54            | 8.76            | 9.24             | 5.62           | 10.82           |
| 32               | 105.73                | 0.45             | 1.22          | 1.86            | 4.46             | 1.24           | 4.74              | 0.49            | 9.27            | 10.49            | 5.02           | 11.63           |
| 35               | 98.32                 | 0.60             | 1.10          | 2.45            | 6.65             | 1.47           | 4.19              | 0.53            | 10.39           | 12.62            | 4.55           | 13.41           |
| 38               | 92.26                 | 0.75             | 1.13          | 2.93            | 8.65             | 1.66           | 3.77              | 0.59            | 12.07           | 15.18            | 4.23           | 15.76           |
| 41               | 88.18                 | 0.86             | 1.24          | 3.24            | 10.15            | 1.79           | 3.48              | 0.65            | 13.56           | 17.29            | 4.05           | 17.76           |

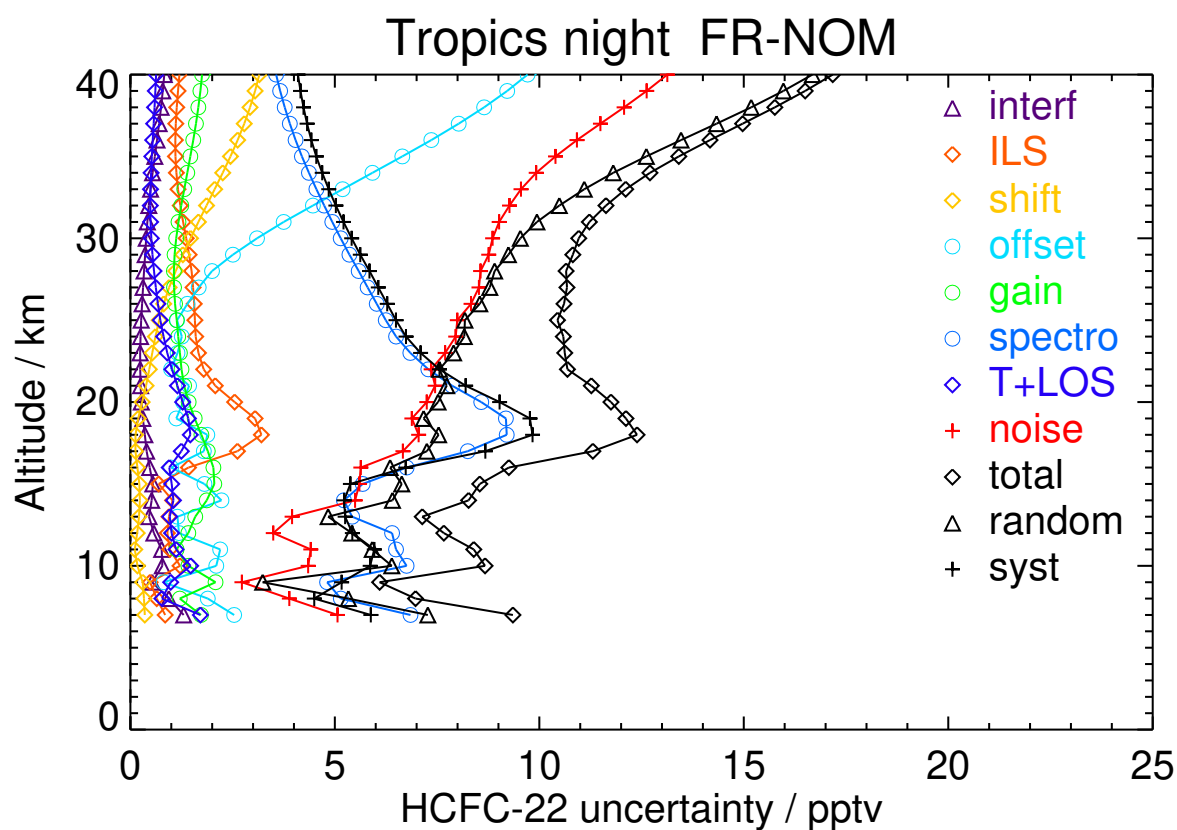

**Figure S18.** V8H\_F-22\_61 Tropics night

**Table S20.** HCFC-22 error budget for Southern midlatitude winter day. All uncertainties are  $1\sigma$ .

| altitude<br>(km) | mean target<br>(pptv) | interf<br>(pptv) | ILS<br>(pptv) | shift<br>(pptv) | offset<br>(pptv) | gain<br>(pptv) | spectro<br>(pptv) | T+LOS<br>(pptv) | noise<br>(pptv) | random<br>(pptv) | syst<br>(pptv) | total<br>(pptv) |
|------------------|-----------------------|------------------|---------------|-----------------|------------------|----------------|-------------------|-----------------|-----------------|------------------|----------------|-----------------|
| 5                | 144.62                | 1.39             | 0.64          | 0.31            | 2.57             | 2.50           | 8.89              | 2.38            | 5.13            | 8.75             | 7.05           | 11.24           |
| 8                | 148.71                | 0.43             | 0.35          | 0.17            | 0.87             | 1.84           | 5.06              | 1.26            | 3.06            | 4.09             | 4.93           | 6.41            |
| 11               | 148.73                | 0.51             | 0.57          | 0.06            | 1.38             | 1.90           | 6.09              | 1.19            | 4.14            | 5.96             | 5.13           | 7.86            |
| 14               | 135.44                | 0.38             | 1.65          | 0.10            | 1.49             | 2.16           | 7.81              | 1.42            | 4.99            | 5.57             | 8.16           | 9.88            |
| 17               | 121.62                | 0.32             | 2.40          | 0.22            | 1.48             | 1.65           | 7.08              | 1.16            | 5.99            | 6.43             | 7.55           | 9.91            |
| 20               | 105.37                | 0.25             | 1.95          | 0.35            | 1.41             | 1.35           | 6.12              | 0.84            | 7.11            | 7.39             | 6.47           | 9.82            |
| 23               | 97.15                 | 0.24             | 1.08          | 0.46            | 1.49             | 1.13           | 5.11              | 0.55            | 8.21            | 8.44             | 5.26           | 9.94            |
| 26               | 90.52                 | 0.29             | 0.83          | 0.63            | 2.51             | 1.04           | 4.61              | 0.42            | 9.14            | 9.55             | 4.72           | 10.66           |
| 29               | 84.56                 | 0.35             | 0.86          | 0.95            | 4.67             | 1.02           | 4.14              | 0.39            | 10.08           | 11.19            | 4.29           | 11.98           |
| 32               | 76.49                 | 0.46             | 0.98          | 1.37            | 7.26             | 1.05           | 3.66              | 0.45            | 11.56           | 13.75            | 3.87           | 14.28           |
| 35               | 68.78                 | 0.60             | 1.13          | 1.76            | 9.56             | 1.11           | 3.25              | 0.54            | 13.37           | 16.57            | 3.53           | 16.94           |
| 38               | 63.14                 | 0.72             | 1.29          | 2.07            | 11.36            | 1.17           | 2.93              | 0.62            | 15.00           | 18.98            | 3.31           | 19.26           |
| 41               | 61.35                 | 0.81             | 1.46          | 2.39            | 12.31            | 1.23           | 2.74              | 0.70            | 15.95           | 20.33            | 3.23           | 20.59           |

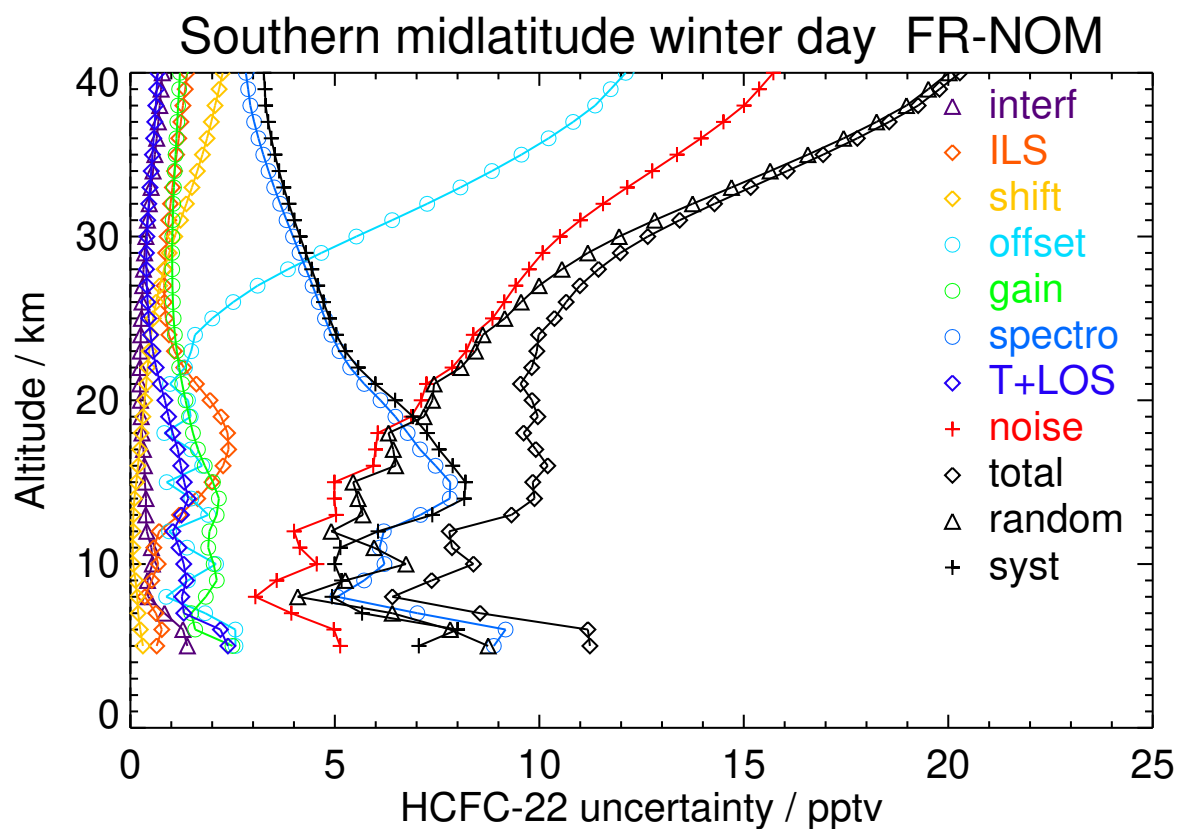

**Figure S19.** V8H\_F-22\_61 Southern midlatitude winter day

**Table S21.** HCFC-22 error budget for Southern midlatitude winter night. All uncertainties are  $1\sigma$ .

| altitude<br>(km) | mean target<br>(pptv) | interf<br>(pptv) | ILS<br>(pptv) | shift<br>(pptv) | offset<br>(pptv) | gain<br>(pptv) | spectro<br>(pptv) | T+LOS<br>(pptv) | noise<br>(pptv) | random<br>(pptv) | syst<br>(pptv) | total<br>(pptv) |
|------------------|-----------------------|------------------|---------------|-----------------|------------------|----------------|-------------------|-----------------|-----------------|------------------|----------------|-----------------|
| 5                | 148.29                | 1.46             | 0.57          | 0.27            | 2.63             | 2.05           | 9.98              | 3.11            | 5.12            | 7.50             | 9.63           | 12.21           |
| 8                | 149.87                | 0.44             | 0.26          | 0.18            | 0.94             | 2.07           | 4.72              | 1.40            | 3.19            | 3.99             | 4.89           | 6.32            |
| 11               | 151.99                | 0.55             | 0.70          | 0.07            | 1.14             | 1.50           | 5.53              | 1.16            | 4.04            | 5.58             | 4.63           | 7.25            |
| 14               | 137.55                | 0.39             | 1.56          | 0.12            | 1.31             | 2.07           | 7.55              | 1.46            | 5.01            | 5.50             | 7.91           | 9.64            |
| 17               | 123.13                | 0.32             | 2.39          | 0.24            | 1.33             | 1.46           | 6.91              | 1.21            | 6.04            | 6.38             | 7.40           | 9.77            |
| 20               | 106.88                | 0.24             | 2.12          | 0.33            | 1.28             | 1.17           | 6.27              | 0.88            | 7.16            | 7.40             | 6.64           | 9.95            |
| 23               | 94.43                 | 0.24             | 1.22          | 0.45            | 1.39             | 1.01           | 5.12              | 0.57            | 8.24            | 8.43             | 5.31           | 9.96            |
| 26               | 87.04                 | 0.29             | 0.92          | 0.68            | 2.33             | 0.97           | 4.45              | 0.41            | 9.10            | 9.45             | 4.59           | 10.51           |
| 29               | 83.03                 | 0.36             | 0.93          | 1.06            | 4.29             | 0.98           | 3.96              | 0.37            | 9.92            | 10.90            | 4.11           | 11.65           |
| 32               | 77.62                 | 0.48             | 1.03          | 1.52            | 6.76             | 1.02           | 3.54              | 0.41            | 11.26           | 13.27            | 3.73           | 13.78           |
| 35               | 72.50                 | 0.61             | 1.16          | 1.92            | 9.05             | 1.07           | 3.19              | 0.49            | 13.02           | 16.02            | 3.44           | 16.38           |
| 38               | 68.32                 | 0.72             | 1.30          | 2.22            | 10.88            | 1.13           | 2.91              | 0.55            | 14.70           | 18.47            | 3.24           | 18.76           |
| 41               | 65.08                 | 0.79             | 1.43          | 2.42            | 12.11            | 1.15           | 2.68              | 0.60            | 15.89           | 20.17            | 3.10           | 20.41           |

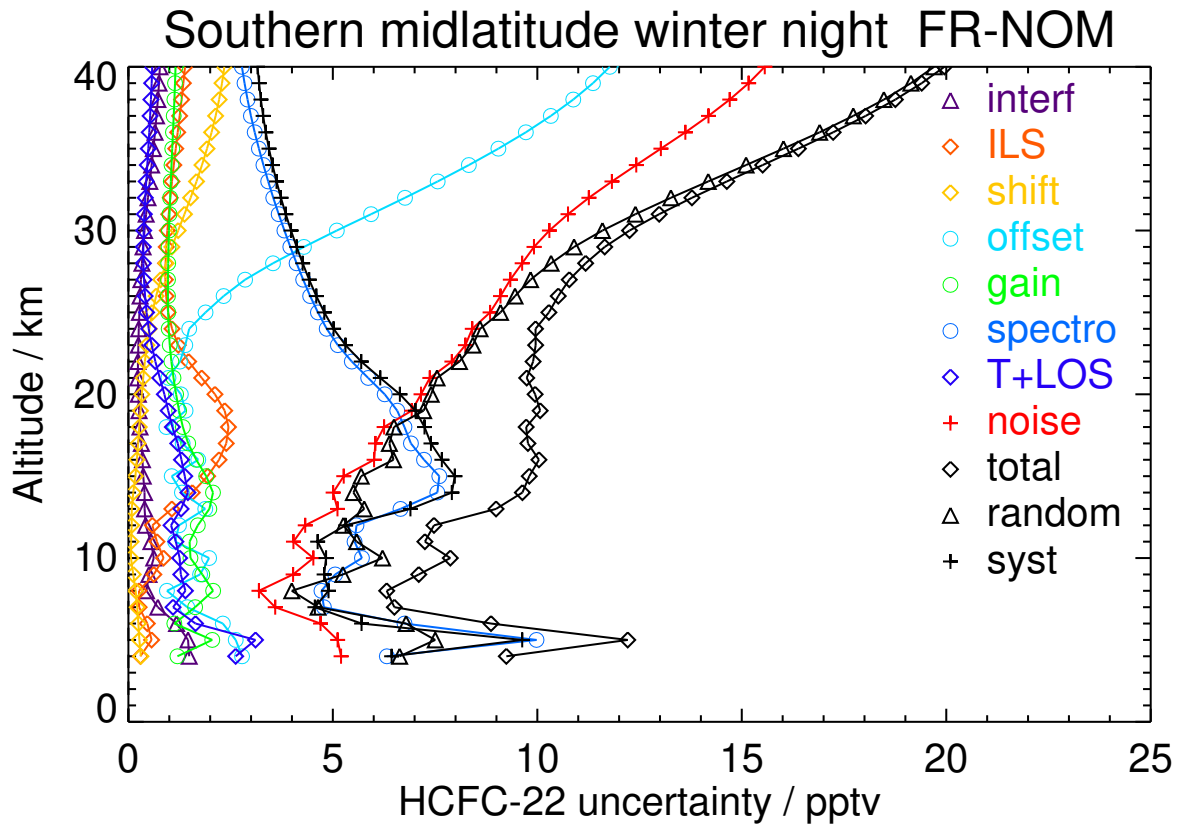

**Figure S20.** V8H\_F-22\_61 Southern midlatitude winter night

**Table S22.** HCFC-22 error budget for Southern midlatitude spring day. All uncertainties are  $1\sigma$ .

| altitude<br>(km) | mean target<br>(pptv) | interf<br>(pptv) | ILS<br>(pptv) | shift<br>(pptv) | offset<br>(pptv) | gain<br>(pptv) | spectro<br>(pptv) | T+LOS<br>(pptv) | noise<br>(pptv) | random<br>(pptv) | syst<br>(pptv) | total<br>(pptv) |
|------------------|-----------------------|------------------|---------------|-----------------|------------------|----------------|-------------------|-----------------|-----------------|------------------|----------------|-----------------|
| 8                | 151.23                | 0.59             | 0.59          | 0.12            | 1.38             | 1.63           | 5.13              | 1.00            | 3.42            | 4.59             | 4.82           | 6.66            |
| 11               | 144.78                | 0.50             | 0.82          | 0.08            | 1.87             | 1.91           | 5.84              | 1.23            | 4.46            | 5.92             | 5.34           | 7.97            |
| 14               | 133.10                | 0.37             | 2.00          | 0.13            | 1.85             | 1.74           | 7.43              | 1.38            | 5.15            | 5.96             | 7.67           | 9.71            |
| 17               | 115.39                | 0.31             | 2.88          | 0.21            | 1.77             | 1.32           | 6.95              | 1.14            | 6.00            | 6.65             | 7.40           | 9.95            |
| 20               | 99.93                 | 0.24             | 2.33          | 0.38            | 1.48             | 1.05           | 5.63              | 0.78            | 6.85            | 7.24             | 5.98           | 9.39            |
| 23               | 94.37                 | 0.24             | 1.31          | 0.55            | 1.20             | 1.03           | 4.54              | 0.47            | 7.61            | 7.84             | 4.67           | 9.13            |
| 26               | 89.47                 | 0.29             | 1.18          | 0.85            | 1.35             | 1.14           | 4.27              | 0.38            | 8.28            | 8.57             | 4.34           | 9.61            |
| 29               | 83.21                 | 0.35             | 1.17          | 1.32            | 2.44             | 1.01           | 4.05              | 0.38            | 8.72            | 9.28             | 4.08           | 10.14           |
| 32               | 74.71                 | 0.45             | 1.10          | 1.87            | 4.43             | 0.99           | 3.69              | 0.42            | 9.29            | 10.57            | 3.74           | 11.21           |
| 35               | 68.32                 | 0.59             | 1.07          | 2.42            | 6.71             | 1.08           | 3.31              | 0.48            | 10.55           | 12.82            | 3.42           | 13.26           |
| 38               | 64.12                 | 0.74             | 1.11          | 2.85            | 8.80             | 1.21           | 2.97              | 0.56            | 12.25           | 15.42            | 3.19           | 15.75           |
| 41               | 61.50                 | 0.84             | 1.21          | 3.14            | 10.38            | 1.31           | 2.72              | 0.62            | 13.74           | 17.57            | 3.06           | 17.84           |

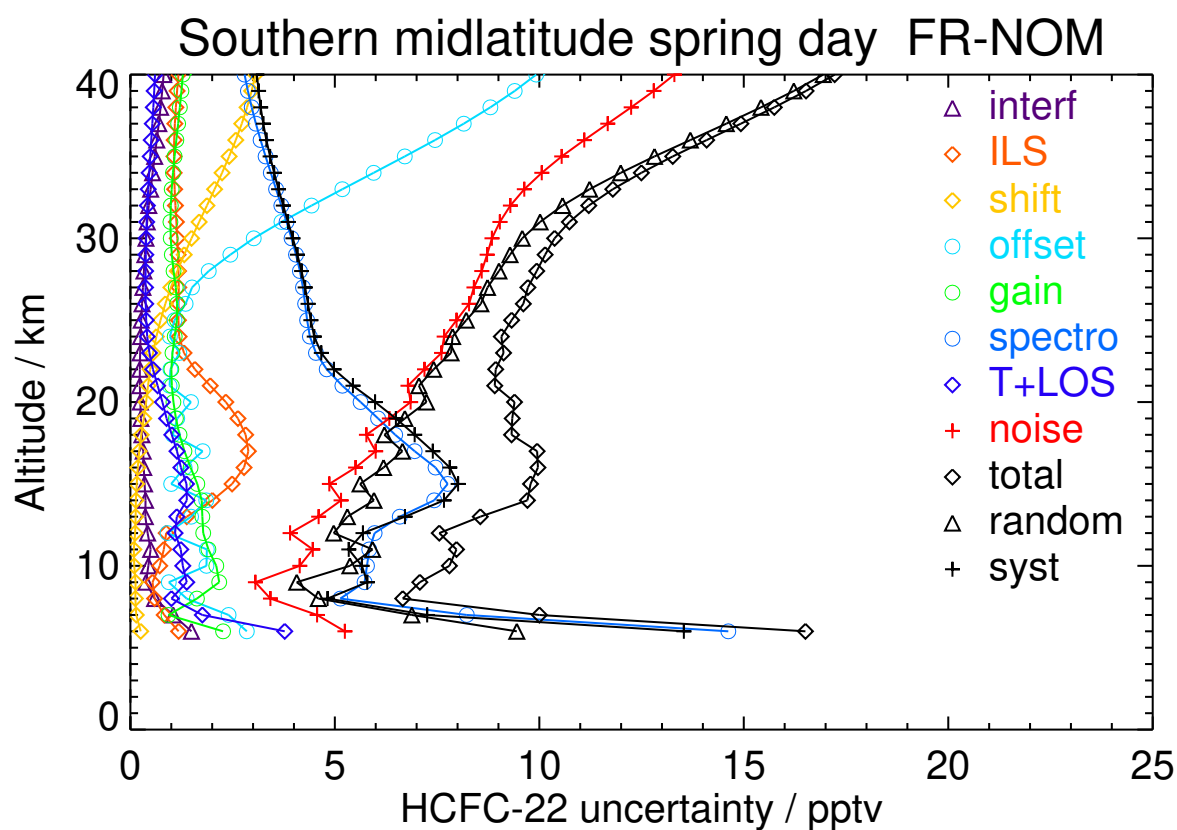

**Figure S21.** V8H\_F-22\_61 Southern midlatitude spring day

**Table S23.** HCFC-22 error budget for Southern midlatitude spring night. All uncertainties are  $1\sigma$ .

| altitude<br>(km) | mean target<br>(pptv) | interf<br>(pptv) | ILS<br>(pptv) | shift<br>(pptv) | offset<br>(pptv) | gain<br>(pptv) | spectro<br>(pptv) | T+LOS<br>(pptv) | noise<br>(pptv) | random<br>(pptv) | syst<br>(pptv) | total<br>(pptv) |
|------------------|-----------------------|------------------|---------------|-----------------|------------------|----------------|-------------------|-----------------|-----------------|------------------|----------------|-----------------|
| 8                | 153.18                | 0.48             | 0.32          | 0.15            | 1.11             | 1.71           | 4.91              | 1.16            | 3.05            | 3.91             | 4.90           | 6.26            |
| 11               | 145.27                | 0.49             | 0.64          | 0.08            | 1.75             | 1.79           | 5.73              | 1.16            | 4.19            | 5.73             | 5.09           | 7.66            |
| 14               | 135.36                | 0.36             | 1.79          | 0.11            | 1.85             | 2.08           | 7.19              | 1.27            | 4.98            | 5.77             | 7.47           | 9.44            |
| 17               | 118.22                | 0.30             | 2.78          | 0.21            | 1.78             | 1.58           | 6.38              | 1.07            | 5.80            | 6.26             | 7.05           | 9.43            |
| 20               | 108.29                | 0.24             | 2.23          | 0.42            | 1.58             | 1.27           | 5.38              | 0.69            | 6.61            | 6.95             | 5.85           | 9.08            |
| 23               | 103.60                | 0.23             | 1.19          | 0.58            | 1.21             | 1.08           | 4.57              | 0.42            | 7.34            | 7.52             | 4.78           | 8.91            |
| 26               | 102.79                | 0.27             | 1.02          | 0.83            | 1.28             | 1.04           | 4.43              | 0.33            | 8.08            | 8.27             | 4.61           | 9.46            |
| 29               | 100.52                | 0.34             | 1.09          | 1.16            | 2.48             | 1.08           | 4.34              | 0.32            | 8.67            | 9.12             | 4.57           | 10.20           |
| 32               | 90.26                 | 0.41             | 1.09          | 1.56            | 4.59             | 1.14           | 4.04              | 0.35            | 9.41            | 10.61            | 4.31           | 11.45           |
| 35               | 81.16                 | 0.54             | 1.12          | 2.00            | 6.96             | 1.24           | 3.64              | 0.43            | 10.77           | 13.00            | 3.97           | 13.59           |
| 38               | 74.01                 | 0.69             | 1.22          | 2.39            | 9.10             | 1.34           | 3.28              | 0.52            | 12.49           | 15.67            | 3.70           | 16.10           |
| 41               | 68.86                 | 0.80             | 1.36          | 2.66            | 10.70            | 1.43           | 3.02              | 0.59            | 13.98           | 17.84            | 3.55           | 18.19           |

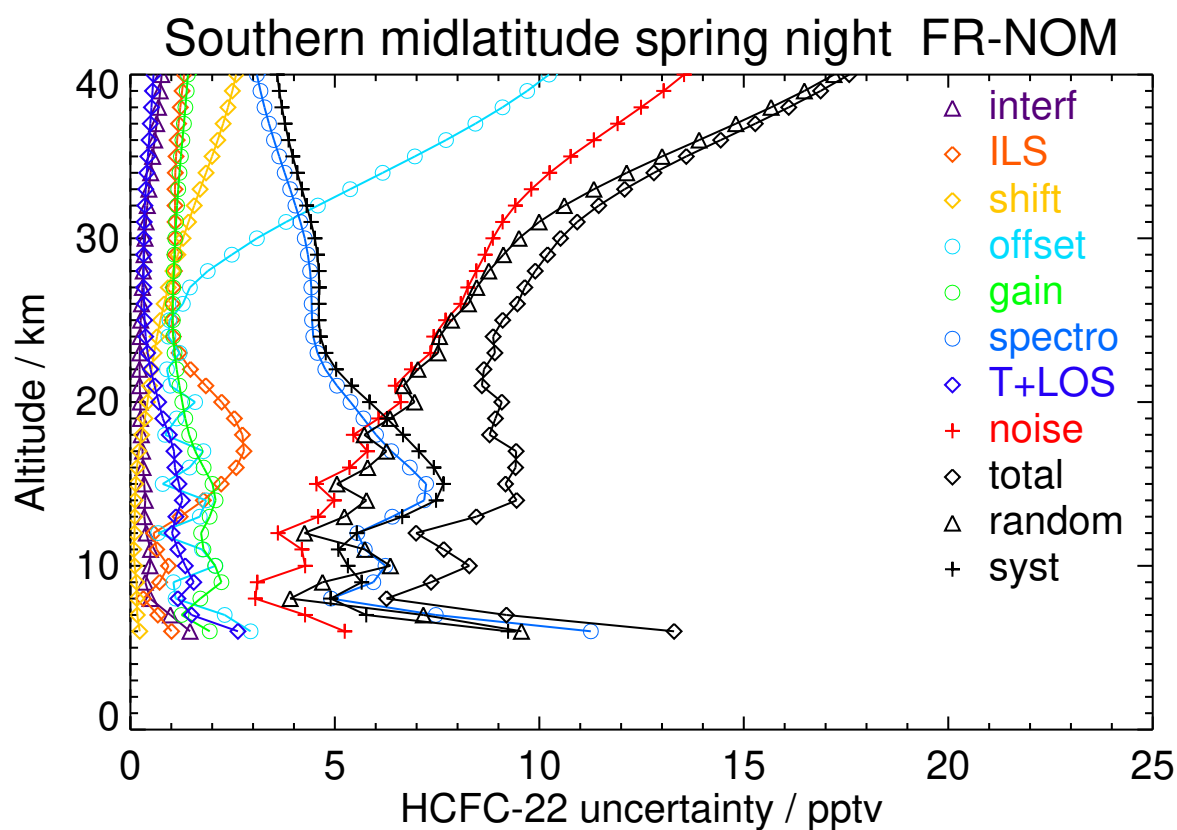

**Figure S22.** V8H\_F-22\_61 Southern midlatitude spring night

**Table S24.** HCFC-22 error budget for Southern midlatitude summer day. All uncertainties are  $1\sigma$ .

| altitude<br>(km) | mean target<br>(pptv) | interf<br>(pptv) | ILS<br>(pptv) | shift<br>(pptv) | offset<br>(pptv) | gain<br>(pptv) | spectro<br>(pptv) | T+LOS<br>(pptv) | noise<br>(pptv) | random<br>(pptv) | syst<br>(pptv) | total<br>(pptv) |
|------------------|-----------------------|------------------|---------------|-----------------|------------------|----------------|-------------------|-----------------|-----------------|------------------|----------------|-----------------|
| 5                | 142.33                | 1.72             | 0.74          | 0.43            | 2.59             | 1.42           | 8.00              | 2.66            | 5.24            | 7.31             | 7.58           | 10.53           |
| 8                | 149.17                | 0.49             | 0.43          | 0.20            | 0.84             | 1.90           | 4.73              | 1.27            | 2.94            | 3.67             | 4.89           | 6.12            |
| 11               | 145.90                | 0.64             | 1.10          | 0.08            | 1.19             | 0.70           | 6.92              | 1.32            | 3.88            | 5.16             | 6.45           | 8.26            |
| 14               | 135.07                | 0.41             | 1.45          | 0.10            | 1.27             | 2.12           | 7.48              | 1.24            | 4.75            | 5.28             | 7.78           | 9.41            |
| 17               | 121.62                | 0.31             | 2.87          | 0.20            | 1.31             | 1.33           | 6.66              | 1.12            | 5.69            | 6.02             | 7.32           | 9.47            |
| 20               | 104.09                | 0.24             | 2.59          | 0.29            | 1.20             | 0.99           | 5.95              | 0.82            | 6.66            | 6.91             | 6.48           | 9.47            |
| 23               | 94.06                 | 0.23             | 1.37          | 0.47            | 1.02             | 0.93           | 4.76              | 0.48            | 7.50            | 7.64             | 4.98           | 9.12            |
| 26               | 88.08                 | 0.28             | 1.18          | 0.81            | 1.15             | 0.97           | 4.17              | 0.37            | 8.20            | 8.36             | 4.40           | 9.44            |
| 29               | 80.92                 | 0.34             | 1.13          | 1.35            | 2.08             | 0.92           | 3.69              | 0.36            | 8.69            | 9.06             | 3.94           | 9.88            |
| 32               | 74.41                 | 0.46             | 1.01          | 2.04            | 3.77             | 0.98           | 3.21              | 0.41            | 9.17            | 10.15            | 3.48           | 10.73           |
| 35               | 68.79                 | 0.62             | 0.89          | 2.74            | 5.74             | 1.14           | 2.80              | 0.49            | 10.17           | 12.03            | 3.11           | 12.43           |
| 38               | 64.31                 | 0.78             | 0.87          | 3.33            | 7.64             | 1.30           | 2.49              | 0.58            | 11.75           | 14.45            | 2.89           | 14.73           |
| 41               | 60.91                 | 0.91             | 0.95          | 3.74            | 9.13             | 1.42           | 2.26              | 0.66            | 13.25           | 16.57            | 2.77           | 16.80           |

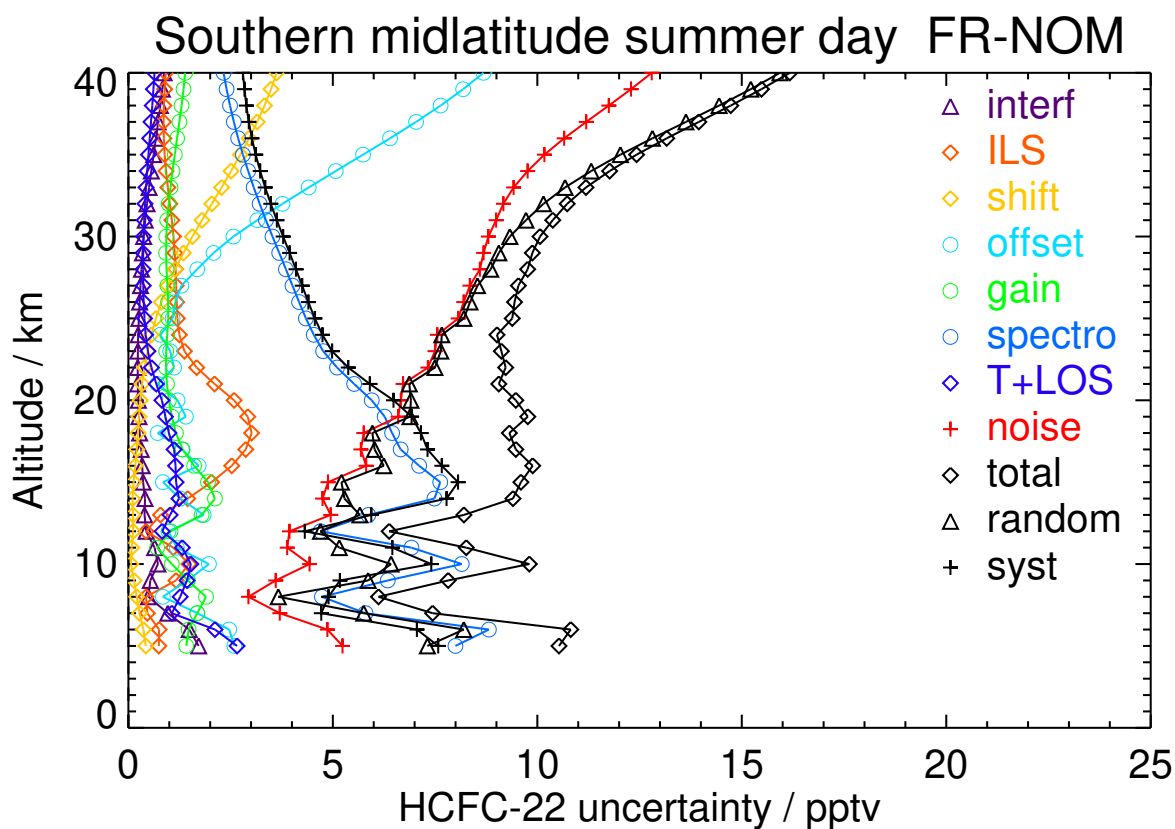

**Figure S23.** V8H\_F-22\_61 Southern midlatitude summer day

**Table S25.** HCFC-22 error budget for Southern midlatitude summer night. All uncertainties are  $1\sigma$ .

| altitude<br>(km) | mean target<br>(pptv) | interf<br>(pptv) | ILS<br>(pptv) | shift<br>(pptv) | offset<br>(pptv) | gain<br>(pptv) | spectro<br>(pptv) | T+LOS<br>(pptv) | noise<br>(pptv) | random<br>(pptv) | syst<br>(pptv) | total<br>(pptv) |
|------------------|-----------------------|------------------|---------------|-----------------|------------------|----------------|-------------------|-----------------|-----------------|------------------|----------------|-----------------|
| 5                | 146.23                | 1.67             | 0.65          | 0.40            | 2.74             | 1.78           | 7.05              | 2.26            | 5.32            | 8.31             | 5.28           | 9.85            |
| 8                | 145.18                | 0.93             | 1.30          | 0.15            | 2.03             | 1.32           | 7.25              | 1.67            | 4.51            | 7.13             | 5.76           | 9.17            |
| 11               | 147.55                | 0.49             | 1.32          | 0.07            | 1.07             | 1.38           | 5.87              | 1.12            | 3.54            | 5.46             | 4.84           | 7.30            |
| 14               | 140.85                | 0.43             | 1.49          | 0.12            | 1.00             | 1.88           | 6.73              | 1.01            | 4.52            | 5.85             | 6.29           | 8.59            |
| 17               | 123.83                | 0.32             | 3.56          | 0.23            | 1.08             | 1.59           | 8.21              | 1.27            | 5.60            | 6.07             | 8.94           | 10.81           |
| 20               | 103.06                | 0.25             | 2.56          | 0.29            | 1.10             | 1.14           | 6.29              | 0.86            | 6.58            | 6.85             | 6.78           | 9.64            |
| 23               | 92.69                 | 0.23             | 1.23          | 0.48            | 0.97             | 0.98           | 4.66              | 0.48            | 7.47            | 7.60             | 4.87           | 9.03            |
| 26               | 89.26                 | 0.27             | 1.09          | 0.79            | 1.14             | 0.89           | 4.08              | 0.37            | 8.20            | 8.35             | 4.27           | 9.38            |
| 29               | 81.79                 | 0.34             | 1.11          | 1.32            | 2.06             | 0.87           | 3.61              | 0.37            | 8.70            | 9.07             | 3.85           | 9.85            |
| 32               | 74.22                 | 0.45             | 1.02          | 2.05            | 3.70             | 0.97           | 3.09              | 0.40            | 9.13            | 10.09            | 3.36           | 10.64           |
| 35               | 69.56                 | 0.62             | 0.93          | 2.80            | 5.65             | 1.15           | 2.67              | 0.47            | 10.07           | 11.92            | 3.01           | 12.29           |
| 38               | 66.26                 | 0.79             | 0.96          | 3.43            | 7.54             | 1.35           | 2.38              | 0.55            | 11.59           | 14.29            | 2.85           | 14.57           |
| 41               | 63.69                 | 0.92             | 1.09          | 3.88            | 9.03             | 1.50           | 2.20              | 0.61            | 13.09           | 16.41            | 2.80           | 16.65           |

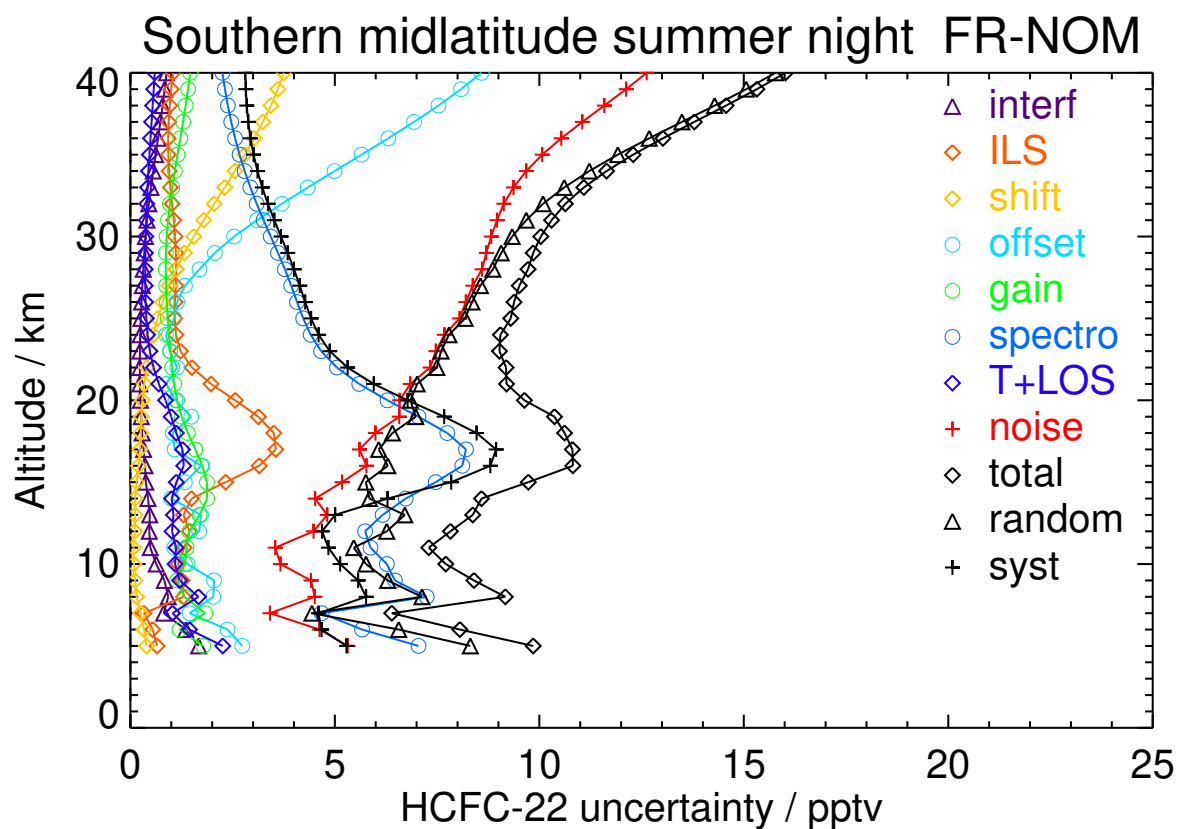

**Figure S24.** V8H\_F-22\_61 Southern midlatitude summer night

**Table S26.** HCFC-22 error budget for Southern midlatitude autumn day. All uncertainties are  $1\sigma$ .

| altitude<br>(km) | mean target<br>(pptv) | interf<br>(pptv) | ILS<br>(pptv) | shift<br>(pptv) | offset<br>(pptv) | gain<br>(pptv) | spectro<br>(pptv) | T+LOS<br>(pptv) | noise<br>(pptv) | random<br>(pptv) | syst<br>(pptv) | total<br>(pptv) |
|------------------|-----------------------|------------------|---------------|-----------------|------------------|----------------|-------------------|-----------------|-----------------|------------------|----------------|-----------------|
| 5                | 152.70                | 1.34             | 0.17          | 0.30            | 2.47             | 1.50           | 8.86              | 2.57            | 4.36            | 5.81             | 8.98           | 10.69           |
| 8                | 143.39                | 0.99             | 0.90          | 0.14            | 2.35             | 1.00           | 6.93              | 1.21            | 4.29            | 6.48             | 5.84           | 8.73            |
| 11               | 150.09                | 0.47             | 1.29          | 0.10            | 1.98             | 1.62           | 6.22              | 1.17            | 4.14            | 6.59             | 4.72           | 8.10            |
| 14               | 140.09                | 0.36             | 1.57          | 0.10            | 1.63             | 1.79           | 6.73              | 1.08            | 4.69            | 5.31             | 6.98           | 8.77            |
| 17               | 123.97                | 0.30             | 2.89          | 0.32            | 1.31             | 1.71           | 7.92              | 1.10            | 5.58            | 5.99             | 8.51           | 10.40           |
| 20               | 104.60                | 0.24             | 1.79          | 0.35            | 1.09             | 1.54           | 6.20              | 0.73            | 6.51            | 6.76             | 6.53           | 9.39            |
| 23               | 91.80                 | 0.23             | 1.09          | 0.55            | 1.00             | 1.33           | 4.84              | 0.46            | 7.48            | 7.63             | 5.06           | 9.16            |
| 26               | 84.77                 | 0.27             | 1.03          | 0.75            | 1.63             | 1.07           | 4.16              | 0.35            | 8.31            | 8.54             | 4.37           | 9.59            |
| 29               | 80.70                 | 0.33             | 0.97          | 1.02            | 3.31             | 0.98           | 3.75              | 0.31            | 9.01            | 9.69             | 3.94           | 10.46           |
| 32               | 74.41                 | 0.42             | 0.87          | 1.39            | 5.74             | 1.02           | 3.32              | 0.33            | 10.06           | 11.69            | 3.52           | 12.21           |
| 35               | 68.43                 | 0.54             | 0.82          | 1.74            | 8.17             | 1.13           | 2.94              | 0.38            | 11.74           | 14.44            | 3.18           | 14.79           |
| 38               | 63.95                 | 0.65             | 0.85          | 2.01            | 10.20            | 1.25           | 2.64              | 0.44            | 13.54           | 17.10            | 2.95           | 17.35           |
| 41               | 61.38                 | 0.72             | 0.91          | 2.17            | 11.58            | 1.33           | 2.44              | 0.48            | 14.86           | 19.00            | 2.83           | 19.21           |

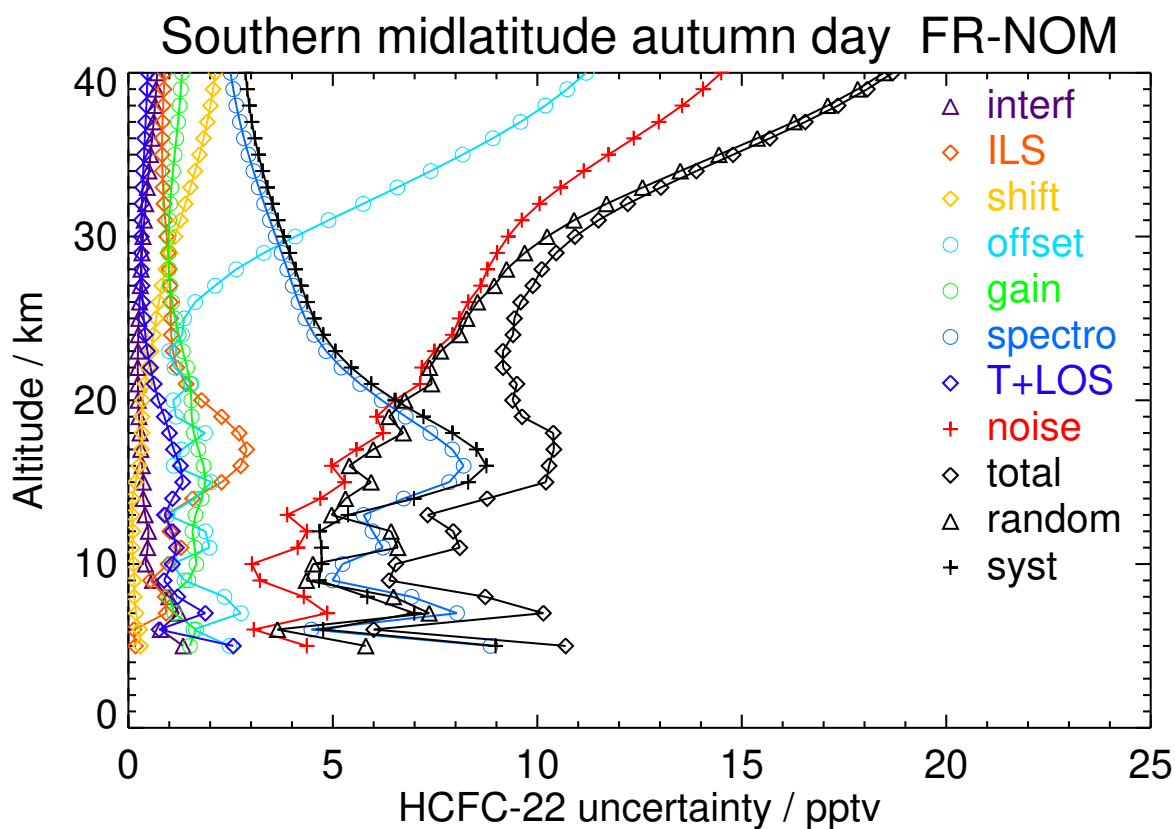

**Figure S25.** V8H\_F-22\_61 Southern midlatitude autumn day

**Table S27.** HCFC-22 error budget for Southern midlatitude autumn night. All uncertainties are  $1\sigma$ .

| altitude<br>(km) | mean target<br>(pptv) | interf<br>(pptv) | ILS<br>(pptv) | shift<br>(pptv) | offset<br>(pptv) | gain<br>(pptv) | spectro<br>(pptv) | T+LOS<br>(pptv) | noise<br>(pptv) | random<br>(pptv) | syst<br>(pptv) | total<br>(pptv) |
|------------------|-----------------------|------------------|---------------|-----------------|------------------|----------------|-------------------|-----------------|-----------------|------------------|----------------|-----------------|
| 8                | 144.80                | 0.80             | 0.58          | 0.18            | 1.91             | 1.14           | 5.02              | 0.74            | 3.70            | 5.05             | 4.45           | 6.73            |
| 11               | 151.95                | 0.63             | 1.79          | 0.13            | 2.30             | 1.28           | 7.01              | 1.34            | 4.50            | 6.84             | 5.91           | 9.04            |
| 14               | 145.19                | 0.37             | 1.72          | 0.12            | 2.02             | 1.78           | 6.89              | 1.16            | 5.04            | 5.76             | 7.17           | 9.20            |
| 17               | 124.09                | 0.31             | 3.04          | 0.32            | 1.62             | 1.66           | 8.69              | 1.18            | 5.84            | 6.34             | 9.26           | 11.22           |
| 20               | 105.38                | 0.24             | 1.67          | 0.31            | 1.21             | 1.41           | 6.14              | 0.74            | 6.63            | 6.87             | 6.43           | 9.41            |
| 23               | 95.56                 | 0.23             | 1.02          | 0.52            | 1.02             | 1.28           | 4.89              | 0.47            | 7.53            | 7.69             | 5.08           | 9.22            |
| 26               | 88.92                 | 0.27             | 1.01          | 0.72            | 1.58             | 1.02           | 4.39              | 0.37            | 8.35            | 8.56             | 4.58           | 9.71            |
| 29               | 81.50                 | 0.33             | 0.98          | 1.06            | 3.14             | 0.93           | 3.92              | 0.34            | 8.96            | 9.58             | 4.12           | 10.43           |
| 32               | 72.67                 | 0.43             | 0.90          | 1.48            | 5.47             | 0.98           | 3.43              | 0.36            | 9.90            | 11.43            | 3.64           | 12.00           |
| 35               | 65.80                 | 0.56             | 0.86          | 1.89            | 7.86             | 1.10           | 3.01              | 0.41            | 11.47           | 14.06            | 3.26           | 14.44           |
| 38               | 61.44                 | 0.68             | 0.91          | 2.22            | 9.89             | 1.22           | 2.70              | 0.48            | 13.23           | 16.71            | 3.02           | 16.98           |
| 41               | 58.79                 | 0.77             | 0.99          | 2.43            | 11.32            | 1.31           | 2.49              | 0.53            | 14.60           | 18.67            | 2.88           | 18.89           |

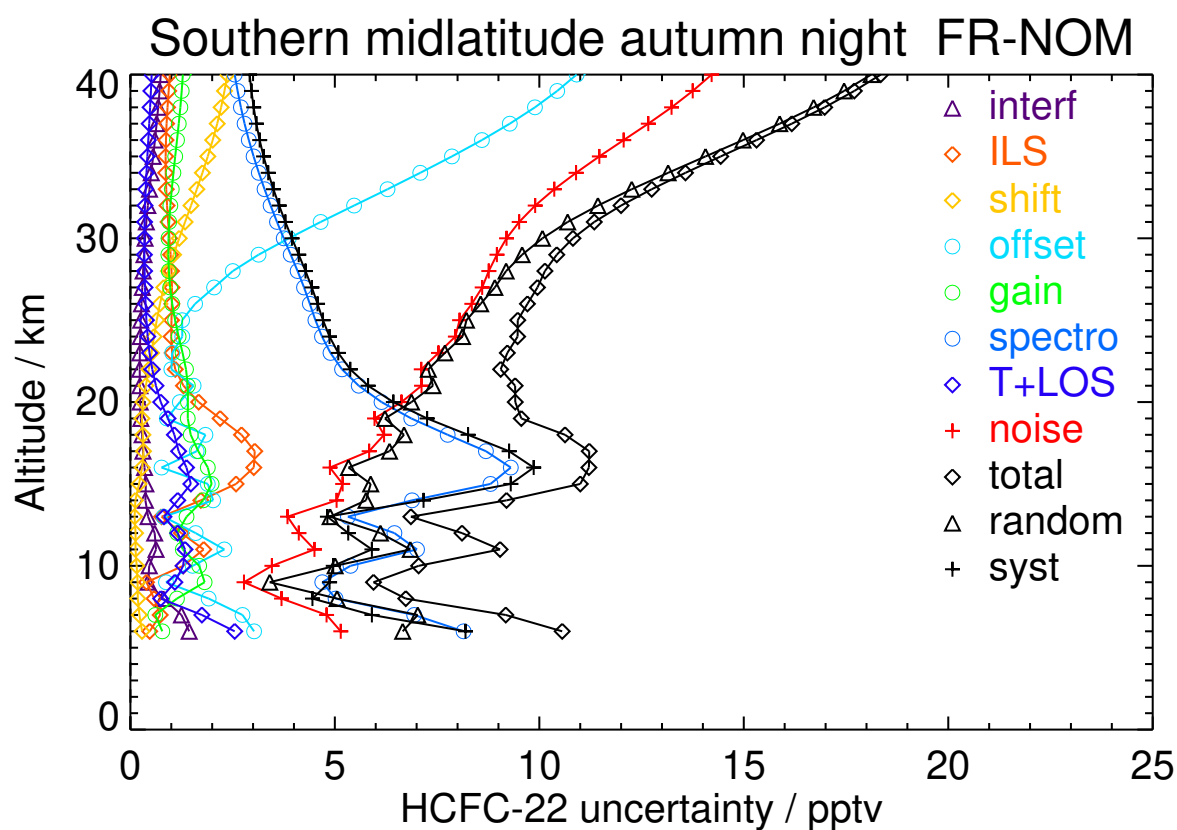

**Figure S26.** V8H\_F-22\_61 Southern midlatitude autumn night

**Table S28.** HCFC-22 error budget for Southern polar winter day. All uncertainties are  $1\sigma$ .

| altitude<br>(km) | mean target<br>(pptv) | interf<br>(pptv) | ILS<br>(pptv) | shift<br>(pptv) | offset<br>(pptv) | gain<br>(pptv) | spectro<br>(pptv) | T+LOS<br>(pptv) | noise<br>(pptv) | random<br>(pptv) | syst<br>(pptv) | total<br>(pptv) |
|------------------|-----------------------|------------------|---------------|-----------------|------------------|----------------|-------------------|-----------------|-----------------|------------------|----------------|-----------------|
| 5                | 143.10                | 1.44             | 1.45          | 0.34            | 2.97             | 1.38           | 15.99             | 4.22            | 5.60            | 7.76             | 16.11          | 17.88           |
| 8                | 151.49                | 0.64             | 0.96          | 0.10            | 2.61             | 2.16           | 7.12              | 1.68            | 5.30            | 6.88             | 6.86           | 9.72            |
| 11               | 141.32                | 0.49             | 1.54          | 0.10            | 1.21             | 1.60           | 7.89              | 1.92            | 4.35            | 5.25             | 8.00           | 9.57            |
| 14               | 120.58                | 0.46             | 2.17          | 0.13            | 1.42             | 1.42           | 9.24              | 2.22            | 5.76            | 6.47             | 9.52           | 11.51           |
| 17               | 95.62                 | 0.36             | 2.04          | 0.16            | 1.58             | 1.06           | 7.66              | 1.63            | 7.33            | 7.74             | 7.94           | 11.09           |
| 20               | 78.81                 | 0.27             | 1.56          | 0.19            | 1.62             | 0.80           | 6.09              | 1.14            | 8.71            | 8.97             | 6.29           | 10.95           |
| 23               | 62.77                 | 0.28             | 1.00          | 0.34            | 2.54             | 0.62           | 4.51              | 0.78            | 9.85            | 10.23            | 4.61           | 11.22           |
| 26               | 48.65                 | 0.31             | 0.74          | 0.69            | 4.30             | 0.54           | 3.17              | 0.53            | 10.63           | 11.52            | 3.23           | 11.97           |
| 29               | 39.48                 | 0.41             | 0.73          | 1.23            | 6.69             | 0.55           | 2.19              | 0.48            | 11.57           | 13.45            | 2.27           | 13.64           |
| 32               | 34.17                 | 0.57             | 0.89          | 1.81            | 9.23             | 0.61           | 1.62              | 0.58            | 13.18           | 16.23            | 1.80           | 16.33           |
| 35               | 30.57                 | 0.73             | 1.10          | 2.29            | 11.36            | 0.69           | 1.32              | 0.71            | 14.96           | 18.96            | 1.68           | 19.04           |
| 38               | 27.98                 | 0.85             | 1.30          | 2.64            | 12.98            | 0.76           | 1.18              | 0.81            | 16.43           | 21.15            | 1.73           | 21.22           |
| 41               | 26.86                 | 0.93             | 1.45          | 2.87            | 13.99            | 0.82           | 1.11              | 0.87            | 17.35           | 22.52            | 1.84           | 22.60           |

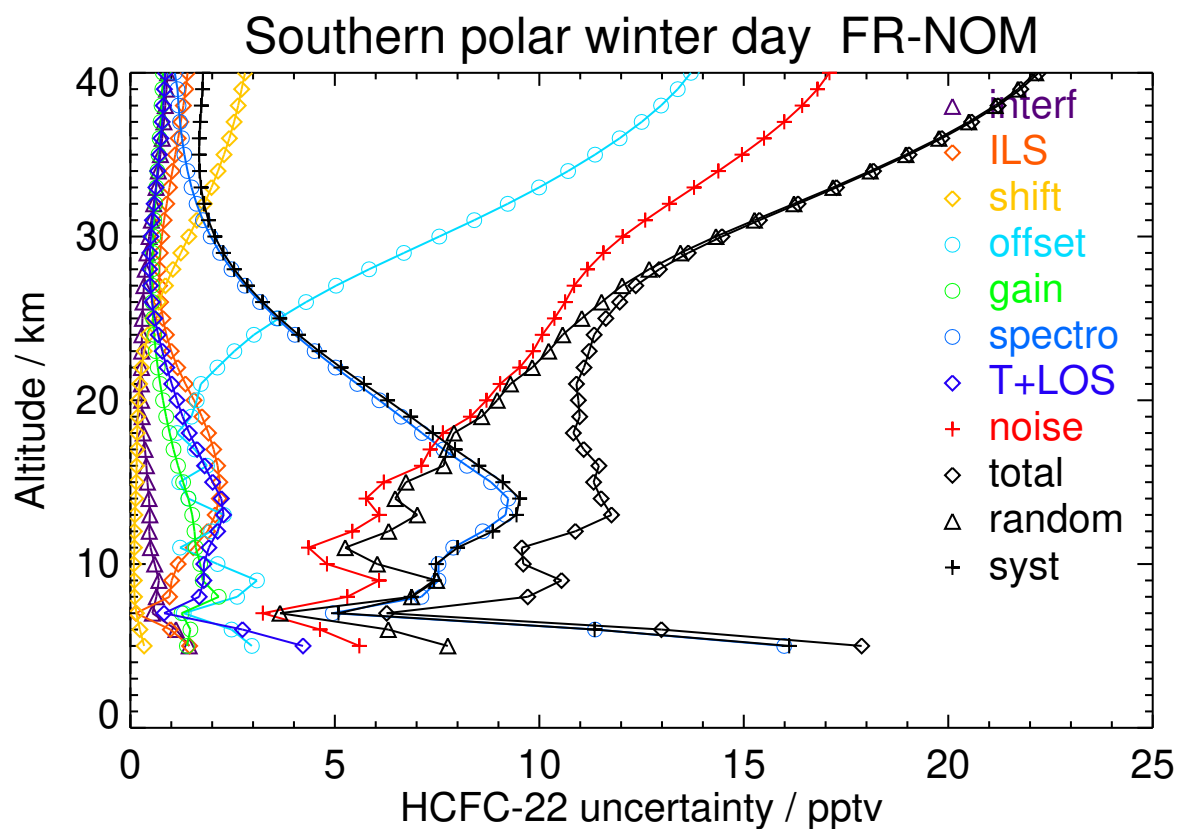

**Figure S27.** V8H\_F-22\_61 Southern polar winter day

**Table S29.** HCFC-22 error budget for Southern polar winter night. All uncertainties are  $1\sigma$ .

| altitude<br>(km) | mean target<br>(pptv) | interf<br>(pptv) | ILS<br>(pptv) | shift<br>(pptv) | offset<br>(pptv) | gain<br>(pptv) | spectro<br>(pptv) | T+LOS<br>(pptv) | noise<br>(pptv) | random<br>(pptv) | syst<br>(pptv) | total<br>(pptv) |
|------------------|-----------------------|------------------|---------------|-----------------|------------------|----------------|-------------------|-----------------|-----------------|------------------|----------------|-----------------|
| 5                | 149.12                | 1.42             | 0.67          | 0.20            | 2.79             | 1.04           | 8.37              | 2.36            | 5.03            | 7.26             | 7.72           | 10.60           |
| 8                | 149.06                | 0.54             | 0.25          | 0.08            | 1.88             | 1.91           | 4.89              | 1.31            | 4.19            | 5.03             | 5.04           | 7.12            |
| 11               | 146.60                | 0.44             | 0.71          | 0.05            | 1.23             | 1.77           | 5.94              | 1.26            | 4.25            | 4.95             | 5.98           | 7.76            |
| 14               | 123.78                | 0.42             | 1.69          | 0.14            | 1.23             | 1.73           | 8.10              | 1.80            | 5.53            | 6.02             | 8.41           | 10.34           |
| 17               | 99.85                 | 0.34             | 1.90          | 0.18            | 1.36             | 1.21           | 6.76              | 1.34            | 6.96            | 7.28             | 7.07           | 10.15           |
| 20               | 83.25                 | 0.27             | 1.65          | 0.22            | 1.64             | 0.94           | 5.82              | 0.98            | 8.45            | 8.72             | 6.06           | 10.61           |
| 23               | 66.39                 | 0.28             | 1.18          | 0.32            | 2.66             | 0.79           | 4.62              | 0.73            | 9.77            | 10.18            | 4.79           | 11.25           |
| 26               | 51.82                 | 0.31             | 0.93          | 0.60            | 4.72             | 0.69           | 3.40              | 0.54            | 10.79           | 11.83            | 3.55           | 12.35           |
| 29               | 42.36                 | 0.41             | 0.93          | 1.06            | 7.43             | 0.68           | 2.40              | 0.47            | 12.08           | 14.25            | 2.58           | 14.48           |
| 32               | 36.45                 | 0.56             | 1.09          | 1.55            | 10.11            | 0.71           | 1.75              | 0.53            | 13.89           | 17.28            | 2.05           | 17.40           |
| 35               | 32.53                 | 0.71             | 1.29          | 1.96            | 12.29            | 0.77           | 1.41              | 0.63            | 15.66           | 20.04            | 1.90           | 20.13           |
| 38               | 29.65                 | 0.82             | 1.48          | 2.27            | 13.89            | 0.82           | 1.26              | 0.72            | 17.04           | 22.15            | 1.94           | 22.23           |
| 41               | 24.89                 | 0.91             | 1.64          | 2.67            | 14.58            | 0.85           | 1.13              | 0.79            | 17.67           | 23.11            | 2.02           | 23.20           |

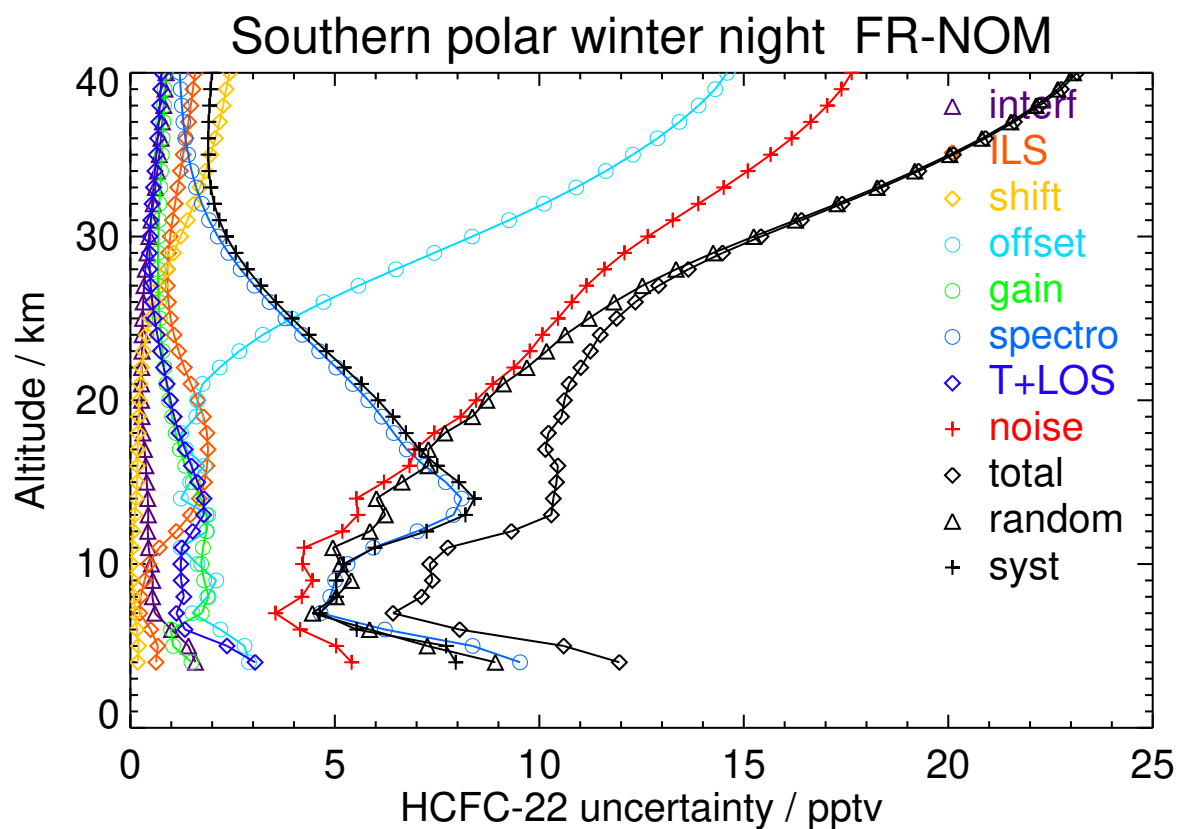

**Figure S28.** V8H\_F-22\_61 Southern polar winter night

**Table S30.** HCFC-22 error budget for Southern polar spring day. All uncertainties are  $1\sigma$ .

| altitude<br>(km) | mean target<br>(pptv) | interf<br>(pptv) | ILS<br>(pptv) | shift<br>(pptv) | offset<br>(pptv) | gain<br>(pptv) | spectro<br>(pptv) | T+LOS<br>(pptv) | noise<br>(pptv) | random<br>(pptv) | syst<br>(pptv) | total<br>(pptv) |
|------------------|-----------------------|------------------|---------------|-----------------|------------------|----------------|-------------------|-----------------|-----------------|------------------|----------------|-----------------|
| 8                | 151.46                | 0.62             | 0.54          | 0.09            | 1.41             | 1.55           | 5.02              | 1.14            | 3.50            | 4.40             | 4.95           | 6.62            |
| 11               | 145.50                | 0.49             | 2.24          | 0.26            | 2.07             | 1.49           | 7.44              | 1.87            | 5.34            | 6.23             | 7.77           | 9.96            |
| 14               | 118.14                | 0.44             | 4.98          | 0.36            | 1.96             | 0.90           | 9.19              | 2.26            | 6.41            | 7.20             | 10.42          | 12.66           |
| 17               | 85.96                 | 0.34             | 4.57          | 0.29            | 1.59             | 0.53           | 7.12              | 1.58            | 7.31            | 7.71             | 8.43           | 11.42           |
| 20               | 58.99                 | 0.25             | 2.84          | 0.34            | 1.30             | 0.24           | 4.73              | 0.96            | 7.73            | 7.95             | 5.47           | 9.65            |
| 23               | 43.59                 | 0.27             | 1.35          | 0.75            | 1.08             | 0.18           | 2.77              | 0.53            | 8.04            | 8.21             | 2.99           | 8.74            |
| 26               | 42.08                 | 0.36             | 0.91          | 1.44            | 1.20             | 0.24           | 1.84              | 0.43            | 8.47            | 8.72             | 1.95           | 8.93            |
| 29               | 47.91                 | 0.47             | 0.99          | 2.39            | 2.10             | 0.42           | 1.70              | 0.48            | 8.76            | 9.38             | 1.86           | 9.56            |
| 32               | 52.27                 | 0.61             | 0.98          | 3.36            | 3.81             | 0.67           | 1.71              | 0.53            | 9.13            | 10.51            | 1.93           | 10.68           |
| 35               | 52.14                 | 0.76             | 0.88          | 4.13            | 5.93             | 0.94           | 1.69              | 0.57            | 10.11           | 12.49            | 1.98           | 12.64           |
| 38               | 49.70                 | 0.90             | 0.91          | 4.69            | 8.00             | 1.19           | 1.63              | 0.62            | 11.68           | 14.97            | 2.08           | 15.12           |
| 41               | 46.99                 | 1.00             | 1.05          | 5.04            | 9.65             | 1.37           | 1.57              | 0.67            | 13.19           | 17.17            | 2.20           | 17.31           |

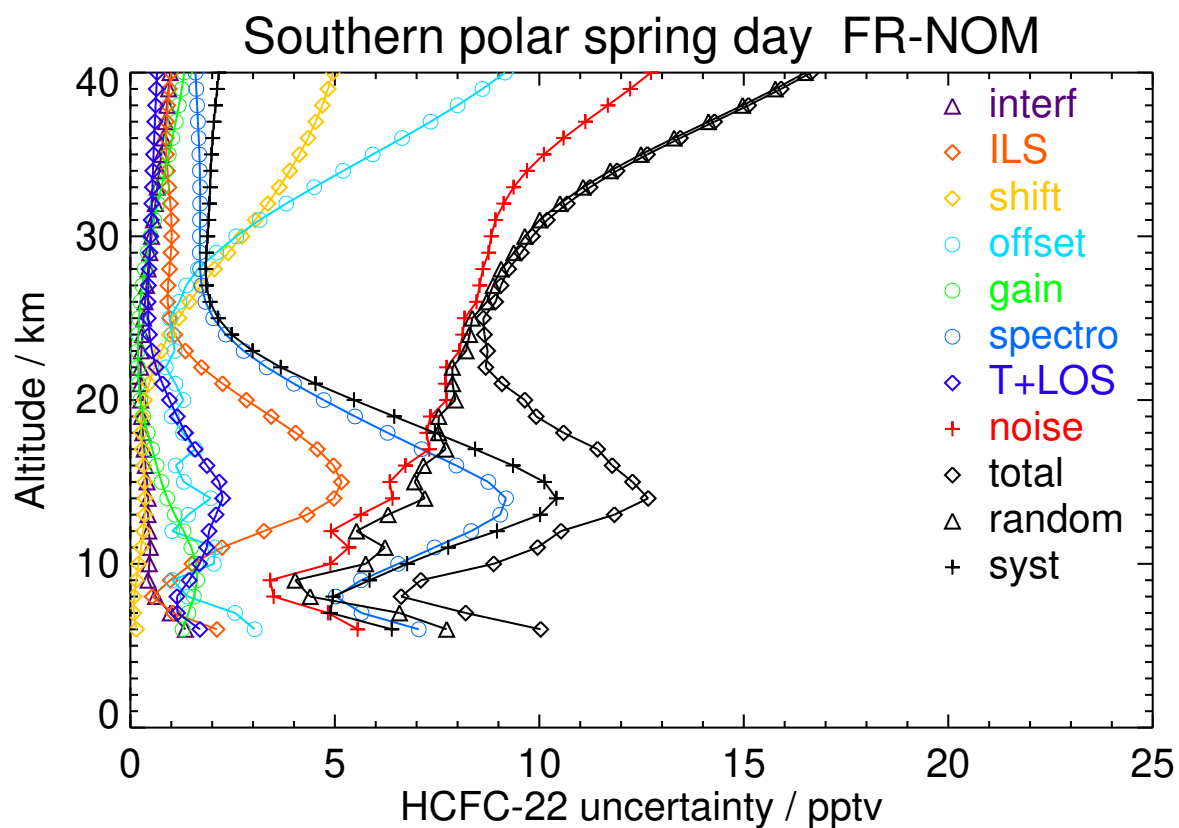

**Figure S29.** V8H\_F-22\_61 Southern polar spring day

**Table S31.** HCFC-22 error budget for Southern polar spring night. All uncertainties are  $1\sigma$ .

| altitude<br>(km) | mean target<br>(pptv) | interf<br>(pptv) | ILS<br>(pptv) | shift<br>(pptv) | offset<br>(pptv) | gain<br>(pptv) | spectro<br>(pptv) | T+LOS<br>(pptv) | noise<br>(pptv) | random<br>(pptv) | syst<br>(pptv) | total<br>(pptv) |
|------------------|-----------------------|------------------|---------------|-----------------|------------------|----------------|-------------------|-----------------|-----------------|------------------|----------------|-----------------|
| 8                | 152.02                | 0.52             | 0.53          | 0.08            | 1.10             | 1.67           | 4.66              | 1.12            | 3.15            | 3.87             | 4.75           | 6.12            |
| 11               | 146.76                | 0.47             | 1.29          | 0.16            | 1.85             | 1.93           | 6.60              | 1.48            | 4.81            | 5.65             | 6.79           | 8.83            |
| 14               | 121.12                | 0.40             | 3.83          | 0.22            | 1.95             | 1.47           | 8.44              | 1.97            | 6.01            | 6.95             | 9.16           | 11.50           |
| 17               | 93.68                 | 0.32             | 3.71          | 0.28            | 1.74             | 0.95           | 6.84              | 1.40            | 6.91            | 7.47             | 7.66           | 10.70           |
| 20               | 73.85                 | 0.26             | 2.59          | 0.43            | 1.44             | 0.64           | 4.96              | 0.88            | 7.59            | 7.97             | 5.38           | 9.62            |
| 23               | 65.78                 | 0.26             | 1.42          | 0.64            | 1.21             | 0.66           | 3.52              | 0.50            | 8.14            | 8.37             | 3.64           | 9.13            |
| 26               | 64.01                 | 0.33             | 1.13          | 1.19            | 1.46             | 0.80           | 3.05              | 0.38            | 8.60            | 8.95             | 2.98           | 9.43            |
| 29               | 59.50                 | 0.42             | 1.14          | 2.03            | 2.51             | 0.80           | 2.86              | 0.42            | 8.87            | 9.62             | 2.66           | 9.98            |
| 32               | 56.51                 | 0.55             | 1.07          | 2.93            | 4.40             | 0.84           | 2.53              | 0.48            | 9.34            | 10.87            | 2.41           | 11.13           |
| 35               | 54.47                 | 0.71             | 1.02          | 3.70            | 6.60             | 0.98           | 2.22              | 0.53            | 10.47           | 13.01            | 2.28           | 13.21           |
| 38               | 52.74                 | 0.85             | 1.10          | 4.27            | 8.67             | 1.14           | 1.99              | 0.58            | 12.10           | 15.56            | 2.28           | 15.72           |
| 41               | 51.96                 | 0.95             | 1.26          | 4.62            | 10.27            | 1.27           | 1.85              | 0.62            | 13.60           | 17.73            | 2.35           | 17.88           |

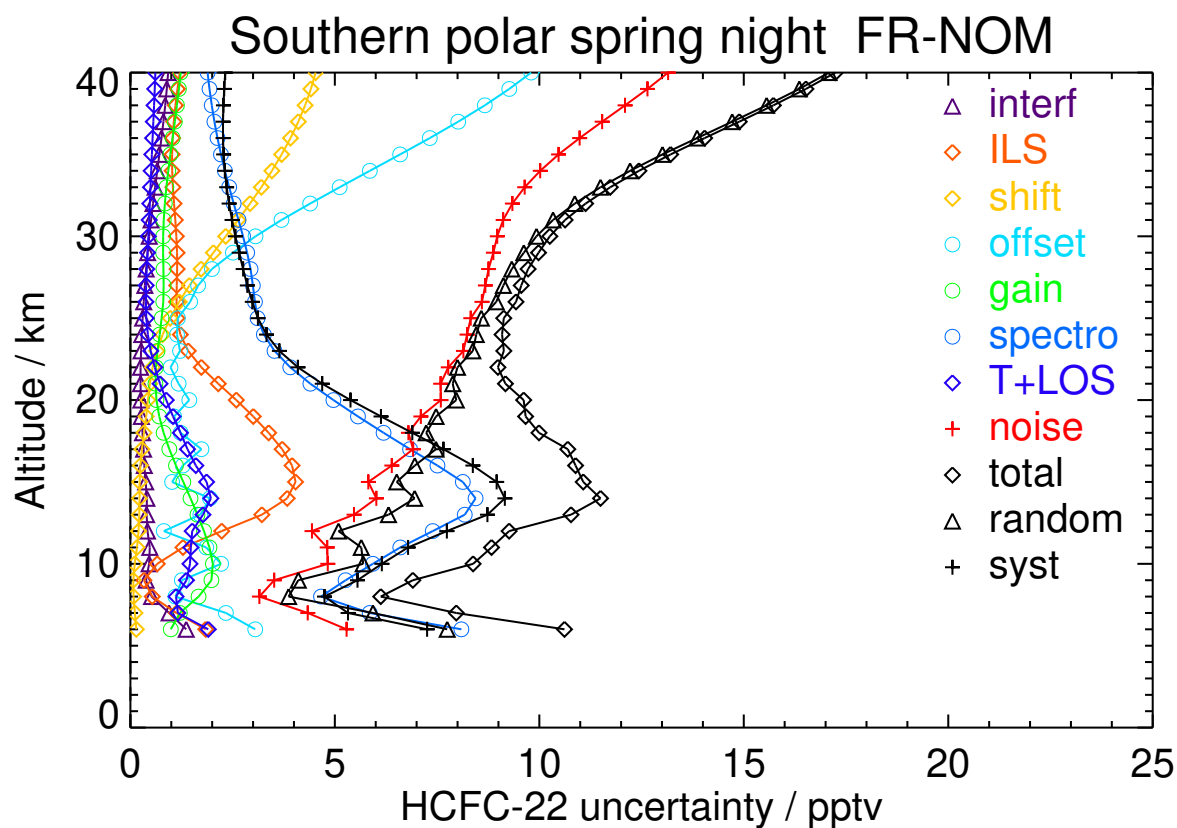

**Figure S30.** V8H\_F-22\_61 Southern polar spring night

**Table S32.** HCFC-22 error budget for Southern polar summer day. All uncertainties are  $1\sigma$ .

| altitude<br>(km) | mean target<br>(pptv) | interf<br>(pptv) | ILS<br>(pptv) | shift<br>(pptv) | offset<br>(pptv) | gain<br>(pptv) | spectro<br>(pptv) | T+LOS<br>(pptv) | noise<br>(pptv) | random<br>(pptv) | syst<br>(pptv) | total<br>(pptv) |
|------------------|-----------------------|------------------|---------------|-----------------|------------------|----------------|-------------------|-----------------|-----------------|------------------|----------------|-----------------|
| 5                | 141.91                | 1.76             | 0.75          | 0.40            | 2.65             | 1.68           | 10.17             | 2.90            | 5.27            | 9.50             | 7.94           | 12.38           |
| 8                | 147.56                | 0.39             | 0.50          | 0.16            | 0.75             | 1.99           | 5.16              | 1.62            | 2.97            | 4.21             | 5.02           | 6.56            |
| 11               | 143.10                | 0.59             | 0.77          | 0.09            | 1.01             | 0.71           | 5.30              | 1.02            | 3.70            | 4.63             | 4.89           | 6.73            |
| 14               | 130.89                | 0.39             | 1.74          | 0.10            | 1.22             | 1.93           | 7.55              | 1.28            | 4.65            | 5.10             | 7.92           | 9.42            |
| 17               | 114.76                | 0.31             | 2.97          | 0.21            | 1.33             | 1.26           | 6.16              | 1.02            | 5.54            | 5.87             | 6.89           | 9.06            |
| 20               | 99.18                 | 0.25             | 2.38          | 0.38            | 1.29             | 1.23           | 5.30              | 0.69            | 6.52            | 6.75             | 5.86           | 8.94            |
| 23               | 90.21                 | 0.24             | 1.38          | 0.50            | 1.06             | 1.38           | 4.30              | 0.40            | 7.40            | 7.56             | 4.64           | 8.87            |
| 26               | 83.78                 | 0.27             | 1.18          | 0.81            | 1.09             | 1.24           | 3.84              | 0.33            | 8.10            | 8.25             | 4.14           | 9.23            |
| 29               | 79.14                 | 0.33             | 1.16          | 1.35            | 1.84             | 1.00           | 3.46              | 0.35            | 8.59            | 8.92             | 3.74           | 9.67            |
| 32               | 72.61                 | 0.45             | 1.03          | 2.16            | 3.31             | 1.01           | 3.03              | 0.41            | 8.95            | 9.81             | 3.33           | 10.36           |
| 35               | 66.64                 | 0.62             | 0.86          | 3.00            | 5.18             | 1.17           | 2.65              | 0.49            | 9.78            | 11.50            | 2.98           | 11.88           |
| 38               | 60.94                 | 0.81             | 0.82          | 3.76            | 7.05             | 1.38           | 2.34              | 0.59            | 11.17           | 13.78            | 2.77           | 14.06           |
| 41               | 56.29                 | 0.97             | 0.92          | 4.31            | 8.59             | 1.53           | 2.12              | 0.68            | 12.65           | 15.95            | 2.69           | 16.18           |

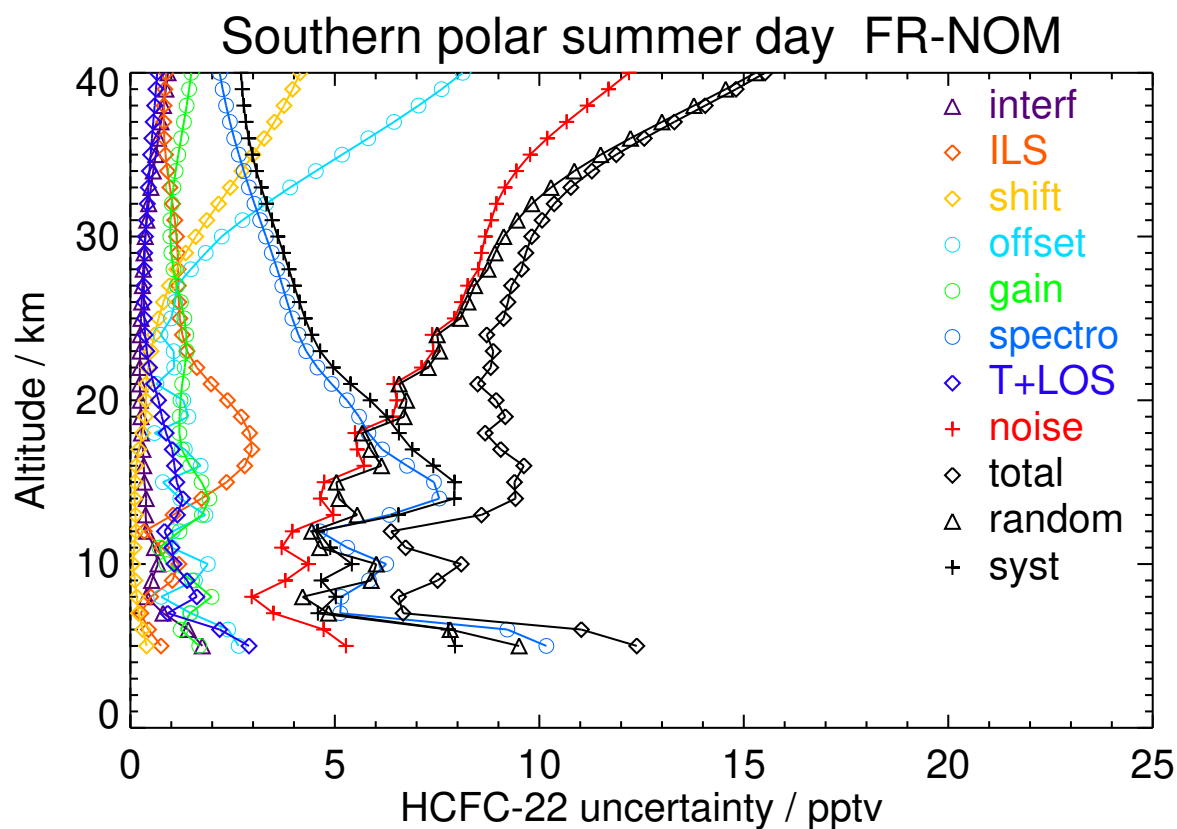

**Figure S31.** V8H\_F-22\_61 Southern polar summer day

**Table S33.** HCFC-22 error budget for Southern polar summer night. All uncertainties are  $1\sigma$ .

| altitude<br>(km) | mean target<br>(pptv) | interf<br>(pptv) | ILS<br>(pptv) | shift<br>(pptv) | offset<br>(pptv) | gain<br>(pptv) | spectro<br>(pptv) | T+LOS<br>(pptv) | noise<br>(pptv) | random<br>(pptv) | syst<br>(pptv) | total<br>(pptv) |
|------------------|-----------------------|------------------|---------------|-----------------|------------------|----------------|-------------------|-----------------|-----------------|------------------|----------------|-----------------|
| 5                | 150.44                | 1.57             | 0.33          | 0.36            | 2.61             | 0.32           | 5.81              | 2.11            | 5.13            | 6.34             | 5.83           | 8.61            |
| 8                | 141.68                | 1.25             | 1.85          | 0.09            | 2.56             | 1.08           | 10.79             | 2.35            | 5.14            | 7.88             | 9.95           | 12.70           |
| 11               | 143.28                | 0.35             | 0.33          | 0.07            | 1.28             | 1.62           | 5.16              | 0.95            | 3.68            | 4.42             | 5.10           | 6.75            |
| 14               | 137.07                | 0.36             | 1.67          | 0.10            | 0.84             | 1.76           | 6.66              | 0.98            | 4.33            | 4.62             | 7.03           | 8.41            |
| 17               | 117.99                | 0.30             | 3.04          | 0.28            | 0.65             | 1.60           | 6.94              | 1.02            | 5.28            | 5.49             | 7.70           | 9.46            |
| 20               | 101.67                | 0.24             | 1.94          | 0.36            | 0.77             | 1.16           | 5.43              | 0.66            | 6.31            | 6.45             | 5.84           | 8.70            |
| 23               | 90.69                 | 0.23             | 1.01          | 0.50            | 0.87             | 0.99           | 4.48              | 0.39            | 7.36            | 7.46             | 4.67           | 8.80            |
| 26               | 81.84                 | 0.27             | 0.97          | 0.77            | 1.23             | 0.91           | 3.98              | 0.34            | 8.26            | 8.41             | 4.17           | 9.39            |
| 29               | 73.68                 | 0.34             | 0.98          | 1.25            | 2.36             | 0.88           | 3.48              | 0.34            | 8.84            | 9.27             | 3.69           | 9.97            |
| 32               | 65.04                 | 0.45             | 0.90          | 1.89            | 4.22             | 0.97           | 2.98              | 0.38            | 9.47            | 10.57            | 3.21           | 11.05           |
| 35               | 59.76                 | 0.61             | 0.86          | 2.53            | 6.29             | 1.14           | 2.59              | 0.45            | 10.67           | 12.69            | 2.89           | 13.01           |
| 38               | 56.57                 | 0.77             | 0.92          | 3.07            | 8.19             | 1.31           | 2.31              | 0.54            | 12.33           | 15.16            | 2.74           | 15.41           |
| 41               | 54.18                 | 0.89             | 1.04          | 3.44            | 9.62             | 1.45           | 2.13              | 0.61            | 13.80           | 17.22            | 2.69           | 17.43           |

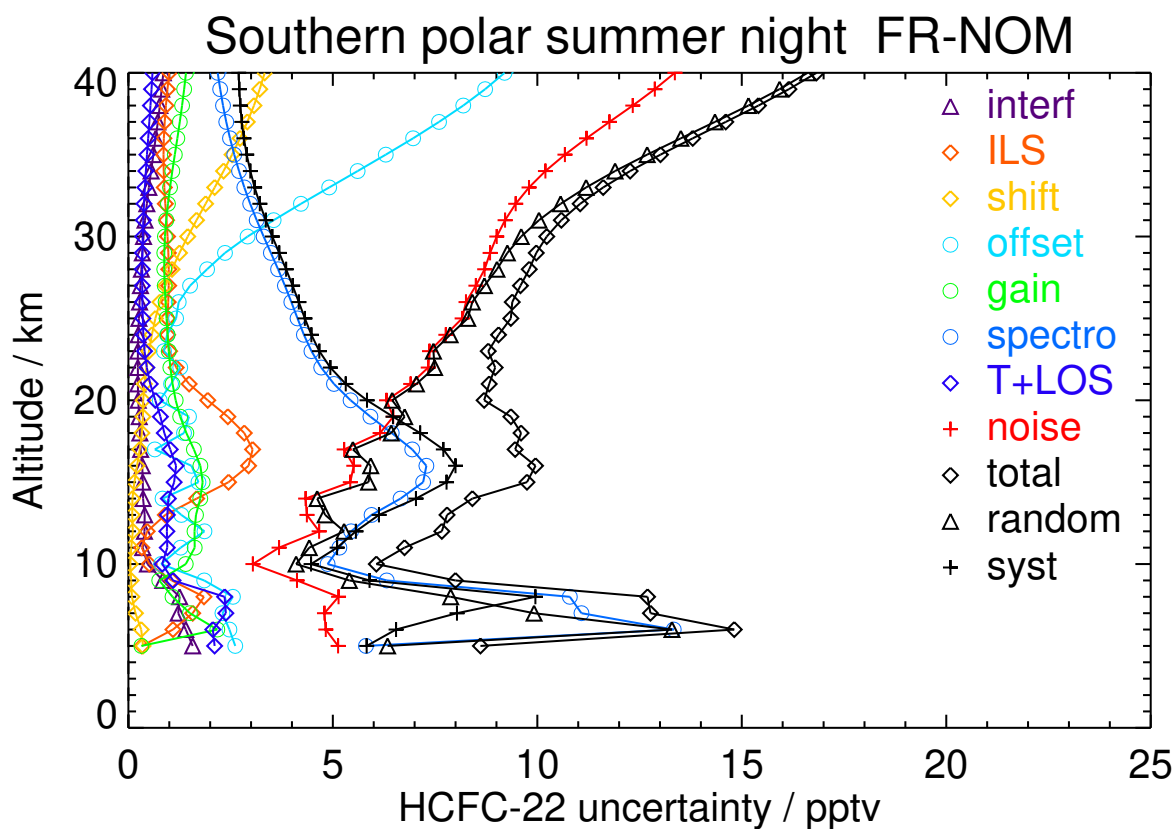

**Figure S32.** V8H\_F-22\_61 Southern polar summer night

**Table S34.** HCFC-22 error budget for Southern polar autumn day. All uncertainties are  $1\sigma$ .

| altitude<br>(km) | mean target<br>(pptv) | interf<br>(pptv) | ILS<br>(pptv) | shift<br>(pptv) | offset<br>(pptv) | gain<br>(pptv) | spectro<br>(pptv) | T+LOS<br>(pptv) | noise<br>(pptv) | random<br>(pptv) | syst<br>(pptv) | total<br>(pptv) |
|------------------|-----------------------|------------------|---------------|-----------------|------------------|----------------|-------------------|-----------------|-----------------|------------------|----------------|-----------------|
| 5                | 149.76                | 1.28             | 0.46          | 0.32            | 2.43             | 1.32           | 5.01              | 0.89            | 4.15            | 5.44             | 4.80           | 7.26            |
| 8                | 145.05                | 0.91             | 0.81          | 0.08            | 2.21             | 0.84           | 6.04              | 0.95            | 3.99            | 5.37             | 5.62           | 7.77            |
| 11               | 142.87                | 0.39             | 0.35          | 0.07            | 2.10             | 1.71           | 5.54              | 1.01            | 4.24            | 5.01             | 5.68           | 7.57            |
| 14               | 131.62                | 0.35             | 1.98          | 0.15            | 1.94             | 2.02           | 7.79              | 1.21            | 5.02            | 5.60             | 8.24           | 9.96            |
| 17               | 107.29                | 0.30             | 2.43          | 0.30            | 1.55             | 1.57           | 6.92              | 0.97            | 5.88            | 6.21             | 7.47           | 9.71            |
| 20               | 94.34                 | 0.24             | 1.40          | 0.36            | 1.20             | 1.26           | 5.32              | 0.61            | 6.86            | 7.06             | 5.57           | 8.99            |
| 23               | 81.74                 | 0.24             | 0.92          | 0.45            | 1.28             | 1.16           | 4.43              | 0.42            | 7.92            | 8.08             | 4.61           | 9.30            |
| 26               | 73.50                 | 0.28             | 0.76          | 0.60            | 2.49             | 0.97           | 3.85              | 0.36            | 8.88            | 9.27             | 3.99           | 10.10           |
| 29               | 63.45                 | 0.34             | 0.68          | 0.87            | 4.89             | 0.88           | 3.22              | 0.35            | 9.87            | 11.07            | 3.37           | 11.57           |
| 32               | 53.00                 | 0.45             | 0.67          | 1.20            | 7.79             | 0.93           | 2.61              | 0.39            | 11.48           | 13.95            | 2.79           | 14.22           |
| 35               | 45.62                 | 0.57             | 0.72          | 1.51            | 10.35            | 1.02           | 2.15              | 0.46            | 13.40           | 17.03            | 2.41           | 17.20           |
| 38               | 40.99                 | 0.68             | 0.80          | 1.73            | 12.31            | 1.10           | 1.85              | 0.53            | 15.09           | 19.58            | 2.20           | 19.70           |
| 41               | 38.35                 | 0.74             | 0.87          | 1.88            | 13.57            | 1.15           | 1.68              | 0.58            | 16.21           | 21.25            | 2.11           | 21.36           |

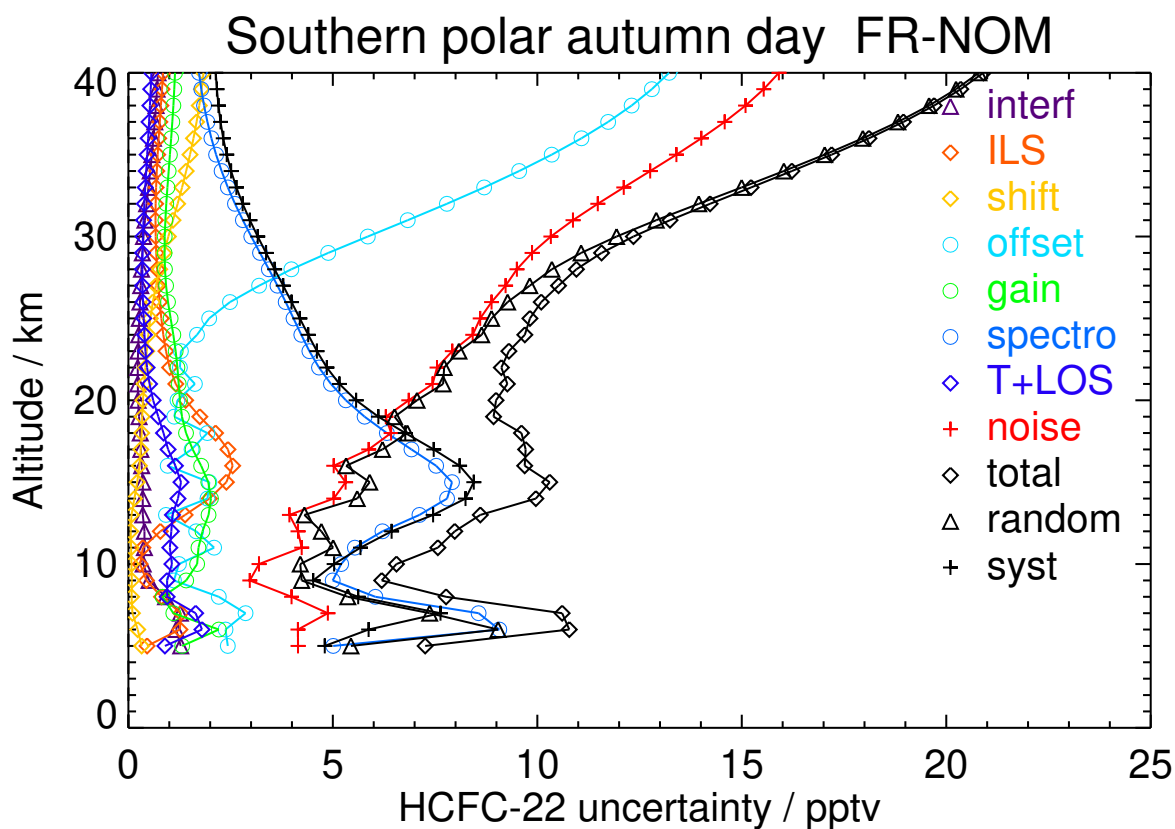

**Figure S33.** V8H\_F-22\_61 Southern polar autumn day

**Table S35.** HCFC-22 error budget for Southern polar autumn night. All uncertainties are  $1\sigma$ .

| altitude<br>(km) | mean target<br>(pptv) | interf<br>(pptv) | ILS<br>(pptv) | shift<br>(pptv) | offset<br>(pptv) | gain<br>(pptv) | spectro<br>(pptv) | T+LOS<br>(pptv) | noise<br>(pptv) | random<br>(pptv) | syst<br>(pptv) | total<br>(pptv) |
|------------------|-----------------------|------------------|---------------|-----------------|------------------|----------------|-------------------|-----------------|-----------------|------------------|----------------|-----------------|
| 5                | 145.94                | 1.25             | 0.30          | 0.29            | 2.44             | 0.93           | 6.21              | 1.31            | 4.15            | 5.92             | 5.57           | 8.13            |
| 8                | 146.48                | 0.73             | 0.60          | 0.10            | 2.13             | 1.26           | 5.06              | 1.06            | 3.95            | 5.24             | 4.69           | 7.03            |
| 11               | 143.10                | 0.39             | 0.29          | 0.06            | 1.63             | 1.57           | 5.11              | 0.91            | 3.92            | 4.52             | 5.22           | 6.90            |
| 14               | 130.95                | 0.36             | 1.66          | 0.14            | 1.37             | 2.02           | 7.46              | 1.17            | 4.77            | 5.20             | 7.85           | 9.42            |
| 17               | 110.41                | 0.30             | 2.38          | 0.29            | 1.12             | 1.53           | 6.87              | 1.01            | 5.75            | 6.04             | 7.36           | 9.52            |
| 20               | 95.35                 | 0.24             | 1.64          | 0.35            | 1.08             | 1.23           | 5.73              | 0.69            | 6.94            | 7.15             | 6.00           | 9.33            |
| 23               | 84.79                 | 0.24             | 0.90          | 0.42            | 1.46             | 1.02           | 4.74              | 0.45            | 8.13            | 8.32             | 4.88           | 9.65            |
| 26               | 73.31                 | 0.29             | 0.70          | 0.57            | 2.99             | 0.93           | 4.05              | 0.39            | 9.21            | 9.73             | 4.18           | 10.59           |
| 29               | 61.77                 | 0.36             | 0.68          | 0.82            | 5.65             | 0.89           | 3.34              | 0.37            | 10.45           | 11.94            | 3.48           | 12.43           |
| 32               | 50.48                 | 0.47             | 0.76          | 1.11            | 8.64             | 0.90           | 2.70              | 0.42            | 12.32           | 15.12            | 2.87           | 15.39           |
| 35               | 41.96                 | 0.58             | 0.87          | 1.36            | 11.16            | 0.92           | 2.21              | 0.49            | 14.29           | 18.21            | 2.46           | 18.38           |
| 38               | 36.34                 | 0.68             | 0.99          | 1.55            | 13.02            | 0.95           | 1.89              | 0.55            | 15.88           | 20.62            | 2.23           | 20.74           |
| 41               | 31.13                 | 0.74             | 1.11          | 1.73            | 13.93            | 1.01           | 1.66              | 0.58            | 16.63           | 21.79            | 2.14           | 21.90           |

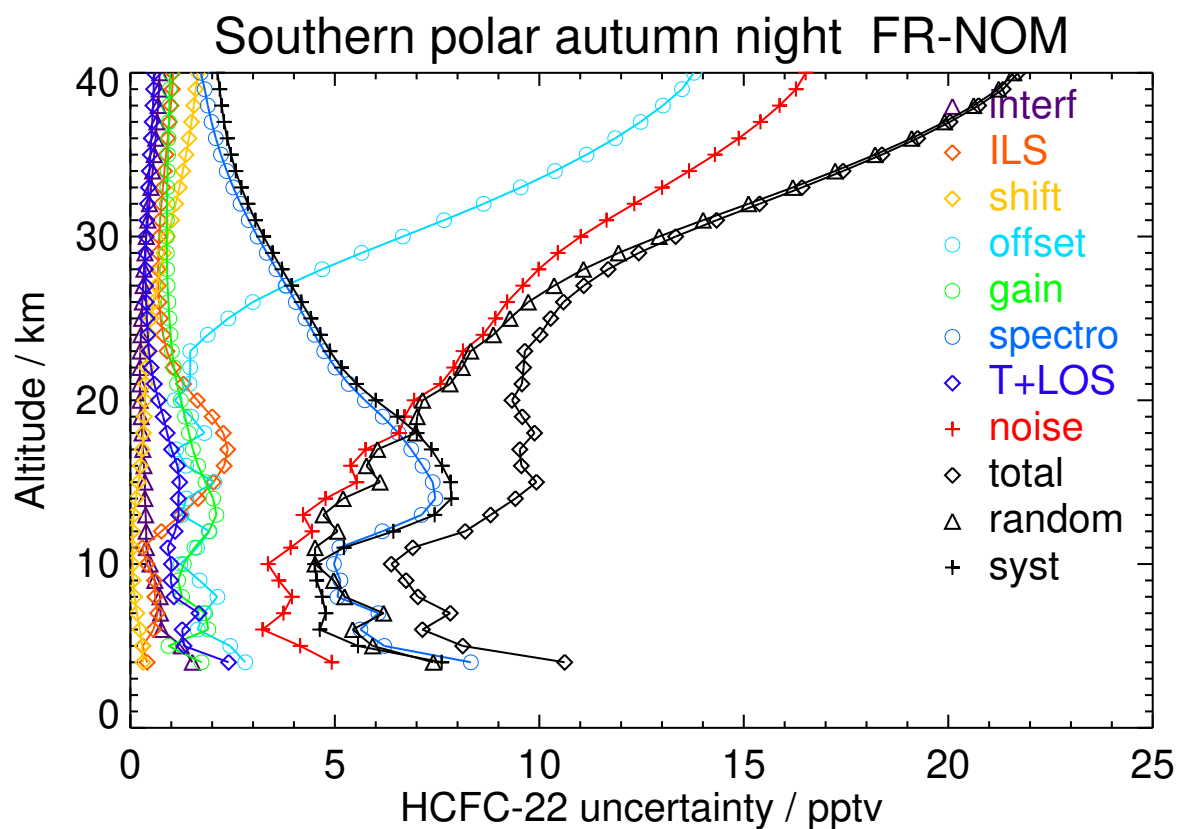

**Figure S34.** V8H\_F-22\_61 Southern polar autumn night

**Table S36.** HCFC-22 error budget for Northern polar winter day. All uncertainties are  $1\sigma$ .

| altitude<br>(km) | mean target<br>(pptv) | interf<br>(pptv) | ILS<br>(pptv) | shift<br>(pptv) | offset<br>(pptv) | gain<br>(pptv) | spectro<br>(pptv) | T+LOS<br>(pptv) | noise<br>(pptv) | random<br>(pptv) | syst<br>(pptv) | total<br>(pptv) |
|------------------|-----------------------|------------------|---------------|-----------------|------------------|----------------|-------------------|-----------------|-----------------|------------------|----------------|-----------------|
| 8                | 197.58                | 0.96             | 1.29          | 0.09            | 0.71             | 1.90           | 6.52              | 1.14            | 4.99            | 6.04             | 6.24           | 8.68            |
| 11               | 180.03                | 0.46             | 3.05          | 0.23            | 0.53             | 2.36           | 8.86              | 1.30            | 4.45            | 5.08             | 9.46           | 10.74           |
| 14               | 158.96                | 0.36             | 4.60          | 0.37            | 0.45             | 2.20           | 9.38              | 1.28            | 4.92            | 5.48             | 10.50          | 11.84           |
| 17               | 135.82                | 0.36             | 3.65          | 0.52            | 0.45             | 1.73           | 7.28              | 0.83            | 5.44            | 5.83             | 8.13           | 10.01           |
| 20               | 129.52                | 0.36             | 1.33          | 0.76            | 0.54             | 1.37           | 5.78              | 0.51            | 5.96            | 6.51             | 5.62           | 8.60            |
| 23               | 126.31                | 0.38             | 0.98          | 0.83            | 0.66             | 1.41           | 5.08              | 0.37            | 6.89            | 7.18             | 5.11           | 8.81            |
| 26               | 119.98                | 0.45             | 1.18          | 0.86            | 1.20             | 1.42           | 4.86              | 0.34            | 7.83            | 8.07             | 5.06           | 9.53            |
| 29               | 108.85                | 0.53             | 1.29          | 0.88            | 2.61             | 1.27           | 4.47              | 0.32            | 8.48            | 8.99             | 4.72           | 10.15           |
| 32               | 97.46                 | 0.65             | 1.40          | 0.87            | 4.64             | 1.27           | 3.99              | 0.31            | 10.25           | 11.35            | 4.31           | 12.14           |
| 35               | 88.76                 | 0.76             | 1.42          | 0.87            | 6.56             | 1.31           | 3.62              | 0.32            | 12.49           | 14.19            | 3.98           | 14.74           |
| 38               | 82.27                 | 0.84             | 1.41          | 0.87            | 8.04             | 1.36           | 3.35              | 0.34            | 14.34           | 16.52            | 3.75           | 16.94           |
| 41               | 70.72                 | 0.90             | 1.51          | 1.04            | 8.69             | 1.30           | 2.75              | 0.38            | 15.06           | 17.47            | 3.28           | 17.78           |

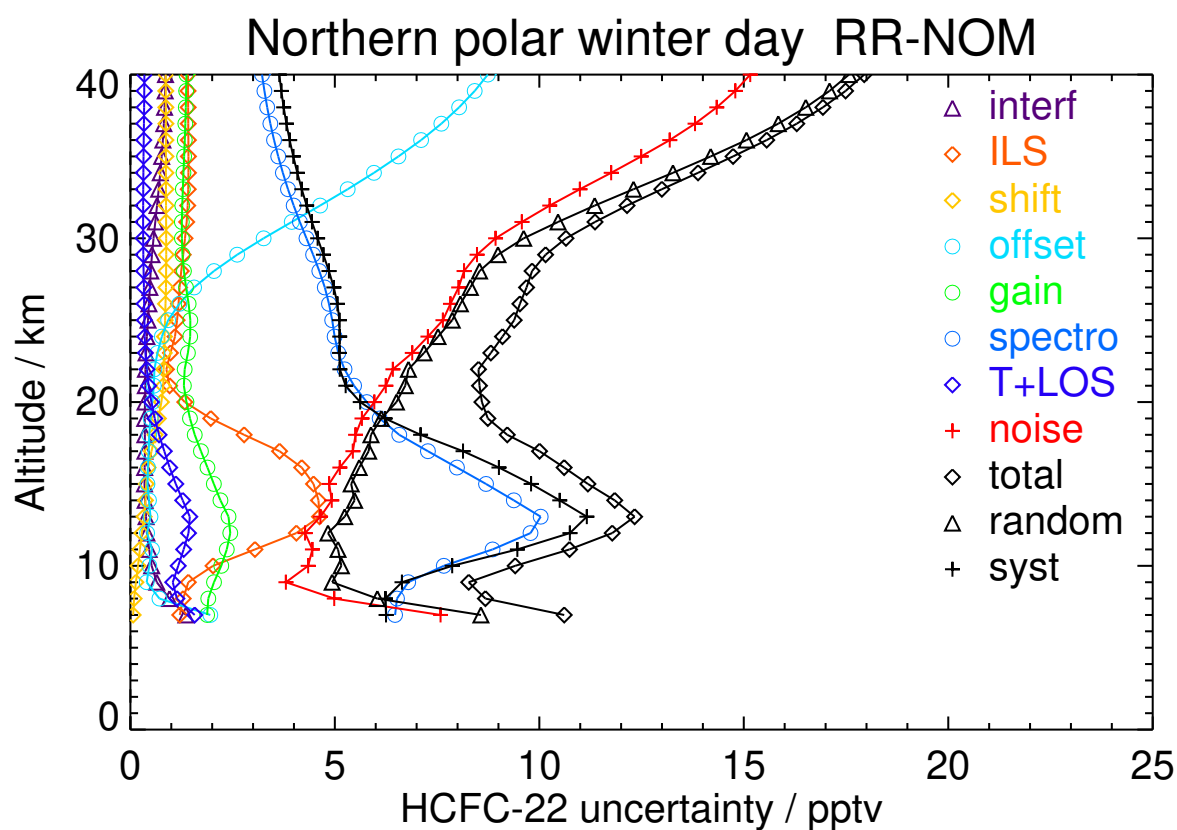

**Figure S35.** V8R\_F-22\_261 Northern polar winter day

**Table S37.** HCFC-22 error budget for Northern polar winter night. All uncertainties are  $1\sigma$ .

| altitude<br>(km) | mean target<br>(pptv) | interf<br>(pptv) | ILS<br>(pptv) | shift<br>(pptv) | offset<br>(pptv) | gain<br>(pptv) | spectro<br>(pptv) | T+LOS<br>(pptv) | noise<br>(pptv) | random<br>(pptv) | syst<br>(pptv) | total<br>(pptv) |
|------------------|-----------------------|------------------|---------------|-----------------|------------------|----------------|-------------------|-----------------|-----------------|------------------|----------------|-----------------|
| 8                | 203.07                | 0.86             | 1.84          | 0.08            | 0.53             | 1.77           | 7.13              | 1.29            | 4.25            | 6.19             | 6.31           | 8.84            |
| 11               | 185.84                | 0.51             | 2.79          | 0.22            | 0.47             | 2.23           | 8.79              | 1.27            | 4.47            | 5.16             | 9.25           | 10.59           |
| 14               | 162.03                | 0.38             | 4.71          | 0.32            | 0.49             | 1.92           | 9.65              | 1.38            | 5.07            | 5.54             | 10.78          | 12.12           |
| 17               | 135.29                | 0.37             | 3.84          | 0.43            | 0.51             | 1.28           | 8.09              | 1.02            | 5.73            | 6.05             | 8.93           | 10.78           |
| 20               | 112.72                | 0.36             | 2.09          | 0.62            | 0.68             | 1.33           | 5.96              | 0.69            | 6.35            | 6.69             | 6.22           | 9.13            |
| 23               | 101.75                | 0.40             | 1.50          | 0.76            | 0.82             | 1.99           | 4.48              | 0.45            | 7.33            | 7.78             | 4.59           | 9.03            |
| 26               | 99.47                 | 0.47             | 1.46          | 0.95            | 1.03             | 1.65           | 3.87              | 0.38            | 7.93            | 8.33             | 3.95           | 9.22            |
| 29               | 95.47                 | 0.58             | 1.46          | 1.30            | 1.89             | 1.10           | 3.60              | 0.41            | 8.25            | 8.77             | 3.64           | 9.49            |
| 32               | 85.95                 | 0.73             | 1.63          | 1.61            | 3.44             | 0.99           | 3.25              | 0.45            | 9.00            | 9.93             | 3.42           | 10.50           |
| 35               | 77.56                 | 0.89             | 1.62          | 1.83            | 5.16             | 1.03           | 2.91              | 0.48            | 10.69           | 12.14            | 3.18           | 12.55           |
| 38               | 73.08                 | 1.00             | 1.58          | 1.95            | 6.70             | 1.11           | 2.66              | 0.49            | 12.65           | 14.55            | 3.03           | 14.86           |
| 41               | 70.26                 | 1.06             | 1.55          | 1.98            | 7.84             | 1.18           | 2.51              | 0.51            | 14.12           | 16.36            | 2.94           | 16.62           |

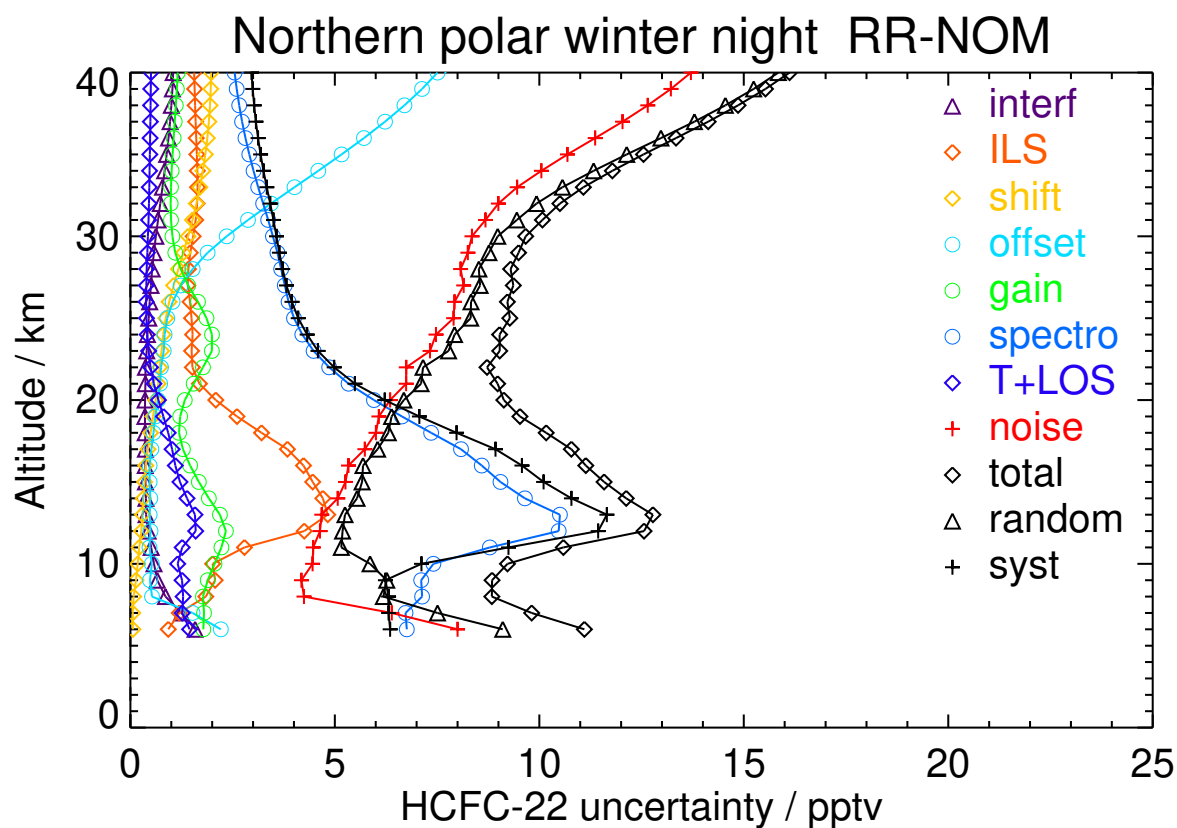

**Figure S36.** V8R\_F-22\_261 Northern polar winter night

**Table S38.** HCFC-22 error budget for Northern polar spring day. All uncertainties are  $1\sigma$ .

| altitude<br>(km) | mean target<br>(pptv) | interf<br>(pptv) | ILS<br>(pptv) | shift<br>(pptv) | offset<br>(pptv) | gain<br>(pptv) | spectro<br>(pptv) | T+LOS<br>(pptv) | noise<br>(pptv) | random<br>(pptv) | syst<br>(pptv) | total<br>(pptv) |
|------------------|-----------------------|------------------|---------------|-----------------|------------------|----------------|-------------------|-----------------|-----------------|------------------|----------------|-----------------|
| 8                | 185.54                | 1.01             | 1.14          | 0.10            | 1.31             | 1.76           | 6.10              | 1.30            | 6.43            | 7.27             | 5.88           | 9.35            |
| 11               | 176.45                | 0.41             | 2.53          | 0.23            | 0.47             | 2.31           | 8.03              | 1.16            | 4.36            | 4.69             | 8.67           | 9.85            |
| 14               | 162.15                | 0.35             | 3.99          | 0.33            | 0.42             | 2.36           | 9.65              | 1.26            | 4.87            | 5.16             | 10.66          | 11.84           |
| 17               | 137.60                | 0.35             | 2.93          | 0.42            | 0.43             | 1.83           | 8.11              | 0.91            | 5.67            | 5.85             | 8.76           | 10.54           |
| 20               | 122.82                | 0.34             | 1.31          | 0.51            | 0.54             | 1.72           | 6.09              | 0.59            | 6.55            | 6.73             | 6.36           | 9.26            |
| 23               | 114.47                | 0.36             | 0.86          | 0.42            | 0.82             | 1.53           | 5.11              | 0.37            | 7.74            | 7.87             | 5.33           | 9.50            |
| 26               | 103.16                | 0.44             | 0.86          | 0.44            | 1.69             | 1.23           | 4.47              | 0.32            | 8.80            | 9.01             | 4.68           | 10.15           |
| 29               | 93.14                 | 0.52             | 1.15          | 0.58            | 3.29             | 1.11           | 3.85              | 0.32            | 9.72            | 10.31            | 4.13           | 11.11           |
| 32               | 84.16                 | 0.68             | 1.41          | 0.85            | 5.20             | 1.10           | 3.31              | 0.41            | 11.24           | 12.45            | 3.71           | 12.99           |
| 35               | 76.97                 | 0.87             | 1.57          | 1.12            | 6.93             | 1.12           | 2.89              | 0.55            | 13.03           | 14.85            | 3.41           | 15.24           |
| 38               | 71.49                 | 1.04             | 1.68          | 1.35            | 8.35             | 1.14           | 2.60              | 0.69            | 14.74           | 17.05            | 3.22           | 17.35           |
| 41               | 67.45                 | 1.15             | 1.76          | 1.50            | 9.38             | 1.17           | 2.42              | 0.79            | 15.98           | 18.66            | 3.12           | 18.92           |

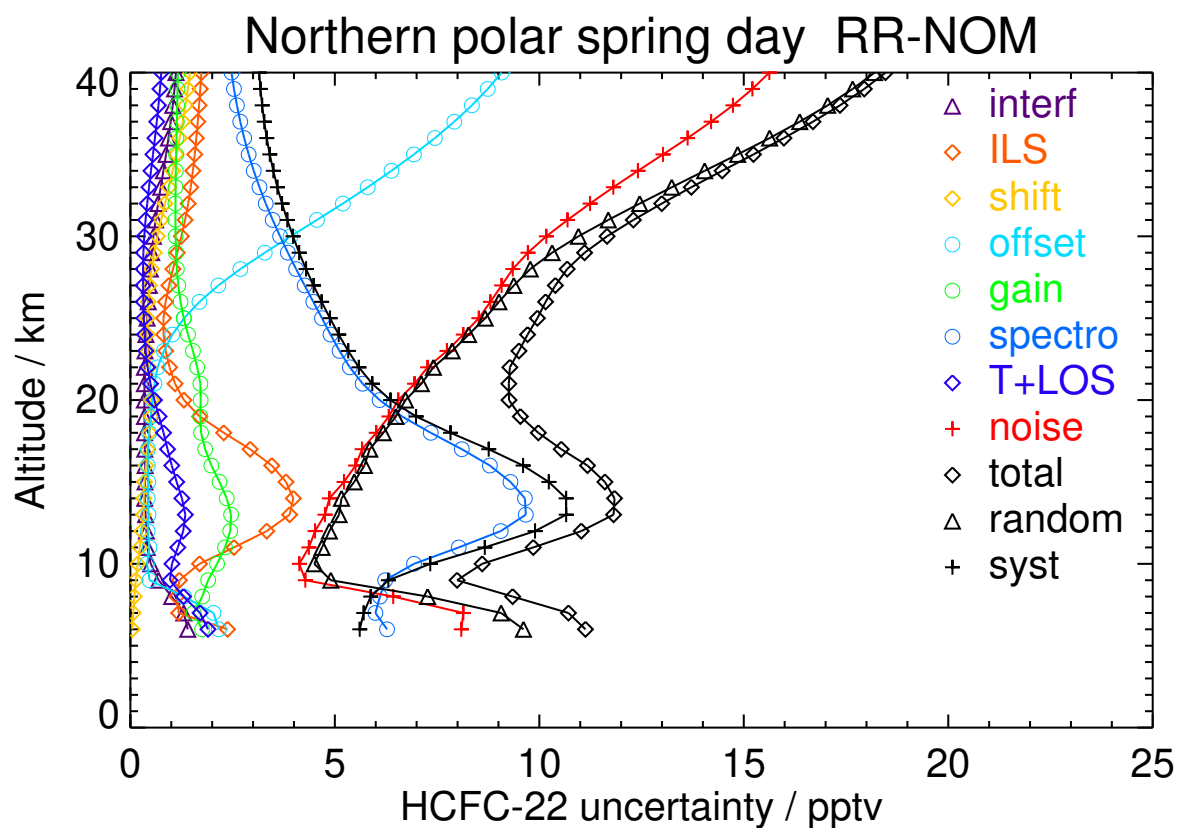

**Figure S37.** V8R\_F-22\_261 Northern polar spring day

**Table S39.** HCFC-22 error budget for Northern polar spring night. All uncertainties are  $1\sigma$ .

| altitude<br>(km) | mean target<br>(pptv) | interf<br>(pptv) | ILS<br>(pptv) | shift<br>(pptv) | offset<br>(pptv) | gain<br>(pptv) | spectro<br>(pptv) | T+LOS<br>(pptv) | noise<br>(pptv) | random<br>(pptv) | syst<br>(pptv) | total<br>(pptv) |
|------------------|-----------------------|------------------|---------------|-----------------|------------------|----------------|-------------------|-----------------|-----------------|------------------|----------------|-----------------|
| 8                | 187.94                | 1.18             | 1.30          | 0.10            | 1.87             | 1.74           | 6.28              | 1.46            | 7.61            | 8.68             | 5.82           | 10.45           |
| 11               | 181.05                | 0.46             | 2.12          | 0.24            | 0.47             | 2.11           | 7.59              | 1.06            | 4.36            | 5.04             | 7.86           | 9.34            |
| 14               | 167.27                | 0.37             | 4.29          | 0.37            | 0.47             | 2.26           | 9.85              | 1.36            | 4.85            | 5.23             | 10.91          | 12.10           |
| 17               | 147.34                | 0.37             | 3.68          | 0.44            | 0.48             | 1.89           | 8.81              | 1.00            | 5.64            | 5.87             | 9.67           | 11.31           |
| 20               | 124.72                | 0.34             | 1.44          | 0.51            | 0.61             | 1.49           | 6.65              | 0.70            | 6.44            | 6.62             | 6.89           | 9.55            |
| 23               | 112.24                | 0.36             | 0.74          | 0.43            | 0.89             | 1.22           | 5.19              | 0.42            | 7.68            | 7.80             | 5.32           | 9.44            |
| 26               | 103.20                | 0.44             | 0.88          | 0.45            | 1.77             | 1.06           | 4.34              | 0.33            | 8.75            | 8.97             | 4.52           | 10.05           |
| 29               | 93.18                 | 0.52             | 1.18          | 0.60            | 3.37             | 1.05           | 3.65              | 0.32            | 9.63            | 10.26            | 3.93           | 10.98           |
| 32               | 85.31                 | 0.67             | 1.40          | 0.86            | 5.28             | 1.08           | 3.09              | 0.41            | 11.11           | 12.37            | 3.51           | 12.86           |
| 35               | 79.37                 | 0.85             | 1.51          | 1.14            | 7.02             | 1.13           | 2.71              | 0.55            | 12.91           | 14.79            | 3.24           | 15.14           |
| 38               | 74.37                 | 1.01             | 1.59          | 1.36            | 8.45             | 1.18           | 2.48              | 0.68            | 14.63           | 17.00            | 3.10           | 17.28           |
| 41               | 70.69                 | 1.12             | 1.66          | 1.51            | 9.48             | 1.22           | 2.33              | 0.79            | 15.87           | 18.61            | 3.04           | 18.86           |

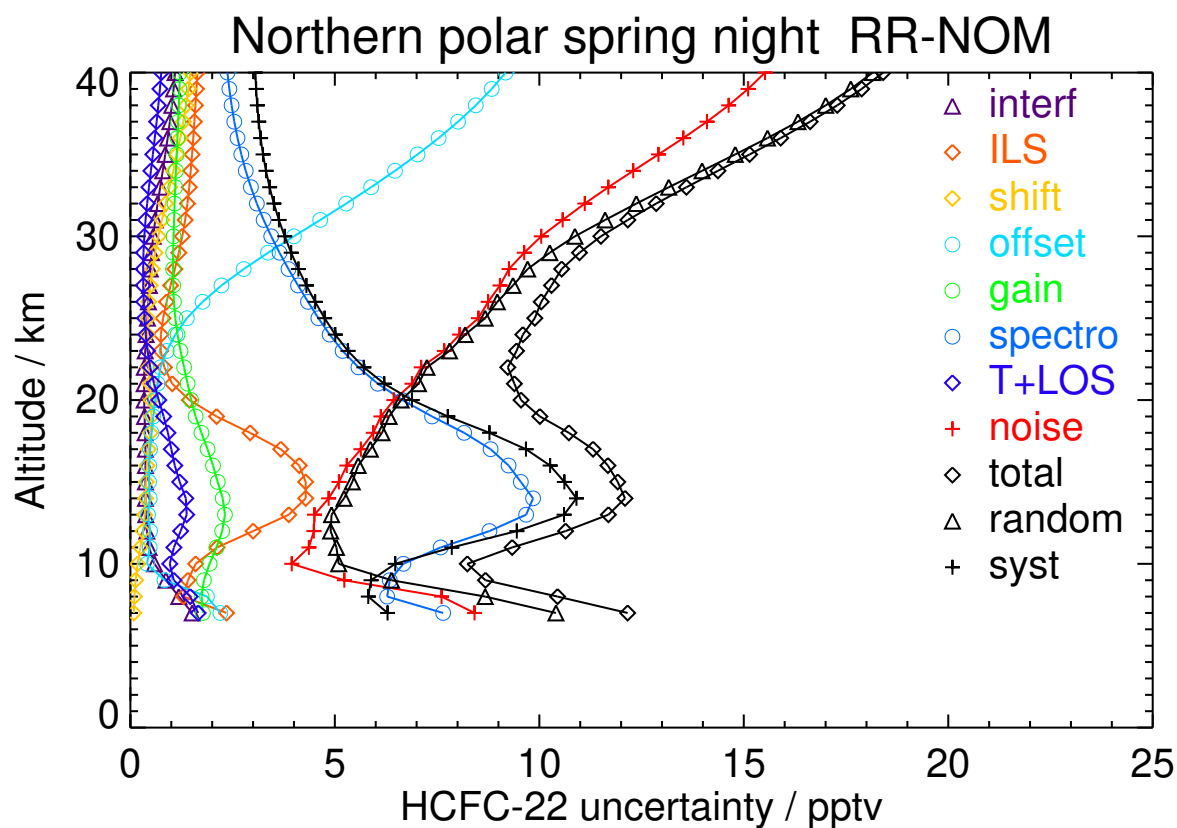

**Figure S38.** V8R\_F-22\_261 Northern polar spring night

**Table S40.** HCFC-22 error budget for Northern polar summer day. All uncertainties are  $1\sigma$ .

| altitude<br>(km) | mean target<br>(pptv) | interf<br>(pptv) | ILS<br>(pptv) | shift<br>(pptv) | offset<br>(pptv) | gain<br>(pptv) | spectro<br>(pptv) | T+LOS<br>(pptv) | noise<br>(pptv) | random<br>(pptv) | syst<br>(pptv) | total<br>(pptv) |
|------------------|-----------------------|------------------|---------------|-----------------|------------------|----------------|-------------------|-----------------|-----------------|------------------|----------------|-----------------|
| 8                | 215.54                | 1.53             | 1.76          | 0.10            | 1.42             | 2.08           | 6.45              | 0.66            | 7.42            | 7.75             | 7.00           | 10.44           |
| 11               | 195.33                | 0.78             | 3.59          | 0.13            | 0.44             | 1.37           | 8.74              | 1.60            | 4.10            | 7.36             | 7.56           | 10.55           |
| 14               | 183.08                | 0.41             | 4.17          | 0.33            | 0.33             | 2.04           | 8.70              | 1.04            | 4.43            | 4.94             | 9.69           | 10.88           |
| 17               | 167.15                | 0.35             | 4.38          | 0.39            | 0.38             | 2.10           | 9.48              | 1.07            | 5.12            | 5.39             | 10.60          | 11.89           |
| 20               | 141.62                | 0.33             | 1.58          | 0.55            | 0.48             | 1.76           | 7.71              | 0.72            | 5.72            | 5.88             | 8.02           | 9.94            |
| 23               | 123.33                | 0.35             | 0.73          | 0.52            | 0.57             | 1.34           | 5.84              | 0.45            | 6.94            | 7.04             | 6.00           | 9.25            |
| 26               | 116.40                | 0.40             | 1.07          | 0.56            | 0.73             | 1.02           | 5.03              | 0.40            | 7.58            | 7.68             | 5.21           | 9.28            |
| 29               | 104.33                | 0.47             | 1.69          | 0.81            | 1.31             | 0.81           | 4.35              | 0.42            | 8.14            | 8.32             | 4.71           | 9.56            |
| 32               | 91.05                 | 0.60             | 1.85          | 1.24            | 2.47             | 0.78           | 3.53              | 0.49            | 8.54            | 9.02             | 4.04           | 9.89            |
| 35               | 80.79                 | 0.81             | 1.64          | 1.69            | 3.92             | 0.87           | 2.90              | 0.59            | 9.55            | 10.52            | 3.41           | 11.06           |
| 38               | 73.43                 | 1.01             | 1.45          | 2.05            | 5.38             | 0.99           | 2.51              | 0.73            | 11.13           | 12.60            | 3.01           | 12.96           |
| 41               | 67.80                 | 1.18             | 1.34          | 2.30            | 6.63             | 1.10           | 2.28              | 0.84            | 12.66           | 14.56            | 2.80           | 14.83           |

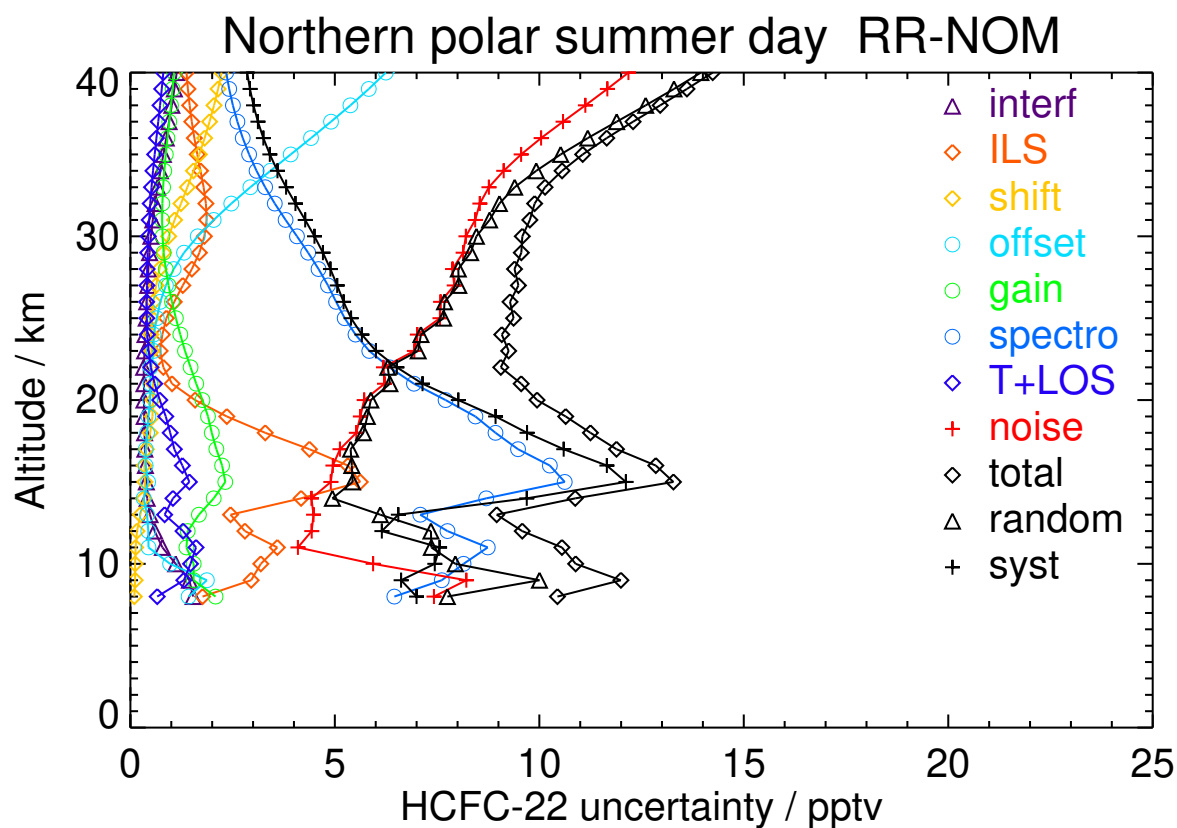

**Figure S39.** V8R\_F-22\_261 Northern polar summer day

**Table S41.** HCFC-22 error budget for Northern polar summer night. All uncertainties are  $1\sigma$ .

| altitude<br>(km) | mean target<br>(pptv) | interf<br>(pptv) | ILS<br>(pptv) | shift<br>(pptv) | offset<br>(pptv) | gain<br>(pptv) | spectro<br>(pptv) | T+LOS<br>(pptv) | noise<br>(pptv) | random<br>(pptv) | syst<br>(pptv) | total<br>(pptv) |
|------------------|-----------------------|------------------|---------------|-----------------|------------------|----------------|-------------------|-----------------|-----------------|------------------|----------------|-----------------|
| 14               | 184.73                | 0.53             | 3.44          | 0.29            | 0.61             | 2.22           | 9.15              | 1.32            | 5.42            | 5.75             | 9.96           | 11.51           |
| 17               | 165.18                | 0.36             | 3.85          | 0.41            | 0.47             | 2.11           | 9.48              | 1.34            | 5.53            | 5.81             | 10.41          | 11.92           |
| 20               | 140.38                | 0.34             | 1.85          | 0.50            | 0.48             | 1.77           | 7.75              | 0.90            | 6.10            | 6.27             | 8.12           | 10.26           |
| 23               | 122.50                | 0.36             | 0.89          | 0.51            | 0.58             | 1.37           | 6.02              | 0.50            | 7.21            | 7.29             | 6.22           | 9.58            |
| 26               | 111.09                | 0.42             | 1.12          | 0.61            | 0.86             | 1.06           | 5.07              | 0.42            | 7.97            | 8.07             | 5.28           | 9.65            |
| 29               | 95.80                 | 0.50             | 1.47          | 0.82            | 1.68             | 0.85           | 4.11              | 0.41            | 8.43            | 8.67             | 4.43           | 9.73            |
| 32               | 80.40                 | 0.62             | 1.52          | 1.11            | 3.08             | 0.84           | 3.20              | 0.45            | 9.13            | 9.74             | 3.62           | 10.39           |
| 35               | 71.13                 | 0.80             | 1.36          | 1.41            | 4.67             | 0.94           | 2.56              | 0.53            | 10.49           | 11.62            | 3.02           | 12.01           |
| 38               | 65.78                 | 0.96             | 1.21          | 1.65            | 6.16             | 1.08           | 2.21              | 0.63            | 12.29           | 13.90            | 2.69           | 14.16           |
| 41               | 62.41                 | 1.08             | 1.12          | 1.80            | 7.34             | 1.18           | 2.04              | 0.72            | 13.83           | 15.82            | 2.55           | 16.03           |

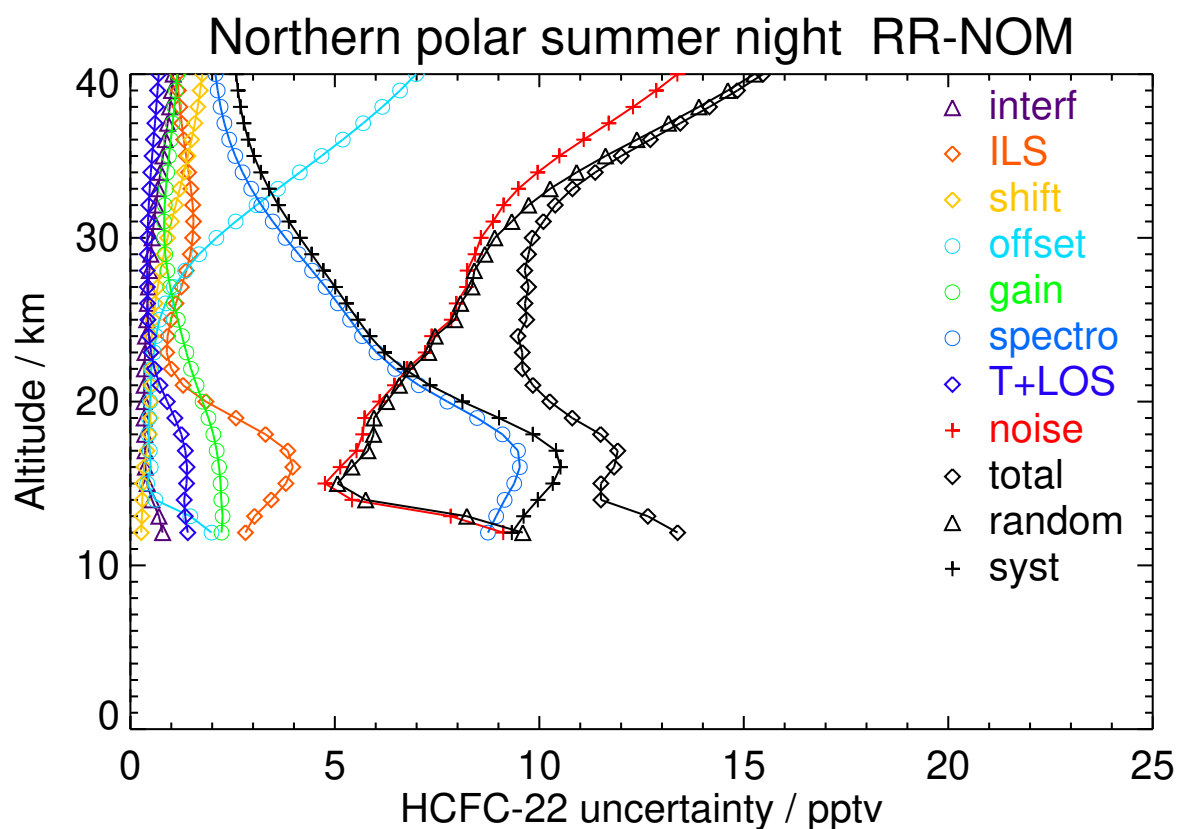

**Figure S40.** V8R\_F-22\_261 Northern polar summer night

**Table S42.** HCFC-22 error budget for Northern polar autumn day. All uncertainties are  $1\sigma$ .

| altitude<br>(km) | mean target<br>(pptv) | interf<br>(pptv) | ILS<br>(pptv) | shift<br>(pptv) | offset<br>(pptv) | gain<br>(pptv) | spectro<br>(pptv) | T+LOS<br>(pptv) | noise<br>(pptv) | random<br>(pptv) | syst<br>(pptv) | total<br>(pptv) |
|------------------|-----------------------|------------------|---------------|-----------------|------------------|----------------|-------------------|-----------------|-----------------|------------------|----------------|-----------------|
| 11               | 192.41                | 0.85             | 2.91          | 0.28            | 2.06             | 2.30           | 9.15              | 1.65            | 8.82            | 9.41             | 9.72           | 13.53           |
| 14               | 181.44                | 0.41             | 3.93          | 0.34            | 0.53             | 2.14           | 10.16             | 1.71            | 4.80            | 5.29             | 11.04          | 12.24           |
| 17               | 153.32                | 0.38             | 3.62          | 0.43            | 0.51             | 1.79           | 9.48              | 1.42            | 5.67            | 6.00             | 10.25          | 11.87           |
| 20               | 129.20                | 0.34             | 1.87          | 0.46            | 0.58             | 1.54           | 7.19              | 0.86            | 6.49            | 6.68             | 7.51           | 10.05           |
| 23               | 115.12                | 0.37             | 0.98          | 0.42            | 0.87             | 1.25           | 5.74              | 0.51            | 7.70            | 7.82             | 5.90           | 9.80            |
| 26               | 100.55                | 0.44             | 0.95          | 0.47            | 1.79             | 1.08           | 4.83              | 0.38            | 8.63            | 8.86             | 5.00           | 10.18           |
| 29               | 85.65                 | 0.54             | 1.15          | 0.60            | 3.48             | 1.01           | 3.94              | 0.34            | 9.65            | 10.32            | 4.18           | 11.13           |
| 32               | 75.32                 | 0.69             | 1.30          | 0.76            | 5.46             | 1.01           | 3.25              | 0.37            | 11.52           | 12.82            | 3.56           | 13.30           |
| 35               | 70.37                 | 0.83             | 1.37          | 0.91            | 7.20             | 1.06           | 2.81              | 0.43            | 13.50           | 15.38            | 3.20           | 15.71           |
| 38               | 68.17                 | 0.93             | 1.42          | 1.01            | 8.54             | 1.12           | 2.53              | 0.48            | 15.16           | 17.48            | 3.00           | 17.74           |
| 41               | 68.30                 | 1.03             | 1.54          | 1.35            | 8.81             | 1.12           | 2.44              | 0.57            | 15.55           | 17.99            | 2.93           | 18.22           |

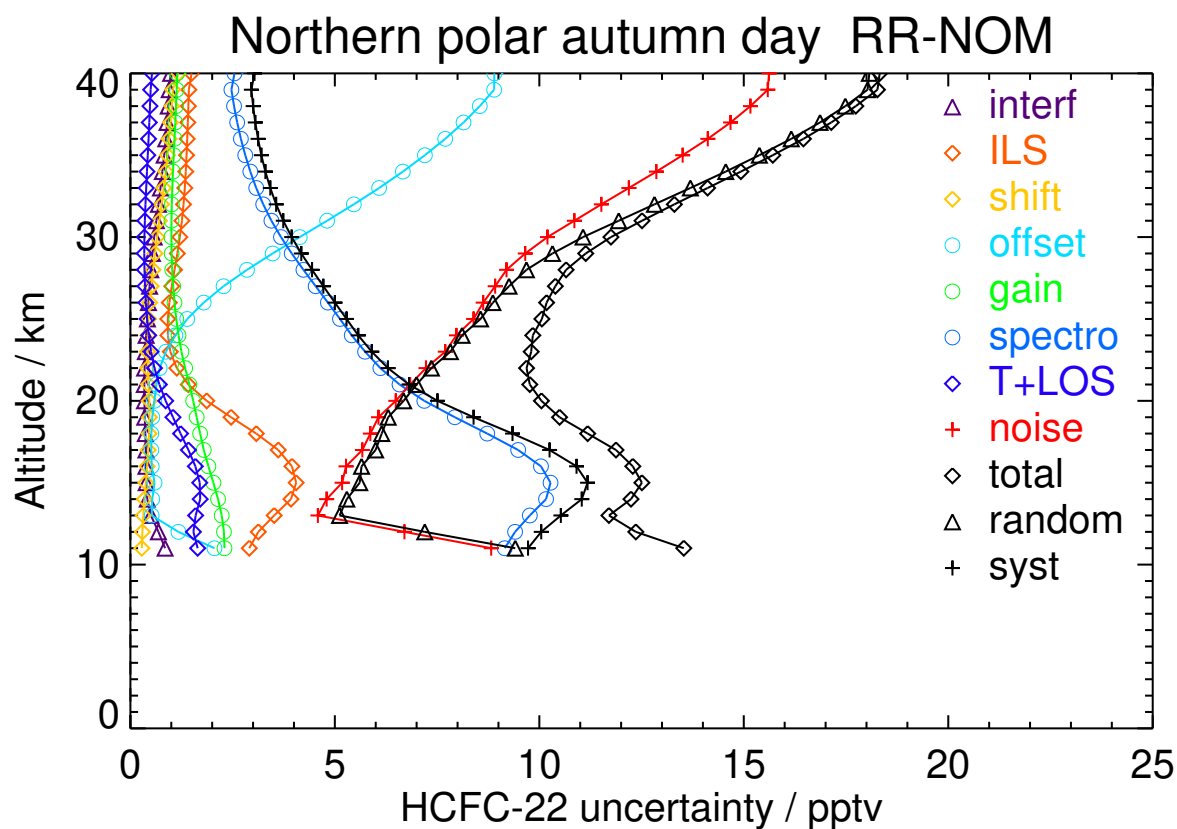

**Figure S41.** V8R\_F-22\_261 Northern polar autumn day

**Table S43.** HCFC-22 error budget for Northern polar autumn night. All uncertainties are  $1\sigma$ .

| altitude<br>(km) | mean target<br>(pptv) | interf<br>(pptv) | ILS<br>(pptv) | shift<br>(pptv) | offset<br>(pptv) | gain<br>(pptv) | spectro<br>(pptv) | T+LOS<br>(pptv) | noise<br>(pptv) | random<br>(pptv) | syst<br>(pptv) | total<br>(pptv) |
|------------------|-----------------------|------------------|---------------|-----------------|------------------|----------------|-------------------|-----------------|-----------------|------------------|----------------|-----------------|
| 11               | 189.02                | 0.84             | 2.79          | 0.29            | 2.09             | 2.31           | 8.99              | 1.51            | 8.63            | 9.26             | 9.49           | 13.26           |
| 14               | 179.37                | 0.41             | 4.15          | 0.36            | 0.56             | 2.32           | 10.23             | 1.67            | 4.82            | 5.33             | 11.21          | 12.41           |
| 17               | 148.73                | 0.38             | 3.59          | 0.44            | 0.51             | 1.89           | 9.21              | 1.36            | 5.65            | 5.93             | 10.03          | 11.65           |
| 20               | 129.94                | 0.35             | 1.64          | 0.48            | 0.60             | 1.49           | 6.90              | 0.80            | 6.45            | 6.65             | 7.16           | 9.77            |
| 23               | 113.18                | 0.37             | 0.96          | 0.44            | 0.87             | 1.26           | 5.70              | 0.50            | 7.68            | 7.82             | 5.84           | 9.76            |
| 26               | 96.77                 | 0.44             | 1.03          | 0.50            | 1.74             | 1.12           | 4.62              | 0.39            | 8.60            | 8.85             | 4.79           | 10.06           |
| 29               | 82.25                 | 0.53             | 1.22          | 0.66            | 3.32             | 1.04           | 3.59              | 0.36            | 9.49            | 10.14            | 3.83           | 10.84           |
| 32               | 71.67                 | 0.68             | 1.33          | 0.84            | 5.24             | 1.05           | 2.85              | 0.39            | 11.19           | 12.44            | 3.19           | 12.85           |
| 35               | 65.21                 | 0.82             | 1.36          | 0.99            | 6.98             | 1.11           | 2.44              | 0.45            | 13.13           | 14.96            | 2.85           | 15.23           |
| 38               | 60.71                 | 0.93             | 1.37          | 1.11            | 8.36             | 1.18           | 2.22              | 0.52            | 14.83           | 17.13            | 2.68           | 17.33           |
| 41               | 60.48                 | 1.03             | 1.41          | 1.39            | 8.82             | 1.28           | 2.21              | 0.61            | 15.47           | 17.94            | 2.68           | 18.14           |

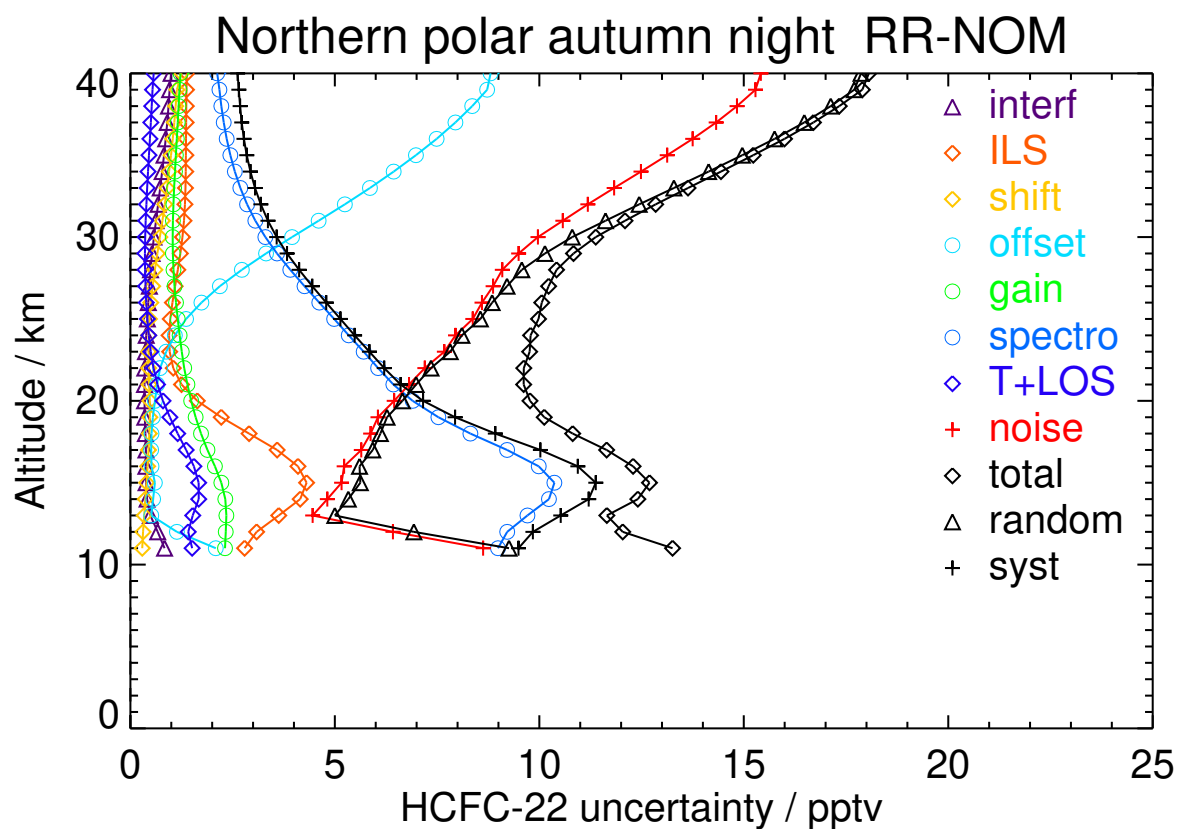

**Figure S42.** V8R\_F-22\_261 Northern polar autumn night

**Table S44.** HCFC-22 error budget for Northern midlatitude winter day. All uncertainties are  $1\sigma$ .

| altitude<br>(km) | mean target<br>(pptv) | interf<br>(pptv) | ILS<br>(pptv) | shift<br>(pptv) | offset<br>(pptv) | gain<br>(pptv) | spectro<br>(pptv) | T+LOS<br>(pptv) | noise<br>(pptv) | random<br>(pptv) | syst<br>(pptv) | total<br>(pptv) |
|------------------|-----------------------|------------------|---------------|-----------------|------------------|----------------|-------------------|-----------------|-----------------|------------------|----------------|-----------------|
| 8                | 200.94                | 1.02             | 1.27          | 0.20            | 0.82             | 1.75           | 6.73              | 1.08            | 5.06            | 6.36             | 6.16           | 8.86            |
| 11               | 191.87                | 0.56             | 2.30          | 0.23            | 0.59             | 2.21           | 7.77              | 1.07            | 4.32            | 6.32             | 7.15           | 9.54            |
| 14               | 174.70                | 0.38             | 4.13          | 0.34            | 0.44             | 2.29           | 9.75              | 1.24            | 4.76            | 5.13             | 10.75          | 11.91           |
| 17               | 159.35                | 0.36             | 3.64          | 0.40            | 0.47             | 2.08           | 9.00              | 0.98            | 5.47            | 5.85             | 9.79           | 11.40           |
| 20               | 137.70                | 0.35             | 2.08          | 0.55            | 0.56             | 1.83           | 7.17              | 0.78            | 6.22            | 6.50             | 7.54           | 9.96            |
| 23               | 131.06                | 0.37             | 1.20          | 0.60            | 0.69             | 1.41           | 5.72              | 0.48            | 7.12            | 7.27             | 5.93           | 9.38            |
| 26               | 122.27                | 0.43             | 1.33          | 0.69            | 1.10             | 1.17           | 5.15              | 0.40            | 7.99            | 8.16             | 5.38           | 9.77            |
| 29               | 115.76                | 0.52             | 1.70          | 0.91            | 2.13             | 1.02           | 4.56              | 0.39            | 8.42            | 8.79             | 4.92           | 10.08           |
| 32               | 108.24                | 0.64             | 1.87          | 1.16            | 3.78             | 1.03           | 4.05              | 0.41            | 9.29            | 10.15            | 4.54           | 11.12           |
| 35               | 98.35                 | 0.81             | 1.88          | 1.39            | 5.57             | 1.12           | 3.63              | 0.47            | 10.93           | 12.40            | 4.19           | 13.09           |
| 38               | 90.27                 | 0.94             | 1.86          | 1.55            | 7.15             | 1.20           | 3.31              | 0.54            | 12.82           | 14.82            | 3.92           | 15.33           |
| 41               | 84.85                 | 1.03             | 1.85          | 1.64            | 8.32             | 1.26           | 3.09              | 0.59            | 14.27           | 16.66            | 3.76           | 17.08           |

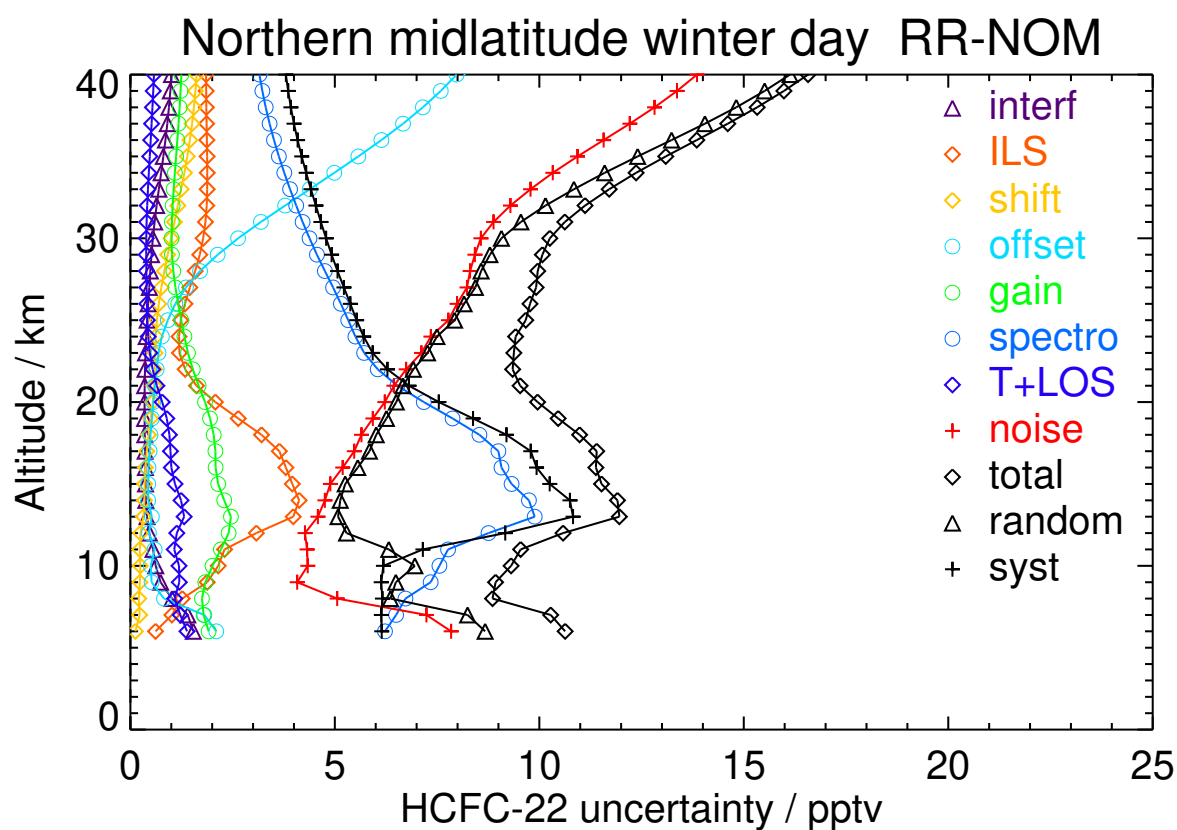

**Figure S43.** V8R\_F-22\_261 Northern midlatitude winter day

**Table S45.** HCFC-22 error budget for Northern midlatitude winter night. All uncertainties are  $1\sigma$ .

| altitude<br>(km) | mean target<br>(pptv) | interf<br>(pptv) | ILS<br>(pptv) | shift<br>(pptv) | offset<br>(pptv) | gain<br>(pptv) | spectro<br>(pptv) | T+LOS<br>(pptv) | noise<br>(pptv) | random<br>(pptv) | syst<br>(pptv) | total<br>(pptv) |
|------------------|-----------------------|------------------|---------------|-----------------|------------------|----------------|-------------------|-----------------|-----------------|------------------|----------------|-----------------|
| 8                | 202.08                | 0.98             | 1.44          | 0.12            | 0.75             | 1.83           | 7.21              | 1.11            | 4.78            | 6.48             | 6.41           | 9.11            |
| 11               | 189.65                | 0.56             | 2.21          | 0.22            | 0.53             | 2.34           | 7.84              | 1.08            | 4.29            | 6.58             | 6.98           | 9.60            |
| 14               | 176.88                | 0.38             | 3.84          | 0.34            | 0.43             | 2.31           | 9.33              | 1.13            | 4.76            | 5.33             | 10.15          | 11.47           |
| 17               | 160.88                | 0.36             | 3.67          | 0.36            | 0.46             | 2.05           | 9.09              | 0.96            | 5.49            | 5.80             | 9.91           | 11.48           |
| 20               | 139.69                | 0.34             | 2.24          | 0.50            | 0.58             | 1.78           | 7.63              | 0.80            | 6.26            | 6.61             | 7.95           | 10.34           |
| 23               | 130.48                | 0.37             | 1.25          | 0.56            | 0.71             | 1.35           | 6.03              | 0.49            | 7.16            | 7.32             | 6.21           | 9.60            |
| 26               | 123.59                | 0.43             | 1.37          | 0.64            | 1.13             | 1.08           | 5.25              | 0.41            | 8.11            | 8.25             | 5.50           | 9.92            |
| 29               | 112.39                | 0.51             | 1.81          | 0.88            | 2.10             | 0.98           | 4.48              | 0.41            | 8.51            | 8.85             | 4.90           | 10.11           |
| 32               | 101.89                | 0.65             | 1.97          | 1.19            | 3.66             | 0.97           | 3.80              | 0.45            | 9.22            | 10.04            | 4.34           | 10.94           |
| 35               | 93.70                 | 0.82             | 1.94          | 1.49            | 5.39             | 1.02           | 3.29              | 0.53            | 10.69           | 12.12            | 3.90           | 12.73           |
| 38               | 87.83                 | 0.98             | 1.90          | 1.70            | 6.96             | 1.07           | 2.97              | 0.62            | 12.53           | 14.50            | 3.62           | 14.94           |
| 41               | 84.15                 | 1.08             | 1.88          | 1.82            | 8.15             | 1.13           | 2.77              | 0.68            | 14.04           | 16.40            | 3.46           | 16.77           |

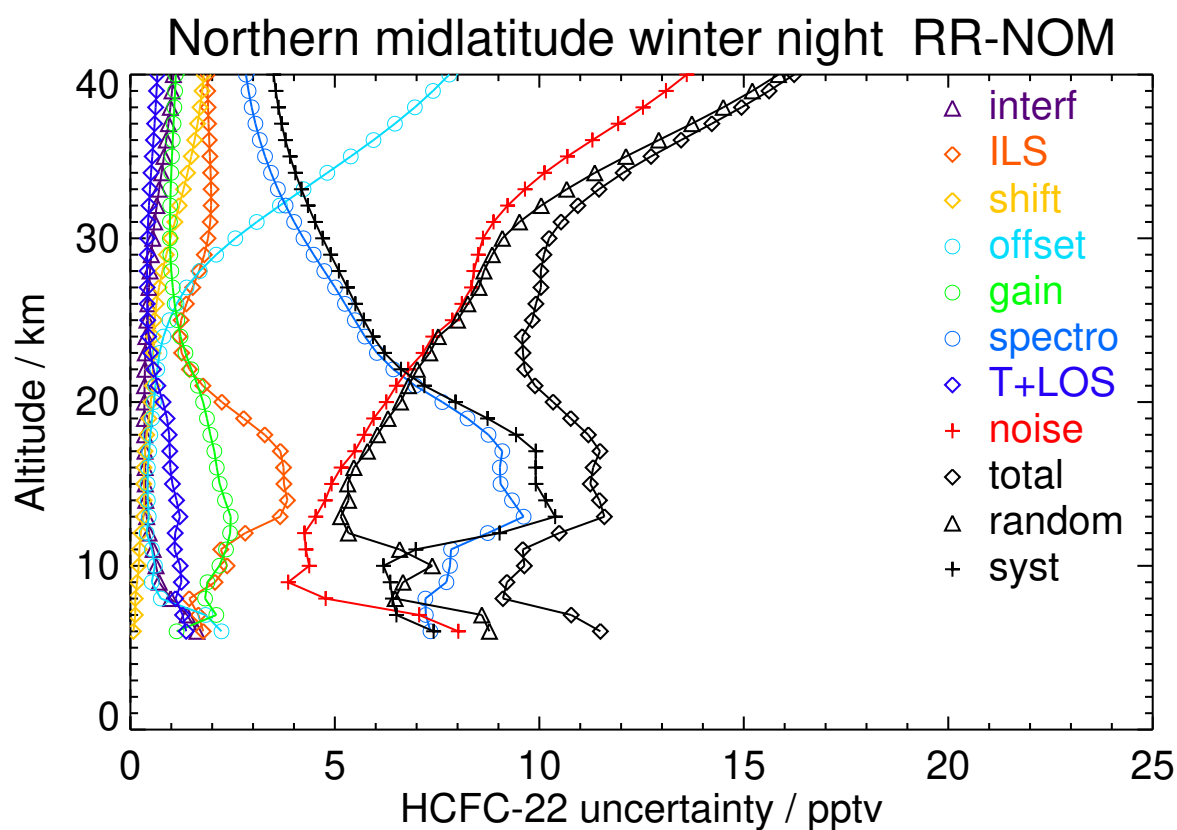

**Figure S44.** V8R\_F-22\_261 Northern midlatitude winter night

**Table S46.** HCFC-22 error budget for Northern midlatitude spring day. All uncertainties are  $1\sigma$ .

| altitude<br>(km) | mean target<br>(pptv) | interf<br>(pptv) | ILS<br>(pptv) | shift<br>(pptv) | offset<br>(pptv) | gain<br>(pptv) | spectro<br>(pptv) | T+LOS<br>(pptv) | noise<br>(pptv) | random<br>(pptv) | syst<br>(pptv) | total<br>(pptv) |
|------------------|-----------------------|------------------|---------------|-----------------|------------------|----------------|-------------------|-----------------|-----------------|------------------|----------------|-----------------|
| 8                | 196.02                | 1.33             | 1.28          | 0.08            | 1.66             | 1.55           | 6.49              | 1.19            | 7.45            | 8.41             | 6.08           | 10.37           |
| 11               | 188.03                | 0.55             | 1.87          | 0.19            | 0.43             | 1.94           | 7.24              | 1.08            | 4.31            | 6.33             | 6.31           | 8.94            |
| 14               | 179.49                | 0.39             | 3.81          | 0.32            | 0.45             | 2.26           | 9.48              | 1.22            | 4.73            | 5.25             | 10.31          | 11.57           |
| 17               | 165.21                | 0.36             | 3.69          | 0.37            | 0.48             | 2.14           | 9.60              | 1.09            | 5.49            | 5.82             | 10.41          | 11.92           |
| 20               | 137.47                | 0.34             | 2.01          | 0.48            | 0.60             | 1.79           | 8.04              | 0.87            | 6.30            | 6.56             | 8.37           | 10.63           |
| 23               | 122.17                | 0.36             | 1.08          | 0.51            | 0.72             | 1.32           | 5.95              | 0.51            | 7.23            | 7.39             | 6.09           | 9.58            |
| 26               | 116.52                | 0.44             | 1.13          | 0.63            | 1.18             | 1.03           | 4.97              | 0.39            | 8.29            | 8.46             | 5.14           | 9.90            |
| 29               | 108.59                | 0.51             | 1.52          | 0.87            | 2.26             | 0.94           | 4.32              | 0.38            | 8.69            | 9.08             | 4.60           | 10.18           |
| 32               | 96.46                 | 0.64             | 1.77          | 1.17            | 3.85             | 0.97           | 3.71              | 0.43            | 9.58            | 10.46            | 4.13           | 11.25           |
| 35               | 85.36                 | 0.82             | 1.83          | 1.46            | 5.53             | 1.02           | 3.21              | 0.53            | 11.11           | 12.57            | 3.72           | 13.11           |
| 38               | 76.50                 | 0.98             | 1.84          | 1.68            | 7.04             | 1.09           | 2.86              | 0.62            | 12.91           | 14.88            | 3.44           | 15.27           |
| 41               | 70.53                 | 1.09             | 1.84          | 1.82            | 8.18             | 1.14           | 2.63              | 0.69            | 14.37           | 16.71            | 3.28           | 17.03           |

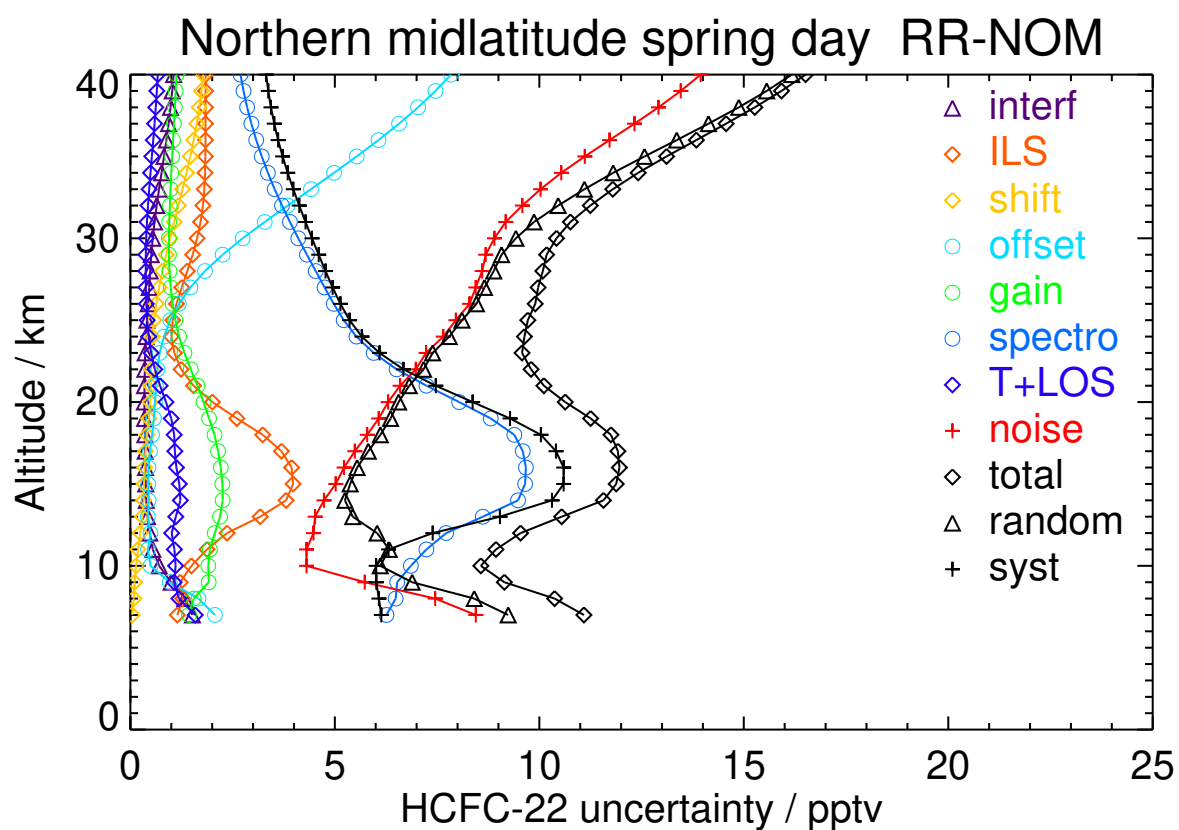

**Figure S45.** V8R\_F-22\_261 Northern midlatitude spring day

**Table S47.** HCFC-22 error budget for Northern midlatitude spring night. All uncertainties are  $1\sigma$ .

| altitude<br>(km) | mean target<br>(pptv) | interf<br>(pptv) | ILS<br>(pptv) | shift<br>(pptv) | offset<br>(pptv) | gain<br>(pptv) | spectro<br>(pptv) | T+LOS<br>(pptv) | noise<br>(pptv) | random<br>(pptv) | syst<br>(pptv) | total<br>(pptv) |
|------------------|-----------------------|------------------|---------------|-----------------|------------------|----------------|-------------------|-----------------|-----------------|------------------|----------------|-----------------|
| 8                | 194.90                | 1.28             | 1.34          | 0.08            | 1.81             | 1.73           | 6.35              | 1.17            | 7.50            | 8.48             | 5.98           | 10.38           |
| 11               | 188.76                | 0.56             | 1.52          | 0.18            | 0.45             | 1.84           | 6.81              | 0.95            | 4.34            | 5.81             | 6.21           | 8.51            |
| 14               | 177.06                | 0.38             | 4.18          | 0.33            | 0.43             | 2.43           | 9.98              | 1.32            | 4.72            | 5.25             | 10.95          | 12.14           |
| 17               | 155.83                | 0.36             | 3.47          | 0.39            | 0.45             | 1.92           | 9.12              | 1.05            | 5.45            | 5.70             | 9.89           | 11.41           |
| 20               | 136.71                | 0.34             | 1.87          | 0.51            | 0.56             | 2.02           | 7.37              | 0.76            | 6.27            | 6.55             | 7.72           | 10.12           |
| 23               | 123.45                | 0.36             | 1.36          | 0.54            | 0.72             | 2.30           | 5.88              | 0.48            | 7.21            | 7.48             | 6.25           | 9.74            |
| 26               | 116.17                | 0.43             | 1.34          | 0.63            | 1.20             | 1.58           | 4.96              | 0.39            | 8.27            | 8.46             | 5.27           | 9.97            |
| 29               | 106.07                | 0.50             | 1.57          | 0.85            | 2.27             | 1.06           | 4.16              | 0.38            | 8.71            | 9.09             | 4.51           | 10.15           |
| 32               | 94.83                 | 0.64             | 1.72          | 1.16            | 3.86             | 0.93           | 3.44              | 0.43            | 9.58            | 10.45            | 3.90           | 11.15           |
| 35               | 84.32                 | 0.82             | 1.72          | 1.46            | 5.54             | 0.95           | 2.94              | 0.54            | 11.09           | 12.55            | 3.45           | 13.01           |
| 38               | 76.75                 | 0.98             | 1.68          | 1.69            | 7.03             | 0.99           | 2.64              | 0.65            | 12.89           | 14.85            | 3.18           | 15.18           |
| 41               | 72.01                 | 1.09             | 1.67          | 1.84            | 8.17             | 1.03           | 2.47              | 0.73            | 14.34           | 16.68            | 3.05           | 16.95           |

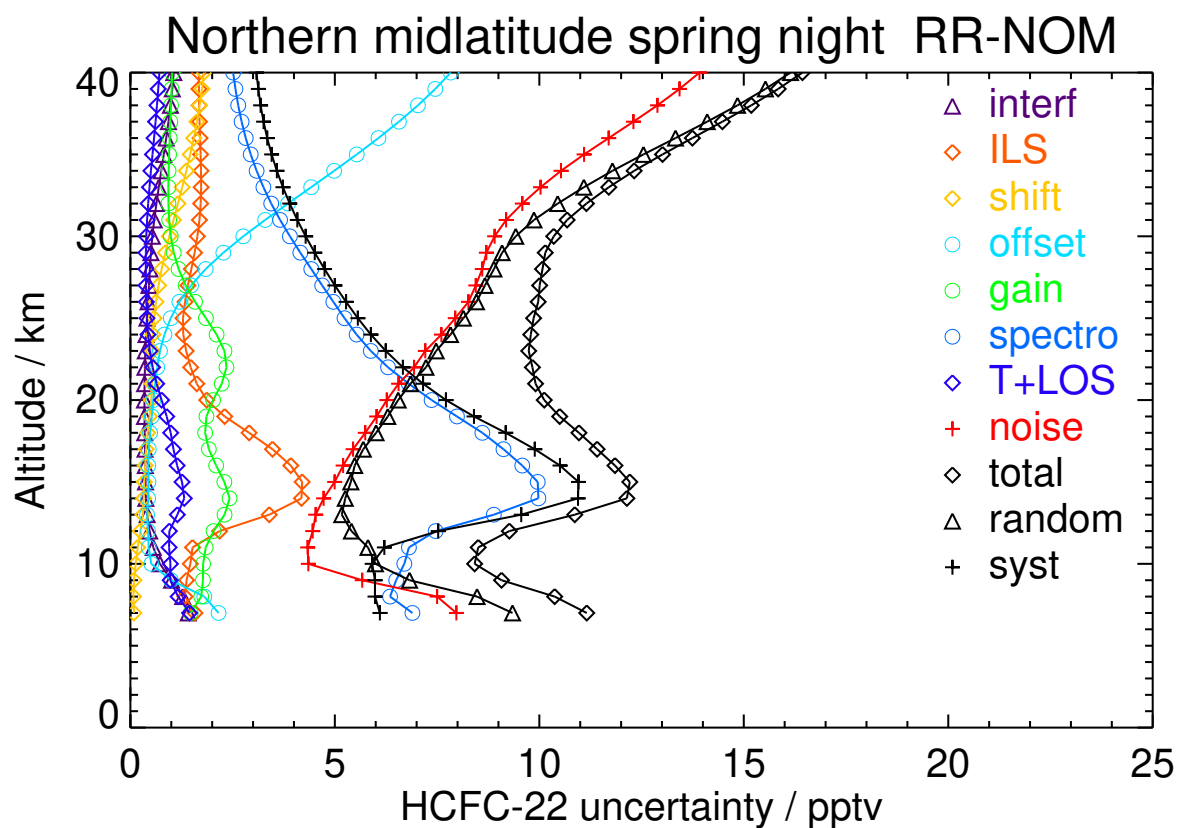

**Figure S46.** V8R\_F-22\_261 Northern midlatitude spring night

**Table S48.** HCFC-22 error budget for Northern midlatitude summer day. All uncertainties are  $1\sigma$ .

| altitude<br>(km) | mean target<br>(pptv) | interf<br>(pptv) | ILS<br>(pptv) | shift<br>(pptv) | offset<br>(pptv) | gain<br>(pptv) | spectro<br>(pptv) | T+LOS<br>(pptv) | noise<br>(pptv) | random<br>(pptv) | syst<br>(pptv) | total<br>(pptv) |
|------------------|-----------------------|------------------|---------------|-----------------|------------------|----------------|-------------------|-----------------|-----------------|------------------|----------------|-----------------|
| 8                | 202.45                | 1.65             | 1.92          | 0.16            | 1.73             | 1.64           | 7.01              | 1.13            | 8.08            | 9.51             | 6.12           | 11.31           |
| 11               | 205.68                | 0.76             | 3.64          | 0.25            | 0.51             | 1.26           | 11.17             | 2.21            | 4.09            | 6.62             | 10.88          | 12.73           |
| 14               | 212.21                | 0.55             | 2.49          | 0.26            | 0.46             | 2.82           | 8.68              | 0.98            | 4.81            | 5.65             | 9.06           | 10.68           |
| 17               | 194.16                | 0.40             | 3.72          | 0.23            | 0.55             | 2.81           | 10.90             | 1.36            | 5.78            | 6.11             | 11.79          | 13.28           |
| 20               | 159.78                | 0.34             | 2.92          | 0.37            | 0.61             | 2.20           | 9.92              | 1.20            | 6.34            | 6.57             | 10.52          | 12.41           |
| 23               | 134.23                | 0.36             | 1.87          | 0.55            | 0.64             | 1.70           | 7.45              | 0.76            | 7.07            | 7.26             | 7.79           | 10.65           |
| 26               | 120.98                | 0.42             | 1.49          | 0.70            | 0.92             | 1.08           | 5.61              | 0.51            | 7.95            | 8.08             | 5.88           | 9.99            |
| 29               | 113.96                | 0.50             | 1.60          | 0.96            | 1.74             | 0.85           | 4.48              | 0.42            | 8.38            | 8.65             | 4.81           | 9.90            |
| 32               | 105.92                | 0.62             | 1.66          | 1.24            | 3.14             | 0.88           | 3.80              | 0.42            | 9.01            | 9.66             | 4.22           | 10.54           |
| 35               | 97.98                 | 0.79             | 1.66          | 1.53            | 4.76             | 1.01           | 3.35              | 0.49            | 10.30           | 11.50            | 3.84           | 12.12           |
| 38               | 92.24                 | 0.95             | 1.65          | 1.76            | 6.28             | 1.13           | 3.05              | 0.59            | 12.08           | 13.79            | 3.61           | 14.25           |
| 41               | 88.45                 | 1.07             | 1.66          | 1.90            | 7.48             | 1.22           | 2.87              | 0.66            | 13.65           | 15.74            | 3.47           | 16.12           |

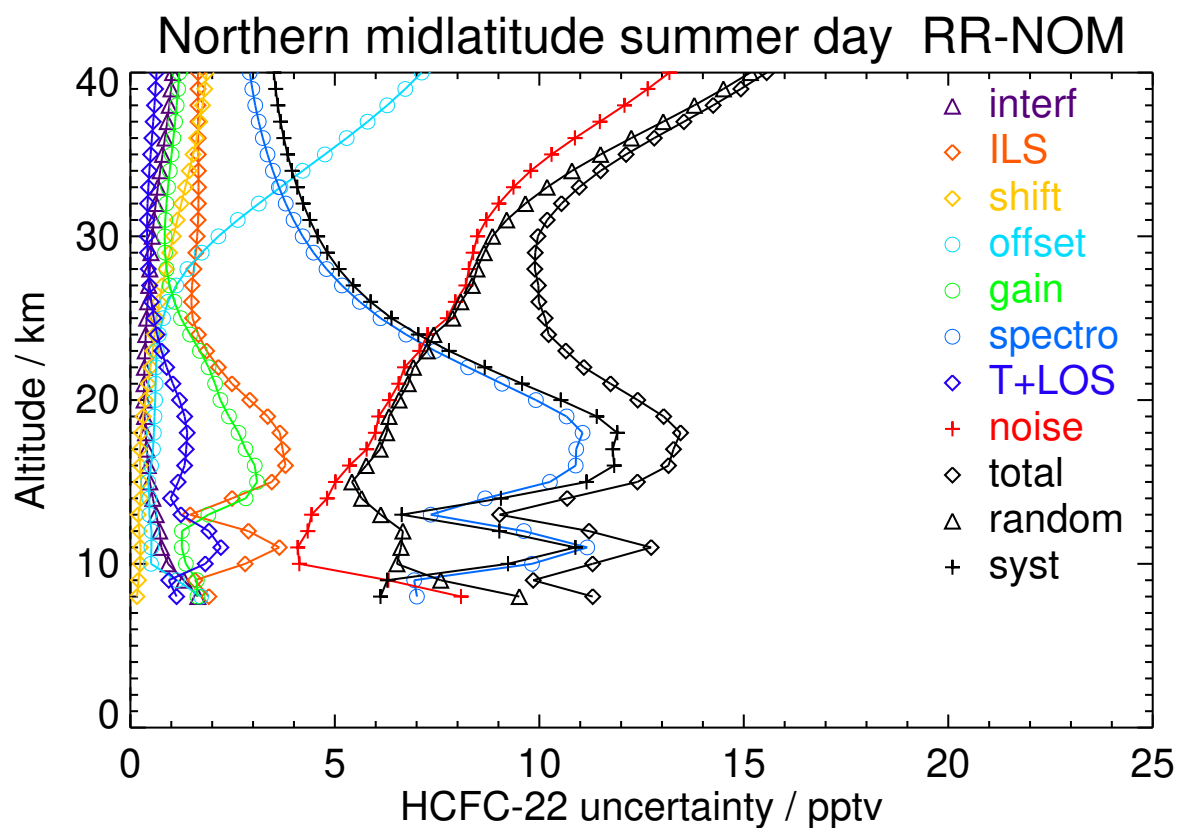

**Figure S47.** V8R\_F-22\_261 Northern midlatitude summer day

**Table S49.** HCFC-22 error budget for Northern midlatitude summer night. All uncertainties are  $1\sigma$ .

| altitude<br>(km) | mean target<br>(pptv) | interf<br>(pptv) | ILS<br>(pptv) | shift<br>(pptv) | offset<br>(pptv) | gain<br>(pptv) | spectro<br>(pptv) | T+LOS<br>(pptv) | noise<br>(pptv) | random<br>(pptv) | syst<br>(pptv) | total<br>(pptv) |
|------------------|-----------------------|------------------|---------------|-----------------|------------------|----------------|-------------------|-----------------|-----------------|------------------|----------------|-----------------|
| 8                | 213.56                | 1.61             | 0.46          | 0.25            | 1.98             | 2.17           | 6.53              | 1.02            | 7.81            | 8.55             | 6.57           | 10.78           |
| 11               | 206.46                | 0.93             | 5.17          | 0.32            | 0.71             | 0.92           | 13.97             | 2.64            | 4.50            | 8.57             | 13.34          | 15.86           |
| 14               | 206.48                | 0.60             | 1.69          | 0.20            | 0.44             | 2.10           | 7.32              | 1.21            | 4.94            | 6.78             | 6.43           | 9.35            |
| 17               | 190.45                | 0.39             | 4.07          | 0.27            | 0.51             | 2.65           | 11.37             | 1.50            | 5.70            | 6.11             | 12.28          | 13.72           |
| 20               | 159.67                | 0.33             | 2.89          | 0.39            | 0.55             | 1.96           | 9.93              | 1.18            | 6.36            | 6.57             | 10.48          | 12.37           |
| 23               | 135.86                | 0.36             | 1.74          | 0.51            | 0.62             | 1.48           | 7.66              | 0.75            | 7.16            | 7.30             | 7.95           | 10.79           |
| 26               | 122.37                | 0.42             | 1.46          | 0.66            | 0.92             | 1.06           | 5.79              | 0.52            | 8.11            | 8.23             | 6.04           | 10.21           |
| 29               | 113.84                | 0.50             | 1.58          | 0.93            | 1.73             | 0.85           | 4.52              | 0.43            | 8.49            | 8.75             | 4.85           | 10.00           |
| 32               | 106.72                | 0.63             | 1.63          | 1.24            | 3.10             | 0.86           | 3.76              | 0.44            | 9.13            | 9.77             | 4.15           | 10.61           |
| 35               | 101.04                | 0.80             | 1.55          | 1.54            | 4.69             | 0.94           | 3.31              | 0.54            | 10.41           | 11.58            | 3.73           | 12.17           |
| 38               | 97.28                 | 0.96             | 1.46          | 1.78            | 6.19             | 1.03           | 3.06              | 0.64            | 12.18           | 13.84            | 3.48           | 14.27           |
| 41               | 94.68                 | 1.08             | 1.41          | 1.93            | 7.38             | 1.10           | 2.93              | 0.73            | 13.73           | 15.78            | 3.35           | 16.13           |

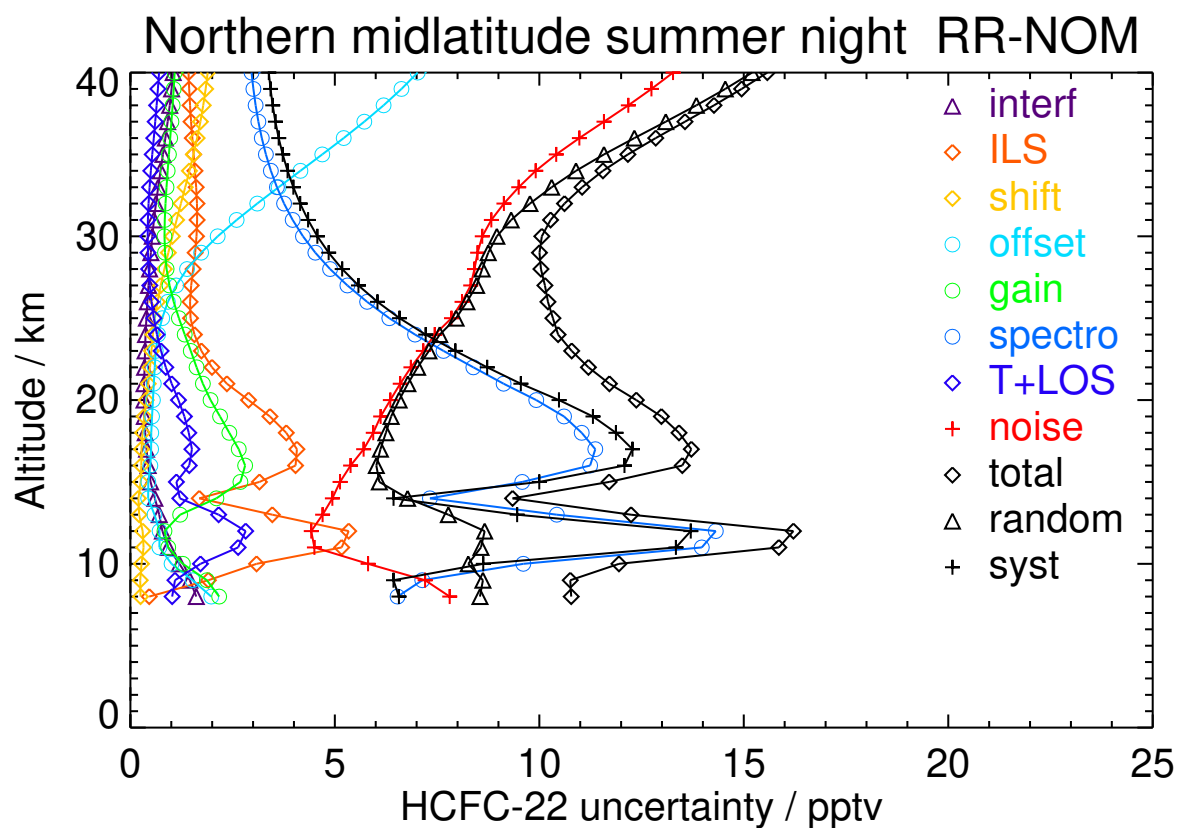

**Figure S48.** V8R\_F-22\_261 Northern midlatitude summer night

**Table S50.** HCFC-22 error budget for Northern midlatitude autumn day. All uncertainties are  $1\sigma$ .

| altitude<br>(km) | mean target<br>(pptv) | interf<br>(pptv) | ILS<br>(pptv) | shift<br>(pptv) | offset<br>(pptv) | gain<br>(pptv) | spectro<br>(pptv) | T+LOS<br>(pptv) | noise<br>(pptv) | random<br>(pptv) | syst<br>(pptv) | total<br>(pptv) |
|------------------|-----------------------|------------------|---------------|-----------------|------------------|----------------|-------------------|-----------------|-----------------|------------------|----------------|-----------------|
| 8                | 206.20                | 1.60             | 1.28          | 0.29            | 1.78             | 1.83           | 6.77              | 0.93            | 8.08            | 8.85             | 6.66           | 11.08           |
| 11               | 209.46                | 0.78             | 3.68          | 0.31            | 0.60             | 1.04           | 11.57             | 2.37            | 4.20            | 7.53             | 10.77          | 13.15           |
| 14               | 210.43                | 0.55             | 2.47          | 0.27            | 0.51             | 2.51           | 8.82              | 1.01            | 4.90            | 5.61             | 9.19           | 10.77           |
| 17               | 190.97                | 0.40             | 3.97          | 0.32            | 0.56             | 2.65           | 11.26             | 1.44            | 5.69            | 6.02             | 12.18          | 13.58           |
| 20               | 158.58                | 0.34             | 2.83          | 0.40            | 0.63             | 2.11           | 9.76              | 1.17            | 6.39            | 6.65             | 10.32          | 12.27           |
| 23               | 133.48                | 0.35             | 1.78          | 0.46            | 0.73             | 1.73           | 7.53              | 0.72            | 7.26            | 7.45             | 7.84           | 10.82           |
| 26               | 123.08                | 0.42             | 1.56          | 0.62            | 1.20             | 1.32           | 5.83              | 0.49            | 8.13            | 8.31             | 6.11           | 10.32           |
| 29               | 116.42                | 0.50             | 1.62          | 0.81            | 2.35             | 1.03           | 4.79              | 0.38            | 8.69            | 9.09             | 5.12           | 10.43           |
| 32               | 109.61                | 0.63             | 1.65          | 1.05            | 4.03             | 0.98           | 4.14              | 0.40            | 9.73            | 10.63            | 4.53           | 11.55           |
| 35               | 102.30                | 0.78             | 1.60          | 1.27            | 5.75             | 1.03           | 3.70              | 0.47            | 11.45           | 12.92            | 4.12           | 13.56           |
| 38               | 96.28                 | 0.92             | 1.58          | 1.44            | 7.24             | 1.09           | 3.39              | 0.56            | 13.27           | 15.24            | 3.82           | 15.71           |
| 41               | 91.82                 | 1.01             | 1.57          | 1.55            | 8.33             | 1.13           | 3.18              | 0.63            | 14.66           | 17.00            | 3.64           | 17.38           |

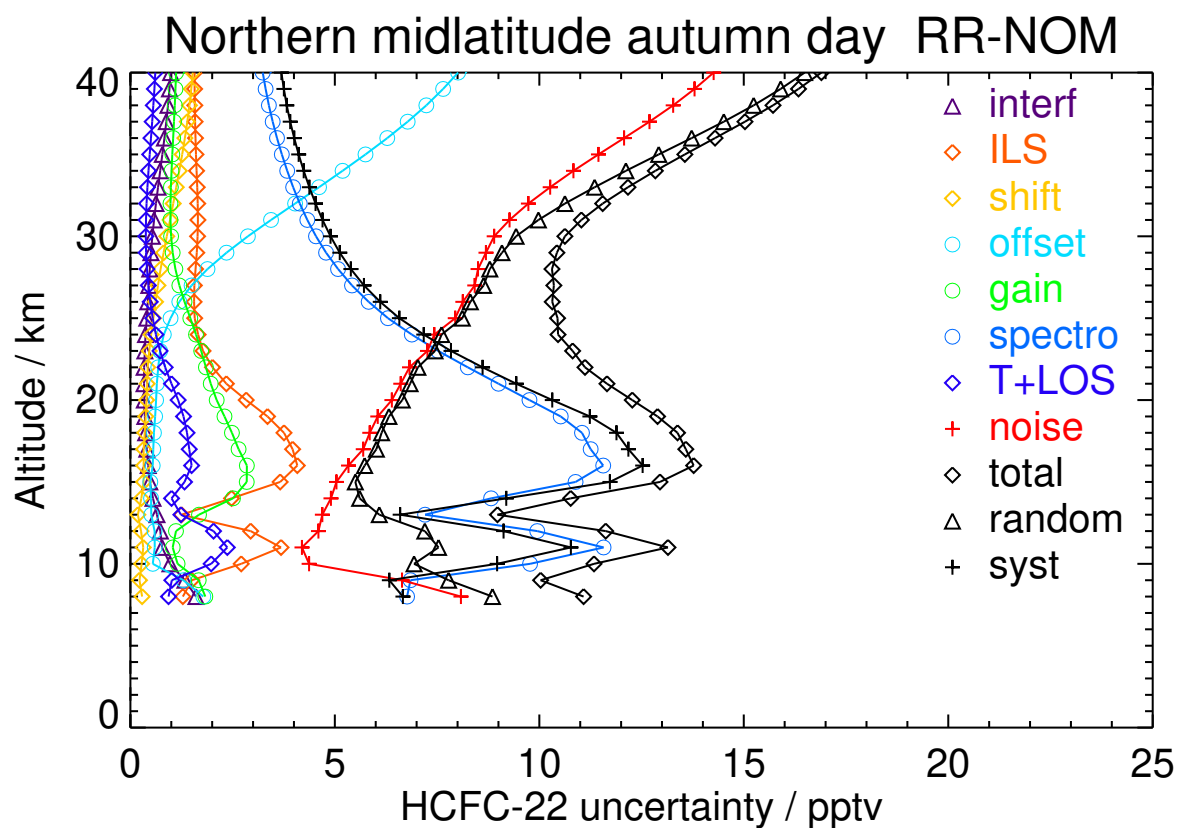

**Figure S49.** V8R\_F-22\_261 Northern midlatitude autumn day

**Table S51.** HCFC-22 error budget for Northern midlatitude autumn night. All uncertainties are  $1\sigma$ .

| altitude<br>(km) | mean target<br>(pptv) | interf<br>(pptv) | ILS<br>(pptv) | shift<br>(pptv) | offset<br>(pptv) | gain<br>(pptv) | spectro<br>(pptv) | T+LOS<br>(pptv) | noise<br>(pptv) | random<br>(pptv) | syst<br>(pptv) | total<br>(pptv) |
|------------------|-----------------------|------------------|---------------|-----------------|------------------|----------------|-------------------|-----------------|-----------------|------------------|----------------|-----------------|
| 8                | 200.58                | 1.55             | 1.90          | 0.31            | 1.79             | 1.84           | 7.60              | 1.27            | 7.75            | 9.61             | 6.31           | 11.50           |
| 11               | 209.98                | 0.77             | 2.99          | 0.35            | 0.61             | 1.28           | 10.65             | 2.01            | 4.41            | 7.37             | 9.71           | 12.19           |
| 14               | 204.62                | 0.52             | 2.99          | 0.28            | 0.48             | 2.62           | 9.19              | 1.15            | 4.96            | 5.73             | 9.69           | 11.26           |
| 17               | 182.93                | 0.39             | 3.85          | 0.33            | 0.52             | 2.47           | 10.79             | 1.34            | 5.62            | 5.99             | 11.64          | 13.09           |
| 20               | 154.53                | 0.34             | 2.54          | 0.40            | 0.62             | 1.91           | 9.47              | 1.06            | 6.39            | 6.60             | 9.94           | 11.93           |
| 23               | 130.82                | 0.35             | 1.66          | 0.46            | 0.74             | 1.59           | 7.40              | 0.69            | 7.26            | 7.45             | 7.66           | 10.68           |
| 26               | 121.19                | 0.42             | 1.57          | 0.61            | 1.20             | 1.29           | 5.70              | 0.48            | 8.20            | 8.40             | 5.98           | 10.30           |
| 29               | 114.84                | 0.50             | 1.66          | 0.80            | 2.33             | 1.06           | 4.61              | 0.38            | 8.74            | 9.13             | 4.98           | 10.40           |
| 32               | 109.20                | 0.63             | 1.70          | 1.05            | 3.97             | 1.03           | 3.95              | 0.40            | 9.74            | 10.62            | 4.39           | 11.49           |
| 35               | 104.50                | 0.78             | 1.67          | 1.28            | 5.67             | 1.08           | 3.53              | 0.47            | 11.38           | 12.83            | 4.01           | 13.44           |
| 38               | 100.42                | 0.93             | 1.65          | 1.47            | 7.15             | 1.14           | 3.26              | 0.57            | 13.20           | 15.14            | 3.76           | 15.60           |
| 41               | 97.36                 | 1.03             | 1.64          | 1.59            | 8.26             | 1.18           | 3.09              | 0.64            | 14.61           | 16.92            | 3.61           | 17.30           |

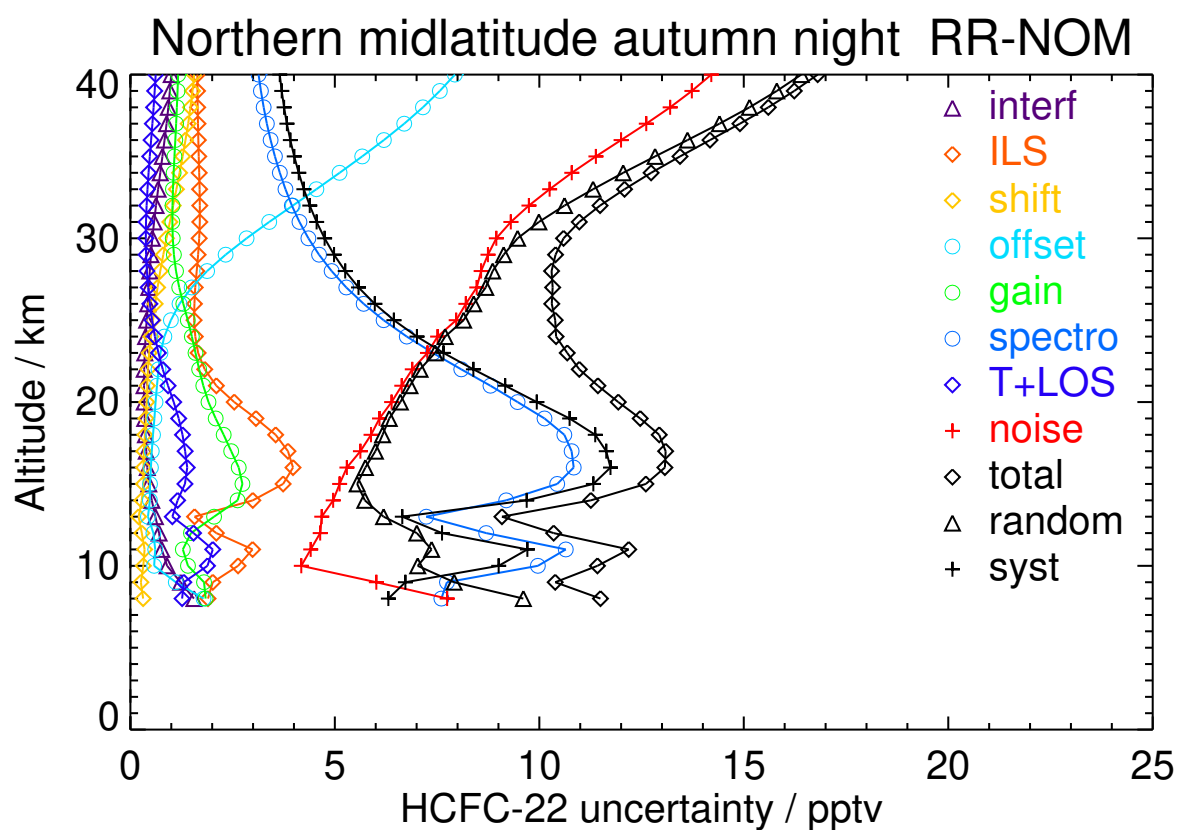

**Figure S50.** V8R\_F-22\_261 Northern midlatitude autumn night

**Table S52.** HCFC-22 error budget for Tropics day. All uncertainties are  $1\sigma$ .

| altitude<br>(km) | mean target<br>(pptv) | interf<br>(pptv) | ILS<br>(pptv) | shift<br>(pptv) | offset<br>(pptv) | gain<br>(pptv) | spectro<br>(pptv) | T+LOS<br>(pptv) | noise<br>(pptv) | random<br>(pptv) | syst<br>(pptv) | total<br>(pptv) |
|------------------|-----------------------|------------------|---------------|-----------------|------------------|----------------|-------------------|-----------------|-----------------|------------------|----------------|-----------------|
| 11               | 192.81                | 1.11             | 2.02          | 0.15            | 1.19             | 1.40           | 7.84              | 1.67            | 6.47            | 8.03             | 7.09           | 10.71           |
| 14               | 197.97                | 0.59             | 1.29          | 0.20            | 0.50             | 1.99           | 6.58              | 1.22            | 5.01            | 6.13             | 6.21           | 8.73            |
| 17               | 194.48                | 0.43             | 3.10          | 0.19            | 0.66             | 2.37           | 10.05             | 1.65            | 6.23            | 6.65             | 10.68          | 12.58           |
| 20               | 179.23                | 0.35             | 2.91          | 0.30            | 0.67             | 1.86           | 9.88              | 1.34            | 6.78            | 7.03             | 10.42          | 12.57           |
| 23               | 163.38                | 0.35             | 2.17          | 0.44            | 0.71             | 1.50           | 8.65              | 0.92            | 7.29            | 7.45             | 9.01           | 11.69           |
| 26               | 153.96                | 0.43             | 2.22          | 0.69            | 1.04             | 1.22           | 7.41              | 0.69            | 8.06            | 8.26             | 7.76           | 11.33           |
| 29               | 144.80                | 0.52             | 2.48          | 1.02            | 1.92             | 1.08           | 6.24              | 0.58            | 8.54            | 8.90             | 6.73           | 11.16           |
| 32               | 133.17                | 0.64             | 2.39          | 1.36            | 3.37             | 1.15           | 5.29              | 0.56            | 9.16            | 9.92             | 5.86           | 11.52           |
| 35               | 121.79                | 0.81             | 2.12          | 1.67            | 5.00             | 1.27           | 4.58              | 0.61            | 10.48           | 11.79            | 5.16           | 12.87           |
| 38               | 111.82                | 0.98             | 1.91          | 1.90            | 6.53             | 1.37           | 4.08              | 0.69            | 12.14           | 13.99            | 4.66           | 14.74           |
| 41               | 104.41                | 1.09             | 1.79          | 2.03            | 7.75             | 1.44           | 3.77              | 0.76            | 13.61           | 15.87            | 4.36           | 16.45           |

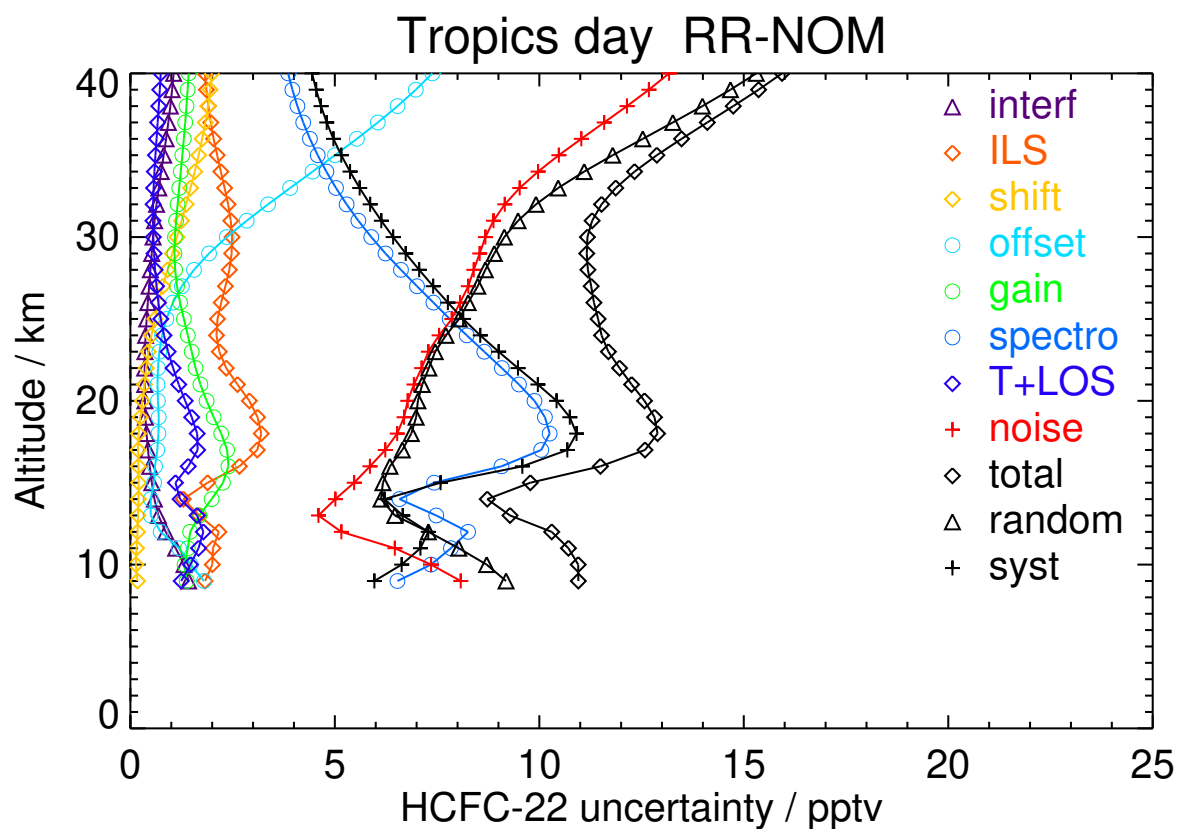

**Figure S51.** V8R\_F-22\_261 Tropics day

**Table S53.** HCFC-22 error budget for Tropics night. All uncertainties are  $1\sigma$ .

| altitude<br>(km) | mean target<br>(pptv) | interf<br>(pptv) | ILS<br>(pptv) | shift<br>(pptv) | offset<br>(pptv) | gain<br>(pptv) | spectro<br>(pptv) | T+LOS<br>(pptv) | noise<br>(pptv) | random<br>(pptv) | syst<br>(pptv) | total<br>(pptv) |
|------------------|-----------------------|------------------|---------------|-----------------|------------------|----------------|-------------------|-----------------|-----------------|------------------|----------------|-----------------|
| 11               | 190.03                | 1.15             | 3.08          | 0.18            | 1.14             | 1.20           | 9.52              | 2.18            | 6.54            | 8.91             | 8.52           | 12.33           |
| 14               | 202.41                | 0.63             | 1.21          | 0.17            | 0.52             | 1.75           | 6.54              | 1.56            | 5.16            | 5.98             | 6.43           | 8.78            |
| 17               | 196.89                | 0.44             | 3.22          | 0.19            | 0.65             | 2.55           | 10.52             | 1.79            | 6.38            | 6.89             | 11.16          | 13.12           |
| 20               | 174.32                | 0.36             | 3.02          | 0.27            | 0.67             | 1.93           | 10.07             | 1.46            | 6.98            | 7.24             | 10.65          | 12.87           |
| 23               | 157.47                | 0.36             | 2.21          | 0.44            | 0.66             | 1.47           | 8.37              | 0.97            | 7.46            | 7.63             | 8.73           | 11.59           |
| 26               | 148.16                | 0.43             | 2.12          | 0.69            | 0.99             | 1.22           | 6.99              | 0.69            | 8.17            | 8.36             | 7.34           | 11.12           |
| 29               | 140.61                | 0.53             | 2.24          | 1.00            | 1.90             | 1.08           | 5.90              | 0.56            | 8.67            | 9.00             | 6.35           | 11.01           |
| 32               | 131.42                | 0.66             | 2.13          | 1.31            | 3.35             | 1.14           | 5.04              | 0.54            | 9.39            | 10.11            | 5.54           | 11.53           |
| 35               | 120.40                | 0.83             | 1.88          | 1.59            | 4.97             | 1.27           | 4.39              | 0.60            | 10.78           | 12.04            | 4.90           | 13.00           |
| 38               | 110.62                | 0.98             | 1.68          | 1.79            | 6.47             | 1.38           | 3.93              | 0.68            | 12.44           | 14.20            | 4.45           | 14.88           |
| 41               | 103.39                | 1.09             | 1.58          | 1.92            | 7.65             | 1.46           | 3.64              | 0.75            | 13.87           | 16.03            | 4.18           | 16.56           |

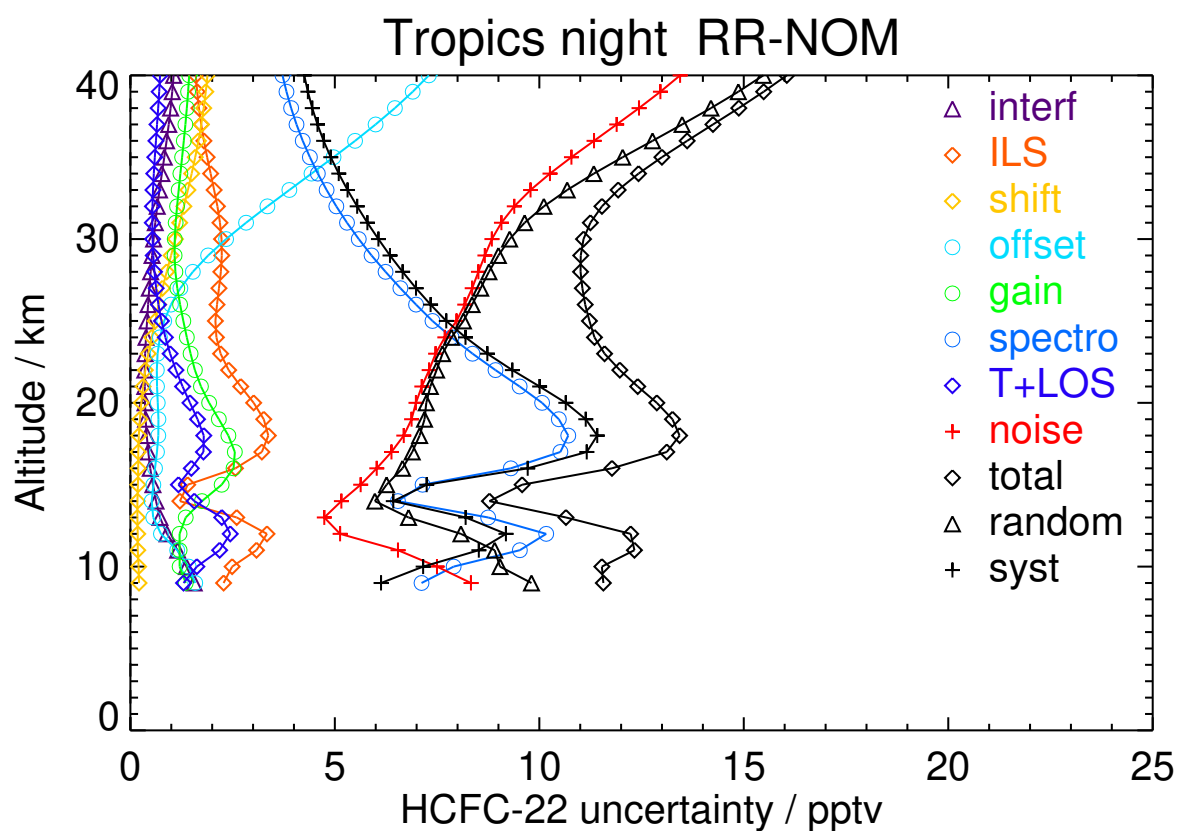

**Figure S52.** V8R\_F-22\_261 Tropics night

**Table S54.** HCFC-22 error budget for Southern midlatitude winter day. All uncertainties are  $1\sigma$ .

| altitude<br>(km) | mean target<br>(pptv) | interf<br>(pptv) | ILS<br>(pptv) | shift<br>(pptv) | offset<br>(pptv) | gain<br>(pptv) | spectro<br>(pptv) | T+LOS<br>(pptv) | noise<br>(pptv) | random<br>(pptv) | syst<br>(pptv) | total<br>(pptv) |
|------------------|-----------------------|------------------|---------------|-----------------|------------------|----------------|-------------------|-----------------|-----------------|------------------|----------------|-----------------|
| 8                | 187.13                | 0.80             | 1.49          | 0.16            | 0.53             | 1.54           | 7.47              | 1.29            | 4.07            | 6.36             | 6.27           | 8.93            |
| 11               | 188.44                | 0.51             | 2.05          | 0.26            | 0.48             | 2.65           | 7.90              | 1.08            | 4.34            | 6.45             | 7.25           | 9.70            |
| 14               | 174.72                | 0.38             | 3.43          | 0.34            | 0.46             | 2.52           | 9.84              | 1.22            | 4.90            | 5.29             | 10.63          | 11.87           |
| 17               | 154.57                | 0.36             | 2.86          | 0.35            | 0.50             | 2.12           | 9.15              | 0.99            | 5.77            | 5.99             | 9.77           | 11.46           |
| 20               | 134.34                | 0.35             | 1.67          | 0.40            | 0.64             | 1.78           | 7.62              | 0.80            | 6.73            | 6.94             | 7.91           | 10.52           |
| 23               | 123.28                | 0.37             | 1.04          | 0.37            | 1.10             | 1.48           | 6.09              | 0.51            | 7.84            | 8.02             | 6.26           | 10.17           |
| 26               | 116.65                | 0.45             | 1.06          | 0.39            | 2.33             | 1.31           | 5.24              | 0.39            | 9.08            | 9.44             | 5.44           | 10.90           |
| 29               | 105.87                | 0.55             | 1.30          | 0.51            | 4.27             | 1.27           | 4.52              | 0.37            | 10.45           | 11.34            | 4.81           | 12.32           |
| 32               | 96.73                 | 0.71             | 1.50          | 0.70            | 6.34             | 1.28           | 3.91              | 0.44            | 12.43           | 14.02            | 4.30           | 14.67           |
| 35               | 89.48                 | 0.86             | 1.63          | 0.89            | 8.06             | 1.31           | 3.47              | 0.54            | 14.30           | 16.50            | 3.96           | 16.97           |
| 38               | 85.90                 | 0.99             | 1.74          | 1.06            | 9.32             | 1.35           | 3.21              | 0.64            | 15.76           | 18.40            | 3.79           | 18.79           |
| 41               | 83.58                 | 1.10             | 1.72          | 1.37            | 9.62             | 1.40           | 2.87              | 0.74            | 16.15           | 18.92            | 3.53           | 19.25           |

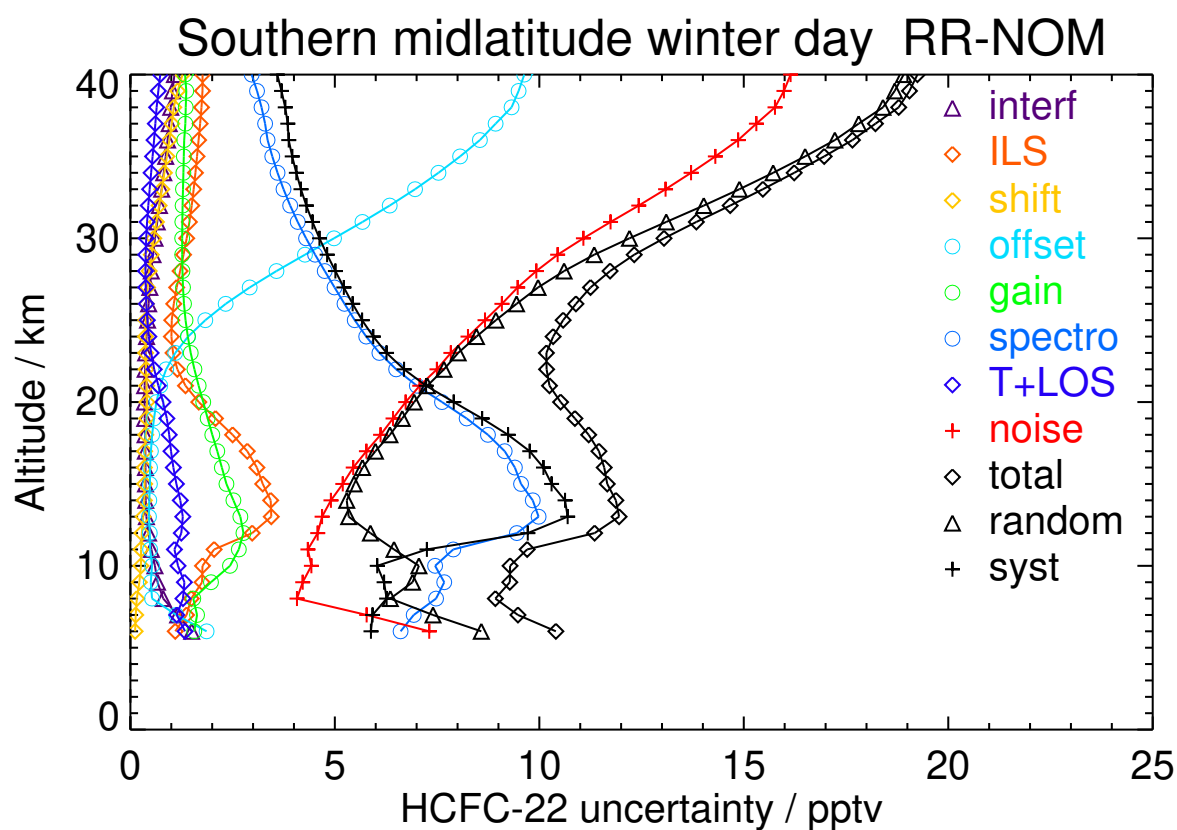

**Figure S53.** V8R\_F-22\_261 Southern midlatitude winter day

**Table S55.** HCFC-22 error budget for Southern midlatitude winter night. All uncertainties are  $1\sigma$ .

| altitude<br>(km) | mean target<br>(pptv) | interf<br>(pptv) | ILS<br>(pptv) | shift<br>(pptv) | offset<br>(pptv) | gain<br>(pptv) | spectro<br>(pptv) | T+LOS<br>(pptv) | noise<br>(pptv) | random<br>(pptv) | syst<br>(pptv) | total<br>(pptv) |
|------------------|-----------------------|------------------|---------------|-----------------|------------------|----------------|-------------------|-----------------|-----------------|------------------|----------------|-----------------|
| 8                | 189.92                | 0.88             | 1.44          | 0.15            | 0.55             | 1.19           | 7.15              | 1.31            | 4.29            | 5.74             | 6.55           | 8.71            |
| 11               | 189.54                | 0.54             | 1.71          | 0.22            | 0.55             | 2.05           | 7.53              | 1.08            | 4.32            | 6.45             | 6.54           | 9.18            |
| 14               | 176.86                | 0.38             | 3.47          | 0.34            | 0.46             | 2.32           | 9.61              | 1.23            | 4.87            | 5.34             | 10.35          | 11.64           |
| 17               | 158.72                | 0.37             | 3.17          | 0.36            | 0.49             | 1.97           | 9.26              | 0.99            | 5.71            | 5.96             | 9.91           | 11.56           |
| 20               | 137.80                | 0.34             | 1.87          | 0.41            | 0.63             | 1.55           | 7.63              | 0.82            | 6.69            | 6.86             | 7.94           | 10.50           |
| 23               | 125.04                | 0.37             | 1.07          | 0.38            | 1.05             | 1.25           | 6.14              | 0.54            | 7.83            | 7.97             | 6.32           | 10.17           |
| 26               | 114.96                | 0.45             | 1.03          | 0.40            | 2.25             | 1.15           | 5.25              | 0.39            | 8.94            | 9.26             | 5.44           | 10.74           |
| 29               | 102.89                | 0.55             | 1.27          | 0.52            | 4.18             | 1.13           | 4.52              | 0.35            | 10.28           | 11.15            | 4.78           | 12.13           |
| 32               | 91.48                 | 0.70             | 1.53          | 0.72            | 6.27             | 1.14           | 3.92              | 0.41            | 12.20           | 13.78            | 4.29           | 14.44           |
| 35               | 83.95                 | 0.87             | 1.71          | 0.92            | 8.01             | 1.15           | 3.50              | 0.50            | 14.14           | 16.33            | 3.96           | 16.81           |
| 38               | 78.58                 | 0.99             | 1.84          | 1.08            | 9.35             | 1.16           | 3.20              | 0.59            | 15.67           | 18.34            | 3.76           | 18.72           |
| 41               | 83.89                 | 1.09             | 2.18          | 1.36            | 9.69             | 1.20           | 3.38              | 0.70            | 16.12           | 18.91            | 4.13           | 19.36           |

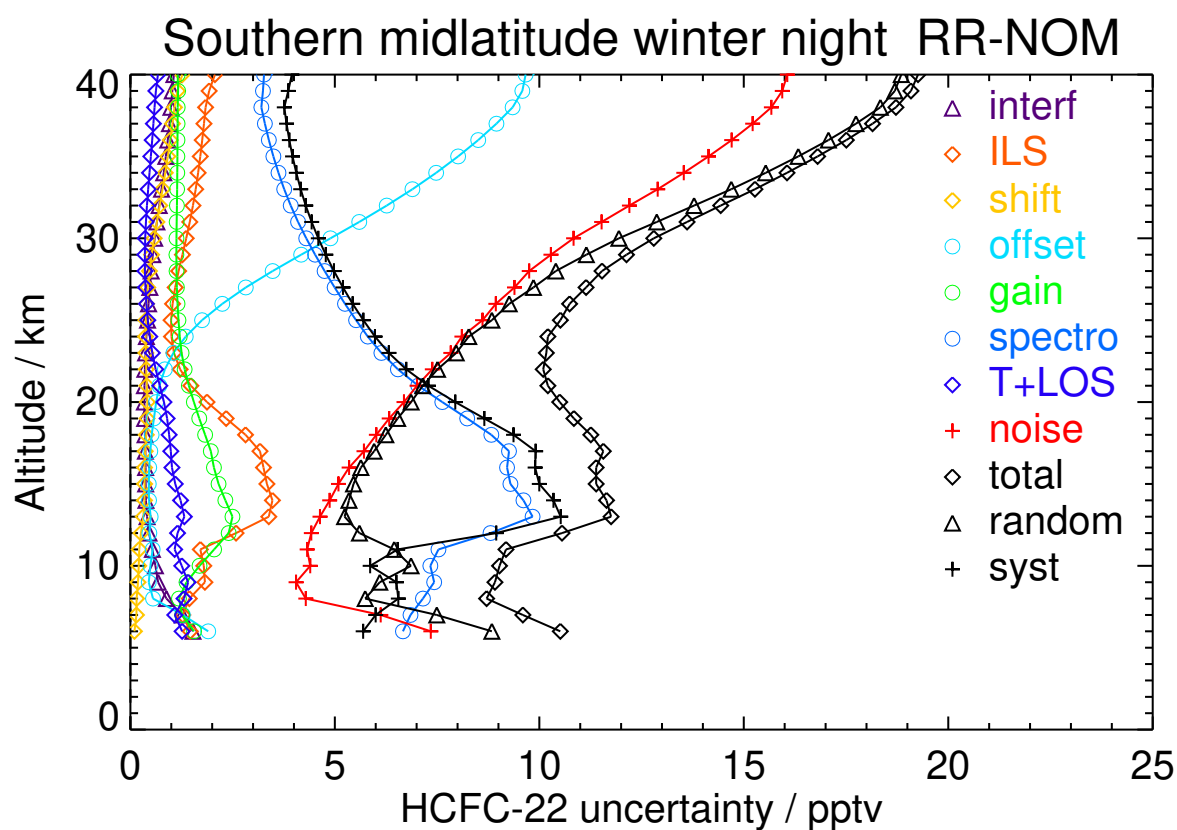

**Figure S54.** V8R\_F-22\_261 Southern midlatitude winter night

**Table S56.** HCFC-22 error budget for Southern midlatitude spring day. All uncertainties are  $1\sigma$ .

| altitude<br>(km) | mean target<br>(pptv) | interf<br>(pptv) | ILS<br>(pptv) | shift<br>(pptv) | offset<br>(pptv) | gain<br>(pptv) | spectro<br>(pptv) | T+LOS<br>(pptv) | noise<br>(pptv) | random<br>(pptv) | syst<br>(pptv) | total<br>(pptv) |
|------------------|-----------------------|------------------|---------------|-----------------|------------------|----------------|-------------------|-----------------|-----------------|------------------|----------------|-----------------|
| 8                | 192.55                | 0.88             | 2.23          | 0.15            | 0.53             | 1.64           | 8.08              | 1.46            | 4.30            | 7.14             | 6.60           | 9.73            |
| 11               | 188.00                | 0.55             | 2.62          | 0.35            | 0.51             | 1.96           | 8.27              | 1.24            | 4.38            | 7.55             | 6.59           | 10.02           |
| 14               | 173.81                | 0.38             | 4.23          | 0.31            | 0.42             | 2.31           | 9.56              | 1.27            | 4.89            | 5.54             | 10.48          | 11.85           |
| 17               | 152.05                | 0.36             | 3.74          | 0.39            | 0.43             | 1.93           | 8.82              | 0.98            | 5.49            | 5.86             | 9.63           | 11.27           |
| 20               | 130.33                | 0.34             | 1.71          | 0.60            | 0.50             | 1.51           | 6.75              | 0.68            | 6.14            | 6.55             | 6.84           | 9.47            |
| 23               | 129.55                | 0.37             | 0.87          | 0.72            | 0.58             | 1.24           | 5.36              | 0.39            | 6.95            | 7.20             | 5.36           | 8.97            |
| 26               | 134.06                | 0.45             | 1.16          | 0.86            | 0.97             | 1.15           | 5.19              | 0.35            | 8.01            | 8.19             | 5.37           | 9.79            |
| 29               | 128.86                | 0.53             | 1.65          | 1.02            | 1.98             | 1.11           | 4.99              | 0.37            | 8.50            | 8.83             | 5.33           | 10.32           |
| 32               | 117.88                | 0.64             | 1.83          | 1.19            | 3.57             | 1.17           | 4.56              | 0.40            | 9.44            | 10.21            | 5.02           | 11.38           |
| 35               | 107.56                | 0.78             | 1.80          | 1.38            | 5.27             | 1.25           | 4.12              | 0.47            | 11.03           | 12.35            | 4.63           | 13.19           |
| 38               | 100.26                | 0.92             | 1.75          | 1.54            | 6.77             | 1.30           | 3.76              | 0.56            | 12.89           | 14.69            | 4.30           | 15.31           |
| 41               | 95.15                 | 1.02             | 1.73          | 1.65            | 7.91             | 1.34           | 3.50              | 0.64            | 14.36           | 16.53            | 4.08           | 17.02           |

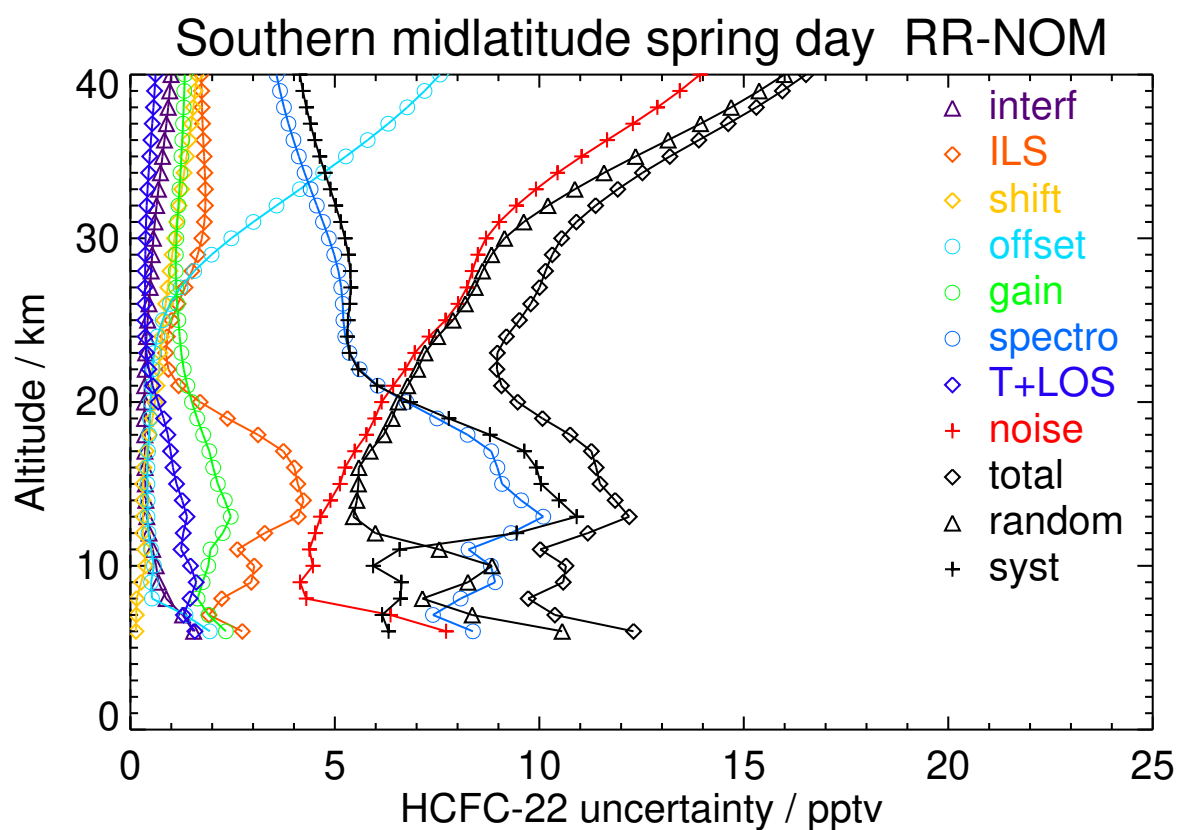

**Figure S55.** V8R\_F-22\_261 Southern midlatitude spring day

**Table S57.** HCFC-22 error budget for Southern midlatitude spring night. All uncertainties are  $1\sigma$ .

| altitude<br>(km) | mean target<br>(pptv) | interf<br>(pptv) | ILS<br>(pptv) | shift<br>(pptv) | offset<br>(pptv) | gain<br>(pptv) | spectro<br>(pptv) | T+LOS<br>(pptv) | noise<br>(pptv) | random<br>(pptv) | syst<br>(pptv) | total<br>(pptv) |
|------------------|-----------------------|------------------|---------------|-----------------|------------------|----------------|-------------------|-----------------|-----------------|------------------|----------------|-----------------|
| 8                | 194.84                | 0.89             | 2.48          | 0.16            | 0.56             | 1.45           | 8.25              | 1.48            | 4.26            | 7.07             | 6.91           | 9.89            |
| 11               | 193.58                | 0.56             | 2.26          | 0.21            | 0.53             | 2.18           | 8.34              | 1.19            | 4.31            | 7.78             | 6.28           | 10.00           |
| 14               | 181.52                | 0.40             | 4.29          | 0.30            | 0.45             | 2.59           | 10.08             | 1.33            | 4.94            | 5.43             | 11.13          | 12.38           |
| 17               | 151.63                | 0.37             | 3.91          | 0.35            | 0.50             | 2.12           | 9.63              | 1.15            | 5.70            | 6.02             | 10.51          | 12.11           |
| 20               | 122.27                | 0.35             | 2.23          | 0.51            | 0.59             | 1.45           | 7.04              | 0.79            | 6.42            | 6.72             | 7.36           | 9.97            |
| 23               | 116.35                | 0.37             | 1.20          | 0.63            | 0.68             | 1.16           | 5.03              | 0.43            | 7.22            | 7.43             | 5.13           | 9.02            |
| 26               | 118.32                | 0.45             | 1.21          | 0.83            | 1.04             | 1.14           | 4.61              | 0.36            | 8.09            | 8.35             | 4.66           | 9.57            |
| 29               | 116.66                | 0.54             | 1.57          | 1.09            | 2.03             | 1.08           | 4.35              | 0.37            | 8.54            | 9.02             | 4.46           | 10.06           |
| 32               | 108.27                | 0.67             | 1.73          | 1.34            | 3.59             | 1.10           | 3.97              | 0.41            | 9.40            | 10.30            | 4.20           | 11.12           |
| 35               | 98.45                 | 0.82             | 1.72          | 1.56            | 5.27             | 1.16           | 3.59              | 0.49            | 10.96           | 12.38            | 3.90           | 12.98           |
| 38               | 90.60                 | 0.97             | 1.70          | 1.75            | 6.78             | 1.23           | 3.28              | 0.58            | 12.79           | 14.68            | 3.67           | 15.13           |
| 41               | 84.80                 | 1.07             | 1.71          | 1.86            | 7.93             | 1.27           | 3.07              | 0.66            | 14.27           | 16.52            | 3.53           | 16.89           |

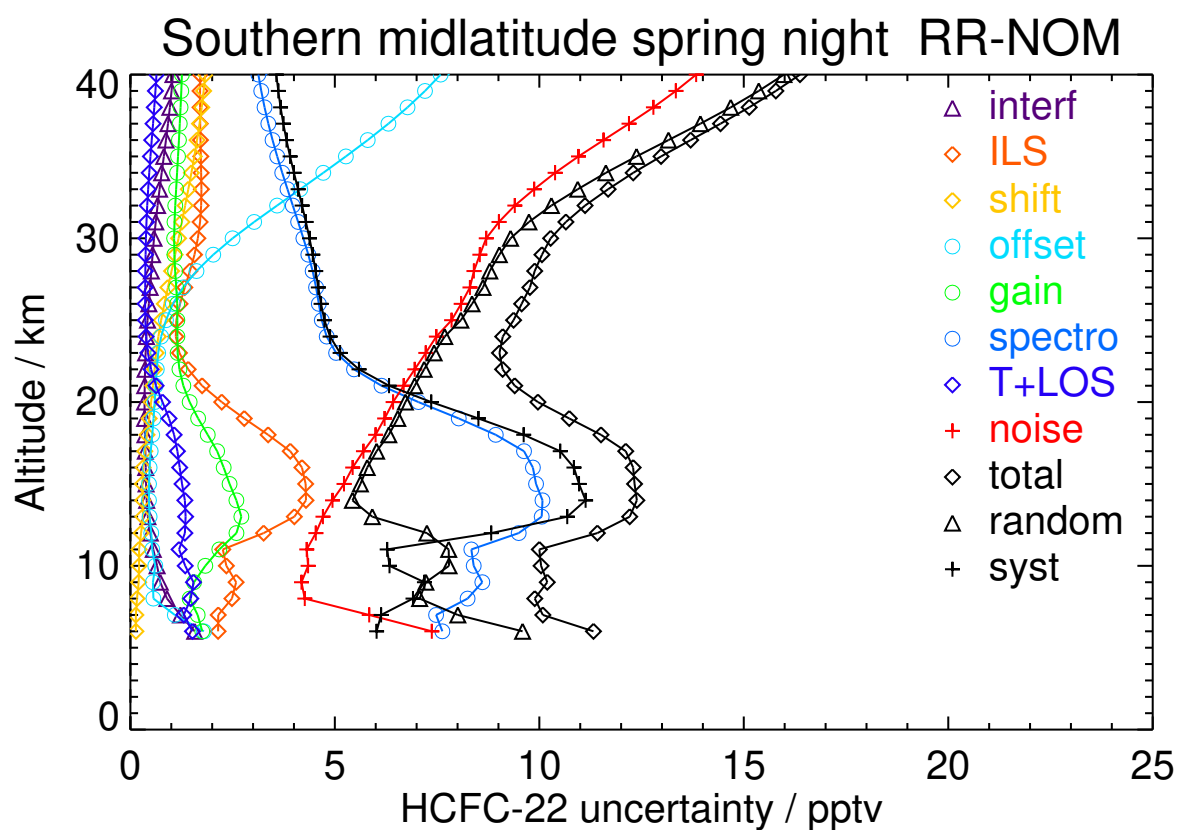

**Figure S56.** V8R\_F-22\_261 Southern midlatitude spring night

**Table S58.** HCFC-22 error budget for Southern midlatitude summer day. All uncertainties are  $1\sigma$ .

| altitude<br>(km) | mean target<br>(pptv) | interf<br>(pptv) | ILS<br>(pptv) | shift<br>(pptv) | offset<br>(pptv) | gain<br>(pptv) | spectro<br>(pptv) | T+LOS<br>(pptv) | noise<br>(pptv) | random<br>(pptv) | syst<br>(pptv) | total<br>(pptv) |
|------------------|-----------------------|------------------|---------------|-----------------|------------------|----------------|-------------------|-----------------|-----------------|------------------|----------------|-----------------|
| 8                | 183.70                | 1.07             | 2.14          | 0.26            | 0.76             | 1.35           | 8.75              | 1.36            | 4.95            | 7.64             | 7.26           | 10.54           |
| 11               | 184.42                | 0.66             | 3.84          | 0.26            | 0.53             | 1.17           | 10.25             | 1.61            | 4.15            | 8.70             | 8.13           | 11.91           |
| 14               | 175.12                | 0.40             | 4.18          | 0.32            | 0.39             | 2.44           | 9.23              | 1.13            | 4.64            | 5.54             | 10.06          | 11.48           |
| 17               | 163.81                | 0.36             | 3.83          | 0.32            | 0.42             | 1.92           | 9.31              | 0.95            | 5.39            | 5.70             | 10.14          | 11.63           |
| 20               | 137.05                | 0.33             | 2.50          | 0.44            | 0.55             | 1.49           | 8.65              | 0.88            | 6.14            | 6.62             | 8.86           | 11.06           |
| 23               | 121.32                | 0.36             | 1.49          | 0.54            | 0.63             | 1.14           | 6.29              | 0.56            | 6.94            | 7.15             | 6.42           | 9.61            |
| 26               | 112.25                | 0.42             | 1.34          | 0.68            | 0.87             | 0.86           | 4.95              | 0.44            | 7.79            | 7.92             | 5.15           | 9.45            |
| 29               | 104.48                | 0.50             | 1.61          | 0.95            | 1.59             | 0.69           | 4.10              | 0.41            | 8.30            | 8.54             | 4.42           | 9.62            |
| 32               | 100.98                | 0.62             | 1.71          | 1.32            | 2.90             | 0.70           | 3.56              | 0.45            | 8.72            | 9.33             | 3.98           | 10.14           |
| 35               | 97.61                 | 0.82             | 1.63          | 1.72            | 4.50             | 0.76           | 3.21              | 0.58            | 9.81            | 10.99            | 3.63           | 11.57           |
| 38               | 93.74                 | 1.01             | 1.54          | 2.02            | 6.07             | 0.84           | 2.98              | 0.71            | 11.49           | 13.23            | 3.39           | 13.66           |
| 41               | 90.12                 | 1.16             | 1.48          | 2.21            | 7.35             | 0.90           | 2.83              | 0.82            | 13.07           | 15.24            | 3.24           | 15.58           |

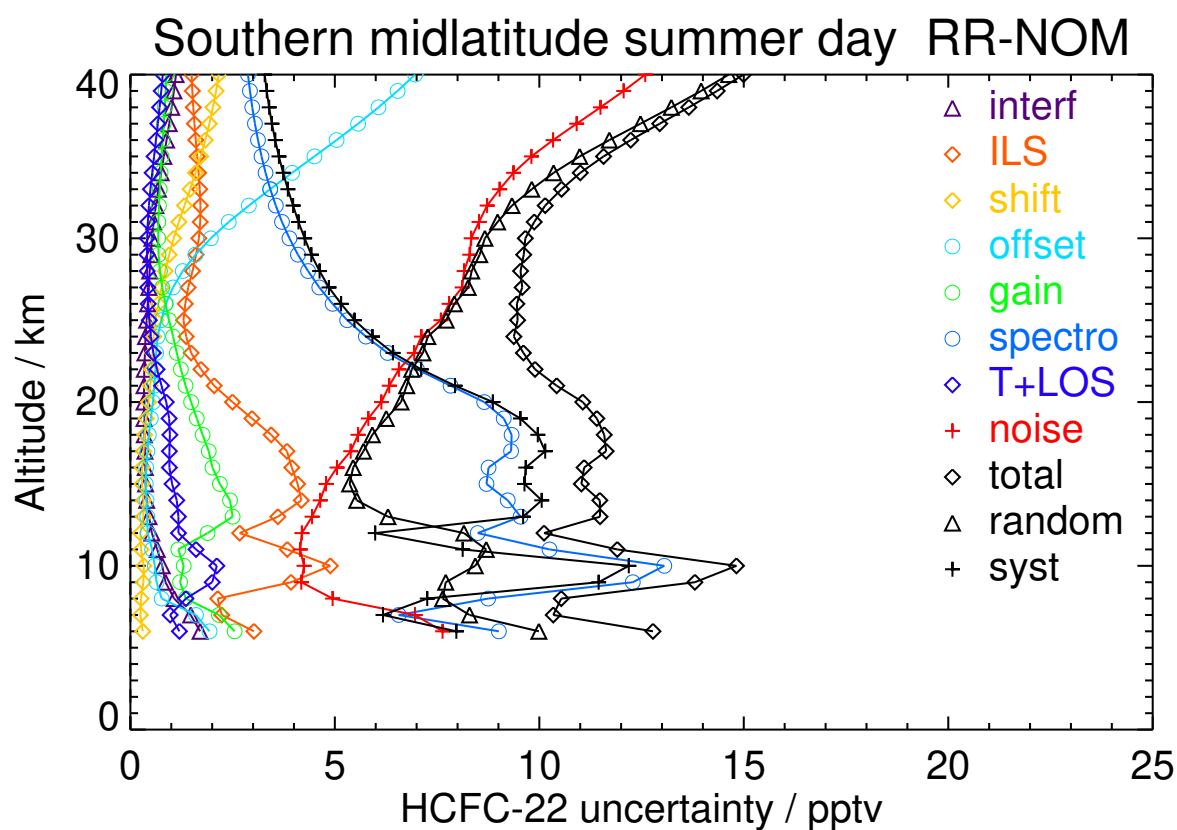

**Figure S57.** V8R\_F-22\_261 Southern midlatitude summer day

**Table S59.** HCFC-22 error budget for Southern midlatitude summer night. All uncertainties are  $1\sigma$ .

| altitude<br>(km) | mean target<br>(pptv) | interf<br>(pptv) | ILS<br>(pptv) | shift<br>(pptv) | offset<br>(pptv) | gain<br>(pptv) | spectro<br>(pptv) | T+LOS<br>(pptv) | noise<br>(pptv) | random<br>(pptv) | syst<br>(pptv) | total<br>(pptv) |
|------------------|-----------------------|------------------|---------------|-----------------|------------------|----------------|-------------------|-----------------|-----------------|------------------|----------------|-----------------|
| 8                | 183.89                | 1.01             | 2.83          | 0.20            | 0.57             | 0.76           | 9.59              | 1.59            | 4.64            | 6.51             | 9.15           | 11.23           |
| 11               | 185.70                | 0.63             | 2.93          | 0.20            | 0.52             | 1.37           | 8.18              | 1.32            | 4.11            | 7.25             | 6.65           | 9.83            |
| 14               | 174.42                | 0.39             | 5.18          | 0.33            | 0.43             | 2.71           | 10.54             | 1.30            | 4.62            | 5.40             | 11.81          | 12.99           |
| 17               | 157.10                | 0.36             | 3.84          | 0.34            | 0.44             | 2.08           | 9.07              | 0.98            | 5.34            | 5.72             | 9.93           | 11.46           |
| 20               | 135.73                | 0.33             | 2.21          | 0.46            | 0.54             | 1.68           | 7.87              | 0.81            | 6.12            | 6.55             | 8.10           | 10.41           |
| 23               | 121.06                | 0.35             | 1.31          | 0.55            | 0.63             | 1.30           | 6.03              | 0.54            | 6.92            | 7.16             | 6.13           | 9.42            |
| 26               | 113.66                | 0.43             | 1.37          | 0.71            | 0.86             | 0.93           | 4.85              | 0.44            | 7.75            | 7.91             | 5.04           | 9.38            |
| 29               | 106.03                | 0.50             | 1.68          | 0.97            | 1.55             | 0.73           | 4.01              | 0.41            | 8.29            | 8.53             | 4.38           | 9.59            |
| 32               | 100.68                | 0.62             | 1.86          | 1.35            | 2.81             | 0.75           | 3.42              | 0.44            | 8.65            | 9.23             | 3.94           | 10.04           |
| 35               | 94.93                 | 0.82             | 1.89          | 1.76            | 4.38             | 0.83           | 3.00              | 0.55            | 9.65            | 10.80            | 3.61           | 11.38           |
| 38               | 87.82                 | 1.02             | 1.90          | 2.08            | 5.95             | 0.92           | 2.74              | 0.67            | 11.27           | 12.98            | 3.41           | 13.42           |
| 41               | 81.71                 | 1.17             | 1.92          | 2.29            | 7.25             | 1.00           | 2.58              | 0.77            | 12.84           | 15.00            | 3.31           | 15.36           |

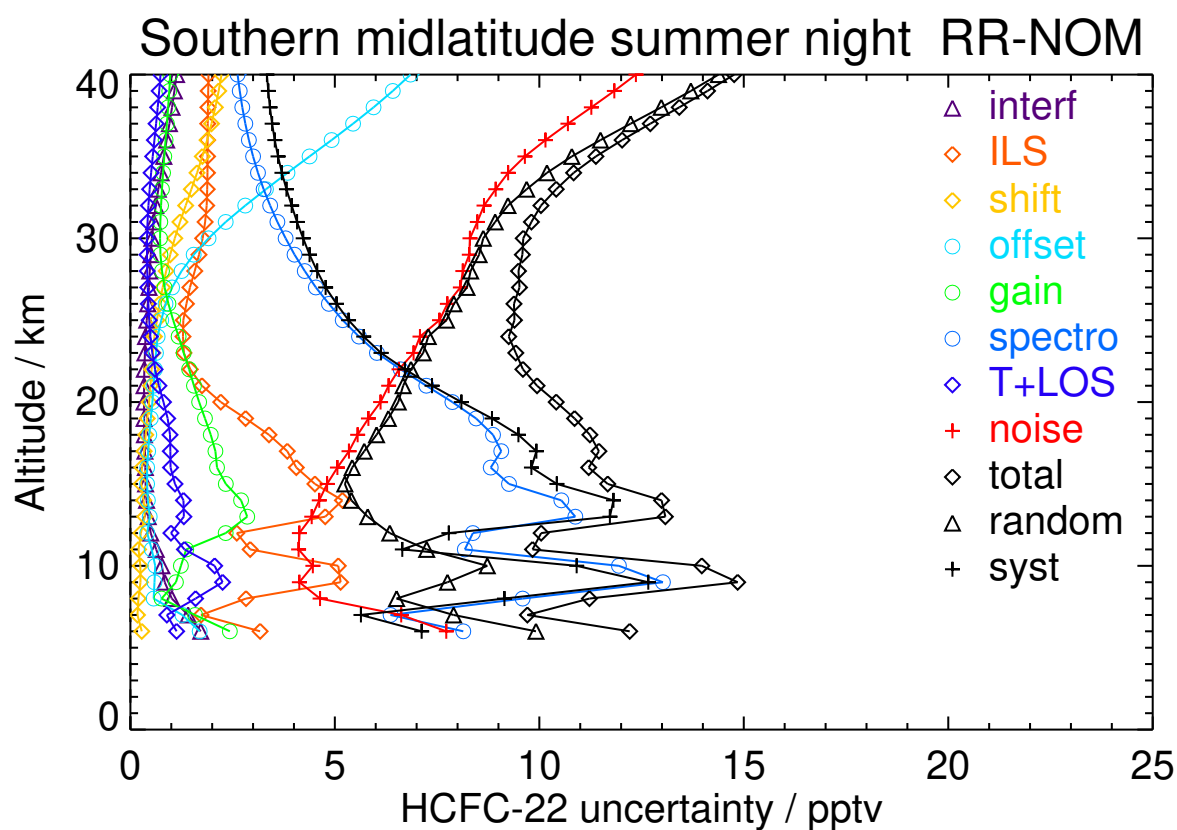

**Figure S58.** V8R\_F-22\_261 Southern midlatitude summer night

**Table S60.** HCFC-22 error budget for Southern midlatitude autumn day. All uncertainties are  $1\sigma$ .

| altitude<br>(km) | mean target<br>(pptv) | interf<br>(pptv) | ILS<br>(pptv) | shift<br>(pptv) | offset<br>(pptv) | gain<br>(pptv) | spectro<br>(pptv) | T+LOS<br>(pptv) | noise<br>(pptv) | random<br>(pptv) | syst<br>(pptv) | total<br>(pptv) |
|------------------|-----------------------|------------------|---------------|-----------------|------------------|----------------|-------------------|-----------------|-----------------|------------------|----------------|-----------------|
| 8                | 181.35                | 0.91             | 1.65          | 0.16            | 0.51             | 1.25           | 7.41              | 1.24            | 4.22            | 5.89             | 6.71           | 8.93            |
| 11               | 189.12                | 0.59             | 2.09          | 0.21            | 0.42             | 1.77           | 7.87              | 1.18            | 4.21            | 7.38             | 5.88           | 9.44            |
| 14               | 181.03                | 0.38             | 3.74          | 0.32            | 0.43             | 2.60           | 9.53              | 1.14            | 4.79            | 5.16             | 10.47          | 11.67           |
| 17               | 160.05                | 0.35             | 3.39          | 0.32            | 0.45             | 2.36           | 9.47              | 1.03            | 5.57            | 5.80             | 10.28          | 11.80           |
| 20               | 136.44                | 0.34             | 1.79          | 0.43            | 0.54             | 1.85           | 8.06              | 0.82            | 6.41            | 6.63             | 8.36           | 10.67           |
| 23               | 120.27                | 0.36             | 1.20          | 0.46            | 0.72             | 1.59           | 6.27              | 0.53            | 7.38            | 7.56             | 6.45           | 9.94            |
| 26               | 108.93                | 0.43             | 1.25          | 0.55            | 1.33             | 1.24           | 4.99              | 0.40            | 8.39            | 8.57             | 5.23           | 10.04           |
| 29               | 98.65                 | 0.52             | 1.42          | 0.71            | 2.65             | 1.09           | 4.04              | 0.35            | 9.02            | 9.48             | 4.36           | 10.43           |
| 32               | 90.90                 | 0.65             | 1.44          | 0.90            | 4.44             | 1.08           | 3.42              | 0.36            | 10.35           | 11.35            | 3.79           | 11.97           |
| 35               | 85.47                 | 0.79             | 1.41          | 1.07            | 6.17             | 1.12           | 3.02              | 0.42            | 12.20           | 13.77            | 3.43           | 14.19           |
| 38               | 81.52                 | 0.91             | 1.39          | 1.21            | 7.61             | 1.18           | 2.76              | 0.49            | 14.00           | 16.03            | 3.21           | 16.35           |
| 41               | 79.38                 | 0.98             | 1.39          | 1.30            | 8.59             | 1.22           | 2.60              | 0.54            | 15.24           | 17.59            | 3.09           | 17.86           |

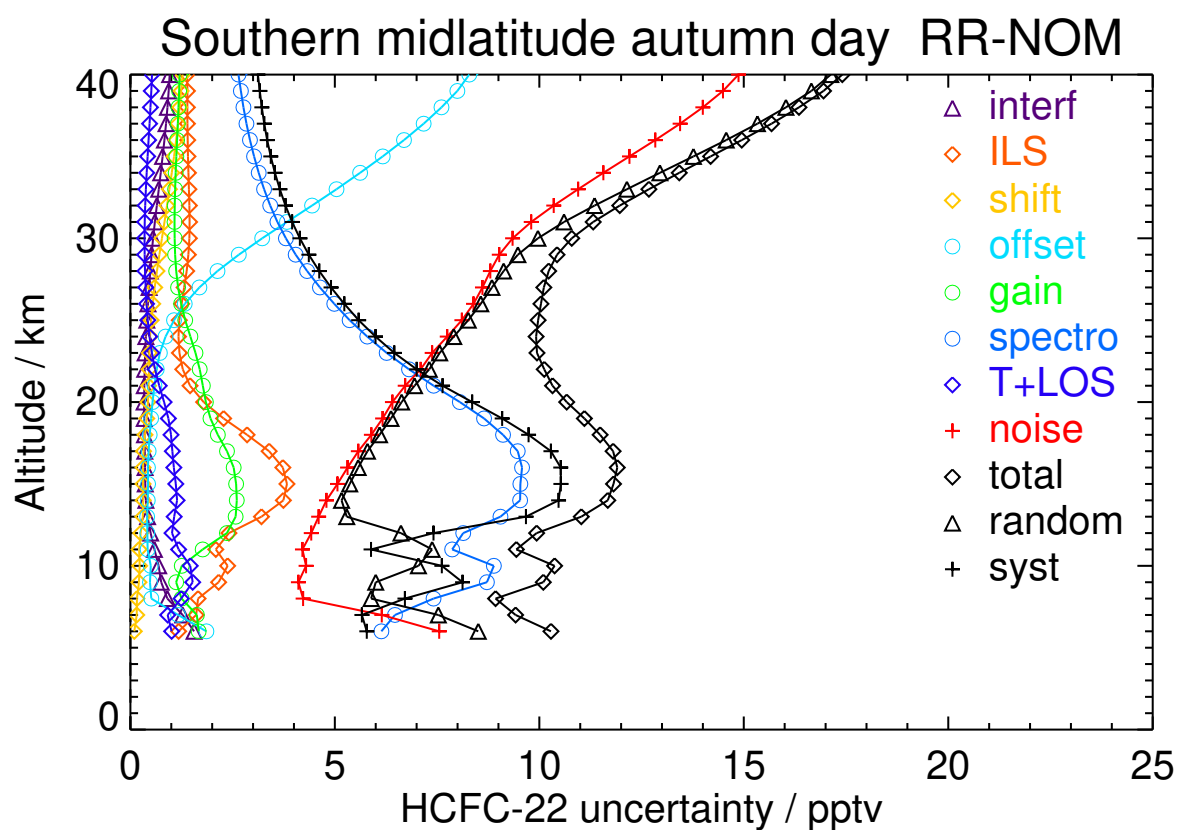

**Figure S59.** V8R\_F-22\_261 Southern midlatitude autumn day

**Table S61.** HCFC-22 error budget for Southern midlatitude autumn night. All uncertainties are  $1\sigma$ .

| altitude<br>(km) | mean target<br>(pptv) | interf<br>(pptv) | ILS<br>(pptv) | shift<br>(pptv) | offset<br>(pptv) | gain<br>(pptv) | spectro<br>(pptv) | T+LOS<br>(pptv) | noise<br>(pptv) | random<br>(pptv) | syst<br>(pptv) | total<br>(pptv) |
|------------------|-----------------------|------------------|---------------|-----------------|------------------|----------------|-------------------|-----------------|-----------------|------------------|----------------|-----------------|
| 8                | 184.99                | 0.94             | 2.22          | 0.19            | 0.55             | 1.41           | 8.35              | 1.35            | 4.38            | 6.94             | 7.12           | 9.94            |
| 11               | 189.72                | 0.62             | 2.43          | 0.24            | 0.51             | 1.58           | 8.83              | 1.29            | 4.19            | 8.11             | 6.38           | 10.32           |
| 14               | 182.87                | 0.39             | 4.21          | 0.35            | 0.42             | 2.73           | 10.25             | 1.22            | 4.79            | 5.16             | 11.33          | 12.45           |
| 17               | 162.04                | 0.36             | 3.78          | 0.34            | 0.45             | 2.33           | 9.73              | 1.06            | 5.55            | 5.81             | 10.62          | 12.11           |
| 20               | 135.55                | 0.34             | 1.97          | 0.44            | 0.55             | 1.92           | 7.87              | 0.84            | 6.40            | 6.59             | 8.26           | 10.57           |
| 23               | 120.44                | 0.36             | 1.20          | 0.48            | 0.72             | 1.48           | 6.08              | 0.51            | 7.39            | 7.55             | 6.27           | 9.82            |
| 26               | 112.52                | 0.43             | 1.27          | 0.56            | 1.31             | 1.17           | 5.03              | 0.38            | 8.29            | 8.47             | 5.25           | 9.97            |
| 29               | 101.99                | 0.52             | 1.47          | 0.75            | 2.58             | 0.97           | 4.24              | 0.35            | 8.97            | 9.41             | 4.54           | 10.44           |
| 32               | 92.03                 | 0.65             | 1.58          | 0.98            | 4.33             | 0.92           | 3.62              | 0.38            | 10.14           | 11.12            | 4.00           | 11.82           |
| 35               | 86.31                 | 0.81             | 1.61          | 1.20            | 6.06             | 0.96           | 3.20              | 0.46            | 11.92           | 13.48            | 3.64           | 13.96           |
| 38               | 82.83                 | 0.94             | 1.64          | 1.37            | 7.52             | 1.01           | 2.92              | 0.53            | 13.71           | 15.76            | 3.42           | 16.12           |
| 41               | 79.99                 | 1.02             | 1.67          | 1.47            | 8.58             | 1.05           | 2.74              | 0.59            | 15.04           | 17.43            | 3.29           | 17.74           |

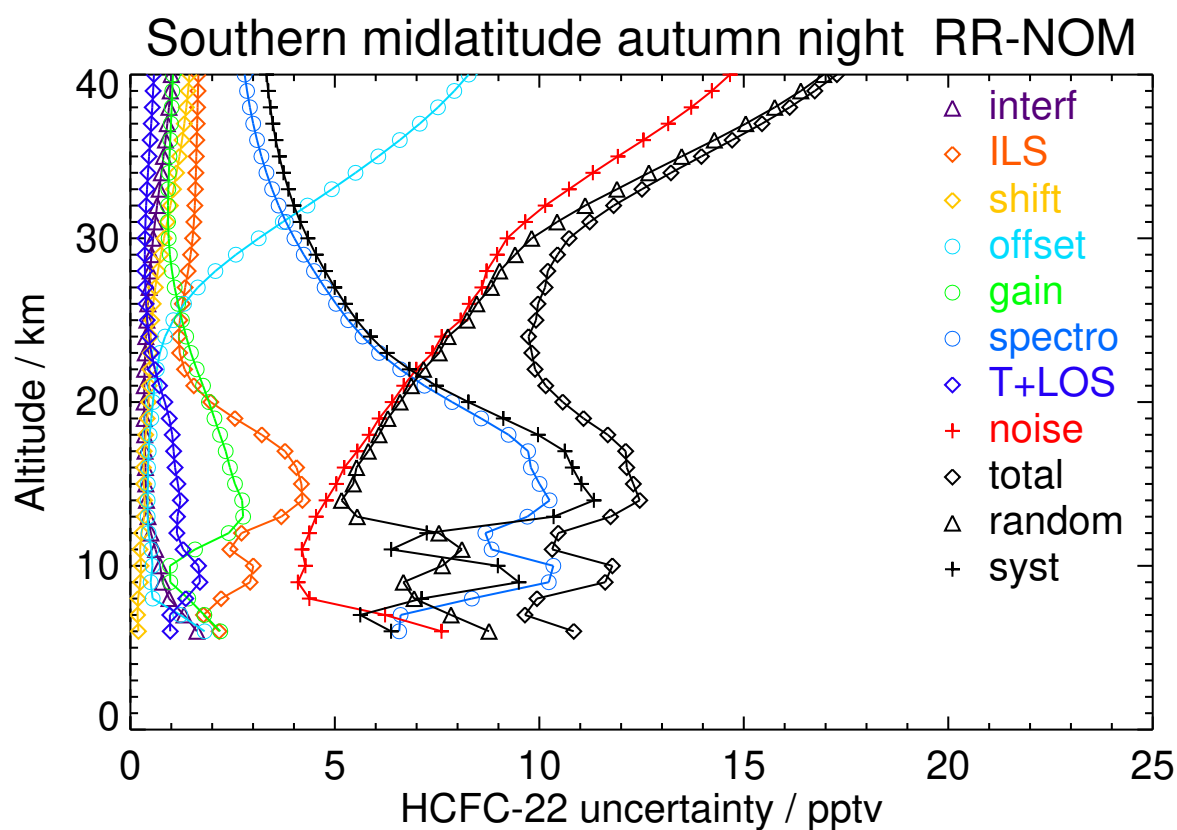

**Figure S60.** V8R\_F-22\_261 Southern midlatitude autumn night

**Table S62.** HCFC-22 error budget for Southern polar winter day. All uncertainties are  $1\sigma$ .

| altitude<br>(km) | mean target<br>(pptv) | interf<br>(pptv) | ILS<br>(pptv) | shift<br>(pptv) | offset<br>(pptv) | gain<br>(pptv) | spectro<br>(pptv) | T+LOS<br>(pptv) | noise<br>(pptv) | random<br>(pptv) | syst<br>(pptv) | total<br>(pptv) |
|------------------|-----------------------|------------------|---------------|-----------------|------------------|----------------|-------------------|-----------------|-----------------|------------------|----------------|-----------------|
| 5                | 182.83                | 1.65             | 0.63          | 0.13            | 2.12             | 1.62           | 6.96              | 1.57            | 7.61            | 9.11             | 6.00           | 10.91           |
| 8                | 190.55                | 0.68             | 1.59          | 0.21            | 0.59             | 1.83           | 7.35              | 1.34            | 4.23            | 6.59             | 6.09           | 8.97            |
| 11               | 186.69                | 0.45             | 3.04          | 0.31            | 0.58             | 2.82           | 10.76             | 1.67            | 4.66            | 5.37             | 11.36          | 12.57           |
| 14               | 158.30                | 0.40             | 3.29          | 0.30            | 0.57             | 2.24           | 10.40             | 1.53            | 5.51            | 5.90             | 11.07          | 12.54           |
| 17               | 129.31                | 0.39             | 2.69          | 0.26            | 0.67             | 1.76           | 8.82              | 1.15            | 6.63            | 6.89             | 9.31           | 11.58           |
| 20               | 106.15                | 0.37             | 1.83          | 0.25            | 1.03             | 1.32           | 6.95              | 0.90            | 7.83            | 8.05             | 7.21           | 10.81           |
| 23               | 84.21                 | 0.41             | 1.25          | 0.25            | 1.81             | 0.95           | 4.93              | 0.62            | 8.90            | 9.17             | 5.09           | 10.49           |
| 26               | 72.01                 | 0.46             | 1.07          | 0.36            | 3.18             | 0.77           | 3.43              | 0.42            | 9.95            | 10.50            | 3.59           | 11.10           |
| 29               | 64.37                 | 0.60             | 1.21          | 0.62            | 5.05             | 0.71           | 2.54              | 0.41            | 11.15           | 12.31            | 2.77           | 12.62           |
| 32               | 58.93                 | 0.82             | 1.45          | 0.93            | 7.00             | 0.70           | 2.11              | 0.56            | 13.05           | 14.90            | 2.47           | 15.11           |
| 35               | 55.15                 | 1.03             | 1.65          | 1.19            | 8.64             | 0.73           | 1.94              | 0.73            | 14.83           | 17.28            | 2.44           | 17.45           |
| 38               | 52.91                 | 1.18             | 1.79          | 1.41            | 9.82             | 0.73           | 1.87              | 0.87            | 16.19           | 19.07            | 2.50           | 19.24           |
| 41               | 46.34                 | 1.30             | 1.86          | 1.66            | 10.42            | 0.77           | 1.81              | 0.99            | 16.88           | 19.99            | 2.54           | 20.16           |

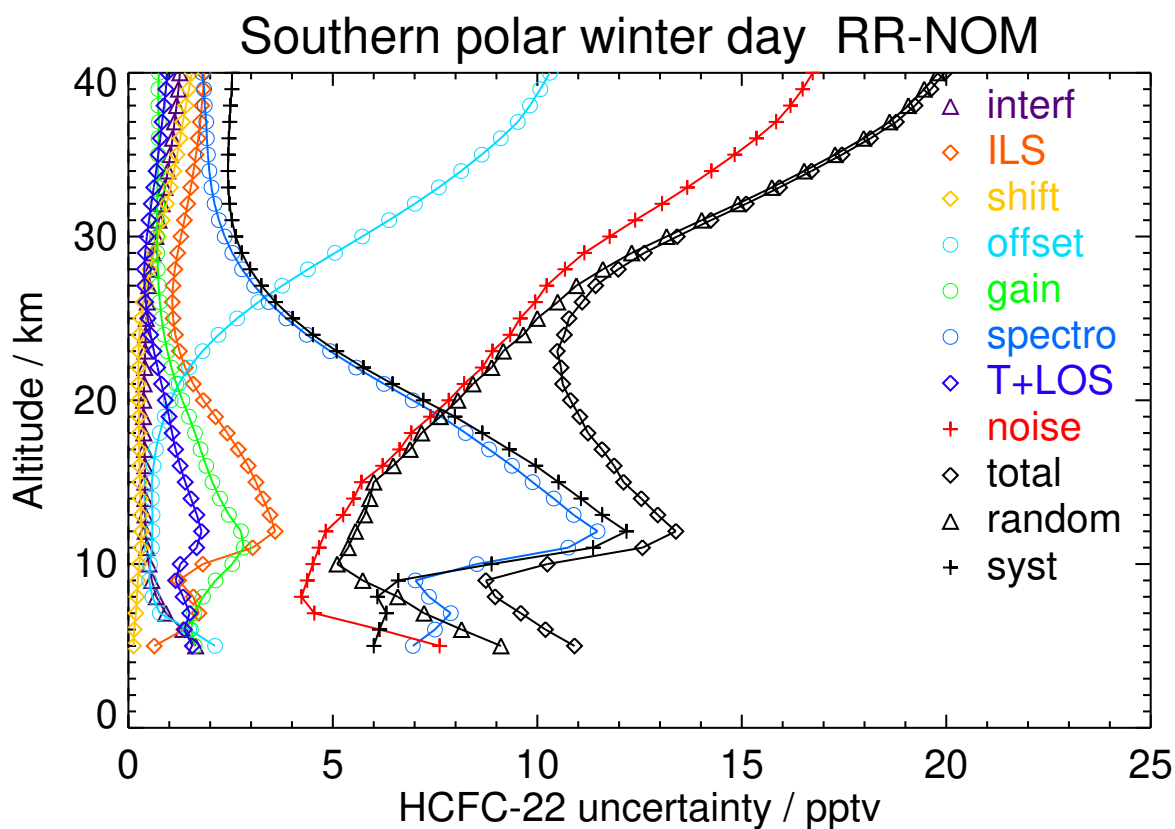

**Figure S61.** V8R\_F-22\_261 Southern polar winter day

**Table S63.** HCFC-22 error budget for Southern polar winter night. All uncertainties are  $1\sigma$ .

| altitude<br>(km) | mean target<br>(pptv) | interf<br>(pptv) | ILS<br>(pptv) | shift<br>(pptv) | offset<br>(pptv) | gain<br>(pptv) | spectro<br>(pptv) | T+LOS<br>(pptv) | noise<br>(pptv) | random<br>(pptv) | syst<br>(pptv) | total<br>(pptv) |
|------------------|-----------------------|------------------|---------------|-----------------|------------------|----------------|-------------------|-----------------|-----------------|------------------|----------------|-----------------|
| 5                | 187.16                | 1.75             | 1.50          | 0.23            | 2.10             | 0.97           | 8.20              | 1.95            | 7.82            | 9.78             | 6.87           | 11.96           |
| 8                | 192.59                | 0.70             | 1.70          | 0.20            | 0.51             | 1.49           | 7.72              | 1.64            | 4.14            | 6.44             | 6.62           | 9.24            |
| 11               | 189.91                | 0.47             | 2.65          | 0.28            | 0.53             | 2.73           | 9.70              | 1.60            | 4.68            | 5.35             | 10.25          | 11.56           |
| 14               | 165.08                | 0.40             | 3.06          | 0.29            | 0.55             | 2.16           | 9.49              | 1.46            | 5.44            | 5.79             | 10.14          | 11.68           |
| 17               | 136.06                | 0.39             | 2.87          | 0.28            | 0.64             | 1.68           | 8.62              | 1.16            | 6.49            | 6.71             | 9.19           | 11.38           |
| 20               | 113.52                | 0.37             | 2.20          | 0.26            | 0.97             | 1.25           | 7.17              | 0.92            | 7.68            | 7.88             | 7.53           | 10.90           |
| 23               | 92.06                 | 0.41             | 1.63          | 0.27            | 1.76             | 0.95           | 5.43              | 0.68            | 8.88            | 9.14             | 5.68           | 10.76           |
| 26               | 73.64                 | 0.47             | 1.42          | 0.40            | 3.11             | 0.78           | 3.82              | 0.49            | 9.95            | 10.48            | 4.09           | 11.25           |
| 29               | 59.91                 | 0.60             | 1.49          | 0.67            | 4.95             | 0.71           | 2.62              | 0.44            | 11.09           | 12.21            | 3.01           | 12.57           |
| 32               | 50.70                 | 0.82             | 1.67          | 0.99            | 6.87             | 0.70           | 1.93              | 0.54            | 12.89           | 14.69            | 2.54           | 14.91           |
| 35               | 45.52                 | 1.02             | 1.83          | 1.25            | 8.49             | 0.72           | 1.64              | 0.67            | 14.62           | 17.02            | 2.44           | 17.19           |
| 38               | 42.90                 | 1.17             | 1.96          | 1.46            | 9.70             | 0.74           | 1.55              | 0.79            | 16.02           | 18.85            | 2.49           | 19.02           |
| 41               | 47.03                 | 1.30             | 2.11          | 1.79            | 9.95             | 0.77           | 1.59              | 0.88            | 16.41           | 19.36            | 2.66           | 19.54           |

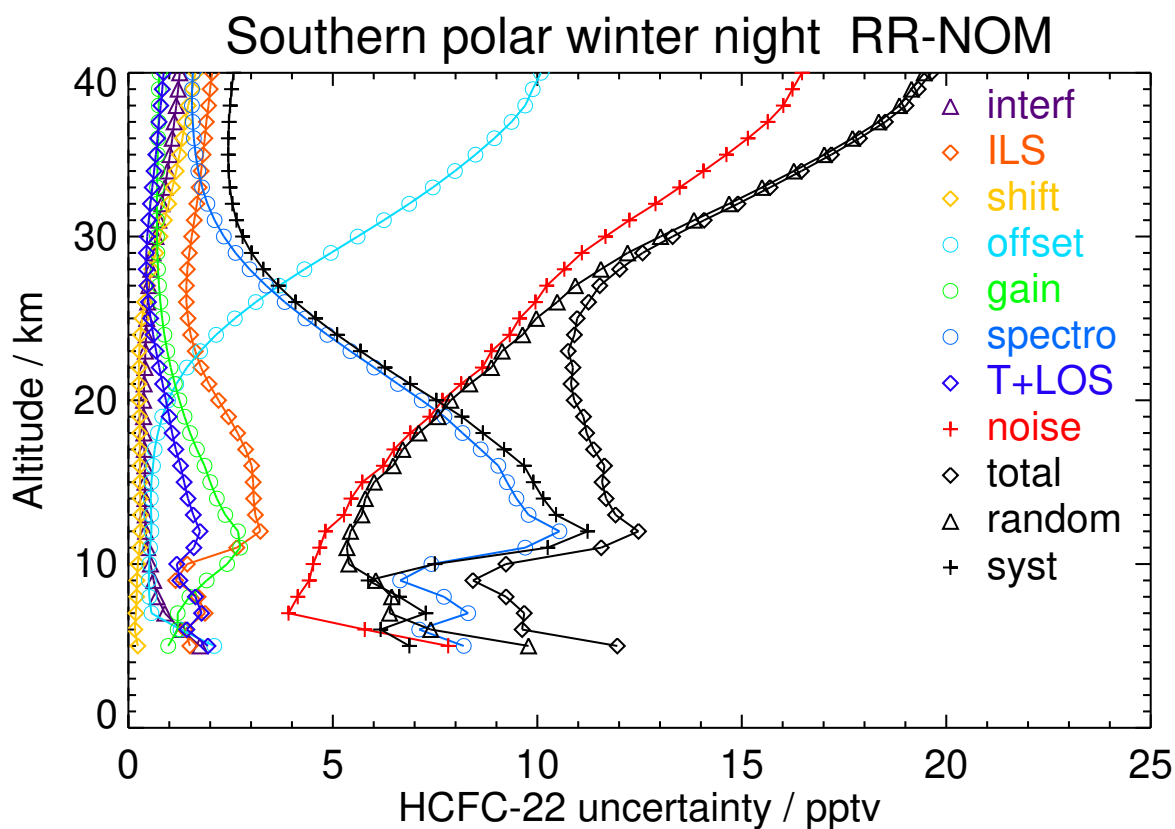

**Figure S62.** V8R\_F-22\_261 Southern polar winter night

**Table S64.** HCFC-22 error budget for Southern polar spring day. All uncertainties are  $1\sigma$ .

| altitude<br>(km) | mean target<br>(pptv) | interf<br>(pptv) | ILS<br>(pptv) | shift<br>(pptv) | offset<br>(pptv) | gain<br>(pptv) | spectro<br>(pptv) | T+LOS<br>(pptv) | noise<br>(pptv) | random<br>(pptv) | syst<br>(pptv) | total<br>(pptv) |
|------------------|-----------------------|------------------|---------------|-----------------|------------------|----------------|-------------------|-----------------|-----------------|------------------|----------------|-----------------|
| 5                | 189.78                | 1.72             | 2.44          | 0.11            | 1.95             | 2.04           | 7.06              | 1.35            | 7.68            | 9.28             | 6.43           | 11.29           |
| 8                | 195.84                | 0.78             | 3.14          | 0.16            | 0.52             | 1.65           | 8.35              | 1.84            | 4.33            | 6.33             | 8.08           | 10.26           |
| 11               | 184.83                | 0.50             | 4.50          | 0.23            | 0.52             | 2.68           | 11.17             | 1.79            | 4.80            | 5.69             | 12.11          | 13.38           |
| 14               | 148.90                | 0.39             | 4.38          | 0.24            | 0.48             | 1.79           | 9.37              | 1.50            | 5.43            | 6.08             | 10.27          | 11.93           |
| 17               | 125.56                | 0.37             | 3.12          | 0.42            | 0.52             | 1.15           | 7.31              | 1.02            | 6.11            | 6.70             | 7.65           | 10.17           |
| 20               | 110.83                | 0.37             | 1.98          | 0.60            | 0.65             | 0.91           | 5.86              | 0.68            | 6.76            | 7.27             | 5.77           | 9.28            |
| 23               | 103.96                | 0.41             | 1.19          | 0.73            | 0.72             | 0.86           | 4.55              | 0.46            | 7.41            | 7.68             | 4.50           | 8.90            |
| 26               | 101.39                | 0.49             | 1.03          | 0.95            | 1.00             | 0.92           | 4.08              | 0.41            | 8.32            | 8.63             | 3.94           | 9.49            |
| 29               | 99.25                 | 0.59             | 1.46          | 1.30            | 1.87             | 0.95           | 3.91              | 0.45            | 8.44            | 9.00             | 3.80           | 9.77            |
| 32               | 95.03                 | 0.77             | 1.87          | 1.68            | 3.35             | 1.02           | 3.66              | 0.53            | 9.26            | 10.22            | 3.76           | 10.89           |
| 35               | 89.33                 | 0.95             | 1.95          | 1.98            | 5.01             | 1.10           | 3.39              | 0.61            | 10.73           | 12.19            | 3.63           | 12.72           |
| 38               | 84.67                 | 1.10             | 1.92          | 2.18            | 6.51             | 1.18           | 3.15              | 0.70            | 12.59           | 14.50            | 3.48           | 14.91           |
| 41               | 80.85                 | 1.19             | 1.88          | 2.28            | 7.65             | 1.24           | 2.97              | 0.76            | 14.10           | 16.34            | 3.37           | 16.69           |

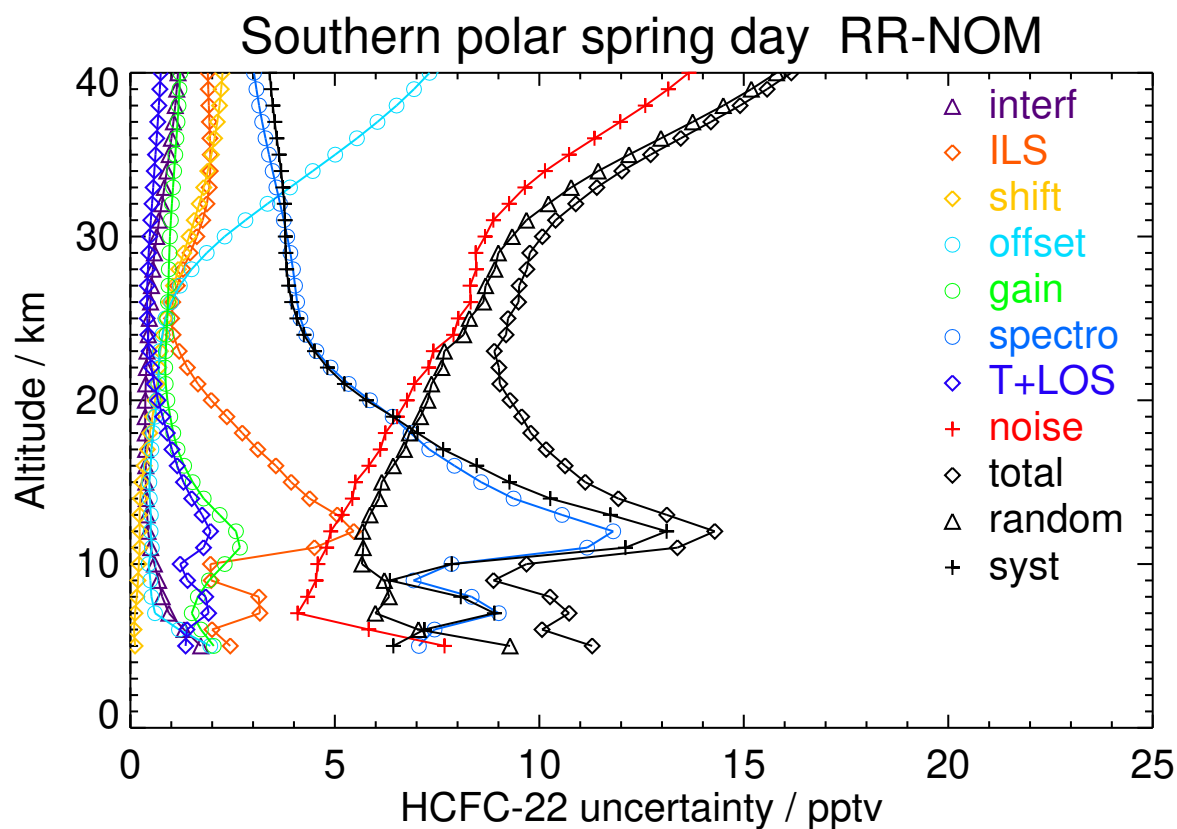

**Figure S63.** V8R\_F-22\_261 Southern polar spring day

**Table S65.** HCFC-22 error budget for Southern polar spring night. All uncertainties are  $1\sigma$ .

| altitude<br>(km) | mean target<br>(pptv) | interf<br>(pptv) | ILS<br>(pptv) | shift<br>(pptv) | offset<br>(pptv) | gain<br>(pptv) | spectro<br>(pptv) | T+LOS<br>(pptv) | noise<br>(pptv) | random<br>(pptv) | syst<br>(pptv) | total<br>(pptv) |
|------------------|-----------------------|------------------|---------------|-----------------|------------------|----------------|-------------------|-----------------|-----------------|------------------|----------------|-----------------|
| 5                | 191.02                | 1.71             | 1.92          | 0.08            | 1.91             | 1.47           | 6.97              | 1.46            | 7.68            | 8.95             | 6.47           | 11.05           |
| 8                | 195.57                | 0.73             | 2.59          | 0.15            | 0.49             | 1.50           | 8.05              | 1.66            | 4.40            | 6.71             | 7.18           | 9.83            |
| 11               | 184.33                | 0.47             | 4.13          | 0.23            | 0.53             | 2.76           | 11.22             | 1.75            | 4.71            | 5.54             | 12.07          | 13.28           |
| 14               | 151.41                | 0.37             | 4.30          | 0.26            | 0.44             | 1.96           | 8.98              | 1.31            | 5.26            | 5.72             | 10.00          | 11.52           |
| 17               | 128.75                | 0.37             | 3.58          | 0.47            | 0.49             | 1.41           | 7.49              | 0.93            | 5.90            | 6.33             | 8.19           | 10.35           |
| 20               | 115.39                | 0.37             | 1.88          | 0.69            | 0.60             | 1.08           | 5.72              | 0.61            | 6.55            | 6.98             | 5.73           | 9.04            |
| 23               | 111.72                | 0.41             | 1.10          | 0.82            | 0.68             | 0.98           | 4.58              | 0.41            | 7.22            | 7.49             | 4.55           | 8.76            |
| 26               | 111.22                | 0.49             | 1.11          | 1.00            | 0.99             | 1.03           | 4.20              | 0.38            | 8.21            | 8.50             | 4.17           | 9.47            |
| 29               | 108.09                | 0.56             | 1.58          | 1.25            | 1.84             | 1.11           | 3.95              | 0.39            | 8.37            | 8.85             | 4.04           | 9.73            |
| 32               | 101.49                | 0.72             | 1.98          | 1.54            | 3.31             | 1.18           | 3.63              | 0.45            | 9.20            | 10.07            | 3.97           | 10.82           |
| 35               | 94.67                 | 0.90             | 2.07          | 1.80            | 4.96             | 1.25           | 3.33              | 0.53            | 10.68           | 12.05            | 3.82           | 12.64           |
| 38               | 89.36                 | 1.05             | 2.06          | 1.98            | 6.45             | 1.31           | 3.09              | 0.60            | 12.56           | 14.37            | 3.68           | 14.84           |
| 41               | 85.16                 | 1.14             | 2.05          | 2.08            | 7.61             | 1.36           | 2.92              | 0.66            | 14.07           | 16.24            | 3.59           | 16.63           |

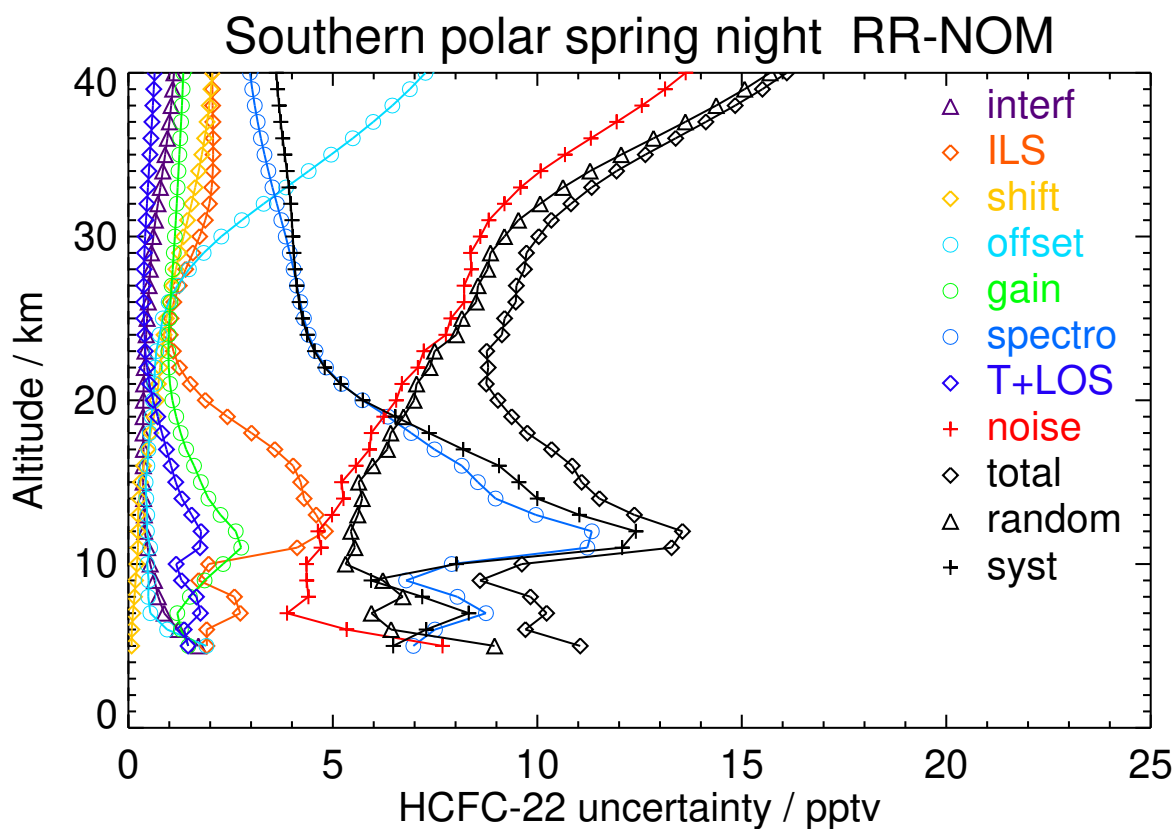

**Figure S64.** V8R\_F-22\_261 Southern polar spring night

**Table S66.** HCFC-22 error budget for Southern polar summer day. All uncertainties are  $1\sigma$ .

| altitude<br>(km) | mean target<br>(pptv) | interf<br>(pptv) | ILS<br>(pptv) | shift<br>(pptv) | offset<br>(pptv) | gain<br>(pptv) | spectro<br>(pptv) | T+LOS<br>(pptv) | noise<br>(pptv) | random<br>(pptv) | syst<br>(pptv) | total<br>(pptv) |
|------------------|-----------------------|------------------|---------------|-----------------|------------------|----------------|-------------------|-----------------|-----------------|------------------|----------------|-----------------|
| 5                | 186.31                | 1.76             | 4.48          | 0.34            | 1.79             | 3.26           | 10.00             | 1.51            | 7.86            | 9.45             | 10.58          | 14.18           |
| 8                | 184.58                | 0.83             | 4.63          | 0.22            | 0.53             | 0.65           | 14.03             | 2.02            | 4.05            | 5.72             | 14.41          | 15.50           |
| 11               | 178.44                | 0.51             | 2.00          | 0.20            | 0.39             | 2.10           | 7.92              | 0.92            | 4.11            | 5.92             | 7.37           | 9.45            |
| 14               | 171.82                | 0.37             | 4.58          | 0.34            | 0.35             | 2.06           | 8.47              | 1.00            | 4.62            | 5.07             | 9.69           | 10.93           |
| 17               | 151.14                | 0.35             | 3.74          | 0.43            | 0.39             | 1.92           | 8.80              | 0.88            | 5.22            | 5.43             | 9.70           | 11.12           |
| 20               | 127.03                | 0.34             | 1.41          | 0.62            | 0.53             | 1.83           | 6.75              | 0.60            | 5.84            | 6.07             | 7.02           | 9.28            |
| 23               | 116.00                | 0.35             | 1.51          | 0.61            | 0.58             | 2.36           | 5.14              | 0.38            | 6.46            | 6.82             | 5.52           | 8.78            |
| 26               | 109.91                | 0.43             | 1.56          | 0.61            | 0.78             | 1.76           | 4.51              | 0.36            | 7.80            | 7.99             | 4.92           | 9.38            |
| 29               | 101.56                | 0.48             | 1.74          | 0.77            | 1.47             | 1.13           | 4.02              | 0.38            | 8.02            | 8.24             | 4.48           | 9.38            |
| 32               | 95.99                 | 0.61             | 1.94          | 1.14            | 2.76             | 0.94           | 3.50              | 0.45            | 8.66            | 9.21             | 4.08           | 10.07           |
| 35               | 88.99                 | 0.81             | 1.86          | 1.58            | 4.35             | 0.93           | 3.07              | 0.58            | 9.72            | 10.83            | 3.67           | 11.43           |
| 38               | 81.75                 | 1.03             | 1.73          | 1.94            | 5.91             | 0.99           | 2.76              | 0.72            | 11.41           | 13.07            | 3.34           | 13.49           |
| 41               | 76.68                 | 1.19             | 1.65          | 2.19            | 7.20             | 1.04           | 2.55              | 0.84            | 12.98           | 15.09            | 3.14           | 15.42           |

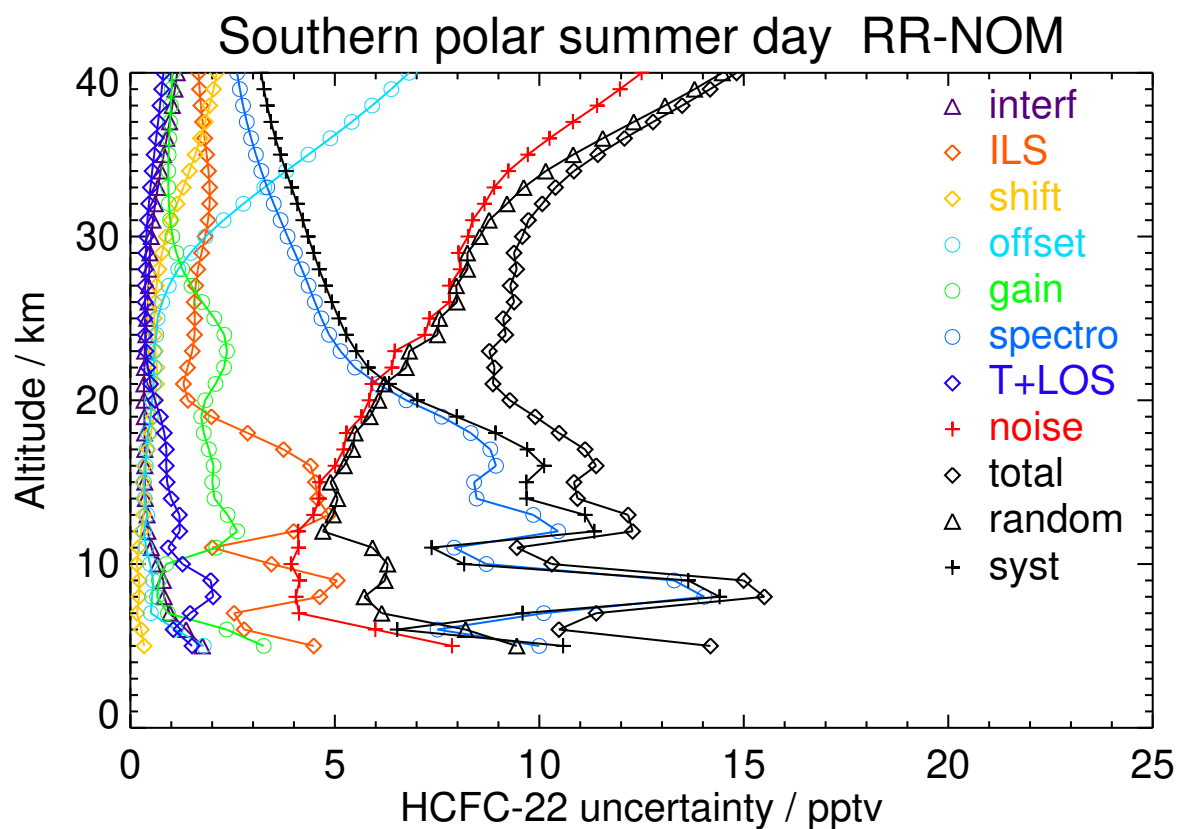

**Figure S65.** V8R\_F-22\_261 Southern polar summer day

**Table S67.** HCFC-22 error budget for Southern polar summer night. All uncertainties are  $1\sigma$ .

| altitude<br>(km) | mean target<br>(pptv) | interf<br>(pptv) | ILS<br>(pptv) | shift<br>(pptv) | offset<br>(pptv) | gain<br>(pptv) | spectro<br>(pptv) | T+LOS<br>(pptv) | noise<br>(pptv) | random<br>(pptv) | syst<br>(pptv) | total<br>(pptv) |
|------------------|-----------------------|------------------|---------------|-----------------|------------------|----------------|-------------------|-----------------|-----------------|------------------|----------------|-----------------|
| 5                | 179.51                | 1.78             | 5.14          | 0.43            | 1.96             | 3.98           | 15.81             | 1.73            | 7.64            | 12.14            | 14.62          | 19.00           |
| 8                | 181.97                | 0.82             | 4.18          | 0.24            | 0.51             | 0.82           | 13.35             | 2.00            | 3.86            | 5.37             | 13.69          | 14.70           |
| 11               | 182.00                | 0.52             | 1.29          | 0.16            | 0.30             | 1.74           | 6.42              | 0.75            | 3.90            | 5.00             | 6.08           | 7.88            |
| 14               | 170.12                | 0.36             | 4.96          | 0.32            | 0.34             | 2.37           | 9.25              | 1.09            | 4.48            | 4.84             | 10.68          | 11.73           |
| 17               | 155.77                | 0.35             | 3.78          | 0.42            | 0.39             | 2.10           | 8.85              | 0.88            | 5.14            | 5.33             | 9.81           | 11.16           |
| 20               | 129.26                | 0.33             | 1.39          | 0.56            | 0.49             | 1.62           | 7.09              | 0.66            | 5.84            | 5.97             | 7.38           | 9.49            |
| 23               | 114.77                | 0.34             | 0.83          | 0.54            | 0.56             | 1.23           | 5.21              | 0.40            | 6.61            | 6.70             | 5.39           | 8.60            |
| 26               | 107.78                | 0.43             | 1.28          | 0.61            | 0.84             | 1.06           | 4.49              | 0.37            | 7.91            | 8.03             | 4.75           | 9.33            |
| 29               | 99.41                 | 0.49             | 1.76          | 0.82            | 1.64             | 0.90           | 3.93              | 0.38            | 8.18            | 8.43             | 4.36           | 9.49            |
| 32               | 88.59                 | 0.61             | 1.85          | 1.17            | 3.02             | 0.83           | 3.32              | 0.43            | 8.83            | 9.45             | 3.85           | 10.21           |
| 35               | 79.95                 | 0.80             | 1.79          | 1.56            | 4.67             | 0.86           | 2.82              | 0.53            | 10.00           | 11.20            | 3.40           | 11.70           |
| 38               | 73.45                 | 0.99             | 1.76          | 1.87            | 6.24             | 0.92           | 2.49              | 0.65            | 11.74           | 13.49            | 3.13           | 13.85           |
| 41               | 68.53                 | 1.14             | 1.77          | 2.07            | 7.51             | 0.97           | 2.30              | 0.75            | 13.31           | 15.50            | 2.99           | 15.78           |

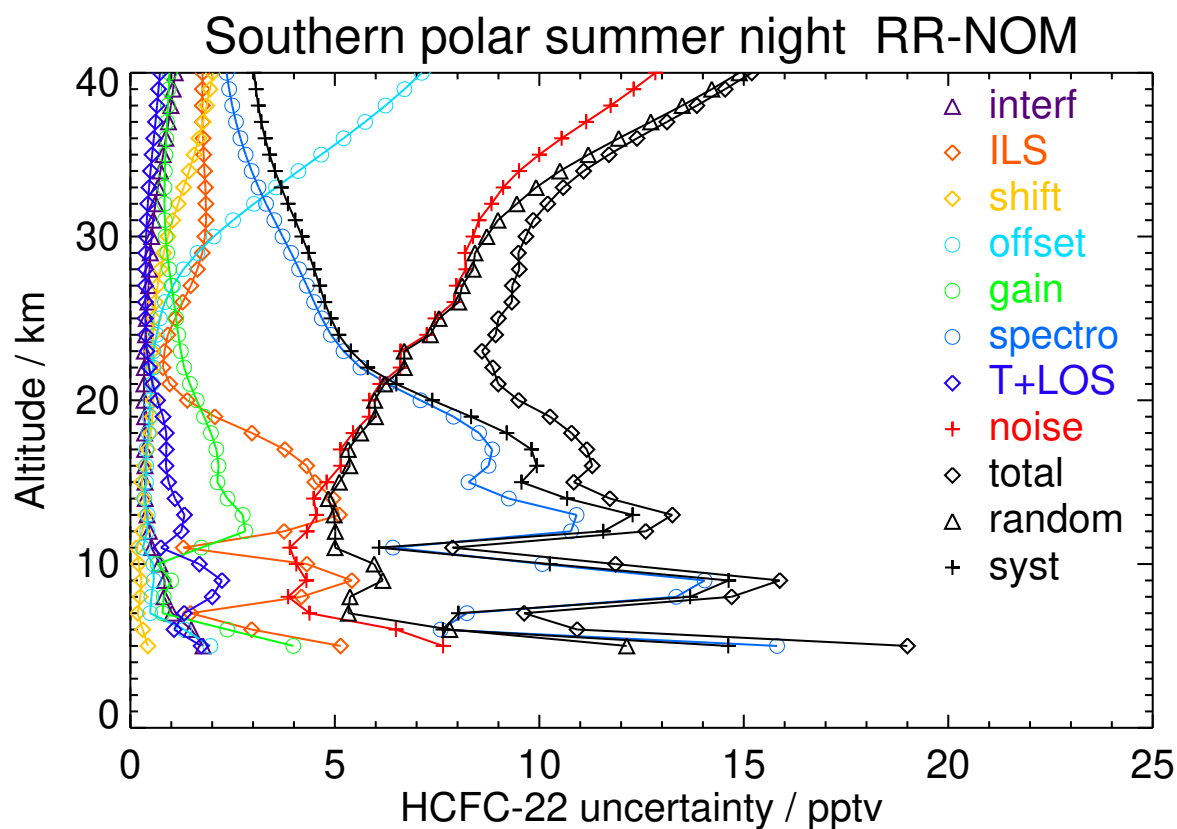

**Figure S66.** V8R\_F-22\_261 Southern polar summer night

**Table S68.** HCFC-22 error budget for Southern polar autumn day. All uncertainties are  $1\sigma$ .

| altitude<br>(km) | mean target<br>(pptv) | interf<br>(pptv) | ILS<br>(pptv) | shift<br>(pptv) | offset<br>(pptv) | gain<br>(pptv) | spectro<br>(pptv) | T+LOS<br>(pptv) | noise<br>(pptv) | random<br>(pptv) | syst<br>(pptv) | total<br>(pptv) |
|------------------|-----------------------|------------------|---------------|-----------------|------------------|----------------|-------------------|-----------------|-----------------|------------------|----------------|-----------------|
| 5                | 184.19                | 1.72             | 1.86          | 0.16            | 2.00             | 2.32           | 6.93              | 1.12            | 7.67            | 9.17             | 6.31           | 11.13           |
| 8                | 184.62                | 0.75             | 1.56          | 0.14            | 0.45             | 1.11           | 7.42              | 1.05            | 4.13            | 5.22             | 7.10           | 8.81            |
| 11               | 184.18                | 0.49             | 2.05          | 0.27            | 0.46             | 2.33           | 8.13              | 0.95            | 4.36            | 5.70             | 7.98           | 9.81            |
| 14               | 172.75                | 0.36             | 3.73          | 0.35            | 0.43             | 2.58           | 9.76              | 1.09            | 4.98            | 5.26             | 10.71          | 11.93           |
| 17               | 148.39                | 0.37             | 2.93          | 0.39            | 0.48             | 2.21           | 9.03              | 0.95            | 5.79            | 6.00             | 9.70           | 11.40           |
| 20               | 124.10                | 0.34             | 1.26          | 0.41            | 0.59             | 1.68           | 6.92              | 0.68            | 6.68            | 6.85             | 7.15           | 9.90            |
| 23               | 109.02                | 0.36             | 0.82          | 0.32            | 0.97             | 1.40           | 5.48              | 0.44            | 7.64            | 7.77             | 5.66           | 9.61            |
| 26               | 94.70                 | 0.45             | 0.91          | 0.34            | 2.08             | 1.25           | 4.50              | 0.36            | 8.90            | 9.19             | 4.72           | 10.33           |
| 29               | 82.98                 | 0.55             | 1.12          | 0.45            | 3.96             | 1.12           | 3.64              | 0.34            | 10.04           | 10.84            | 3.92           | 11.53           |
| 32               | 73.46                 | 0.70             | 1.32          | 0.62            | 6.03             | 1.08           | 2.98              | 0.39            | 12.13           | 13.60            | 3.37           | 14.01           |
| 35               | 65.95                 | 0.85             | 1.46          | 0.77            | 7.77             | 1.08           | 2.56              | 0.47            | 14.11           | 16.18            | 3.06           | 16.46           |
| 38               | 61.25                 | 0.95             | 1.56          | 0.89            | 9.08             | 1.10           | 2.30              | 0.55            | 15.67           | 18.19            | 2.89           | 18.41           |
| 41               | 59.42                 | 1.02             | 1.60          | 1.11            | 9.58             | 1.15           | 2.06              | 0.61            | 16.26           | 18.96            | 2.76           | 19.16           |

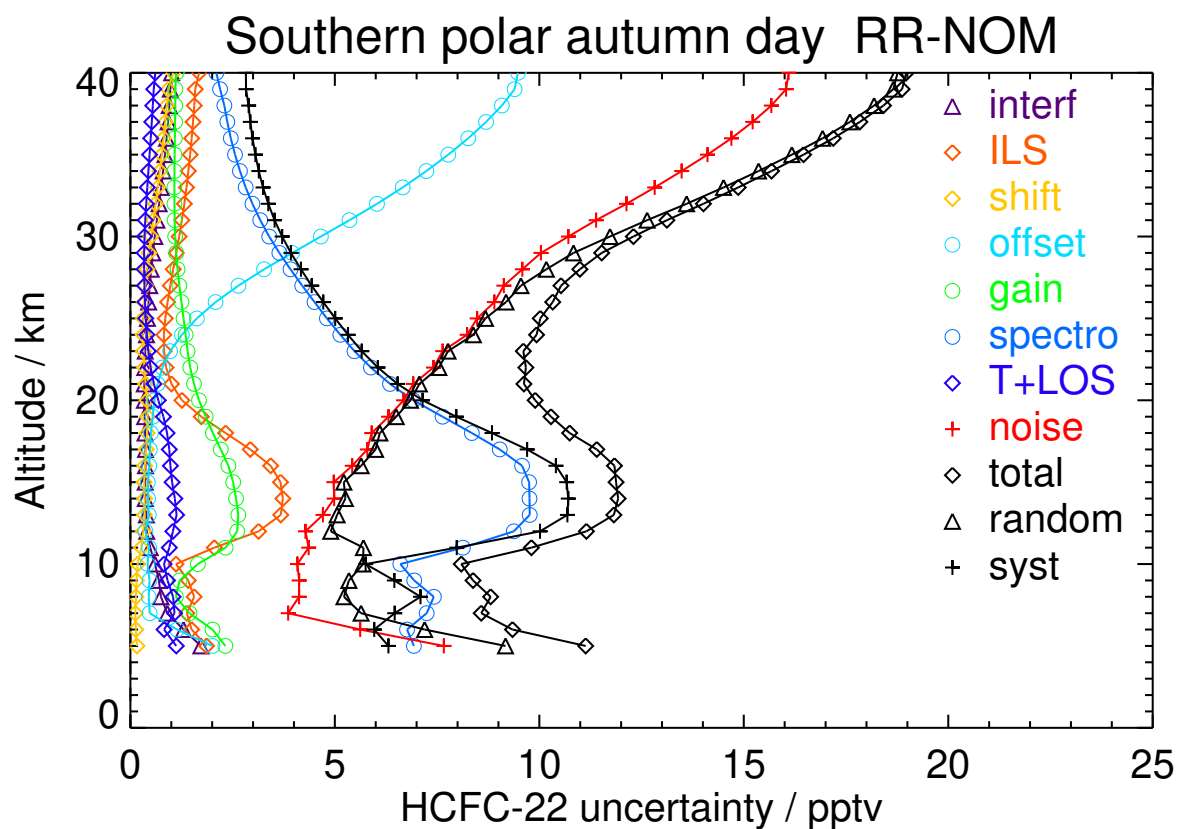

**Figure S67.** V8R\_F-22\_261 Southern polar autumn day

**Table S69.** HCFC-22 error budget for Southern polar autumn night. All uncertainties are  $1\sigma$ .

| altitude<br>(km) | mean target<br>(pptv) | interf<br>(pptv) | ILS<br>(pptv) | shift<br>(pptv) | offset<br>(pptv) | gain<br>(pptv) | spectro<br>(pptv) | T+LOS<br>(pptv) | noise<br>(pptv) | random<br>(pptv) | syst<br>(pptv) | total<br>(pptv) |
|------------------|-----------------------|------------------|---------------|-----------------|------------------|----------------|-------------------|-----------------|-----------------|------------------|----------------|-----------------|
| 5                | 181.19                | 1.67             | 1.78          | 0.17            | 1.87             | 2.16           | 6.36              | 0.94            | 7.30            | 8.21             | 6.43           | 10.43           |
| 8                | 185.38                | 0.78             | 2.15          | 0.18            | 0.49             | 0.86           | 8.94              | 1.41            | 4.30            | 5.80             | 8.54           | 10.33           |
| 11               | 185.39                | 0.51             | 1.88          | 0.26            | 0.47             | 2.27           | 8.06              | 0.96            | 4.45            | 5.35             | 8.14           | 9.75            |
| 14               | 171.68                | 0.37             | 3.64          | 0.34            | 0.44             | 2.40           | 10.08             | 1.22            | 5.06            | 5.35             | 10.93          | 12.17           |
| 17               | 140.62                | 0.37             | 3.03          | 0.38            | 0.51             | 2.01           | 9.12              | 0.99            | 5.92            | 6.18             | 9.73           | 11.53           |
| 20               | 118.58                | 0.35             | 1.38          | 0.37            | 0.62             | 1.47           | 6.58              | 0.67            | 6.83            | 6.97             | 6.81           | 9.75            |
| 23               | 105.15                | 0.38             | 0.95          | 0.29            | 1.08             | 1.26           | 5.30              | 0.43            | 7.82            | 7.96             | 5.47           | 9.66            |
| 26               | 91.14                 | 0.45             | 0.99          | 0.32            | 2.29             | 1.12           | 4.46              | 0.36            | 9.10            | 9.42             | 4.67           | 10.51           |
| 29               | 78.48                 | 0.56             | 1.20          | 0.44            | 4.23             | 1.04           | 3.67              | 0.35            | 10.33           | 11.21            | 3.96           | 11.89           |
| 32               | 68.83                 | 0.72             | 1.40          | 0.60            | 6.32             | 1.01           | 3.02              | 0.41            | 12.47           | 14.03            | 3.42           | 14.44           |
| 35               | 62.31                 | 0.87             | 1.53          | 0.76            | 8.05             | 1.02           | 2.57              | 0.50            | 14.42           | 16.58            | 3.09           | 16.86           |
| 38               | 58.08                 | 0.97             | 1.64          | 0.87            | 9.35             | 1.04           | 2.29              | 0.58            | 15.93           | 18.54            | 2.91           | 18.76           |
| 41               | 58.99                 | 1.04             | 1.66          | 1.13            | 9.64             | 1.13           | 2.21              | 0.59            | 16.33           | 19.05            | 2.87           | 19.26           |

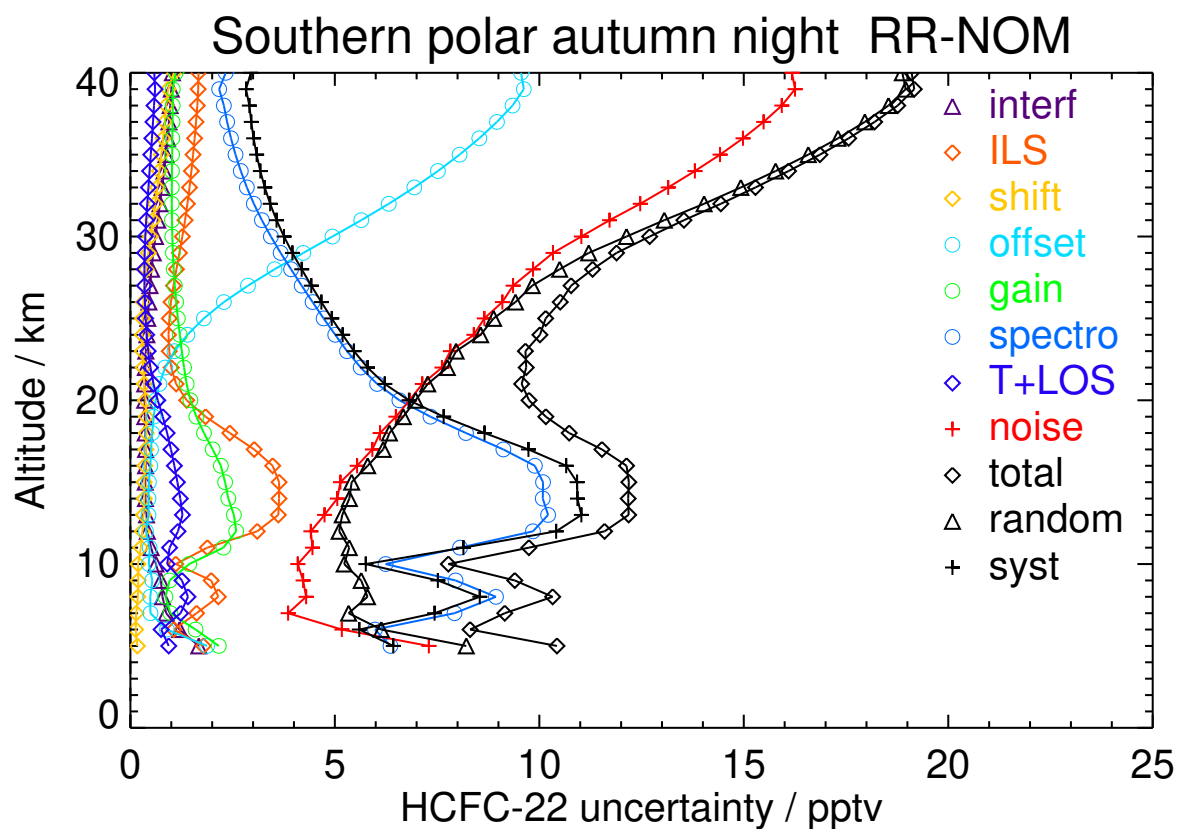

**Figure S68.** V8R\_F-22\_261 Southern polar autumn night

**Table S70.** HCFC-22 error budget for Northern polar winter day. All uncertainties are  $1\sigma$ .

| altitude<br>(km) | mean target<br>(pptv) | interf<br>(pptv) | ILS<br>(pptv) | shift<br>(pptv) | offset<br>(pptv) | gain<br>(pptv) | spectro<br>(pptv) | T+LOS<br>(pptv) | noise<br>(pptv) | random<br>(pptv) | syst<br>(pptv) | total<br>(pptv) |
|------------------|-----------------------|------------------|---------------|-----------------|------------------|----------------|-------------------|-----------------|-----------------|------------------|----------------|-----------------|
| 14               | 116.55                | 2.12             | 0.39          | 0.38            | 2.53             | 1.18           | 4.74              | 0.49            | 8.84            | 9.58             | 4.66           | 10.65           |
| 17               | 133.63                | 1.65             | 0.84          | 0.51            | 1.21             | 1.76           | 6.33              | 0.53            | 6.18            | 6.88             | 6.28           | 9.32            |
| 20               | 127.47                | 1.21             | 0.74          | 0.69            | 1.12             | 1.50           | 5.63              | 0.41            | 6.86            | 7.31             | 5.60           | 9.21            |
| 23               | 123.21                | 0.93             | 0.75          | 0.79            | 1.03             | 1.32           | 5.23              | 0.35            | 7.81            | 8.15             | 5.19           | 9.66            |
| 26               | 118.96                | 0.73             | 0.91          | 0.81            | 1.58             | 1.26           | 4.87              | 0.31            | 8.63            | 8.92             | 4.99           | 10.22           |
| 29               | 111.10                | 0.65             | 1.08          | 0.81            | 3.24             | 1.25           | 4.51              | 0.29            | 9.76            | 10.37            | 4.74           | 11.40           |
| 32               | 99.49                 | 0.71             | 1.12          | 0.81            | 5.39             | 1.27           | 4.08              | 0.29            | 11.83           | 13.06            | 4.38           | 13.78           |
| 35               | 89.40                 | 0.80             | 1.09          | 0.81            | 7.32             | 1.29           | 3.72              | 0.31            | 14.01           | 15.86            | 4.04           | 16.37           |
| 38               | 82.90                 | 0.85             | 1.06          | 0.81            | 8.77             | 1.30           | 3.45              | 0.33            | 15.63           | 17.97            | 3.78           | 18.37           |
| 41               | 79.92                 | 0.92             | 1.17          | 0.96            | 9.30             | 1.23           | 3.18              | 0.39            | 15.97           | 18.54            | 3.56           | 18.88           |
| 44               | 85.18                 | 0.94             | 1.16          | 1.01            | 9.96             | 1.21           | 3.11              | 0.41            | 16.39           | 19.25            | 3.46           | 19.55           |
| 46               | 78.98                 | 0.92             | 1.16          | 0.93            | 10.60            | 1.31           | 2.97              | 0.41            | 16.93           | 20.04            | 3.39           | 20.32           |

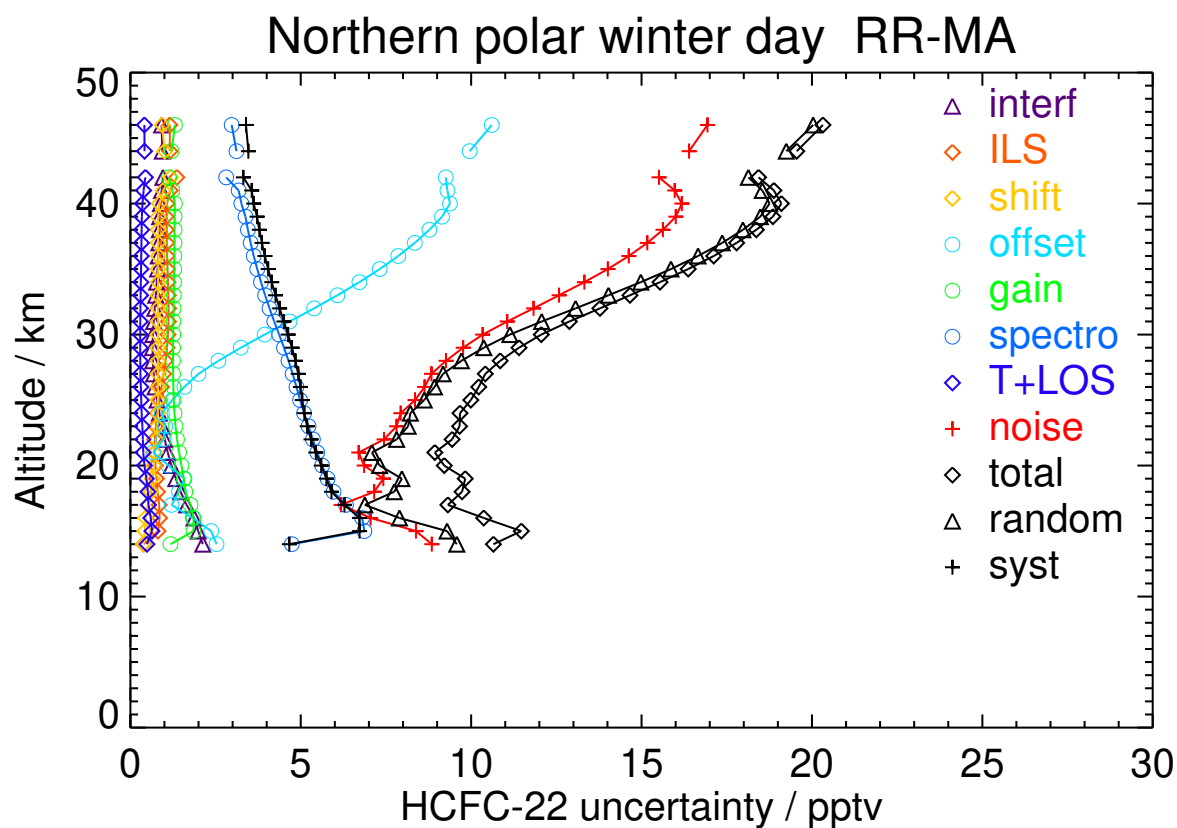

**Figure S69.** V8R\_F-22\_561 Northern polar winter day

**Table S71.** HCFC-22 error budget for Northern polar winter night. All uncertainties are  $1\sigma$ .

| altitude<br>(km) | mean target<br>(pptv) | interf<br>(pptv) | ILS<br>(pptv) | shift<br>(pptv) | offset<br>(pptv) | gain<br>(pptv) | spectro<br>(pptv) | T+LOS<br>(pptv) | noise<br>(pptv) | random<br>(pptv) | syst<br>(pptv) | total<br>(pptv) |
|------------------|-----------------------|------------------|---------------|-----------------|------------------|----------------|-------------------|-----------------|-----------------|------------------|----------------|-----------------|
| 14               | 153.14                | 2.02             | 0.91          | 0.45            | 2.34             | 2.02           | 7.74              | 0.74            | 8.33            | 8.97             | 8.01           | 12.02           |
| 17               | 125.74                | 1.72             | 1.24          | 0.41            | 2.19             | 1.48           | 6.40              | 0.68            | 9.59            | 10.17            | 6.44           | 12.04           |
| 20               | 120.42                | 1.38             | 1.23          | 0.49            | 1.37             | 1.33           | 6.17              | 0.66            | 8.41            | 8.80             | 6.25           | 10.79           |
| 23               | 105.76                | 1.03             | 1.12          | 0.54            | 1.55             | 1.15           | 5.48              | 0.57            | 8.89            | 9.19             | 5.60           | 10.76           |
| 26               | 90.26                 | 0.78             | 1.05          | 0.57            | 2.80             | 1.02           | 4.51              | 0.46            | 10.07           | 10.55            | 4.64           | 11.52           |
| 29               | 79.32                 | 0.71             | 1.02          | 0.64            | 4.84             | 0.99           | 3.65              | 0.41            | 11.58           | 12.65            | 3.74           | 13.19           |
| 32               | 70.58                 | 0.79             | 1.02          | 0.73            | 7.04             | 1.01           | 3.08              | 0.43            | 13.70           | 15.50            | 3.13           | 15.81           |
| 35               | 65.03                 | 0.90             | 1.02          | 0.80            | 8.87             | 1.04           | 2.76              | 0.49            | 15.65           | 18.09            | 2.78           | 18.30           |
| 38               | 61.59                 | 0.98             | 1.02          | 0.86            | 10.24            | 1.07           | 2.57              | 0.54            | 17.04           | 19.99            | 2.59           | 20.15           |
| 41               | 37.37                 | 1.12             | 0.89          | 1.05            | 11.40            | 0.78           | 1.41              | 0.76            | 17.96           | 21.35            | 1.73           | 21.42           |
| 44               | 29.55                 | 1.16             | 1.04          | 1.10            | 12.26            | 0.81           | 1.43              | 0.81            | 18.59           | 22.36            | 1.77           | 22.43           |
| 46               | 44.91                 | 1.14             | 1.09          | 1.04            | 12.79            | 0.92           | 1.76              | 0.79            | 18.91           | 22.92            | 2.01           | 23.01           |

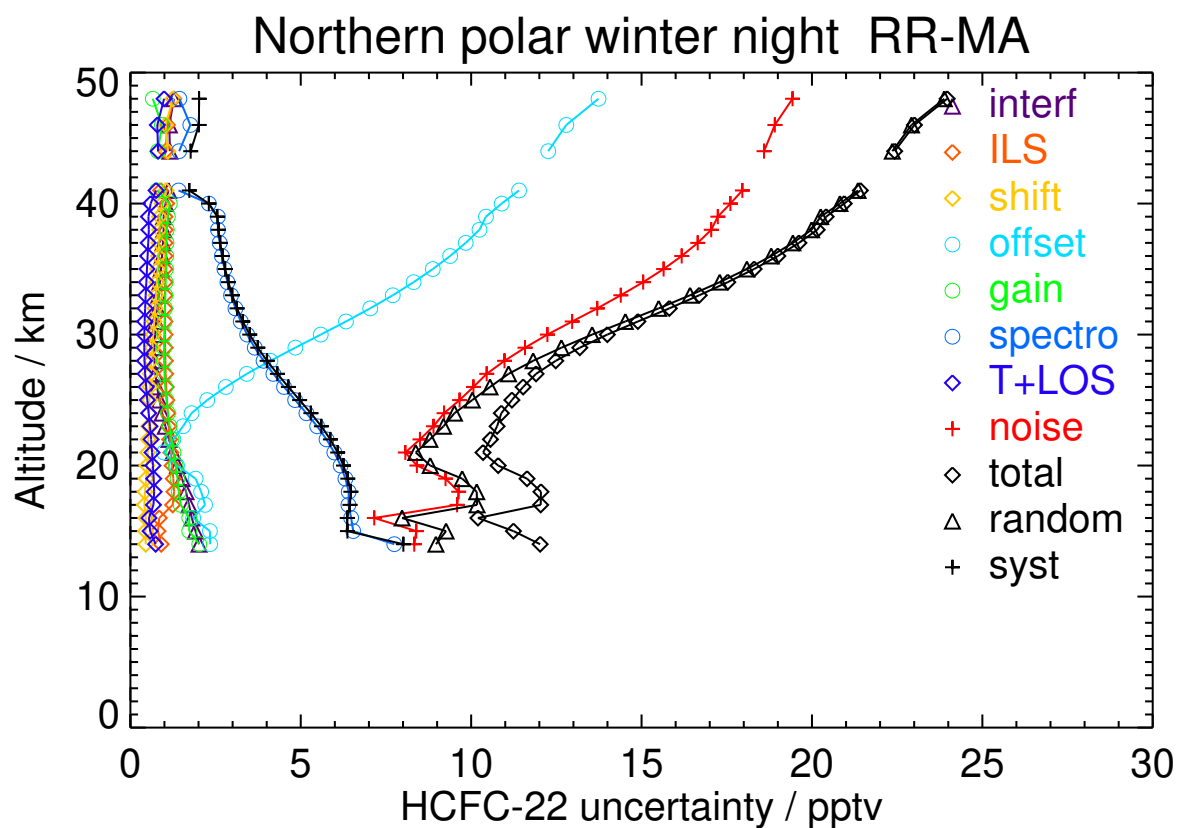

**Figure S70.** V8R\_F-22\_561 Northern polar winter night

**Table S72.** HCFC-22 error budget for Northern polar spring day. All uncertainties are  $1\sigma$ .

| altitude<br>(km) | mean target<br>(pptv) | interf<br>(pptv) | ILS<br>(pptv) | shift<br>(pptv) | offset<br>(pptv) | gain<br>(pptv) | spectro<br>(pptv) | T+LOS<br>(pptv) | noise<br>(pptv) | random<br>(pptv) | syst<br>(pptv) | total<br>(pptv) |
|------------------|-----------------------|------------------|---------------|-----------------|------------------|----------------|-------------------|-----------------|-----------------|------------------|----------------|-----------------|
| 17               | 128.22                | 1.60             | 0.99          | 0.52            | 2.62             | 1.47           | 6.13              | 0.64            | 10.87           | 11.40            | 6.23           | 13.00           |
| 20               | 123.49                | 1.32             | 0.98          | 0.53            | 0.76             | 1.66           | 5.79              | 0.54            | 6.97            | 7.27             | 5.99           | 9.42            |
| 23               | 114.33                | 0.96             | 0.90          | 0.54            | 1.04             | 1.66           | 5.18              | 0.43            | 8.37            | 8.58             | 5.41           | 10.14           |
| 26               | 103.91                | 0.77             | 1.01          | 0.59            | 1.66             | 1.18           | 4.58              | 0.35            | 9.35            | 9.57             | 4.79           | 10.71           |
| 29               | 91.64                 | 0.66             | 1.22          | 0.76            | 3.18             | 0.93           | 3.87              | 0.36            | 10.24           | 10.79            | 4.13           | 11.55           |
| 32               | 81.64                 | 0.73             | 1.28          | 1.00            | 5.03             | 0.81           | 3.23              | 0.46            | 11.58           | 12.71            | 3.51           | 13.18           |
| 35               | 73.90                 | 0.88             | 1.23          | 1.23            | 6.79             | 0.76           | 2.76              | 0.59            | 13.24           | 14.99            | 3.03           | 15.29           |
| 38               | 67.86                 | 1.02             | 1.19          | 1.41            | 8.30             | 0.74           | 2.45              | 0.72            | 14.84           | 17.12            | 2.72           | 17.33           |
| 41               | 63.36                 | 1.12             | 1.17          | 1.52            | 9.44             | 0.74           | 2.26              | 0.82            | 16.04           | 18.74            | 2.54           | 18.91           |
| 44               | 60.24                 | 1.17             | 1.18          | 1.59            | 10.24            | 0.73           | 2.15              | 0.88            | 16.78           | 19.79            | 2.43           | 19.94           |
| 46               | 56.98                 | 1.21             | 1.18          | 1.63            | 10.98            | 0.72           | 2.05              | 0.94            | 17.40           | 20.71            | 2.34           | 20.84           |
| 50               | 53.89                 | 1.25             | 1.28          | 1.84            | 11.25            | 0.58           | 1.86              | 0.99            | 17.43           | 20.90            | 2.24           | 21.02           |

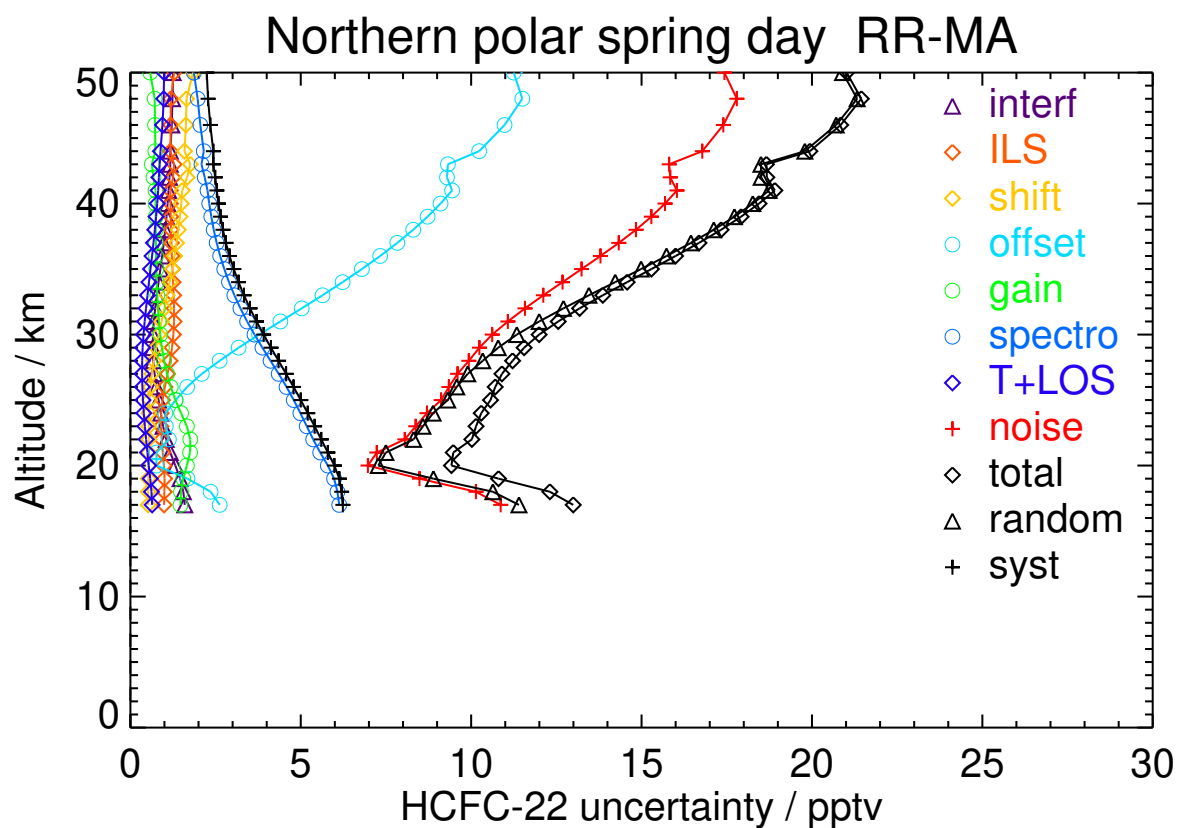

**Figure S71.** V8R\_F-22\_561 Northern polar spring day

**Table S73.** HCFC-22 error budget for Northern polar spring night. All uncertainties are  $1\sigma$ .

| altitude<br>(km) | mean target<br>(pptv) | interf<br>(pptv) | ILS<br>(pptv) | shift<br>(pptv) | offset<br>(pptv) | gain<br>(pptv) | spectro<br>(pptv) | T+LOS<br>(pptv) | noise<br>(pptv) | random<br>(pptv) | syst<br>(pptv) | total<br>(pptv) |
|------------------|-----------------------|------------------|---------------|-----------------|------------------|----------------|-------------------|-----------------|-----------------|------------------|----------------|-----------------|
| 17               | 133.45                | 1.61             | 1.04          | 0.51            | 2.61             | 1.51           | 6.42              | 0.67            | 10.67           | 11.21            | 6.55           | 12.99           |
| 20               | 127.06                | 1.33             | 1.06          | 0.52            | 0.82             | 1.54           | 6.03              | 0.55            | 6.92            | 7.24             | 6.20           | 9.53            |
| 23               | 119.24                | 0.97             | 1.04          | 0.54            | 1.07             | 1.51           | 5.50              | 0.45            | 8.32            | 8.55             | 5.68           | 10.27           |
| 26               | 109.82                | 0.76             | 1.16          | 0.62            | 1.57             | 1.21           | 4.85              | 0.38            | 9.28            | 9.51             | 5.06           | 10.77           |
| 29               | 95.29                 | 0.65             | 1.30          | 0.81            | 2.97             | 0.97           | 4.01              | 0.38            | 10.04           | 10.56            | 4.26           | 11.39           |
| 32               | 81.47                 | 0.72             | 1.29          | 1.06            | 4.76             | 0.85           | 3.23              | 0.47            | 11.27           | 12.34            | 3.50           | 12.82           |
| 35               | 71.36                 | 0.88             | 1.18          | 1.29            | 6.51             | 0.79           | 2.67              | 0.60            | 12.90           | 14.57            | 2.93           | 14.86           |
| 38               | 64.67                 | 1.01             | 1.09          | 1.46            | 8.02             | 0.76           | 2.35              | 0.72            | 14.52           | 16.71            | 2.58           | 16.91           |
| 41               | 60.55                 | 1.11             | 1.05          | 1.57            | 9.17             | 0.75           | 2.18              | 0.82            | 15.74           | 18.35            | 2.40           | 18.51           |
| 44               | 57.93                 | 1.16             | 1.03          | 1.63            | 9.98             | 0.74           | 2.08              | 0.89            | 16.50           | 19.42            | 2.30           | 19.55           |
| 46               | 55.32                 | 1.20             | 1.02          | 1.66            | 10.73            | 0.73           | 2.00              | 0.94            | 17.13           | 20.35            | 2.22           | 20.47           |
| 50               | 55.13                 | 1.24             | 1.08          | 1.78            | 11.42            | 0.63           | 1.92              | 1.01            | 17.57           | 21.11            | 2.17           | 21.22           |

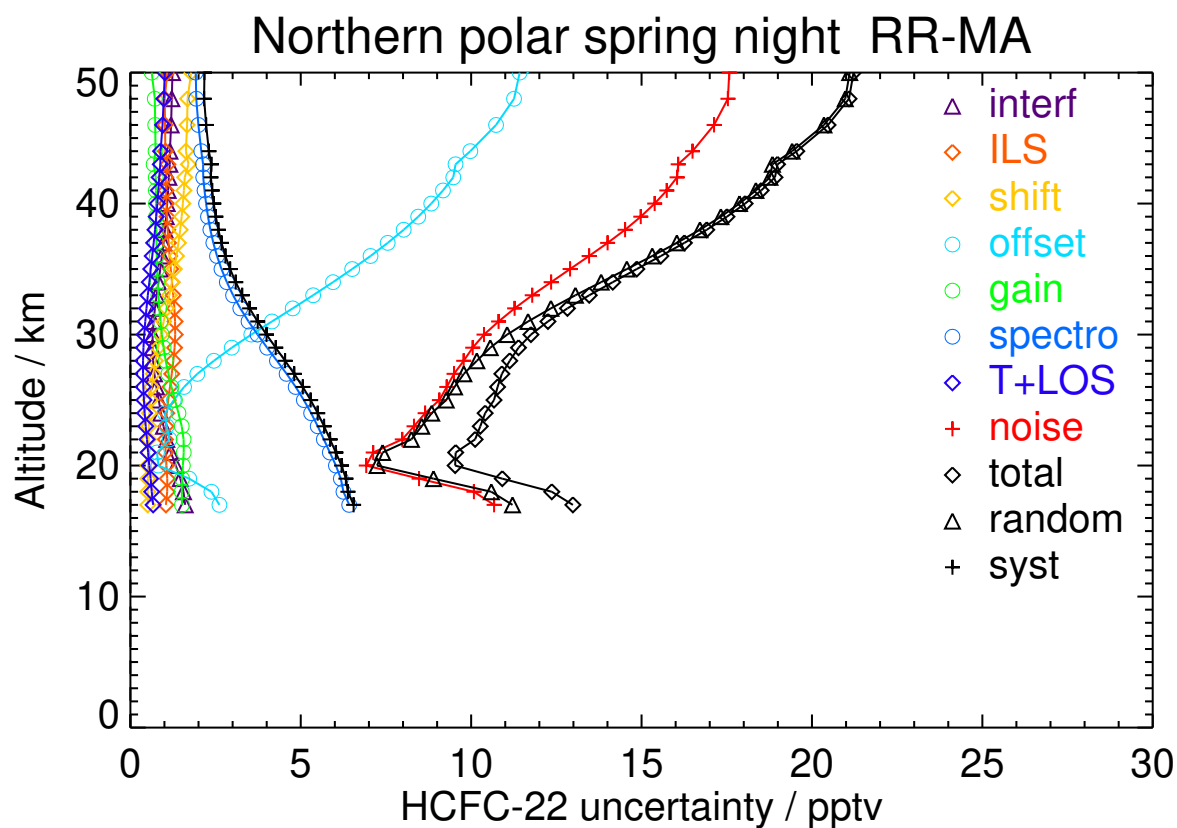

**Figure S72.** V8R\_F-22\_561 Northern polar spring night

**Table S74.** HCFC-22 error budget for Northern polar summer day. All uncertainties are  $1\sigma$ .

| altitude<br>(km) | mean target<br>(pptv) | interf<br>(pptv) | ILS<br>(pptv) | shift<br>(pptv) | offset<br>(pptv) | gain<br>(pptv) | spectro<br>(pptv) | T+LOS<br>(pptv) | noise<br>(pptv) | random<br>(pptv) | syst<br>(pptv) | total<br>(pptv) |
|------------------|-----------------------|------------------|---------------|-----------------|------------------|----------------|-------------------|-----------------|-----------------|------------------|----------------|-----------------|
| 17               | 151.31                | 1.69             | 0.94          | 0.52            | 2.30             | 1.72           | 7.29              | 0.73            | 9.77            | 10.26            | 7.48           | 12.70           |
| 20               | 141.99                | 1.40             | 0.89          | 0.52            | 0.55             | 1.61           | 6.87              | 0.61            | 5.81            | 6.10             | 7.08           | 9.35            |
| 23               | 123.58                | 1.02             | 0.79          | 0.56            | 0.84             | 1.33           | 5.95              | 0.47            | 7.49            | 7.66             | 6.13           | 9.81            |
| 26               | 111.93                | 0.77             | 1.15          | 0.65            | 0.80             | 1.09           | 5.07              | 0.40            | 8.24            | 8.36             | 5.29           | 9.89            |
| 29               | 101.52                | 0.59             | 1.60          | 0.86            | 1.41             | 0.85           | 4.24              | 0.42            | 8.75            | 8.94             | 4.59           | 10.05           |
| 32               | 88.63                 | 0.63             | 1.68          | 1.19            | 2.58             | 0.62           | 3.44              | 0.49            | 9.25            | 9.72             | 3.86           | 10.46           |
| 35               | 77.46                 | 0.79             | 1.51          | 1.53            | 4.06             | 0.49           | 2.82              | 0.62            | 10.20           | 11.14            | 3.21           | 11.59           |
| 38               | 68.59                 | 0.96             | 1.39          | 1.81            | 5.59             | 0.41           | 2.42              | 0.77            | 11.63           | 13.09            | 2.78           | 13.39           |
| 41               | 62.92                 | 1.10             | 1.34          | 2.01            | 6.92             | 0.37           | 2.19              | 0.91            | 13.03           | 14.96            | 2.55           | 15.18           |
| 44               | 59.37                 | 1.19             | 1.33          | 2.13            | 7.96             | 0.34           | 2.06              | 1.02            | 14.10           | 16.42            | 2.42           | 16.59           |
| 46               | 56.19                 | 1.27             | 1.33          | 2.22            | 9.05             | 0.30           | 1.94              | 1.12            | 15.23           | 17.95            | 2.32           | 18.09           |
| 50               | 51.38                 | 1.36             | 1.35          | 2.29            | 10.50            | 0.27           | 1.79              | 1.24            | 16.77           | 20.02            | 2.20           | 20.14           |

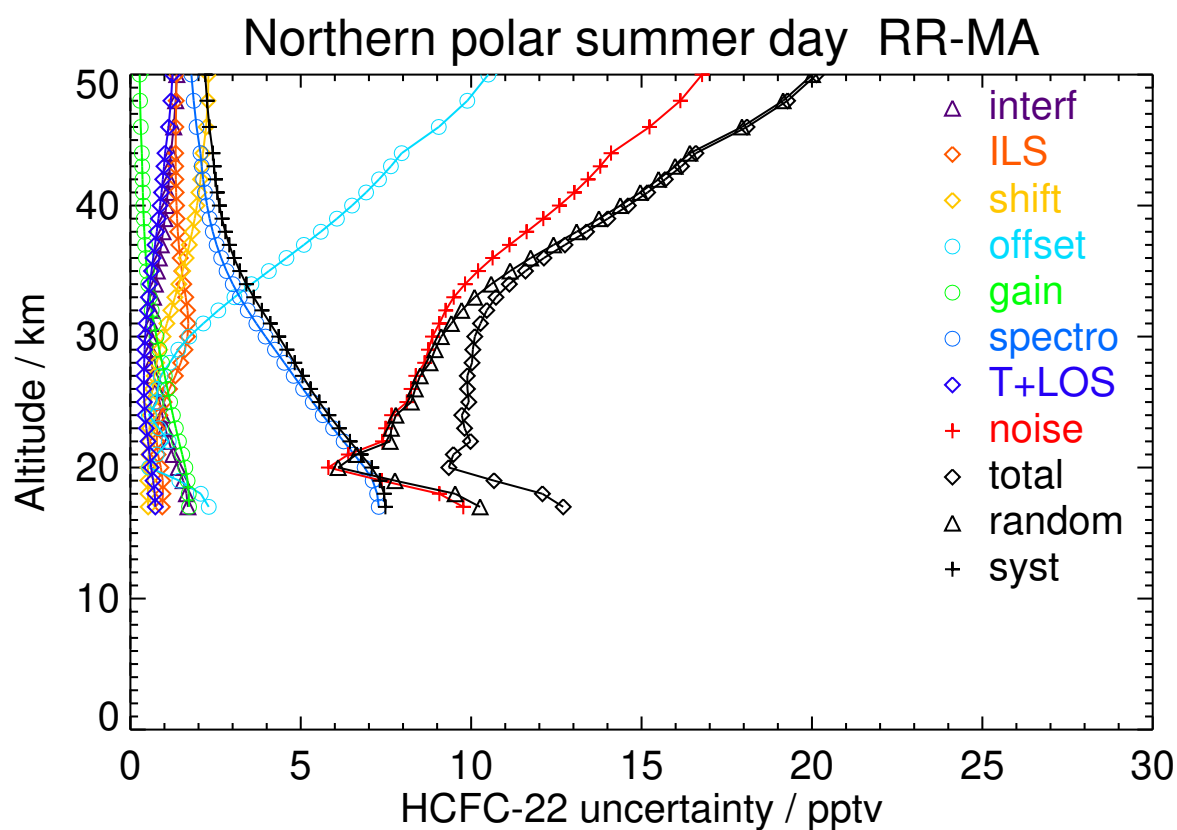

**Figure S73.** V8R\_F-22\_561 Northern polar summer day

**Table S75.** HCFC-22 error budget for Northern polar summer night. All uncertainties are  $1\sigma$ .

| altitude<br>(km) | mean target<br>(pptv) | interf<br>(pptv) | ILS<br>(pptv) | shift<br>(pptv) | offset<br>(pptv) | gain<br>(pptv) | spectro<br>(pptv) | T+LOS<br>(pptv) | noise<br>(pptv) | random<br>(pptv) | syst<br>(pptv) | total<br>(pptv) |
|------------------|-----------------------|------------------|---------------|-----------------|------------------|----------------|-------------------|-----------------|-----------------|------------------|----------------|-----------------|
| 17               | 154.34                | 1.63             | 1.14          | 0.49            | 2.48             | 1.86           | 7.82              | 0.78            | 9.72            | 10.26            | 8.05           | 13.04           |
| 20               | 141.26                | 1.36             | 1.08          | 0.50            | 0.70             | 1.68           | 7.15              | 0.65            | 6.02            | 6.31             | 7.38           | 9.71            |
| 23               | 123.90                | 1.00             | 0.92          | 0.58            | 0.97             | 1.36           | 6.16              | 0.51            | 7.75            | 7.93             | 6.35           | 10.16           |
| 26               | 111.13                | 0.77             | 1.15          | 0.67            | 1.01             | 1.10           | 5.13              | 0.40            | 8.50            | 8.65             | 5.36           | 10.17           |
| 29               | 98.06                 | 0.62             | 1.42          | 0.86            | 1.91             | 0.88           | 4.14              | 0.39            | 9.01            | 9.29             | 4.43           | 10.30           |
| 32               | 85.15                 | 0.66             | 1.47          | 1.10            | 3.39             | 0.74           | 3.30              | 0.45            | 9.79            | 10.46            | 3.65           | 11.08           |
| 35               | 75.89                 | 0.80             | 1.37          | 1.34            | 5.05             | 0.69           | 2.73              | 0.55            | 11.16           | 12.37            | 3.09           | 12.75           |
| 38               | 70.22                 | 0.95             | 1.28          | 1.53            | 6.63             | 0.66           | 2.38              | 0.67            | 12.81           | 14.56            | 2.73           | 14.81           |
| 41               | 65.82                 | 1.06             | 1.23          | 1.66            | 7.90             | 0.65           | 2.20              | 0.78            | 14.23           | 16.42            | 2.54           | 16.62           |
| 44               | 62.53                 | 1.12             | 1.21          | 1.73            | 8.83             | 0.65           | 2.09              | 0.85            | 15.18           | 17.71            | 2.43           | 17.88           |
| 46               | 59.27                 | 1.17             | 1.20          | 1.77            | 9.72             | 0.63           | 2.00              | 0.92            | 16.04           | 18.91            | 2.34           | 19.06           |
| 50               | 54.95                 | 1.21             | 1.20          | 1.79            | 10.82            | 0.61           | 1.87              | 0.99            | 17.03           | 20.33            | 2.22           | 20.45           |

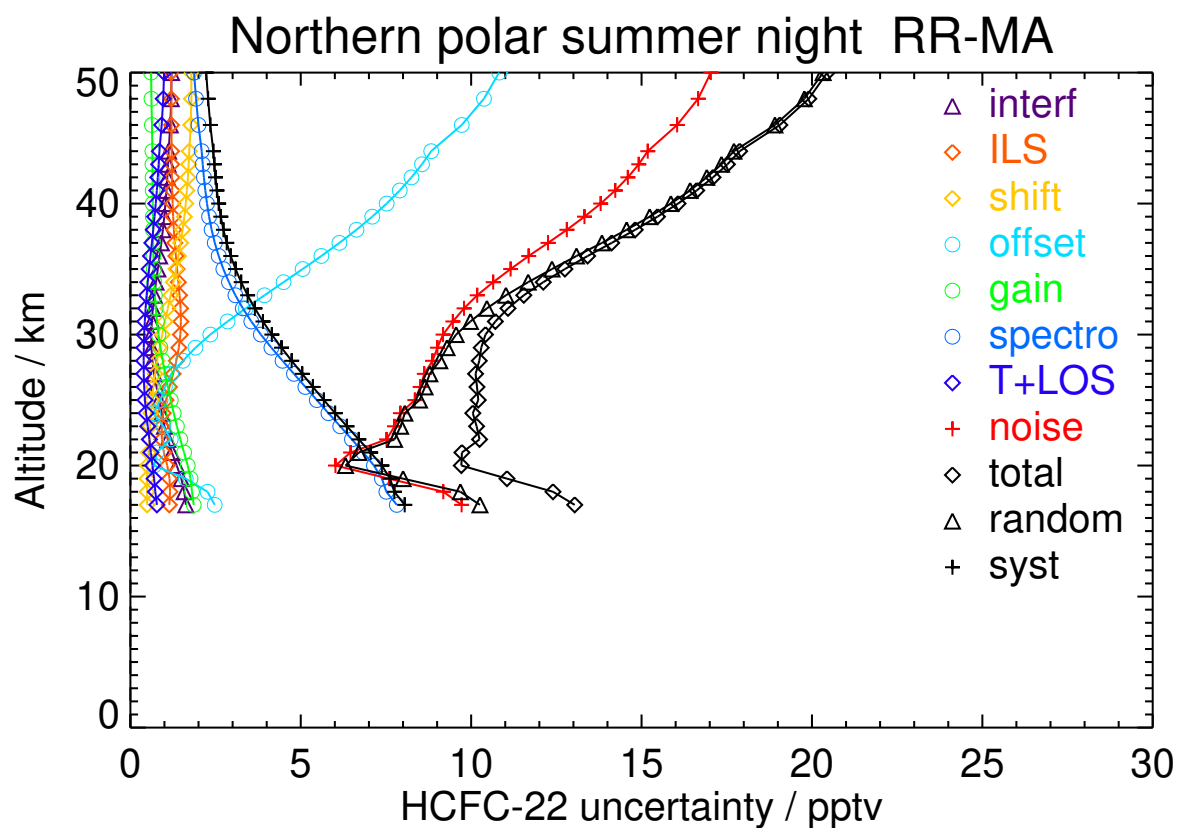

**Figure S74.** V8R\_F-22\_561 Northern polar summer night

**Table S76.** HCFC-22 error budget for Northern polar autumn day. All uncertainties are  $1\sigma$ .

| altitude<br>(km) | mean target<br>(pptv) | interf<br>(pptv) | ILS<br>(pptv) | shift<br>(pptv) | offset<br>(pptv) | gain<br>(pptv) | spectro<br>(pptv) | T+LOS<br>(pptv) | noise<br>(pptv) | random<br>(pptv) | syst<br>(pptv) | total<br>(pptv) |
|------------------|-----------------------|------------------|---------------|-----------------|------------------|----------------|-------------------|-----------------|-----------------|------------------|----------------|-----------------|
| 17               | 141.94                | 1.56             | 1.08          | 0.47            | 2.65             | 1.59           | 7.00              | 0.69            | 10.65           | 11.19            | 7.14           | 13.28           |
| 20               | 134.38                | 1.32             | 1.07          | 0.46            | 0.93             | 1.55           | 6.76              | 0.64            | 6.96            | 7.28             | 6.93           | 10.05           |
| 23               | 118.48                | 0.95             | 1.02          | 0.48            | 1.12             | 1.41           | 6.13              | 0.56            | 8.30            | 8.50             | 6.31           | 10.59           |
| 26               | 101.15                | 0.74             | 1.03          | 0.54            | 1.73             | 1.16           | 5.13              | 0.43            | 9.25            | 9.49             | 5.31           | 10.87           |
| 29               | 84.97                 | 0.65             | 1.12          | 0.66            | 3.38             | 0.99           | 4.06              | 0.38            | 10.27           | 10.88            | 4.27           | 11.69           |
| 32               | 70.59                 | 0.72             | 1.16          | 0.80            | 5.37             | 0.93           | 3.22              | 0.41            | 11.98           | 13.19            | 3.48           | 13.65           |
| 35               | 61.48                 | 0.86             | 1.15          | 0.92            | 7.19             | 0.92           | 2.67              | 0.47            | 13.90           | 15.72            | 2.96           | 16.00           |
| 38               | 55.72                 | 0.96             | 1.13          | 1.01            | 8.66             | 0.94           | 2.33              | 0.55            | 15.52           | 17.85            | 2.65           | 18.05           |
| 41               | 52.54                 | 1.02             | 1.13          | 1.09            | 9.65             | 0.95           | 2.14              | 0.61            | 16.54           | 19.24            | 2.48           | 19.40           |
| 44               | 49.91                 | 1.05             | 1.13          | 1.10            | 10.38            | 0.96           | 2.01              | 0.64            | 17.19           | 20.17            | 2.38           | 20.31           |
| 46               | 47.44                 | 1.06             | 1.12          | 1.11            | 11.01            | 0.97           | 1.89              | 0.67            | 17.64           | 20.88            | 2.28           | 21.00           |

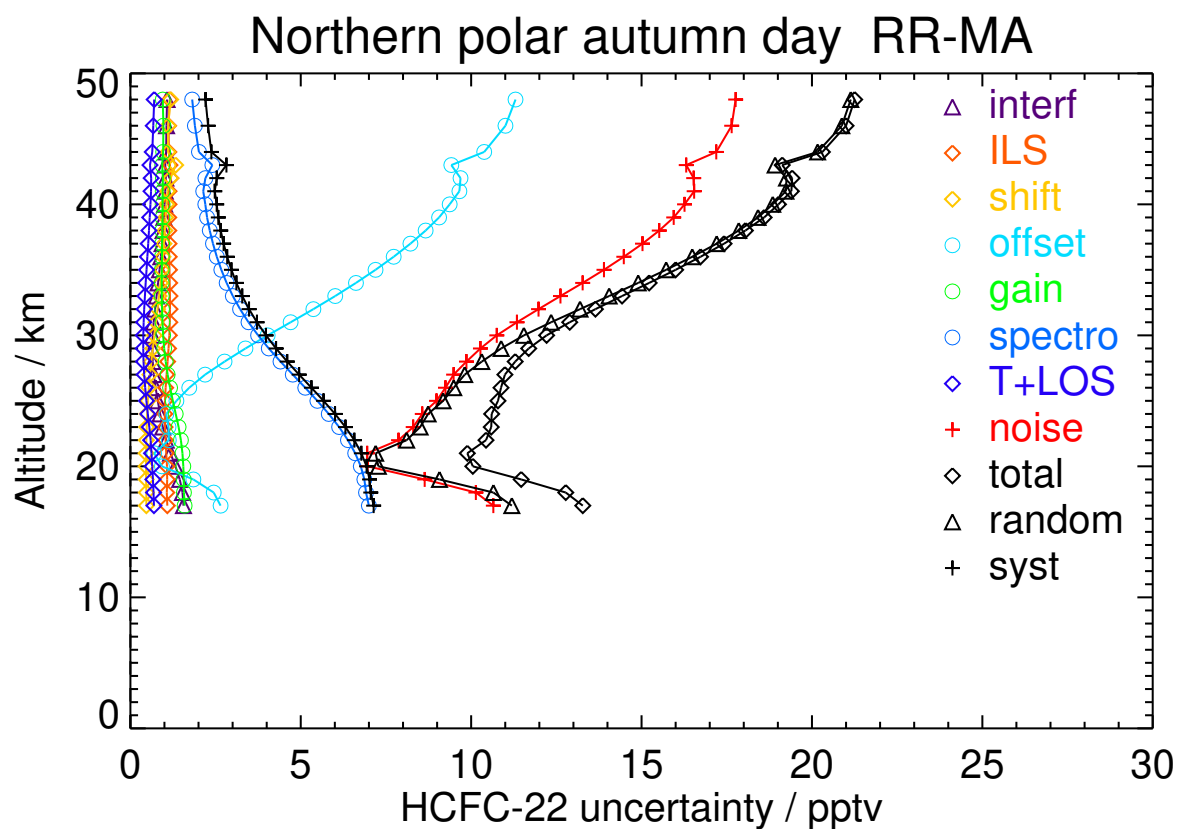

**Figure S75.** V8R\_F-22\_561 Northern polar autumn day

**Table S77.** HCFC-22 error budget for Northern polar autumn night. All uncertainties are  $1\sigma$ .

| altitude<br>(km) | mean target<br>(pptv) | interf<br>(pptv) | ILS<br>(pptv) | shift<br>(pptv) | offset<br>(pptv) | gain<br>(pptv) | spectro<br>(pptv) | T+LOS<br>(pptv) | noise<br>(pptv) | random<br>(pptv) | syst<br>(pptv) | total<br>(pptv) |
|------------------|-----------------------|------------------|---------------|-----------------|------------------|----------------|-------------------|-----------------|-----------------|------------------|----------------|-----------------|
| 17               | 141.63                | 1.57             | 1.01          | 0.46            | 2.67             | 1.45           | 7.19              | 0.72            | 10.74           | 11.29            | 7.28           | 13.43           |
| 20               | 130.15                | 1.34             | 0.96          | 0.44            | 1.06             | 1.40           | 6.57              | 0.62            | 7.29            | 7.60             | 6.71           | 10.14           |
| 23               | 115.01                | 0.97             | 0.95          | 0.43            | 1.21             | 1.31           | 5.94              | 0.55            | 8.42            | 8.61             | 6.13           | 10.57           |
| 26               | 97.32                 | 0.76             | 1.04          | 0.46            | 1.98             | 1.18           | 5.02              | 0.44            | 9.47            | 9.75             | 5.22           | 11.05           |
| 29               | 78.15                 | 0.66             | 1.13          | 0.55            | 3.79             | 1.08           | 3.93              | 0.40            | 10.71           | 11.42            | 4.17           | 12.16           |
| 32               | 63.12                 | 0.73             | 1.13          | 0.68            | 5.87             | 1.02           | 3.02              | 0.44            | 12.62           | 13.98            | 3.31           | 14.36           |
| 35               | 53.57                 | 0.86             | 1.08          | 0.79            | 7.70             | 1.00           | 2.43              | 0.52            | 14.57           | 16.54            | 2.75           | 16.77           |
| 38               | 48.19                 | 0.95             | 1.04          | 0.87            | 9.14             | 1.01           | 2.08              | 0.60            | 16.11           | 18.59            | 2.43           | 18.75           |
| 41               | 45.02                 | 1.03             | 1.08          | 1.01            | 9.93             | 1.04           | 1.83              | 0.67            | 16.86           | 19.64            | 2.24           | 19.77           |
| 44               | 43.02                 | 1.05             | 1.03          | 1.01            | 10.70            | 1.04           | 1.74              | 0.71            | 17.55           | 20.64            | 2.15           | 20.75           |
| 46               | 41.31                 | 1.06             | 1.00          | 0.98            | 11.38            | 1.04           | 1.68              | 0.74            | 18.05           | 21.41            | 2.09           | 21.51           |

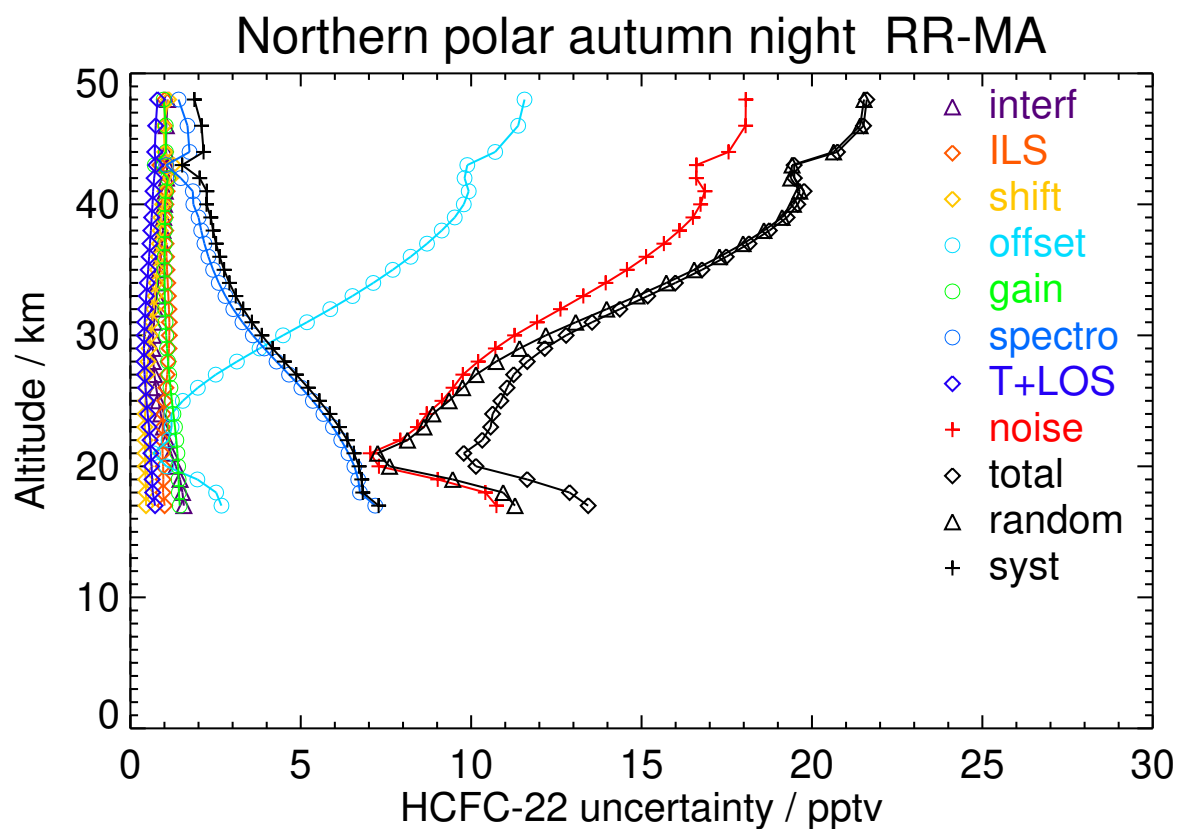

**Figure S76.** V8R\_F-22\_561 Northern polar autumn night

**Table S78.** HCFC-22 error budget for Northern midlatitude winter day. All uncertainties are  $1\sigma$ .

| altitude<br>(km) | mean target<br>(pptv) | interf<br>(pptv) | ILS<br>(pptv) | shift<br>(pptv) | offset<br>(pptv) | gain<br>(pptv) | spectro<br>(pptv) | T+LOS<br>(pptv) | noise<br>(pptv) | random<br>(pptv) | syst<br>(pptv) | total<br>(pptv) |
|------------------|-----------------------|------------------|---------------|-----------------|------------------|----------------|-------------------|-----------------|-----------------|------------------|----------------|-----------------|
| 17               | 161.05                | 1.72             | 1.14          | 0.39            | 1.14             | 2.11           | 8.84              | 0.85            | 6.00            | 6.55             | 9.06           | 11.18           |
| 20               | 136.50                | 1.17             | 0.88          | 0.50            | 1.23             | 1.83           | 7.72              | 0.71            | 7.31            | 7.62             | 7.92           | 10.99           |
| 23               | 118.37                | 0.95             | 0.88          | 0.57            | 0.94             | 1.40           | 5.99              | 0.46            | 8.13            | 8.34             | 6.12           | 10.35           |
| 26               | 111.24                | 0.72             | 1.05          | 0.67            | 1.44             | 1.18           | 4.82              | 0.34            | 8.88            | 9.11             | 4.98           | 10.38           |
| 29               | 104.02                | 0.61             | 1.16          | 0.80            | 2.81             | 1.01           | 4.14              | 0.33            | 9.62            | 10.11            | 4.34           | 11.00           |
| 32               | 95.10                 | 0.68             | 1.12          | 0.96            | 4.71             | 0.92           | 3.65              | 0.37            | 10.98           | 12.03            | 3.85           | 12.63           |
| 35               | 88.01                 | 0.81             | 1.08          | 1.10            | 6.59             | 0.91           | 3.29              | 0.44            | 12.79           | 14.48            | 3.49           | 14.90           |
| 38               | 83.45                 | 0.92             | 1.06          | 1.20            | 8.19             | 0.93           | 3.02              | 0.51            | 14.50           | 16.75            | 3.24           | 17.06           |
| 41               | 80.53                 | 0.98             | 1.06          | 1.25            | 9.36             | 0.95           | 2.85              | 0.57            | 15.73           | 18.40            | 3.08           | 18.65           |
| 44               | 78.34                 | 1.01             | 1.07          | 1.28            | 10.15            | 0.96           | 2.72              | 0.61            | 16.43           | 19.41            | 2.97           | 19.63           |
| 46               | 75.83                 | 1.03             | 1.08          | 1.29            | 10.85            | 0.96           | 2.60              | 0.65            | 16.97           | 20.24            | 2.86           | 20.44           |
| 50               | 71.66                 | 1.11             | 1.32          | 1.52            | 11.55            | 0.82           | 2.28              | 0.79            | 17.33           | 20.93            | 2.69           | 21.10           |

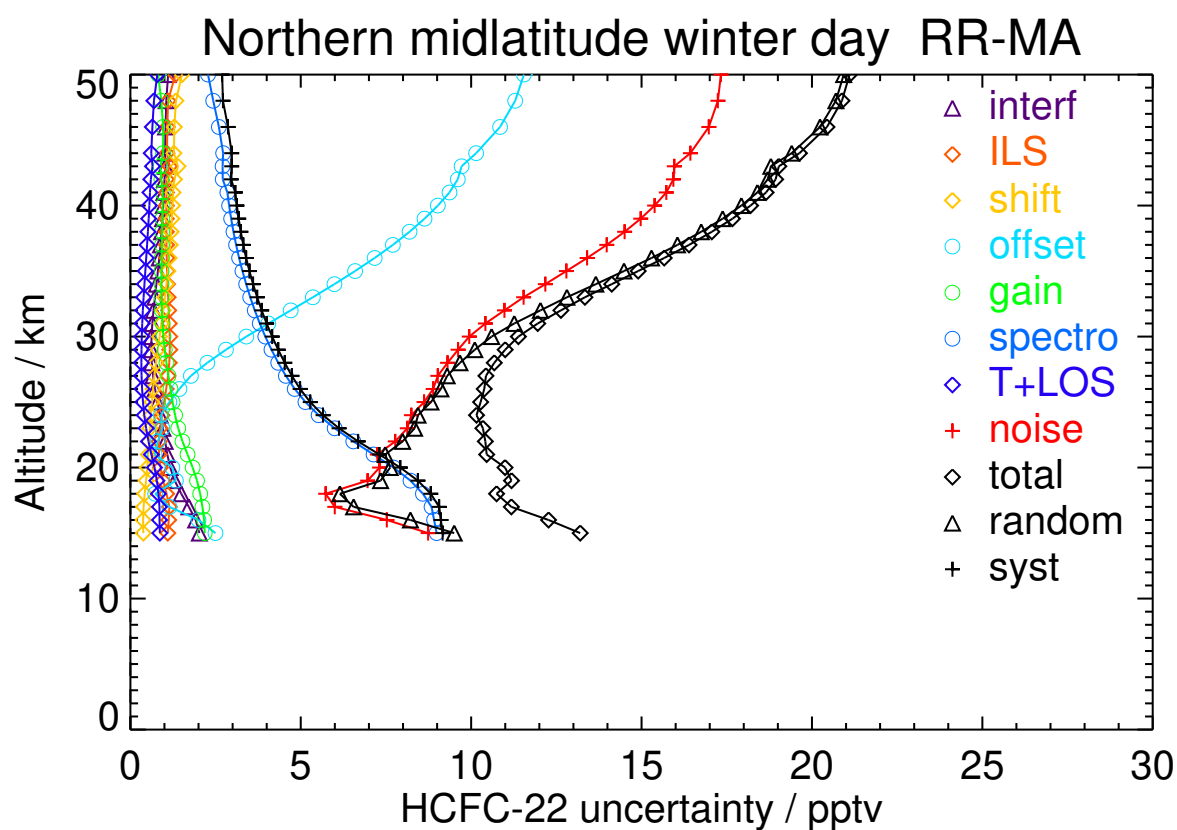

**Figure S77.** V8R\_F-22\_561 Northern midlatitude winter day

**Table S79.** HCFC-22 error budget for Northern midlatitude winter night. All uncertainties are  $1\sigma$ .

| altitude<br>(km) | mean target<br>(pptv) | interf<br>(pptv) | ILS<br>(pptv) | shift<br>(pptv) | offset<br>(pptv) | gain<br>(pptv) | spectro<br>(pptv) | T+LOS<br>(pptv) | noise<br>(pptv) | random<br>(pptv) | syst<br>(pptv) | total<br>(pptv) |
|------------------|-----------------------|------------------|---------------|-----------------|------------------|----------------|-------------------|-----------------|-----------------|------------------|----------------|-----------------|
| 17               | 142.80                | 1.70             | 1.18          | 0.43            | 2.03             | 1.72           | 7.40              | 0.72            | 8.22            | 8.86             | 7.48           | 11.59           |
| 20               | 131.13                | 1.23             | 1.01          | 0.53            | 1.15             | 1.59           | 6.70              | 0.60            | 7.10            | 7.50             | 6.78           | 10.11           |
| 23               | 120.57                | 0.95             | 0.99          | 0.62            | 0.91             | 1.43           | 5.66              | 0.43            | 8.10            | 8.33             | 5.80           | 10.15           |
| 26               | 116.59                | 0.74             | 1.17          | 0.71            | 1.43             | 1.20           | 4.97              | 0.35            | 8.89            | 9.12             | 5.16           | 10.48           |
| 29               | 107.72                | 0.63             | 1.36          | 0.85            | 2.80             | 1.08           | 4.35              | 0.34            | 9.66            | 10.15            | 4.62           | 11.15           |
| 32               | 96.14                 | 0.69             | 1.38          | 1.02            | 4.68             | 1.03           | 3.71              | 0.38            | 10.96           | 12.00            | 4.04           | 12.66           |
| 35               | 87.81                 | 0.82             | 1.35          | 1.19            | 6.53             | 1.04           | 3.22              | 0.46            | 12.72           | 14.39            | 3.58           | 14.83           |
| 38               | 82.64                 | 0.94             | 1.32          | 1.31            | 8.11             | 1.07           | 2.89              | 0.54            | 14.41           | 16.63            | 3.29           | 16.96           |
| 41               | 79.29                 | 1.01             | 1.32          | 1.39            | 9.24             | 1.08           | 2.69              | 0.60            | 15.61           | 18.25            | 3.11           | 18.51           |
| 44               | 76.70                 | 1.04             | 1.32          | 1.41            | 10.07            | 1.10           | 2.57              | 0.65            | 16.39           | 19.35            | 3.02           | 19.58           |
| 46               | 74.03                 | 1.06             | 1.32          | 1.42            | 10.79            | 1.10           | 2.46              | 0.68            | 16.97           | 20.21            | 2.93           | 20.42           |
| 50               | 67.86                 | 1.10             | 1.44          | 1.61            | 11.30            | 1.01           | 2.22              | 0.77            | 17.14           | 20.64            | 2.78           | 20.83           |

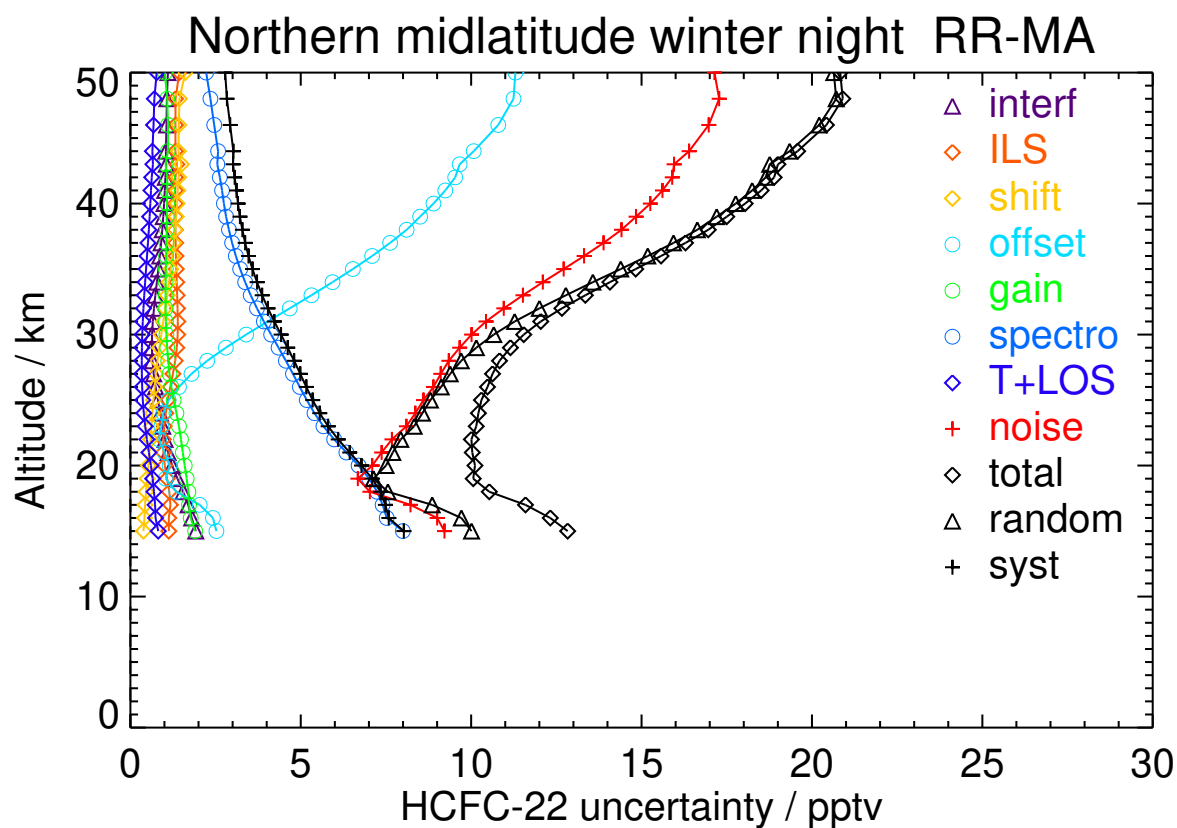

**Figure S78.** V8R\_F-22\_561 Northern midlatitude winter night

**Table S80.** HCFC-22 error budget for Northern midlatitude spring day. All uncertainties are  $1\sigma$ .

| altitude<br>(km) | mean target<br>(pptv) | interf<br>(pptv) | ILS<br>(pptv) | shift<br>(pptv) | offset<br>(pptv) | gain<br>(pptv) | spectro<br>(pptv) | T+LOS<br>(pptv) | noise<br>(pptv) | random<br>(pptv) | syst<br>(pptv) | total<br>(pptv) |
|------------------|-----------------------|------------------|---------------|-----------------|------------------|----------------|-------------------|-----------------|-----------------|------------------|----------------|-----------------|
| 17               | 148.19                | 1.71             | 1.31          | 0.44            | 2.60             | 1.61           | 7.44              | 0.80            | 10.68           | 11.25            | 7.61           | 13.58           |
| 20               | 140.51                | 1.42             | 1.23          | 0.48            | 0.75             | 1.59           | 7.09              | 0.72            | 6.71            | 7.04             | 7.29           | 10.13           |
| 23               | 128.03                | 1.00             | 1.09          | 0.58            | 0.97             | 1.47           | 6.24              | 0.56            | 8.10            | 8.32             | 6.42           | 10.51           |
| 26               | 119.93                | 0.75             | 1.21          | 0.73            | 1.21             | 1.15           | 5.31              | 0.43            | 8.89            | 9.08             | 5.51           | 10.62           |
| 29               | 109.74                | 0.63             | 1.46          | 0.95            | 2.28             | 0.96           | 4.46              | 0.39            | 9.39            | 9.76             | 4.74           | 10.85           |
| 32               | 98.32                 | 0.69             | 1.55          | 1.20            | 3.86             | 0.87           | 3.77              | 0.44            | 10.27           | 11.09            | 4.11           | 11.83           |
| 35               | 88.98                 | 0.84             | 1.51          | 1.43            | 5.56             | 0.84           | 3.26              | 0.53            | 11.73           | 13.12            | 3.62           | 13.61           |
| 38               | 83.12                 | 0.98             | 1.45          | 1.60            | 7.11             | 0.84           | 2.93              | 0.64            | 13.39           | 15.31            | 3.28           | 15.66           |
| 41               | 79.30                 | 1.07             | 1.43          | 1.70            | 8.33             | 0.83           | 2.73              | 0.72            | 14.75           | 17.09            | 3.08           | 17.37           |
| 44               | 76.38                 | 1.12             | 1.43          | 1.75            | 9.20             | 0.83           | 2.61              | 0.77            | 15.62           | 18.28            | 2.97           | 18.52           |
| 46               | 72.93                 | 1.15             | 1.43          | 1.77            | 10.02            | 0.82           | 2.49              | 0.82            | 16.37           | 19.34            | 2.86           | 19.56           |
| 50               | 67.63                 | 1.16             | 1.42          | 1.75            | 10.99            | 0.80           | 2.32              | 0.86            | 17.14           | 20.51            | 2.71           | 20.68           |

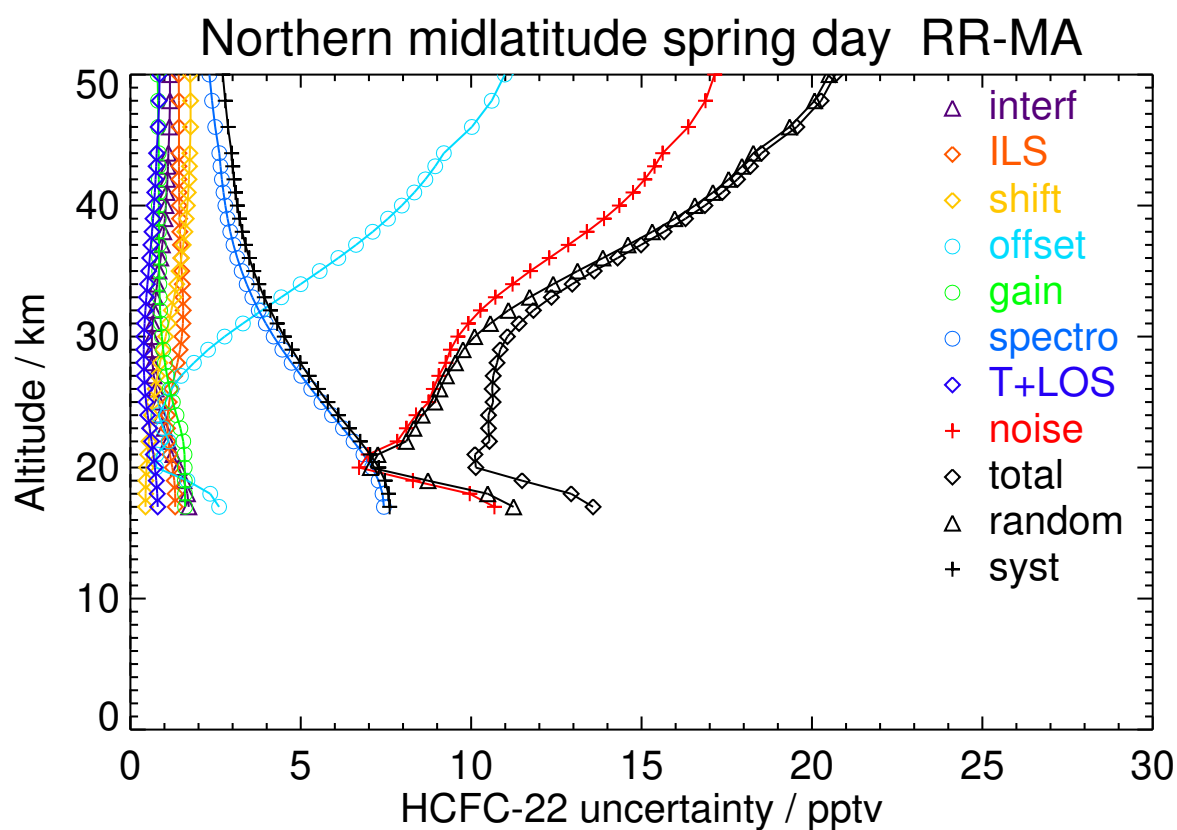

**Figure S79.** V8R\_F-22\_561 Northern midlatitude spring day

**Table S81.** HCFC-22 error budget for Northern midlatitude spring night. All uncertainties are  $1\sigma$ .

| altitude<br>(km) | mean target<br>(pptv) | interf<br>(pptv) | ILS<br>(pptv) | shift<br>(pptv) | offset<br>(pptv) | gain<br>(pptv) | spectro<br>(pptv) | T+LOS<br>(pptv) | noise<br>(pptv) | random<br>(pptv) | syst<br>(pptv) | total<br>(pptv) |
|------------------|-----------------------|------------------|---------------|-----------------|------------------|----------------|-------------------|-----------------|-----------------|------------------|----------------|-----------------|
| 17               | 151.35                | 1.67             | 1.31          | 0.44            | 2.59             | 1.59           | 7.83              | 0.84            | 10.50           | 11.07            | 7.97           | 13.64           |
| 20               | 142.37                | 1.38             | 1.23          | 0.48            | 0.76             | 1.54           | 7.46              | 0.76            | 6.67            | 7.02             | 7.61           | 10.35           |
| 23               | 125.04                | 1.00             | 1.08          | 0.56            | 0.98             | 1.40           | 6.38              | 0.58            | 8.13            | 8.35             | 6.54           | 10.61           |
| 26               | 115.84                | 0.76             | 1.17          | 0.69            | 1.30             | 1.12           | 5.24              | 0.43            | 8.99            | 9.18             | 5.43           | 10.67           |
| 29               | 105.41                | 0.63             | 1.34          | 0.90            | 2.47             | 0.91           | 4.27              | 0.39            | 9.58            | 9.98             | 4.53           | 10.95           |
| 32               | 94.11                 | 0.69             | 1.38          | 1.15            | 4.09             | 0.82           | 3.52              | 0.45            | 10.55           | 11.42            | 3.82           | 12.05           |
| 35               | 86.35                 | 0.84             | 1.29          | 1.38            | 5.79             | 0.79           | 3.03              | 0.56            | 12.07           | 13.51            | 3.33           | 13.92           |
| 38               | 81.51                 | 0.98             | 1.22          | 1.55            | 7.32             | 0.79           | 2.74              | 0.67            | 13.71           | 15.68            | 3.02           | 15.97           |
| 41               | 78.70                 | 1.07             | 1.18          | 1.65            | 8.52             | 0.79           | 2.58              | 0.76            | 15.03           | 17.42            | 2.86           | 17.65           |
| 44               | 76.82                 | 1.12             | 1.17          | 1.70            | 9.37             | 0.79           | 2.48              | 0.82            | 15.87           | 18.57            | 2.76           | 18.78           |
| 46               | 74.70                 | 1.16             | 1.17          | 1.73            | 10.17            | 0.78           | 2.39              | 0.87            | 16.58           | 19.60            | 2.67           | 19.78           |
| 50               | 71.39                 | 1.18             | 1.18          | 1.73            | 11.09            | 0.75           | 2.25              | 0.92            | 17.28           | 20.67            | 2.56           | 20.83           |

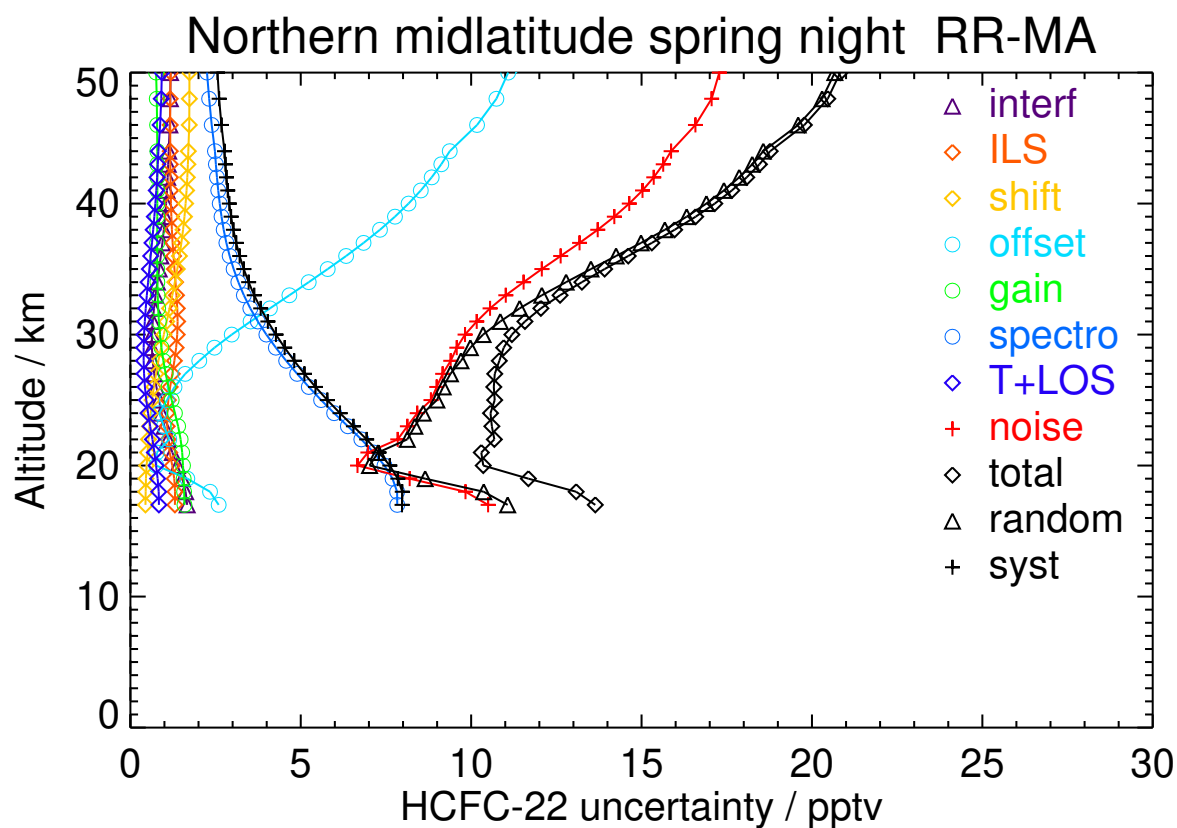

**Figure S80.** V8R\_F-22\_561 Northern midlatitude spring night

**Table S82.** HCFC-22 error budget for Northern midlatitude summer day. All uncertainties are  $1\sigma$ .

| altitude<br>(km) | mean target<br>(pptv) | interf<br>(pptv) | ILS<br>(pptv) | shift<br>(pptv) | offset<br>(pptv) | gain<br>(pptv) | spectro<br>(pptv) | T+LOS<br>(pptv) | noise<br>(pptv) | random<br>(pptv) | syst<br>(pptv) | total<br>(pptv) |
|------------------|-----------------------|------------------|---------------|-----------------|------------------|----------------|-------------------|-----------------|-----------------|------------------|----------------|-----------------|
| 17               | 157.96                | 1.77             | 1.21          | 0.44            | 2.40             | 1.90           | 8.03              | 0.87            | 10.24           | 10.76            | 8.27           | 13.57           |
| 20               | 149.09                | 1.46             | 1.16          | 0.47            | 0.65             | 1.78           | 7.68              | 0.77            | 6.30            | 6.62             | 7.92           | 10.32           |
| 23               | 130.37                | 1.02             | 1.04          | 0.58            | 0.85             | 1.46           | 6.67              | 0.60            | 7.83            | 8.01             | 6.87           | 10.55           |
| 26               | 115.55                | 0.76             | 1.20          | 0.73            | 0.89             | 1.12           | 5.39              | 0.45            | 8.52            | 8.66             | 5.60           | 10.32           |
| 29               | 103.72                | 0.61             | 1.44          | 0.96            | 1.68             | 0.87           | 4.28              | 0.41            | 8.98            | 9.23             | 4.57           | 10.30           |
| 32               | 92.77                 | 0.66             | 1.53          | 1.24            | 3.02             | 0.75           | 3.46              | 0.45            | 9.60            | 10.18            | 3.83           | 10.87           |
| 35               | 84.27                 | 0.81             | 1.48          | 1.50            | 4.61             | 0.70           | 2.91              | 0.54            | 10.78           | 11.87            | 3.30           | 12.32           |
| 38               | 77.73                 | 0.96             | 1.45          | 1.70            | 6.15             | 0.69           | 2.57              | 0.66            | 12.37           | 13.97            | 2.99           | 14.29           |
| 41               | 72.85                 | 1.07             | 1.45          | 1.83            | 7.44             | 0.68           | 2.38              | 0.75            | 13.80           | 15.84            | 2.82           | 16.09           |
| 44               | 69.36                 | 1.13             | 1.47          | 1.90            | 8.40             | 0.67           | 2.27              | 0.82            | 14.79           | 17.18            | 2.73           | 17.40           |
| 46               | 65.88                 | 1.19             | 1.50          | 1.94            | 9.35             | 0.65           | 2.17              | 0.89            | 15.74           | 18.48            | 2.66           | 18.67           |
| 50               | 61.18                 | 1.23             | 1.53          | 1.95            | 10.55            | 0.62           | 2.03              | 0.95            | 16.89           | 20.08            | 2.56           | 20.24           |

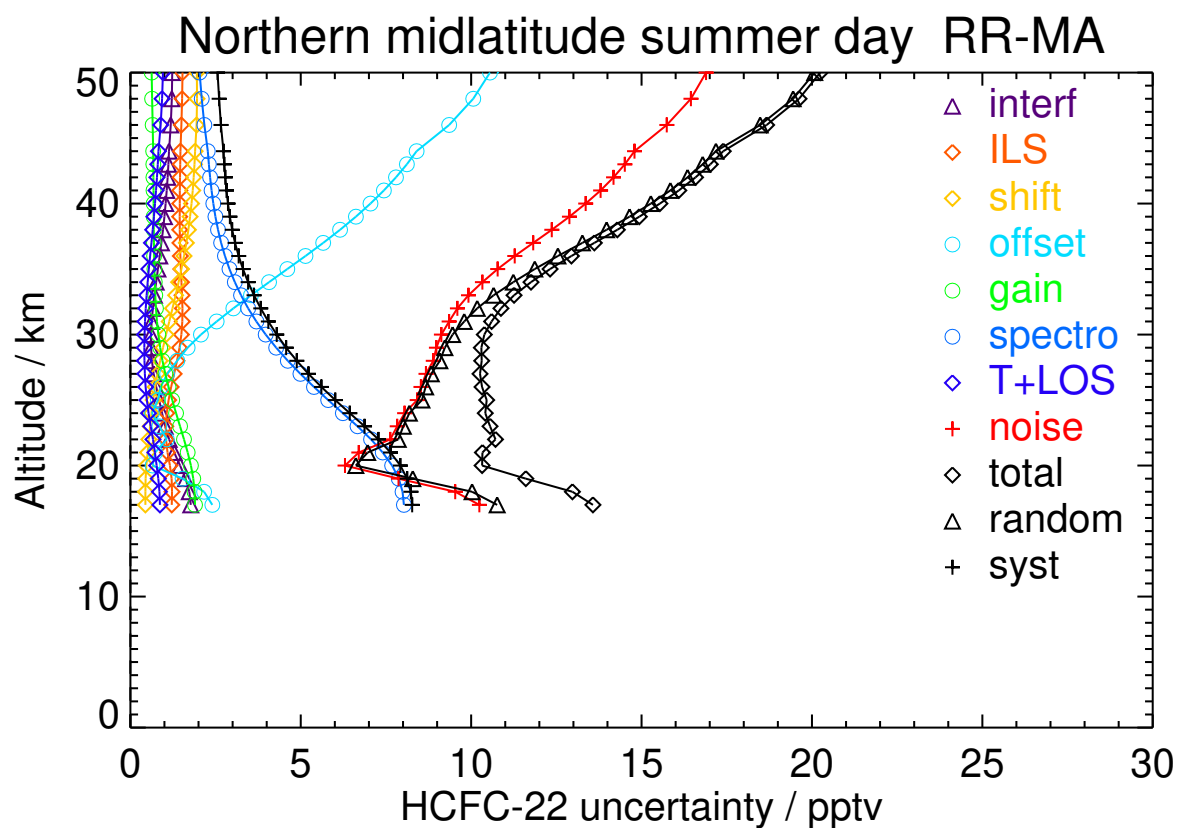

**Figure S81.** V8R\_F-22\_561 Northern midlatitude summer day

**Table S83.** HCFC-22 error budget for Northern midlatitude summer night. All uncertainties are  $1\sigma$ .

| altitude<br>(km) | mean target<br>(pptv) | interf<br>(pptv) | ILS<br>(pptv) | shift<br>(pptv) | offset<br>(pptv) | gain<br>(pptv) | spectro<br>(pptv) | T+LOS<br>(pptv) | noise<br>(pptv) | random<br>(pptv) | syst<br>(pptv) | total<br>(pptv) |
|------------------|-----------------------|------------------|---------------|-----------------|------------------|----------------|-------------------|-----------------|-----------------|------------------|----------------|-----------------|
| 17               | 157.83                | 1.70             | 1.26          | 0.43            | 2.38             | 1.81           | 8.07              | 0.86            | 10.15           | 10.67            | 8.28           | 13.51           |
| 20               | 147.47                | 1.41             | 1.20          | 0.46            | 0.68             | 1.67           | 7.67              | 0.78            | 6.29            | 6.61             | 7.88           | 10.28           |
| 23               | 127.24                | 1.02             | 1.02          | 0.57            | 0.88             | 1.33           | 6.55              | 0.60            | 7.81            | 7.99             | 6.74           | 10.45           |
| 26               | 113.69                | 0.76             | 1.16          | 0.72            | 0.88             | 0.98           | 5.28              | 0.45            | 8.52            | 8.65             | 5.48           | 10.24           |
| 29               | 101.64                | 0.60             | 1.40          | 0.96            | 1.62             | 0.71           | 4.20              | 0.43            | 8.96            | 9.20             | 4.46           | 10.22           |
| 32               | 90.48                 | 0.66             | 1.45          | 1.26            | 2.91             | 0.56           | 3.35              | 0.48            | 9.52            | 10.08            | 3.67           | 10.72           |
| 35               | 82.49                 | 0.81             | 1.35          | 1.55            | 4.47             | 0.51           | 2.81              | 0.59            | 10.61           | 11.67            | 3.12           | 12.08           |
| 38               | 76.98                 | 0.97             | 1.27          | 1.77            | 6.01             | 0.49           | 2.51              | 0.73            | 12.16           | 13.74            | 2.80           | 14.03           |
| 41               | 72.93                 | 1.08             | 1.24          | 1.92            | 7.30             | 0.48           | 2.35              | 0.84            | 13.59           | 15.62            | 2.63           | 15.84           |
| 44               | 69.97                 | 1.16             | 1.23          | 2.00            | 8.27             | 0.47           | 2.26              | 0.93            | 14.61           | 16.99            | 2.54           | 17.18           |
| 46               | 66.83                 | 1.21             | 1.25          | 2.05            | 9.25             | 0.45           | 2.17              | 1.00            | 15.61           | 18.33            | 2.46           | 18.50           |
| 50               | 61.89                 | 1.26             | 1.27          | 2.06            | 10.48            | 0.43           | 2.04              | 1.08            | 16.83           | 20.01            | 2.35           | 20.15           |

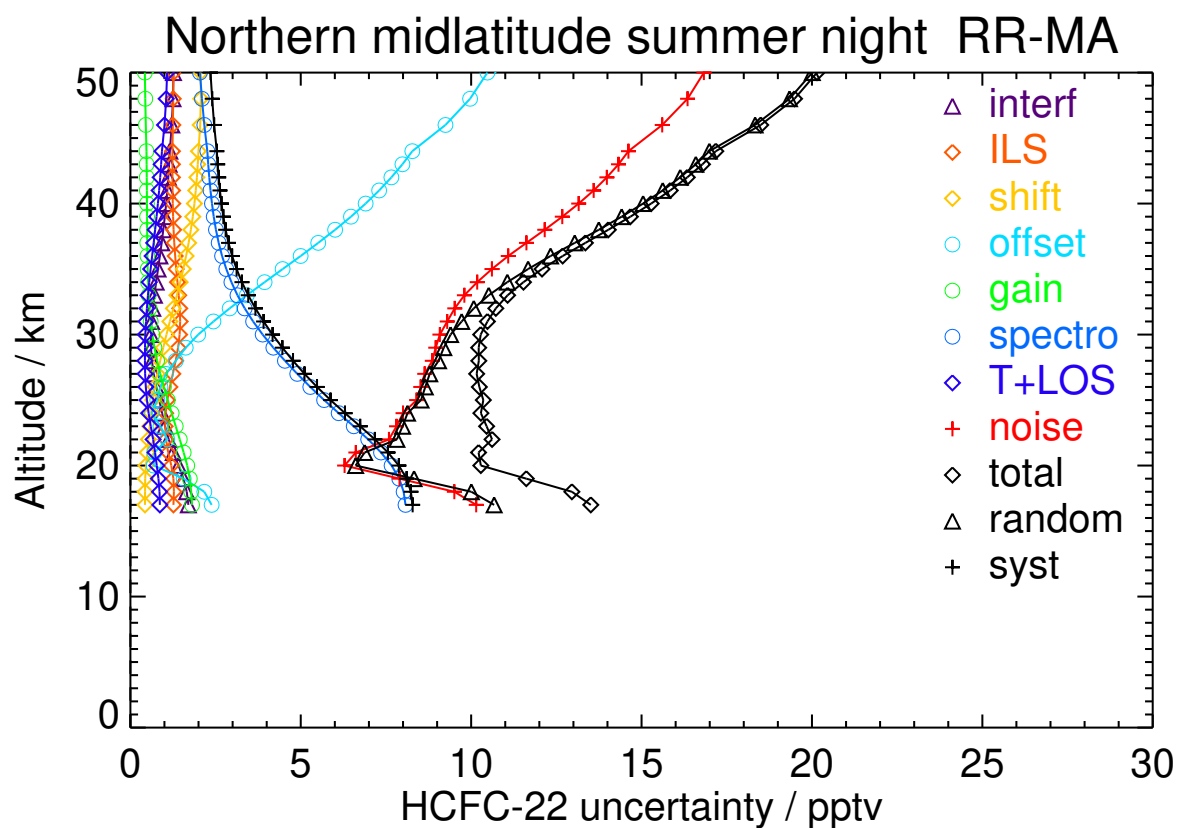

**Figure S82.** V8R\_F-22\_561 Northern midlatitude summer night

**Table S84.** HCFC-22 error budget for Northern midlatitude autumn day. All uncertainties are  $1\sigma$ .

| altitude<br>(km) | mean target<br>(pptv) | interf<br>(pptv) | ILS<br>(pptv) | shift<br>(pptv) | offset<br>(pptv) | gain<br>(pptv) | spectro<br>(pptv) | T+LOS<br>(pptv) | noise<br>(pptv) | random<br>(pptv) | syst<br>(pptv) | total<br>(pptv) |
|------------------|-----------------------|------------------|---------------|-----------------|------------------|----------------|-------------------|-----------------|-----------------|------------------|----------------|-----------------|
| 17               | 160.79                | 1.69             | 1.37          | 0.43            | 2.67             | 1.95           | 8.38              | 0.87            | 10.47           | 11.08            | 8.58           | 14.01           |
| 20               | 150.10                | 1.41             | 1.34          | 0.46            | 1.00             | 1.77           | 7.80              | 0.79            | 6.94            | 7.34             | 7.99           | 10.86           |
| 23               | 132.60                | 1.00             | 1.20          | 0.53            | 1.05             | 1.59           | 6.90              | 0.64            | 8.14            | 8.39             | 7.09           | 10.98           |
| 26               | 117.44                | 0.75             | 1.20          | 0.64            | 1.33             | 1.24           | 5.70              | 0.46            | 8.97            | 9.16             | 5.90           | 10.90           |
| 29               | 107.27                | 0.62             | 1.31          | 0.81            | 2.56             | 1.03           | 4.65              | 0.38            | 9.58            | 10.00            | 4.90           | 11.13           |
| 32               | 99.52                 | 0.69             | 1.36          | 1.01            | 4.27             | 0.94           | 3.93              | 0.40            | 10.70           | 11.61            | 4.22           | 12.36           |
| 35               | 93.26                 | 0.83             | 1.33          | 1.19            | 6.02             | 0.92           | 3.47              | 0.48            | 12.39           | 13.88            | 3.77           | 14.38           |
| 38               | 88.39                 | 0.95             | 1.29          | 1.32            | 7.55             | 0.94           | 3.15              | 0.57            | 14.09           | 16.09            | 3.47           | 16.46           |
| 41               | 84.92                 | 1.02             | 1.27          | 1.39            | 8.70             | 0.95           | 2.95              | 0.63            | 15.36           | 17.77            | 3.27           | 18.07           |
| 44               | 82.33                 | 1.06             | 1.27          | 1.43            | 9.49             | 0.95           | 2.81              | 0.68            | 16.13           | 18.83            | 3.15           | 19.09           |
| 46               | 79.42                 | 1.08             | 1.26          | 1.44            | 10.22            | 0.95           | 2.68              | 0.72            | 16.75           | 19.73            | 3.03           | 19.96           |
| 50               | 84.26                 | 1.10             | 1.33          | 1.55            | 10.92            | 0.92           | 2.68              | 0.79            | 17.20           | 20.49            | 3.05           | 20.71           |

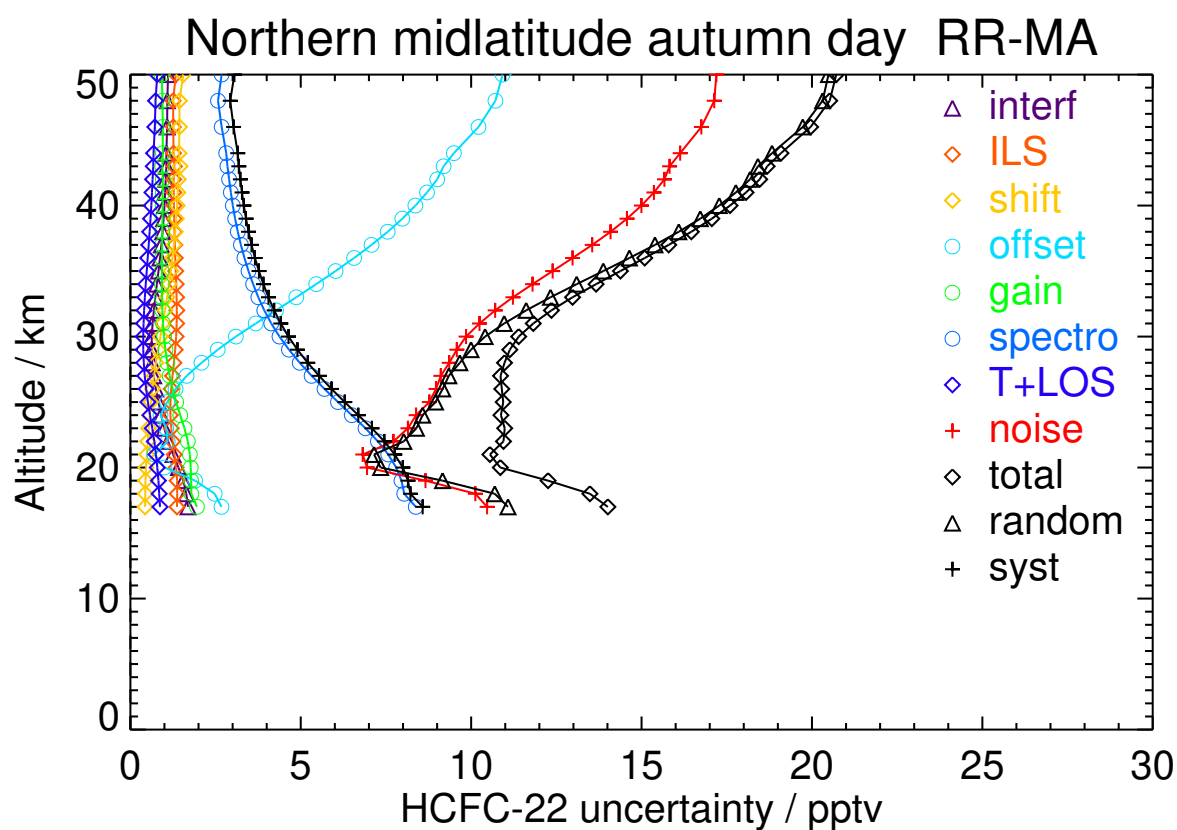

**Figure S83.** V8R\_F-22\_561 Northern midlatitude autumn day

**Table S85.** HCFC-22 error budget for Northern midlatitude autumn night. All uncertainties are  $1\sigma$ .

| altitude<br>(km) | mean target<br>(pptv) | interf<br>(pptv) | ILS<br>(pptv) | shift<br>(pptv) | offset<br>(pptv) | gain<br>(pptv) | spectro<br>(pptv) | T+LOS<br>(pptv) | noise<br>(pptv) | random<br>(pptv) | syst<br>(pptv) | total<br>(pptv) |
|------------------|-----------------------|------------------|---------------|-----------------|------------------|----------------|-------------------|-----------------|-----------------|------------------|----------------|-----------------|
| 17               | 150.72                | 1.67             | 1.28          | 0.43            | 2.59             | 1.67           | 7.63              | 0.79            | 10.43           | 11.01            | 7.78           | 13.48           |
| 20               | 144.64                | 1.39             | 1.30          | 0.47            | 0.89             | 1.67           | 7.35              | 0.72            | 6.83            | 7.19             | 7.55           | 10.43           |
| 23               | 132.58                | 0.99             | 1.25          | 0.58            | 1.02             | 1.65           | 6.61              | 0.59            | 8.07            | 8.31             | 6.84           | 10.76           |
| 26               | 119.73                | 0.75             | 1.25          | 0.70            | 1.30             | 1.35           | 5.58              | 0.44            | 8.87            | 9.07             | 5.82           | 10.78           |
| 29               | 107.40                | 0.63             | 1.36          | 0.85            | 2.54             | 1.11           | 4.59              | 0.38            | 9.50            | 9.93             | 4.87           | 11.05           |
| 32               | 97.24                 | 0.69             | 1.39          | 1.02            | 4.27             | 1.00           | 3.83              | 0.40            | 10.70           | 11.61            | 4.13           | 12.33           |
| 35               | 88.46                 | 0.82             | 1.34          | 1.17            | 6.02             | 0.97           | 3.33              | 0.47            | 12.43           | 13.92            | 3.63           | 14.38           |
| 38               | 81.54                 | 0.93             | 1.30          | 1.28            | 7.55             | 0.97           | 2.99              | 0.55            | 14.14           | 16.14            | 3.30           | 16.47           |
| 41               | 76.79                 | 1.00             | 1.28          | 1.35            | 8.69             | 0.99           | 2.78              | 0.61            | 15.42           | 17.81            | 3.10           | 18.08           |
| 44               | 73.46                 | 1.04             | 1.27          | 1.38            | 9.47             | 0.99           | 2.64              | 0.65            | 16.18           | 18.86            | 2.97           | 19.09           |
| 46               | 70.00                 | 1.06             | 1.26          | 1.39            | 10.18            | 0.99           | 2.51              | 0.69            | 16.78           | 19.73            | 2.86           | 19.94           |
| 50               | 74.25                 | 1.08             | 1.33          | 1.50            | 10.94            | 0.96           | 2.54              | 0.77            | 17.26           | 20.54            | 2.94           | 20.75           |

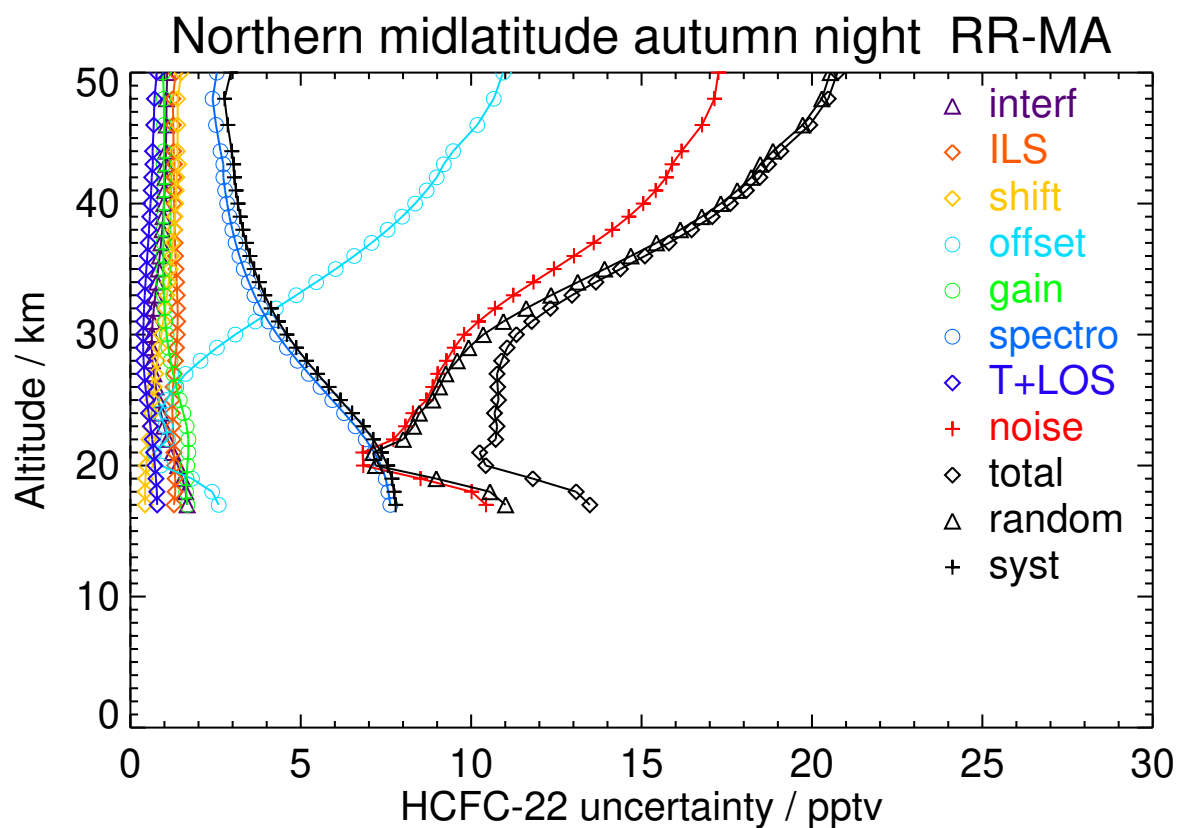

**Figure S84.** V8R\_F-22\_561 Northern midlatitude autumn night

**Table S86.** HCFC-22 error budget for Tropics day. All uncertainties are  $1\sigma$ .

| altitude<br>(km) | mean target<br>(pptv) | interf<br>(pptv) | ILS<br>(pptv) | shift<br>(pptv) | offset<br>(pptv) | gain<br>(pptv) | spectro<br>(pptv) | T+LOS<br>(pptv) | noise<br>(pptv) | random<br>(pptv) | syst<br>(pptv) | total<br>(pptv) |
|------------------|-----------------------|------------------|---------------|-----------------|------------------|----------------|-------------------|-----------------|-----------------|------------------|----------------|-----------------|
| 17               | 178.66                | 2.36             | 2.49          | 0.26            | 2.91             | 1.91           | 9.28              | 1.45            | 12.22           | 12.93            | 9.71           | 16.17           |
| 20               | 172.86                | 1.85             | 2.37          | 0.31            | 1.12             | 1.78           | 9.08              | 1.22            | 8.23            | 8.66             | 9.49           | 12.85           |
| 23               | 158.38                | 1.06             | 2.10          | 0.50            | 0.90             | 1.52           | 8.18              | 0.90            | 8.07            | 8.30             | 8.54           | 11.90           |
| 26               | 151.77                | 0.73             | 2.07          | 0.77            | 1.11             | 1.33           | 7.00              | 0.64            | 8.80            | 8.99             | 7.37           | 11.63           |
| 29               | 144.74                | 0.61             | 2.19          | 1.07            | 2.08             | 1.15           | 6.02              | 0.52            | 9.23            | 9.58             | 6.46           | 11.56           |
| 32               | 133.19                | 0.69             | 2.18          | 1.35            | 3.56             | 1.06           | 5.21              | 0.53            | 9.96            | 10.72            | 5.70           | 12.14           |
| 35               | 122.28                | 0.84             | 2.04          | 1.58            | 5.22             | 1.02           | 4.58              | 0.61            | 11.31           | 12.62            | 5.08           | 13.60           |
| 38               | 112.89                | 0.99             | 1.93          | 1.75            | 6.78             | 1.01           | 4.13              | 0.70            | 12.96           | 14.79            | 4.62           | 15.50           |
| 41               | 105.55                | 1.08             | 1.87          | 1.85            | 8.02             | 0.99           | 3.83              | 0.79            | 14.37           | 16.63            | 4.33           | 17.18           |
| 44               | 100.30                | 1.14             | 1.85          | 1.90            | 8.92             | 0.98           | 3.63              | 0.84            | 15.29           | 17.87            | 4.15           | 18.35           |
| 46               | 95.09                 | 1.17             | 1.84          | 1.92            | 9.79             | 0.96           | 3.44              | 0.89            | 16.11           | 19.01            | 3.97           | 19.42           |
| 50               | 87.42                 | 1.19             | 1.82          | 1.90            | 10.82            | 0.92           | 3.16              | 0.93            | 17.00           | 20.30            | 3.72           | 20.64           |

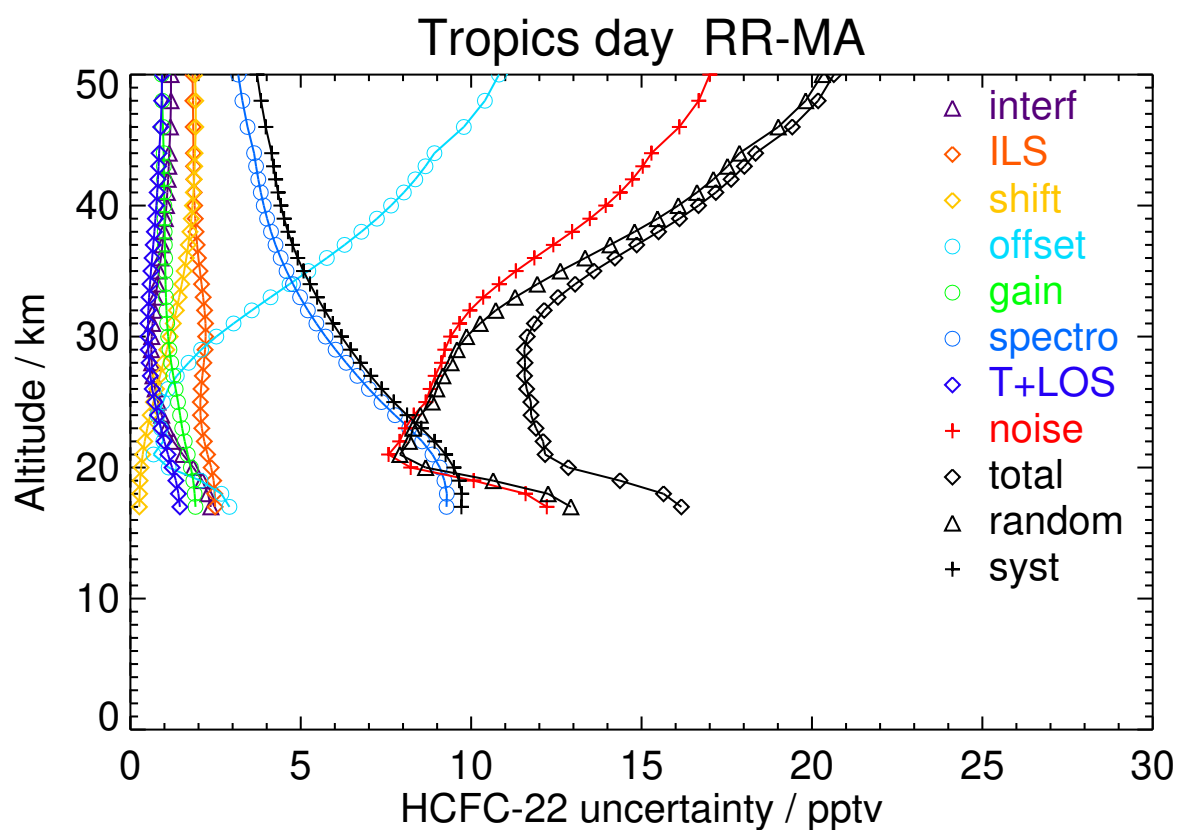

**Figure S85.** V8R\_F-22\_561 Tropics day

**Table S87.** HCFC-22 error budget for Tropics night. All uncertainties are  $1\sigma$ .

| altitude<br>(km) | mean target<br>(pptv) | interf<br>(pptv) | ILS<br>(pptv) | shift<br>(pptv) | offset<br>(pptv) | gain<br>(pptv) | spectro<br>(pptv) | T+LOS<br>(pptv) | noise<br>(pptv) | random<br>(pptv) | syst<br>(pptv) | total<br>(pptv) |
|------------------|-----------------------|------------------|---------------|-----------------|------------------|----------------|-------------------|-----------------|-----------------|------------------|----------------|-----------------|
| 17               | 175.06                | 2.32             | 2.37          | 0.26            | 2.91             | 1.81           | 8.92              | 1.36            | 12.14           | 12.82            | 9.34           | 15.86           |
| 20               | 168.19                | 1.84             | 2.29          | 0.31            | 1.21             | 1.73           | 8.63              | 1.16            | 8.32            | 8.75             | 9.05           | 12.58           |
| 23               | 156.09                | 1.07             | 2.05          | 0.49            | 0.93             | 1.55           | 7.85              | 0.88            | 8.12            | 8.36             | 8.20           | 11.71           |
| 26               | 149.16                | 0.73             | 2.01          | 0.77            | 1.11             | 1.29           | 6.86              | 0.65            | 8.83            | 9.04             | 7.20           | 11.55           |
| 29               | 141.14                | 0.62             | 2.11          | 1.08            | 2.08             | 1.08           | 5.89              | 0.53            | 9.24            | 9.61             | 6.29           | 11.48           |
| 32               | 130.96                | 0.70             | 2.10          | 1.36            | 3.56             | 0.99           | 5.06              | 0.53            | 10.00           | 10.76            | 5.53           | 12.10           |
| 35               | 121.81                | 0.85             | 1.99          | 1.59            | 5.23             | 0.96           | 4.45              | 0.60            | 11.35           | 12.66            | 4.93           | 13.59           |
| 38               | 114.20                | 0.99             | 1.90          | 1.76            | 6.80             | 0.96           | 4.03              | 0.70            | 13.00           | 14.84            | 4.51           | 15.51           |
| 41               | 108.44                | 1.09             | 1.86          | 1.86            | 8.05             | 0.95           | 3.76              | 0.78            | 14.40           | 16.67            | 4.25           | 17.21           |
| 44               | 104.32                | 1.15             | 1.85          | 1.91            | 8.95             | 0.94           | 3.58              | 0.84            | 15.33           | 17.92            | 4.09           | 18.38           |
| 46               | 99.99                 | 1.19             | 1.84          | 1.94            | 9.82             | 0.92           | 3.41              | 0.89            | 16.16           | 19.07            | 3.93           | 19.47           |
| 50               | 93.35                 | 1.21             | 1.82          | 1.92            | 10.85            | 0.88           | 3.15              | 0.94            | 17.06           | 20.37            | 3.70           | 20.71           |

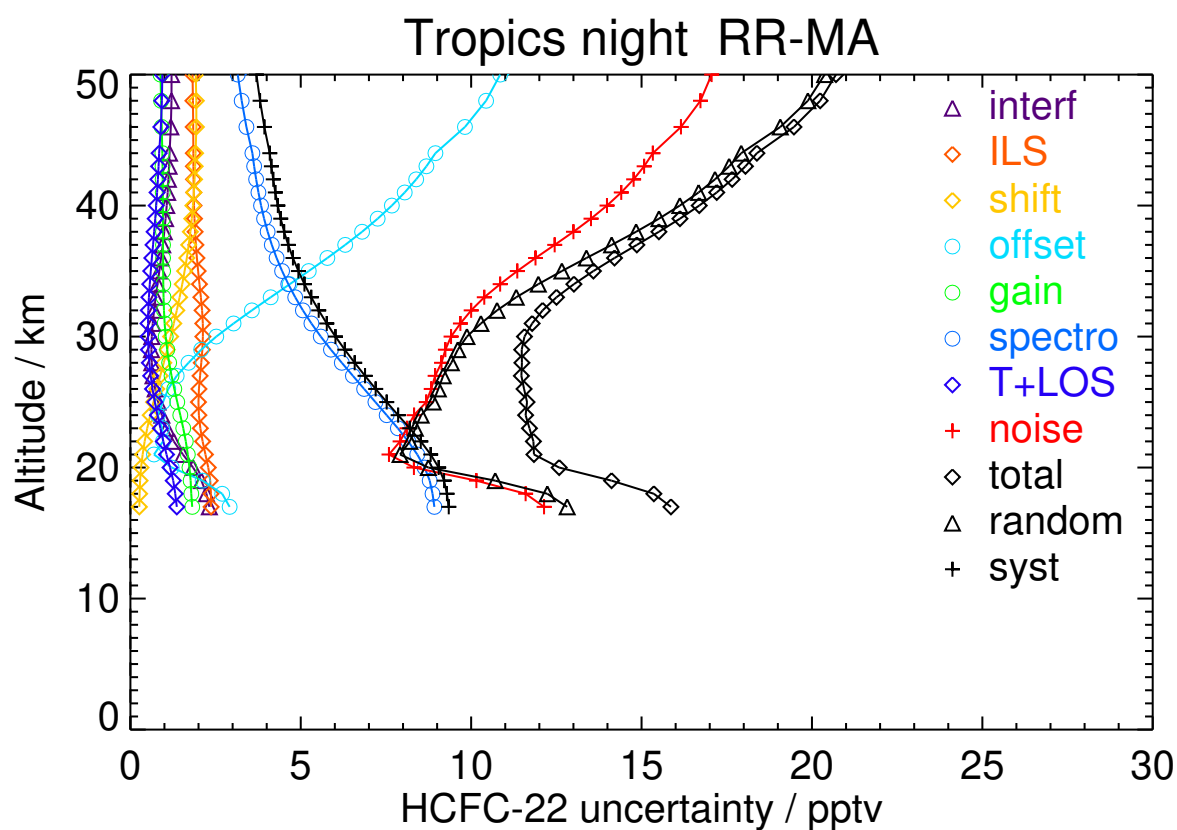

**Figure S86.** V8R\_F-22\_561 Tropics night

**Table S88.** HCFC-22 error budget for Southern midlatitude winter day. All uncertainties are  $1\sigma$ .

| altitude<br>(km) | mean target<br>(pptv) | interf<br>(pptv) | ILS<br>(pptv) | shift<br>(pptv) | offset<br>(pptv) | gain<br>(pptv) | spectro<br>(pptv) | T+LOS<br>(pptv) | noise<br>(pptv) | random<br>(pptv) | syst<br>(pptv) | total<br>(pptv) |
|------------------|-----------------------|------------------|---------------|-----------------|------------------|----------------|-------------------|-----------------|-----------------|------------------|----------------|-----------------|
| 17               | 132.34                | 2.01             | 1.25          | 0.39            | 2.83             | 1.24           | 6.71              | 0.78            | 12.69           | 13.21            | 6.89           | 14.90           |
| 20               | 140.96                | 1.45             | 1.17          | 0.52            | 1.38             | 1.70           | 6.84              | 0.68            | 8.03            | 8.39             | 7.06           | 10.97           |
| 23               | 131.14                | 1.05             | 1.09          | 0.60            | 1.15             | 1.51           | 6.10              | 0.54            | 8.32            | 8.55             | 6.31           | 10.63           |
| 26               | 125.15                | 0.79             | 1.17          | 0.70            | 1.49             | 1.31           | 5.42              | 0.41            | 9.22            | 9.44             | 5.64           | 11.00           |
| 29               | 117.14                | 0.65             | 1.37          | 0.85            | 2.84             | 1.18           | 4.81              | 0.38            | 9.91            | 10.40            | 5.07           | 11.57           |
| 32               | 106.90                | 0.72             | 1.50          | 1.04            | 4.61             | 1.11           | 4.25              | 0.44            | 11.15           | 12.17            | 4.55           | 12.99           |
| 35               | 96.57                 | 0.86             | 1.51          | 1.21            | 6.36             | 1.10           | 3.80              | 0.54            | 12.85           | 14.46            | 4.10           | 15.03           |
| 38               | 88.92                 | 0.98             | 1.49          | 1.33            | 7.86             | 1.11           | 3.45              | 0.63            | 14.50           | 16.62            | 3.77           | 17.04           |
| 41               | 83.76                 | 1.06             | 1.50          | 1.43            | 8.93             | 1.10           | 3.20              | 0.70            | 15.65           | 18.16            | 3.53           | 18.50           |
| 44               | 80.30                 | 1.09             | 1.49          | 1.46            | 9.72             | 1.11           | 3.05              | 0.74            | 16.42           | 19.21            | 3.41           | 19.51           |
| 46               | 76.86                 | 1.11             | 1.48          | 1.46            | 10.44            | 1.11           | 2.90              | 0.78            | 17.04           | 20.11            | 3.28           | 20.37           |
| 50               | 68.21                 | 1.15             | 1.65          | 1.62            | 10.95            | 1.05           | 2.62              | 0.85            | 17.31           | 20.63            | 3.10           | 20.86           |

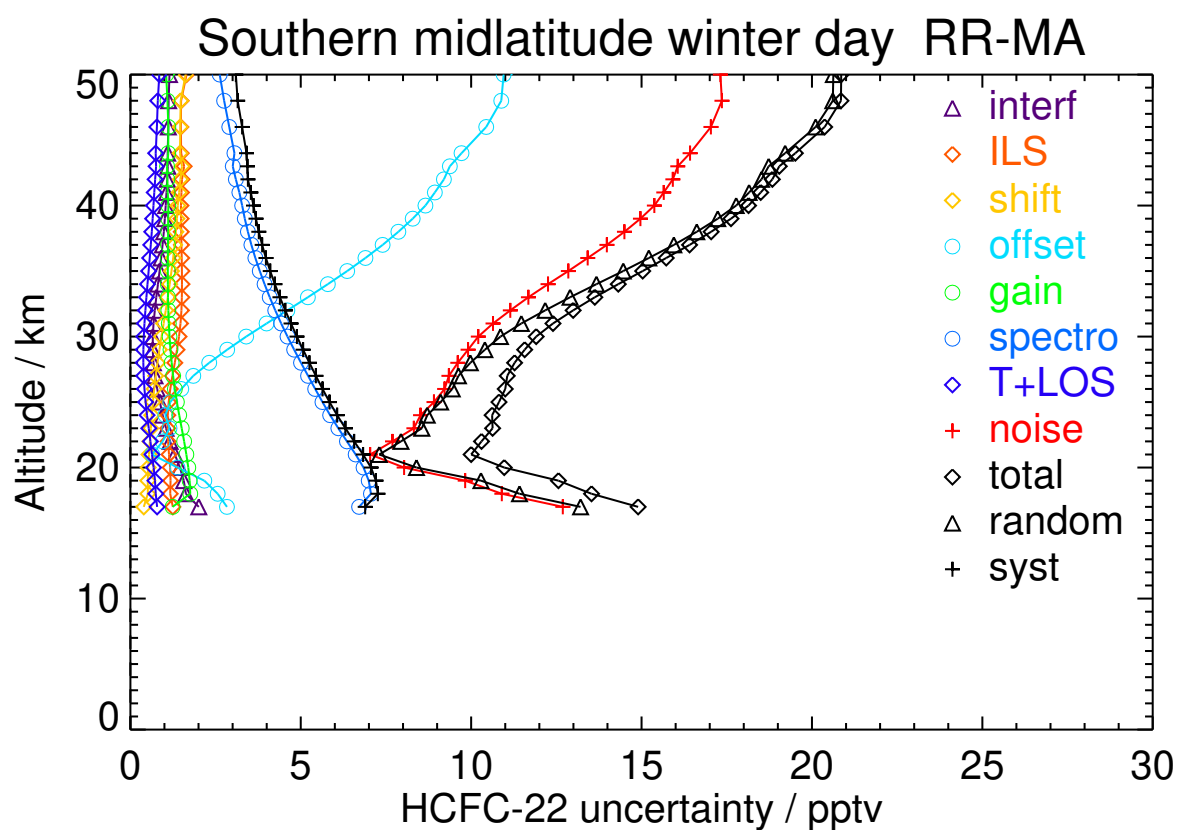

**Figure S87.** V8R\_F-22\_561 Southern midlatitude winter day

**Table S89.** HCFC-22 error budget for Southern midlatitude winter night. All uncertainties are  $1\sigma$ .

| altitude<br>(km) | mean target<br>(pptv) | interf<br>(pptv) | ILS<br>(pptv) | shift<br>(pptv) | offset<br>(pptv) | gain<br>(pptv) | spectro<br>(pptv) | T+LOS<br>(pptv) | noise<br>(pptv) | random<br>(pptv) | syst<br>(pptv) | total<br>(pptv) |
|------------------|-----------------------|------------------|---------------|-----------------|------------------|----------------|-------------------|-----------------|-----------------|------------------|----------------|-----------------|
| 17               | 144.01                | 1.58             | 1.20          | 0.44            | 2.56             | 1.35           | 6.87              | 0.75            | 11.49           | 11.92            | 7.08           | 13.86           |
| 20               | 138.52                | 1.39             | 1.28          | 0.47            | 1.34             | 1.36           | 6.72              | 0.70            | 8.31            | 8.66             | 6.86           | 11.05           |
| 23               | 127.14                | 1.01             | 1.09          | 0.52            | 1.22             | 1.17           | 6.03              | 0.58            | 8.59            | 8.82             | 6.17           | 10.76           |
| 26               | 119.06                | 0.78             | 1.16          | 0.61            | 1.96             | 1.07           | 5.35              | 0.45            | 9.66            | 9.96             | 5.51           | 11.38           |
| 29               | 109.34                | 0.68             | 1.34          | 0.78            | 3.63             | 1.03           | 4.69              | 0.40            | 10.70           | 11.40            | 4.89           | 12.40           |
| 32               | 98.79                 | 0.76             | 1.47          | 0.98            | 5.56             | 1.02           | 4.09              | 0.46            | 12.27           | 13.58            | 4.33           | 14.26           |
| 35               | 90.22                 | 0.90             | 1.51          | 1.16            | 7.34             | 1.04           | 3.62              | 0.55            | 14.05           | 15.97            | 3.88           | 16.44           |
| 38               | 83.62                 | 1.02             | 1.54          | 1.30            | 8.73             | 1.07           | 3.27              | 0.63            | 15.55           | 17.96            | 3.57           | 18.31           |
| 41               | 79.19                 | 1.10             | 1.64          | 1.50            | 9.33             | 1.07           | 3.06              | 0.70            | 16.09           | 18.76            | 3.36           | 19.06           |
| 44               | 75.33                 | 1.15             | 1.61          | 1.47            | 10.45            | 1.10           | 2.87              | 0.76            | 17.20           | 20.26            | 3.25           | 20.52           |
| 46               | 72.18                 | 1.16             | 1.58          | 1.45            | 11.20            | 1.12           | 2.75              | 0.79            | 17.83           | 21.19            | 3.15           | 21.42           |
| 50               | 68.16                 | 1.20             | 1.74          | 1.65            | 11.67            | 1.09           | 2.62              | 0.88            | 18.01           | 21.61            | 3.12           | 21.83           |

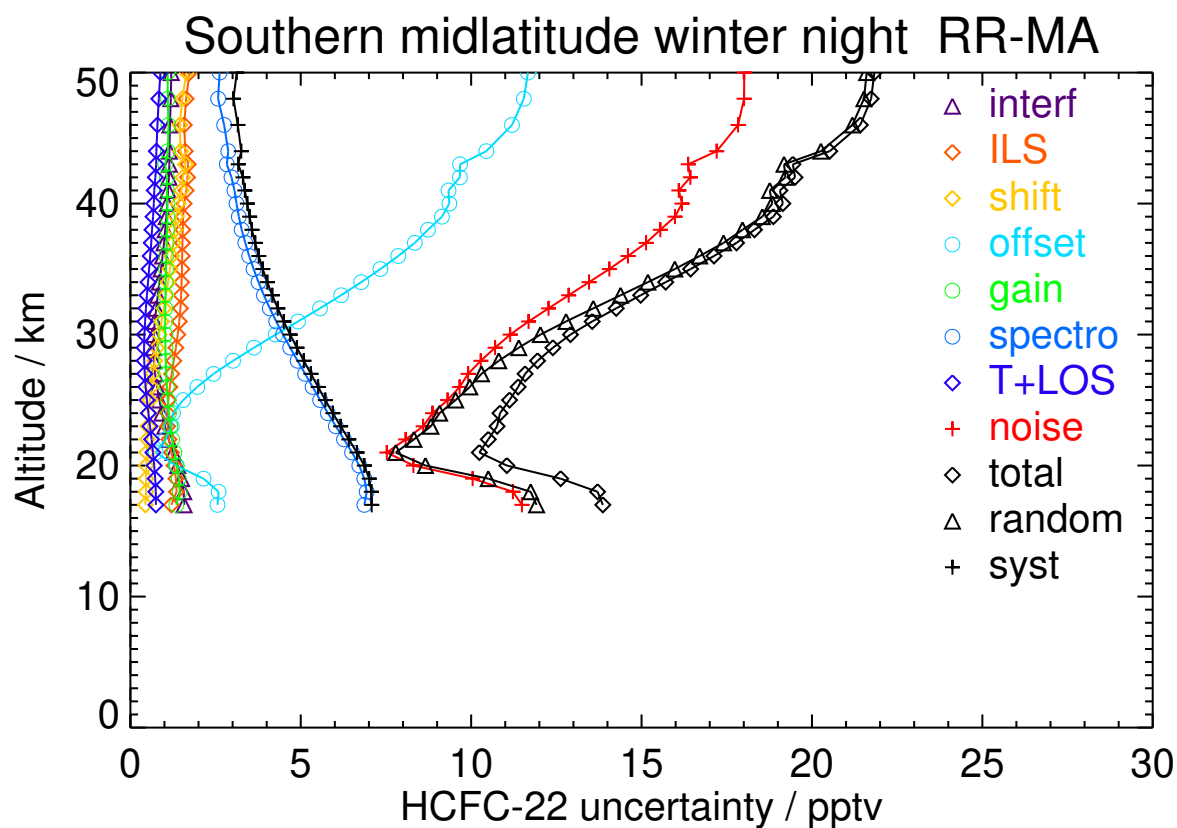

**Figure S88.** V8R\_F-22\_561 Southern midlatitude winter night

**Table S90.** HCFC-22 error budget for Southern midlatitude spring day. All uncertainties are  $1\sigma$ .

| altitude<br>(km) | mean target<br>(pptv) | interf<br>(pptv) | ILS<br>(pptv) | shift<br>(pptv) | offset<br>(pptv) | gain<br>(pptv) | spectro<br>(pptv) | T+LOS<br>(pptv) | noise<br>(pptv) | random<br>(pptv) | syst<br>(pptv) | total<br>(pptv) |
|------------------|-----------------------|------------------|---------------|-----------------|------------------|----------------|-------------------|-----------------|-----------------|------------------|----------------|-----------------|
| 20               | 131.57                | 1.41             | 1.01          | 0.58            | 1.35             | 1.38           | 5.93              | 0.57            | 7.82            | 8.26             | 5.96           | 10.18           |
| 23               | 130.57                | 1.03             | 0.96          | 0.71            | 1.09             | 1.49           | 5.45              | 0.44            | 7.99            | 8.28             | 5.57           | 9.98            |
| 26               | 132.79                | 0.77             | 1.10          | 0.86            | 1.11             | 1.26           | 5.26              | 0.38            | 8.75            | 8.96             | 5.43           | 10.48           |
| 29               | 125.68                | 0.65             | 1.42          | 1.01            | 2.17             | 1.11           | 4.98              | 0.38            | 9.28            | 9.66             | 5.20           | 10.97           |
| 32               | 112.34                | 0.70             | 1.61          | 1.18            | 3.76             | 1.03           | 4.52              | 0.44            | 10.25           | 11.05            | 4.81           | 12.05           |
| 35               | 98.81                 | 0.83             | 1.60          | 1.35            | 5.50             | 0.99           | 4.03              | 0.53            | 11.83           | 13.19            | 4.35           | 13.88           |
| 38               | 88.14                 | 0.96             | 1.55          | 1.48            | 7.05             | 0.97           | 3.62              | 0.63            | 13.53           | 15.40            | 3.95           | 15.90           |
| 41               | 81.19                 | 1.04             | 1.51          | 1.56            | 8.26             | 0.96           | 3.32              | 0.71            | 14.89           | 17.17            | 3.67           | 17.56           |
| 44               | 77.06                 | 1.09             | 1.49          | 1.60            | 9.11             | 0.95           | 3.13              | 0.77            | 15.75           | 18.34            | 3.49           | 18.66           |
| 46               | 73.09                 | 1.12             | 1.47          | 1.62            | 9.90             | 0.94           | 2.94              | 0.82            | 16.50           | 19.38            | 3.32           | 19.66           |
| 50               | 66.18                 | 1.14             | 1.46          | 1.64            | 10.81            | 0.87           | 2.59              | 0.88            | 17.23           | 20.47            | 3.01           | 20.69           |

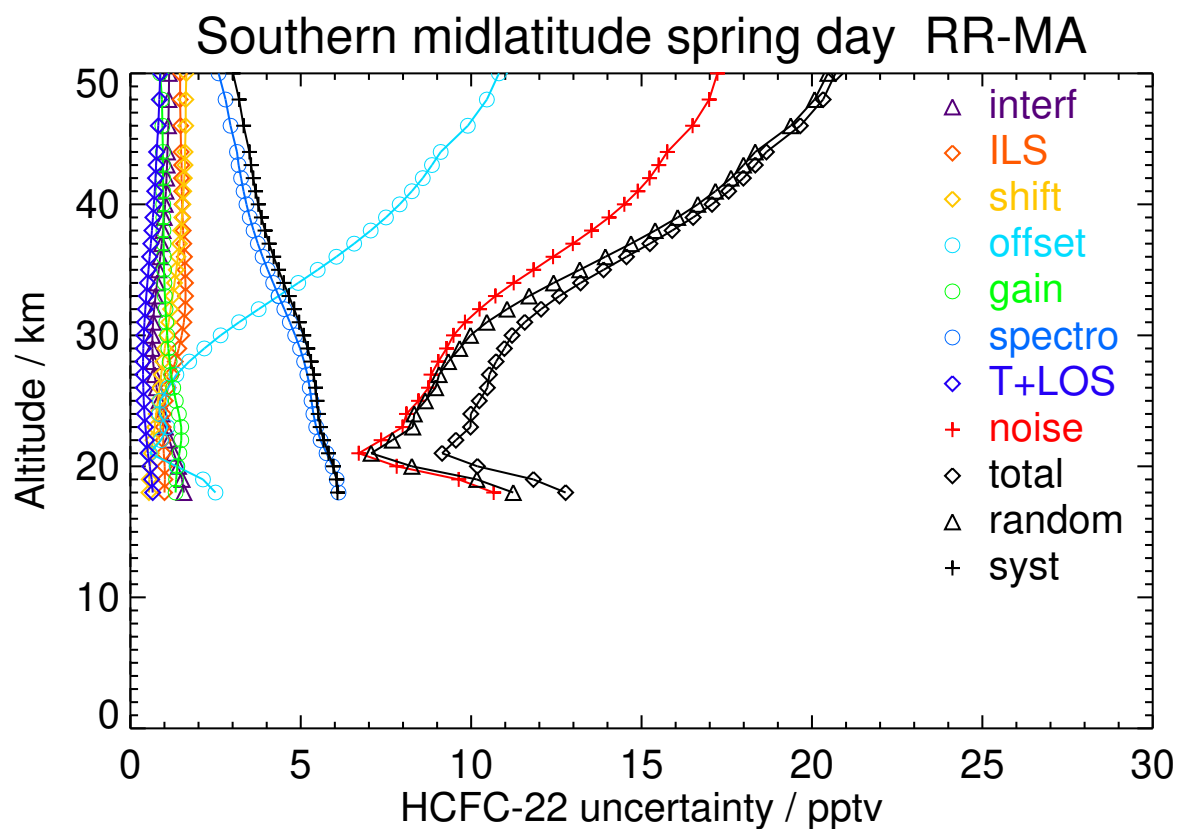

**Figure S89.** V8R\_F-22\_561 Southern midlatitude spring day

**Table S91.** HCFC-22 error budget for Southern midlatitude spring night. All uncertainties are  $1\sigma$ .

| altitude<br>(km) | mean target<br>(pptv) | interf<br>(pptv) | ILS<br>(pptv) | shift<br>(pptv) | offset<br>(pptv) | gain<br>(pptv) | spectro<br>(pptv) | T+LOS<br>(pptv) | noise<br>(pptv) | random<br>(pptv) | syst<br>(pptv) | total<br>(pptv) |
|------------------|-----------------------|------------------|---------------|-----------------|------------------|----------------|-------------------|-----------------|-----------------|------------------|----------------|-----------------|
| 17               | 140.90                | 1.71             | 0.88          | 0.54            | 2.54             | 1.71           | 6.76              | 0.65            | 10.11           | 10.69            | 6.89           | 12.72           |
| 20               | 138.53                | 1.44             | 1.16          | 0.56            | 1.02             | 1.53           | 6.52              | 0.61            | 7.05            | 7.41             | 6.69           | 9.99            |
| 23               | 132.06                | 1.03             | 1.10          | 0.69            | 1.02             | 1.38           | 5.87              | 0.47            | 8.02            | 8.28             | 6.02           | 10.24           |
| 26               | 126.81                | 0.78             | 1.24          | 0.84            | 1.15             | 1.23           | 5.30              | 0.39            | 8.78            | 9.00             | 5.48           | 10.54           |
| 29               | 120.24                | 0.64             | 1.47          | 1.02            | 2.19             | 1.10           | 4.72              | 0.38            | 9.28            | 9.68             | 4.96           | 10.88           |
| 32               | 110.08                | 0.70             | 1.58          | 1.22            | 3.78             | 1.04           | 4.20              | 0.42            | 10.23           | 11.06            | 4.46           | 11.93           |
| 35               | 101.17                | 0.83             | 1.56          | 1.40            | 5.49             | 1.03           | 3.77              | 0.51            | 11.80           | 13.18            | 4.04           | 13.78           |
| 38               | 95.34                 | 0.96             | 1.51          | 1.54            | 7.03             | 1.04           | 3.45              | 0.61            | 13.49           | 15.38            | 3.72           | 15.82           |
| 41               | 91.51                 | 1.05             | 1.48          | 1.63            | 8.23             | 1.04           | 3.24              | 0.69            | 14.84           | 17.14            | 3.52           | 17.50           |
| 44               | 88.57                 | 1.10             | 1.46          | 1.67            | 9.08             | 1.04           | 3.09              | 0.75            | 15.71           | 18.31            | 3.39           | 18.62           |
| 46               | 85.45                 | 1.13             | 1.45          | 1.69            | 9.88             | 1.02           | 2.95              | 0.80            | 16.45           | 19.35            | 3.26           | 19.62           |
| 50               | 81.30                 | 1.15             | 1.45          | 1.69            | 10.83            | 0.99           | 2.76              | 0.85            | 17.21           | 20.48            | 3.09           | 20.71           |

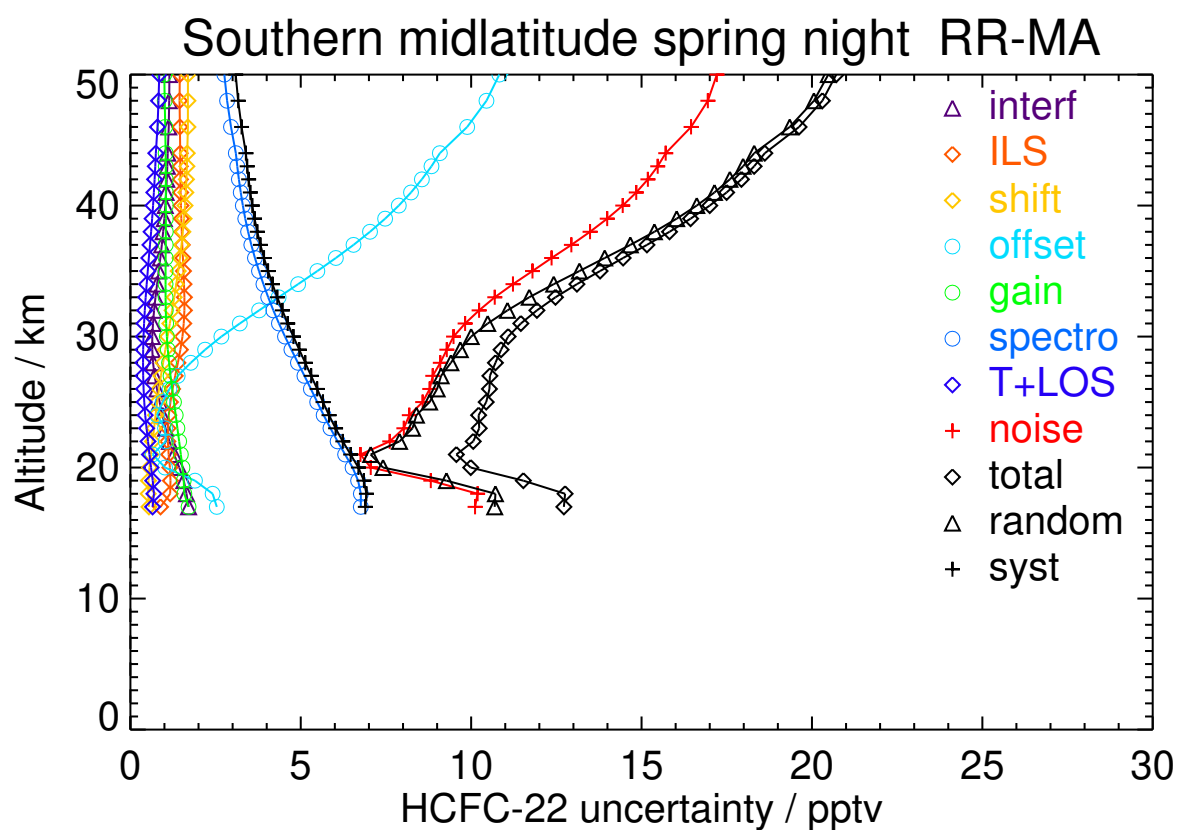

**Figure S90.** V8R\_F-22\_561 Southern midlatitude spring night

**Table S92.** HCFC-22 error budget for Southern midlatitude summer day. All uncertainties are  $1\sigma$ .

| altitude<br>(km) | mean target<br>(pptv) | interf<br>(pptv) | ILS<br>(pptv) | shift<br>(pptv) | offset<br>(pptv) | gain<br>(pptv) | spectro<br>(pptv) | T+LOS<br>(pptv) | noise<br>(pptv) | random<br>(pptv) | syst<br>(pptv) | total<br>(pptv) |
|------------------|-----------------------|------------------|---------------|-----------------|------------------|----------------|-------------------|-----------------|-----------------|------------------|----------------|-----------------|
| 17               | 156.33                | 1.78             | 1.56          | 0.38            | 2.50             | 1.79           | 8.08              | 0.89            | 9.58            | 10.21            | 8.30           | 13.16           |
| 20               | 143.15                | 1.35             | 1.45          | 0.45            | 0.67             | 1.80           | 7.54              | 0.77            | 6.18            | 6.53             | 7.79           | 10.17           |
| 23               | 124.17                | 0.98             | 1.26          | 0.58            | 0.74             | 1.45           | 6.43              | 0.59            | 7.66            | 7.84             | 6.66           | 10.29           |
| 26               | 110.92                | 0.75             | 1.26          | 0.75            | 0.93             | 0.97           | 5.12              | 0.44            | 8.41            | 8.56             | 5.34           | 10.09           |
| 29               | 102.41                | 0.60             | 1.43          | 0.99            | 1.78             | 0.72           | 4.13              | 0.41            | 8.90            | 9.17             | 4.41           | 10.18           |
| 32               | 96.29                 | 0.66             | 1.48          | 1.27            | 3.19             | 0.65           | 3.50              | 0.46            | 9.54            | 10.18            | 3.83           | 10.88           |
| 35               | 92.20                 | 0.81             | 1.41          | 1.54            | 4.86             | 0.63           | 3.11              | 0.57            | 10.75           | 11.95            | 3.44           | 12.43           |
| 38               | 88.52                 | 0.96             | 1.35          | 1.74            | 6.47             | 0.64           | 2.86              | 0.69            | 12.37           | 14.13            | 3.18           | 14.48           |
| 41               | 85.23                 | 1.07             | 1.33          | 1.87            | 7.80             | 0.64           | 2.71              | 0.80            | 13.82           | 16.04            | 3.03           | 16.33           |
| 44               | 82.48                 | 1.13             | 1.33          | 1.93            | 8.78             | 0.63           | 2.60              | 0.87            | 14.81           | 17.39            | 2.94           | 17.64           |
| 46               | 79.46                 | 1.18             | 1.35          | 1.97            | 9.74             | 0.62           | 2.50              | 0.93            | 15.73           | 18.68            | 2.85           | 18.89           |
| 50               | 74.90                 | 1.22             | 1.37          | 1.97            | 10.91            | 0.59           | 2.34              | 0.99            | 16.82           | 20.21            | 2.71           | 20.39           |

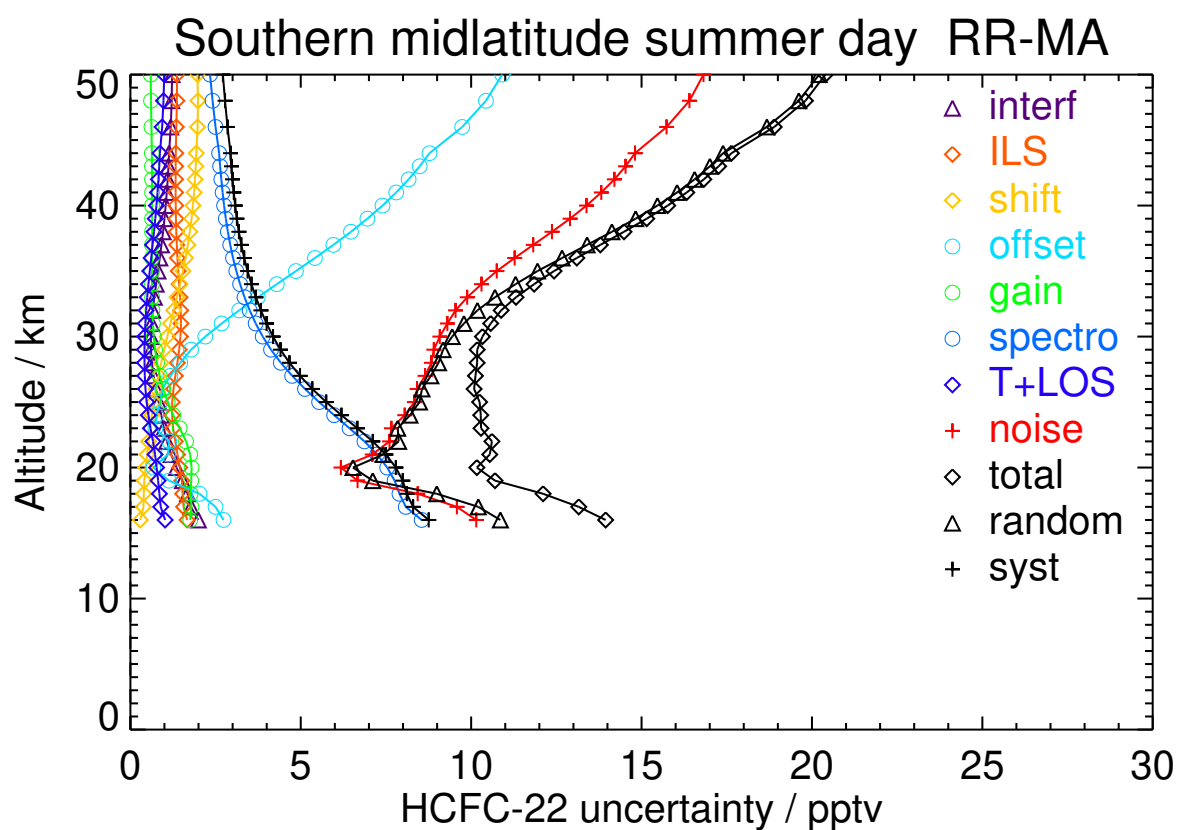

**Figure S91.** V8R\_F-22\_561 Southern midlatitude summer day

**Table S93.** HCFC-22 error budget for Southern midlatitude summer night. All uncertainties are  $1\sigma$ .

| altitude<br>(km) | mean target<br>(pptv) | interf<br>(pptv) | ILS<br>(pptv) | shift<br>(pptv) | offset<br>(pptv) | gain<br>(pptv) | spectro<br>(pptv) | T+LOS<br>(pptv) | noise<br>(pptv) | random<br>(pptv) | syst<br>(pptv) | total<br>(pptv) |
|------------------|-----------------------|------------------|---------------|-----------------|------------------|----------------|-------------------|-----------------|-----------------|------------------|----------------|-----------------|
| 17               | 156.94                | 1.86             | 1.41          | 0.40            | 2.62             | 1.80           | 8.42              | 0.95            | 9.95            | 10.57            | 8.65           | 13.65           |
| 20               | 140.97                | 1.46             | 1.31          | 0.48            | 0.72             | 1.73           | 7.57              | 0.77            | 6.28            | 6.64             | 7.79           | 10.24           |
| 23               | 121.21                | 1.03             | 1.15          | 0.60            | 0.89             | 1.46           | 6.18              | 0.57            | 7.74            | 7.96             | 6.39           | 10.20           |
| 26               | 111.56                | 0.77             | 1.21          | 0.77            | 0.95             | 0.99           | 4.89              | 0.42            | 8.45            | 8.60             | 5.11           | 10.00           |
| 29               | 106.10                | 0.61             | 1.50          | 1.02            | 1.73             | 0.73           | 4.05              | 0.40            | 8.90            | 9.16             | 4.36           | 10.15           |
| 32               | 99.31                 | 0.66             | 1.68          | 1.32            | 3.07             | 0.62           | 3.46              | 0.47            | 9.46            | 10.07            | 3.87           | 10.79           |
| 35               | 91.76                 | 0.82             | 1.67          | 1.62            | 4.69             | 0.57           | 3.03              | 0.58            | 10.56           | 11.72            | 3.48           | 12.22           |
| 38               | 85.67                 | 0.98             | 1.67          | 1.85            | 6.29             | 0.54           | 2.76              | 0.71            | 12.10           | 13.83            | 3.23           | 14.20           |
| 41               | 81.26                 | 1.10             | 1.69          | 2.00            | 7.63             | 0.52           | 2.60              | 0.82            | 13.54           | 15.74            | 3.10           | 16.04           |
| 44               | 78.36                 | 1.18             | 1.71          | 2.08            | 8.64             | 0.50           | 2.51              | 0.89            | 14.56           | 17.13            | 3.02           | 17.40           |
| 46               | 75.41                 | 1.24             | 1.74          | 2.13            | 9.64             | 0.48           | 2.41              | 0.96            | 15.55           | 18.50            | 2.95           | 18.73           |
| 50               | 70.92                 | 1.28             | 1.77          | 2.14            | 10.91            | 0.45           | 2.26              | 1.03            | 16.77           | 20.20            | 2.85           | 20.40           |

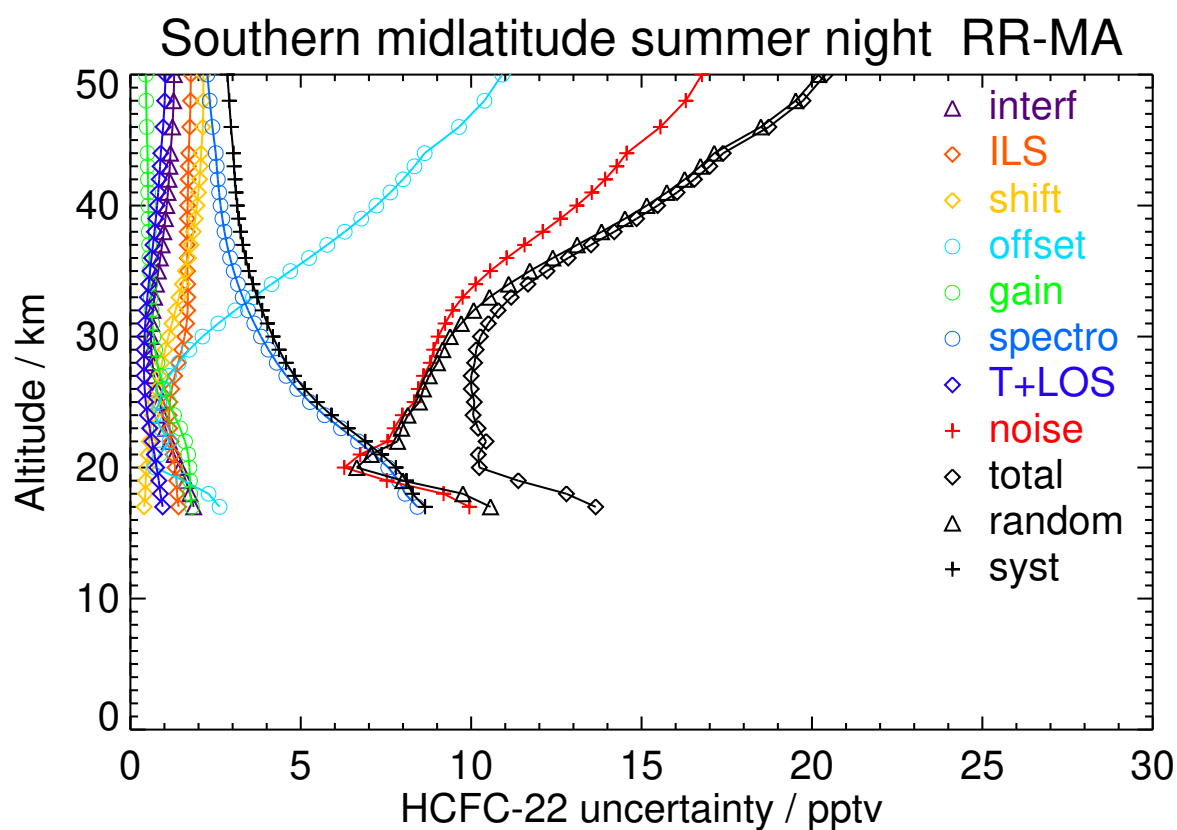

**Figure S92.** V8R\_F-22\_561 Southern midlatitude summer night

**Table S94.** HCFC-22 error budget for Southern midlatitude autumn day. All uncertainties are  $1\sigma$ .

| altitude<br>(km) | mean target<br>(pptv) | interf<br>(pptv) | ILS<br>(pptv) | shift<br>(pptv) | offset<br>(pptv) | gain<br>(pptv) | spectro<br>(pptv) | T+LOS<br>(pptv) | noise<br>(pptv) | random<br>(pptv) | syst<br>(pptv) | total<br>(pptv) |
|------------------|-----------------------|------------------|---------------|-----------------|------------------|----------------|-------------------|-----------------|-----------------|------------------|----------------|-----------------|
| 20               | 146.26                | 1.41             | 1.57          | 0.43            | 1.36             | 1.91           | 7.70              | 0.81            | 7.72            | 8.12             | 7.99           | 11.39           |
| 23               | 129.10                | 1.01             | 1.46          | 0.55            | 1.16             | 1.93           | 6.75              | 0.67            | 8.13            | 8.37             | 7.10           | 10.98           |
| 26               | 115.18                | 0.76             | 1.38          | 0.68            | 1.31             | 1.54           | 5.46              | 0.47            | 8.94            | 9.14             | 5.78           | 10.82           |
| 29               | 103.17                | 0.63             | 1.42          | 0.85            | 2.54             | 1.20           | 4.40              | 0.38            | 9.54            | 9.96             | 4.72           | 11.02           |
| 32               | 93.77                 | 0.68             | 1.47          | 1.03            | 4.25             | 1.05           | 3.68              | 0.40            | 10.67           | 11.58            | 4.05           | 12.27           |
| 35               | 87.64                 | 0.82             | 1.46          | 1.18            | 6.02             | 1.02           | 3.23              | 0.47            | 12.38           | 13.86            | 3.63           | 14.33           |
| 38               | 83.84                 | 0.94             | 1.44          | 1.30            | 7.55             | 1.04           | 2.93              | 0.54            | 14.09           | 16.09            | 3.36           | 16.44           |
| 41               | 81.16                 | 1.01             | 1.43          | 1.37            | 8.71             | 1.05           | 2.74              | 0.60            | 15.36           | 17.76            | 3.20           | 18.05           |
| 44               | 79.11                 | 1.05             | 1.43          | 1.40            | 9.49             | 1.06           | 2.61              | 0.64            | 16.12           | 18.81            | 3.10           | 19.06           |
| 46               | 76.75                 | 1.06             | 1.42          | 1.41            | 10.20            | 1.06           | 2.49              | 0.68            | 16.73           | 19.69            | 2.99           | 19.92           |
| 50               | 86.51                 | 1.08             | 1.54          | 1.51            | 10.97            | 1.05           | 2.66              | 0.74            | 17.19           | 20.50            | 3.22           | 20.75           |

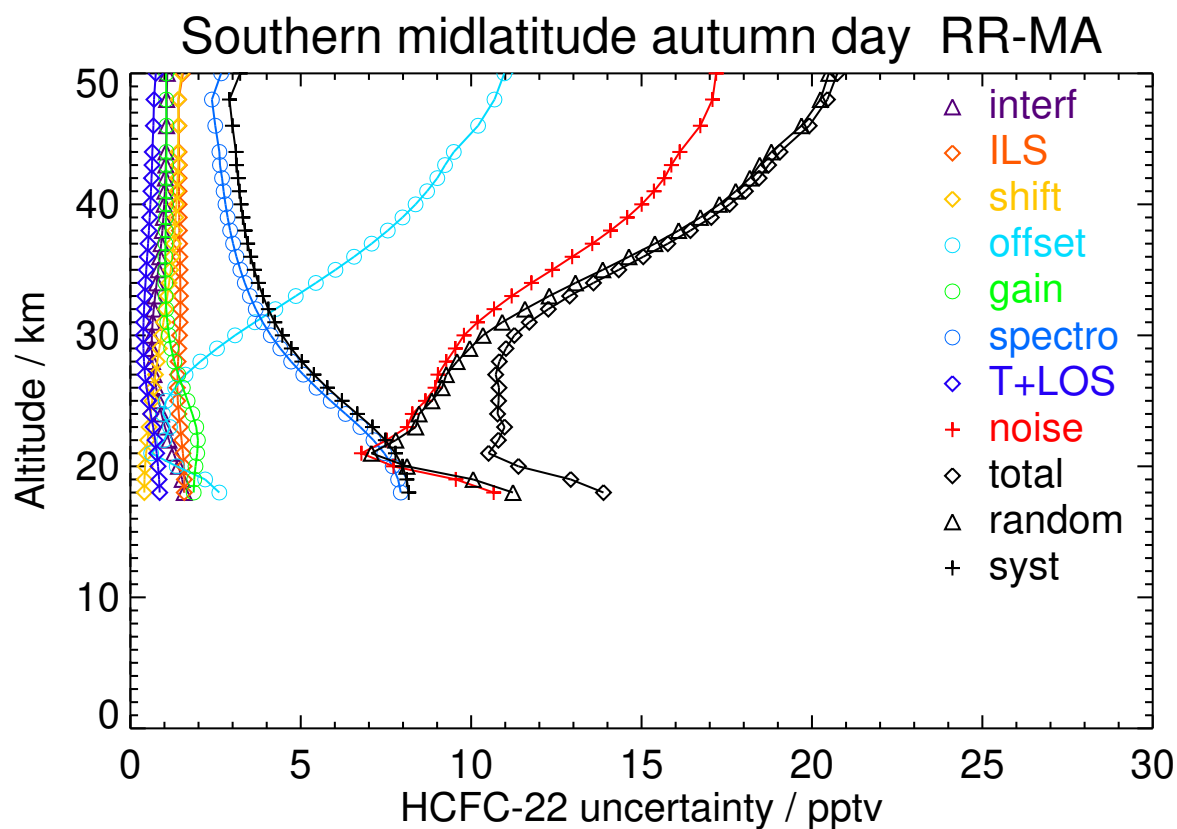

**Figure S93.** V8R\_F-22\_561 Southern midlatitude autumn day

**Table S95.** HCFC-22 error budget for Southern midlatitude autumn night. All uncertainties are  $1\sigma$ .

| altitude<br>(km) | mean target<br>(pptv) | interf<br>(pptv) | ILS<br>(pptv) | shift<br>(pptv) | offset<br>(pptv) | gain<br>(pptv) | spectro<br>(pptv) | T+LOS<br>(pptv) | noise<br>(pptv) | random<br>(pptv) | syst<br>(pptv) | total<br>(pptv) |
|------------------|-----------------------|------------------|---------------|-----------------|------------------|----------------|-------------------|-----------------|-----------------|------------------|----------------|-----------------|
| 20               | 140.80                | 1.44             | 1.49          | 0.44            | 1.32             | 1.91           | 7.25              | 0.77            | 7.72            | 8.15             | 7.50           | 11.07           |
| 23               | 126.87                | 1.00             | 1.34          | 0.55            | 1.10             | 1.85           | 6.38              | 0.62            | 8.15            | 8.43             | 6.65           | 10.74           |
| 26               | 116.07                | 0.75             | 1.27          | 0.68            | 1.31             | 1.40           | 5.27              | 0.44            | 8.97            | 9.16             | 5.54           | 10.71           |
| 29               | 107.72                | 0.63             | 1.36          | 0.84            | 2.57             | 1.09           | 4.40              | 0.37            | 9.56            | 9.98             | 4.70           | 11.03           |
| 32               | 100.96                | 0.69             | 1.46          | 1.03            | 4.30             | 0.97           | 3.81              | 0.39            | 10.72           | 11.64            | 4.15           | 12.35           |
| 35               | 94.73                 | 0.83             | 1.47          | 1.19            | 6.06             | 0.94           | 3.40              | 0.47            | 12.44           | 13.93            | 3.78           | 14.44           |
| 38               | 90.13                 | 0.95             | 1.46          | 1.31            | 7.58             | 0.95           | 3.12              | 0.55            | 14.14           | 16.14            | 3.52           | 16.52           |
| 41               | 86.49                 | 1.02             | 1.44          | 1.38            | 8.73             | 0.96           | 2.93              | 0.62            | 15.42           | 17.82            | 3.35           | 18.13           |
| 44               | 83.60                 | 1.05             | 1.44          | 1.42            | 9.51             | 0.97           | 2.81              | 0.66            | 16.18           | 18.87            | 3.24           | 19.15           |
| 46               | 80.66                 | 1.07             | 1.44          | 1.43            | 10.22            | 0.96           | 2.68              | 0.70            | 16.79           | 19.76            | 3.13           | 20.01           |
| 50               | 88.39                 | 1.10             | 1.46          | 1.54            | 10.94            | 0.93           | 2.67              | 0.77            | 17.15           | 20.45            | 3.15           | 20.69           |

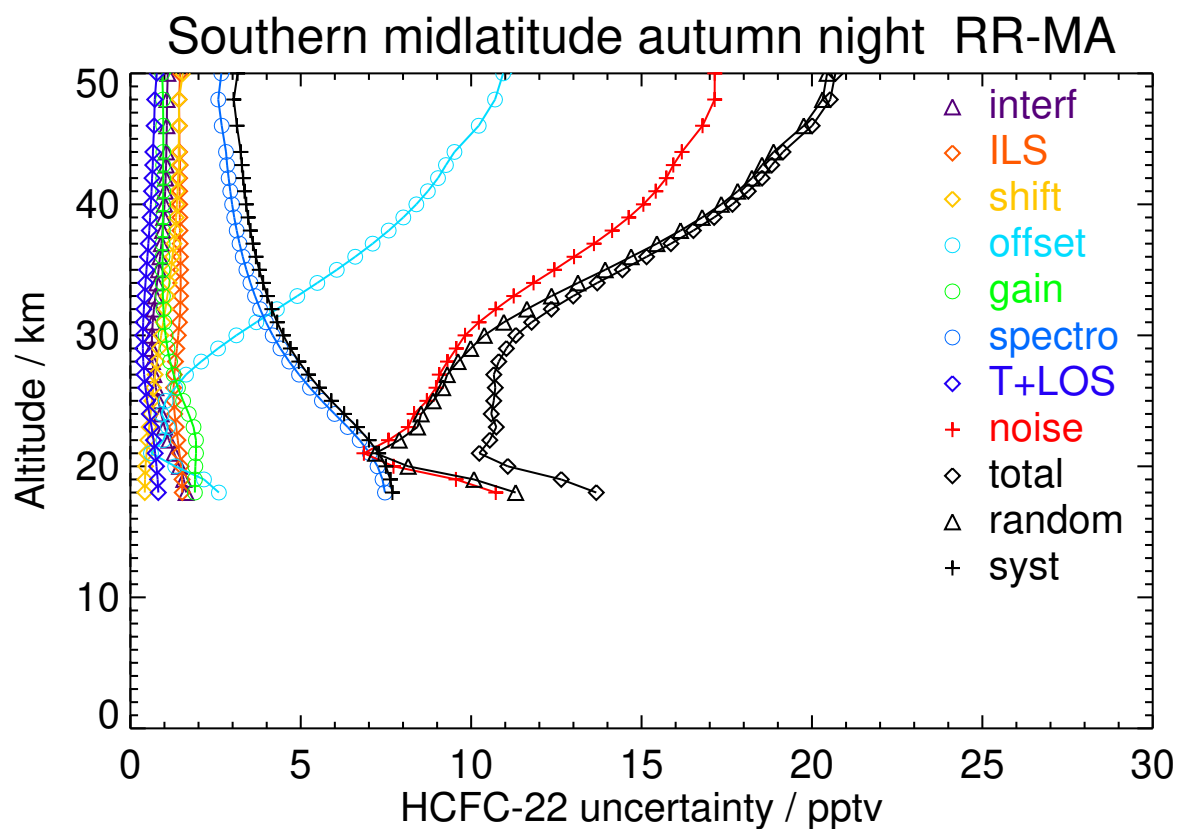

**Figure S94.** V8R\_F-22\_561 Southern midlatitude autumn night

**Table S96.** HCFC-22 error budget for Southern polar winter day. All uncertainties are  $1\sigma$ .

| altitude<br>(km) | mean target<br>(pptv) | interf<br>(pptv) | ILS<br>(pptv) | shift<br>(pptv) | offset<br>(pptv) | gain<br>(pptv) | spectro<br>(pptv) | T+LOS<br>(pptv) | noise<br>(pptv) | random<br>(pptv) | syst<br>(pptv) | total<br>(pptv) |
|------------------|-----------------------|------------------|---------------|-----------------|------------------|----------------|-------------------|-----------------|-----------------|------------------|----------------|-----------------|
| 17               | 105.41                | 2.13             | 2.43          | 0.31            | 3.12             | 0.76           | 5.42              | 0.82            | 13.84           | 14.40            | 5.93           | 15.57           |
| 20               | 99.25                 | 1.81             | 1.94          | 0.33            | 2.15             | 0.76           | 5.60              | 0.85            | 11.93           | 12.36            | 5.82           | 13.66           |
| 23               | 82.64                 | 1.29             | 1.65          | 0.36            | 1.85             | 0.63           | 4.57              | 0.69            | 10.26           | 10.59            | 4.79           | 11.62           |
| 26               | 67.47                 | 0.89             | 1.43          | 0.53            | 3.03             | 0.54           | 3.33              | 0.54            | 10.88           | 11.39            | 3.56           | 11.93           |
| 29               | 56.73                 | 0.74             | 1.35          | 0.81            | 4.69             | 0.50           | 2.33              | 0.52            | 11.85           | 12.83            | 2.61           | 13.09           |
| 32               | 48.83                 | 0.87             | 1.35          | 1.12            | 6.50             | 0.49           | 1.80              | 0.63            | 13.29           | 14.90            | 2.14           | 15.05           |
| 35               | 43.17                 | 1.05             | 1.35          | 1.38            | 8.14             | 0.51           | 1.67              | 0.77            | 14.89           | 17.10            | 2.01           | 17.22           |
| 38               | 39.50                 | 1.19             | 1.36          | 1.57            | 9.47             | 0.54           | 1.71              | 0.89            | 16.29           | 18.99            | 2.02           | 19.10           |
| 41               | 38.88                 | 1.30             | 1.45          | 1.81            | 10.18            | 0.50           | 1.85              | 1.00            | 16.94           | 19.93            | 2.18           | 20.05           |
| 44               | 36.53                 | 1.34             | 1.45          | 1.85            | 10.88            | 0.51           | 1.85              | 1.05            | 17.57           | 20.85            | 2.19           | 20.96           |
| 46               | 34.35                 | 1.34             | 1.39          | 1.77            | 11.64            | 0.57           | 1.78              | 1.06            | 18.18           | 21.75            | 2.11           | 21.85           |
| 50               | 46.73                 | 1.35             | 1.38          | 2.08            | 11.43            | 0.54           | 2.14              | 1.10            | 17.63           | 21.19            | 2.53           | 21.34           |

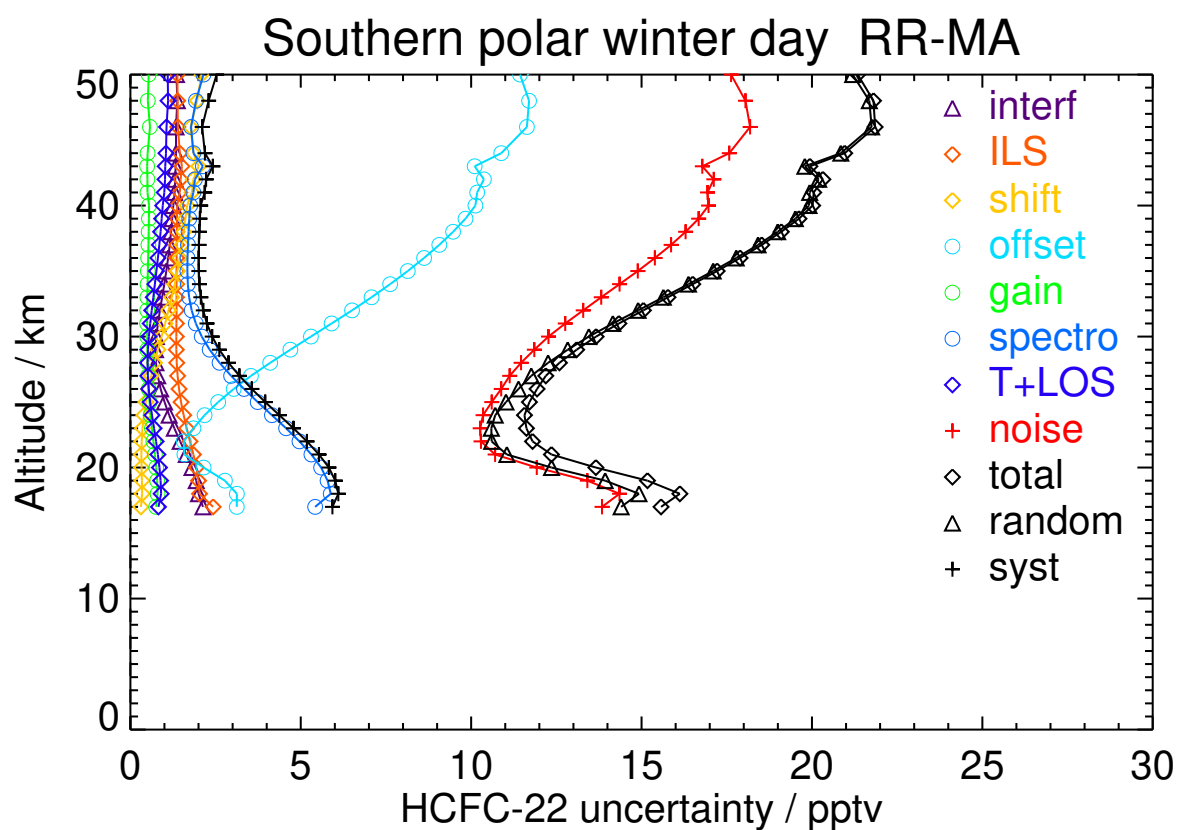

**Figure S95.** V8R\_F-22\_561 Southern polar winter day

**Table S97.** HCFC-22 error budget for Southern polar winter night. All uncertainties are  $1\sigma$ .

| altitude<br>(km) | mean target<br>(pptv) | interf<br>(pptv) | ILS<br>(pptv) | shift<br>(pptv) | offset<br>(pptv) | gain<br>(pptv) | spectro<br>(pptv) | T+LOS<br>(pptv) | noise<br>(pptv) | random<br>(pptv) | syst<br>(pptv) | total<br>(pptv) |
|------------------|-----------------------|------------------|---------------|-----------------|------------------|----------------|-------------------|-----------------|-----------------|------------------|----------------|-----------------|
| 20               | 108.76                | 1.64             | 1.98          | 0.32            | 2.41             | 0.70           | 5.54              | 0.83            | 12.65           | 13.07            | 5.80           | 14.30           |
| 23               | 94.99                 | 1.22             | 1.78          | 0.38            | 1.77             | 0.62           | 4.84              | 0.71            | 10.27           | 10.57            | 5.10           | 11.73           |
| 26               | 79.04                 | 0.88             | 1.65          | 0.55            | 2.95             | 0.57           | 3.84              | 0.57            | 10.78           | 11.27            | 4.12           | 12.00           |
| 29               | 65.67                 | 0.75             | 1.64          | 0.84            | 4.65             | 0.55           | 2.85              | 0.53            | 11.77           | 12.75            | 3.21           | 13.15           |
| 32               | 55.00                 | 0.88             | 1.68          | 1.16            | 6.50             | 0.56           | 2.15              | 0.61            | 13.25           | 14.87            | 2.64           | 15.10           |
| 35               | 48.72                 | 1.05             | 1.71          | 1.43            | 8.16             | 0.60           | 1.82              | 0.73            | 14.87           | 17.10            | 2.40           | 17.26           |
| 38               | 44.90                 | 1.20             | 1.74          | 1.64            | 9.47             | 0.63           | 1.71              | 0.85            | 16.22           | 18.94            | 2.34           | 19.08           |
| 41               | 40.82                 | 1.29             | 1.83          | 1.86            | 10.14            | 0.64           | 1.66              | 0.92            | 16.82           | 19.82            | 2.39           | 19.96           |
| 44               | 40.14                 | 1.33             | 1.80          | 1.86            | 11.01            | 0.66           | 1.67              | 0.97            | 17.63           | 20.95            | 2.37           | 21.09           |
| 46               | 39.94                 | 1.34             | 1.77          | 1.83            | 11.76            | 0.69           | 1.68              | 1.01            | 18.23           | 21.86            | 2.35           | 21.99           |
| 50               | 30.20                 | 1.35             | 1.99          | 2.24            | 11.32            | 0.54           | 1.68              | 0.99            | 17.42           | 20.96            | 2.61           | 21.13           |

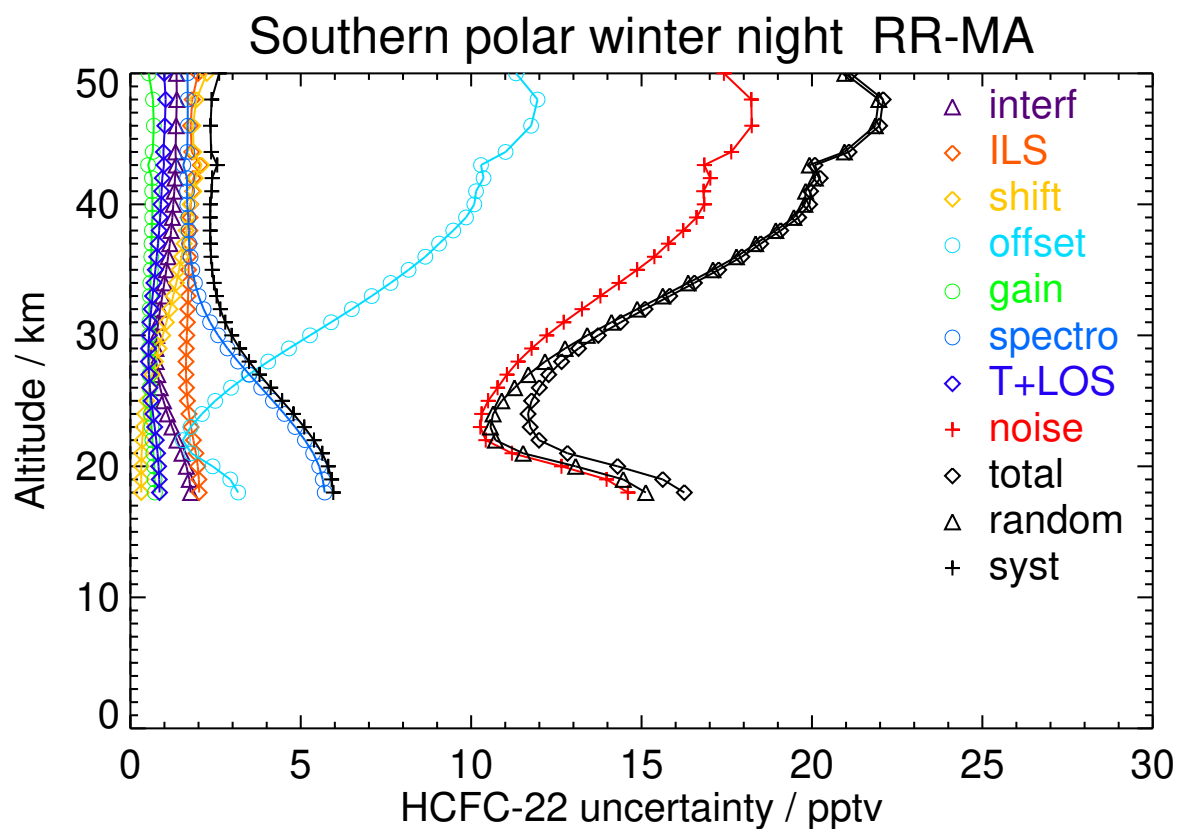

**Figure S96.** V8R\_F-22\_561 Southern polar winter night

**Table S98.** HCFC-22 error budget for Southern polar spring day. All uncertainties are  $1\sigma$ .

| altitude<br>(km) | mean target<br>(pptv) | interf<br>(pptv) | ILS<br>(pptv) | shift<br>(pptv) | offset<br>(pptv) | gain<br>(pptv) | spectro<br>(pptv) | T+LOS<br>(pptv) | noise<br>(pptv) | random<br>(pptv) | syst<br>(pptv) | total<br>(pptv) |
|------------------|-----------------------|------------------|---------------|-----------------|------------------|----------------|-------------------|-----------------|-----------------|------------------|----------------|-----------------|
| 20               | 83.31                 | 1.73             | 1.68          | 0.48            | 1.74             | 0.71           | 4.10              | 0.55            | 10.06           | 10.52            | 4.15           | 11.31           |
| 23               | 81.21                 | 1.13             | 1.29          | 0.77            | 1.00             | 0.94           | 3.46              | 0.48            | 8.43            | 8.79             | 3.37           | 9.42            |
| 26               | 84.22                 | 0.80             | 1.05          | 1.11            | 1.09             | 0.79           | 3.13              | 0.47            | 8.86            | 9.18             | 3.02           | 9.66            |
| 29               | 82.72                 | 0.72             | 1.31          | 1.47            | 1.96             | 0.70           | 3.08              | 0.53            | 9.17            | 9.68             | 2.98           | 10.13           |
| 32               | 80.24                 | 0.84             | 1.57          | 1.80            | 3.36             | 0.68           | 2.98              | 0.61            | 9.85            | 10.75            | 2.99           | 11.16           |
| 35               | 78.12                 | 0.99             | 1.57          | 2.04            | 5.00             | 0.68           | 2.81              | 0.68            | 11.25           | 12.63            | 2.89           | 12.96           |
| 38               | 75.38                 | 1.11             | 1.53          | 2.19            | 6.54             | 0.70           | 2.65              | 0.76            | 12.93           | 14.78            | 2.80           | 15.04           |
| 41               | 72.94                 | 1.18             | 1.51          | 2.26            | 7.77             | 0.71           | 2.53              | 0.83            | 14.33           | 16.57            | 2.74           | 16.79           |
| 44               | 71.24                 | 1.22             | 1.50          | 2.28            | 8.64             | 0.72           | 2.44              | 0.88            | 15.25           | 17.78            | 2.68           | 17.99           |
| 46               | 69.21                 | 1.25             | 1.50          | 2.28            | 9.49             | 0.71           | 2.34              | 0.92            | 16.07           | 18.90            | 2.63           | 19.08           |
| 50               | 65.74                 | 1.26             | 1.49          | 2.23            | 10.49            | 0.70           | 2.19              | 0.97            | 16.95           | 20.15            | 2.52           | 20.30           |

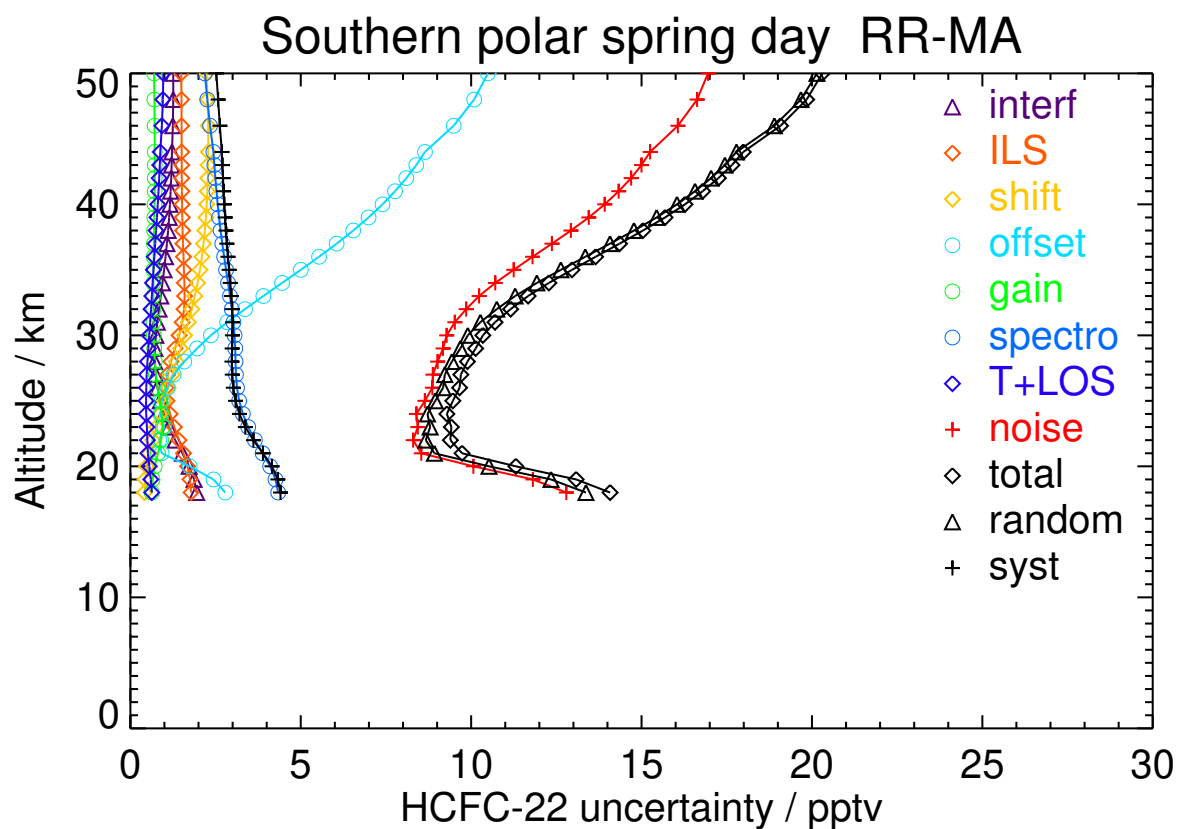

**Figure S97.** V8R\_F-22\_561 Southern polar spring day

**Table S99.** HCFC-22 error budget for Southern polar spring night. All uncertainties are  $1\sigma$ .

| altitude<br>(km) | mean target<br>(pptv) | interf<br>(pptv) | ILS<br>(pptv) | shift<br>(pptv) | offset<br>(pptv) | gain<br>(pptv) | spectro<br>(pptv) | T+LOS<br>(pptv) | noise<br>(pptv) | random<br>(pptv) | syst<br>(pptv) | total<br>(pptv) |
|------------------|-----------------------|------------------|---------------|-----------------|------------------|----------------|-------------------|-----------------|-----------------|------------------|----------------|-----------------|
| 20               | 94.10                 | 1.59             | 1.52          | 0.53            | 1.54             | 0.90           | 4.48              | 0.51            | 9.34            | 9.73             | 4.60           | 10.76           |
| 23               | 93.05                 | 1.10             | 1.24          | 0.78            | 0.99             | 0.95           | 3.95              | 0.43            | 8.33            | 8.61             | 4.04           | 9.51            |
| 26               | 96.53                 | 0.81             | 1.21          | 1.10            | 1.12             | 0.92           | 3.61              | 0.41            | 8.84            | 9.14             | 3.64           | 9.84            |
| 29               | 94.07                 | 0.70             | 1.55          | 1.41            | 2.04             | 0.91           | 3.39              | 0.46            | 9.20            | 9.71             | 3.46           | 10.31           |
| 32               | 86.92                 | 0.80             | 1.78          | 1.69            | 3.49             | 0.89           | 3.11              | 0.53            | 9.95            | 10.84            | 3.32           | 11.34           |
| 35               | 81.03                 | 0.95             | 1.78          | 1.91            | 5.14             | 0.89           | 2.86              | 0.60            | 11.38           | 12.77            | 3.15           | 13.15           |
| 38               | 75.69                 | 1.07             | 1.75          | 2.06            | 6.67             | 0.90           | 2.67              | 0.68            | 13.07           | 14.93            | 3.03           | 15.23           |
| 41               | 71.91                 | 1.15             | 1.74          | 2.14            | 7.89             | 0.91           | 2.54              | 0.75            | 14.46           | 16.71            | 2.95           | 16.97           |
| 44               | 69.18                 | 1.19             | 1.73          | 2.17            | 8.75             | 0.91           | 2.45              | 0.80            | 15.36           | 17.91            | 2.90           | 18.14           |
| 46               | 66.49                 | 1.22             | 1.73          | 2.17            | 9.57             | 0.90           | 2.35              | 0.84            | 16.15           | 18.99            | 2.84           | 19.20           |
| 50               | 62.33                 | 1.23             | 1.71          | 2.13            | 10.53            | 0.88           | 2.21              | 0.88            | 16.98           | 20.17            | 2.74           | 20.36           |

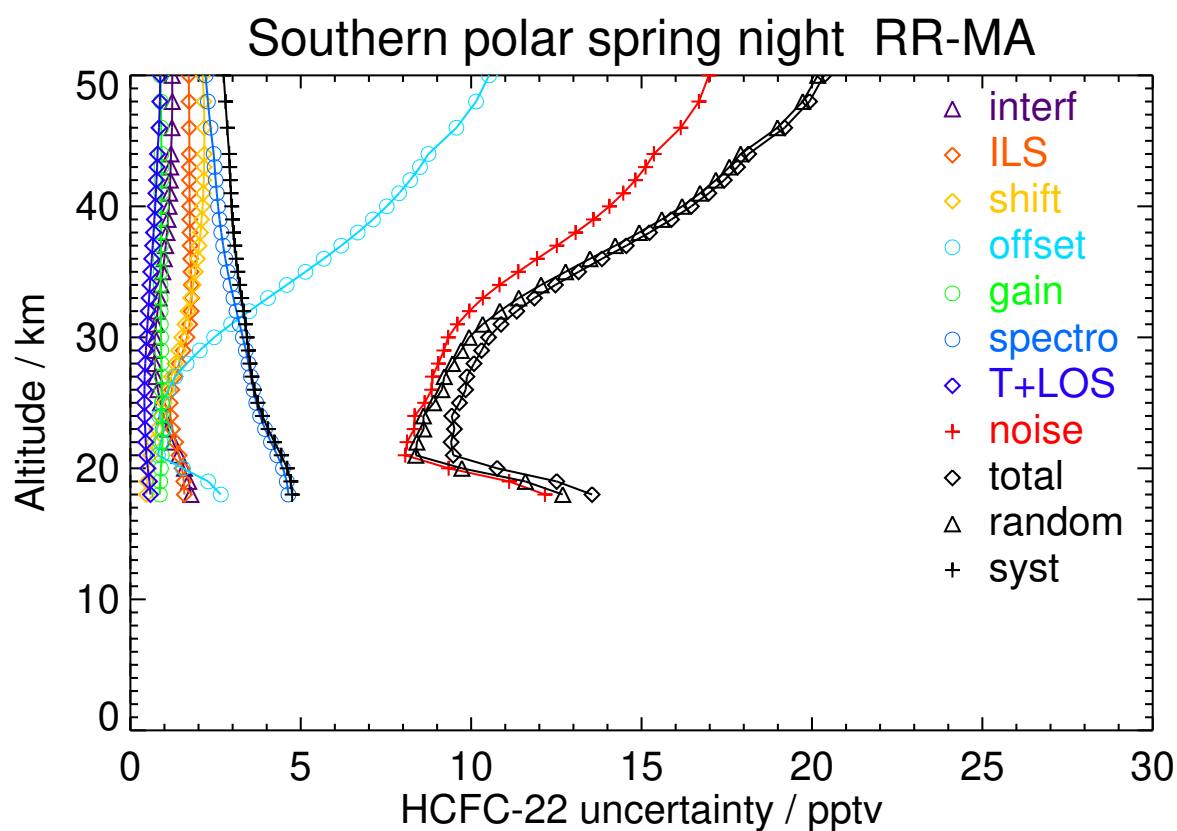

**Figure S98.** V8R\_F-22\_561 Southern polar spring night

**Table S100.** HCFC-22 error budget for Southern polar summer day. All uncertainties are  $1\sigma$ .

| altitude<br>(km) | mean target<br>(pptv) | interf<br>(pptv) | ILS<br>(pptv) | shift<br>(pptv) | offset<br>(pptv) | gain<br>(pptv) | spectro<br>(pptv) | T+LOS<br>(pptv) | noise<br>(pptv) | random<br>(pptv) | syst<br>(pptv) | total<br>(pptv) |
|------------------|-----------------------|------------------|---------------|-----------------|------------------|----------------|-------------------|-----------------|-----------------|------------------|----------------|-----------------|
| 17               | 142.71                | 1.61             | 0.91          | 0.58            | 2.47             | 1.46           | 6.90              | 0.69            | 9.59            | 10.14            | 7.03           | 12.33           |
| 20               | 126.55                | 1.40             | 0.80          | 0.64            | 1.07             | 1.19           | 5.83              | 0.53            | 6.68            | 7.08             | 5.86           | 9.19            |
| 23               | 117.94                | 1.05             | 0.78          | 0.75            | 1.05             | 1.19           | 4.98              | 0.42            | 7.52            | 7.77             | 5.10           | 9.29            |
| 26               | 111.88                | 0.80             | 1.13          | 0.82            | 0.85             | 1.01           | 4.40              | 0.37            | 8.22            | 8.37             | 4.62           | 9.56            |
| 29               | 105.20                | 0.63             | 1.70          | 1.01            | 1.43             | 0.80           | 3.97              | 0.42            | 8.68            | 8.90             | 4.37           | 9.91            |
| 32               | 97.59                 | 0.66             | 1.92          | 1.32            | 2.59             | 0.60           | 3.53              | 0.51            | 9.13            | 9.63             | 4.03           | 10.44           |
| 35               | 89.76                 | 0.82             | 1.76          | 1.66            | 4.10             | 0.49           | 3.13              | 0.66            | 10.04           | 11.03            | 3.59           | 11.60           |
| 38               | 81.77                 | 0.99             | 1.59          | 1.96            | 5.68             | 0.42           | 2.81              | 0.82            | 11.40           | 12.96            | 3.22           | 13.35           |
| 41               | 75.14                 | 1.14             | 1.49          | 2.18            | 7.06             | 0.39           | 2.60              | 0.98            | 12.80           | 14.87            | 2.97           | 15.16           |
| 44               | 70.50                 | 1.23             | 1.44          | 2.32            | 8.16             | 0.37           | 2.46              | 1.09            | 13.89           | 16.37            | 2.82           | 16.61           |
| 46               | 65.67                 | 1.32             | 1.42          | 2.43            | 9.31             | 0.36           | 2.34              | 1.19            | 15.04           | 17.95            | 2.69           | 18.15           |
| 50               | 58.55                 | 1.42             | 1.41          | 2.51            | 10.84            | 0.35           | 2.15              | 1.32            | 16.63           | 20.11            | 2.52           | 20.27           |

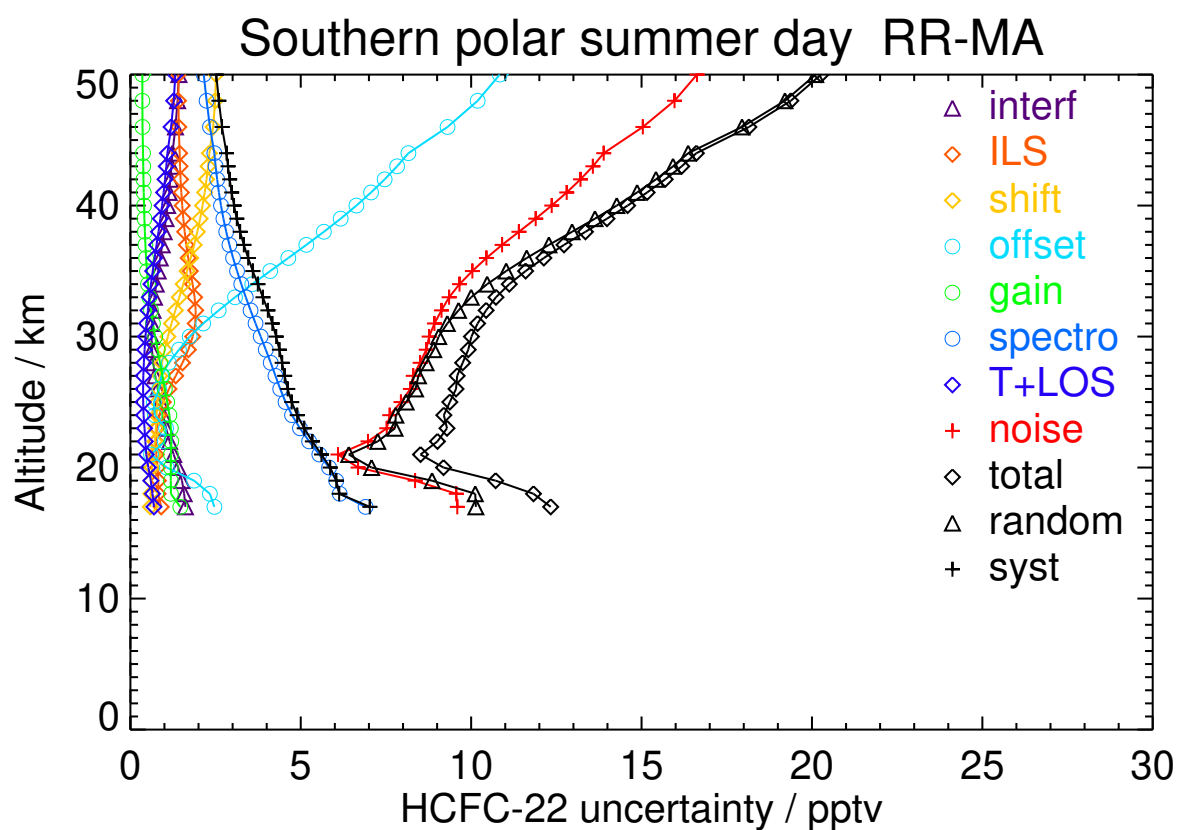

**Figure S99.** V8R\_F-22\_561 Southern polar summer day

**Table S101.** HCFC-22 error budget for Southern polar summer night. All uncertainties are  $1\sigma$ .

| altitude<br>(km) | mean target<br>(pptv) | interf<br>(pptv) | ILS<br>(pptv) | shift<br>(pptv) | offset<br>(pptv) | gain<br>(pptv) | spectro<br>(pptv) | T+LOS<br>(pptv) | noise<br>(pptv) | random<br>(pptv) | syst<br>(pptv) | total<br>(pptv) |
|------------------|-----------------------|------------------|---------------|-----------------|------------------|----------------|-------------------|-----------------|-----------------|------------------|----------------|-----------------|
| 17               | 141.95                | 1.69             | 1.01          | 0.54            | 2.51             | 1.70           | 6.97              | 0.71            | 9.81            | 10.31            | 7.23           | 12.60           |
| 20               | 130.85                | 1.39             | 0.93          | 0.56            | 1.17             | 1.39           | 6.19              | 0.57            | 7.34            | 7.65             | 6.36           | 9.94            |
| 23               | 116.65                | 1.03             | 0.81          | 0.64            | 0.99             | 1.20           | 5.40              | 0.45            | 7.77            | 7.96             | 5.57           | 9.71            |
| 26               | 108.90                | 0.78             | 1.03          | 0.75            | 0.96             | 0.98           | 4.63              | 0.37            | 8.56            | 8.70             | 4.82           | 9.95            |
| 29               | 101.21                | 0.63             | 1.40          | 0.93            | 1.86             | 0.80           | 3.97              | 0.38            | 9.04            | 9.31             | 4.26           | 10.24           |
| 32               | 91.39                 | 0.67             | 1.64          | 1.18            | 3.32             | 0.70           | 3.37              | 0.44            | 9.71            | 10.37            | 3.80           | 11.04           |
| 35               | 82.09                 | 0.82             | 1.66          | 1.44            | 5.02             | 0.66           | 2.91              | 0.55            | 11.00           | 12.22            | 3.39           | 12.68           |
| 38               | 75.39                 | 0.97             | 1.63          | 1.65            | 6.64             | 0.64           | 2.60              | 0.67            | 12.62           | 14.41            | 3.10           | 14.74           |
| 41               | 71.82                 | 1.08             | 1.62          | 1.78            | 7.96             | 0.63           | 2.41              | 0.77            | 14.04           | 16.30            | 2.93           | 16.56           |
| 44               | 69.98                 | 1.15             | 1.62          | 1.85            | 8.93             | 0.62           | 2.30              | 0.85            | 15.01           | 17.63            | 2.84           | 17.86           |
| 46               | 67.98                 | 1.20             | 1.64          | 1.90            | 9.88             | 0.61           | 2.20              | 0.92            | 15.91           | 18.90            | 2.75           | 19.10           |
| 50               | 64.54                 | 1.24             | 1.64          | 1.91            | 11.06            | 0.58           | 2.05              | 0.98            | 16.97           | 20.42            | 2.63           | 20.58           |

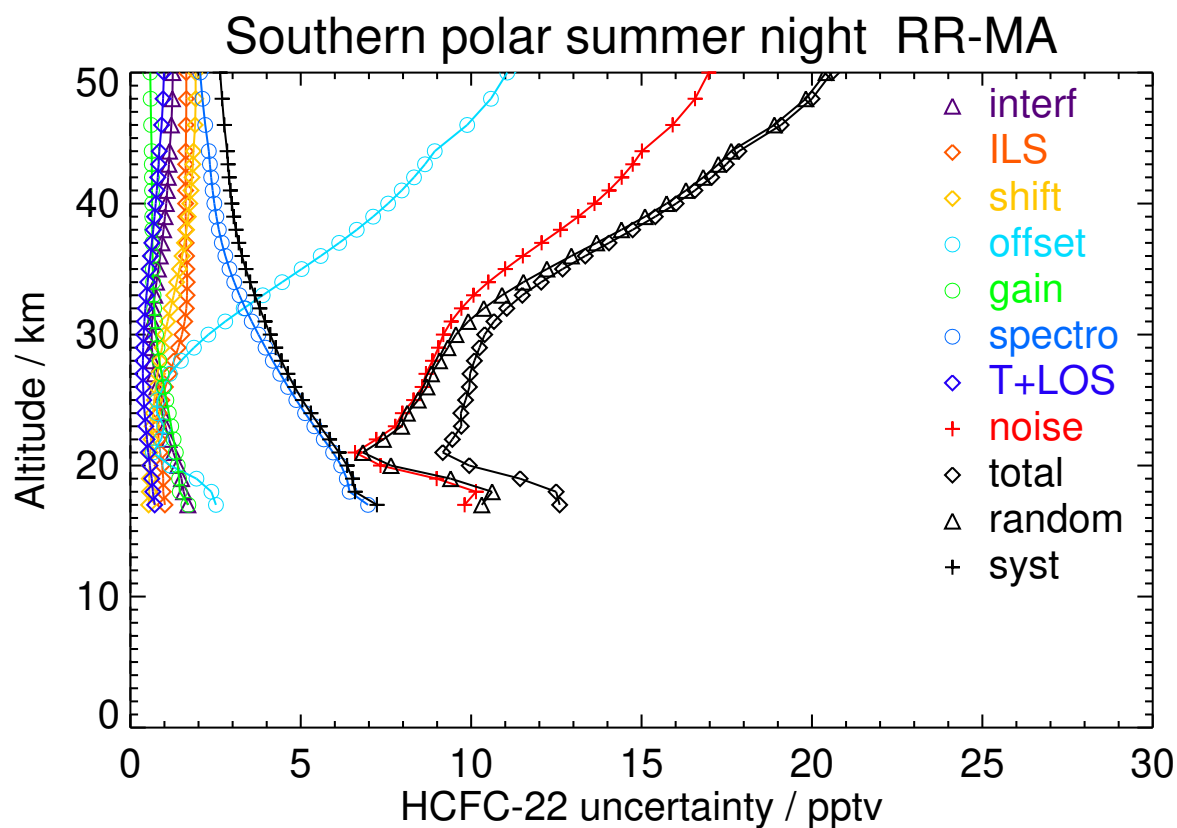

**Figure S100.** V8R\_F-22\_561 Southern polar summer night

**Table S102.** HCFC-22 error budget for Southern polar autumn day. All uncertainties are  $1\sigma$ .

| altitude<br>(km) | mean target<br>(pptv) | interf<br>(pptv) | ILS<br>(pptv) | shift<br>(pptv) | offset<br>(pptv) | gain<br>(pptv) | spectro<br>(pptv) | T+LOS<br>(pptv) | noise<br>(pptv) | random<br>(pptv) | syst<br>(pptv) | total<br>(pptv) |
|------------------|-----------------------|------------------|---------------|-----------------|------------------|----------------|-------------------|-----------------|-----------------|------------------|----------------|-----------------|
| 20               | 125.73                | 1.38             | 1.12          | 0.48            | 1.60             | 1.57           | 6.23              | 0.62            | 8.61            | 8.98             | 6.40           | 11.03           |
| 23               | 113.10                | 1.00             | 1.02          | 0.49            | 1.25             | 1.52           | 5.59              | 0.53            | 8.46            | 8.68             | 5.83           | 10.46           |
| 26               | 99.06                 | 0.77             | 1.06          | 0.53            | 2.06             | 1.36           | 4.78              | 0.43            | 9.59            | 9.89             | 5.03           | 11.09           |
| 29               | 84.84                 | 0.68             | 1.13          | 0.62            | 3.90             | 1.17           | 3.90              | 0.39            | 10.83           | 11.57            | 4.17           | 12.30           |
| 32               | 74.10                 | 0.76             | 1.16          | 0.73            | 5.99             | 1.08           | 3.18              | 0.43            | 12.77           | 14.16            | 3.49           | 14.59           |
| 35               | 66.70                 | 0.88             | 1.16          | 0.83            | 7.81             | 1.06           | 2.70              | 0.51            | 14.73           | 16.74            | 3.05           | 17.01           |
| 38               | 61.11                 | 0.97             | 1.14          | 0.90            | 9.22             | 1.07           | 2.39              | 0.58            | 16.26           | 18.76            | 2.78           | 18.96           |
| 41               | 61.74                 | 1.03             | 1.20          | 1.03            | 9.95             | 1.15           | 2.17              | 0.62            | 16.98           | 19.76            | 2.66           | 19.93           |
| 44               | 55.37                 | 1.05             | 1.15          | 1.01            | 10.73            | 1.10           | 2.05              | 0.68            | 17.65           | 20.73            | 2.50           | 20.88           |
| 46               | 53.29                 | 1.06             | 1.12          | 0.98            | 11.36            | 1.08           | 1.98              | 0.71            | 18.09           | 21.43            | 2.43           | 21.57           |

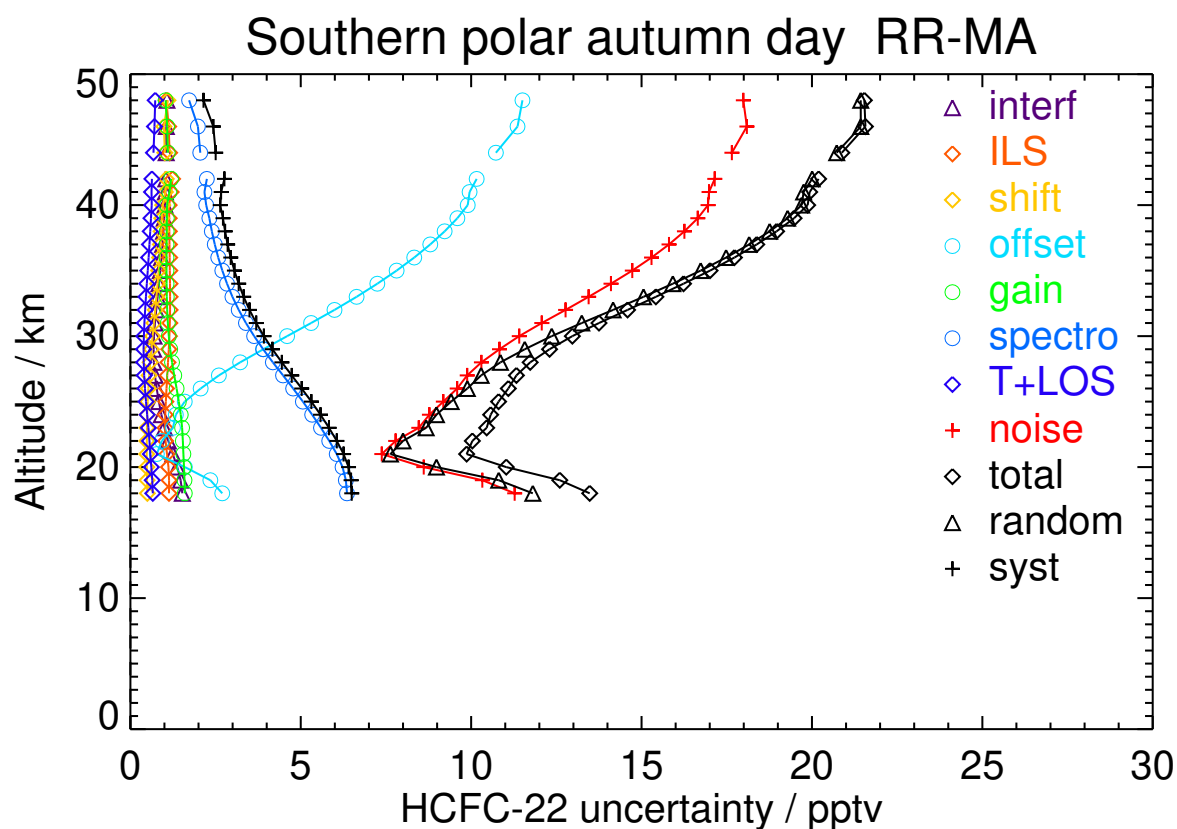

**Figure S101.** V8R\_F-22\_561 Southern polar autumn day

**Table S103.** HCFC-22 error budget for Southern polar autumn night. All uncertainties are  $1\sigma$ .

| altitude<br>(km) | mean target<br>(pptv) | interf<br>(pptv) | ILS<br>(pptv) | shift<br>(pptv) | offset<br>(pptv) | gain<br>(pptv) | spectro<br>(pptv) | T+LOS<br>(pptv) | noise<br>(pptv) | random<br>(pptv) | syst<br>(pptv) | total<br>(pptv) |
|------------------|-----------------------|------------------|---------------|-----------------|------------------|----------------|-------------------|-----------------|-----------------|------------------|----------------|-----------------|
| 20               | 118.32                | 1.36             | 0.93          | 0.44            | 1.66             | 1.27           | 5.65              | 0.56            | 8.98            | 9.35             | 5.73           | 10.96           |
| 23               | 108.76                | 1.00             | 0.91          | 0.43            | 1.31             | 1.14           | 5.25              | 0.51            | 8.60            | 8.82             | 5.39           | 10.34           |
| 26               | 96.23                 | 0.78             | 1.02          | 0.47            | 2.29             | 1.03           | 4.63              | 0.43            | 9.81            | 10.15            | 4.81           | 11.23           |
| 29               | 82.82                 | 0.69             | 1.16          | 0.57            | 4.24             | 0.97           | 3.86              | 0.41            | 11.24           | 12.06            | 4.11           | 12.75           |
| 32               | 70.29                 | 0.77             | 1.25          | 0.68            | 6.36             | 0.96           | 3.18              | 0.45            | 13.27           | 14.77            | 3.50           | 15.18           |
| 35               | 60.91                 | 0.89             | 1.28          | 0.79            | 8.17             | 0.97           | 2.69              | 0.52            | 15.21           | 17.32            | 3.08           | 17.60           |
| 38               | 55.00                 | 0.98             | 1.28          | 0.86            | 9.54             | 0.99           | 2.37              | 0.59            | 16.68           | 19.28            | 2.81           | 19.49           |
| 41               | 53.42                 | 1.06             | 1.47          | 1.06            | 10.04            | 1.02           | 2.20              | 0.62            | 17.15           | 19.95            | 2.76           | 20.14           |
| 44               | 54.19                 | 1.07             | 1.44          | 1.05            | 10.77            | 1.04           | 2.10              | 0.65            | 17.76           | 20.85            | 2.68           | 21.02           |
| 46               | 48.73                 | 1.06             | 1.31          | 0.96            | 11.55            | 1.02           | 1.94              | 0.70            | 18.33           | 21.73            | 2.49           | 21.87           |

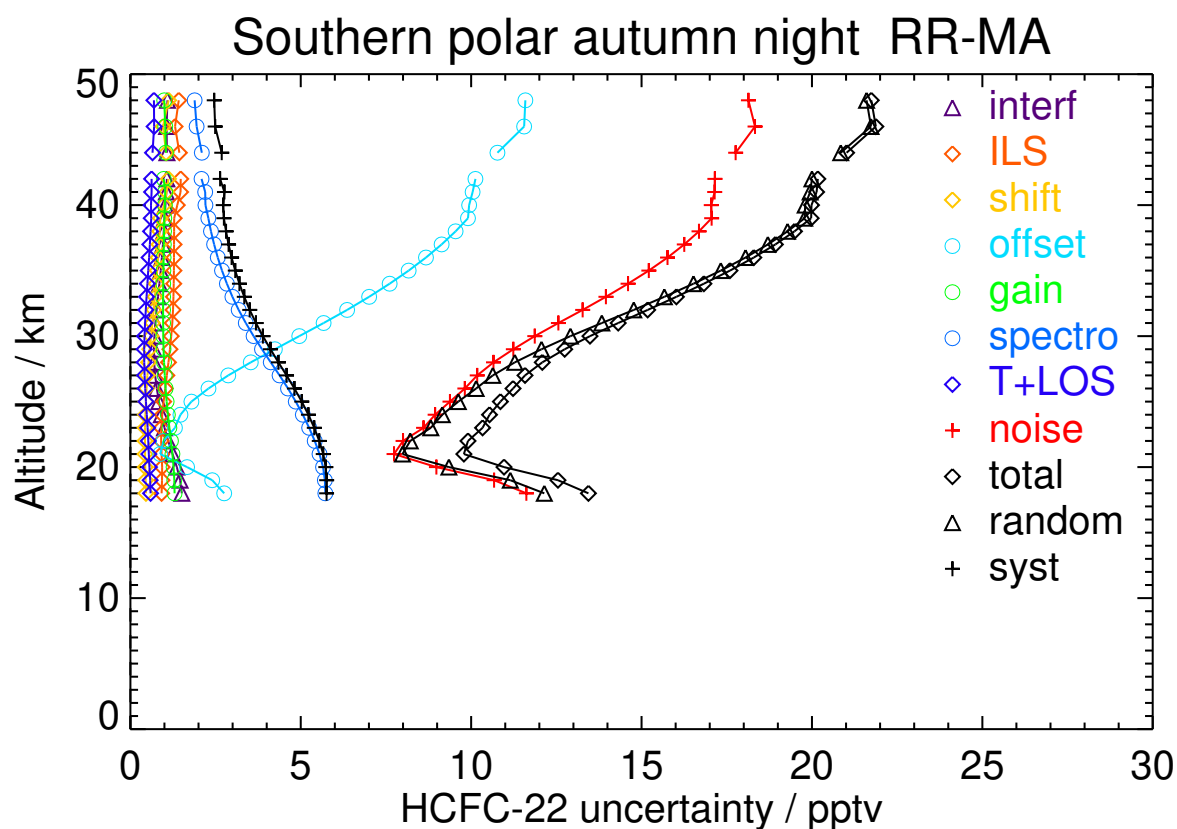

**Figure S102.** V8R\_F-22\_561 Southern polar autumn night
