# Supplementary material for: Version 8 IMK/IAA MIPAS measurements of CFC-11, CFC-12, and HCFC-22
Source: Copernicus journal article supplement (doi:10.5194/amt-17-1759-2024), 2024-03-27
Supplement: Supplementary file 4 [file amt-17-1759-2024-supplement.zip]

Archive with 4 entries (4 files):
- S1.pdf
- S2.pdf
- amt-17-1759-2024-supplement-title-page.pdf
- S3.pdf
