# Supplementary material for: Version 8 IMK/IAA MIPAS measurements of CFC-11, CFC-12, and HCFC-22
Source: Copernicus journal article supplement (doi:10.5194/amt-17-1759-2024), 2024-03-27
Supplement: Supplementary file 4 [file amt-17-1759-2024-supplement.zip › S1.pdf]

This document serves as reference for the definitions of the representative atmospheres used for the calculation of CFC-12 error budgets, as listed in Tab. S1, and as collection of the respective error budgets for FR data (2002-2004), which are listed in tables S2–S35 and depicted in figures S1–S34, and the respective error budgets for RR data (2005-2012) in the MIPAS nominal measurement mode, which are listed in tables S36–S69 and depicted in figures S35–S68, and in the MIPAS middle atmosphere measurement mode, which are listed in tables S70–S103 and depicted in figures S69–S102.

The errors are presented as absolute errors in pptv.

**Table S1.** Labels and definitions of the representative atmospheric conditions which were used to calculate the error budget for FR and RR nominal measurement mode data ( $\beta_{\max} = 95^\circ$ ) and RR middle atmosphere measurement mode data ( $\beta_{\max} = 98^\circ$ ).

| representative atmosphere label   | month(s) used | latitude range                        | solar zenith angle range |
|-----------------------------------|---------------|---------------------------------------|--------------------------|
| Northern polar winter day         | Jan, Feb      | $65^\circ\text{N} - 90^\circ\text{N}$ | $< 90^\circ$             |
| Northern polar winter night       | Jan, Feb      | $65^\circ\text{N} - 90^\circ\text{N}$ | $> \beta_{\max}$         |
| Northern polar spring day         | Apr           | $65^\circ\text{N} - 90^\circ\text{N}$ | $< 90^\circ$             |
| Northern polar spring night       | Apr           | $65^\circ\text{N} - 90^\circ\text{N}$ | $> \beta_{\max}$         |
| Northern polar summer day         | Jul, Aug      | $65^\circ\text{N} - 90^\circ\text{N}$ | $< 90^\circ$             |
| Northern polar summer night       | Jul, Aug      | $65^\circ\text{N} - 90^\circ\text{N}$ | $> \beta_{\max}$         |
| Northern polar autumn day         | Oct           | $65^\circ\text{N} - 90^\circ\text{N}$ | $< 90^\circ$             |
| Northern polar autumn night       | Oct           | $65^\circ\text{N} - 90^\circ\text{N}$ | $> \beta_{\max}$         |
| Northern midlatitude winter day   | Jan, Feb      | $40^\circ\text{N} - 60^\circ\text{N}$ | $< 90^\circ$             |
| Northern midlatitude winter night | Jan, Feb      | $40^\circ\text{N} - 60^\circ\text{N}$ | $> \beta_{\max}$         |
| Northern midlatitude spring day   | Apr           | $40^\circ\text{N} - 60^\circ\text{N}$ | $< 90^\circ$             |
| Northern midlatitude spring night | Apr           | $40^\circ\text{N} - 60^\circ\text{N}$ | $> \beta_{\max}$         |
| Northern midlatitude summer day   | Jul, Aug      | $40^\circ\text{N} - 60^\circ\text{N}$ | $< 90^\circ$             |
| Northern midlatitude summer night | Jul, Aug      | $40^\circ\text{N} - 60^\circ\text{N}$ | $> \beta_{\max}$         |
| Northern midlatitude autumn day   | Oct           | $40^\circ\text{N} - 60^\circ\text{N}$ | $< 90^\circ$             |
| Northern midlatitude autumn night | Oct           | $40^\circ\text{N} - 60^\circ\text{N}$ | $> \beta_{\max}$         |
| Tropics day                       | Apr           | $20^\circ\text{S} - 20^\circ\text{N}$ | $< 90^\circ$             |
| Tropics night                     | Apr           | $20^\circ\text{S} - 20^\circ\text{N}$ | $> \beta_{\max}$         |
| Southern midlatitude winter day   | Jul, Aug      | $40^\circ\text{S} - 60^\circ\text{S}$ | $< 90^\circ$             |
| Southern midlatitude winter night | Jul, Aug      | $40^\circ\text{S} - 60^\circ\text{S}$ | $> \beta_{\max}$         |
| Southern midlatitude spring day   | Oct           | $40^\circ\text{S} - 60^\circ\text{S}$ | $< 90^\circ$             |
| Southern midlatitude spring night | Oct           | $40^\circ\text{S} - 60^\circ\text{S}$ | $> \beta_{\max}$         |
| Southern midlatitude summer day   | Jan, Feb      | $40^\circ\text{S} - 60^\circ\text{S}$ | $< 90^\circ$             |
| Southern midlatitude summer night | Jan, Feb      | $40^\circ\text{S} - 60^\circ\text{S}$ | $> \beta_{\max}$         |
| Southern midlatitude autumn day   | Apr           | $40^\circ\text{S} - 60^\circ\text{S}$ | $< 90^\circ$             |
| Southern midlatitude autumn night | Apr           | $40^\circ\text{S} - 60^\circ\text{S}$ | $> \beta_{\max}$         |
| Southern polar winter day         | Jul, Aug      | $65^\circ\text{S} - 90^\circ\text{S}$ | $< 90^\circ$             |
| Southern polar winter night       | Jul, Aug      | $65^\circ\text{S} - 90^\circ\text{S}$ | $> \beta_{\max}$         |
| Southern polar spring day         | Oct           | $65^\circ\text{S} - 90^\circ\text{S}$ | $< 90^\circ$             |
| Southern polar spring night       | Oct           | $65^\circ\text{S} - 90^\circ\text{S}$ | $> \beta_{\max}$         |
| Southern polar summer day         | Jan, Feb      | $65^\circ\text{S} - 90^\circ\text{S}$ | $< 90^\circ$             |
| Southern polar summer night       | Jan, Feb      | $65^\circ\text{S} - 90^\circ\text{S}$ | $> \beta_{\max}$         |
| Southern polar autumn day         | Apr           | $65^\circ\text{S} - 90^\circ\text{S}$ | $< 90^\circ$             |
| Southern polar autumn night       | Apr           | $65^\circ\text{S} - 90^\circ\text{S}$ | $> \beta_{\max}$         |

**Table S2.** CFC-12 error budget for Northern polar winter day. All uncertainties are  $1\sigma$ .

| altitude<br>(km) | mean target<br>(pptv) | interf<br>(pptv) | ILS<br>(pptv) | shift<br>(pptv) | offset<br>(pptv) | gain<br>(pptv) | spectro<br>(pptv) | T+LOS<br>(pptv) | noise<br>(pptv) | random<br>(pptv) | syst<br>(pptv) | total<br>(pptv) |
|------------------|-----------------------|------------------|---------------|-----------------|------------------|----------------|-------------------|-----------------|-----------------|------------------|----------------|-----------------|
| 5                | 558.46                | 4.48             | 1.90          | 0.43            | 10.31            | 6.21           | 27.98             | 8.77            | 18.54           | 25.62            | 26.76          | 37.04           |
| 8                | 541.02                | 3.14             | 3.14          | 0.49            | 8.45             | 5.55           | 26.60             | 8.62            | 16.19           | 23.02            | 25.21          | 34.14           |
| 11               | 511.23                | 1.19             | 3.56          | 0.32            | 5.91             | 7.01           | 23.22             | 7.35            | 12.48           | 17.74            | 23.07          | 29.10           |
| 14               | 431.19                | 0.45             | 7.61          | 0.90            | 4.47             | 6.24           | 32.82             | 8.20            | 10.86           | 18.93            | 31.96          | 37.15           |
| 17               | 298.19                | 0.62             | 9.93          | 1.32            | 4.21             | 4.73           | 27.74             | 6.48            | 11.39           | 16.78            | 28.30          | 32.90           |
| 20               | 164.41                | 0.52             | 5.41          | 0.62            | 4.31             | 3.00           | 18.73             | 3.58            | 13.55           | 18.53            | 16.17          | 24.59           |
| 23               | 120.91                | 0.58             | 1.26          | 0.24            | 4.67             | 1.84           | 11.01             | 1.84            | 16.98           | 19.43            | 7.91           | 20.97           |
| 26               | 93.49                 | 0.61             | 1.39          | 0.15            | 5.34             | 1.29           | 9.56              | 1.17            | 20.72           | 22.44            | 7.14           | 23.55           |
| 29               | 73.17                 | 0.68             | 1.25          | 0.10            | 9.79             | 1.02           | 7.60              | 0.95            | 25.17           | 27.60            | 5.42           | 28.13           |
| 32               | 46.36                 | 0.32             | 0.79          | 0.16            | 9.96             | 0.51           | 5.55              | 0.73            | 27.03           | 29.08            | 4.05           | 29.36           |
| 35               | 8.92                  | 0.09             | 0.54          | 0.27            | 4.87             | 0.52           | 3.57              | 0.63            | 27.90           | 28.45            | 2.56           | 28.56           |
| 38               | -3.75                 | 0.10             | 0.35          | 0.21            | 5.69             | 0.47           | 2.02              | 0.52            | 32.61           | 33.15            | 1.28           | 33.17           |
| 41               | -0.21                 | 0.09             | 0.24          | 0.19            | 9.50             | 0.46           | 1.52              | 0.45            | 35.93           | 37.19            | 0.99           | 37.20           |

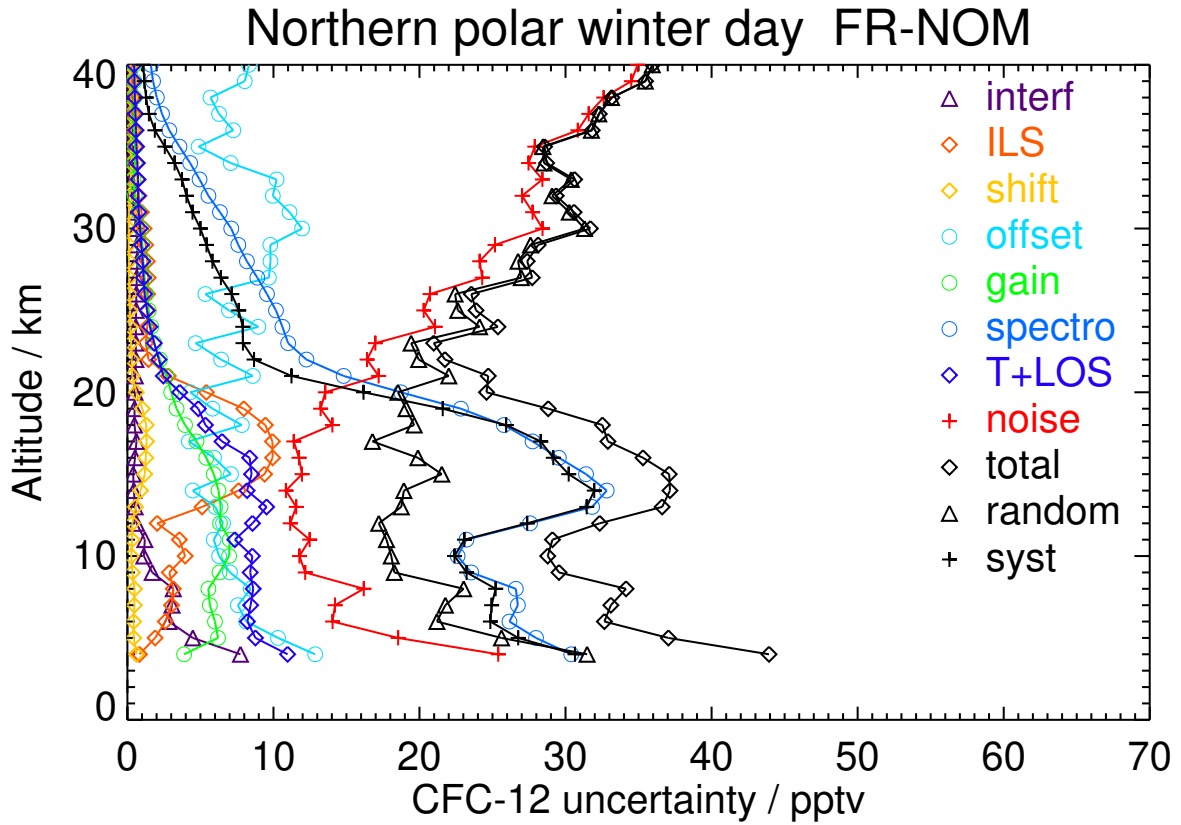

**Figure S1.** V8H\_F-12\_61 Northern polar winter day

**Table S3.** CFC-12 error budget for Northern polar winter night. All uncertainties are  $1\sigma$ .

| altitude<br>(km) | mean target<br>(pptv) | interf<br>(pptv) | ILS<br>(pptv) | shift<br>(pptv) | offset<br>(pptv) | gain<br>(pptv) | spectro<br>(pptv) | T+LOS<br>(pptv) | noise<br>(pptv) | random<br>(pptv) | syst<br>(pptv) | total<br>(pptv) |
|------------------|-----------------------|------------------|---------------|-----------------|------------------|----------------|-------------------|-----------------|-----------------|------------------|----------------|-----------------|
| 5                | 546.97                | 5.19             | 2.84          | 0.42            | 10.99            | 4.93           | 28.52             | 9.46            | 19.71           | 27.72            | 26.53          | 38.37           |
| 8                | 539.48                | 1.59             | 3.74          | 0.32            | 6.35             | 6.82           | 23.56             | 7.09            | 12.99           | 17.35            | 24.01          | 29.62           |
| 11               | 513.18                | 1.01             | 1.96          | 0.17            | 5.18             | 6.86           | 25.02             | 7.78            | 12.13           | 16.48            | 25.31          | 30.21           |
| 14               | 426.35                | 0.46             | 8.23          | 0.93            | 4.11             | 6.95           | 33.46             | 8.76            | 11.35           | 17.34            | 34.04          | 38.20           |
| 17               | 269.72                | 0.58             | 9.90          | 0.85            | 3.46             | 4.23           | 27.87             | 7.35            | 11.68           | 16.99            | 28.42          | 33.11           |
| 20               | 132.50                | 0.43             | 5.56          | 0.70            | 3.05             | 2.32           | 17.83             | 4.02            | 13.64           | 17.14            | 16.51          | 23.80           |
| 23               | 82.30                 | 0.61             | 1.79          | 0.28            | 3.62             | 1.68           | 10.88             | 1.92            | 17.14           | 20.04            | 5.81           | 20.86           |
| 26               | 77.68                 | 0.69             | 1.43          | 0.20            | 4.96             | 1.11           | 7.65              | 1.14            | 20.80           | 22.31            | 4.80           | 22.82           |
| 29               | 50.46                 | 0.81             | 1.26          | 0.15            | 9.56             | 0.74           | 6.62              | 0.97            | 24.27           | 26.62            | 4.36           | 26.98           |
| 32               | 15.80                 | 0.45             | 0.60          | 0.12            | 9.33             | 0.34           | 3.27              | 0.68            | 26.06           | 27.82            | 2.03           | 27.90           |
| 35               | -3.46                 | 0.10             | 0.38          | 0.23            | 4.44             | 0.59           | 2.05              | 0.50            | 26.25           | 26.70            | 0.91           | 26.71           |
| 38               | 4.91                  | 0.12             | 0.21          | 0.20            | 4.82             | 0.49           | 1.38              | 0.41            | 31.10           | 31.50            | 0.82           | 31.51           |
| 41               | 6.63                  | 0.11             | 0.31          | 0.18            | 7.62             | 0.41           | 1.81              | 0.35            | 34.13           | 35.00            | 1.12           | 35.02           |

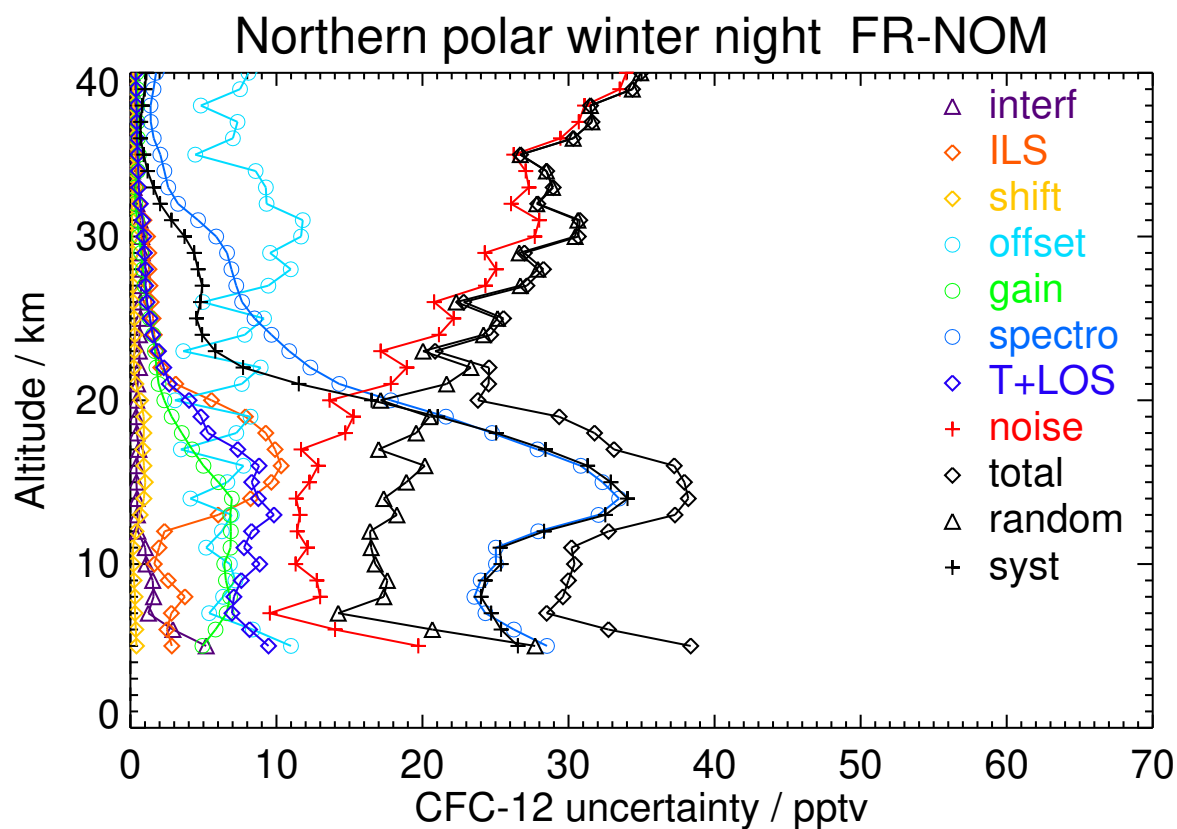

**Figure S2.** V8H\_F-12\_61 Northern polar winter night

**Table S4.** CFC-12 error budget for Northern polar spring day. All uncertainties are  $1\sigma$ .

| altitude<br>(km) | mean target<br>(pptv) | interf<br>(pptv) | ILS<br>(pptv) | shift<br>(pptv) | offset<br>(pptv) | gain<br>(pptv) | spectro<br>(pptv) | T+LOS<br>(pptv) | noise<br>(pptv) | random<br>(pptv) | syst<br>(pptv) | total<br>(pptv) |
|------------------|-----------------------|------------------|---------------|-----------------|------------------|----------------|-------------------|-----------------|-----------------|------------------|----------------|-----------------|
| 8                | 534.57                | 2.46             | 1.79          | 0.46            | 7.41             | 5.16           | 24.71             | 7.74            | 11.86           | 17.58            | 24.36          | 30.04           |
| 11               | 481.95                | 0.95             | 1.70          | 0.27            | 6.77             | 6.79           | 27.41             | 7.74            | 10.07           | 15.83            | 27.53          | 31.76           |
| 14               | 370.88                | 0.46             | 8.66          | 0.70            | 6.92             | 6.54           | 33.09             | 8.12            | 9.60            | 16.65            | 33.80          | 37.68           |
| 17               | 181.60                | 0.64             | 8.72          | 1.03            | 7.59             | 3.66           | 21.34             | 5.00            | 10.80           | 17.17            | 21.23          | 27.30           |
| 20               | 142.00                | 0.61             | 3.23          | 0.51            | 8.75             | 1.88           | 10.29             | 1.94            | 13.55           | 18.02            | 7.73           | 19.61           |
| 23               | 122.73                | 0.65             | 1.74          | 0.36            | 10.00            | 2.02           | 10.51             | 1.60            | 17.02           | 20.86            | 8.68           | 22.59           |
| 26               | 95.01                 | 0.65             | 1.71          | 0.17            | 10.76            | 1.89           | 8.75              | 1.14            | 21.00           | 24.31            | 7.12           | 25.33           |
| 29               | 66.66                 | 0.83             | 1.29          | 0.15            | 12.30            | 0.88           | 6.50              | 0.95            | 24.46           | 27.74            | 5.16           | 28.21           |
| 32               | 45.87                 | 0.26             | 0.68          | 0.21            | 10.42            | 0.54           | 4.45              | 0.61            | 24.53           | 26.82            | 3.48           | 27.04           |
| 35               | 23.66                 | 0.11             | 0.49          | 0.27            | 8.66             | 0.50           | 3.06              | 0.50            | 27.01           | 28.45            | 2.32           | 28.54           |
| 38               | 8.93                  | 0.12             | 0.39          | 0.28            | 8.32             | 0.63           | 2.32              | 0.40            | 30.41           | 31.57            | 1.90           | 31.62           |
| 41               | -4.54                 | 0.12             | 0.26          | 0.22            | 8.65             | 0.56           | 1.68              | 0.36            | 32.25           | 33.42            | 1.33           | 33.45           |

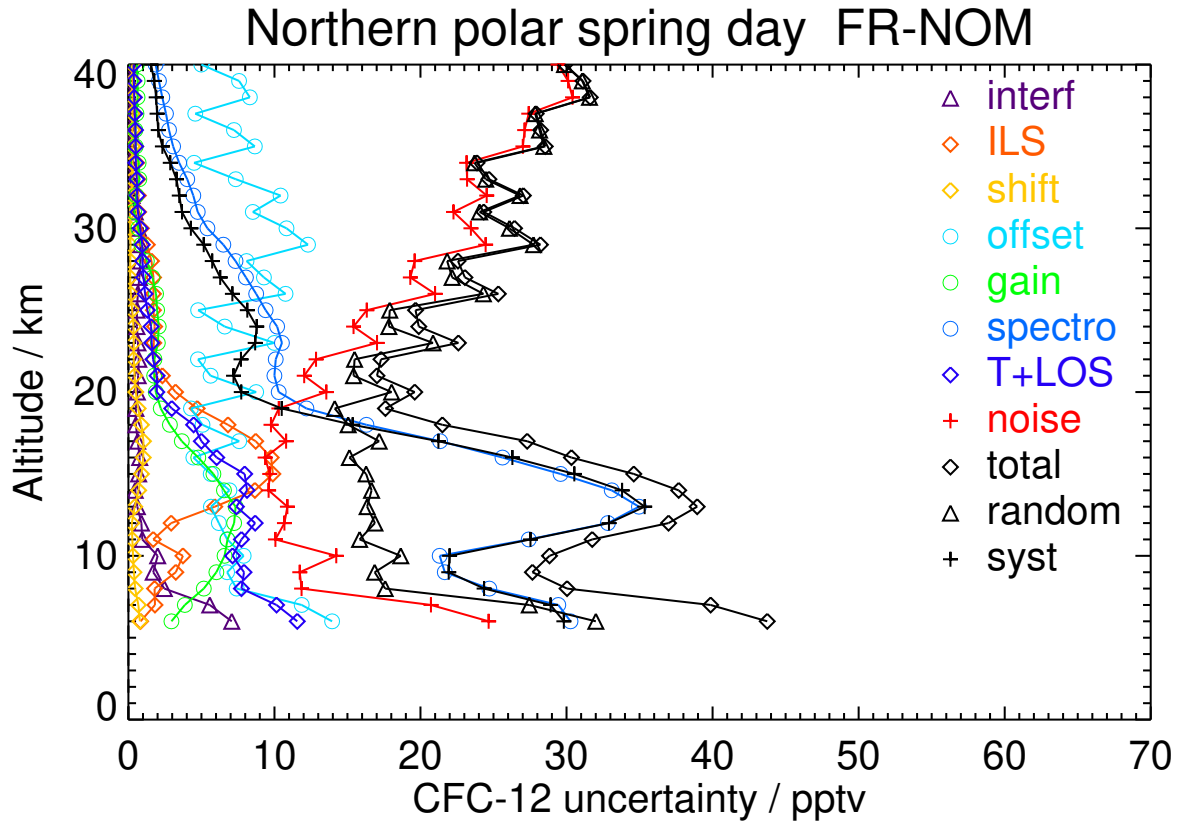

**Figure S3.** V8H\_F-12\_61 Northern polar spring day

**Table S5.** CFC-12 error budget for Northern polar spring night. All uncertainties are  $1\sigma$ .

| altitude<br>(km) | mean target<br>(pptv) | interf<br>(pptv) | ILS<br>(pptv) | shift<br>(pptv) | offset<br>(pptv) | gain<br>(pptv) | spectro<br>(pptv) | T+LOS<br>(pptv) | noise<br>(pptv) | random<br>(pptv) | syst<br>(pptv) | total<br>(pptv) |
|------------------|-----------------------|------------------|---------------|-----------------|------------------|----------------|-------------------|-----------------|-----------------|------------------|----------------|-----------------|
| 8                | 539.65                | 3.19             | 3.23          | 0.59            | 8.54             | 5.07           | 27.93             | 8.69            | 13.98           | 21.35            | 26.73          | 34.21           |
| 11               | 475.71                | 1.10             | 2.46          | 0.30            | 6.91             | 6.72           | 27.62             | 7.38            | 10.49           | 17.61            | 26.79          | 32.06           |
| 14               | 377.90                | 0.46             | 8.17          | 0.96            | 6.73             | 5.84           | 31.80             | 7.56            | 9.66            | 17.49            | 31.67          | 36.18           |
| 17               | 223.25                | 0.69             | 9.18          | 1.32            | 7.40             | 3.60           | 24.26             | 5.17            | 10.97           | 18.12            | 23.70          | 29.83           |
| 20               | 152.89                | 0.57             | 3.85          | 0.54            | 8.53             | 2.52           | 13.64             | 2.32            | 13.76           | 19.16            | 10.40          | 21.80           |
| 23               | 132.44                | 0.65             | 1.39          | 0.29            | 9.71             | 1.92           | 10.63             | 1.62            | 17.45           | 21.37            | 7.99           | 22.81           |
| 26               | 114.01                | 0.62             | 1.22          | 0.20            | 10.40            | 1.60           | 10.15             | 1.26            | 21.37           | 24.58            | 8.34           | 25.96           |
| 29               | 73.53                 | 0.78             | 1.63          | 0.15            | 12.19            | 1.11           | 8.34              | 1.09            | 25.15           | 28.45            | 6.88           | 29.27           |
| 32               | 33.24                 | 0.30             | 0.65          | 0.18            | 10.50            | 0.33           | 3.84              | 0.65            | 25.57           | 27.75            | 3.15           | 27.93           |
| 35               | 18.65                 | 0.11             | 0.34          | 0.26            | 7.95             | 0.48           | 2.30              | 0.58            | 27.45           | 28.63            | 1.64           | 28.68           |
| 38               | 9.35                  | 0.12             | 0.35          | 0.29            | 7.82             | 0.64           | 2.15              | 0.45            | 30.97           | 31.98            | 1.66           | 32.03           |
| 41               | 8.05                  | 0.11             | 0.25          | 0.25            | 8.18             | 0.56           | 1.73              | 0.40            | 32.62           | 33.65            | 1.50           | 33.68           |

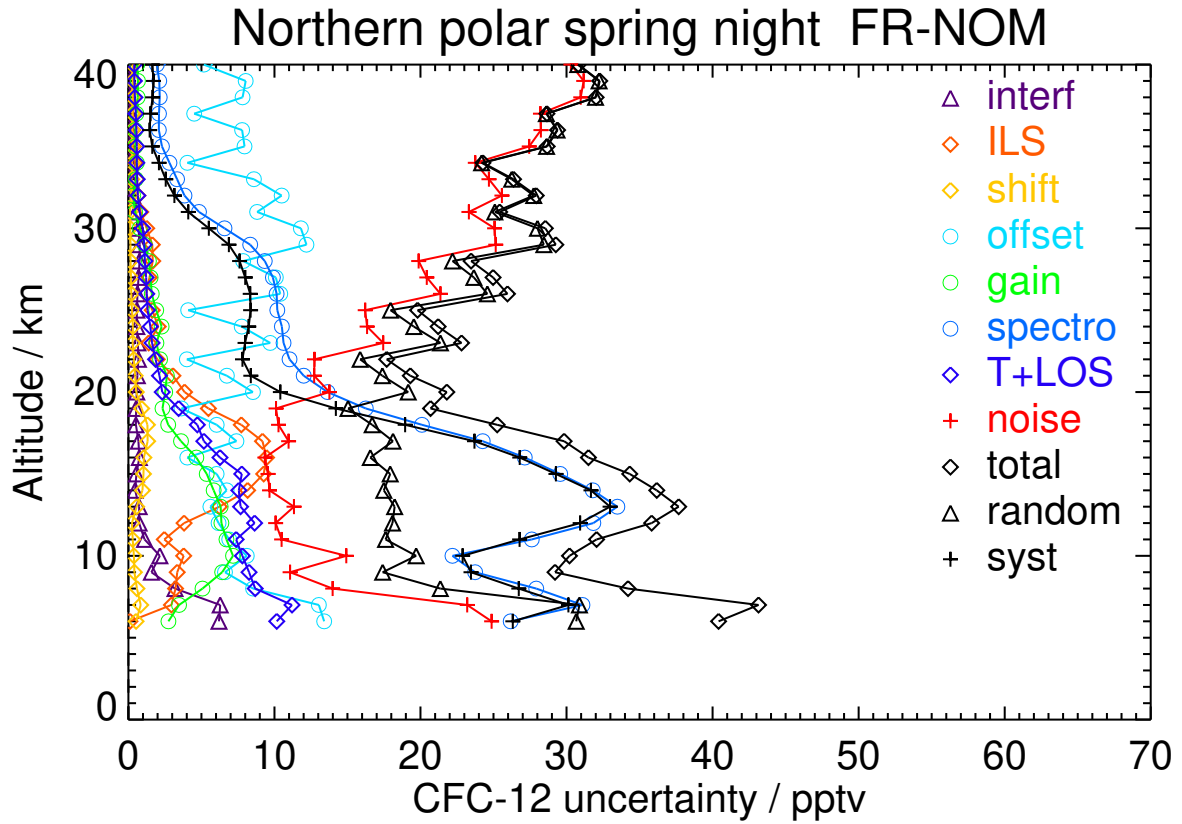

**Figure S4.** V8H\_F-12\_61 Northern polar spring night

**Table S6.** CFC-12 error budget for Northern polar summer day. All uncertainties are  $1\sigma$ .

| altitude<br>(km) | mean target<br>(pptv) | interf<br>(pptv) | ILS<br>(pptv) | shift<br>(pptv) | offset<br>(pptv) | gain<br>(pptv) | spectro<br>(pptv) | T+LOS<br>(pptv) | noise<br>(pptv) | random<br>(pptv) | syst<br>(pptv) | total<br>(pptv) |
|------------------|-----------------------|------------------|---------------|-----------------|------------------|----------------|-------------------|-----------------|-----------------|------------------|----------------|-----------------|
| 8                | 540.70                | 6.08             | 2.72          | 0.68            | 11.42            | 4.20           | 28.39             | 10.41           | 20.90           | 27.93            | 27.65          | 39.30           |
| 11               | 512.79                | 2.44             | 4.38          | 0.35            | 6.73             | 6.20           | 22.30             | 7.05            | 13.38           | 17.73            | 22.82          | 28.89           |
| 14               | 477.86                | 0.70             | 2.97          | 0.54            | 4.91             | 6.06           | 28.19             | 7.05            | 10.78           | 15.18            | 28.29          | 32.11           |
| 17               | 409.80                | 1.02             | 8.50          | 1.50            | 3.92             | 6.30           | 28.82             | 6.60            | 9.62            | 13.07            | 30.44          | 33.13           |
| 20               | 282.19                | 0.49             | 6.94          | 0.82            | 3.36             | 4.02           | 23.68             | 4.42            | 10.57           | 12.76            | 24.61          | 27.72           |
| 23               | 197.92                | 0.78             | 0.83          | 0.92            | 3.69             | 3.03           | 14.47             | 2.73            | 13.15           | 14.27            | 14.52          | 20.36           |
| 26               | 133.52                | 0.59             | 2.19          | 0.19            | 4.08             | 1.76           | 11.08             | 1.94            | 16.96           | 17.74            | 11.15          | 20.95           |
| 29               | 79.49                 | 0.82             | 1.33          | 0.09            | 7.84             | 0.72           | 7.70              | 1.31            | 20.30           | 21.95            | 7.47           | 23.19           |
| 32               | 38.28                 | 0.47             | 0.70          | 0.11            | 8.42             | 0.25           | 4.15              | 0.67            | 22.99           | 24.58            | 3.70           | 24.85           |
| 35               | 10.29                 | 0.10             | 0.32          | 0.34            | 3.92             | 0.57           | 1.98              | 0.46            | 22.88           | 23.27            | 1.38           | 23.31           |
| 38               | 5.49                  | 0.13             | 0.32          | 0.32            | 4.32             | 0.71           | 1.74              | 0.41            | 27.23           | 27.61            | 1.32           | 27.64           |
| 41               | -8.52                 | 0.13             | 0.26          | 0.19            | 4.75             | 0.64           | 1.71              | 0.37            | 28.40           | 28.82            | 1.49           | 28.86           |

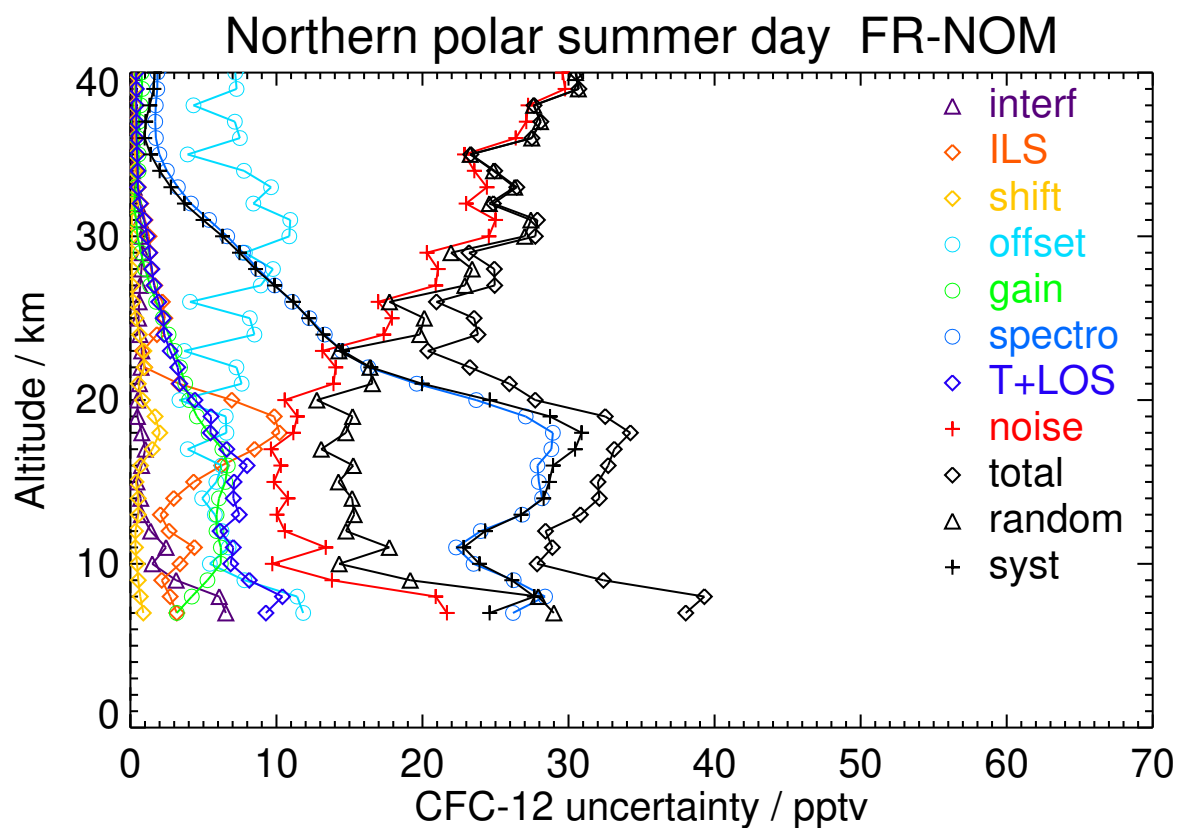

**Figure S5.** V8H\_F-12\_61 Northern polar summer day

**Table S7.** CFC-12 error budget for Northern polar summer night. All uncertainties are  $1\sigma$ .

| altitude<br>(km) | mean target<br>(pptv) | interf<br>(pptv) | ILS<br>(pptv) | shift<br>(pptv) | offset<br>(pptv) | gain<br>(pptv) | spectro<br>(pptv) | T+LOS<br>(pptv) | noise<br>(pptv) | random<br>(pptv) | syst<br>(pptv) | total<br>(pptv) |
|------------------|-----------------------|------------------|---------------|-----------------|------------------|----------------|-------------------|-----------------|-----------------|------------------|----------------|-----------------|
| 8                | 540.95                | 6.19             | 2.91          | 0.59            | 12.81            | 4.06           | 31.22             | 11.17           | 23.77           | 30.99            | 30.53          | 43.50           |
| 11               | 519.07                | 2.14             | 4.44          | 0.19            | 6.31             | 6.91           | 20.75             | 7.64            | 13.29           | 17.50            | 21.70          | 27.88           |
| 14               | 490.07                | 0.68             | 1.93          | 0.26            | 4.82             | 4.70           | 26.95             | 7.92            | 11.14           | 15.43            | 26.92          | 31.03           |
| 17               | 427.47                | 0.98             | 8.42          | 0.97            | 3.66             | 7.01           | 29.32             | 7.26            | 9.81            | 13.39            | 31.06          | 33.82           |
| 20               | 279.59                | 0.47             | 9.16          | 0.97            | 2.69             | 4.32           | 25.14             | 5.14            | 10.59           | 12.73            | 26.83          | 29.69           |
| 23               | 197.00                | 0.72             | 0.83          | 0.91            | 2.81             | 2.94           | 13.94             | 2.90            | 13.08           | 13.95            | 14.05          | 19.80           |
| 26               | 137.71                | 0.59             | 2.15          | 0.39            | 3.29             | 1.97           | 11.70             | 2.07            | 16.90           | 17.49            | 11.87          | 21.13           |
| 29               | 75.77                 | 0.76             | 1.53          | 0.12            | 7.64             | 0.74           | 8.25              | 1.46            | 20.63           | 22.12            | 8.25           | 23.61           |
| 32               | 21.04                 | 0.47             | 0.56          | 0.06            | 8.69             | 0.25           | 3.33              | 0.67            | 23.88           | 25.48            | 2.91           | 25.65           |
| 35               | 6.66                  | 0.11             | 0.28          | 0.33            | 3.34             | 0.63           | 1.75              | 0.46            | 23.33           | 23.62            | 1.20           | 23.65           |
| 38               | -1.88                 | 0.12             | 0.24          | 0.34            | 3.67             | 0.62           | 1.54              | 0.49            | 27.54           | 27.81            | 1.24           | 27.84           |
| 41               | -0.37                 | 0.13             | 0.26          | 0.17            | 4.46             | 0.73           | 1.53              | 0.44            | 29.23           | 29.59            | 1.40           | 29.62           |

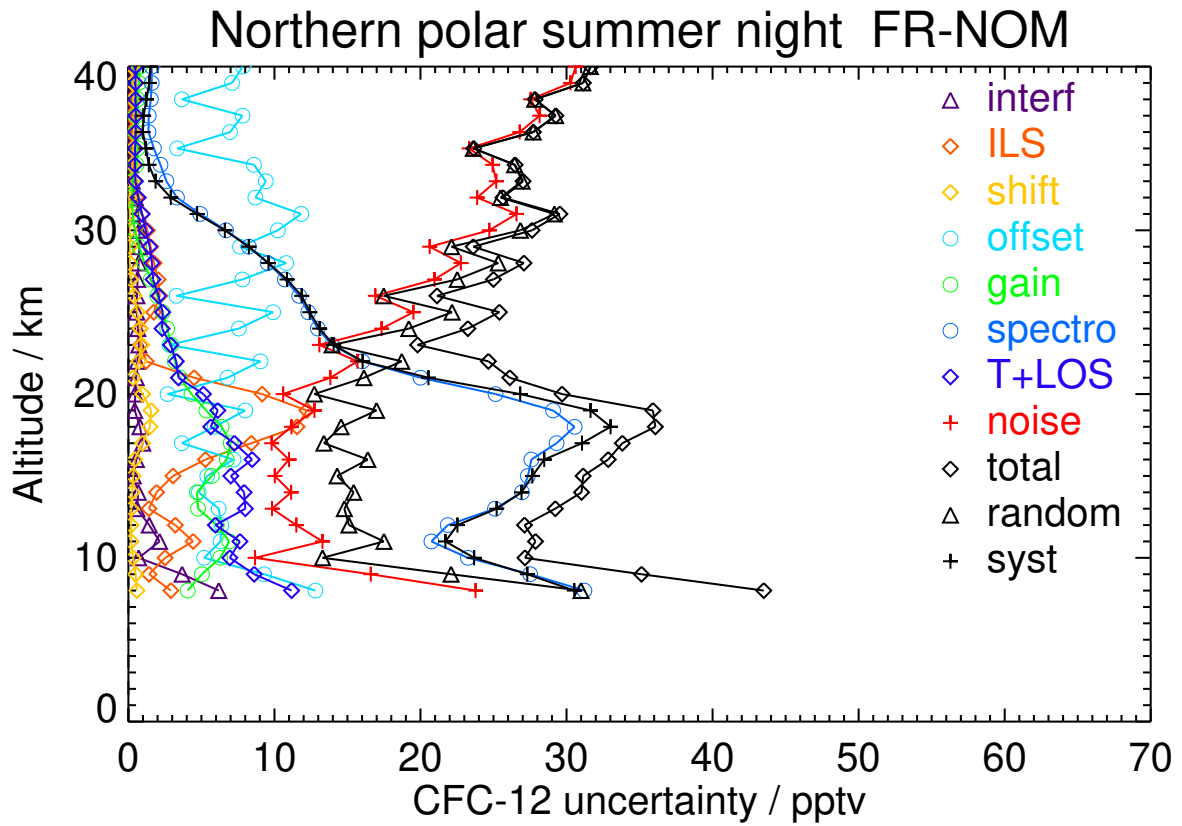

**Figure S6.** V8H\_F-12\_61 Northern polar summer night

**Table S8.** CFC-12 error budget for Northern polar autumn day. All uncertainties are  $1\sigma$ .

| altitude<br>(km) | mean target<br>(pptv) | interf<br>(pptv) | ILS<br>(pptv) | shift<br>(pptv) | offset<br>(pptv) | gain<br>(pptv) | spectro<br>(pptv) | T+LOS<br>(pptv) | noise<br>(pptv) | random<br>(pptv) | syst<br>(pptv) | total<br>(pptv) |
|------------------|-----------------------|------------------|---------------|-----------------|------------------|----------------|-------------------|-----------------|-----------------|------------------|----------------|-----------------|
| 8                | 541.50                | 1.93             | 3.05          | 0.42            | 5.61             | 5.25           | 24.07             | 6.47            | 9.38            | 13.99            | 24.20          | 27.95           |
| 11               | 530.47                | 0.96             | 2.73          | 0.24            | 6.52             | 6.24           | 24.91             | 7.46            | 9.90            | 15.08            | 25.23          | 29.39           |
| 14               | 481.45                | 0.41             | 2.88          | 0.33            | 6.74             | 7.17           | 28.16             | 7.89            | 10.14           | 15.70            | 28.58          | 32.61           |
| 17               | 391.68                | 0.48             | 7.01          | 1.05            | 7.29             | 6.65           | 29.24             | 7.82            | 11.16           | 16.56            | 30.24          | 34.48           |
| 20               | 268.75                | 0.35             | 7.97          | 0.81            | 7.85             | 4.00           | 23.35             | 4.65            | 13.43           | 17.37            | 24.24          | 29.82           |
| 23               | 184.03                | 0.46             | 1.88          | 0.24            | 8.93             | 2.47           | 16.50             | 2.89            | 17.48           | 20.13            | 16.45          | 25.99           |
| 26               | 97.04                 | 0.42             | 1.62          | 0.16            | 9.76             | 1.47           | 11.93             | 1.83            | 22.04           | 24.47            | 11.53          | 27.05           |
| 29               | 37.79                 | 0.43             | 1.05          | 0.08            | 11.82            | 0.61           | 6.37              | 1.04            | 26.58           | 29.30            | 5.57           | 29.83           |
| 32               | 9.71                  | 0.26             | 0.52          | 0.12            | 10.92            | 0.24           | 2.92              | 0.64            | 29.47           | 31.54            | 1.62           | 31.58           |
| 35               | 9.58                  | 0.10             | 0.38          | 0.18            | 7.73             | 0.26           | 1.86              | 0.65            | 31.69           | 32.67            | 0.65           | 32.68           |
| 38               | 7.56                  | 0.10             | 0.24          | 0.19            | 7.74             | 0.26           | 1.37              | 0.56            | 36.24           | 37.07            | 0.83           | 37.08           |
| 41               | 3.70                  | 0.15             | 0.31          | 0.19            | 11.02            | 0.29           | 1.55              | 0.57            | 39.51           | 41.05            | 0.94           | 41.06           |

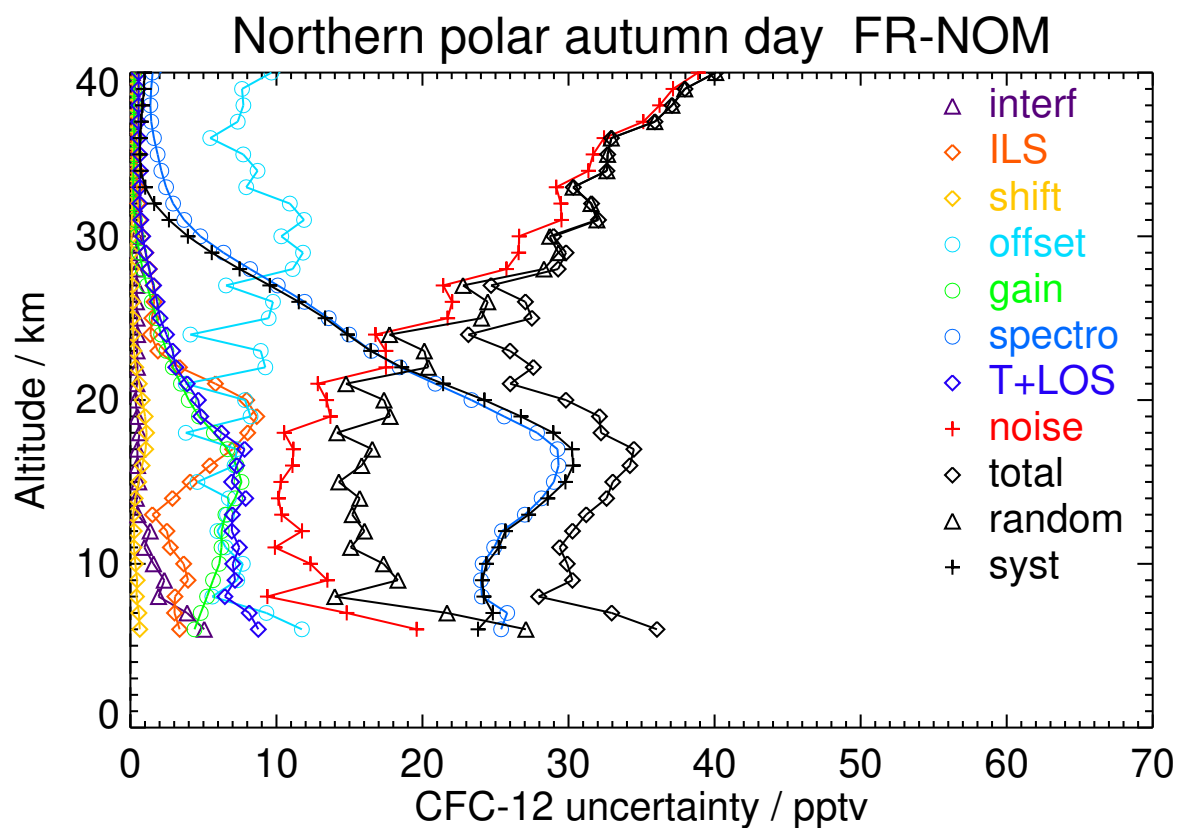

**Figure S7.** V8H\_F-12\_61 Northern polar autumn day

**Table S9.** CFC-12 error budget for Northern polar autumn night. All uncertainties are  $1\sigma$ .

| altitude<br>(km) | mean target<br>(pptv) | interf<br>(pptv) | ILS<br>(pptv) | shift<br>(pptv) | offset<br>(pptv) | gain<br>(pptv) | spectro<br>(pptv) | T+LOS<br>(pptv) | noise<br>(pptv) | random<br>(pptv) | syst<br>(pptv) | total<br>(pptv) |
|------------------|-----------------------|------------------|---------------|-----------------|------------------|----------------|-------------------|-----------------|-----------------|------------------|----------------|-----------------|
| 8                | 541.64                | 1.85             | 2.53          | 0.44            | 6.17             | 5.81           | 24.97             | 7.08            | 10.10           | 14.75            | 25.30          | 29.28           |
| 11               | 525.82                | 0.65             | 2.37          | 0.23            | 6.59             | 6.14           | 25.03             | 7.39            | 9.79            | 14.75            | 25.43          | 29.40           |
| 14               | 470.23                | 0.32             | 3.24          | 0.50            | 7.18             | 7.60           | 28.25             | 7.96            | 10.30           | 15.64            | 29.04          | 32.98           |
| 17               | 357.10                | 0.40             | 8.07          | 1.14            | 7.80             | 6.56           | 29.13             | 7.83            | 11.62           | 17.23            | 30.31          | 34.86           |
| 20               | 232.65                | 0.40             | 7.18          | 0.59            | 8.75             | 3.63           | 20.86             | 4.15            | 14.41           | 18.11            | 21.76          | 28.31           |
| 23               | 153.58                | 0.46             | 2.02          | 0.19            | 9.97             | 2.16           | 15.14             | 2.60            | 18.60           | 21.44            | 15.20          | 26.28           |
| 26               | 66.93                 | 0.43             | 1.45          | 0.11            | 10.80            | 1.02           | 9.13              | 1.52            | 23.01           | 25.65            | 8.78           | 27.11           |
| 29               | 29.59                 | 0.45             | 0.88          | 0.06            | 12.50            | 0.50           | 4.86              | 0.83            | 27.34           | 30.24            | 3.89           | 30.49           |
| 32               | 8.42                  | 0.20             | 0.55          | 0.13            | 11.04            | 0.31           | 2.90              | 0.66            | 29.32           | 31.44            | 1.58           | 31.48           |
| 35               | 1.21                  | 0.08             | 0.36          | 0.18            | 8.18             | 0.26           | 1.69              | 0.58            | 31.56           | 32.64            | 0.92           | 32.65           |
| 38               | -0.69                 | 0.09             | 0.38          | 0.20            | 7.75             | 0.33           | 1.62              | 0.60            | 35.84           | 36.70            | 0.88           | 36.71           |
| 41               | 3.01                  | 0.11             | 0.45          | 0.20            | 10.59            | 0.45           | 1.68              | 0.55            | 38.91           | 40.36            | 0.99           | 40.37           |

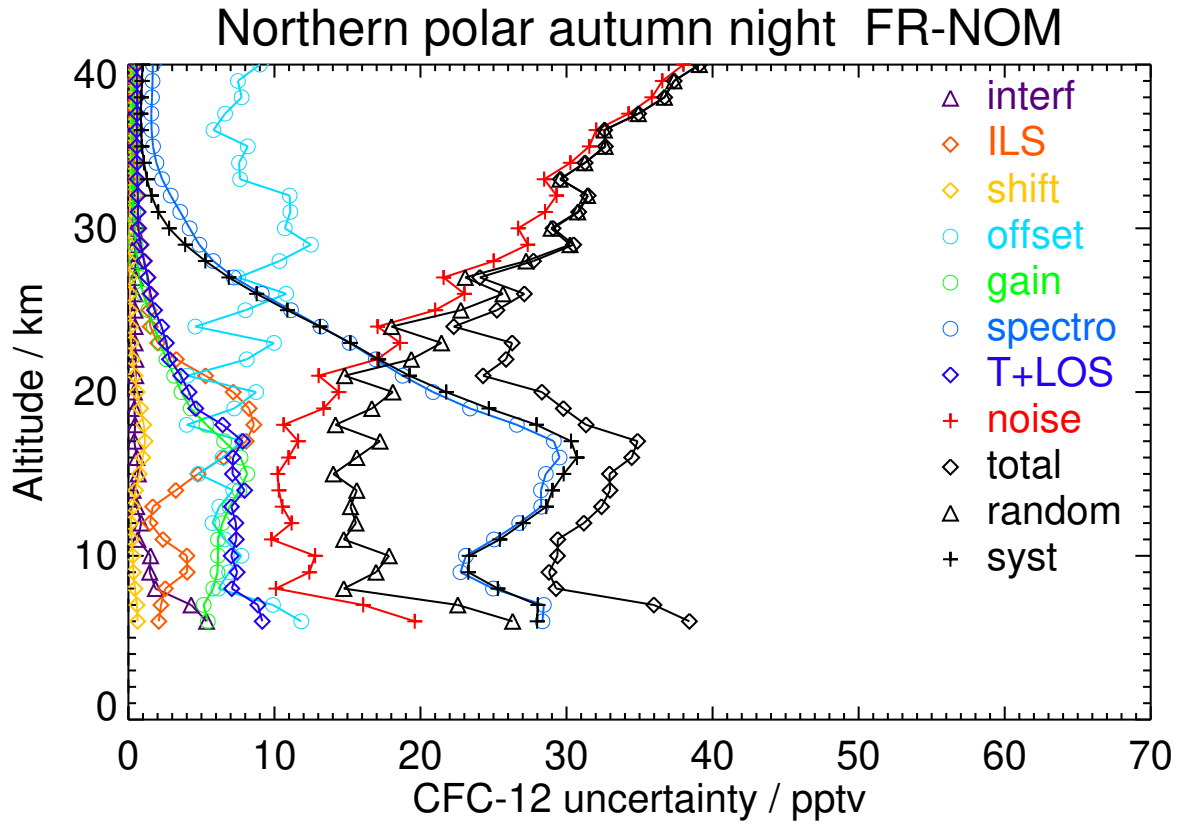

**Figure S8.** V8H\_F-12\_61 Northern polar autumn night

**Table S10.** CFC-12 error budget for Northern midlatitude winter day. All uncertainties are  $1\sigma$ .

| altitude<br>(km) | mean target<br>(pptv) | interf<br>(pptv) | ILS<br>(pptv) | shift<br>(pptv) | offset<br>(pptv) | gain<br>(pptv) | spectro<br>(pptv) | T+LOS<br>(pptv) | noise<br>(pptv) | random<br>(pptv) | syst<br>(pptv) | total<br>(pptv) |
|------------------|-----------------------|------------------|---------------|-----------------|------------------|----------------|-------------------|-----------------|-----------------|------------------|----------------|-----------------|
| 5                | 552.41                | 4.00             | 3.32          | 0.36            | 10.86            | 5.39           | 24.17             | 9.10            | 18.89           | 25.62            | 23.27          | 34.61           |
| 8                | 545.66                | 2.51             | 2.81          | 0.42            | 7.03             | 5.53           | 24.62             | 7.20            | 14.16           | 18.71            | 24.55          | 30.86           |
| 11               | 512.75                | 1.22             | 2.92          | 0.18            | 5.48             | 6.23           | 23.52             | 7.32            | 12.41           | 16.70            | 23.68          | 28.98           |
| 14               | 451.00                | 0.40             | 4.19          | 0.43            | 3.86             | 6.55           | 28.95             | 7.49            | 10.94           | 15.53            | 29.13          | 33.01           |
| 17               | 374.99                | 0.71             | 7.77          | 1.32            | 3.33             | 5.39           | 26.95             | 6.21            | 10.92           | 14.68            | 27.77          | 31.41           |
| 20               | 268.85                | 0.53             | 6.18          | 0.75            | 3.37             | 3.57           | 22.91             | 4.12            | 12.83           | 15.90            | 22.73          | 27.74           |
| 23               | 202.11                | 0.58             | 1.02          | 0.46            | 3.81             | 2.65           | 14.83             | 2.50            | 16.16           | 17.72            | 14.01          | 22.59           |
| 26               | 156.73                | 0.57             | 1.98          | 0.27            | 4.31             | 1.96           | 12.44             | 1.85            | 19.91           | 20.85            | 12.12          | 24.12           |
| 29               | 106.40                | 0.69             | 1.89          | 0.14            | 9.19             | 1.32           | 10.19             | 1.42            | 24.16           | 26.25            | 9.54           | 27.93           |
| 32               | 44.28                 | 0.35             | 1.01          | 0.14            | 9.54             | 0.53           | 5.83              | 0.80            | 26.22           | 28.13            | 4.85           | 28.54           |
| 35               | 18.03                 | 0.09             | 0.47          | 0.23            | 4.31             | 0.57           | 2.78              | 0.56            | 26.48           | 26.92            | 1.97           | 26.99           |
| 38               | 7.59                  | 0.11             | 0.26          | 0.22            | 4.98             | 0.63           | 1.90              | 0.52            | 31.11           | 31.54            | 1.54           | 31.57           |
| 41               | -2.82                 | 0.11             | 0.29          | 0.20            | 7.22             | 0.60           | 1.85              | 0.40            | 33.65           | 34.45            | 1.31           | 34.48           |

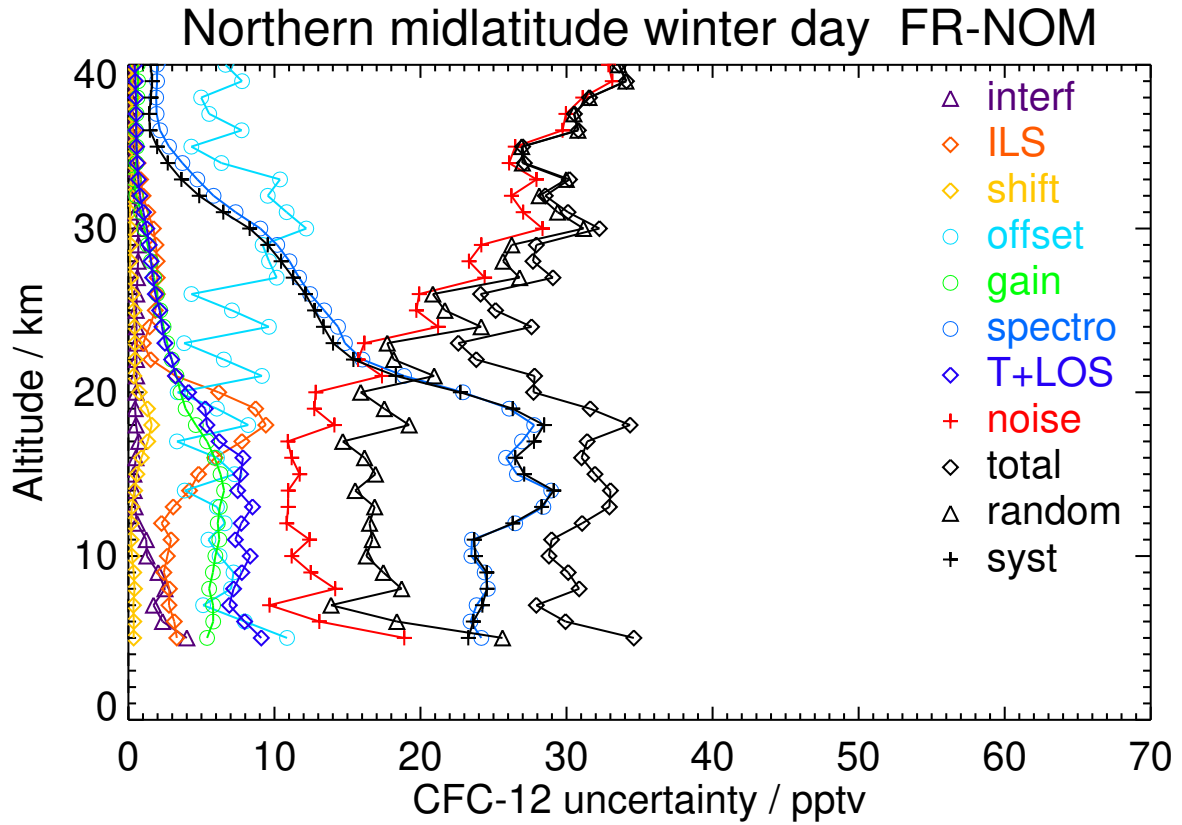

**Figure S9.** V8H\_F-12\_61 Northern midlatitude winter day

**Table S11.** CFC-12 error budget for Northern midlatitude winter night. All uncertainties are  $1\sigma$ .

| altitude<br>(km) | mean target<br>(pptv) | interf<br>(pptv) | ILS<br>(pptv) | shift<br>(pptv) | offset<br>(pptv) | gain<br>(pptv) | spectro<br>(pptv) | T+LOS<br>(pptv) | noise<br>(pptv) | random<br>(pptv) | syst<br>(pptv) | total<br>(pptv) |
|------------------|-----------------------|------------------|---------------|-----------------|------------------|----------------|-------------------|-----------------|-----------------|------------------|----------------|-----------------|
| 5                | 559.70                | 2.86             | 5.03          | 0.34            | 10.84            | 5.24           | 23.86             | 9.21            | 18.57           | 24.40            | 24.13          | 34.32           |
| 8                | 543.82                | 2.66             | 1.68          | 0.49            | 4.50             | 6.04           | 27.73             | 6.10            | 10.93           | 14.12            | 28.16          | 31.50           |
| 11               | 518.09                | 1.12             | 2.63          | 0.27            | 5.25             | 6.51           | 25.76             | 8.18            | 11.15           | 15.88            | 26.09          | 30.54           |
| 14               | 431.82                | 0.33             | 4.19          | 0.36            | 4.40             | 5.73           | 27.91             | 7.95            | 10.61           | 15.38            | 28.08          | 32.01           |
| 17               | 370.84                | 0.76             | 6.27          | 1.15            | 3.65             | 5.36           | 24.22             | 6.73            | 10.18           | 14.17            | 24.86          | 28.62           |
| 20               | 263.00                | 0.54             | 7.19          | 1.05            | 3.12             | 3.46           | 21.10             | 4.35            | 11.44           | 13.60            | 22.02          | 25.88           |
| 23               | 201.90                | 0.64             | 1.07          | 0.44            | 3.38             | 2.48           | 13.89             | 2.46            | 14.43           | 15.90            | 13.17          | 20.65           |
| 26               | 161.46                | 0.56             | 1.78          | 0.21            | 4.11             | 1.83           | 12.02             | 1.70            | 18.72           | 19.88            | 11.25          | 22.84           |
| 29               | 129.75                | 0.62             | 1.63          | 0.10            | 9.00             | 1.43           | 10.59             | 1.40            | 23.17           | 25.10            | 10.35          | 27.15           |
| 32               | 64.03                 | 0.40             | 1.38          | 0.13            | 10.38            | 0.82           | 7.69              | 0.99            | 27.27           | 29.44            | 6.90           | 30.24           |
| 35               | 20.03                 | 0.11             | 0.73          | 0.26            | 4.45             | 0.52           | 4.07              | 0.55            | 26.57           | 27.10            | 3.03           | 27.26           |
| 38               | -0.11                 | 0.10             | 0.30          | 0.22            | 4.72             | 0.48           | 1.87              | 0.51            | 31.04           | 31.43            | 1.38           | 31.46           |
| 41               | -9.30                 | 0.11             | 0.24          | 0.20            | 6.55             | 0.45           | 1.41              | 0.42            | 33.60           | 34.25            | 1.03           | 34.27           |

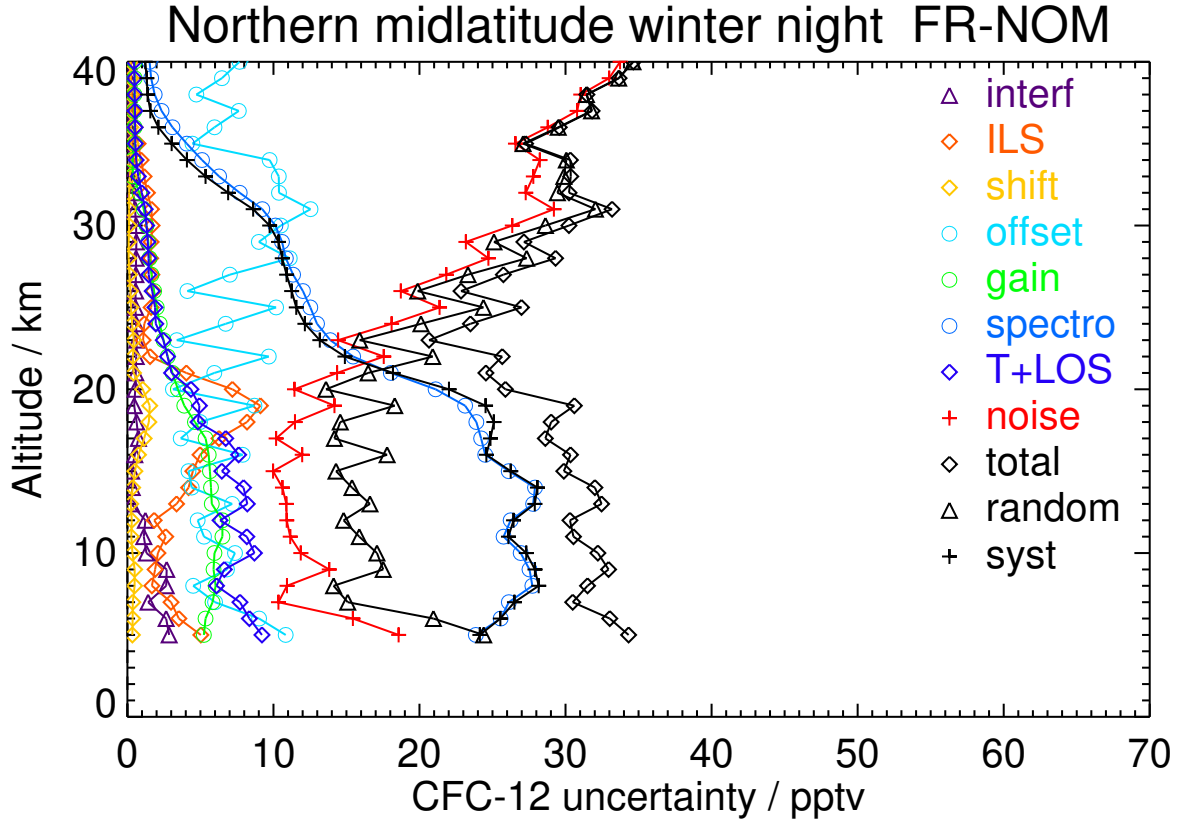

**Figure S10.** V8H\_F-12\_61 Northern midlatitude winter night

**Table S12.** CFC-12 error budget for Northern midlatitude spring day. All uncertainties are  $1\sigma$ .

| altitude<br>(km) | mean target<br>(pptv) | interf<br>(pptv) | ILS<br>(pptv) | shift<br>(pptv) | offset<br>(pptv) | gain<br>(pptv) | spectro<br>(pptv) | T+LOS<br>(pptv) | noise<br>(pptv) | random<br>(pptv) | syst<br>(pptv) | total<br>(pptv) |
|------------------|-----------------------|------------------|---------------|-----------------|------------------|----------------|-------------------|-----------------|-----------------|------------------|----------------|-----------------|
| 8                | 543.27                | 2.32             | 2.92          | 0.42            | 7.35             | 5.58           | 24.45             | 7.19            | 11.00           | 16.70            | 24.31          | 29.49           |
| 11               | 497.36                | 1.21             | 2.27          | 0.21            | 7.54             | 6.25           | 25.62             | 7.27            | 10.79           | 16.17            | 25.82          | 30.47           |
| 14               | 453.89                | 0.49             | 3.01          | 0.34            | 7.64             | 5.92           | 24.84             | 7.31            | 10.51           | 16.19            | 24.93          | 29.73           |
| 17               | 387.40                | 0.51             | 10.05         | 1.54            | 8.56             | 5.62           | 32.62             | 6.85            | 12.22           | 18.22            | 33.71          | 38.32           |
| 20               | 255.81                | 0.49             | 6.16          | 0.57            | 9.61             | 3.55           | 22.92             | 4.04            | 14.89           | 20.05            | 22.46          | 30.11           |
| 23               | 192.27                | 0.56             | 1.22          | 0.41            | 10.66            | 2.52           | 15.04             | 2.54            | 18.61           | 22.79            | 13.47          | 26.48           |
| 26               | 141.64                | 0.58             | 1.76          | 0.15            | 11.29            | 1.89           | 12.32             | 1.86            | 22.24           | 25.57            | 11.42          | 28.01           |
| 29               | 98.74                 | 0.76             | 1.57          | 0.22            | 12.42            | 1.18           | 8.81              | 1.51            | 25.74           | 28.86            | 8.26           | 30.02           |
| 32               | 51.90                 | 0.28             | 1.09          | 0.26            | 10.39            | 0.45           | 5.68              | 0.69            | 26.01           | 28.15            | 5.16           | 28.62           |
| 35               | 16.54                 | 0.16             | 0.50          | 0.26            | 8.64             | 0.46           | 3.01              | 0.49            | 28.08           | 29.47            | 2.06           | 29.55           |
| 38               | 6.57                  | 0.16             | 0.39          | 0.31            | 8.75             | 0.79           | 2.11              | 0.46            | 31.01           | 32.27            | 1.61           | 32.31           |
| 41               | 6.60                  | 0.14             | 0.34          | 0.21            | 9.61             | 0.67           | 1.78              | 0.34            | 32.50           | 33.92            | 1.33           | 33.95           |

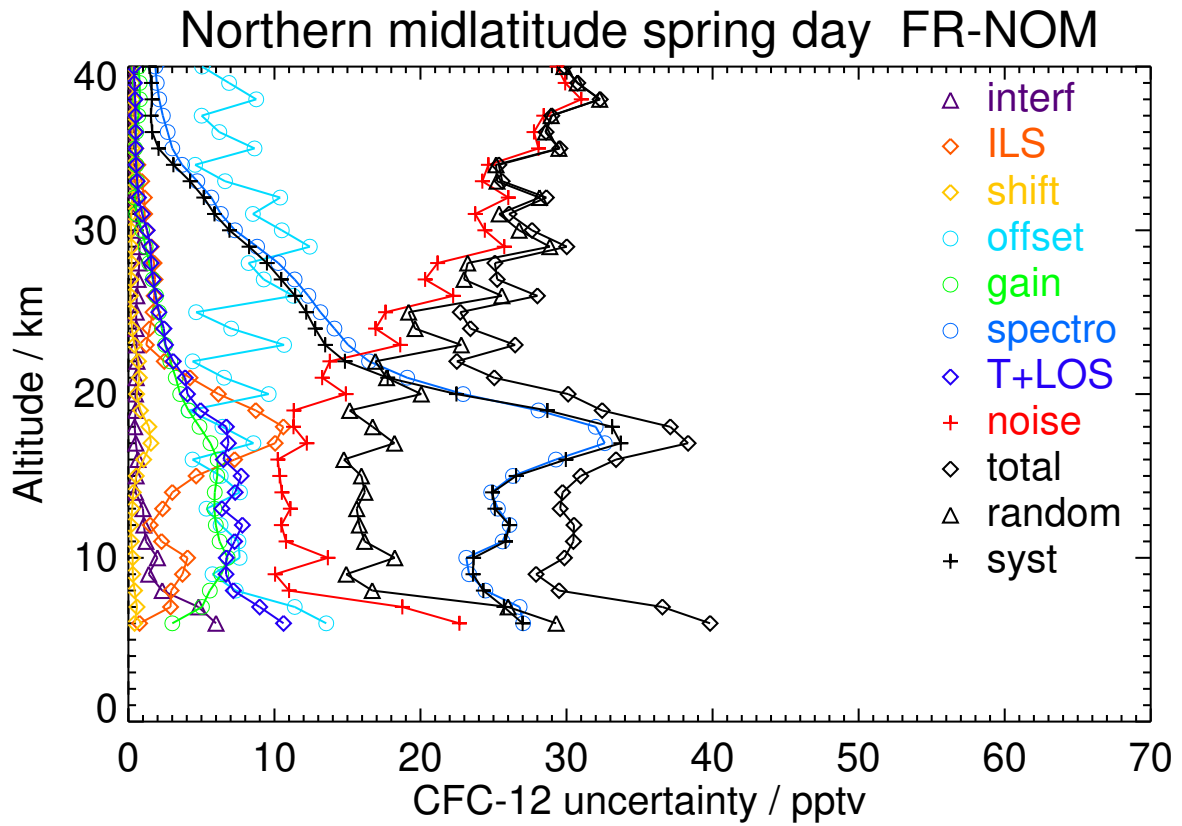

**Figure S11.** V8H\_F-12\_61 Northern midlatitude spring day

**Table S13.** CFC-12 error budget for Northern midlatitude spring night. All uncertainties are  $1\sigma$ .

| altitude<br>(km) | mean target<br>(pptv) | interf<br>(pptv) | ILS<br>(pptv) | shift<br>(pptv) | offset<br>(pptv) | gain<br>(pptv) | spectro<br>(pptv) | T+LOS<br>(pptv) | noise<br>(pptv) | random<br>(pptv) | syst<br>(pptv) | total<br>(pptv) |
|------------------|-----------------------|------------------|---------------|-----------------|------------------|----------------|-------------------|-----------------|-----------------|------------------|----------------|-----------------|
| 8                | 534.70                | 3.21             | 2.41          | 0.56            | 8.56             | 5.37           | 26.73             | 7.92            | 13.74           | 19.82            | 26.30          | 32.93           |
| 11               | 491.12                | 1.07             | 2.71          | 0.22            | 6.90             | 6.61           | 24.88             | 6.34            | 10.75           | 16.09            | 24.81          | 29.57           |
| 14               | 436.86                | 0.44             | 3.67          | 0.46            | 6.50             | 5.79           | 25.68             | 6.80            | 9.92            | 16.42            | 24.98          | 29.90           |
| 17               | 357.00                | 0.59             | 9.62          | 1.54            | 7.15             | 5.34           | 30.42             | 6.02            | 11.19           | 17.09            | 31.14          | 35.52           |
| 20               | 236.68                | 0.51             | 4.85          | 0.34            | 8.22             | 3.29           | 19.10             | 3.42            | 13.78           | 18.56            | 18.01          | 25.86           |
| 23               | 200.69                | 0.61             | 1.30          | 0.48            | 9.41             | 2.47           | 14.45             | 2.47            | 17.38           | 21.51            | 12.29          | 24.77           |
| 26               | 153.50                | 0.60             | 1.83          | 0.14            | 10.11            | 1.73           | 12.42             | 1.93            | 21.12           | 23.73            | 12.24          | 26.70           |
| 29               | 97.36                 | 0.75             | 1.66          | 0.16            | 11.90            | 1.10           | 8.74              | 1.43            | 24.62           | 27.53            | 8.54           | 28.82           |
| 32               | 65.83                 | 0.29             | 1.02          | 0.19            | 10.05            | 0.40           | 5.98              | 0.86            | 25.36           | 27.44            | 5.38           | 27.96           |
| 35               | 21.63                 | 0.14             | 0.43          | 0.28            | 7.78             | 0.53           | 3.20              | 0.53            | 27.13           | 28.30            | 2.60           | 28.42           |
| 38               | 15.94                 | 0.14             | 0.40          | 0.34            | 8.03             | 0.80           | 2.45              | 0.45            | 30.51           | 31.60            | 2.02           | 31.66           |
| 41               | 2.61                  | 0.13             | 0.26          | 0.20            | 8.55             | 0.61           | 1.77              | 0.38            | 31.41           | 32.58            | 1.44           | 32.62           |

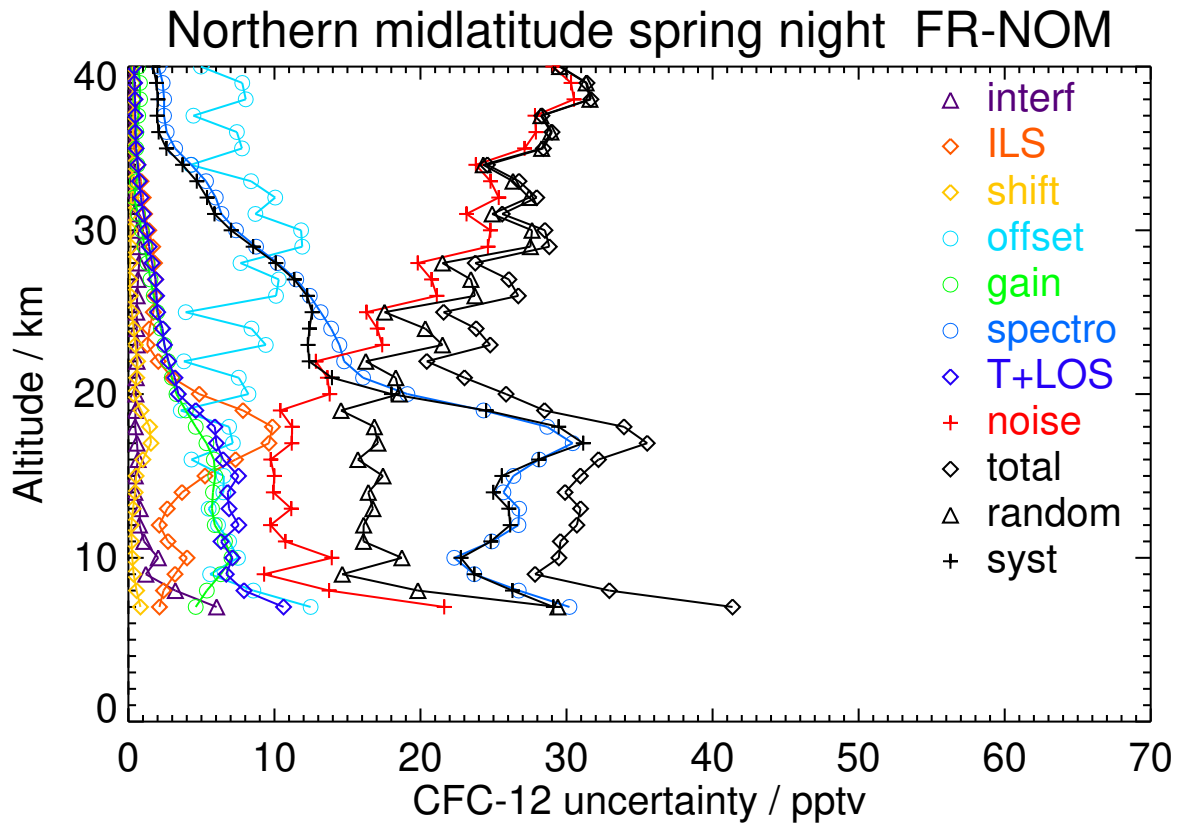

**Figure S12.** V8H\_F-12\_61 Northern midlatitude spring night

**Table S14.** CFC-12 error budget for Northern midlatitude summer day. All uncertainties are  $1\sigma$ .

| altitude<br>(km) | mean target<br>(pptv) | interf<br>(pptv) | ILS<br>(pptv) | shift<br>(pptv) | offset<br>(pptv) | gain<br>(pptv) | spectro<br>(pptv) | T+LOS<br>(pptv) | noise<br>(pptv) | random<br>(pptv) | syst<br>(pptv) | total<br>(pptv) |
|------------------|-----------------------|------------------|---------------|-----------------|------------------|----------------|-------------------|-----------------|-----------------|------------------|----------------|-----------------|
| 8                | 539.03                | 4.13             | 6.12          | 0.45            | 10.22            | 8.29           | 23.15             | 8.35            | 18.29           | 24.42            | 23.90          | 34.17           |
| 11               | 525.21                | 1.80             | 8.24          | 0.35            | 6.32             | 4.74           | 23.96             | 7.13            | 12.24           | 16.92            | 24.94          | 30.14           |
| 14               | 528.69                | 0.93             | 3.10          | 0.39            | 4.73             | 7.75           | 25.21             | 7.33            | 11.10           | 16.10            | 25.42          | 30.09           |
| 17               | 491.36                | 0.70             | 9.71          | 1.47            | 3.80             | 6.90           | 35.92             | 7.87            | 11.23           | 15.39            | 37.42          | 40.46           |
| 20               | 358.73                | 0.62             | 10.07         | 0.63            | 3.10             | 4.18           | 33.37             | 6.13            | 12.06           | 15.17            | 34.58          | 37.76           |
| 23               | 237.51                | 0.60             | 0.84          | 1.22            | 3.34             | 3.33           | 17.74             | 3.83            | 14.28           | 15.55            | 17.78          | 23.62           |
| 26               | 173.48                | 0.64             | 2.56          | 0.37            | 3.73             | 2.08           | 13.82             | 2.50            | 17.59           | 18.41            | 13.88          | 23.06           |
| 29               | 102.96                | 0.84             | 1.84          | 0.18            | 7.64             | 1.11           | 10.11             | 1.81            | 20.92           | 22.50            | 10.05          | 24.64           |
| 32               | 47.48                 | 0.43             | 0.70          | 0.09            | 7.98             | 0.36           | 4.61              | 0.79            | 23.06           | 24.49            | 4.26           | 24.86           |
| 35               | 22.38                 | 0.13             | 0.36          | 0.36            | 3.87             | 0.75           | 2.78              | 0.51            | 23.63           | 24.01            | 2.40           | 24.13           |
| 38               | -5.63                 | 0.14             | 0.25          | 0.32            | 4.47             | 0.75           | 2.06              | 0.44            | 27.61           | 28.01            | 1.67           | 28.06           |
| 41               | 2.68                  | 0.13             | 0.22          | 0.16            | 5.14             | 0.80           | 1.70              | 0.38            | 28.78           | 29.26            | 1.50           | 29.30           |

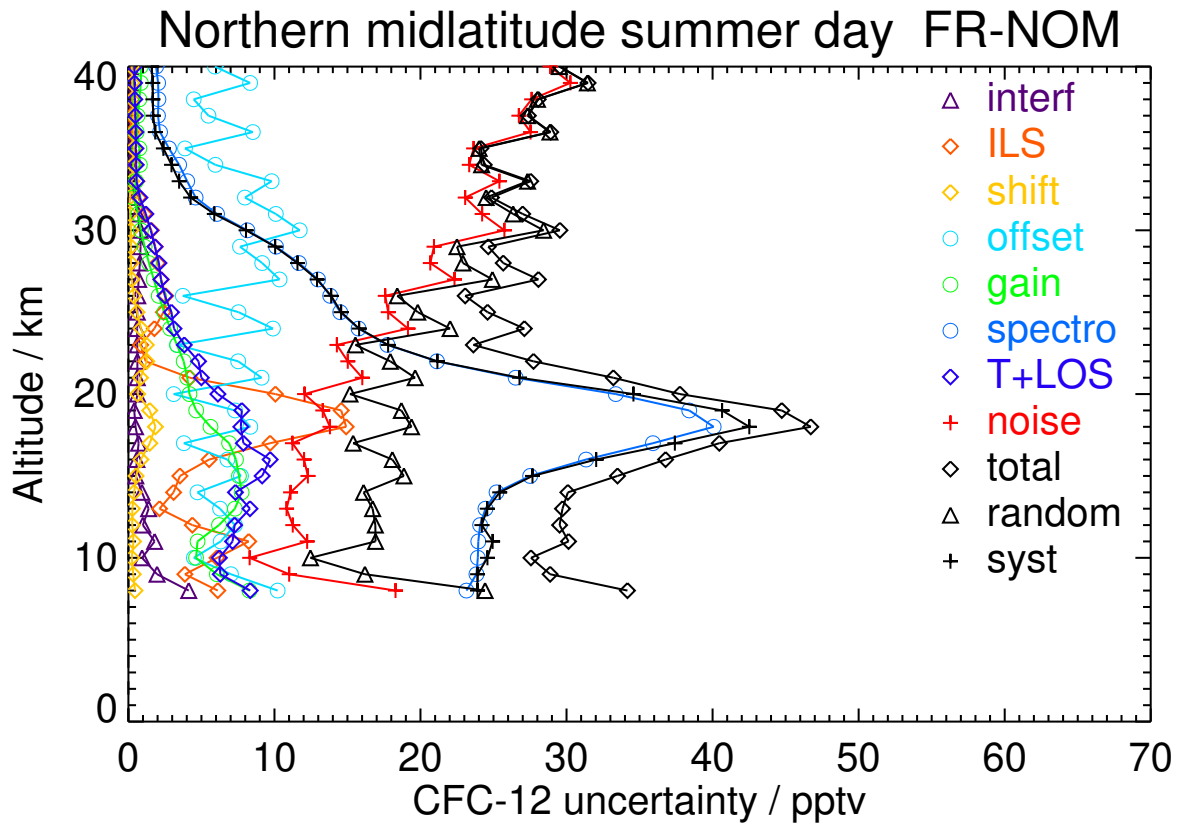

**Figure S13.** V8H\_F-12\_61 Northern midlatitude summer day

**Table S15.** CFC-12 error budget for Northern midlatitude summer night. All uncertainties are  $1\sigma$ .

| altitude<br>(km) | mean target<br>(pptv) | interf<br>(pptv) | ILS<br>(pptv) | shift<br>(pptv) | offset<br>(pptv) | gain<br>(pptv) | spectro<br>(pptv) | T+LOS<br>(pptv) | noise<br>(pptv) | random<br>(pptv) | syst<br>(pptv) | total<br>(pptv) |
|------------------|-----------------------|------------------|---------------|-----------------|------------------|----------------|-------------------|-----------------|-----------------|------------------|----------------|-----------------|
| 8                | 557.89                | 3.65             | 3.59          | 0.44            | 9.92             | 6.57           | 26.07             | 7.45            | 17.52           | 24.03            | 25.15          | 34.78           |
| 11               | 529.43                | 1.43             | 4.66          | 0.37            | 4.78             | 5.34           | 24.64             | 6.33            | 10.77           | 14.60            | 25.01          | 28.96           |
| 14               | 523.87                | 1.08             | 2.03          | 0.43            | 4.09             | 7.95           | 24.69             | 7.50            | 10.67           | 14.74            | 25.45          | 29.41           |
| 17               | 483.93                | 0.50             | 7.74          | 1.05            | 3.56             | 6.62           | 30.91             | 8.45            | 11.00           | 15.14            | 32.19          | 35.57           |
| 20               | 345.16                | 0.55             | 11.29         | 0.56            | 2.95             | 4.06           | 32.47             | 6.68            | 11.91           | 15.11            | 34.14          | 37.34           |
| 23               | 223.95                | 0.58             | 0.60          | 0.92            | 2.91             | 2.92           | 16.41             | 3.93            | 14.01           | 15.11            | 16.47          | 22.35           |
| 26               | 166.04                | 0.62             | 2.56          | 0.23            | 3.15             | 1.92           | 13.51             | 2.52            | 17.36           | 18.10            | 13.54          | 22.61           |
| 29               | 93.23                 | 0.77             | 1.76          | 0.13            | 7.40             | 1.14           | 9.48              | 1.72            | 20.81           | 22.29            | 9.42           | 24.20           |
| 32               | 43.67                 | 0.47             | 0.64          | 0.09            | 8.24             | 0.40           | 4.42              | 0.84            | 23.80           | 25.31            | 3.87           | 25.60           |
| 35               | 17.69                 | 0.12             | 0.39          | 0.34            | 3.04             | 0.73           | 2.70              | 0.52            | 23.51           | 23.78            | 2.15           | 23.88           |
| 38               | 0.95                  | 0.14             | 0.28          | 0.34            | 3.40             | 0.69           | 2.03              | 0.49            | 27.75           | 28.00            | 1.58           | 28.05           |
| 41               | -2.19                 | 0.13             | 0.24          | 0.18            | 4.09             | 0.76           | 1.69              | 0.39            | 29.27           | 29.58            | 1.56           | 29.62           |

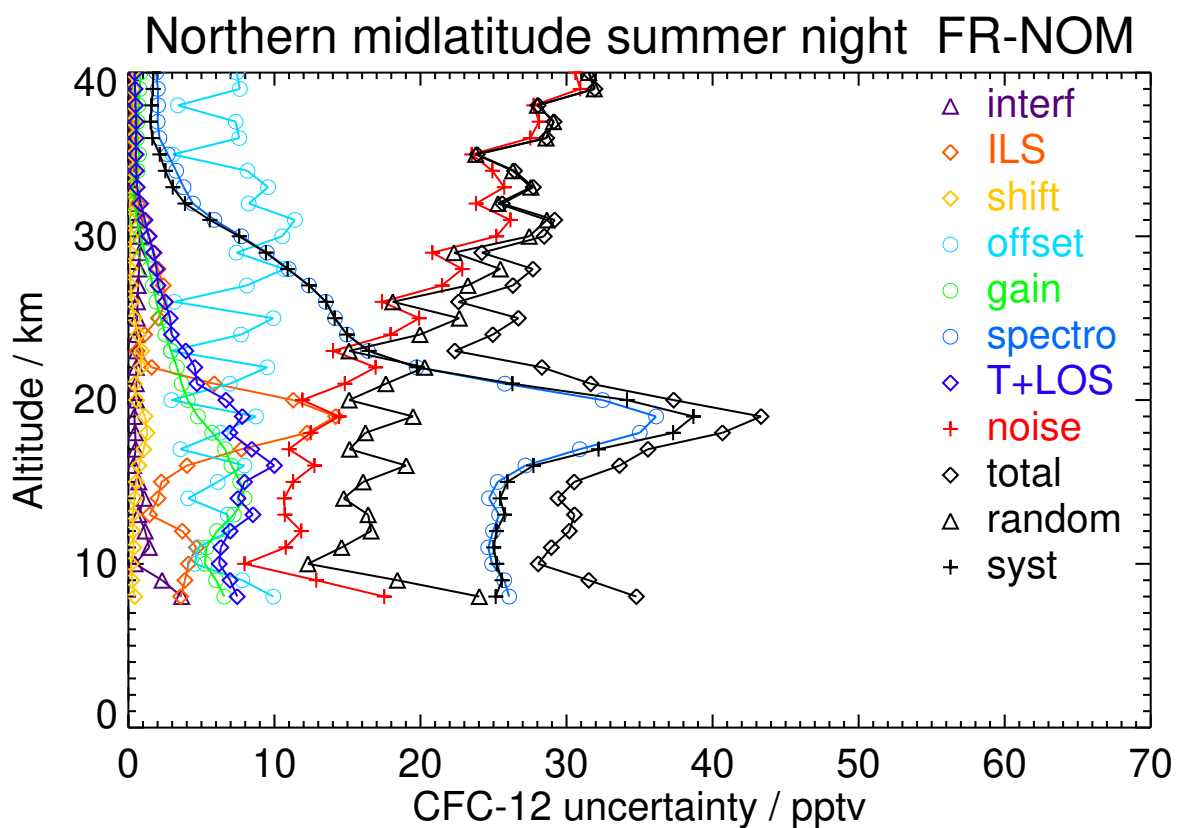

**Figure S14.** V8H\_F-12\_61 Northern midlatitude summer night

**Table S16.** CFC-12 error budget for Northern midlatitude autumn day. All uncertainties are  $1\sigma$ .

| altitude<br>(km) | mean target<br>(pptv) | interf<br>(pptv) | ILS<br>(pptv) | shift<br>(pptv) | offset<br>(pptv) | gain<br>(pptv) | spectro<br>(pptv) | T+LOS<br>(pptv) | noise<br>(pptv) | random<br>(pptv) | syst<br>(pptv) | total<br>(pptv) |
|------------------|-----------------------|------------------|---------------|-----------------|------------------|----------------|-------------------|-----------------|-----------------|------------------|----------------|-----------------|
| 8                | 549.03                | 3.68             | 2.96          | 0.41            | 9.82             | 6.37           | 26.98             | 8.62            | 15.69           | 22.19            | 26.74          | 34.75           |
| 11               | 537.22                | 1.09             | 5.26          | 0.25            | 4.97             | 7.02           | 22.31             | 6.22            | 9.33            | 13.55            | 23.30          | 26.95           |
| 14               | 530.69                | 0.92             | 3.03          | 0.46            | 6.16             | 6.80           | 28.82             | 9.03            | 11.26           | 18.31            | 28.26          | 33.67           |
| 17               | 461.25                | 0.55             | 8.28          | 1.15            | 6.16             | 7.27           | 35.11             | 9.79            | 11.96           | 17.98            | 36.19          | 40.41           |
| 20               | 303.76                | 0.38             | 12.45         | 0.53            | 6.01             | 3.43           | 31.13             | 6.67            | 13.00           | 17.76            | 32.72          | 37.23           |
| 23               | 209.87                | 0.60             | 1.54          | 0.40            | 6.25             | 2.72           | 16.57             | 3.64            | 15.64           | 18.29            | 15.72          | 24.12           |
| 26               | 138.03                | 0.59             | 2.36          | 0.23            | 6.40             | 1.66           | 12.92             | 2.19            | 18.92           | 20.66            | 12.35          | 24.07           |
| 29               | 86.38                 | 0.68             | 1.36          | 0.15            | 9.41             | 1.08           | 7.97              | 1.29            | 22.63           | 24.84            | 7.24           | 25.88           |
| 32               | 55.15                 | 0.43             | 0.80          | 0.11            | 10.10            | 0.50           | 5.28              | 0.75            | 25.73           | 27.82            | 4.42           | 28.17           |
| 35               | 19.04                 | 0.12             | 0.58          | 0.24            | 4.95             | 0.57           | 3.49              | 0.49            | 25.81           | 26.39            | 2.74           | 26.53           |
| 38               | 1.96                  | 0.12             | 0.29          | 0.26            | 4.94             | 0.57           | 2.00              | 0.54            | 30.37           | 30.81            | 1.46           | 30.85           |
| 41               | -3.04                 | 0.12             | 0.32          | 0.28            | 6.19             | 0.58           | 2.08              | 0.44            | 32.79           | 33.41            | 1.61           | 33.45           |

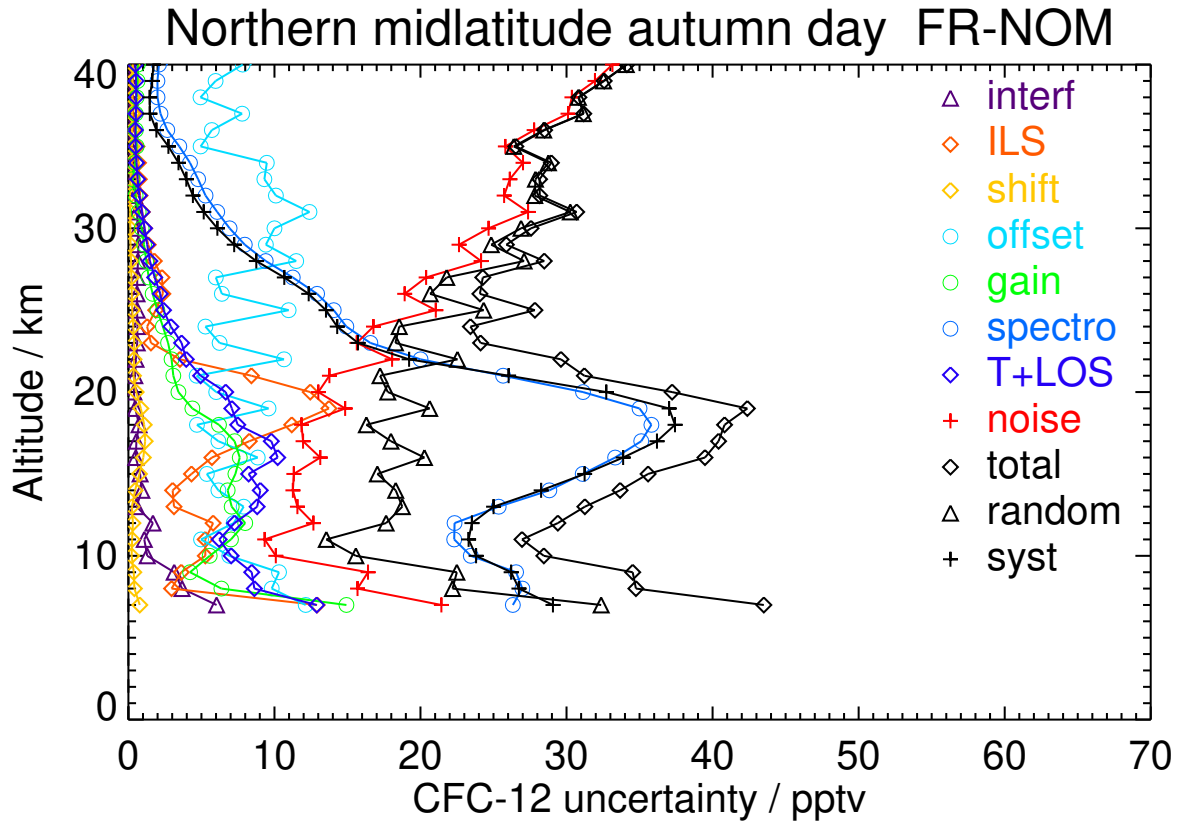

**Figure S15.** V8H\_F-12\_61 Northern midlatitude autumn day

**Table S17.** CFC-12 error budget for Northern midlatitude autumn night. All uncertainties are  $1\sigma$ .

| altitude<br>(km) | mean target<br>(pptv) | interf<br>(pptv) | ILS<br>(pptv) | shift<br>(pptv) | offset<br>(pptv) | gain<br>(pptv) | spectro<br>(pptv) | T+LOS<br>(pptv) | noise<br>(pptv) | random<br>(pptv) | syst<br>(pptv) | total<br>(pptv) |
|------------------|-----------------------|------------------|---------------|-----------------|------------------|----------------|-------------------|-----------------|-----------------|------------------|----------------|-----------------|
| 8                | 541.23                | 1.58             | 3.86          | 0.55            | 6.09             | 5.37           | 25.78             | 6.18            | 9.65            | 14.32            | 25.97          | 29.65           |
| 11               | 527.86                | 1.08             | 3.18          | 0.26            | 6.33             | 6.91           | 24.08             | 6.84            | 10.03           | 14.91            | 24.59          | 28.75           |
| 14               | 516.21                | 0.51             | 2.48          | 0.41            | 6.78             | 6.97           | 27.96             | 8.32            | 10.67           | 16.04            | 28.44          | 32.65           |
| 17               | 423.56                | 0.47             | 8.34          | 1.07            | 7.38             | 6.56           | 30.72             | 8.58            | 11.82           | 17.83            | 31.74          | 36.41           |
| 20               | 303.32                | 0.37             | 9.99          | 0.53            | 7.91             | 3.85           | 26.54             | 5.35            | 13.86           | 18.41            | 27.63          | 33.20           |
| 23               | 213.44                | 0.57             | 1.64          | 0.28            | 8.68             | 2.56           | 16.77             | 3.37            | 17.03           | 20.27            | 16.02          | 25.84           |
| 26               | 155.76                | 0.58             | 1.92          | 0.14            | 9.31             | 1.76           | 13.67             | 2.14            | 20.66           | 23.31            | 12.97          | 26.68           |
| 29               | 84.92                 | 0.68             | 1.80          | 0.15            | 11.34            | 1.20           | 9.85              | 1.58            | 24.59           | 27.55            | 8.90           | 28.95           |
| 32               | 44.12                 | 0.30             | 0.92          | 0.19            | 9.94             | 0.46           | 4.98              | 0.88            | 25.67           | 27.76            | 3.74           | 28.01           |
| 35               | 24.77                 | 0.13             | 0.68          | 0.23            | 7.23             | 0.48           | 3.65              | 0.53            | 27.14           | 28.26            | 2.18           | 28.34           |
| 38               | 7.96                  | 0.12             | 0.40          | 0.26            | 6.24             | 0.52           | 2.37              | 0.52            | 31.04           | 31.72            | 1.77           | 31.77           |
| 41               | -2.77                 | 0.11             | 0.27          | 0.26            | 6.98             | 0.56           | 1.86              | 0.41            | 33.48           | 34.23            | 1.53           | 34.26           |

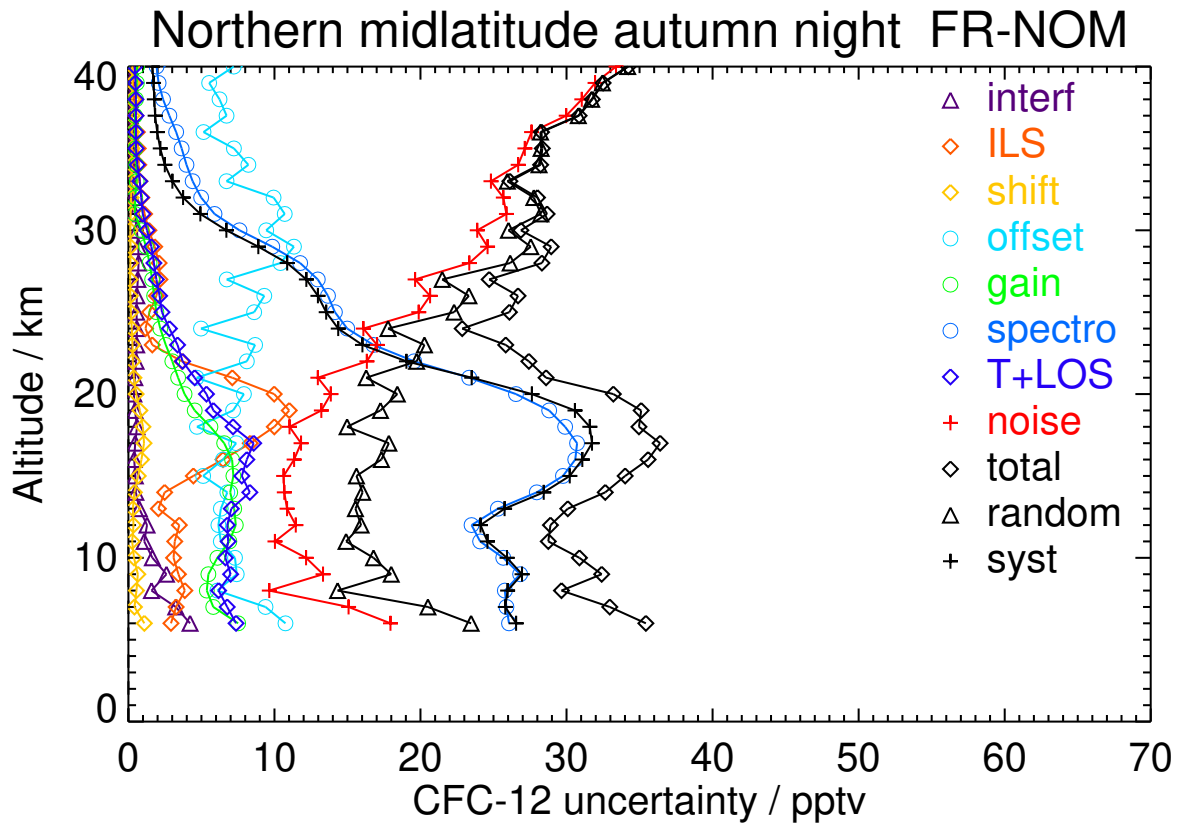

**Figure S16.** V8H\_F-12\_61 Northern midlatitude autumn night

**Table S18.** CFC-12 error budget for Tropics day. All uncertainties are  $1\sigma$ .

| altitude<br>(km) | mean target<br>(pptv) | interf<br>(pptv) | ILS<br>(pptv) | shift<br>(pptv) | offset<br>(pptv) | gain<br>(pptv) | spectro<br>(pptv) | T+LOS<br>(pptv) | noise<br>(pptv) | random<br>(pptv) | syst<br>(pptv) | total<br>(pptv) |
|------------------|-----------------------|------------------|---------------|-----------------|------------------|----------------|-------------------|-----------------|-----------------|------------------|----------------|-----------------|
| 8                | 559.59                | 3.77             | 9.67          | 0.53            | 7.92             | 13.20          | 27.25             | 8.23            | 13.12           | 21.11            | 29.69          | 36.43           |
| 11               | 528.65                | 1.68             | 9.68          | 0.57            | 7.50             | 7.20           | 22.23             | 7.40            | 11.29           | 18.68            | 23.07          | 29.68           |
| 14               | 561.13                | 0.71             | 6.16          | 1.46            | 8.45             | 11.81          | 23.11             | 10.12           | 14.00           | 20.50            | 25.76          | 32.92           |
| 17               | 559.83                | 1.81             | 19.11         | 0.82            | 10.68            | 4.32           | 44.36             | 10.94           | 17.49           | 24.79            | 47.76          | 53.81           |
| 20               | 472.52                | 0.67             | 5.93          | 0.39            | 8.82             | 6.45           | 28.51             | 6.94            | 17.57           | 21.51            | 29.37          | 36.40           |
| 23               | 422.00                | 0.61             | 2.10          | 1.00            | 9.17             | 4.17           | 26.13             | 5.34            | 19.15           | 22.27            | 26.26          | 34.43           |
| 26               | 358.91                | 0.66             | 3.42          | 0.38            | 9.82             | 3.49           | 24.54             | 4.27            | 21.72           | 24.48            | 24.77          | 34.83           |
| 29               | 278.73                | 0.88             | 3.46          | 0.30            | 11.52            | 3.38           | 19.70             | 3.38            | 24.82           | 27.97            | 19.76          | 34.25           |
| 32               | 193.50                | 0.31             | 2.40          | 0.28            | 9.84             | 0.91           | 14.66             | 2.16            | 24.93           | 27.18            | 14.34          | 30.73           |
| 35               | 93.97                 | 0.17             | 1.56          | 0.30            | 8.32             | 0.82           | 9.24              | 1.25            | 27.06           | 28.48            | 8.96           | 29.86           |
| 38               | 36.07                 | 0.15             | 0.83          | 0.34            | 8.39             | 0.87           | 4.87              | 0.86            | 29.86           | 31.11            | 4.51           | 31.44           |
| 41               | 11.54                 | 0.14             | 0.37          | 0.16            | 9.93             | 0.70           | 2.36              | 0.52            | 31.67           | 33.24            | 1.87           | 33.29           |

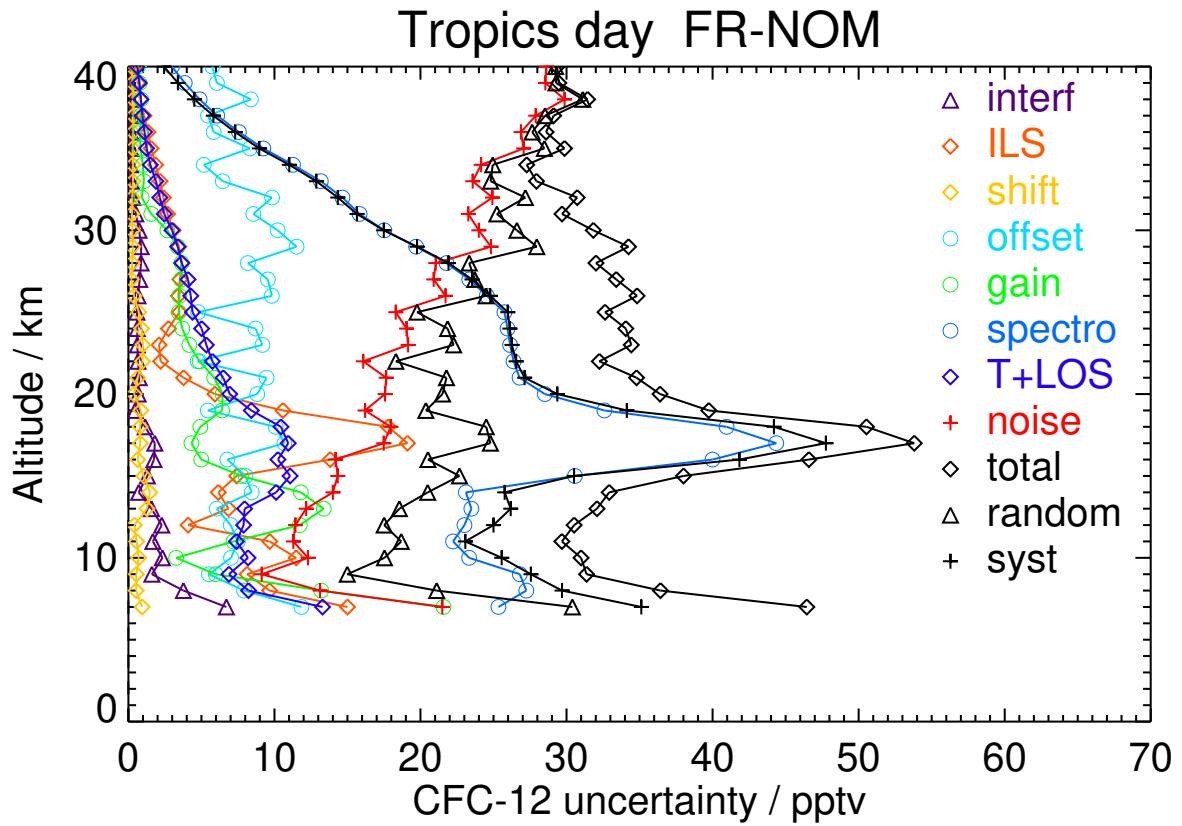

**Figure S17.** V8H\_F-12\_61 Tropics day

**Table S19.** CFC-12 error budget for Tropics night. All uncertainties are  $1\sigma$ .

| altitude<br>(km) | mean target<br>(pptv) | interf<br>(pptv) | ILS<br>(pptv) | shift<br>(pptv) | offset<br>(pptv) | gain<br>(pptv) | spectro<br>(pptv) | T+LOS<br>(pptv) | noise<br>(pptv) | random<br>(pptv) | syst<br>(pptv) | total<br>(pptv) |
|------------------|-----------------------|------------------|---------------|-----------------|------------------|----------------|-------------------|-----------------|-----------------|------------------|----------------|-----------------|
| 8                | 537.03                | 2.35             | 4.37          | 0.76            | 6.16             | 11.06          | 24.83             | 6.39            | 9.42            | 14.83            | 26.68          | 30.52           |
| 11               | 539.66                | 0.93             | 2.63          | 0.54            | 7.33             | 6.13           | 25.20             | 6.00            | 10.01           | 15.78            | 24.93          | 29.51           |
| 14               | 566.17                | 0.46             | 6.79          | 1.80            | 9.38             | 11.35          | 23.59             | 10.80           | 14.34           | 21.22            | 26.37          | 33.84           |
| 17               | 558.74                | 1.53             | 17.54         | 1.14            | 11.65            | 3.68           | 41.39             | 10.18           | 18.92           | 26.37            | 44.04          | 51.33           |
| 20               | 503.62                | 0.60             | 3.98          | 0.68            | 10.18            | 6.12           | 31.80             | 7.19            | 18.83           | 23.08            | 32.28          | 39.69           |
| 23               | 442.58                | 0.58             | 3.28          | 1.59            | 10.32            | 4.73           | 28.42             | 5.95            | 20.12           | 23.79            | 28.71          | 37.29           |
| 26               | 376.66                | 0.65             | 3.89          | 0.43            | 10.69            | 3.41           | 25.39             | 4.57            | 22.34           | 25.44            | 25.67          | 36.14           |
| 29               | 302.06                | 0.88             | 4.09          | 0.33            | 12.30            | 3.41           | 20.99             | 3.63            | 25.29           | 28.59            | 21.36          | 35.69           |
| 32               | 211.40                | 0.32             | 2.10          | 0.32            | 10.51            | 1.01           | 15.76             | 2.23            | 25.53           | 27.88            | 15.61          | 31.96           |
| 35               | 111.92                | 0.17             | 1.07          | 0.32            | 9.00             | 0.84           | 9.85              | 1.42            | 27.46           | 29.05            | 9.60           | 30.60           |
| 38               | 43.05                 | 0.16             | 0.81          | 0.33            | 8.72             | 0.85           | 5.65              | 0.97            | 30.32           | 31.62            | 5.46           | 32.09           |
| 41               | 8.24                  | 0.13             | 0.27          | 0.14            | 9.34             | 0.67           | 2.27              | 0.53            | 31.10           | 32.50            | 1.97           | 32.56           |

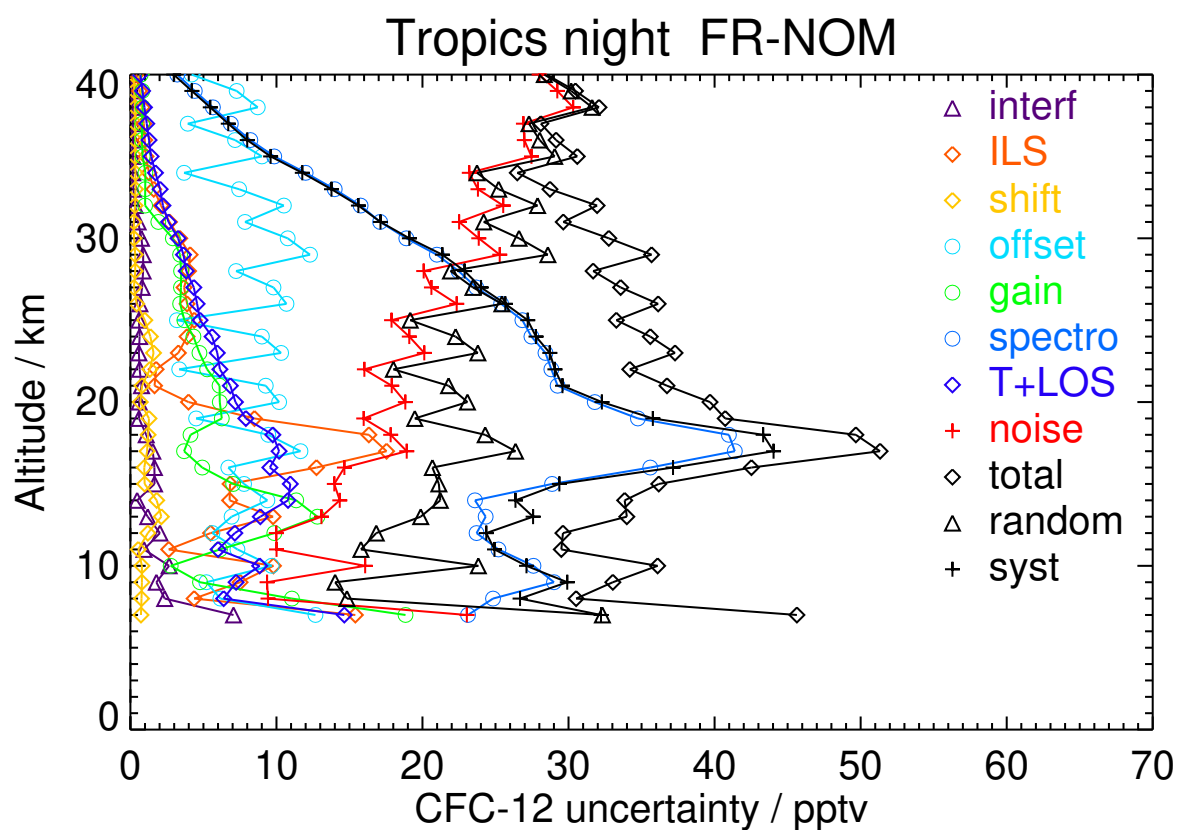

**Figure S18.** V8H\_F-12\_61 Tropics night

**Table S20.** CFC-12 error budget for Southern midlatitude winter day. All uncertainties are  $1\sigma$ .

| altitude<br>(km) | mean target<br>(pptv) | interf<br>(pptv) | ILS<br>(pptv) | shift<br>(pptv) | offset<br>(pptv) | gain<br>(pptv) | spectro<br>(pptv) | T+LOS<br>(pptv) | noise<br>(pptv) | random<br>(pptv) | syst<br>(pptv) | total<br>(pptv) |
|------------------|-----------------------|------------------|---------------|-----------------|------------------|----------------|-------------------|-----------------|-----------------|------------------|----------------|-----------------|
| 5                | 515.36                | 3.26             | 3.36          | 0.40            | 9.65             | 9.40           | 22.88             | 5.76            | 17.19           | 21.92            | 23.98          | 32.49           |
| 8                | 542.95                | 1.79             | 2.72          | 0.40            | 4.58             | 5.93           | 28.55             | 6.01            | 9.56            | 13.06            | 28.96          | 31.77           |
| 11               | 521.03                | 1.11             | 2.12          | 0.14            | 6.00             | 6.96           | 26.06             | 8.22            | 10.86           | 16.28            | 26.26          | 30.90           |
| 14               | 470.96                | 0.39             | 3.84          | 0.44            | 5.63             | 6.78           | 30.15             | 8.30            | 11.00           | 16.23            | 30.47          | 34.52           |
| 17               | 403.25                | 0.46             | 6.52          | 0.91            | 5.69             | 6.42           | 29.28             | 7.93            | 11.60           | 16.11            | 30.21          | 34.23           |
| 20               | 300.40                | 0.33             | 7.83          | 0.69            | 5.79             | 4.00           | 26.08             | 5.24            | 13.88           | 17.37            | 26.65          | 31.81           |
| 23               | 227.90                | 0.45             | 1.87          | 0.45            | 6.68             | 2.80           | 18.35             | 3.34            | 17.74           | 19.96            | 17.90          | 26.81           |
| 26               | 166.51                | 0.44             | 1.78          | 0.24            | 8.00             | 1.98           | 13.93             | 2.27            | 22.46           | 24.36            | 13.49          | 27.84           |
| 29               | 123.79                | 0.50             | 1.94          | 0.20            | 10.77            | 1.48           | 11.83             | 1.85            | 26.98           | 29.49            | 11.14          | 31.52           |
| 32               | 48.48                 | 0.28             | 1.30          | 0.21            | 9.75             | 0.62           | 7.12              | 1.24            | 29.11           | 30.94            | 6.28           | 31.57           |
| 35               | 18.12                 | 0.20             | 0.64          | 0.25            | 6.78             | 0.32           | 3.37              | 0.71            | 31.21           | 32.07            | 2.10           | 32.13           |
| 38               | 5.97                  | 0.22             | 0.54          | 0.26            | 6.65             | 0.40           | 2.41              | 0.68            | 34.92           | 35.62            | 1.28           | 35.64           |
| 41               | -3.56                 | 0.23             | 0.50          | 0.19            | 8.85             | 0.47           | 1.91              | 0.64            | 37.15           | 38.23            | 1.09           | 38.25           |

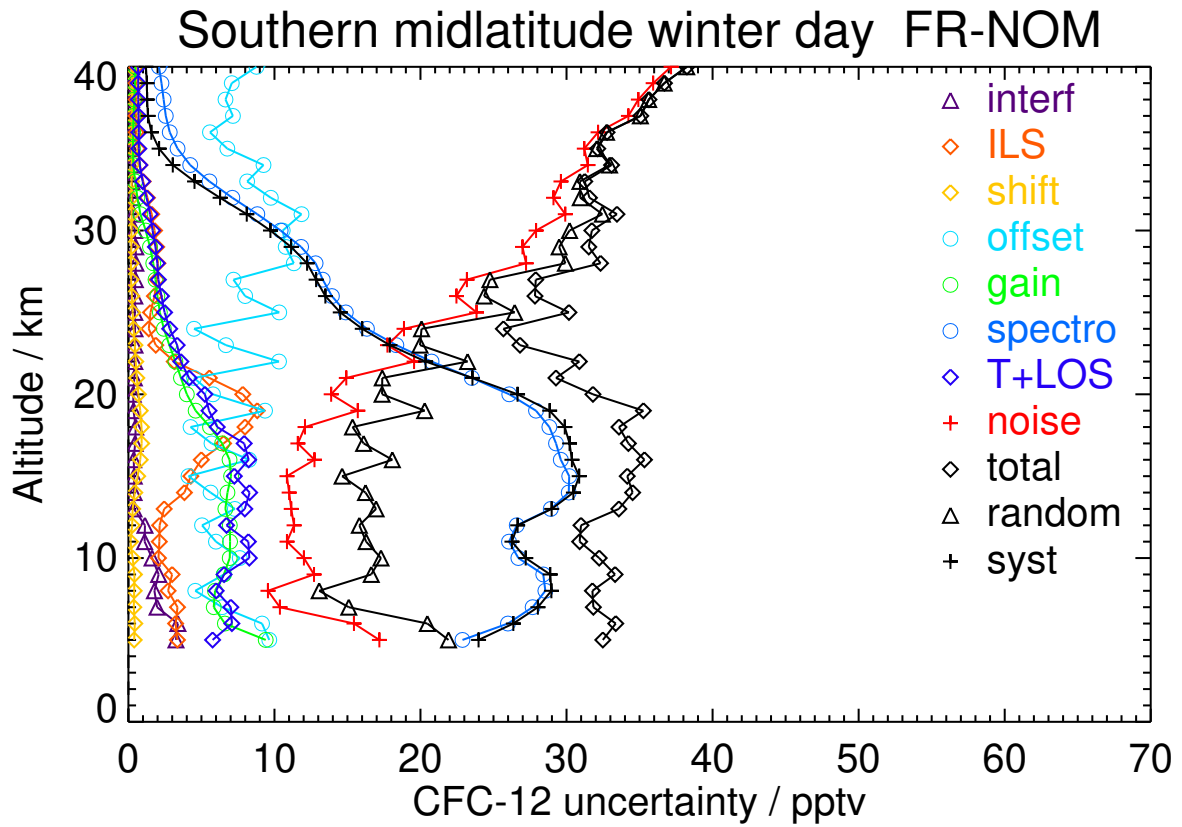

**Figure S19.** V8H\_F-12\_61 Southern midlatitude winter day

**Table S21.** CFC-12 error budget for Southern midlatitude winter night. All uncertainties are  $1\sigma$ .

| altitude<br>(km) | mean target<br>(pptv) | interf<br>(pptv) | ILS<br>(pptv) | shift<br>(pptv) | offset<br>(pptv) | gain<br>(pptv) | spectro<br>(pptv) | T+LOS<br>(pptv) | noise<br>(pptv) | random<br>(pptv) | syst<br>(pptv) | total<br>(pptv) |
|------------------|-----------------------|------------------|---------------|-----------------|------------------|----------------|-------------------|-----------------|-----------------|------------------|----------------|-----------------|
| 5                | 538.27                | 3.76             | 3.04          | 0.41            | 9.76             | 5.67           | 21.78             | 7.45            | 17.00           | 23.29            | 20.68          | 31.14           |
| 8                | 525.48                | 1.88             | 4.33          | 0.39            | 5.57             | 5.03           | 23.52             | 7.13            | 11.51           | 16.69            | 23.17          | 28.55           |
| 11               | 530.90                | 1.96             | 2.96          | 0.19            | 6.00             | 7.28           | 22.91             | 8.24            | 11.89           | 17.30            | 23.17          | 28.91           |
| 14               | 483.41                | 0.54             | 2.46          | 0.48            | 5.22             | 6.88           | 27.08             | 8.36            | 11.37           | 16.68            | 27.11          | 31.84           |
| 17               | 406.97                | 0.58             | 6.92          | 1.00            | 5.17             | 5.99           | 28.32             | 8.12            | 11.88           | 16.11            | 29.35          | 33.48           |
| 20               | 295.02                | 0.40             | 8.25          | 0.66            | 5.38             | 3.69           | 25.82             | 5.39            | 14.03           | 17.57            | 26.37          | 31.68           |
| 23               | 209.74                | 0.51             | 1.49          | 0.33            | 5.92             | 2.51           | 16.77             | 3.23            | 17.56           | 19.25            | 16.53          | 25.38           |
| 26               | 147.21                | 0.54             | 1.57          | 0.24            | 7.57             | 1.64           | 12.27             | 2.05            | 21.95           | 23.86            | 11.39          | 26.44           |
| 29               | 114.43                | 0.60             | 1.60          | 0.14            | 10.81            | 1.33           | 10.47             | 1.61            | 26.53           | 29.14            | 9.39           | 30.62           |
| 32               | 53.40                 | 0.32             | 1.32          | 0.20            | 10.32            | 0.68           | 7.90              | 1.22            | 28.63           | 30.84            | 6.42           | 31.50           |
| 35               | 9.15                  | 0.15             | 0.71          | 0.25            | 7.47             | 0.42           | 3.88              | 0.79            | 30.59           | 31.68            | 2.19           | 31.75           |
| 38               | 9.21                  | 0.15             | 0.31          | 0.22            | 6.89             | 0.48           | 1.36              | 0.53            | 33.95           | 34.67            | 0.77           | 34.68           |
| 41               | 15.16                 | 0.14             | 0.33          | 0.20            | 8.81             | 0.51           | 1.40              | 0.50            | 36.45           | 37.52            | 0.92           | 37.53           |

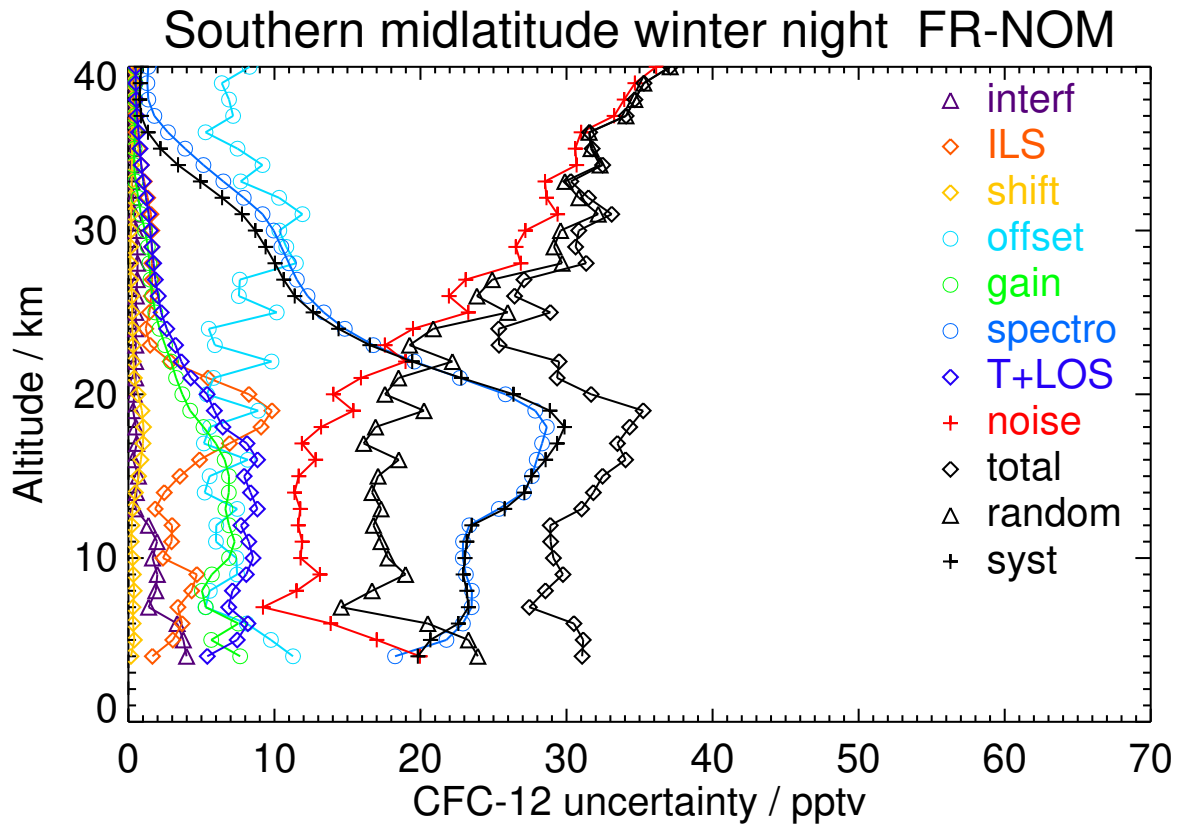

**Figure S20.** V8H\_F-12\_61 Southern midlatitude winter night

**Table S22.** CFC-12 error budget for Southern midlatitude spring day. All uncertainties are  $1\sigma$ .

| altitude<br>(km) | mean target<br>(pptv) | interf<br>(pptv) | ILS<br>(pptv) | shift<br>(pptv) | offset<br>(pptv) | gain<br>(pptv) | spectro<br>(pptv) | T+LOS<br>(pptv) | noise<br>(pptv) | random<br>(pptv) | syst<br>(pptv) | total<br>(pptv) |
|------------------|-----------------------|------------------|---------------|-----------------|------------------|----------------|-------------------|-----------------|-----------------|------------------|----------------|-----------------|
| 8                | 548.39                | 1.59             | 3.08          | 0.35            | 5.38             | 6.25           | 27.07             | 6.68            | 8.97            | 13.76            | 27.36          | 30.63           |
| 11               | 504.87                | 1.12             | 2.11          | 0.23            | 6.90             | 6.79           | 27.74             | 8.52            | 10.64           | 16.89            | 27.74          | 32.48           |
| 14               | 450.09                | 0.55             | 5.72          | 0.56            | 7.05             | 5.50           | 28.52             | 8.56            | 10.82           | 18.36            | 27.93          | 33.43           |
| 17               | 364.52                | 0.62             | 9.53          | 0.97            | 7.46             | 5.01           | 30.18             | 7.65            | 11.56           | 19.44            | 29.97          | 35.72           |
| 20               | 251.31                | 0.53             | 8.01          | 1.15            | 8.09             | 3.05           | 22.80             | 4.65            | 13.58           | 20.45            | 21.17          | 29.43           |
| 23               | 194.35                | 0.65             | 1.64          | 0.46            | 8.97             | 2.63           | 14.25             | 2.57            | 16.67           | 20.67            | 12.29          | 24.05           |
| 26               | 163.69                | 0.71             | 2.08          | 0.15            | 9.89             | 2.43           | 12.64             | 1.89            | 20.20           | 23.78            | 10.69          | 26.07           |
| 29               | 126.01                | 0.87             | 2.20          | 0.20            | 11.39            | 1.70           | 12.13             | 1.77            | 23.66           | 27.30            | 10.17          | 29.13           |
| 32               | 49.93                 | 0.28             | 1.35          | 0.24            | 9.33             | 0.63           | 7.47              | 1.19            | 23.82           | 26.00            | 6.16           | 26.72           |
| 35               | 10.65                 | 0.15             | 0.52          | 0.29            | 8.27             | 0.53           | 2.68              | 0.53            | 26.05           | 27.41            | 1.97           | 27.48           |
| 38               | 0.80                  | 0.14             | 0.26          | 0.28            | 7.45             | 0.63           | 1.63              | 0.44            | 29.49           | 30.44            | 1.30           | 30.47           |
| 41               | -2.57                 | 0.13             | 0.31          | 0.24            | 7.51             | 0.76           | 1.65              | 0.40            | 32.18           | 33.07            | 1.43           | 33.10           |

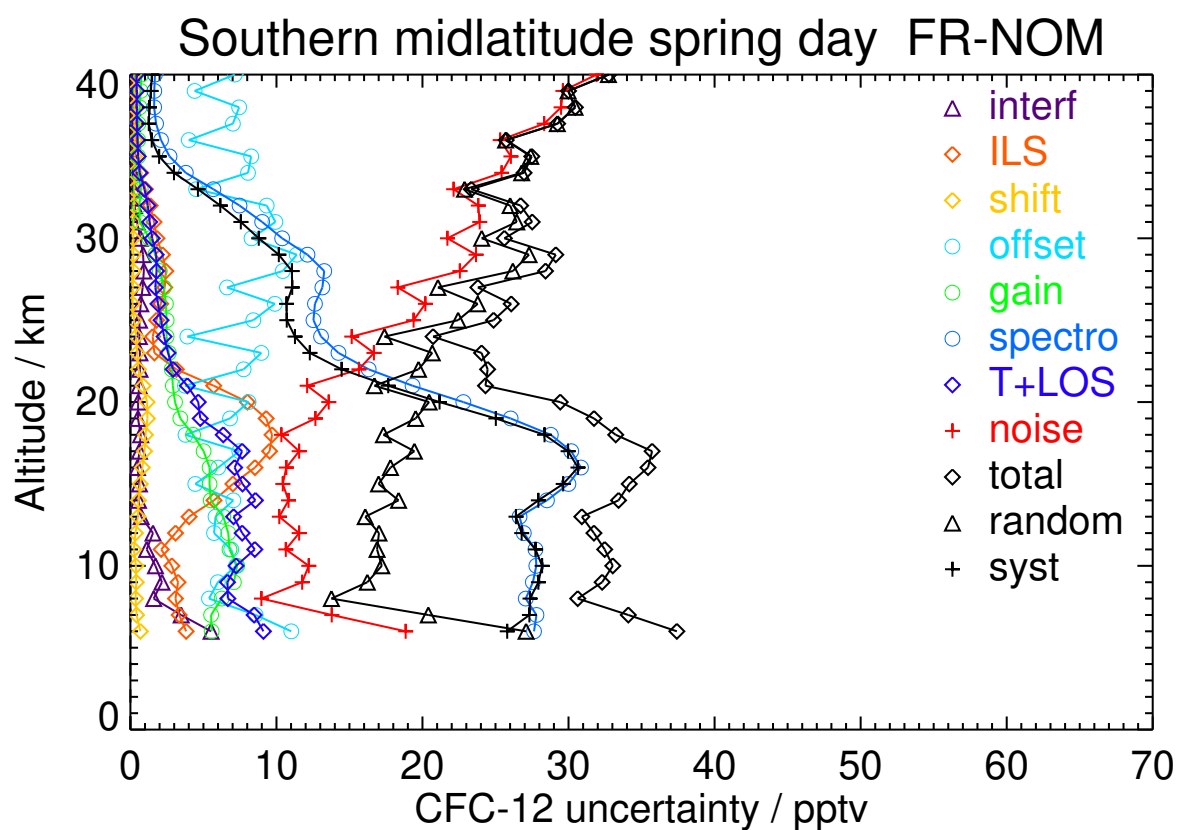

**Figure S21.** V8H\_F-12\_61 Southern midlatitude spring day

**Table S23.** CFC-12 error budget for Southern midlatitude spring night. All uncertainties are  $1\sigma$ .

| altitude<br>(km) | mean target<br>(pptv) | interf<br>(pptv) | ILS<br>(pptv) | shift<br>(pptv) | offset<br>(pptv) | gain<br>(pptv) | spectro<br>(pptv) | T+LOS<br>(pptv) | noise<br>(pptv) | random<br>(pptv) | syst<br>(pptv) | total<br>(pptv) |
|------------------|-----------------------|------------------|---------------|-----------------|------------------|----------------|-------------------|-----------------|-----------------|------------------|----------------|-----------------|
| 8                | 541.28                | 1.30             | 3.26          | 0.39            | 4.96             | 5.38           | 25.20             | 6.55            | 8.64            | 13.72            | 25.11          | 28.61           |
| 11               | 502.22                | 1.24             | 2.07          | 0.28            | 6.29             | 5.99           | 24.91             | 7.79            | 9.83            | 15.54            | 24.85          | 29.31           |
| 14               | 462.12                | 0.51             | 5.21          | 0.42            | 6.56             | 6.71           | 28.37             | 8.06            | 10.09           | 17.06            | 28.22          | 32.97           |
| 17               | 370.40                | 0.59             | 7.93          | 0.81            | 7.11             | 5.98           | 26.11             | 7.52            | 10.75           | 16.44            | 27.09          | 31.69           |
| 20               | 291.00                | 0.53             | 8.05          | 1.20            | 7.81             | 3.99           | 20.92             | 4.46            | 12.59           | 17.56            | 21.24          | 27.56           |
| 23               | 245.60                | 0.63             | 1.57          | 0.25            | 8.97             | 3.17           | 15.00             | 2.67            | 15.76           | 19.15            | 14.40          | 23.96           |
| 26               | 233.46                | 0.64             | 1.56          | 0.21            | 10.30            | 2.47           | 14.48             | 2.22            | 19.20           | 22.37            | 14.07          | 26.43           |
| 29               | 181.41                | 0.73             | 2.38          | 0.24            | 11.81            | 2.19           | 15.06             | 2.19            | 23.56           | 26.74            | 14.91          | 30.61           |
| 32               | 89.00                 | 0.15             | 1.45          | 0.26            | 9.04             | 0.72           | 10.17             | 1.58            | 23.48           | 25.50            | 9.57           | 27.24           |
| 35               | 21.36                 | 0.11             | 0.88          | 0.26            | 8.87             | 0.43           | 4.68              | 0.73            | 27.31           | 28.88            | 3.78           | 29.12           |
| 38               | -1.57                 | 0.13             | 0.30          | 0.29            | 7.48             | 0.53           | 1.58              | 0.46            | 30.63           | 31.56            | 1.13           | 31.58           |
| 41               | 3.61                  | 0.15             | 0.32          | 0.27            | 7.57             | 0.85           | 2.04              | 0.48            | 33.34           | 34.23            | 1.58           | 34.26           |

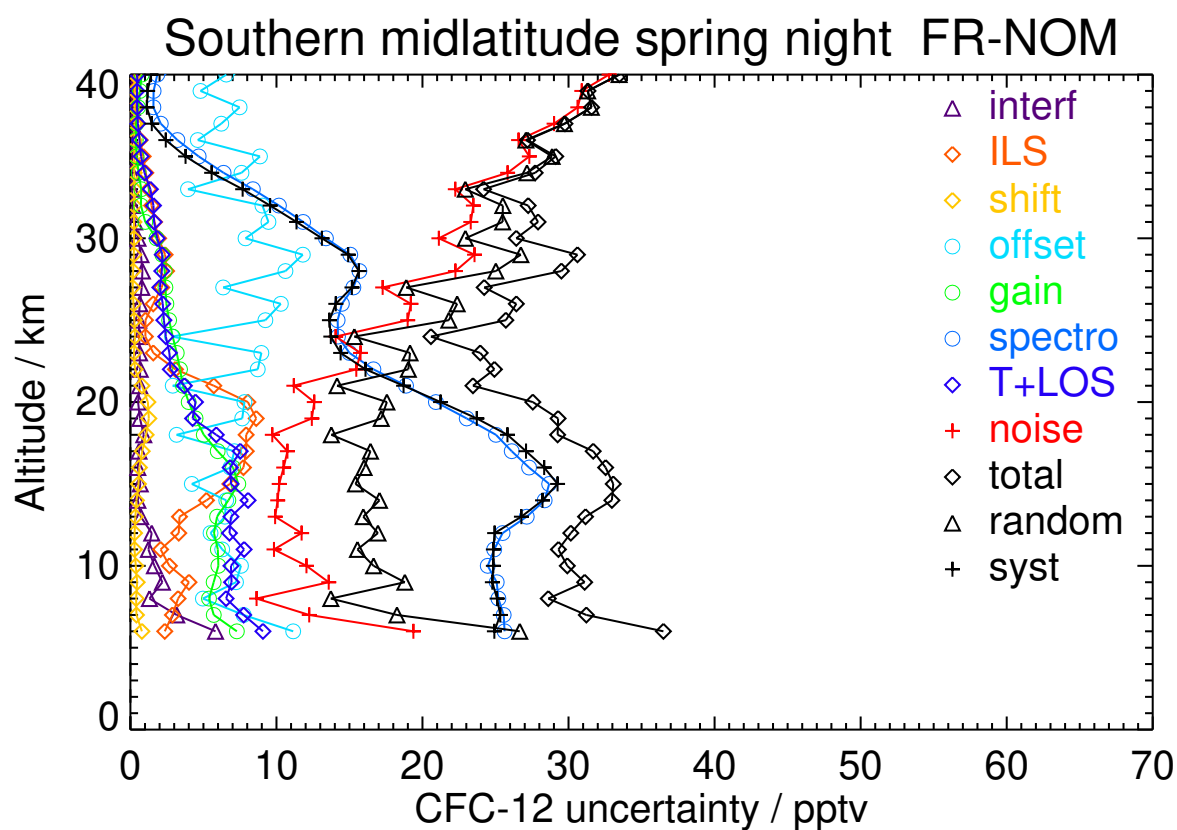

**Figure S22.** V8H\_F-12\_61 Southern midlatitude spring night

**Table S24.** CFC-12 error budget for Southern midlatitude summer day. All uncertainties are  $1\sigma$ .

| altitude<br>(km) | mean target<br>(pptv) | interf<br>(pptv) | ILS<br>(pptv) | shift<br>(pptv) | offset<br>(pptv) | gain<br>(pptv) | spectro<br>(pptv) | T+LOS<br>(pptv) | noise<br>(pptv) | random<br>(pptv) | syst<br>(pptv) | total<br>(pptv) |
|------------------|-----------------------|------------------|---------------|-----------------|------------------|----------------|-------------------|-----------------|-----------------|------------------|----------------|-----------------|
| 5                | 541.80                | 4.53             | 2.91          | 0.47            | 9.43             | 9.12           | 24.94             | 6.36            | 18.26           | 22.83            | 26.01          | 34.60           |
| 8                | 535.30                | 1.62             | 3.47          | 0.41            | 4.16             | 5.05           | 27.08             | 5.76            | 9.53            | 12.77            | 27.42          | 30.25           |
| 11               | 509.67                | 1.43             | 2.30          | 0.17            | 5.01             | 7.79           | 22.62             | 7.30            | 10.45           | 14.80            | 23.41          | 27.70           |
| 14               | 471.23                | 0.44             | 1.91          | 0.42            | 4.70             | 5.76           | 25.11             | 7.43            | 10.36           | 14.60            | 25.28          | 29.20           |
| 17               | 412.59                | 0.65             | 7.54          | 0.95            | 4.49             | 5.69           | 27.58             | 7.67            | 10.46           | 14.54            | 28.78          | 32.24           |
| 20               | 290.38                | 0.51             | 10.71         | 0.67            | 4.48             | 3.22           | 24.03             | 5.42            | 11.73           | 14.60            | 26.02          | 29.84           |
| 23               | 205.87                | 0.72             | 1.10          | 0.84            | 5.03             | 2.71           | 14.70             | 3.21            | 14.49           | 16.03            | 14.64          | 21.71           |
| 26               | 135.98                | 0.73             | 2.28          | 0.47            | 6.03             | 1.68           | 11.41             | 2.10            | 17.73           | 19.04            | 11.46          | 22.22           |
| 29               | 78.71                 | 0.87             | 1.23          | 0.15            | 8.53             | 0.84           | 6.70              | 1.29            | 21.37           | 23.12            | 6.67           | 24.06           |
| 32               | 44.60                 | 0.44             | 0.55          | 0.24            | 7.72             | 0.67           | 3.49              | 0.68            | 22.71           | 24.06            | 3.17           | 24.27           |
| 35               | 21.96                 | 0.15             | 0.40          | 0.38            | 5.50             | 0.72           | 2.74              | 0.48            | 23.51           | 24.21            | 2.41           | 24.33           |
| 38               | -1.05                 | 0.16             | 0.25          | 0.27            | 5.33             | 0.85           | 1.73              | 0.40            | 26.94           | 27.49            | 1.61           | 27.54           |
| 41               | -0.52                 | 0.16             | 0.32          | 0.25            | 5.95             | 0.99           | 1.74              | 0.38            | 28.92           | 29.54            | 1.81           | 29.60           |

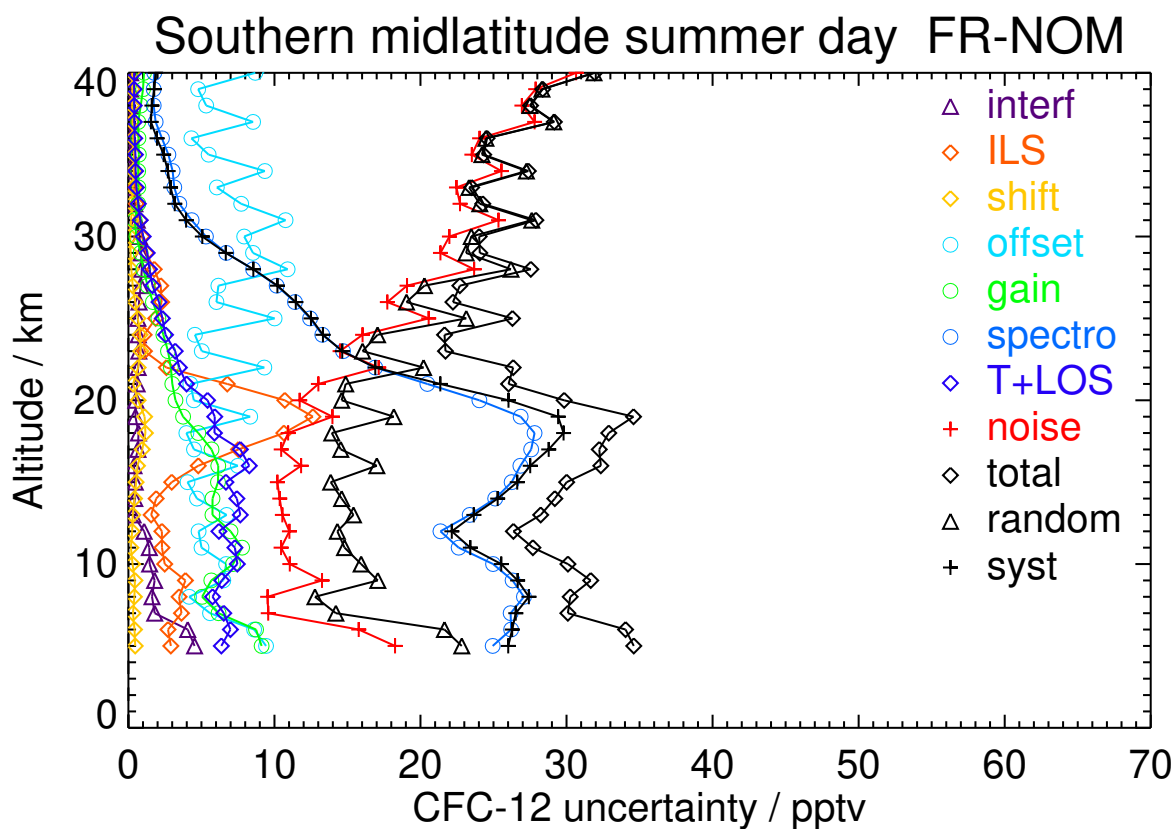

**Figure S23.** V8H\_F-12\_61 Southern midlatitude summer day

**Table S25.** CFC-12 error budget for Southern midlatitude summer night. All uncertainties are  $1\sigma$ .

| altitude<br>(km) | mean target<br>(pptv) | interf<br>(pptv) | ILS<br>(pptv) | shift<br>(pptv) | offset<br>(pptv) | gain<br>(pptv) | spectro<br>(pptv) | T+LOS<br>(pptv) | noise<br>(pptv) | random<br>(pptv) | syst<br>(pptv) | total<br>(pptv) |
|------------------|-----------------------|------------------|---------------|-----------------|------------------|----------------|-------------------|-----------------|-----------------|------------------|----------------|-----------------|
| 5                | 547.09                | 6.48             | 6.13          | 0.56            | 10.96            | 11.67          | 23.27             | 8.40            | 20.76           | 28.76            | 23.49          | 37.14           |
| 8                | 536.56                | 3.76             | 5.26          | 0.43            | 8.50             | 4.30           | 26.53             | 7.89            | 15.77           | 22.06            | 25.70          | 33.87           |
| 11               | 514.48                | 1.90             | 4.86          | 0.38            | 5.83             | 6.28           | 23.39             | 6.56            | 12.04           | 16.33            | 23.86          | 28.92           |
| 14               | 491.76                | 0.90             | 3.24          | 0.49            | 4.62             | 6.82           | 30.06             | 7.28            | 10.89           | 15.87            | 30.04          | 33.98           |
| 17               | 429.71                | 0.75             | 10.47         | 1.27            | 4.09             | 5.92           | 32.68             | 7.68            | 11.06           | 15.75            | 34.13          | 37.59           |
| 20               | 299.42                | 0.56             | 10.60         | 0.64            | 3.97             | 3.68           | 26.66             | 5.50            | 12.13           | 14.82            | 28.48          | 32.10           |
| 23               | 209.23                | 0.70             | 0.92          | 1.04            | 4.50             | 2.98           | 15.68             | 3.38            | 14.67           | 16.23            | 15.51          | 22.45           |
| 26               | 137.02                | 0.74             | 2.46          | 0.30            | 5.46             | 1.66           | 11.15             | 2.14            | 17.92           | 19.00            | 11.32          | 22.12           |
| 29               | 91.05                 | 0.88             | 1.36          | 0.14            | 8.32             | 0.97           | 7.46              | 1.41            | 21.25           | 23.00            | 7.26           | 24.12           |
| 32               | 44.69                 | 0.43             | 0.71          | 0.22            | 7.58             | 0.63           | 4.22              | 0.80            | 22.35           | 23.70            | 3.84           | 24.01           |
| 35               | 19.24                 | 0.15             | 0.37          | 0.39            | 5.24             | 0.73           | 2.67              | 0.51            | 23.33           | 23.96            | 2.37           | 24.08           |
| 38               | -3.68                 | 0.16             | 0.25          | 0.26            | 5.13             | 0.82           | 1.75              | 0.43            | 26.73           | 27.25            | 1.57           | 27.29           |
| 41               | -0.26                 | 0.16             | 0.26          | 0.24            | 5.88             | 1.00           | 1.60              | 0.38            | 28.37           | 28.99            | 1.66           | 29.04           |

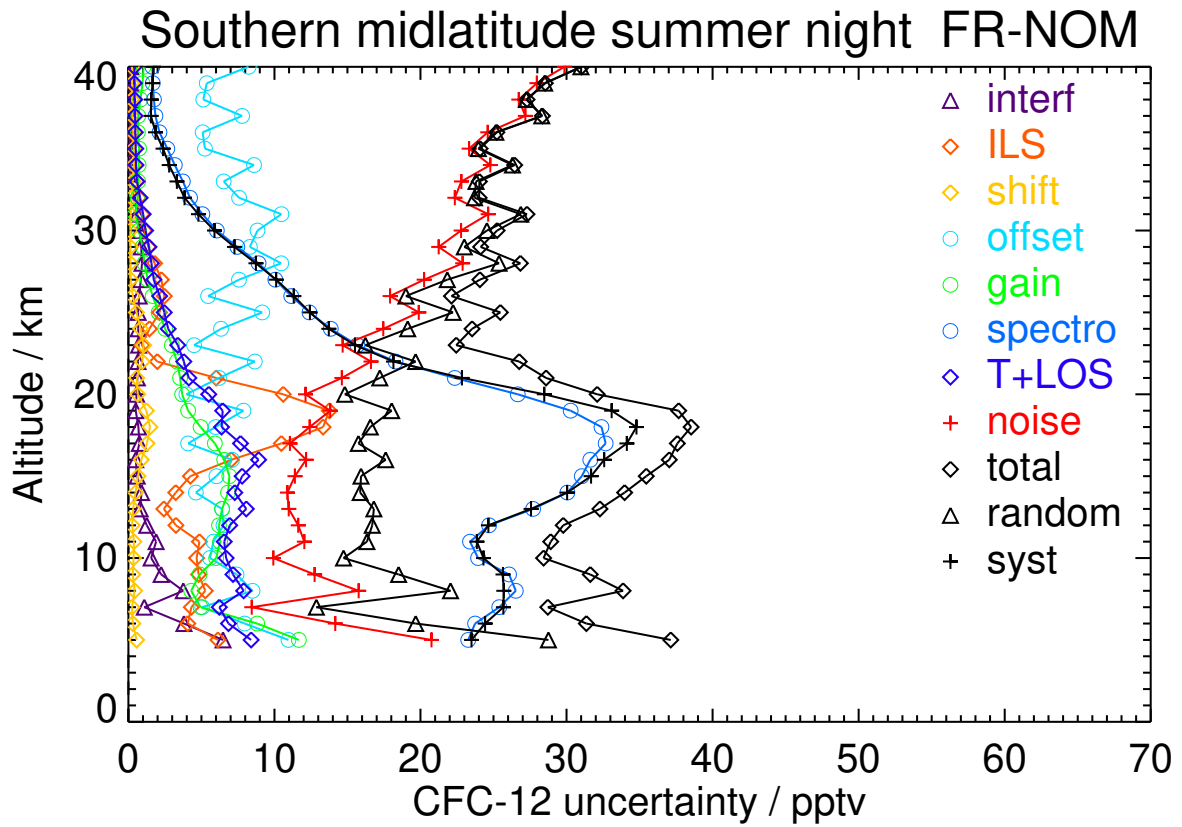

**Figure S24.** V8H\_F-12\_61 Southern midlatitude summer night

**Table S26.** CFC-12 error budget for Southern midlatitude autumn day. All uncertainties are  $1\sigma$ .

| altitude<br>(km) | mean target<br>(pptv) | interf<br>(pptv) | ILS<br>(pptv) | shift<br>(pptv) | offset<br>(pptv) | gain<br>(pptv) | spectro<br>(pptv) | T+LOS<br>(pptv) | noise<br>(pptv) | random<br>(pptv) | syst<br>(pptv) | total<br>(pptv) |
|------------------|-----------------------|------------------|---------------|-----------------|------------------|----------------|-------------------|-----------------|-----------------|------------------|----------------|-----------------|
| 5                | 555.00                | 2.76             | 4.72          | 0.21            | 8.73             | 5.90           | 24.35             | 5.77            | 14.11           | 17.81            | 25.47          | 31.08           |
| 8                | 535.99                | 3.50             | 3.76          | 0.55            | 8.53             | 5.24           | 26.96             | 7.28            | 13.60           | 19.23            | 26.87          | 33.04           |
| 11               | 524.52                | 1.83             | 3.16          | 0.29            | 7.51             | 6.44           | 23.85             | 6.74            | 12.07           | 16.82            | 24.25          | 29.52           |
| 14               | 498.34                | 0.64             | 3.12          | 0.45            | 6.43             | 7.03           | 28.09             | 7.11            | 10.54           | 15.93            | 28.25          | 32.43           |
| 17               | 413.37                | 0.54             | 10.15         | 1.70            | 6.60             | 6.28           | 32.69             | 6.11            | 11.41           | 15.77            | 34.30          | 37.75           |
| 20               | 295.70                | 0.47             | 4.97          | 0.50            | 7.28             | 4.22           | 25.38             | 4.20            | 13.62           | 17.33            | 25.36          | 30.71           |
| 23               | 192.15                | 0.56             | 1.59          | 0.52            | 8.09             | 2.69           | 16.51             | 2.84            | 16.98           | 19.64            | 16.10          | 25.39           |
| 26               | 124.53                | 0.55             | 1.97          | 0.12            | 8.37             | 1.48           | 11.24             | 1.75            | 20.57           | 22.55            | 10.97          | 25.08           |
| 29               | 74.57                 | 0.61             | 1.54          | 0.11            | 11.08            | 1.01           | 8.19              | 1.20            | 24.78           | 27.45            | 7.46           | 28.45           |
| 32               | 33.87                 | 0.26             | 0.71          | 0.17            | 10.07            | 0.30           | 4.34              | 0.59            | 26.19           | 28.20            | 3.42           | 28.41           |
| 35               | 23.04                 | 0.10             | 0.41          | 0.26            | 6.16             | 0.44           | 2.75              | 0.53            | 28.11           | 28.86            | 1.86           | 28.92           |
| 38               | 3.38                  | 0.09             | 0.34          | 0.22            | 6.47             | 0.50           | 2.15              | 0.49            | 32.27           | 32.95            | 1.77           | 32.99           |
| 41               | -10.80                | 0.10             | 0.25          | 0.20            | 8.79             | 0.45           | 1.57              | 0.39            | 34.93           | 36.04            | 1.25           | 36.06           |

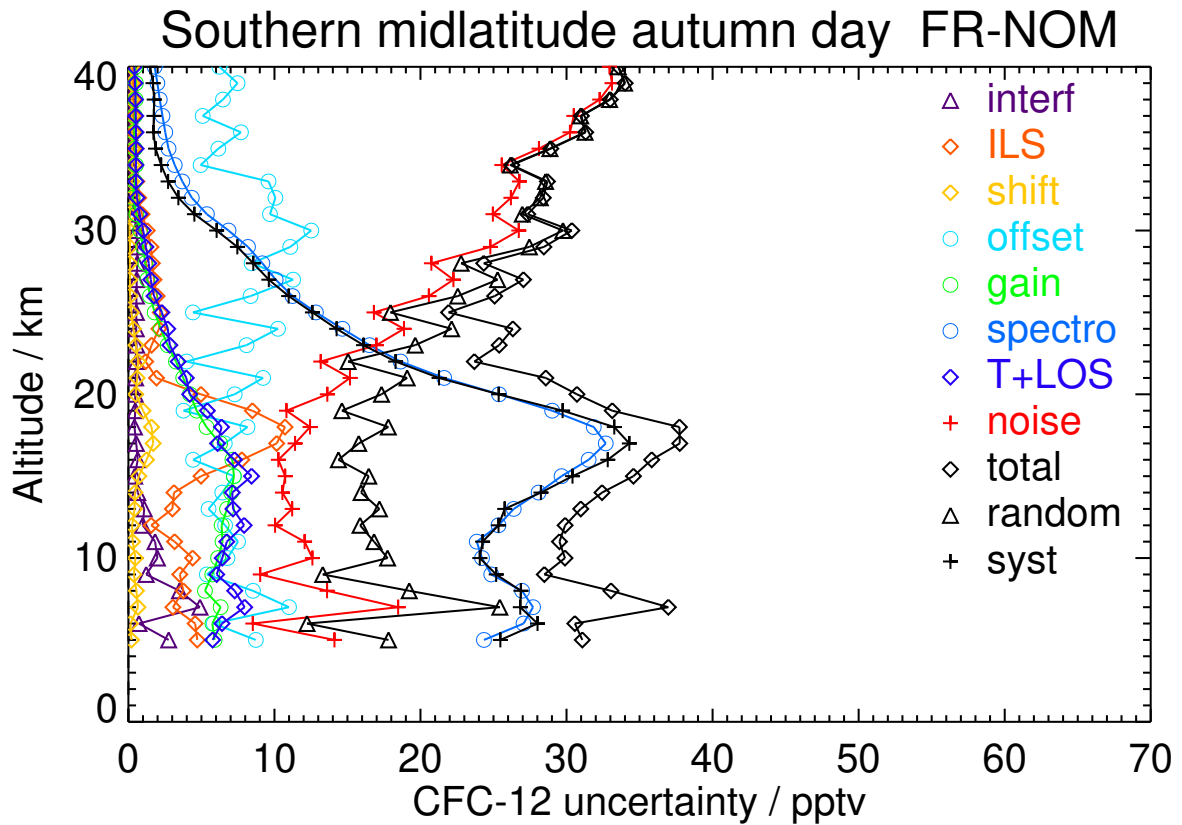

**Figure S25.** V8H\_F-12\_61 Southern midlatitude autumn day

**Table S27.** CFC-12 error budget for Southern midlatitude autumn night. All uncertainties are  $1\sigma$ .

| altitude<br>(km) | mean target<br>(pptv) | interf<br>(pptv) | ILS<br>(pptv) | shift<br>(pptv) | offset<br>(pptv) | gain<br>(pptv) | spectro<br>(pptv) | T+LOS<br>(pptv) | noise<br>(pptv) | random<br>(pptv) | syst<br>(pptv) | total<br>(pptv) |
|------------------|-----------------------|------------------|---------------|-----------------|------------------|----------------|-------------------|-----------------|-----------------|------------------|----------------|-----------------|
| 8                | 537.63                | 1.58             | 4.81          | 0.35            | 6.48             | 5.94           | 24.93             | 6.39            | 9.42            | 15.86            | 24.54          | 29.22           |
| 11               | 532.26                | 1.64             | 3.00          | 0.28            | 8.03             | 6.14           | 24.81             | 7.56            | 11.61           | 17.85            | 24.55          | 30.35           |
| 14               | 516.21                | 0.58             | 2.76          | 0.28            | 7.92             | 7.27           | 27.92             | 7.91            | 11.16           | 17.13            | 28.22          | 33.02           |
| 17               | 443.87                | 0.37             | 11.93         | 1.94            | 8.58             | 6.10           | 37.60             | 6.66            | 12.48           | 18.01            | 39.32          | 43.25           |
| 20               | 318.50                | 0.50             | 3.85          | 0.44            | 9.28             | 4.48           | 26.92             | 4.50            | 14.95           | 19.54            | 26.61          | 33.02           |
| 23               | 213.94                | 0.53             | 1.57          | 0.57            | 9.95             | 2.93           | 17.25             | 3.10            | 18.16           | 21.41            | 17.01          | 27.34           |
| 26               | 143.95                | 0.58             | 2.06          | 0.19            | 9.86             | 1.63           | 13.05             | 2.01            | 21.42           | 23.97            | 12.76          | 27.16           |
| 29               | 74.77                 | 0.70             | 1.57          | 0.15            | 11.34            | 0.97           | 8.89              | 1.34            | 25.12           | 27.89            | 8.18           | 29.06           |
| 32               | 31.54                 | 0.30             | 0.68          | 0.16            | 10.09            | 0.29           | 4.49              | 0.67            | 26.12           | 28.18            | 3.30           | 28.38           |
| 35               | 11.61                 | 0.11             | 0.35          | 0.25            | 6.33             | 0.43           | 2.53              | 0.51            | 27.73           | 28.54            | 1.13           | 28.57           |
| 38               | 11.63                 | 0.12             | 0.26          | 0.26            | 6.43             | 0.58           | 1.95              | 0.48            | 31.82           | 32.50            | 1.32           | 32.53           |
| 41               | 1.16                  | 0.13             | 0.27          | 0.23            | 7.73             | 0.53           | 1.93              | 0.38            | 33.67           | 34.59            | 1.36           | 34.61           |

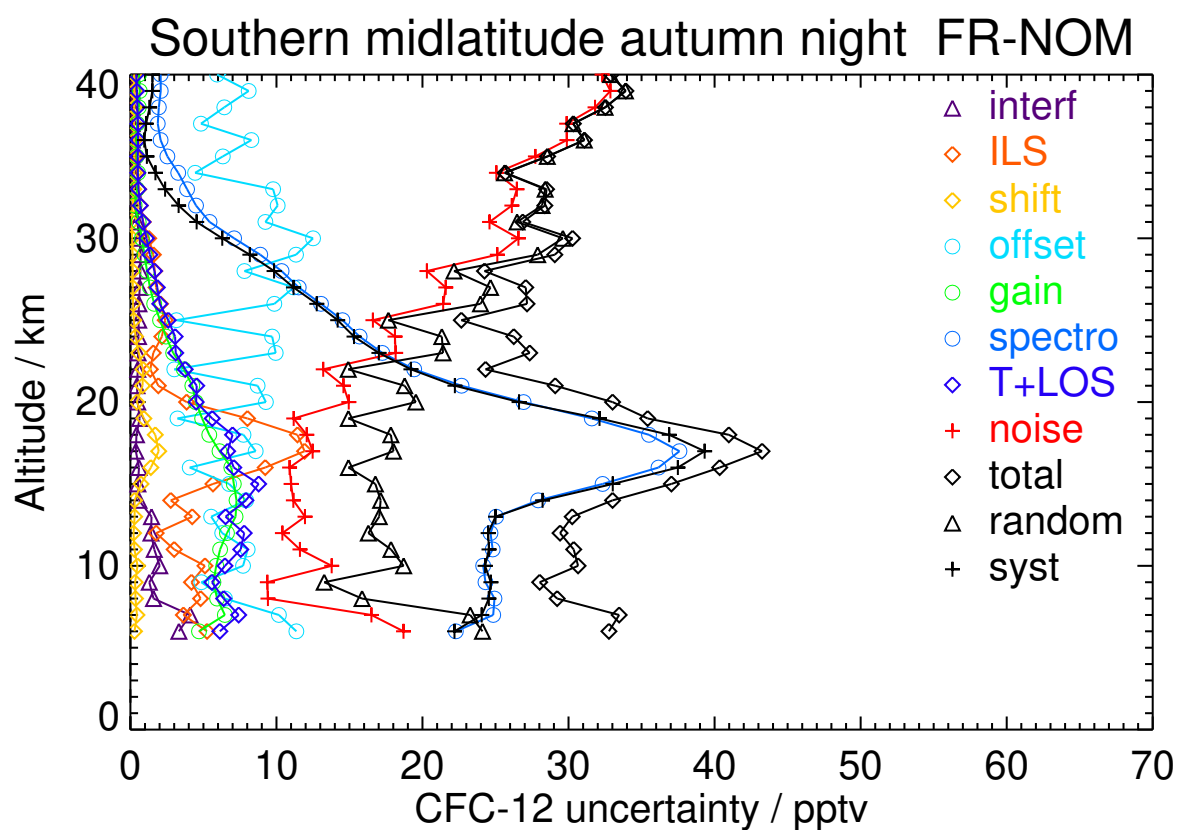

**Figure S26.** V8H\_F-12\_61 Southern midlatitude autumn night

**Table S28.** CFC-12 error budget for Southern polar winter day. All uncertainties are  $1\sigma$ .

| altitude<br>(km) | mean target<br>(pptv) | interf<br>(pptv) | ILS<br>(pptv) | shift<br>(pptv) | offset<br>(pptv) | gain<br>(pptv) | spectro<br>(pptv) | T+LOS<br>(pptv) | noise<br>(pptv) | random<br>(pptv) | syst<br>(pptv) | total<br>(pptv) |
|------------------|-----------------------|------------------|---------------|-----------------|------------------|----------------|-------------------|-----------------|-----------------|------------------|----------------|-----------------|
| 8                | 537.65                | 2.68             | 1.88          | 0.31            | 13.02            | 3.23           | 28.96             | 11.35           | 21.77           | 29.92            | 27.15          | 40.41           |
| 11               | 519.26                | 0.64             | 5.06          | 0.58            | 6.19             | 7.48           | 29.66             | 9.44            | 12.89           | 20.15            | 29.14          | 35.43           |
| 14               | 392.55                | 0.33             | 9.21          | 0.45            | 5.52             | 4.99           | 44.95             | 13.46           | 12.92           | 21.58            | 45.21          | 50.09           |
| 17               | 196.76                | 0.36             | 6.88          | 0.56            | 5.01             | 2.99           | 28.72             | 9.42            | 14.71           | 19.15            | 29.07          | 34.81           |
| 20               | 78.70                 | 0.35             | 3.83          | 0.44            | 5.93             | 1.15           | 15.45             | 4.29            | 18.94           | 20.98            | 15.07          | 25.83           |
| 23               | 19.33                 | 0.41             | 0.73          | 0.13            | 7.23             | 0.30           | 4.71              | 1.33            | 24.18           | 25.47            | 3.61           | 25.72           |
| 26               | 19.61                 | 0.55             | 0.44          | 0.11            | 9.60             | 0.18           | 2.37              | 0.62            | 28.02           | 29.71            | 0.97           | 29.73           |
| 29               | 13.37                 | 0.63             | 0.45          | 0.11            | 13.16            | 0.25           | 1.89              | 0.71            | 31.20           | 33.92            | 0.90           | 33.93           |
| 32               | -0.08                 | 0.38             | 0.36          | 0.12            | 11.27            | 0.17           | 1.40              | 0.66            | 32.51           | 34.44            | 0.71           | 34.45           |
| 35               | -3.34                 | 0.16             | 0.44          | 0.17            | 7.13             | 0.23           | 1.54              | 0.59            | 33.47           | 34.26            | 0.65           | 34.27           |
| 38               | -6.97                 | 0.11             | 0.35          | 0.18            | 6.54             | 0.29           | 1.09              | 0.52            | 36.06           | 36.67            | 0.54           | 36.67           |
| 41               | -6.23                 | 0.09             | 0.39          | 0.15            | 9.04             | 0.31           | 0.98              | 0.53            | 37.80           | 38.88            | 0.53           | 38.88           |

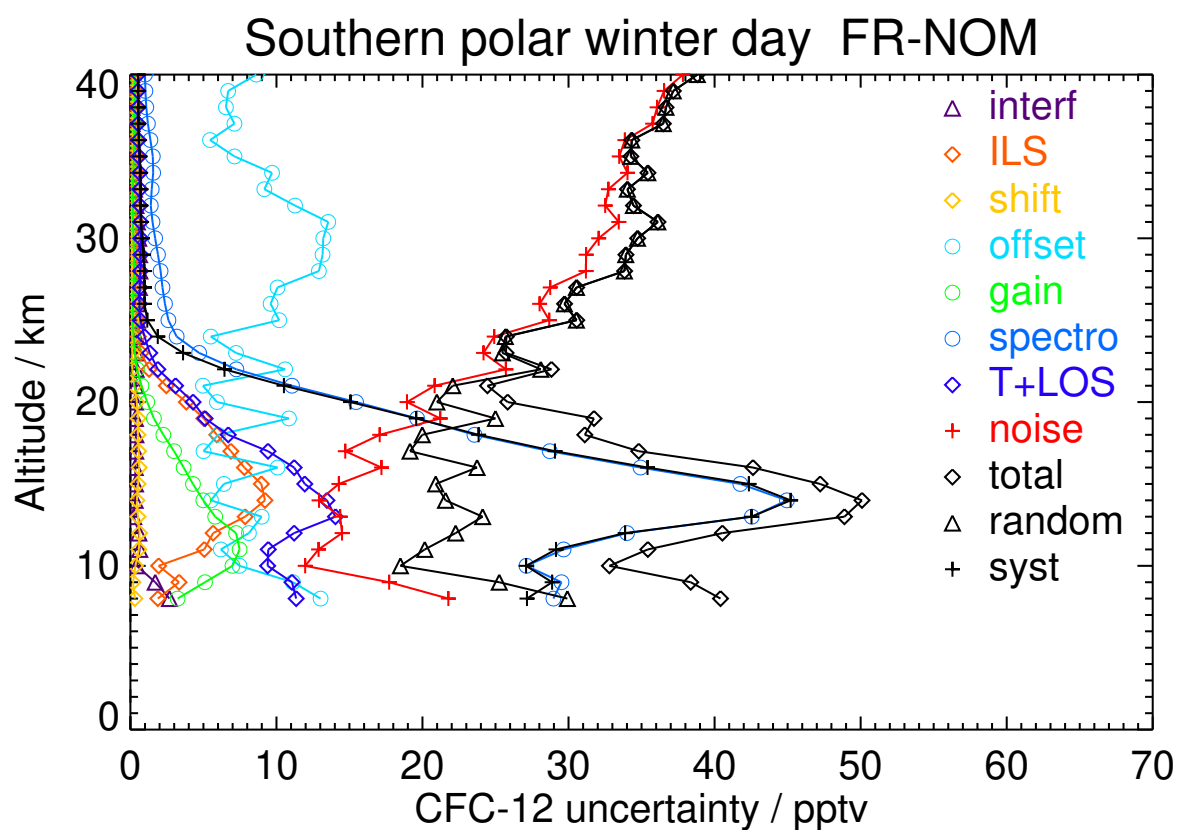

**Figure S27.** V8H\_F-12\_61 Southern polar winter day

**Table S29.** CFC-12 error budget for Southern polar winter night. All uncertainties are  $1\sigma$ .

| altitude<br>(km) | mean target<br>(pptv) | interf<br>(pptv) | ILS<br>(pptv) | shift<br>(pptv) | offset<br>(pptv) | gain<br>(pptv) | spectro<br>(pptv) | T+LOS<br>(pptv) | noise<br>(pptv) | random<br>(pptv) | syst<br>(pptv) | total<br>(pptv) |
|------------------|-----------------------|------------------|---------------|-----------------|------------------|----------------|-------------------|-----------------|-----------------|------------------|----------------|-----------------|
| 5                | 550.06                | 4.05             | 2.20          | 0.32            | 10.41            | 6.73           | 28.02             | 9.27            | 17.38           | 25.90            | 26.03          | 36.72           |
| 8                | 524.18                | 2.00             | 2.98          | 0.22            | 8.41             | 8.37           | 22.46             | 8.03            | 15.04           | 22.29            | 21.27          | 30.81           |
| 11               | 527.10                | 0.89             | 2.16          | 0.29            | 6.39             | 7.32           | 21.95             | 8.55            | 13.12           | 18.75            | 21.80          | 28.75           |
| 14               | 424.42                | 0.33             | 6.98          | 0.67            | 5.25             | 7.13           | 35.15             | 11.02           | 12.98           | 19.73            | 35.55          | 40.66           |
| 17               | 226.92                | 0.34             | 6.72          | 0.42            | 4.99             | 3.58           | 26.07             | 8.13            | 14.26           | 18.19            | 26.48          | 32.13           |
| 20               | 124.84                | 0.32             | 3.98          | 0.22            | 5.39             | 1.49           | 16.18             | 3.88            | 18.19           | 19.90            | 16.09          | 25.59           |
| 23               | 51.28                 | 0.36             | 1.56          | 0.12            | 6.59             | 0.76           | 9.59              | 2.00            | 23.78           | 25.03            | 9.02           | 26.61           |
| 26               | 4.57                  | 0.43             | 0.83          | 0.09            | 9.32             | 0.34           | 4.29              | 0.97            | 28.71           | 30.37            | 3.05           | 30.52           |
| 29               | -6.03                 | 0.52             | 0.50          | 0.10            | 14.36            | 0.16           | 2.32              | 0.76            | 33.07           | 36.14            | 0.50           | 36.14           |
| 32               | 3.14                  | 0.39             | 0.51          | 0.10            | 14.77            | 0.19           | 1.95              | 0.79            | 35.35           | 38.37            | 0.64           | 38.38           |
| 35               | 3.00                  | 0.19             | 0.57          | 0.17            | 9.40             | 0.21           | 1.84              | 0.77            | 36.28           | 37.53            | 0.60           | 37.54           |
| 38               | 0.54                  | 0.13             | 0.67          | 0.21            | 7.79             | 0.27           | 1.88              | 0.69            | 38.03           | 38.87            | 0.61           | 38.88           |
| 41               | -0.27                 | 0.12             | 0.57          | 0.17            | 11.16            | 0.31           | 1.50              | 0.64            | 39.74           | 41.31            | 0.72           | 41.31           |

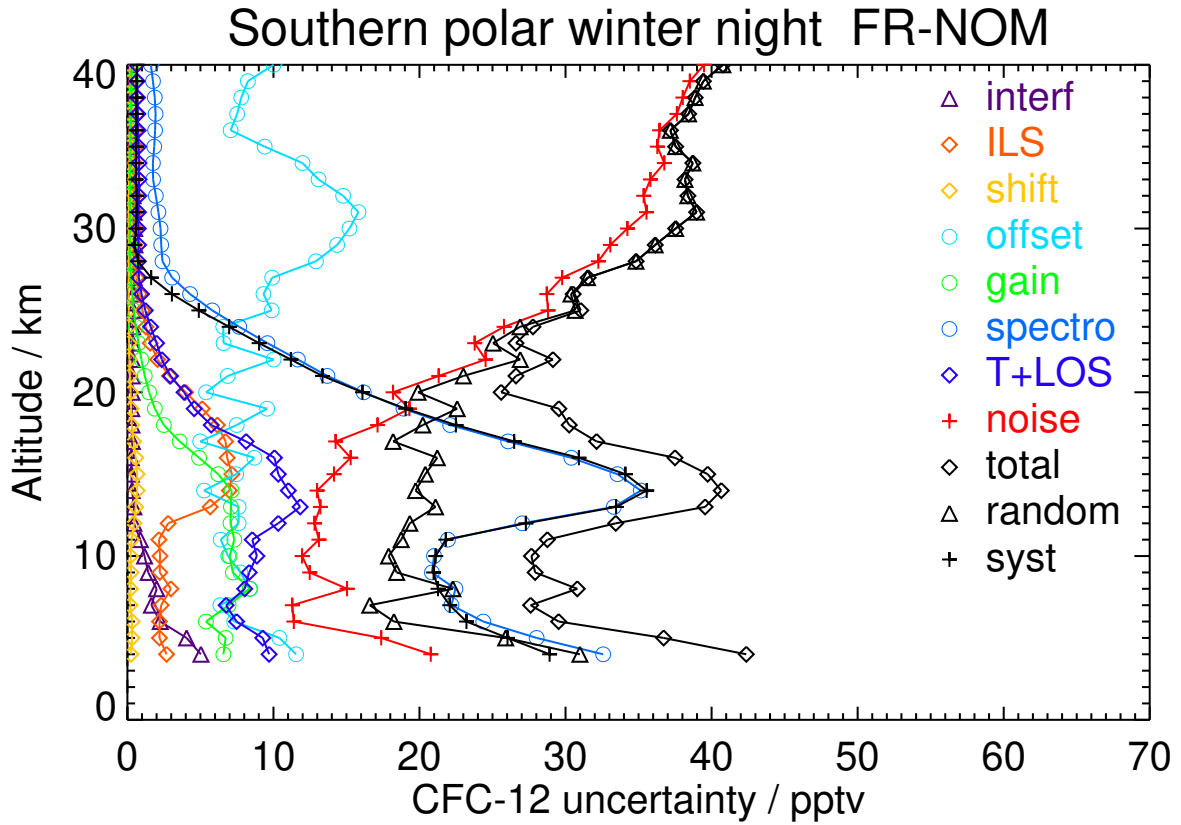

**Figure S28.** V8H\_F-12\_61 Southern polar winter night

**Table S30.** CFC-12 error budget for Southern polar spring day. All uncertainties are  $1\sigma$ .

| altitude<br>(km) | mean target<br>(pptv) | interf<br>(pptv) | ILS<br>(pptv) | shift<br>(pptv) | offset<br>(pptv) | gain<br>(pptv) | spectro<br>(pptv) | T+LOS<br>(pptv) | noise<br>(pptv) | random<br>(pptv) | syst<br>(pptv) | total<br>(pptv) |
|------------------|-----------------------|------------------|---------------|-----------------|------------------|----------------|-------------------|-----------------|-----------------|------------------|----------------|-----------------|
| 8                | 549.22                | 1.08             | 3.43          | 0.38            | 5.61             | 8.50           | 23.63             | 7.46            | 9.90            | 15.59            | 24.20          | 28.79           |
| 11               | 532.17                | 0.81             | 7.37          | 1.37            | 8.63             | 5.92           | 32.59             | 13.50           | 13.52           | 22.34            | 33.08          | 39.92           |
| 14               | 389.03                | 0.30             | 22.84         | 1.42            | 8.89             | 2.70           | 46.53             | 15.04           | 14.49           | 23.67            | 51.49          | 56.67           |
| 17               | 130.75                | 0.37             | 17.41         | 1.36            | 9.77             | 0.66           | 25.50             | 7.10            | 15.76           | 20.54            | 30.46          | 36.74           |
| 20               | 19.38                 | 0.62             | 2.52          | 0.61            | 10.18            | 0.62           | 4.67              | 1.85            | 17.36           | 20.57            | 3.83           | 20.92           |
| 23               | -3.45                 | 0.85             | 1.23          | 0.21            | 10.34            | 0.36           | 2.56              | 0.94            | 19.62           | 22.31            | 2.01           | 22.40           |
| 26               | 11.90                 | 1.09             | 0.96          | 0.23            | 10.98            | 0.29           | 2.42              | 0.73            | 21.83           | 24.58            | 1.36           | 24.62           |
| 29               | 13.72                 | 1.34             | 0.96          | 0.22            | 11.99            | 0.43           | 2.40              | 0.66            | 24.33           | 27.27            | 1.08           | 27.29           |
| 32               | 9.08                  | 0.31             | 0.57          | 0.28            | 9.31             | 0.69           | 1.85              | 0.56            | 22.90           | 24.78            | 1.34           | 24.81           |
| 35               | -1.69                 | 0.18             | 0.30          | 0.35            | 9.11             | 0.85           | 1.01              | 0.44            | 24.93           | 26.56            | 1.04           | 26.58           |
| 38               | 6.88                  | 0.19             | 0.21          | 0.27            | 8.74             | 0.93           | 1.36              | 0.40            | 27.63           | 29.00            | 1.36           | 29.03           |
| 41               | -4.17                 | 0.17             | 0.30          | 0.25            | 8.92             | 1.07           | 1.56              | 0.36            | 31.12           | 32.39            | 1.68           | 32.43           |

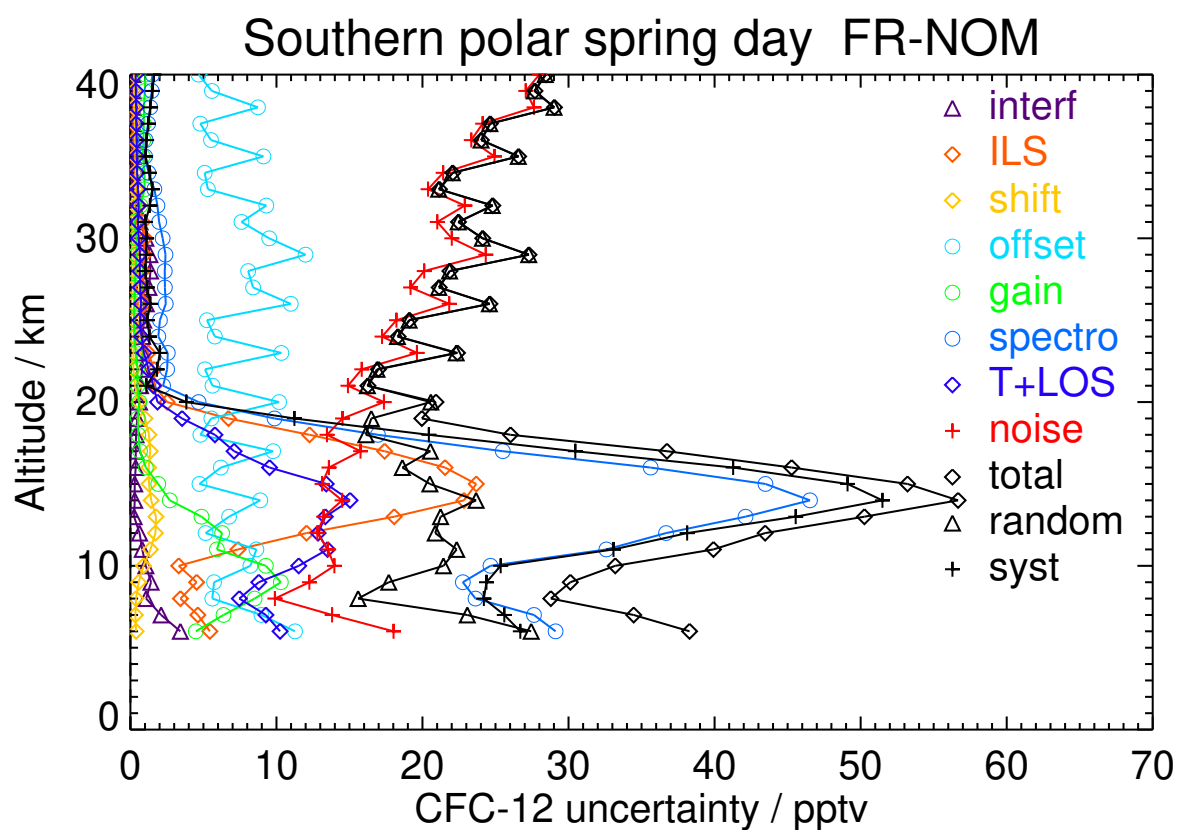

**Figure S29.** V8H\_F-12\_61 Southern polar spring day

**Table S31.** CFC-12 error budget for Southern polar spring night. All uncertainties are  $1\sigma$ .

| altitude<br>(km) | mean target<br>(pptv) | interf<br>(pptv) | ILS<br>(pptv) | shift<br>(pptv) | offset<br>(pptv) | gain<br>(pptv) | spectro<br>(pptv) | T+LOS<br>(pptv) | noise<br>(pptv) | random<br>(pptv) | syst<br>(pptv) | total<br>(pptv) |
|------------------|-----------------------|------------------|---------------|-----------------|------------------|----------------|-------------------|-----------------|-----------------|------------------|----------------|-----------------|
| 8                | 546.34                | 1.23             | 2.67          | 0.30            | 5.04             | 7.65           | 21.27             | 6.63            | 9.38            | 14.03            | 21.92          | 26.02           |
| 11               | 527.80                | 1.06             | 4.22          | 0.53            | 7.53             | 6.29           | 29.73             | 11.47           | 11.90           | 19.70            | 29.73          | 35.67           |
| 14               | 392.67                | 0.45             | 17.33         | 0.93            | 7.72             | 4.62           | 41.34             | 12.93           | 12.54           | 23.56            | 43.14          | 49.16           |
| 17               | 190.98                | 0.48             | 12.40         | 1.50            | 8.47             | 2.42           | 24.17             | 7.43            | 13.97           | 20.63            | 25.35          | 32.69           |
| 20               | 96.18                 | 0.57             | 5.22          | 1.06            | 9.45             | 1.59           | 11.19             | 2.63            | 16.44           | 20.79            | 9.51           | 22.86           |
| 23               | 76.80                 | 0.79             | 1.33          | 0.34            | 10.41            | 1.21           | 7.08              | 1.43            | 19.49           | 23.06            | 3.59           | 23.34           |
| 26               | 76.20                 | 0.97             | 1.45          | 0.31            | 11.46            | 1.64           | 8.81              | 1.29            | 22.10           | 26.22            | 4.18           | 26.55           |
| 29               | 48.98                 | 1.17             | 1.94          | 0.28            | 12.38            | 1.02           | 8.39              | 1.20            | 25.04           | 29.03            | 3.93           | 29.30           |
| 32               | 14.99                 | 0.25             | 0.89          | 0.31            | 9.46             | 0.63           | 3.71              | 0.67            | 23.58           | 25.62            | 2.18           | 25.71           |
| 35               | 6.16                  | 0.18             | 0.39          | 0.32            | 8.93             | 0.73           | 1.60              | 0.47            | 25.69           | 27.25            | 1.12           | 27.27           |
| 38               | -2.85                 | 0.18             | 0.30          | 0.27            | 8.24             | 0.77           | 1.68              | 0.40            | 28.43           | 29.63            | 1.41           | 29.66           |
| 41               | -9.63                 | 0.15             | 0.36          | 0.22            | 8.37             | 0.85           | 1.58              | 0.34            | 31.39           | 32.51            | 1.37           | 32.54           |

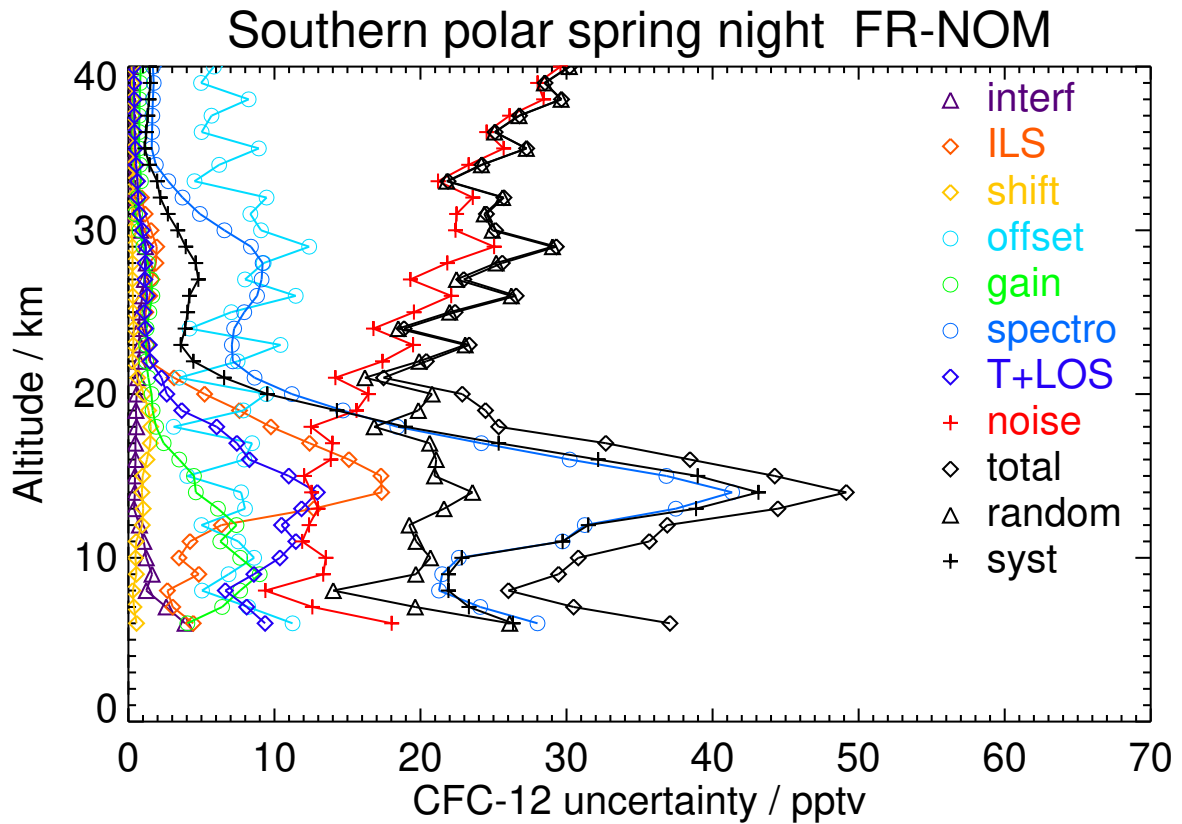

**Figure S30.** V8H\_F-12\_61 Southern polar spring night

**Table S32.** CFC-12 error budget for Southern polar summer day. All uncertainties are  $1\sigma$ .

| altitude<br>(km) | mean target<br>(pptv) | interf<br>(pptv) | ILS<br>(pptv) | shift<br>(pptv) | offset<br>(pptv) | gain<br>(pptv) | spectro<br>(pptv) | T+LOS<br>(pptv) | noise<br>(pptv) | random<br>(pptv) | syst<br>(pptv) | total<br>(pptv) |
|------------------|-----------------------|------------------|---------------|-----------------|------------------|----------------|-------------------|-----------------|-----------------|------------------|----------------|-----------------|
| 5                | 547.47                | 4.58             | 3.43          | 0.56            | 10.00            | 6.21           | 23.61             | 7.83            | 18.85           | 24.05            | 23.82          | 33.85           |
| 8                | 534.76                | 2.11             | 2.28          | 0.59            | 4.95             | 6.33           | 26.20             | 6.44            | 11.35           | 15.17            | 26.48          | 30.52           |
| 11               | 490.26                | 1.32             | 3.02          | 0.23            | 4.98             | 6.07           | 22.57             | 6.95            | 10.82           | 14.71            | 23.04          | 27.34           |
| 14               | 449.34                | 0.49             | 3.02          | 0.22            | 4.62             | 6.12           | 26.49             | 7.21            | 10.09           | 13.85            | 27.05          | 30.39           |
| 17               | 370.83                | 0.83             | 9.00          | 0.77            | 4.36             | 5.18           | 26.20             | 7.13            | 9.71            | 13.51            | 27.88          | 30.98           |
| 20               | 260.94                | 0.62             | 8.36          | 1.09            | 4.68             | 2.99           | 21.08             | 4.59            | 10.91           | 13.17            | 22.65          | 26.21           |
| 23               | 168.48                | 0.72             | 0.84          | 0.85            | 5.60             | 2.53           | 12.79             | 2.59            | 13.69           | 15.25            | 12.83          | 19.93           |
| 26               | 116.04                | 0.78             | 1.85          | 0.32            | 7.62             | 1.46           | 9.27              | 1.64            | 17.34           | 19.20            | 9.22           | 21.30           |
| 29               | 68.17                 | 0.97             | 1.07          | 0.14            | 9.44             | 0.72           | 5.68              | 1.08            | 21.68           | 23.77            | 5.49           | 24.40           |
| 32               | 41.12                 | 0.22             | 0.63          | 0.31            | 7.38             | 0.65           | 3.38              | 0.59            | 20.79           | 22.13            | 3.07           | 22.34           |
| 35               | 15.40                 | 0.18             | 0.36          | 0.30            | 7.55             | 0.60           | 2.06              | 0.44            | 23.71           | 24.93            | 1.53           | 24.98           |
| 38               | 11.69                 | 0.17             | 0.25          | 0.25            | 7.36             | 0.77           | 1.59              | 0.46            | 26.87           | 27.88            | 1.49           | 27.92           |
| 41               | -5.40                 | 0.17             | 0.41          | 0.26            | 7.73             | 1.09           | 1.73              | 0.38            | 29.08           | 30.11            | 1.85           | 30.16           |

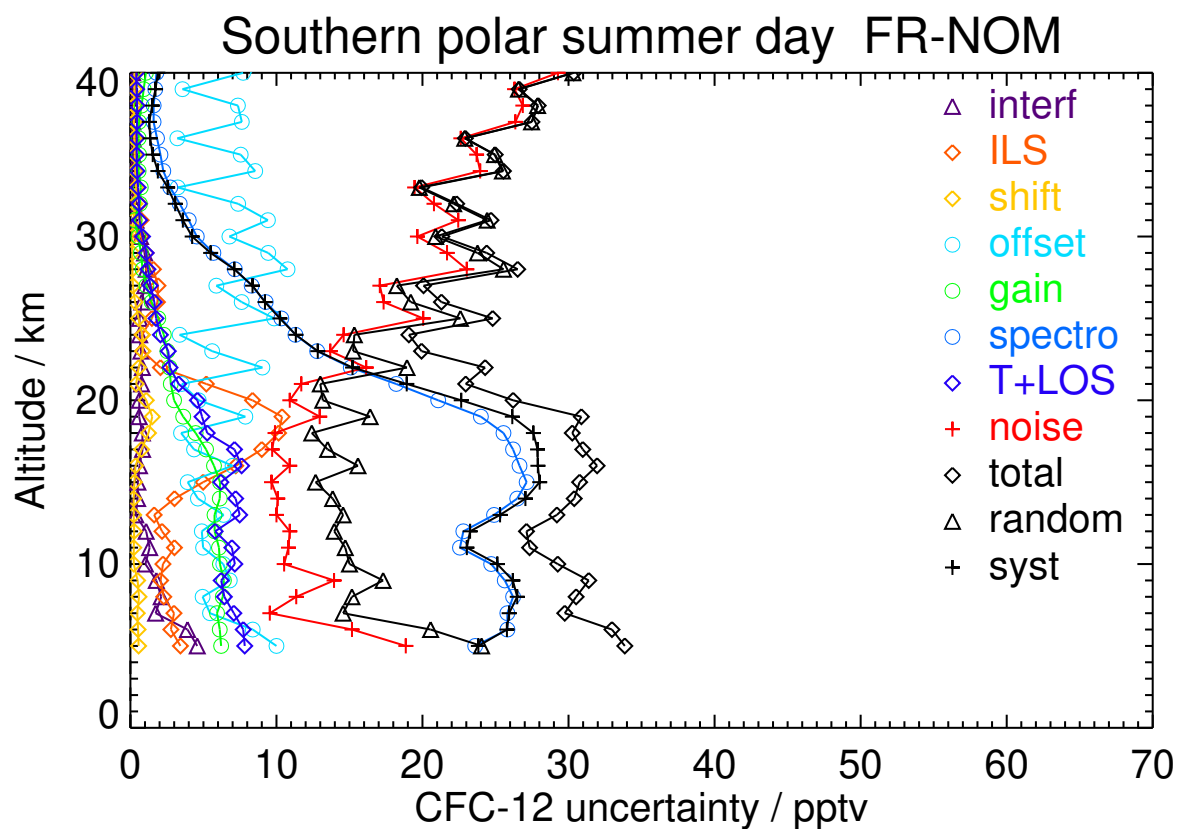

**Figure S31.** V8H\_F-12\_61 Southern polar summer day

**Table S33.** CFC-12 error budget for Southern polar summer night. All uncertainties are  $1\sigma$ .

| altitude<br>(km) | mean target<br>(pptv) | interf<br>(pptv) | ILS<br>(pptv) | shift<br>(pptv) | offset<br>(pptv) | gain<br>(pptv) | spectro<br>(pptv) | T+LOS<br>(pptv) | noise<br>(pptv) | random<br>(pptv) | syst<br>(pptv) | total<br>(pptv) |
|------------------|-----------------------|------------------|---------------|-----------------|------------------|----------------|-------------------|-----------------|-----------------|------------------|----------------|-----------------|
| 5                | 535.30                | 2.36             | 5.27          | 0.11            | 9.74             | 4.52           | 20.83             | 6.62            | 17.33           | 21.10            | 21.94          | 30.44           |
| 8                | 542.43                | 5.34             | 2.45          | 0.60            | 10.13            | 4.53           | 29.36             | 9.63            | 20.07           | 25.87            | 29.09          | 38.93           |
| 11               | 500.32                | 2.40             | 4.41          | 0.20            | 6.64             | 6.86           | 21.05             | 6.61            | 14.01           | 17.94            | 21.85          | 28.27           |
| 14               | 467.86                | 0.66             | 2.91          | 0.35            | 4.46             | 5.46           | 29.13             | 6.88            | 10.98           | 14.18            | 29.56          | 32.79           |
| 17               | 387.24                | 1.01             | 8.52          | 1.38            | 3.43             | 5.72           | 27.50             | 6.11            | 10.14           | 12.99            | 29.12          | 31.89           |
| 20               | 264.72                | 0.58             | 6.99          | 0.88            | 2.93             | 3.67           | 23.13             | 4.22            | 11.28           | 12.91            | 24.20          | 27.43           |
| 23               | 177.34                | 0.70             | 0.74          | 0.85            | 3.09             | 2.85           | 13.99             | 2.55            | 14.22           | 15.07            | 14.03          | 20.59           |
| 26               | 105.46                | 0.64             | 2.09          | 0.20            | 3.43             | 1.44           | 10.41             | 1.80            | 17.85           | 18.43            | 10.46          | 21.19           |
| 29               | 49.81                 | 0.81             | 1.04          | 0.09            | 8.10             | 0.38           | 5.57              | 1.05            | 21.73           | 23.32            | 5.30           | 23.92           |
| 32               | 23.96                 | 0.46             | 0.35          | 0.12            | 8.99             | 0.32           | 2.36              | 0.46            | 24.20           | 25.86            | 1.89           | 25.93           |
| 35               | 6.66                  | 0.10             | 0.31          | 0.34            | 4.33             | 0.60           | 1.82              | 0.41            | 23.72           | 24.15            | 1.40           | 24.19           |
| 38               | -6.88                 | 0.13             | 0.18          | 0.28            | 4.54             | 0.62           | 1.03              | 0.42            | 27.78           | 28.16            | 0.99           | 28.18           |
| 41               | -2.29                 | 0.14             | 0.22          | 0.18            | 5.32             | 0.76           | 1.26              | 0.40            | 29.76           | 30.24            | 1.28           | 30.27           |

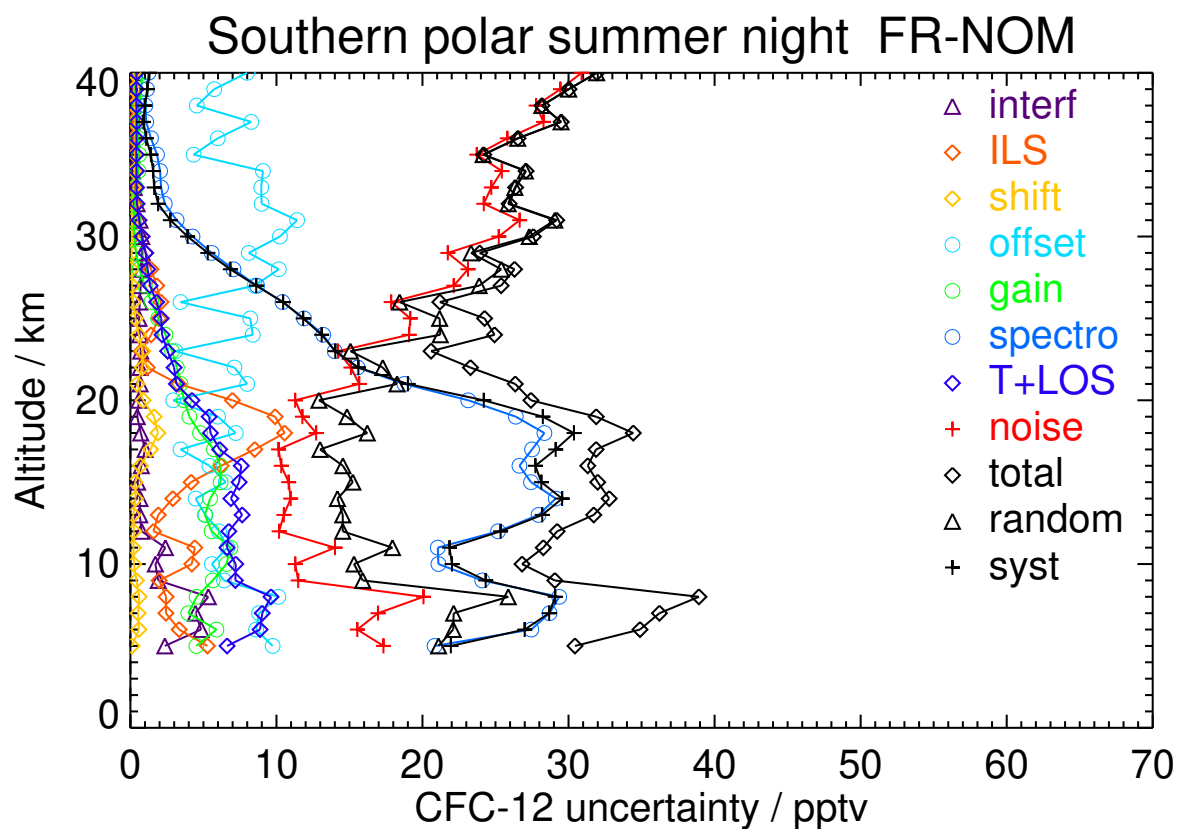

**Figure S32.** V8H\_F-12\_61 Southern polar summer night

**Table S34.** CFC-12 error budget for Southern polar autumn day. All uncertainties are  $1\sigma$ .

| altitude<br>(km) | mean target<br>(pptv) | interf<br>(pptv) | ILS<br>(pptv) | shift<br>(pptv) | offset<br>(pptv) | gain<br>(pptv) | spectro<br>(pptv) | T+LOS<br>(pptv) | noise<br>(pptv) | random<br>(pptv) | syst<br>(pptv) | total<br>(pptv) |
|------------------|-----------------------|------------------|---------------|-----------------|------------------|----------------|-------------------|-----------------|-----------------|------------------|----------------|-----------------|
| 5                | 530.53                | 2.49             | 4.02          | 0.31            | 8.51             | 7.81           | 26.34             | 5.90            | 13.02           | 17.06            | 27.62          | 32.46           |
| 8                | 535.59                | 3.08             | 1.69          | 0.65            | 8.32             | 5.85           | 27.28             | 7.72            | 13.20           | 19.31            | 26.86          | 33.08           |
| 11               | 503.49                | 1.01             | 2.26          | 0.35            | 7.11             | 6.24           | 24.74             | 6.43            | 10.54           | 15.49            | 24.91          | 29.33           |
| 14               | 460.14                | 0.30             | 4.02          | 0.58            | 7.07             | 7.48           | 30.05             | 7.44            | 10.40           | 15.11            | 31.00          | 34.48           |
| 17               | 325.56                | 0.55             | 9.21          | 1.32            | 7.85             | 5.60           | 31.30             | 5.73            | 12.07           | 16.15            | 32.82          | 36.58           |
| 20               | 200.18                | 0.46             | 3.36          | 0.27            | 8.74             | 3.32           | 19.44             | 3.14            | 15.24           | 18.38            | 19.52          | 26.81           |
| 23               | 117.14                | 0.47             | 1.18          | 0.14            | 9.16             | 1.85           | 12.03             | 1.96            | 19.29           | 21.73            | 11.73          | 24.69           |
| 26               | 59.04                 | 0.44             | 1.34          | 0.10            | 8.65             | 0.77           | 7.20              | 1.10            | 22.81           | 24.51            | 7.06           | 25.51           |
| 29               | 30.48                 | 0.47             | 0.78          | 0.04            | 11.89            | 0.31           | 4.09              | 0.67            | 27.32           | 29.90            | 3.44           | 30.10           |
| 32               | 5.36                  | 0.23             | 0.43          | 0.10            | 11.17            | 0.14           | 2.24              | 0.49            | 29.47           | 31.57            | 1.43           | 31.60           |
| 35               | -5.24                 | 0.08             | 0.25          | 0.18            | 6.01             | 0.17           | 1.34              | 0.50            | 31.33           | 31.93            | 0.61           | 31.93           |
| 38               | -8.34                 | 0.07             | 0.25          | 0.19            | 6.88             | 0.23           | 1.22              | 0.47            | 35.65           | 36.33            | 0.63           | 36.33           |
| 41               | 4.43                  | 0.10             | 0.23          | 0.15            | 10.14            | 0.25           | 1.21              | 0.37            | 38.57           | 39.89            | 0.70           | 39.90           |

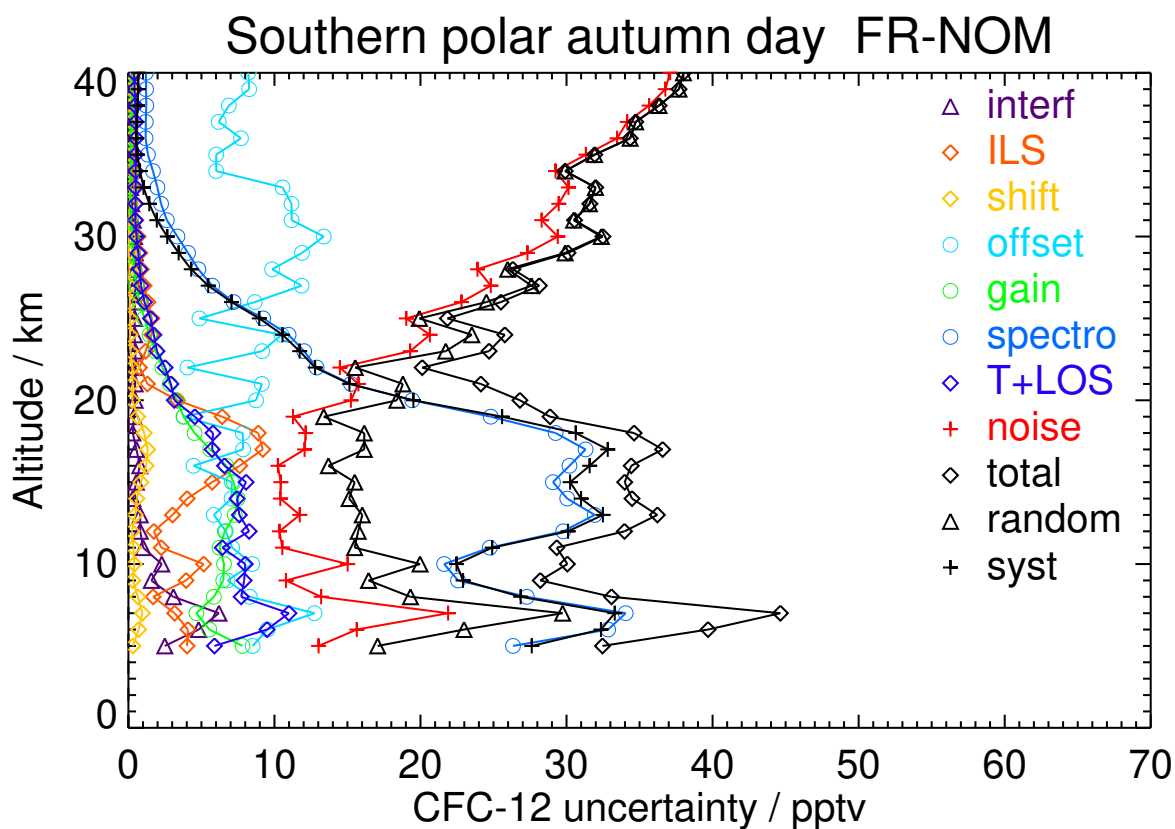

**Figure S33.** V8H\_F-12\_61 Southern polar autumn day

**Table S35.** CFC-12 error budget for Southern polar autumn night. All uncertainties are  $1\sigma$ .

| altitude<br>(km) | mean target<br>(pptv) | interf<br>(pptv) | ILS<br>(pptv) | shift<br>(pptv) | offset<br>(pptv) | gain<br>(pptv) | spectro<br>(pptv) | T+LOS<br>(pptv) | noise<br>(pptv) | random<br>(pptv) | syst<br>(pptv) | total<br>(pptv) |
|------------------|-----------------------|------------------|---------------|-----------------|------------------|----------------|-------------------|-----------------|-----------------|------------------|----------------|-----------------|
| 5                | 535.07                | 2.92             | 4.41          | 0.30            | 9.00             | 6.30           | 22.87             | 7.23            | 13.51           | 19.67            | 22.80          | 30.11           |
| 8                | 537.63                | 3.43             | 2.31          | 0.63            | 8.86             | 6.10           | 28.49             | 7.53            | 15.01           | 21.14            | 27.93          | 35.03           |
| 11               | 506.93                | 1.53             | 3.81          | 0.33            | 7.01             | 5.90           | 22.45             | 6.45            | 11.96           | 17.20            | 22.22          | 28.10           |
| 14               | 459.34                | 0.43             | 3.59          | 0.62            | 5.92             | 7.45           | 30.00             | 7.12            | 10.94           | 15.10            | 30.76          | 34.27           |
| 17               | 333.81                | 0.63             | 8.51          | 1.17            | 5.82             | 5.60           | 30.01             | 6.00            | 11.81           | 15.49            | 31.24          | 34.87           |
| 20               | 201.01                | 0.42             | 4.85          | 0.51            | 5.71             | 3.23           | 21.01             | 3.73            | 14.53           | 16.47            | 21.50          | 27.09           |
| 23               | 108.10                | 0.44             | 1.05          | 0.14            | 5.57             | 1.82           | 12.24             | 2.15            | 18.43           | 19.74            | 11.84          | 23.02           |
| 26               | 45.92                 | 0.40             | 1.26          | 0.13            | 6.04             | 0.77           | 7.08              | 1.23            | 22.58           | 23.60            | 6.56           | 24.50           |
| 29               | 15.21                 | 0.41             | 0.63          | 0.05            | 11.55            | 0.24           | 3.34              | 0.71            | 27.81           | 30.22            | 2.42           | 30.32           |
| 32               | 4.66                  | 0.26             | 0.32          | 0.08            | 12.09            | 0.12           | 1.81              | 0.49            | 31.38           | 33.67            | 0.87           | 33.68           |
| 35               | 7.39                  | 0.11             | 0.43          | 0.16            | 6.29             | 0.15           | 2.03              | 0.52            | 33.13           | 33.78            | 0.87           | 33.79           |
| 38               | 4.36                  | 0.11             | 0.50          | 0.18            | 7.74             | 0.16           | 1.93              | 0.54            | 37.29           | 38.13            | 0.92           | 38.14           |
| 41               | 2.08                  | 0.15             | 0.33          | 0.14            | 11.58            | 0.26           | 1.44              | 0.54            | 40.22           | 41.87            | 0.87           | 41.88           |

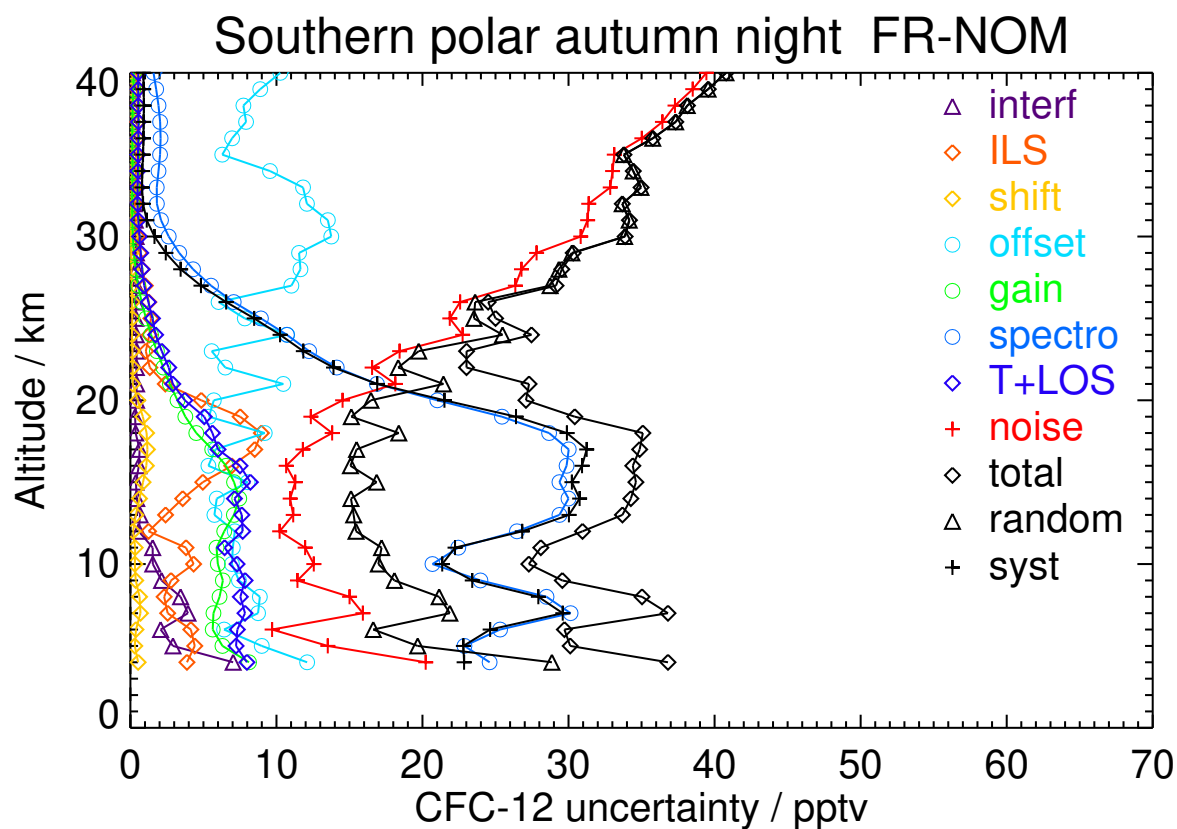

**Figure S34.** V8H\_F-12\_61 Southern polar autumn night

**Table S36.** CFC-12 error budget for Northern polar winter day. All uncertainties are  $1\sigma$ .

| altitude<br>(km) | mean target<br>(pptv) | interf<br>(pptv) | ILS<br>(pptv) | shift<br>(pptv) | offset<br>(pptv) | gain<br>(pptv) | spectro<br>(pptv) | T+LOS<br>(pptv) | noise<br>(pptv) | random<br>(pptv) | syst<br>(pptv) | total<br>(pptv) |
|------------------|-----------------------|------------------|---------------|-----------------|------------------|----------------|-------------------|-----------------|-----------------|------------------|----------------|-----------------|
| 8                | 545.07                | 2.44             | 4.31          | 0.47            | 2.48             | 4.89           | 25.52             | 11.49           | 15.41           | 20.69            | 25.45          | 32.80           |
| 11               | 496.34                | 0.69             | 3.75          | 0.41            | 3.12             | 6.25           | 30.27             | 8.36            | 12.33           | 16.90            | 30.27          | 34.67           |
| 14               | 404.73                | 0.59             | 9.98          | 0.58            | 3.80             | 5.53           | 30.09             | 7.08            | 13.65           | 19.62            | 30.04          | 35.88           |
| 17               | 299.22                | 0.68             | 6.64          | 0.37            | 3.01             | 4.91           | 24.71             | 5.06            | 14.36           | 19.32            | 23.39          | 30.34           |
| 20               | 247.13                | 0.64             | 4.68          | 0.32            | 1.34             | 3.94           | 19.17             | 3.09            | 15.21           | 20.98            | 14.42          | 25.46           |
| 23               | 200.02                | 0.62             | 3.28          | 0.17            | 3.08             | 3.64           | 15.25             | 1.64            | 17.74           | 19.43            | 14.36          | 24.16           |
| 26               | 147.51                | 0.58             | 1.75          | 0.15            | 3.10             | 1.66           | 12.09             | 1.28            | 19.80           | 20.91            | 10.87          | 23.57           |
| 29               | 101.96                | 0.56             | 1.44          | 0.32            | 5.82             | 1.30           | 9.54              | 0.81            | 23.41           | 24.53            | 8.71           | 26.03           |
| 32               | 51.56                 | 0.15             | 1.46          | 0.36            | 5.62             | 0.64           | 7.68              | 0.66            | 25.08           | 26.27            | 5.72           | 26.88           |
| 35               | 15.47                 | 0.09             | 0.78          | 0.36            | 5.90             | 0.39           | 3.93              | 0.48            | 29.78           | 30.52            | 2.60           | 30.63           |
| 38               | 6.76                  | 0.13             | 0.54          | 0.39            | 5.62             | 0.33           | 2.41              | 0.44            | 34.97           | 35.47            | 1.74           | 35.52           |
| 41               | 1.66                  | 0.13             | 0.51          | 0.45            | 9.04             | 0.27           | 2.28              | 0.47            | 40.21           | 41.26            | 1.63           | 41.29           |

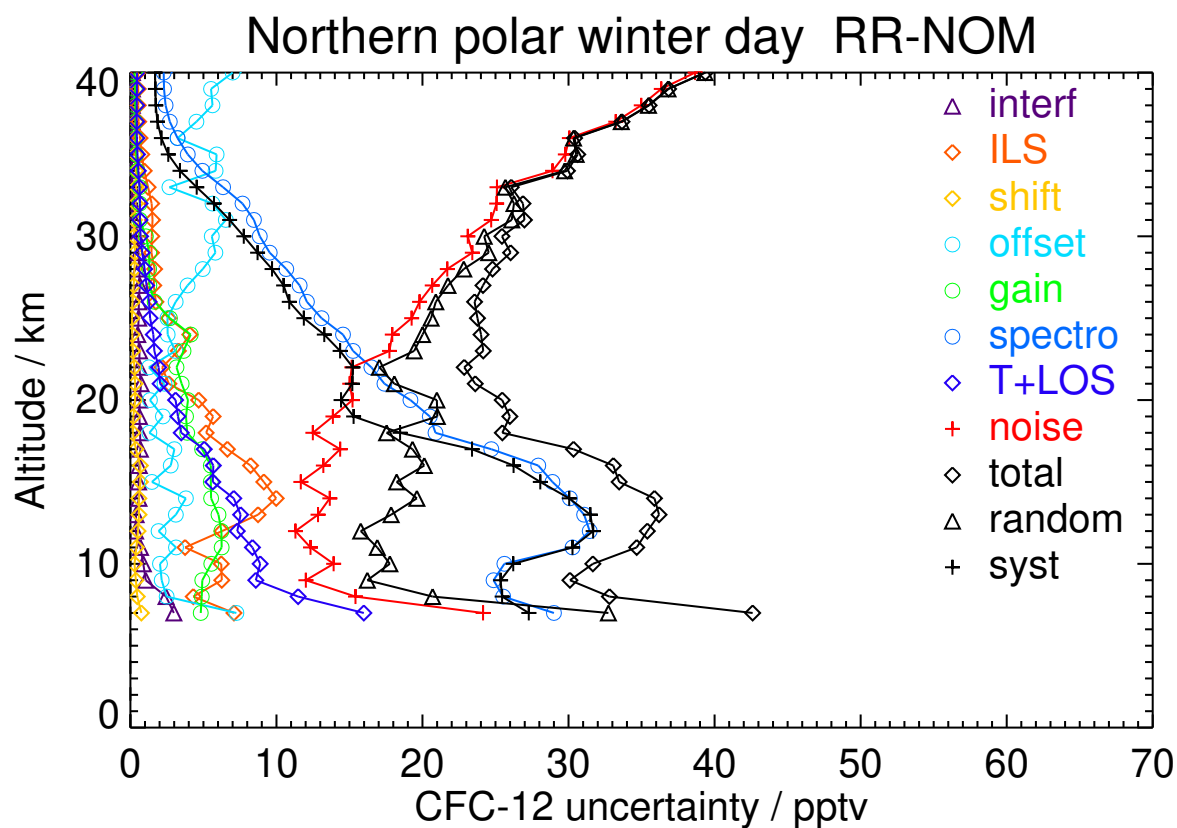

**Figure S35.** V8R\_F-12\_261 Northern polar winter day

**Table S37.** CFC-12 error budget for Northern polar winter night. All uncertainties are  $1\sigma$ .

| altitude<br>(km) | mean target<br>(pptv) | interf<br>(pptv) | ILS<br>(pptv) | shift<br>(pptv) | offset<br>(pptv) | gain<br>(pptv) | spectro<br>(pptv) | T+LOS<br>(pptv) | noise<br>(pptv) | random<br>(pptv) | syst<br>(pptv) | total<br>(pptv) |
|------------------|-----------------------|------------------|---------------|-----------------|------------------|----------------|-------------------|-----------------|-----------------|------------------|----------------|-----------------|
| 8                | 538.20                | 1.77             | 4.02          | 0.43            | 2.56             | 5.86           | 24.94             | 10.49           | 14.35           | 19.17            | 25.12          | 31.60           |
| 11               | 519.86                | 0.56             | 4.20          | 0.30            | 2.51             | 6.44           | 26.74             | 8.78            | 12.88           | 17.85            | 26.55          | 31.99           |
| 14               | 438.64                | 0.40             | 8.94          | 0.43            | 3.53             | 5.51           | 30.76             | 7.77            | 14.37           | 18.95            | 31.25          | 36.55           |
| 17               | 301.79                | 0.55             | 8.21          | 0.31            | 2.57             | 3.70           | 25.98             | 5.78            | 14.82           | 17.90            | 26.38          | 31.88           |
| 20               | 180.81                | 0.53             | 6.04          | 0.24            | 1.54             | 3.28           | 17.29             | 2.90            | 15.36           | 17.88            | 16.54          | 24.36           |
| 23               | 119.44                | 0.66             | 2.02          | 0.26            | 3.36             | 2.12           | 11.82             | 1.25            | 19.67           | 21.70            | 8.80           | 23.42           |
| 26               | 84.76                 | 0.77             | 1.54          | 0.12            | 2.40             | 1.41           | 7.95              | 0.91            | 18.93           | 20.04            | 5.62           | 20.81           |
| 29               | 73.15                 | 0.86             | 1.52          | 0.40            | 5.32             | 0.63           | 6.43              | 0.67            | 22.72           | 23.80            | 4.86           | 24.29           |
| 32               | 44.24                 | 0.63             | 1.31          | 0.51            | 6.63             | 0.45           | 4.78              | 0.56            | 24.37           | 25.49            | 3.79           | 25.77           |
| 35               | -5.30                 | 0.15             | 0.52          | 0.46            | 4.88             | 0.80           | 2.69              | 0.37            | 24.32           | 24.88            | 2.15           | 24.97           |
| 38               | -0.44                 | 0.19             | 0.29          | 0.41            | 5.24             | 0.77           | 1.32              | 0.38            | 28.10           | 28.61            | 1.16           | 28.63           |
| 41               | -5.56                 | 0.19             | 0.22          | 0.40            | 5.51             | 0.63           | 1.55              | 0.34            | 32.48           | 32.97            | 1.16           | 32.99           |

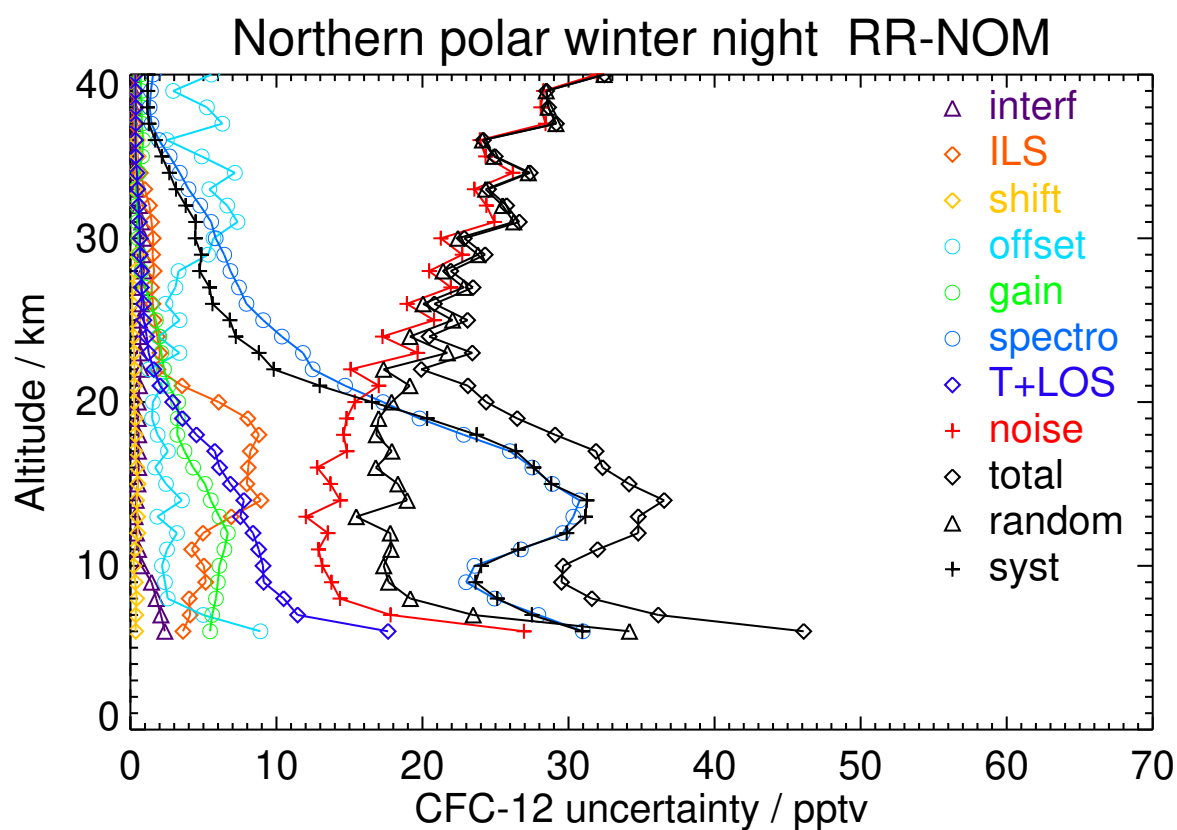

**Figure S36.** V8R\_F-12\_261 Northern polar winter night

**Table S38.** CFC-12 error budget for Northern polar spring day. All uncertainties are  $1\sigma$ .

| altitude<br>(km) | mean target<br>(pptv) | interf<br>(pptv) | ILS<br>(pptv) | shift<br>(pptv) | offset<br>(pptv) | gain<br>(pptv) | spectro<br>(pptv) | T+LOS<br>(pptv) | noise<br>(pptv) | random<br>(pptv) | syst<br>(pptv) | total<br>(pptv) |
|------------------|-----------------------|------------------|---------------|-----------------|------------------|----------------|-------------------|-----------------|-----------------|------------------|----------------|-----------------|
| 8                | 522.11                | 2.38             | 3.74          | 0.44            | 4.77             | 4.61           | 25.79             | 13.61           | 18.72           | 25.56            | 24.72          | 35.56           |
| 11               | 478.60                | 0.55             | 1.94          | 0.27            | 2.06             | 5.58           | 25.15             | 7.24            | 11.46           | 14.32            | 25.51          | 29.26           |
| 14               | 426.13                | 0.41             | 6.72          | 0.48            | 1.97             | 6.53           | 29.91             | 6.56            | 11.99           | 14.88            | 30.86          | 34.26           |
| 17               | 315.80                | 0.45             | 5.58          | 0.32            | 1.57             | 4.90           | 23.74             | 4.67            | 13.26           | 15.06            | 24.34          | 28.62           |
| 20               | 226.19                | 0.48             | 3.06          | 0.27            | 1.77             | 3.22           | 18.45             | 2.71            | 15.13           | 15.96            | 18.58          | 24.49           |
| 23               | 173.93                | 0.46             | 1.52          | 0.16            | 2.62             | 1.71           | 12.90             | 1.56            | 19.69           | 20.16            | 12.76          | 23.86           |
| 26               | 126.89                | 0.41             | 2.15          | 0.09            | 2.81             | 1.36           | 11.47             | 1.23            | 22.39           | 22.71            | 11.54          | 25.47           |
| 29               | 66.98                 | 0.38             | 2.16          | 0.31            | 6.70             | 0.82           | 8.15              | 0.87            | 26.19           | 27.16            | 8.11           | 28.34           |
| 32               | 27.84                 | 0.27             | 1.05          | 0.21            | 7.55             | 0.34           | 4.04              | 0.46            | 30.15           | 31.15            | 3.69           | 31.37           |
| 35               | 6.60                  | 0.15             | 0.51          | 0.36            | 4.87             | 0.26           | 2.10              | 0.34            | 32.38           | 32.80            | 1.28           | 32.83           |
| 38               | 1.27                  | 0.19             | 0.22          | 0.41            | 4.51             | 0.45           | 1.47              | 0.43            | 34.88           | 35.20            | 0.98           | 35.21           |
| 41               | -6.24                 | 0.20             | 0.20          | 0.43            | 4.92             | 0.59           | 1.45              | 0.41            | 37.58           | 37.92            | 1.12           | 37.94           |

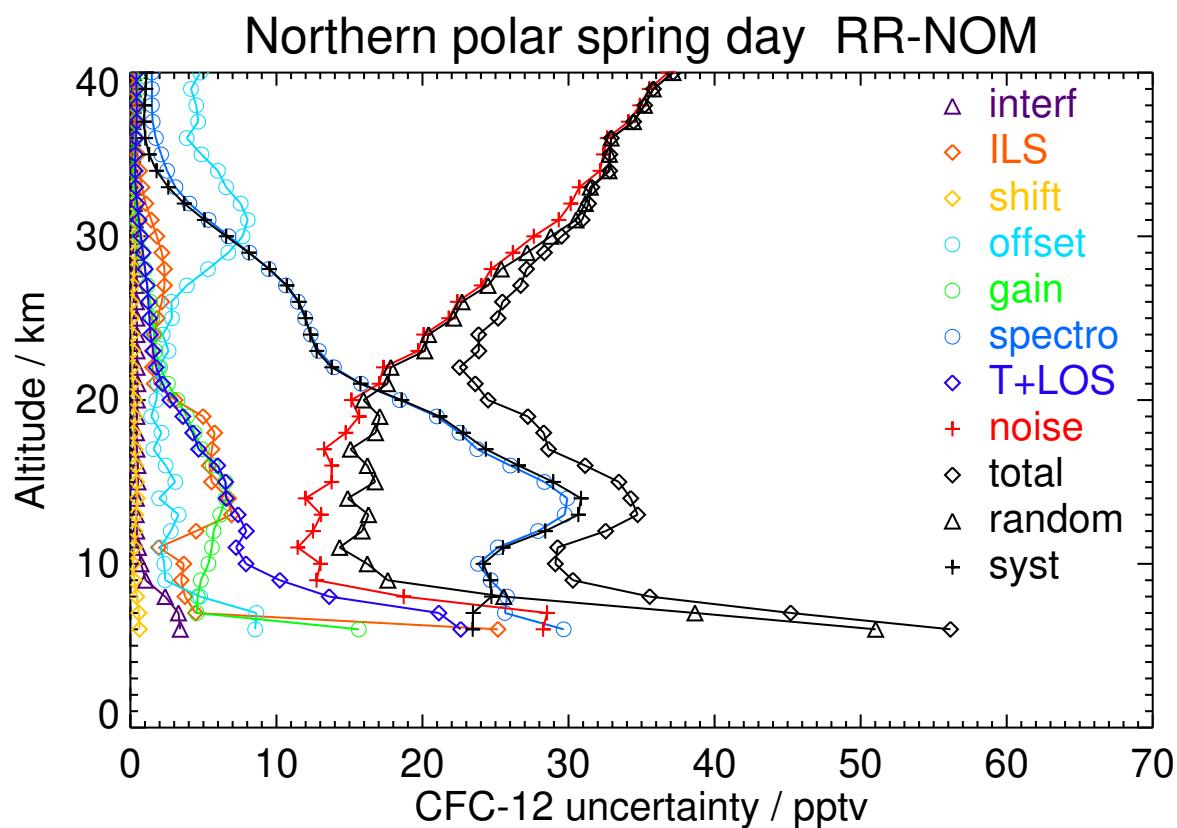

**Figure S37.** V8R\_F-12\_261 Northern polar spring day

**Table S39.** CFC-12 error budget for Northern polar spring night. All uncertainties are  $1\sigma$ .

| altitude<br>(km) | mean target<br>(pptv) | interf<br>(pptv) | ILS<br>(pptv) | shift<br>(pptv) | offset<br>(pptv) | gain<br>(pptv) | spectro<br>(pptv) | T+LOS<br>(pptv) | noise<br>(pptv) | random<br>(pptv) | syst<br>(pptv) | total<br>(pptv) |
|------------------|-----------------------|------------------|---------------|-----------------|------------------|----------------|-------------------|-----------------|-----------------|------------------|----------------|-----------------|
| 8                | 527.34                | 2.63             | 3.69          | 0.56            | 7.34             | 4.22           | 27.09             | 17.17           | 24.55           | 32.42            | 25.93          | 41.52           |
| 11               | 492.84                | 0.71             | 2.59          | 0.30            | 2.38             | 6.22           | 25.54             | 7.72            | 13.27           | 16.64            | 25.75          | 30.66           |
| 14               | 443.33                | 0.35             | 6.27          | 0.51            | 2.85             | 5.73           | 28.09             | 6.96            | 13.11           | 16.59            | 28.55          | 33.02           |
| 17               | 358.49                | 0.46             | 7.42          | 0.50            | 2.43             | 5.96           | 29.50             | 5.79            | 14.30           | 16.99            | 30.27          | 34.71           |
| 20               | 243.06                | 0.47             | 3.99          | 0.34            | 1.53             | 3.57           | 20.36             | 3.38            | 15.79           | 16.83            | 20.58          | 26.58           |
| 23               | 175.36                | 0.46             | 2.17          | 0.11            | 2.90             | 2.12           | 14.59             | 1.71            | 20.30           | 20.83            | 14.56          | 25.42           |
| 26               | 111.02                | 0.42             | 2.20          | 0.10            | 3.15             | 1.18           | 10.53             | 1.15            | 22.03           | 22.42            | 10.54          | 24.78           |
| 29               | 77.69                 | 0.37             | 1.95          | 0.32            | 6.77             | 0.76           | 7.42              | 0.76            | 26.37           | 27.36            | 7.26           | 28.31           |
| 32               | 31.87                 | 0.19             | 1.36          | 0.25            | 6.96             | 0.32           | 4.81              | 0.61            | 29.45           | 30.34            | 4.58           | 30.68           |
| 35               | -7.80                 | 0.11             | 0.58          | 0.37            | 5.30             | 0.25           | 2.16              | 0.41            | 32.32           | 32.79            | 1.66           | 32.84           |
| 38               | -6.51                 | 0.16             | 0.23          | 0.44            | 4.73             | 0.44           | 1.37              | 0.40            | 34.69           | 35.03            | 0.97           | 35.04           |
| 41               | -8.32                 | 0.18             | 0.20          | 0.47            | 5.03             | 0.58           | 1.39              | 0.41            | 37.53           | 37.89            | 1.02           | 37.90           |

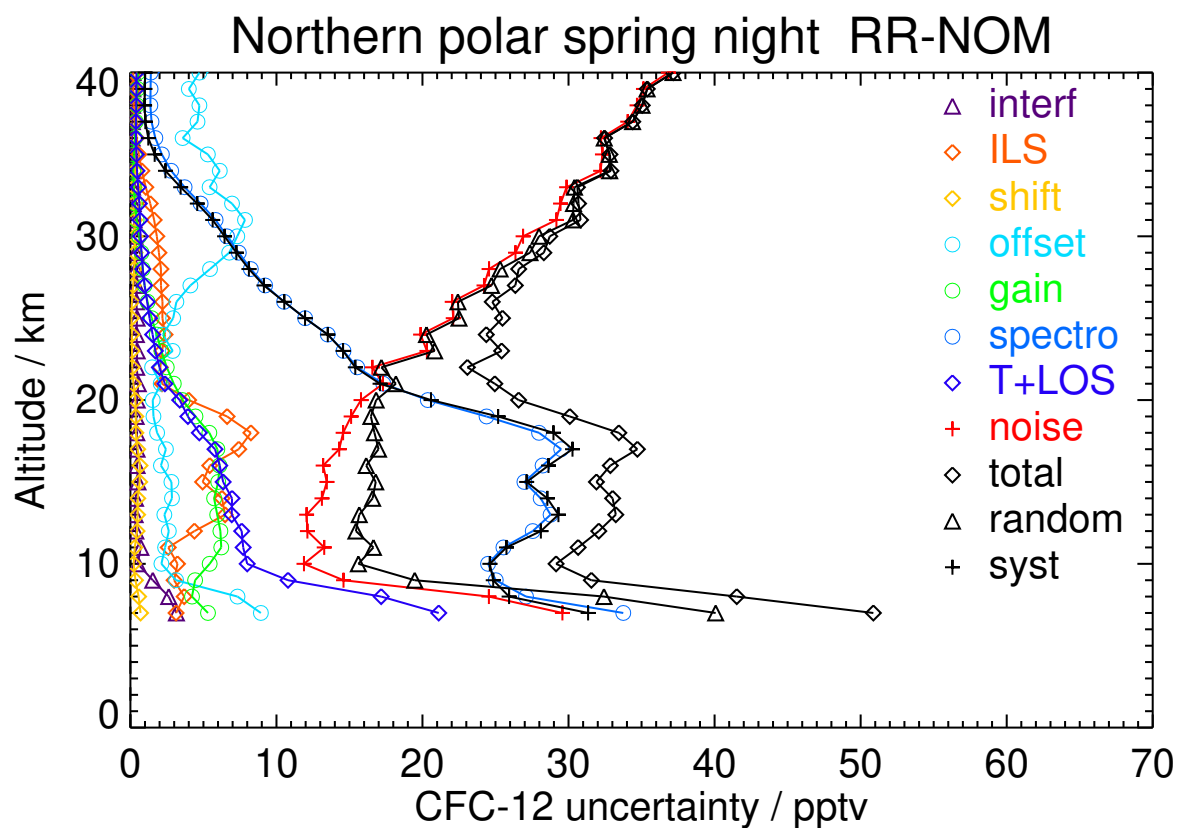

**Figure S38.** V8R\_F-12\_261 Northern polar spring night

**Table S40.** CFC-12 error budget for Northern polar summer day. All uncertainties are  $1\sigma$ .

| altitude<br>(km) | mean target<br>(pptv) | interf<br>(pptv) | ILS<br>(pptv) | shift<br>(pptv) | offset<br>(pptv) | gain<br>(pptv) | spectro<br>(pptv) | T+LOS<br>(pptv) | noise<br>(pptv) | random<br>(pptv) | syst<br>(pptv) | total<br>(pptv) |
|------------------|-----------------------|------------------|---------------|-----------------|------------------|----------------|-------------------|-----------------|-----------------|------------------|----------------|-----------------|
| 11               | 513.54                | 0.88             | 4.15          | 0.41            | 2.32             | 5.25           | 24.44             | 7.91            | 11.34           | 15.08            | 24.75          | 28.98           |
| 14               | 487.16                | 0.41             | 5.90          | 0.20            | 1.78             | 4.57           | 25.27             | 6.92            | 11.74           | 14.60            | 25.88          | 29.71           |
| 17               | 444.09                | 0.63             | 5.44          | 0.30            | 2.09             | 5.82           | 30.50             | 5.65            | 12.58           | 14.79            | 31.15          | 34.48           |
| 20               | 324.70                | 0.56             | 4.22          | 0.13            | 1.92             | 4.81           | 25.05             | 3.74            | 12.64           | 13.98            | 25.51          | 29.09           |
| 23               | 205.37                | 0.73             | 1.71          | 0.12            | 3.67             | 2.79           | 16.82             | 2.23            | 19.23           | 19.94            | 16.88          | 26.12           |
| 26               | 156.44                | 0.58             | 2.90          | 0.32            | 1.53             | 1.33           | 10.96             | 1.24            | 17.19           | 17.58            | 10.99          | 20.73           |
| 29               | 93.18                 | 0.75             | 3.05          | 0.29            | 4.88             | 0.52           | 9.17              | 1.06            | 22.19           | 22.85            | 9.48           | 24.73           |
| 32               | 44.68                 | 0.60             | 1.34          | 0.46            | 5.88             | 0.22           | 4.27              | 0.53            | 23.82           | 24.61            | 4.21           | 24.96           |
| 35               | 11.91                 | 0.13             | 0.49          | 0.46            | 3.60             | 0.69           | 2.55              | 0.35            | 22.75           | 23.10            | 2.16           | 23.20           |
| 38               | -7.50                 | 0.17             | 0.10          | 0.35            | 4.15             | 0.72           | 1.46              | 0.42            | 26.23           | 26.58            | 1.31           | 26.61           |
| 41               | -3.95                 | 0.22             | 0.22          | 0.51            | 3.77             | 0.93           | 1.55              | 0.39            | 29.26           | 29.52            | 1.61           | 29.56           |

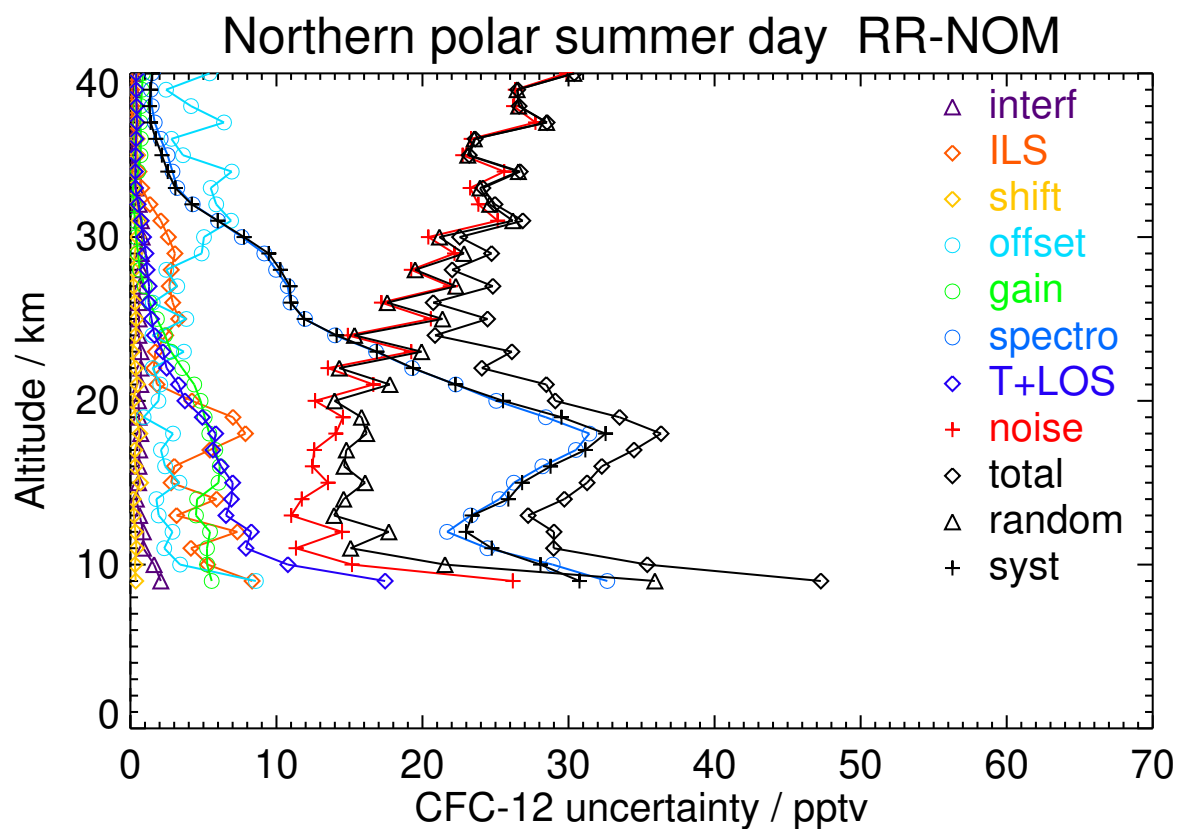

**Figure S39.** V8R\_F-12\_261 Northern polar summer day

**Table S41.** CFC-12 error budget for Northern polar summer night. All uncertainties are  $1\sigma$ .

| altitude<br>(km) | mean target<br>(pptv) | interf<br>(pptv) | ILS<br>(pptv) | shift<br>(pptv) | offset<br>(pptv) | gain<br>(pptv) | spectro<br>(pptv) | T+LOS<br>(pptv) | noise<br>(pptv) | random<br>(pptv) | syst<br>(pptv) | total<br>(pptv) |
|------------------|-----------------------|------------------|---------------|-----------------|------------------|----------------|-------------------|-----------------|-----------------|------------------|----------------|-----------------|
| 14               | 492.16                | 0.40             | 2.54          | 0.08            | 3.30             | 4.57           | 25.51             | 8.12            | 12.35           | 15.66            | 25.74          | 30.12           |
| 17               | 441.67                | 0.53             | 3.85          | 0.26            | 1.14             | 5.87           | 30.25             | 6.48            | 13.45           | 15.39            | 30.85          | 34.48           |
| 20               | 319.43                | 0.59             | 5.31          | 0.16            | 1.78             | 4.89           | 25.49             | 4.61            | 14.95           | 16.13            | 26.26          | 30.82           |
| 23               | 198.56                | 0.60             | 1.90          | 0.11            | 3.39             | 2.92           | 16.66             | 2.25            | 18.72           | 19.40            | 16.76          | 25.63           |
| 26               | 135.89                | 0.61             | 2.10          | 0.19            | 2.52             | 1.34           | 10.73             | 1.38            | 18.95           | 19.24            | 10.90          | 22.12           |
| 29               | 75.65                 | 0.67             | 2.31          | 0.37            | 4.93             | 0.62           | 8.21              | 0.95            | 22.64           | 23.29            | 8.32           | 24.73           |
| 32               | 19.62                 | 0.42             | 0.88          | 0.36            | 6.39             | 0.30           | 3.64              | 0.49            | 24.97           | 25.85            | 3.28           | 26.06           |
| 35               | 10.56                 | 0.13             | 0.40          | 0.36            | 5.06             | 0.61           | 1.87              | 0.44            | 25.86           | 26.40            | 1.28           | 26.43           |
| 38               | 4.92                  | 0.15             | 0.20          | 0.44            | 5.02             | 0.68           | 1.73              | 0.47            | 28.84           | 29.30            | 1.55           | 29.34           |
| 41               | -5.52                 | 0.18             | 0.31          | 0.46            | 4.47             | 0.74           | 1.82              | 0.38            | 32.17           | 32.49            | 1.78           | 32.54           |

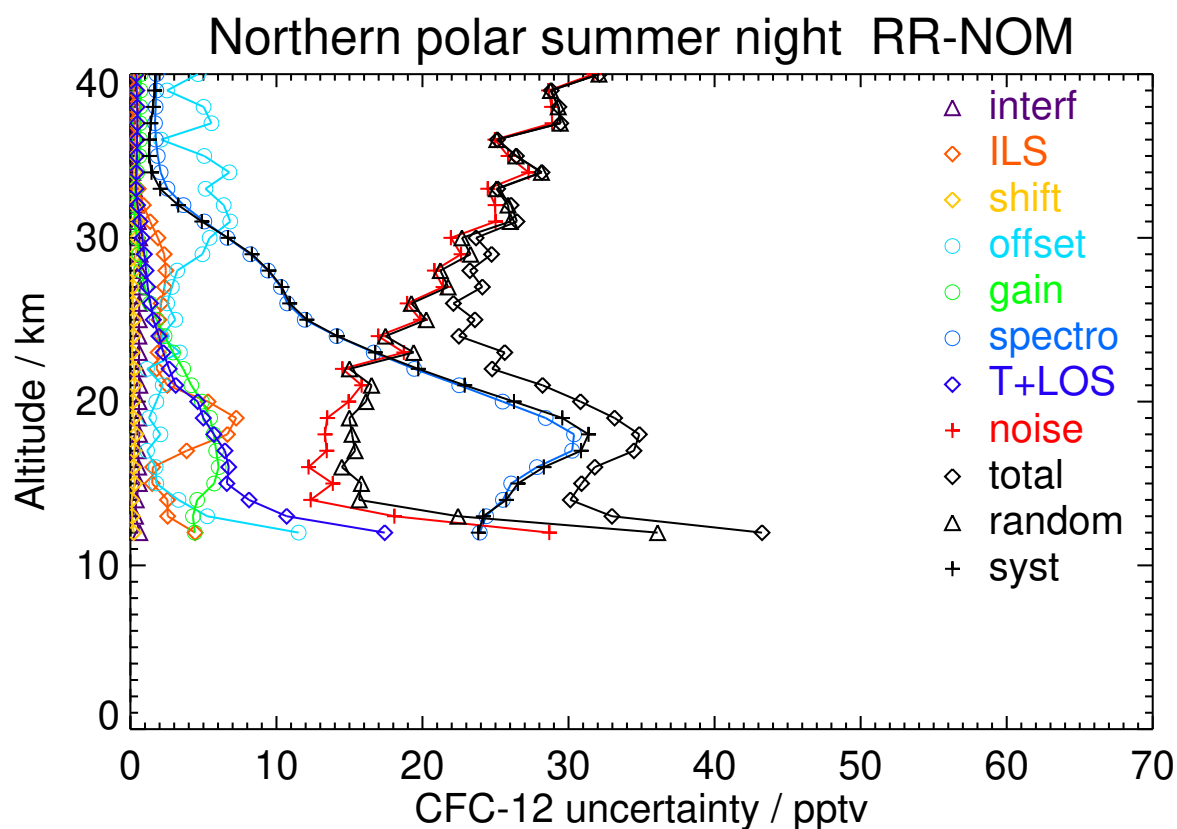

**Figure S40.** V8R\_F-12\_261 Northern polar summer night

**Table S42.** CFC-12 error budget for Northern polar autumn day. All uncertainties are  $1\sigma$ .

| altitude<br>(km) | mean target<br>(pptv) | interf<br>(pptv) | ILS<br>(pptv) | shift<br>(pptv) | offset<br>(pptv) | gain<br>(pptv) | spectro<br>(pptv) | T+LOS<br>(pptv) | noise<br>(pptv) | random<br>(pptv) | syst<br>(pptv) | total<br>(pptv) |
|------------------|-----------------------|------------------|---------------|-----------------|------------------|----------------|-------------------|-----------------|-----------------|------------------|----------------|-----------------|
| 8                | 543.86                | 1.35             | 7.25          | 0.51            | 9.03             | 3.56           | 28.78             | 14.32           | 26.23           | 31.26            | 29.89          | 43.25           |
| 11               | 514.44                | 0.78             | 4.11          | 0.32            | 9.32             | 4.75           | 26.75             | 15.58           | 26.61           | 33.83            | 25.48          | 42.35           |
| 14               | 496.48                | 0.48             | 5.86          | 0.48            | 2.65             | 6.08           | 30.46             | 8.10            | 15.21           | 18.14            | 31.22          | 36.11           |
| 17               | 378.21                | 0.48             | 7.11          | 0.42            | 2.69             | 5.71           | 30.64             | 6.87            | 14.89           | 17.65            | 31.42          | 36.04           |
| 20               | 257.06                | 0.49             | 5.69          | 0.36            | 1.56             | 3.76           | 22.82             | 3.95            | 16.49           | 18.32            | 22.84          | 29.28           |
| 23               | 154.30                | 0.46             | 2.05          | 0.09            | 2.77             | 2.15           | 15.13             | 1.93            | 19.61           | 20.32            | 14.87          | 25.18           |
| 26               | 86.25                 | 0.48             | 1.81          | 0.08            | 3.11             | 1.12           | 9.46              | 1.09            | 22.10           | 22.55            | 9.23           | 24.36           |
| 29               | 31.95                 | 0.45             | 1.21          | 0.24            | 6.28             | 0.57           | 5.81              | 0.63            | 25.72           | 26.72            | 4.85           | 27.15           |
| 32               | -0.08                 | 0.26             | 0.66          | 0.22            | 7.03             | 0.17           | 2.41              | 0.36            | 29.41           | 30.30            | 1.61           | 30.35           |
| 35               | -3.94                 | 0.09             | 0.29          | 0.31            | 5.71             | 0.32           | 1.64              | 0.43            | 32.81           | 33.35            | 0.74           | 33.36           |
| 38               | 9.01                  | 0.09             | 0.31          | 0.41            | 5.05             | 0.42           | 1.59              | 0.42            | 36.15           | 36.53            | 1.02           | 36.54           |
| 41               | 4.34                  | 0.10             | 0.35          | 0.45            | 6.73             | 0.44           | 1.55              | 0.37            | 39.76           | 40.34            | 1.35           | 40.36           |

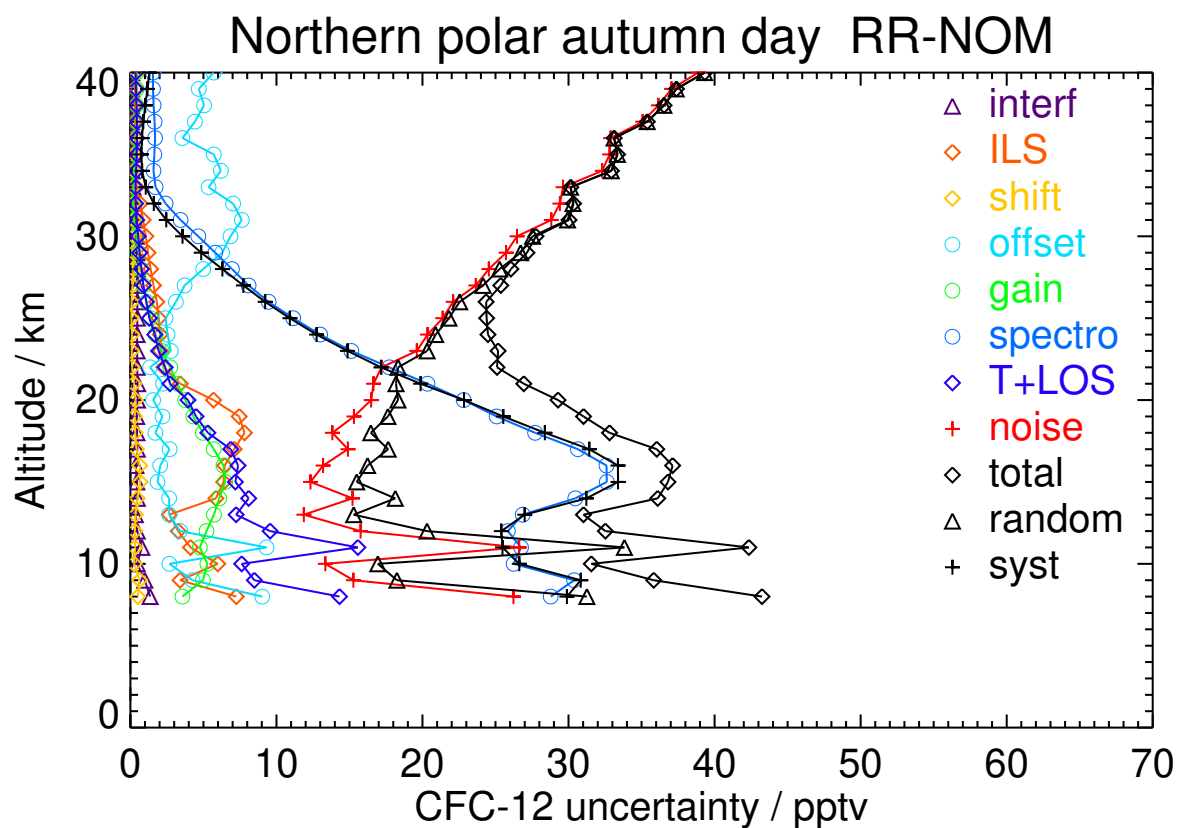

**Figure S41.** V8R\_F-12\_261 Northern polar autumn day

**Table S43.** CFC-12 error budget for Northern polar autumn night. All uncertainties are  $1\sigma$ .

| altitude<br>(km) | mean target<br>(pptv) | interf<br>(pptv) | ILS<br>(pptv) | shift<br>(pptv) | offset<br>(pptv) | gain<br>(pptv) | spectro<br>(pptv) | T+LOS<br>(pptv) | noise<br>(pptv) | random<br>(pptv) | syst<br>(pptv) | total<br>(pptv) |
|------------------|-----------------------|------------------|---------------|-----------------|------------------|----------------|-------------------|-----------------|-----------------|------------------|----------------|-----------------|
| 11               | 514.80                | 0.75             | 3.11          | 0.49            | 9.68             | 4.88           | 28.23             | 15.41           | 26.18           | 32.93            | 27.63          | 42.99           |
| 14               | 477.53                | 0.56             | 6.70          | 0.54            | 2.62             | 6.05           | 31.08             | 7.99            | 14.98           | 17.84            | 32.01          | 36.65           |
| 17               | 368.58                | 0.51             | 6.87          | 0.46            | 2.48             | 6.36           | 30.16             | 6.48            | 14.60           | 16.84            | 31.23          | 35.48           |
| 20               | 249.65                | 0.49             | 5.32          | 0.34            | 1.55             | 4.07           | 20.99             | 3.63            | 16.31           | 18.01            | 21.05          | 27.70           |
| 23               | 162.97                | 0.47             | 2.27          | 0.07            | 2.82             | 2.39           | 16.50             | 1.91            | 20.00           | 21.00            | 15.95          | 26.36           |
| 26               | 78.53                 | 0.45             | 2.08          | 0.10            | 3.13             | 1.12           | 9.86              | 1.19            | 22.20           | 22.66            | 9.67           | 24.64           |
| 29               | 25.50                 | 0.44             | 1.04          | 0.22            | 6.39             | 0.43           | 4.39              | 0.61            | 25.93           | 26.82            | 3.91           | 27.10           |
| 32               | 10.03                 | 0.26             | 0.49          | 0.20            | 6.97             | 0.25           | 2.63              | 0.40            | 29.29           | 30.20            | 1.51           | 30.23           |
| 35               | 14.64                 | 0.08             | 0.49          | 0.31            | 5.54             | 0.41           | 2.46              | 0.40            | 32.66           | 33.19            | 1.53           | 33.23           |
| 38               | 8.23                  | 0.08             | 0.45          | 0.39            | 5.33             | 0.42           | 2.33              | 0.42            | 36.32           | 36.75            | 1.77           | 36.80           |
| 41               | -9.26                 | 0.10             | 0.42          | 0.44            | 6.78             | 0.42           | 2.04              | 0.36            | 40.06           | 40.66            | 1.49           | 40.69           |

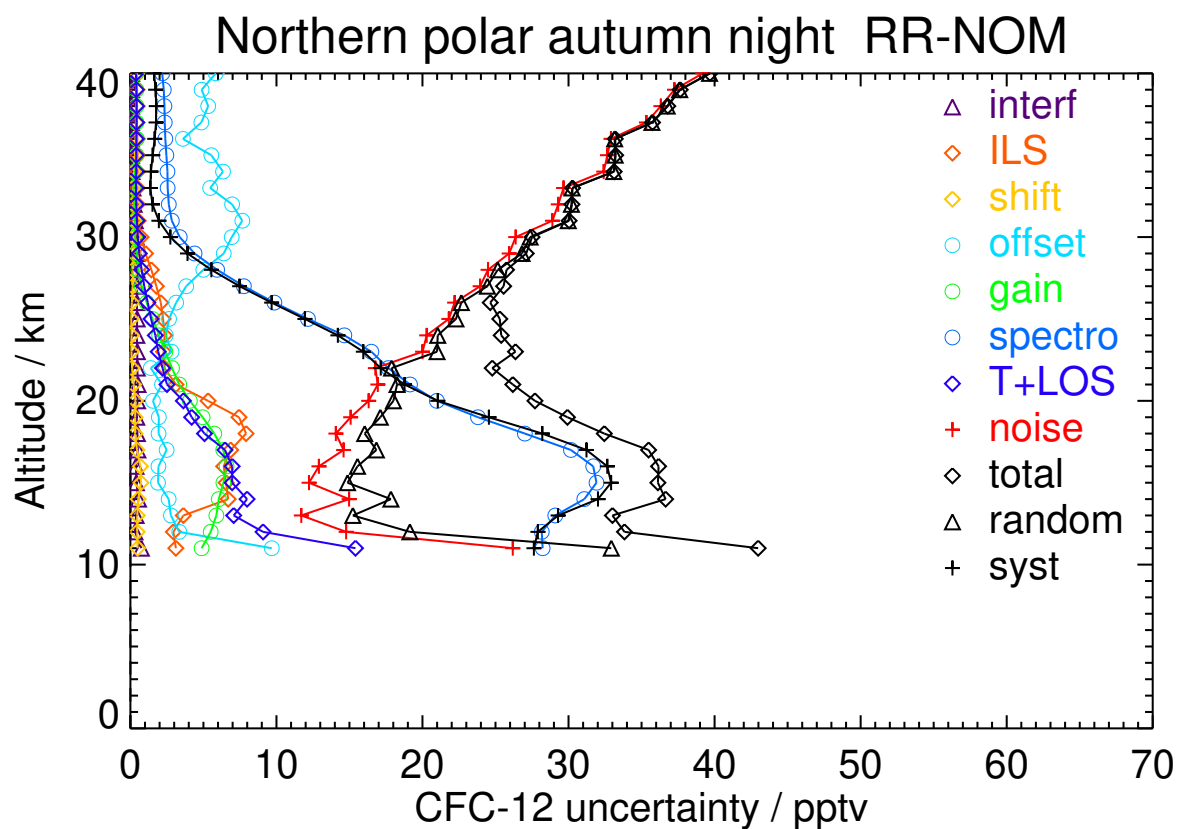

**Figure S42.** V8R\_F-12\_261 Northern polar autumn night

**Table S44.** CFC-12 error budget for Northern midlatitude winter day. All uncertainties are  $1\sigma$ .

| altitude<br>(km) | mean target<br>(pptv) | interf<br>(pptv) | ILS<br>(pptv) | shift<br>(pptv) | offset<br>(pptv) | gain<br>(pptv) | spectro<br>(pptv) | T+LOS<br>(pptv) | noise<br>(pptv) | random<br>(pptv) | syst<br>(pptv) | total<br>(pptv) |
|------------------|-----------------------|------------------|---------------|-----------------|------------------|----------------|-------------------|-----------------|-----------------|------------------|----------------|-----------------|
| 8                | 536.13                | 1.80             | 5.09          | 0.41            | 2.65             | 5.39           | 26.25             | 10.01           | 14.52           | 20.05            | 25.76          | 32.64           |
| 11               | 519.53                | 0.66             | 5.67          | 0.22            | 3.27             | 5.63           | 23.98             | 8.25            | 12.64           | 17.72            | 23.74          | 29.63           |
| 14               | 470.79                | 0.45             | 5.79          | 0.50            | 3.28             | 6.14           | 28.16             | 7.17            | 13.40           | 16.97            | 28.61          | 33.27           |
| 17               | 427.60                | 0.54             | 4.92          | 0.27            | 2.23             | 5.62           | 29.76             | 6.03            | 14.48           | 17.53            | 29.76          | 34.54           |
| 20               | 304.16                | 0.53             | 5.59          | 0.39            | 1.95             | 4.12           | 22.19             | 3.85            | 15.72           | 17.30            | 22.53          | 28.40           |
| 23               | 262.24                | 0.53             | 3.36          | 0.20            | 1.74             | 2.69           | 19.74             | 2.46            | 17.91           | 19.21            | 19.21          | 27.17           |
| 26               | 161.21                | 0.59             | 3.38          | 0.10            | 2.09             | 1.99           | 14.29             | 1.65            | 19.71           | 20.59            | 13.83          | 24.81           |
| 29               | 118.97                | 0.76             | 2.45          | 0.50            | 5.60             | 0.91           | 9.09              | 1.05            | 23.25           | 24.27            | 8.61           | 25.75           |
| 32               | 67.48                 | 0.34             | 1.59          | 0.36            | 6.29             | 0.37           | 6.76              | 0.57            | 24.29           | 25.25            | 6.42           | 26.05           |
| 35               | 19.48                 | 0.14             | 0.64          | 0.39            | 5.01             | 0.65           | 3.77              | 0.46            | 27.25           | 27.81            | 3.14           | 27.98           |
| 38               | -2.07                 | 0.15             | 0.25          | 0.41            | 4.38             | 0.64           | 2.23              | 0.44            | 30.72           | 31.07            | 1.69           | 31.12           |
| 41               | -1.20                 | 0.17             | 0.19          | 0.48            | 4.74             | 0.64           | 1.55              | 0.40            | 34.63           | 34.97            | 1.34           | 35.00           |

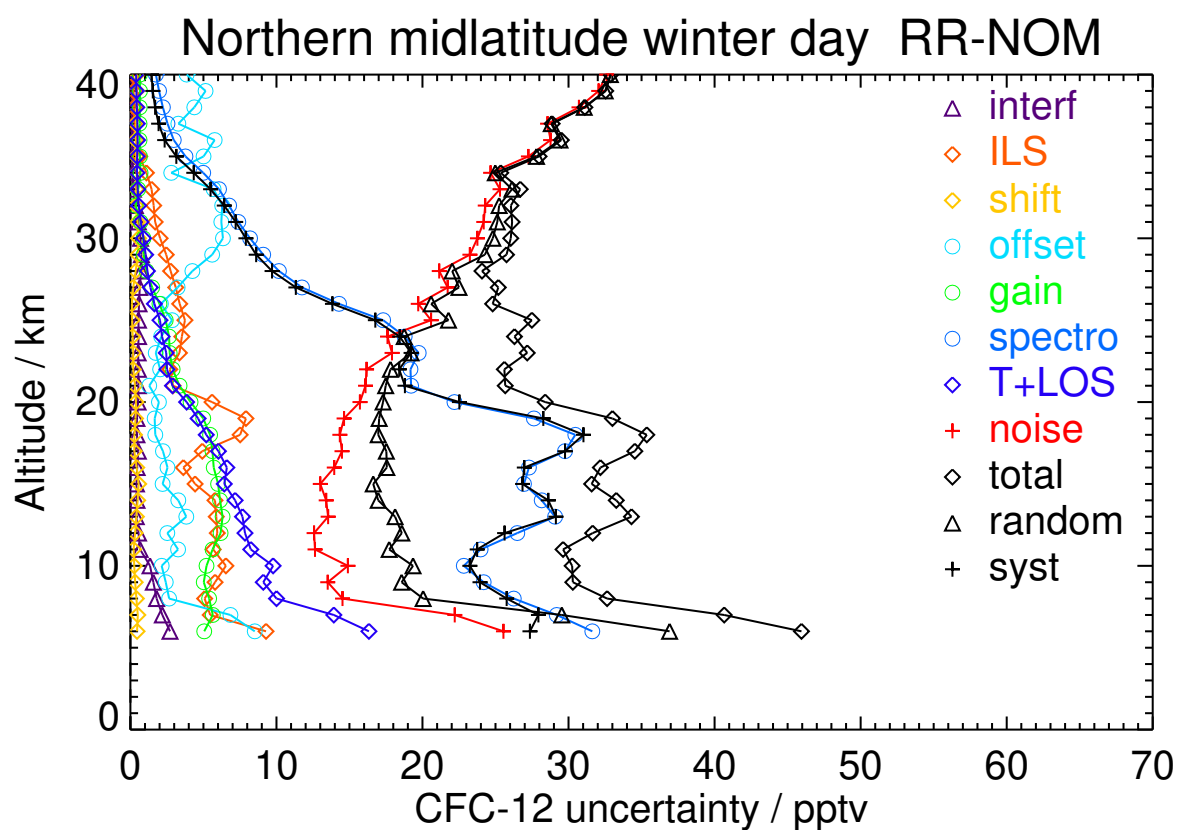

**Figure S43.** V8R\_F-12\_261 Northern midlatitude winter day

**Table S45.** CFC-12 error budget for Northern midlatitude winter night. All uncertainties are  $1\sigma$ .

| altitude<br>(km) | mean target<br>(pptv) | interf<br>(pptv) | ILS<br>(pptv) | shift<br>(pptv) | offset<br>(pptv) | gain<br>(pptv) | spectro<br>(pptv) | T+LOS<br>(pptv) | noise<br>(pptv) | random<br>(pptv) | syst<br>(pptv) | total<br>(pptv) |
|------------------|-----------------------|------------------|---------------|-----------------|------------------|----------------|-------------------|-----------------|-----------------|------------------|----------------|-----------------|
| 8                | 542.06                | 1.87             | 4.70          | 0.51            | 2.57             | 5.65           | 28.79             | 9.70            | 13.96           | 18.48            | 28.99          | 34.38           |
| 11               | 520.58                | 0.86             | 3.69          | 0.31            | 2.37             | 5.97           | 26.15             | 8.12            | 12.34           | 16.21            | 26.36          | 30.94           |
| 14               | 486.71                | 0.37             | 5.60          | 0.50            | 3.34             | 6.11           | 28.03             | 7.23            | 13.68           | 17.70            | 28.14          | 33.24           |
| 17               | 427.39                | 0.49             | 4.92          | 0.34            | 2.34             | 6.02           | 30.32             | 6.36            | 14.61           | 17.79            | 30.39          | 35.21           |
| 20               | 316.65                | 0.47             | 6.09          | 0.39            | 1.99             | 4.10           | 23.70             | 3.97            | 15.93           | 18.71            | 23.22          | 29.83           |
| 23               | 261.49                | 0.55             | 2.59          | 0.22            | 1.81             | 2.42           | 18.75             | 2.37            | 17.96           | 19.07            | 18.23          | 26.38           |
| 26               | 182.21                | 0.53             | 3.95          | 0.10            | 2.23             | 1.63           | 15.96             | 1.79            | 20.02           | 20.80            | 15.79          | 26.12           |
| 29               | 104.36                | 0.77             | 3.13          | 0.53            | 5.84             | 0.90           | 9.56              | 1.15            | 23.54           | 24.62            | 9.30           | 26.32           |
| 32               | 70.19                 | 0.38             | 1.46          | 0.33            | 6.29             | 0.32           | 6.00              | 0.59            | 24.08           | 25.08            | 5.39           | 25.65           |
| 35               | 17.69                 | 0.15             | 0.60          | 0.39            | 4.70             | 0.70           | 3.98              | 0.42            | 26.76           | 27.27            | 3.41           | 27.48           |
| 38               | -12.33                | 0.20             | 0.28          | 0.41            | 4.26             | 0.65           | 2.21              | 0.37            | 29.70           | 30.05            | 1.68           | 30.10           |
| 41               | -13.23                | 0.21             | 0.19          | 0.45            | 4.25             | 0.75           | 1.38              | 0.35            | 33.12           | 33.41            | 1.30           | 33.44           |

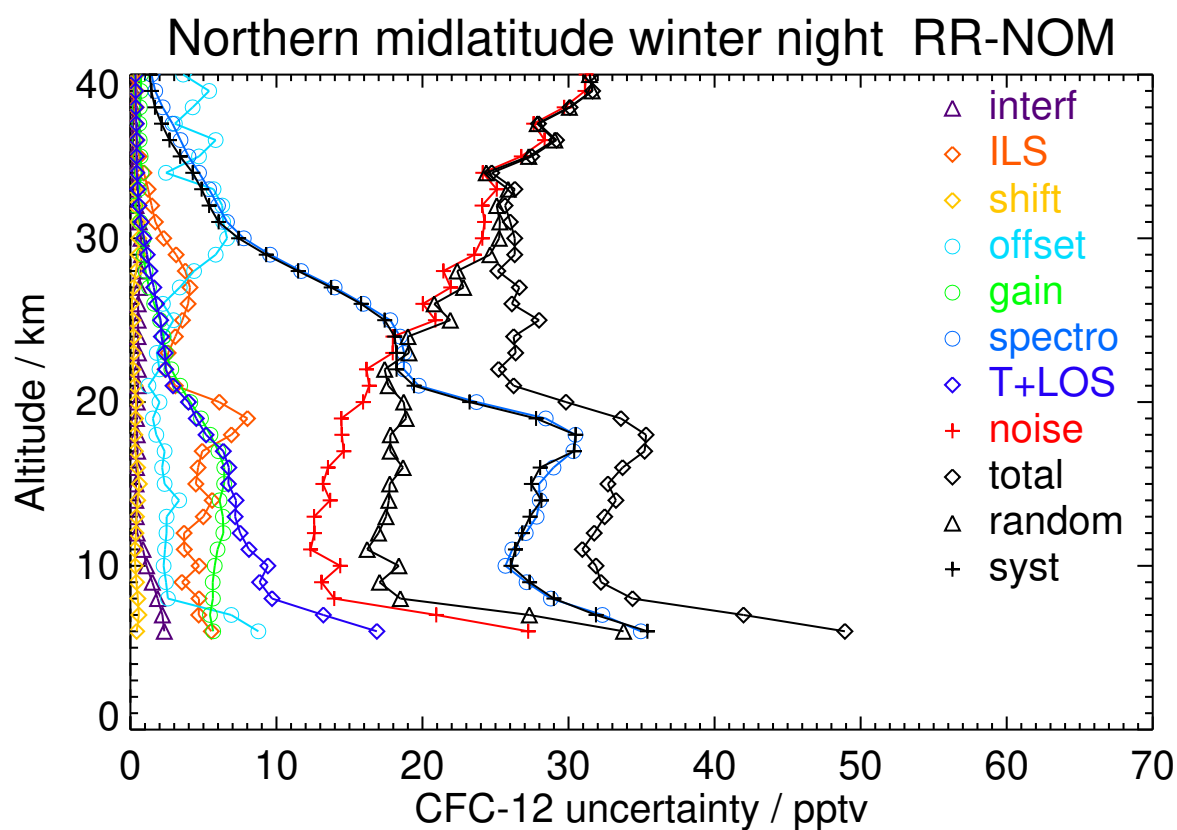

**Figure S44.** V8R\_F-12\_261 Northern midlatitude winter night

**Table S46.** CFC-12 error budget for Northern midlatitude spring day. All uncertainties are  $1\sigma$ .

| altitude<br>(km) | mean target<br>(pptv) | interf<br>(pptv) | ILS<br>(pptv) | shift<br>(pptv) | offset<br>(pptv) | gain<br>(pptv) | spectro<br>(pptv) | T+LOS<br>(pptv) | noise<br>(pptv) | random<br>(pptv) | syst<br>(pptv) | total<br>(pptv) |
|------------------|-----------------------|------------------|---------------|-----------------|------------------|----------------|-------------------|-----------------|-----------------|------------------|----------------|-----------------|
| 8                | 537.10                | 2.17             | 6.75          | 0.41            | 6.43             | 4.75           | 26.72             | 14.37           | 22.38           | 29.88            | 25.35          | 39.19           |
| 11               | 505.72                | 0.81             | 5.04          | 0.28            | 2.23             | 5.95           | 25.02             | 8.42            | 13.75           | 17.72            | 25.27          | 30.86           |
| 14               | 490.39                | 0.49             | 5.27          | 0.41            | 3.10             | 6.20           | 27.98             | 7.03            | 13.16           | 17.19            | 28.04          | 32.89           |
| 17               | 425.97                | 0.43             | 6.04          | 0.23            | 2.16             | 6.74           | 30.79             | 6.20            | 14.23           | 17.47            | 31.15          | 35.72           |
| 20               | 319.40                | 0.45             | 5.68          | 0.39            | 1.52             | 4.88           | 25.84             | 4.03            | 15.84           | 17.87            | 25.96          | 31.52           |
| 23               | 222.06                | 0.51             | 2.71          | 0.22            | 1.54             | 2.88           | 17.54             | 2.25            | 17.42           | 18.28            | 17.32          | 25.19           |
| 26               | 165.98                | 0.55             | 2.23          | 0.16            | 2.66             | 1.69           | 12.01             | 1.38            | 21.38           | 21.90            | 11.79          | 24.87           |
| 29               | 126.67                | 0.71             | 3.00          | 0.55            | 6.03             | 1.22           | 10.89             | 1.23            | 23.73           | 24.93            | 10.47          | 27.04           |
| 32               | 53.79                 | 0.27             | 2.10          | 0.42            | 6.11             | 0.42           | 7.73              | 0.62            | 25.89           | 27.03            | 6.48           | 27.80           |
| 35               | 13.10                 | 0.15             | 0.79          | 0.44            | 4.96             | 0.64           | 3.45              | 0.54            | 28.36           | 28.93            | 2.39           | 29.03           |
| 38               | -5.66                 | 0.18             | 0.22          | 0.44            | 4.56             | 0.74           | 1.94              | 0.42            | 31.01           | 31.38            | 1.60           | 31.42           |
| 41               | -6.93                 | 0.19             | 0.15          | 0.49            | 4.53             | 0.80           | 1.95              | 0.36            | 34.14           | 34.46            | 1.74           | 34.51           |

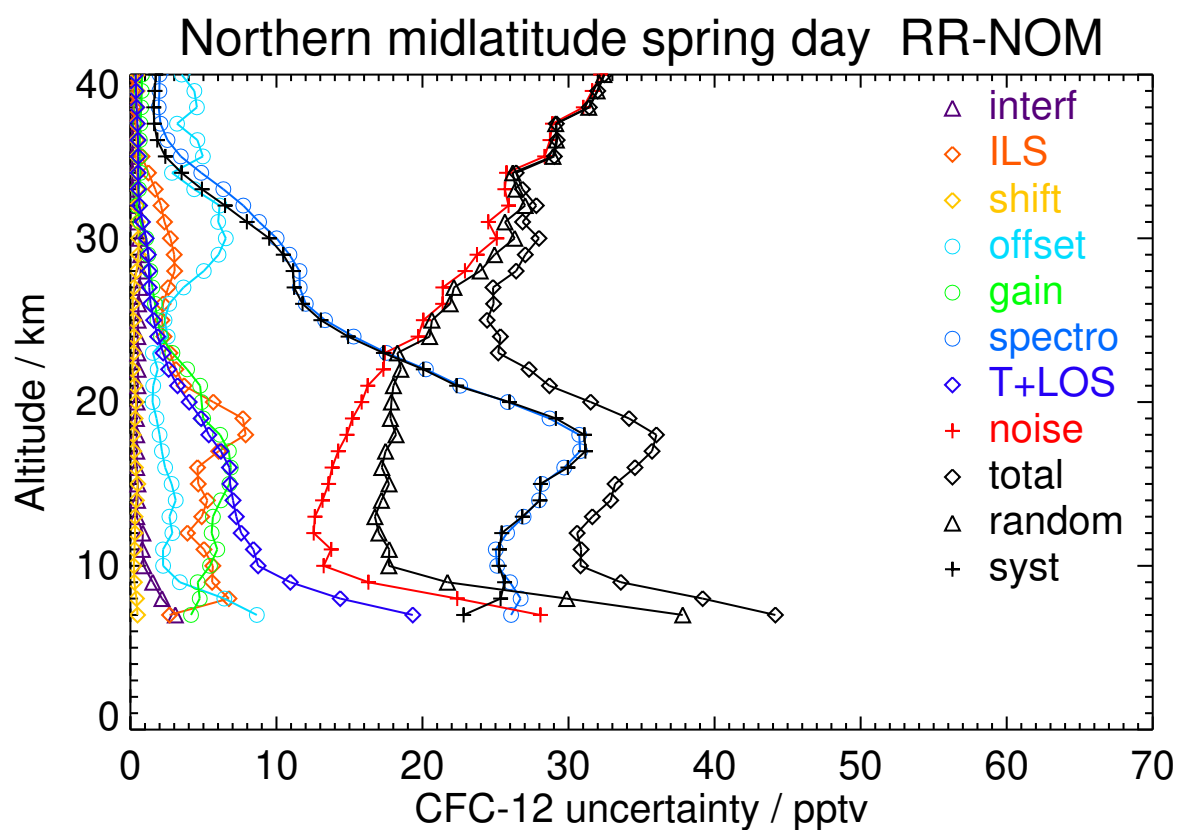

**Figure S45.** V8R\_F-12\_261 Northern midlatitude spring day

**Table S47.** CFC-12 error budget for Northern midlatitude spring night. All uncertainties are  $1\sigma$ .

| altitude<br>(km) | mean target<br>(pptv) | interf<br>(pptv) | ILS<br>(pptv) | shift<br>(pptv) | offset<br>(pptv) | gain<br>(pptv) | spectro<br>(pptv) | T+LOS<br>(pptv) | noise<br>(pptv) | random<br>(pptv) | syst<br>(pptv) | total<br>(pptv) |
|------------------|-----------------------|------------------|---------------|-----------------|------------------|----------------|-------------------|-----------------|-----------------|------------------|----------------|-----------------|
| 8                | 531.91                | 2.17             | 3.32          | 0.53            | 6.99             | 4.82           | 28.11             | 14.82           | 22.71           | 29.18            | 27.60          | 40.17           |
| 11               | 506.27                | 0.62             | 3.91          | 0.31            | 1.96             | 5.92           | 23.93             | 7.95            | 13.04           | 16.39            | 24.33          | 29.34           |
| 14               | 486.35                | 0.35             | 5.88          | 0.47            | 2.54             | 6.19           | 28.92             | 6.99            | 12.72           | 15.94            | 29.53          | 33.56           |
| 17               | 400.53                | 0.46             | 5.32          | 0.20            | 1.90             | 5.62           | 27.97             | 5.61            | 13.89           | 16.22            | 28.42          | 32.72           |
| 20               | 305.67                | 0.47             | 4.70          | 0.38            | 1.45             | 4.21           | 23.70             | 3.73            | 15.54           | 17.21            | 23.73          | 29.31           |
| 23               | 220.38                | 0.51             | 2.38          | 0.20            | 1.70             | 2.37           | 17.17             | 2.17            | 17.41           | 18.15            | 16.96          | 24.84           |
| 26               | 160.47                | 0.53             | 2.64          | 0.12            | 2.76             | 1.62           | 12.46             | 1.41            | 21.05           | 21.66            | 12.19          | 24.86           |
| 29               | 117.66                | 0.63             | 3.04          | 0.50            | 5.92             | 1.00           | 10.44             | 1.15            | 23.88           | 24.95            | 10.19          | 26.95           |
| 32               | 50.54                 | 0.27             | 1.88          | 0.36            | 5.78             | 0.40           | 6.42              | 0.59            | 25.43           | 26.22            | 6.16           | 26.93           |
| 35               | 9.02                  | 0.14             | 0.58          | 0.41            | 4.32             | 0.61           | 2.78              | 0.42            | 27.86           | 28.25            | 2.28           | 28.35           |
| 38               | -1.86                 | 0.17             | 0.16          | 0.45            | 4.11             | 0.70           | 1.68              | 0.46            | 30.72           | 31.02            | 1.51           | 31.06           |
| 41               | -11.81                | 0.19             | 0.11          | 0.48            | 4.14             | 0.77           | 1.83              | 0.42            | 33.89           | 34.17            | 1.61           | 34.20           |

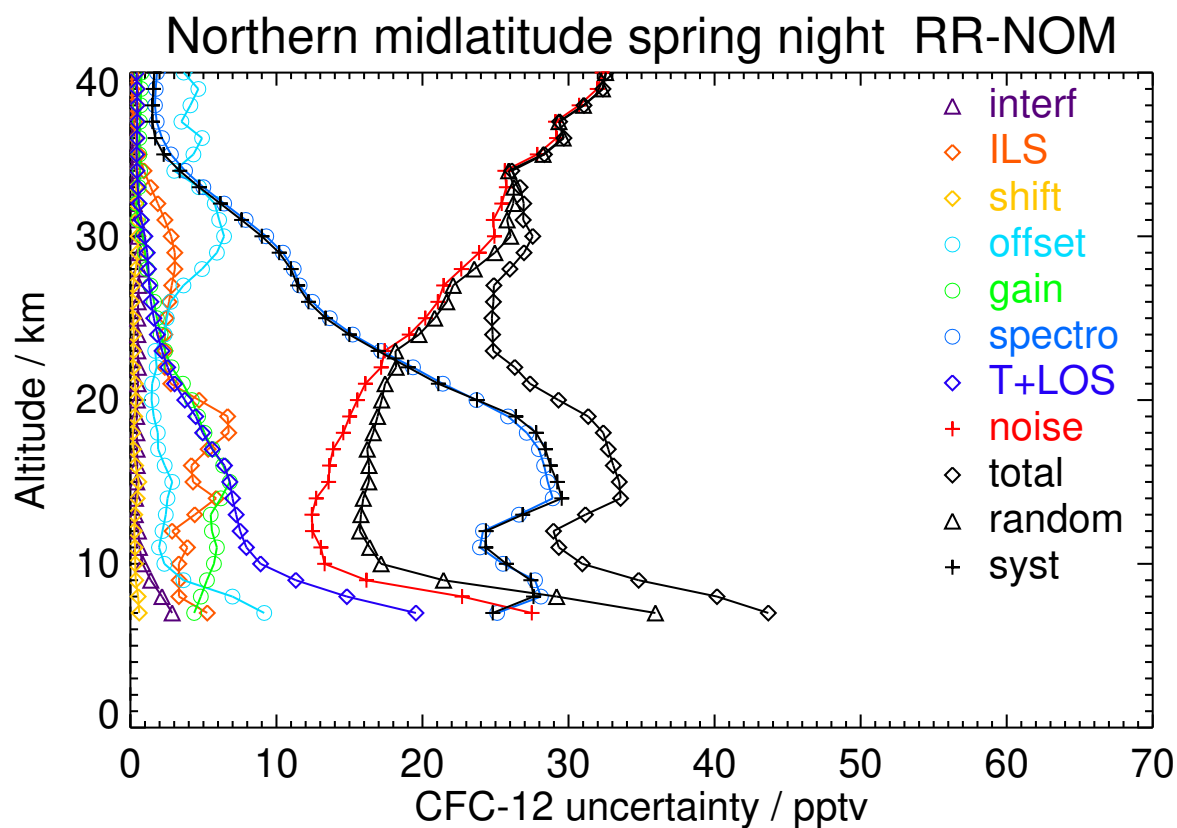

**Figure S46.** V8R\_F-12\_261 Northern midlatitude spring night

**Table S48.** CFC-12 error budget for Northern midlatitude summer day. All uncertainties are  $1\sigma$ .

| altitude<br>(km) | mean target<br>(pptv) | interf<br>(pptv) | ILS<br>(pptv) | shift<br>(pptv) | offset<br>(pptv) | gain<br>(pptv) | spectro<br>(pptv) | T+LOS<br>(pptv) | noise<br>(pptv) | random<br>(pptv) | syst<br>(pptv) | total<br>(pptv) |
|------------------|-----------------------|------------------|---------------|-----------------|------------------|----------------|-------------------|-----------------|-----------------|------------------|----------------|-----------------|
| 8                | 504.30                | 1.91             | 4.59          | 0.49            | 8.54             | 5.49           | 25.48             | 15.10           | 24.78           | 31.55            | 24.97          | 40.24           |
| 11               | 519.29                | 0.82             | 11.18         | 0.67            | 2.15             | 5.80           | 23.25             | 8.28            | 13.43           | 17.20            | 25.66          | 30.89           |
| 14               | 545.99                | 0.46             | 4.50          | 0.33            | 3.63             | 7.14           | 26.29             | 7.67            | 14.23           | 17.34            | 27.15          | 32.21           |
| 17               | 542.06                | 0.38             | 3.31          | 0.21            | 2.92             | 8.01           | 31.79             | 8.60            | 16.27           | 19.19            | 32.64          | 37.86           |
| 20               | 426.33                | 0.57             | 8.67          | 0.56            | 2.21             | 6.03           | 35.03             | 5.64            | 16.87           | 18.32            | 36.40          | 40.75           |
| 23               | 273.67                | 0.57             | 3.27          | 0.20            | 1.74             | 2.98           | 23.00             | 3.28            | 18.42           | 19.06            | 23.21          | 30.03           |
| 26               | 174.52                | 0.62             | 3.32          | 0.18            | 1.80             | 1.84           | 13.75             | 1.78            | 18.91           | 19.30            | 13.97          | 23.83           |
| 29               | 134.98                | 0.82             | 2.51          | 0.51            | 5.28             | 1.02           | 9.90              | 1.21            | 22.84           | 23.63            | 9.96           | 25.64           |
| 32               | 73.23                 | 0.33             | 1.64          | 0.30            | 5.81             | 0.28           | 7.08              | 0.53            | 23.73           | 24.52            | 6.99           | 25.50           |
| 35               | 28.35                 | 0.14             | 0.53          | 0.41            | 4.94             | 0.72           | 3.85              | 0.50            | 26.73           | 27.25            | 3.48           | 27.47           |
| 38               | -0.90                 | 0.18             | 0.28          | 0.42            | 4.46             | 0.68           | 2.09              | 0.49            | 29.45           | 29.82            | 1.83           | 29.88           |
| 41               | -3.53                 | 0.19             | 0.25          | 0.47            | 4.13             | 0.76           | 1.89              | 0.47            | 32.62           | 32.91            | 1.69           | 32.95           |

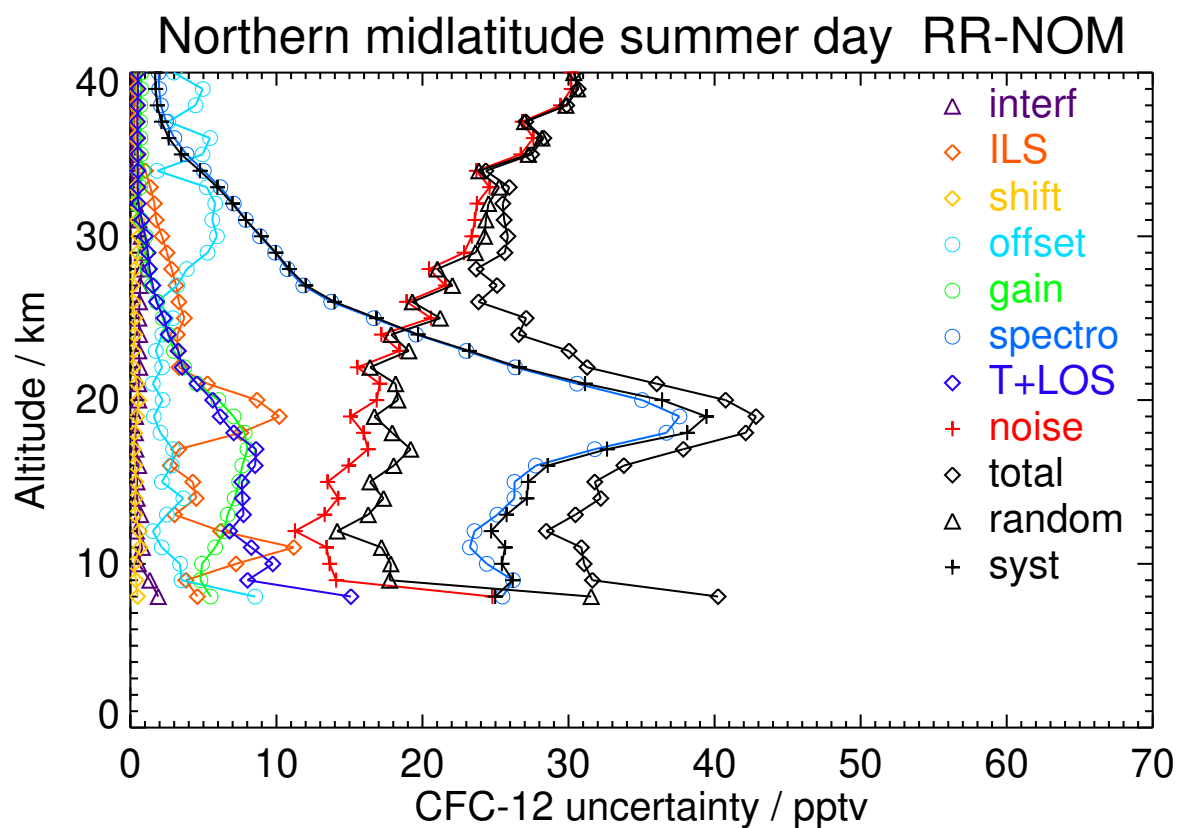

**Figure S47.** V8R\_F-12\_261 Northern midlatitude summer day

**Table S49.** CFC-12 error budget for Northern midlatitude summer night. All uncertainties are  $1\sigma$ .

| altitude<br>(km) | mean target<br>(pptv) | interf<br>(pptv) | ILS<br>(pptv) | shift<br>(pptv) | offset<br>(pptv) | gain<br>(pptv) | spectro<br>(pptv) | T+LOS<br>(pptv) | noise<br>(pptv) | random<br>(pptv) | syst<br>(pptv) | total<br>(pptv) |
|------------------|-----------------------|------------------|---------------|-----------------|------------------|----------------|-------------------|-----------------|-----------------|------------------|----------------|-----------------|
| 8                | 512.08                | 1.91             | 5.83          | 0.14            | 8.74             | 3.33           | 25.16             | 15.18           | 23.72           | 30.23            | 25.25          | 39.38           |
| 11               | 527.21                | 0.60             | 6.11          | 0.23            | 2.55             | 5.96           | 24.28             | 8.07            | 12.86           | 16.30            | 25.17          | 29.99           |
| 14               | 541.23                | 0.52             | 2.80          | 0.31            | 2.63             | 6.69           | 23.62             | 7.95            | 13.83           | 16.77            | 24.32          | 29.54           |
| 17               | 516.88                | 0.38             | 3.63          | 0.10            | 2.46             | 7.63           | 28.50             | 7.88            | 15.28           | 18.57            | 28.99          | 34.43           |
| 20               | 417.36                | 0.43             | 7.92          | 0.49            | 1.81             | 5.11           | 31.58             | 5.22            | 16.13           | 17.83            | 32.55          | 37.11           |
| 23               | 274.14                | 0.57             | 3.45          | 0.28            | 1.72             | 2.91           | 23.75             | 3.29            | 17.59           | 18.32            | 23.92          | 30.14           |
| 26               | 176.54                | 0.58             | 2.84          | 0.24            | 2.09             | 1.55           | 13.28             | 1.76            | 19.41           | 19.87            | 13.30          | 23.90           |
| 29               | 132.69                | 0.78             | 3.06          | 0.50            | 5.25             | 1.00           | 10.62             | 1.28            | 22.56           | 23.35            | 10.82          | 25.73           |
| 32               | 58.87                 | 0.34             | 1.79          | 0.33            | 5.77             | 0.27           | 6.70              | 0.65            | 23.51           | 24.30            | 6.64           | 25.19           |
| 35               | 24.17                 | 0.13             | 0.45          | 0.41            | 4.62             | 0.74           | 2.83              | 0.45            | 26.31           | 26.77            | 2.50           | 26.89           |
| 38               | 12.76                 | 0.17             | 0.22          | 0.43            | 4.15             | 0.69           | 2.14              | 0.50            | 29.10           | 29.43            | 1.90           | 29.49           |
| 41               | -11.00                | 0.19             | 0.12          | 0.44            | 3.98             | 0.81           | 1.97              | 0.42            | 32.18           | 32.45            | 1.91           | 32.50           |

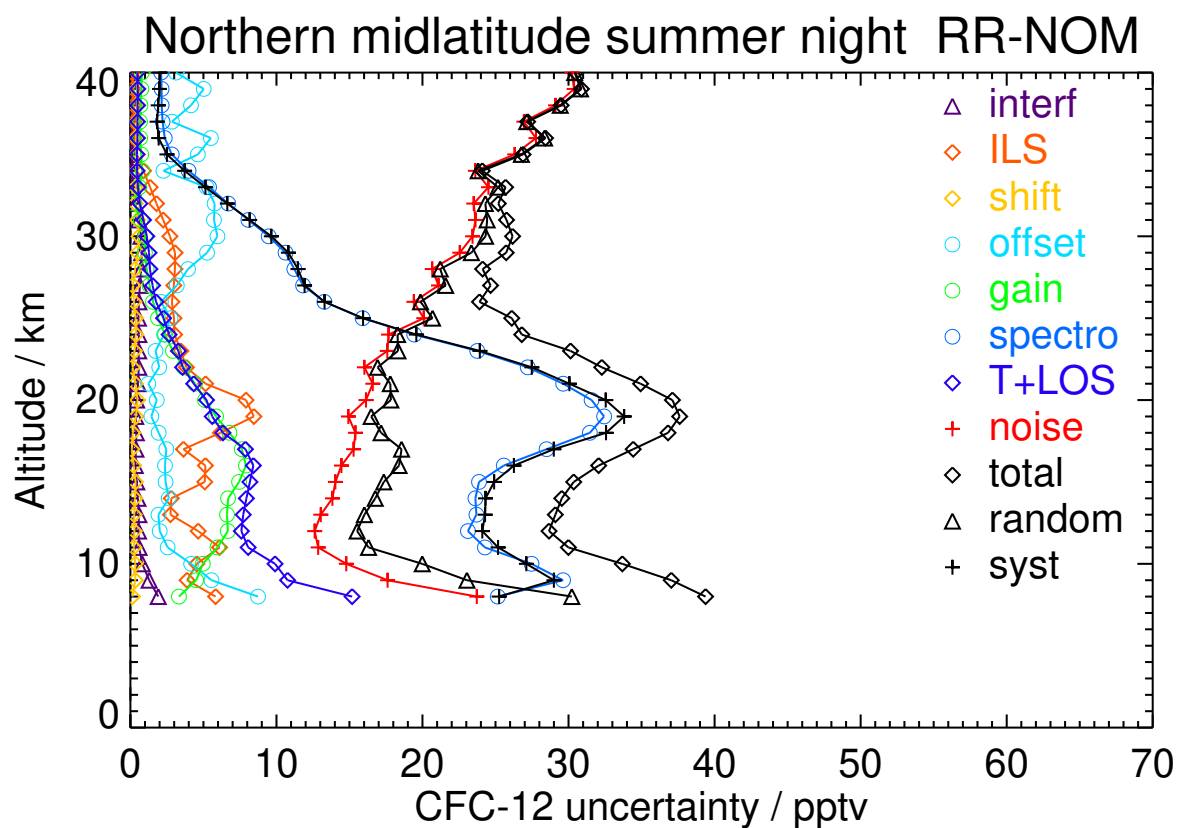

**Figure S48.** V8R\_F-12\_261 Northern midlatitude summer night

**Table S50.** CFC-12 error budget for Northern midlatitude autumn day. All uncertainties are  $1\sigma$ .

| altitude<br>(km) | mean target<br>(pptv) | interf<br>(pptv) | ILS<br>(pptv) | shift<br>(pptv) | offset<br>(pptv) | gain<br>(pptv) | spectro<br>(pptv) | T+LOS<br>(pptv) | noise<br>(pptv) | random<br>(pptv) | syst<br>(pptv) | total<br>(pptv) |
|------------------|-----------------------|------------------|---------------|-----------------|------------------|----------------|-------------------|-----------------|-----------------|------------------|----------------|-----------------|
| 8                | 502.86                | 1.67             | 5.59          | 0.29            | 8.41             | 3.09           | 25.18             | 14.32           | 24.52           | 30.64            | 24.82          | 39.43           |
| 11               | 532.27                | 0.44             | 8.26          | 0.33            | 1.84             | 6.40           | 23.22             | 7.79            | 13.79           | 16.56            | 25.07          | 30.05           |
| 14               | 540.27                | 0.34             | 3.49          | 0.40            | 3.90             | 6.37           | 25.59             | 8.10            | 14.75           | 17.82            | 26.24          | 31.72           |
| 17               | 516.21                | 0.35             | 3.35          | 0.28            | 2.59             | 7.41           | 31.91             | 7.96            | 16.08           | 18.76            | 32.58          | 37.59           |
| 20               | 412.79                | 0.41             | 9.05          | 0.66            | 2.08             | 5.92           | 33.56             | 5.36            | 17.19           | 18.71            | 34.96          | 39.65           |
| 23               | 276.28                | 0.50             | 3.64          | 0.17            | 1.71             | 2.88           | 23.74             | 3.15            | 19.23           | 20.31            | 23.58          | 31.12           |
| 26               | 182.09                | 0.57             | 3.19          | 0.10            | 1.98             | 1.74           | 15.43             | 1.80            | 19.97           | 20.55            | 15.33          | 25.64           |
| 29               | 118.80                | 0.65             | 2.49          | 0.47            | 5.92             | 1.21           | 10.13             | 1.18            | 24.70           | 25.57            | 10.17          | 27.52           |
| 32               | 68.32                 | 0.31             | 1.57          | 0.29            | 6.29             | 0.39           | 6.85              | 0.56            | 25.95           | 26.88            | 6.36           | 27.62           |
| 35               | 29.63                 | 0.12             | 0.56          | 0.40            | 4.30             | 0.56           | 3.92              | 0.43            | 28.59           | 28.99            | 3.46           | 29.19           |
| 38               | 4.55                  | 0.16             | 0.14          | 0.40            | 3.83             | 0.57           | 2.35              | 0.48            | 32.08           | 32.35            | 1.87           | 32.41           |
| 41               | 3.30                  | 0.18             | 0.19          | 0.46            | 4.39             | 0.61           | 1.62              | 0.43            | 35.87           | 36.16            | 1.41           | 36.18           |

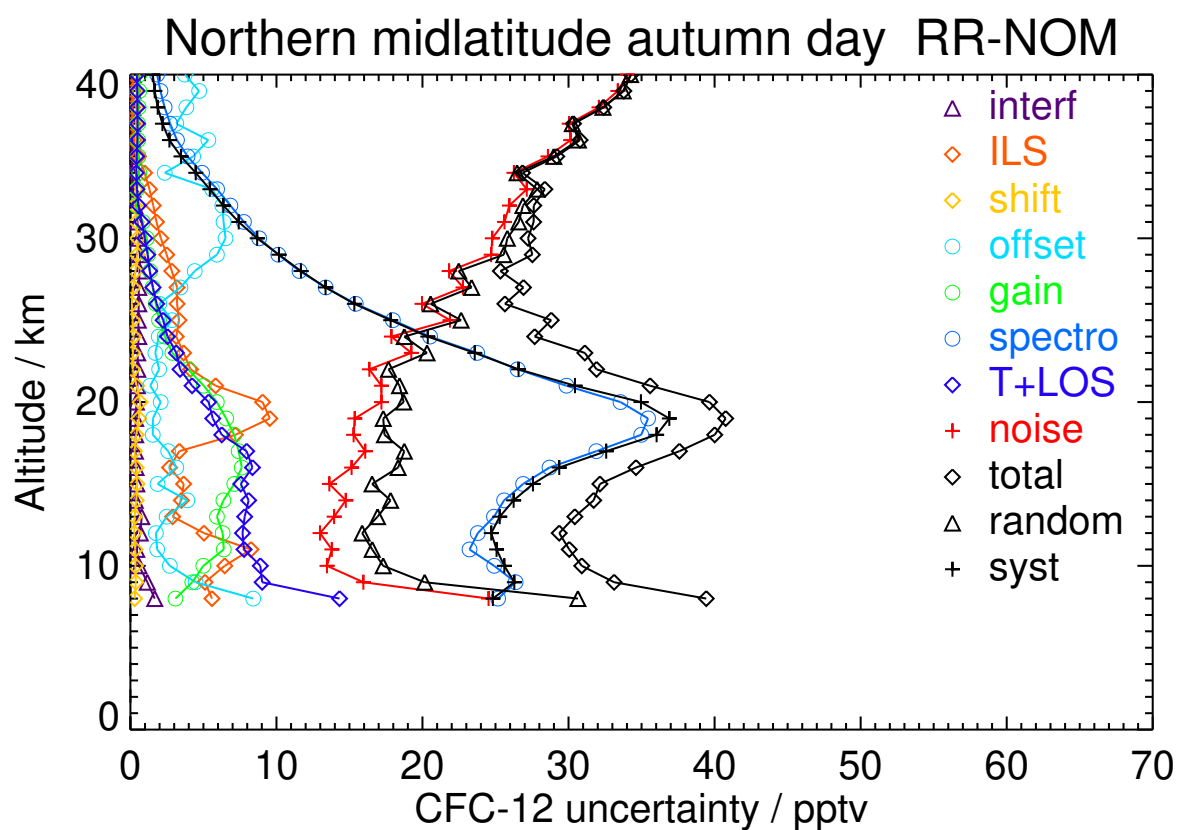

**Figure S49.** V8R\_F-12\_261 Northern midlatitude autumn day

**Table S51.** CFC-12 error budget for Northern midlatitude autumn night. All uncertainties are  $1\sigma$ .

| altitude<br>(km) | mean target<br>(pptv) | interf<br>(pptv) | ILS<br>(pptv) | shift<br>(pptv) | offset<br>(pptv) | gain<br>(pptv) | spectro<br>(pptv) | T+LOS<br>(pptv) | noise<br>(pptv) | random<br>(pptv) | syst<br>(pptv) | total<br>(pptv) |
|------------------|-----------------------|------------------|---------------|-----------------|------------------|----------------|-------------------|-----------------|-----------------|------------------|----------------|-----------------|
| 8                | 535.77                | 1.86             | 3.35          | 0.48            | 8.27             | 4.43           | 29.85             | 14.52           | 23.34           | 29.78            | 29.37          | 41.82           |
| 11               | 526.64                | 0.60             | 6.75          | 0.23            | 2.23             | 6.17           | 23.70             | 8.18            | 14.03           | 17.44            | 24.71          | 30.24           |
| 14               | 538.27                | 0.42             | 3.50          | 0.37            | 2.99             | 6.27           | 25.16             | 8.14            | 14.54           | 18.00            | 25.44          | 31.17           |
| 17               | 503.88                | 0.37             | 3.31          | 0.34            | 2.41             | 6.91           | 30.45             | 7.38            | 15.45           | 18.48            | 30.72          | 35.85           |
| 20               | 395.55                | 0.40             | 8.24          | 0.58            | 1.83             | 5.33           | 32.22             | 5.15            | 16.70           | 18.53            | 33.17          | 38.00           |
| 23               | 254.77                | 0.52             | 4.04          | 0.29            | 1.85             | 2.90           | 23.42             | 2.99            | 18.66           | 20.83            | 22.36          | 30.56           |
| 26               | 174.74                | 0.56             | 3.15          | 0.11            | 2.18             | 1.62           | 14.27             | 1.69            | 20.30           | 20.89            | 14.13          | 25.22           |
| 29               | 113.34                | 0.63             | 2.78          | 0.47            | 5.84             | 1.15           | 10.65             | 1.14            | 24.41           | 25.56            | 10.05          | 27.46           |
| 32               | 64.85                 | 0.31             | 1.57          | 0.29            | 6.29             | 0.41           | 6.72              | 0.52            | 25.81           | 26.80            | 5.99           | 27.46           |
| 35               | 28.06                 | 0.12             | 0.73          | 0.41            | 4.28             | 0.57           | 3.93              | 0.47            | 28.54           | 28.97            | 3.18           | 29.14           |
| 38               | 11.14                 | 0.15             | 0.25          | 0.42            | 3.94             | 0.59           | 2.34              | 0.45            | 31.82           | 32.12            | 1.69           | 32.17           |
| 41               | 14.36                 | 0.17             | 0.19          | 0.47            | 4.22             | 0.72           | 2.06              | 0.42            | 35.18           | 35.47            | 1.72           | 35.51           |

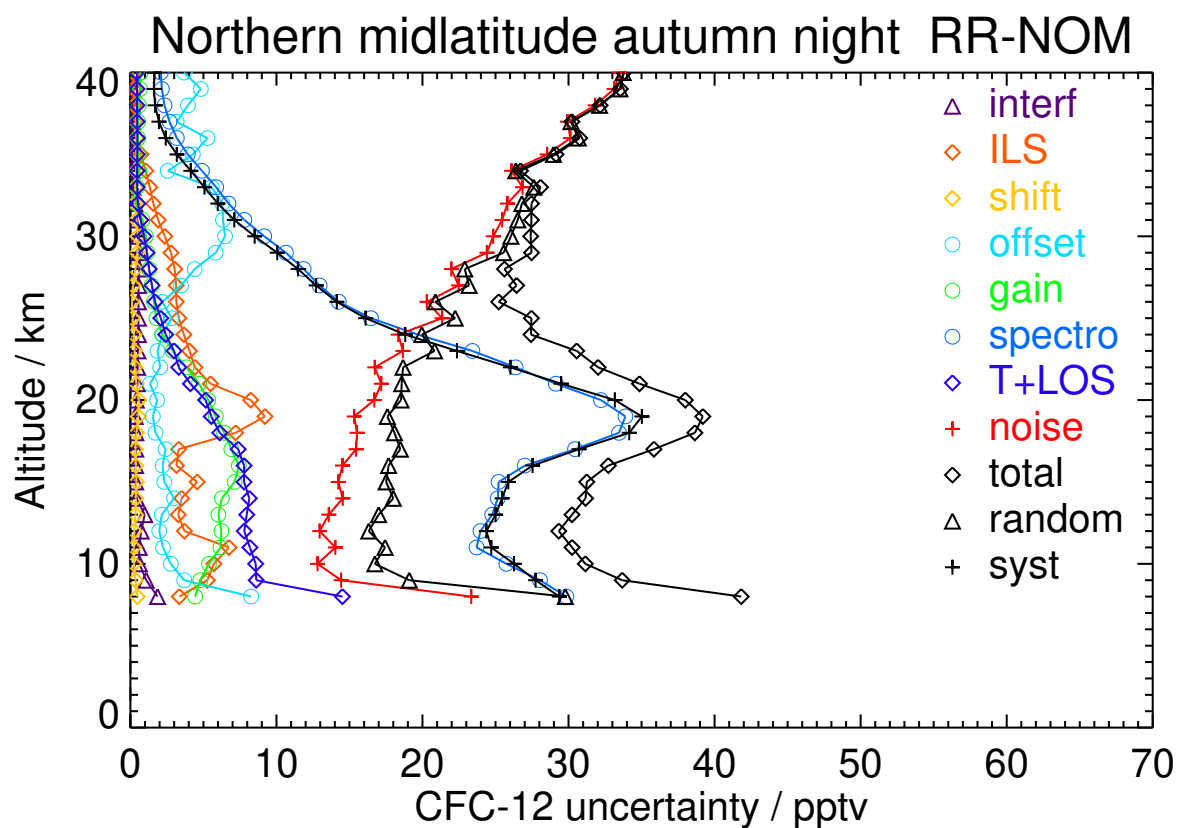

**Figure S50.** V8R\_F-12\_261 Northern midlatitude autumn night

**Table S52.** CFC-12 error budget for Tropics day. All uncertainties are  $1\sigma$ .

| altitude<br>(km) | mean target<br>(pptv) | interf<br>(pptv) | ILS<br>(pptv) | shift<br>(pptv) | offset<br>(pptv) | gain<br>(pptv) | spectro<br>(pptv) | T+LOS<br>(pptv) | noise<br>(pptv) | random<br>(pptv) | syst<br>(pptv) | total<br>(pptv) |
|------------------|-----------------------|------------------|---------------|-----------------|------------------|----------------|-------------------|-----------------|-----------------|------------------|----------------|-----------------|
| 11               | 533.26                | 0.69             | 4.49          | 0.22            | 5.32             | 5.36           | 27.08             | 10.57           | 17.95           | 22.72            | 26.99          | 35.28           |
| 14               | 555.01                | 0.31             | 6.39          | 0.16            | 2.13             | 8.32           | 23.35             | 8.59            | 14.90           | 18.30            | 24.92          | 30.92           |
| 17               | 551.05                | 0.70             | 4.81          | 0.21            | 3.18             | 7.31           | 32.35             | 10.26           | 17.92           | 21.84            | 32.91          | 39.50           |
| 20               | 501.78                | 0.61             | 5.84          | 0.35            | 2.34             | 6.32           | 29.64             | 5.03            | 17.72           | 19.61            | 30.22          | 36.02           |
| 23               | 417.02                | 0.55             | 3.60          | 0.70            | 1.74             | 3.70           | 27.94             | 3.87            | 18.51           | 19.52            | 28.07          | 34.19           |
| 26               | 375.60                | 0.64             | 4.49          | 0.46            | 2.38             | 2.82           | 23.16             | 2.76            | 20.19           | 21.38            | 23.00          | 31.40           |
| 29               | 309.78                | 0.80             | 6.49          | 0.86            | 5.70             | 2.70           | 20.81             | 2.54            | 23.31           | 24.48            | 21.60          | 32.65           |
| 32               | 220.09                | 0.33             | 5.57          | 1.00            | 4.37             | 1.15           | 17.59             | 1.64            | 24.63           | 25.54            | 17.86          | 31.17           |
| 35               | 100.76                | 0.14             | 2.22          | 0.66            | 2.99             | 1.46           | 11.27             | 0.97            | 25.00           | 25.43            | 11.07          | 27.74           |
| 38               | 27.57                 | 0.17             | 0.36          | 0.41            | 3.98             | 0.84           | 5.02              | 0.79            | 28.85           | 29.19            | 4.78           | 29.58           |
| 41               | -4.82                 | 0.19             | 0.14          | 0.45            | 3.99             | 0.90           | 2.39              | 0.50            | 31.91           | 32.18            | 2.32           | 32.27           |

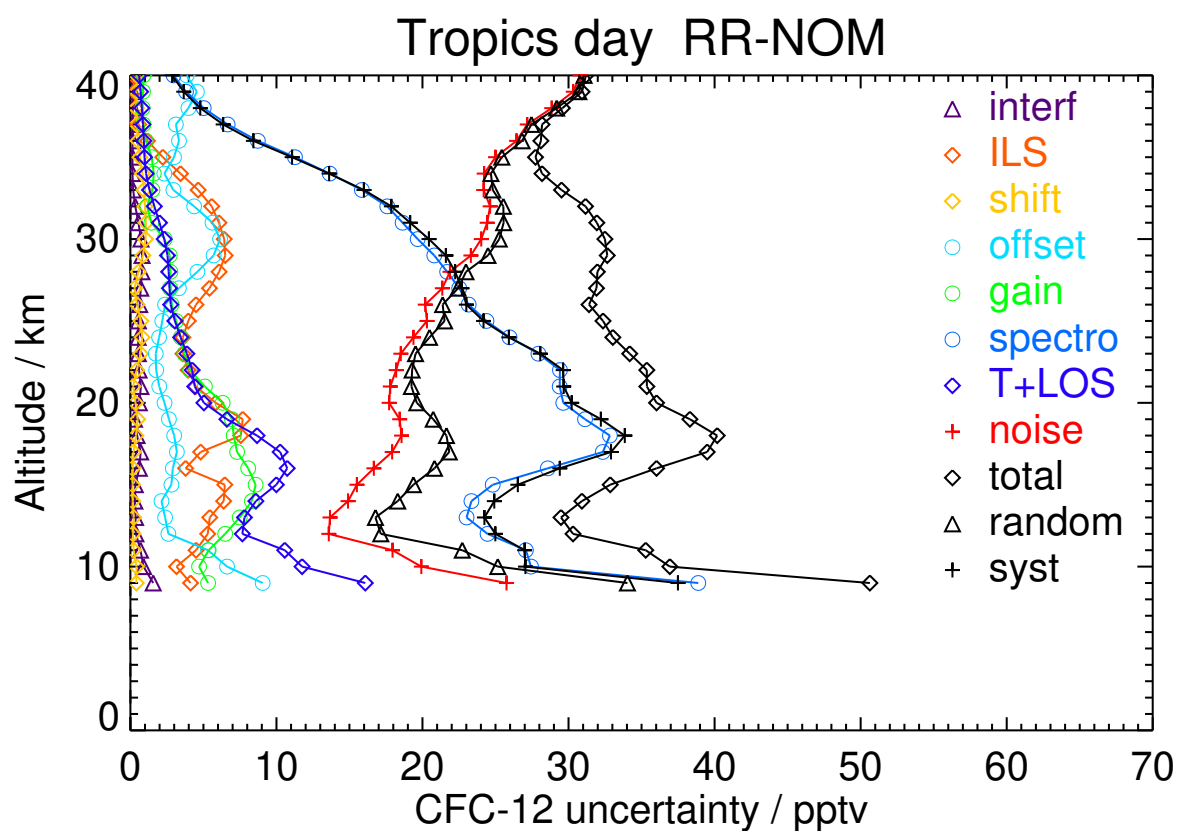

**Figure S51.** V8R\_F-12\_261 Tropics day

**Table S53.** CFC-12 error budget for Tropics night. All uncertainties are  $1\sigma$ .

| altitude<br>(km) | mean target<br>(pptv) | interf<br>(pptv) | ILS<br>(pptv) | shift<br>(pptv) | offset<br>(pptv) | gain<br>(pptv) | spectro<br>(pptv) | T+LOS<br>(pptv) | noise<br>(pptv) | random<br>(pptv) | syst<br>(pptv) | total<br>(pptv) |
|------------------|-----------------------|------------------|---------------|-----------------|------------------|----------------|-------------------|-----------------|-----------------|------------------|----------------|-----------------|
| 11               | 531.63                | 0.67             | 4.70          | 0.18            | 4.94             | 5.34           | 25.16             | 10.28           | 17.10           | 21.27            | 25.57          | 33.26           |
| 14               | 568.21                | 0.34             | 5.65          | 0.18            | 2.05             | 8.88           | 23.98             | 9.07            | 14.83           | 18.10            | 25.79          | 31.50           |
| 17               | 549.84                | 0.79             | 5.06          | 0.19            | 3.30             | 7.36           | 30.70             | 10.73           | 18.06           | 22.17            | 31.36          | 38.41           |
| 20               | 498.18                | 0.61             | 6.15          | 0.23            | 2.30             | 7.10           | 29.00             | 5.32            | 18.02           | 19.84            | 29.90          | 35.89           |
| 23               | 413.35                | 0.58             | 3.54          | 0.72            | 1.71             | 3.27           | 27.32             | 3.99            | 18.64           | 19.73            | 27.34          | 33.72           |
| 26               | 367.30                | 0.64             | 4.45          | 0.36            | 2.31             | 2.86           | 22.39             | 2.80            | 20.07           | 20.92            | 22.53          | 30.75           |
| 29               | 312.80                | 0.79             | 5.74          | 0.80            | 5.61             | 3.20           | 20.04             | 2.51            | 23.29           | 24.31            | 20.86          | 32.04           |
| 32               | 230.93                | 0.33             | 5.17          | 1.04            | 4.08             | 1.34           | 18.46             | 1.98            | 24.63           | 25.50            | 18.63          | 31.58           |
| 35               | 95.02                 | 0.15             | 2.38          | 0.76            | 2.84             | 1.32           | 12.15             | 1.12            | 25.08           | 25.55            | 11.89          | 28.18           |
| 38               | 10.20                 | 0.17             | 0.20          | 0.41            | 3.79             | 0.71           | 4.44              | 0.70            | 29.05           | 29.36            | 4.16           | 29.65           |
| 41               | -7.26                 | 0.20             | 0.17          | 0.43            | 4.02             | 0.96           | 2.02              | 0.49            | 32.09           | 32.38            | 1.84           | 32.43           |

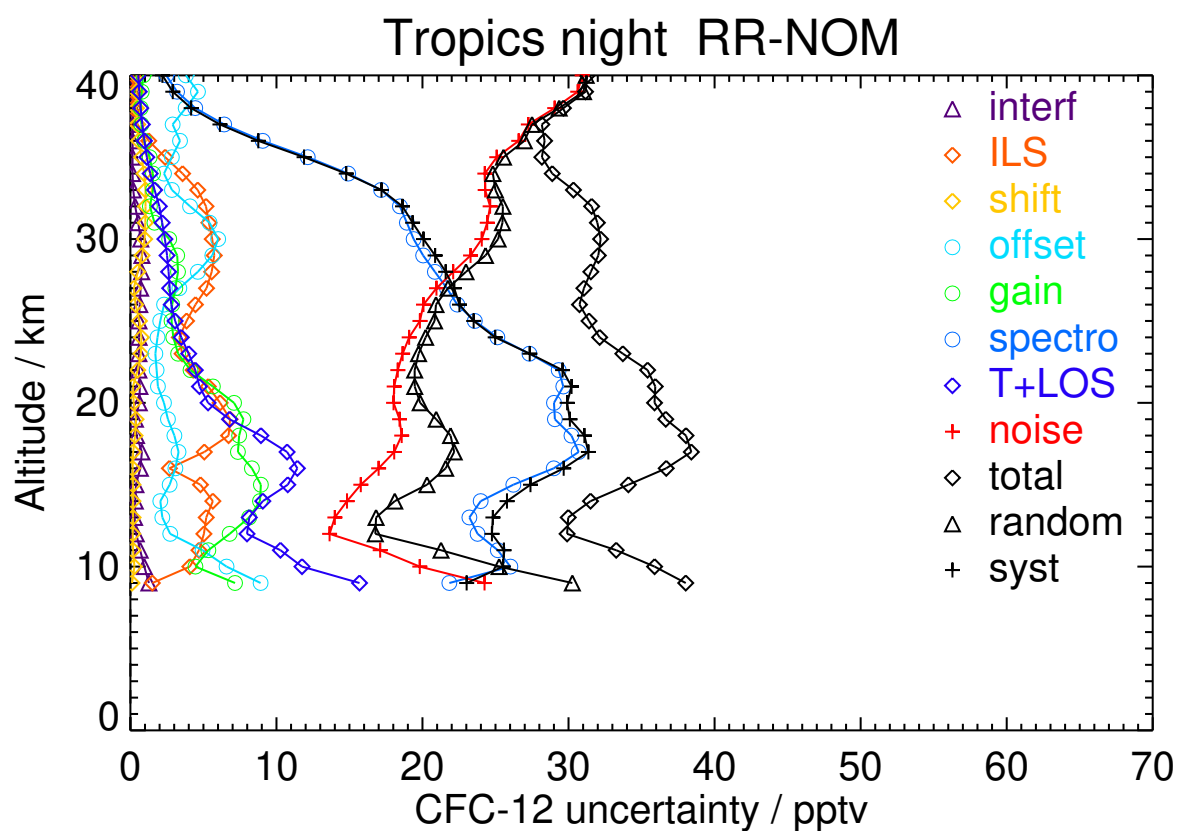

**Figure S52.** V8R\_F-12\_261 Tropics night

**Table S54.** CFC-12 error budget for Southern midlatitude winter day. All uncertainties are  $1\sigma$ .

| altitude<br>(km) | mean target<br>(pptv) | interf<br>(pptv) | ILS<br>(pptv) | shift<br>(pptv) | offset<br>(pptv) | gain<br>(pptv) | spectro<br>(pptv) | T+LOS<br>(pptv) | noise<br>(pptv) | random<br>(pptv) | syst<br>(pptv) | total<br>(pptv) |
|------------------|-----------------------|------------------|---------------|-----------------|------------------|----------------|-------------------|-----------------|-----------------|------------------|----------------|-----------------|
| 8                | 543.81                | 1.13             | 6.24          | 0.42            | 2.52             | 5.42           | 29.21             | 9.08            | 12.88           | 17.08            | 29.76          | 34.31           |
| 11               | 522.96                | 1.11             | 2.18          | 0.41            | 2.53             | 5.93           | 26.44             | 8.33            | 12.92           | 16.40            | 26.72          | 31.35           |
| 14               | 481.31                | 0.35             | 4.19          | 0.51            | 2.83             | 6.47           | 28.31             | 7.25            | 13.65           | 16.46            | 28.93          | 33.29           |
| 17               | 411.58                | 0.41             | 5.80          | 0.59            | 2.04             | 6.71           | 31.53             | 6.03            | 14.73           | 16.95            | 32.30          | 36.48           |
| 20               | 301.08                | 0.37             | 5.15          | 0.36            | 1.66             | 4.49           | 23.35             | 3.72            | 16.85           | 17.97            | 23.87          | 29.88           |
| 23               | 223.58                | 0.38             | 3.18          | 0.12            | 1.76             | 2.96           | 20.14             | 2.44            | 19.28           | 19.97            | 20.15          | 28.37           |
| 26               | 128.99                | 0.29             | 3.33          | 0.16            | 3.33             | 1.57           | 13.79             | 1.71            | 23.75           | 24.36            | 13.72          | 27.96           |
| 29               | 83.55                 | 0.26             | 2.42          | 0.30            | 7.49             | 0.87           | 8.60              | 1.11            | 28.10           | 29.38            | 8.06           | 30.46           |
| 32               | 56.06                 | 0.22             | 1.70          | 0.21            | 7.55             | 0.47           | 6.47              | 0.64            | 32.08           | 33.20            | 5.41           | 33.64           |
| 35               | 14.83                 | 0.28             | 1.28          | 0.39            | 5.30             | 0.36           | 4.41              | 0.71            | 35.41           | 36.00            | 2.82           | 36.11           |
| 38               | -8.05                 | 0.39             | 1.20          | 0.44            | 5.86             | 0.37           | 2.78              | 0.87            | 39.27           | 39.81            | 1.31           | 39.83           |
| 41               | -8.54                 | 0.48             | 1.43          | 0.41            | 7.71             | 0.46           | 2.12              | 0.96            | 41.96           | 42.74            | 1.34           | 42.76           |

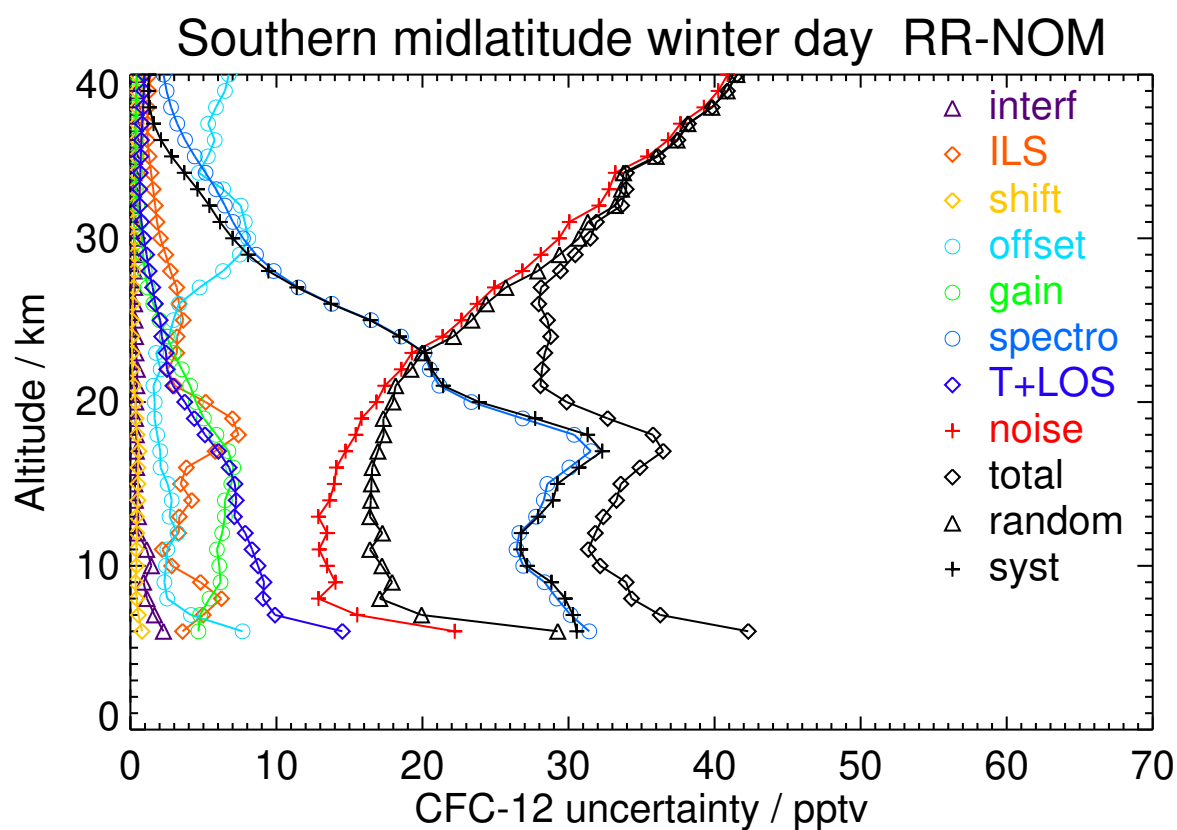

**Figure S53.** V8R\_F-12\_261 Southern midlatitude winter day

**Table S55.** CFC-12 error budget for Southern midlatitude winter night. All uncertainties are  $1\sigma$ .

| altitude<br>(km) | mean target<br>(pptv) | interf<br>(pptv) | ILS<br>(pptv) | shift<br>(pptv) | offset<br>(pptv) | gain<br>(pptv) | spectro<br>(pptv) | T+LOS<br>(pptv) | noise<br>(pptv) | random<br>(pptv) | syst<br>(pptv) | total<br>(pptv) |
|------------------|-----------------------|------------------|---------------|-----------------|------------------|----------------|-------------------|-----------------|-----------------|------------------|----------------|-----------------|
| 8                | 532.72                | 1.35             | 5.69          | 0.35            | 2.20             | 5.18           | 24.28             | 9.25            | 13.08           | 17.72            | 24.46          | 30.20           |
| 11               | 518.38                | 0.99             | 2.17          | 0.33            | 3.25             | 5.87           | 24.03             | 8.53            | 12.92           | 16.76            | 24.23          | 29.46           |
| 14               | 479.42                | 0.37             | 4.54          | 0.48            | 3.34             | 6.06           | 26.17             | 7.18            | 13.77           | 17.04            | 26.54          | 31.54           |
| 17               | 420.62                | 0.43             | 5.26          | 0.36            | 2.18             | 5.95           | 28.86             | 6.11            | 14.89           | 17.09            | 29.47          | 34.07           |
| 20               | 315.35                | 0.37             | 6.10          | 0.42            | 1.92             | 4.10           | 24.52             | 3.94            | 16.89           | 18.28            | 25.02          | 30.99           |
| 23               | 220.77                | 0.42             | 2.81          | 0.17            | 1.97             | 2.61           | 20.46             | 2.56            | 20.00           | 20.72            | 20.36          | 29.05           |
| 26               | 119.25                | 0.36             | 2.62          | 0.13            | 3.05             | 1.42           | 12.76             | 1.55            | 22.80           | 23.26            | 12.74          | 26.52           |
| 29               | 71.01                 | 0.34             | 1.90          | 0.25            | 7.46             | 0.78           | 7.57              | 0.96            | 28.72           | 29.87            | 7.16           | 30.71           |
| 32               | 46.35                 | 0.22             | 1.33          | 0.17            | 8.01             | 0.47           | 5.37              | 0.66            | 31.18           | 32.31            | 4.81           | 32.67           |
| 35               | 17.41                 | 0.18             | 0.73          | 0.32            | 4.32             | 0.25           | 3.58              | 0.52            | 33.74           | 34.12            | 2.60           | 34.22           |
| 38               | 0.77                  | 0.29             | 0.55          | 0.38            | 4.89             | 0.31           | 2.07              | 0.62            | 37.52           | 37.89            | 1.03           | 37.91           |
| 41               | -0.39                 | 0.33             | 0.65          | 0.38            | 7.16             | 0.47           | 1.29              | 0.65            | 40.70           | 41.36            | 0.82           | 41.36           |

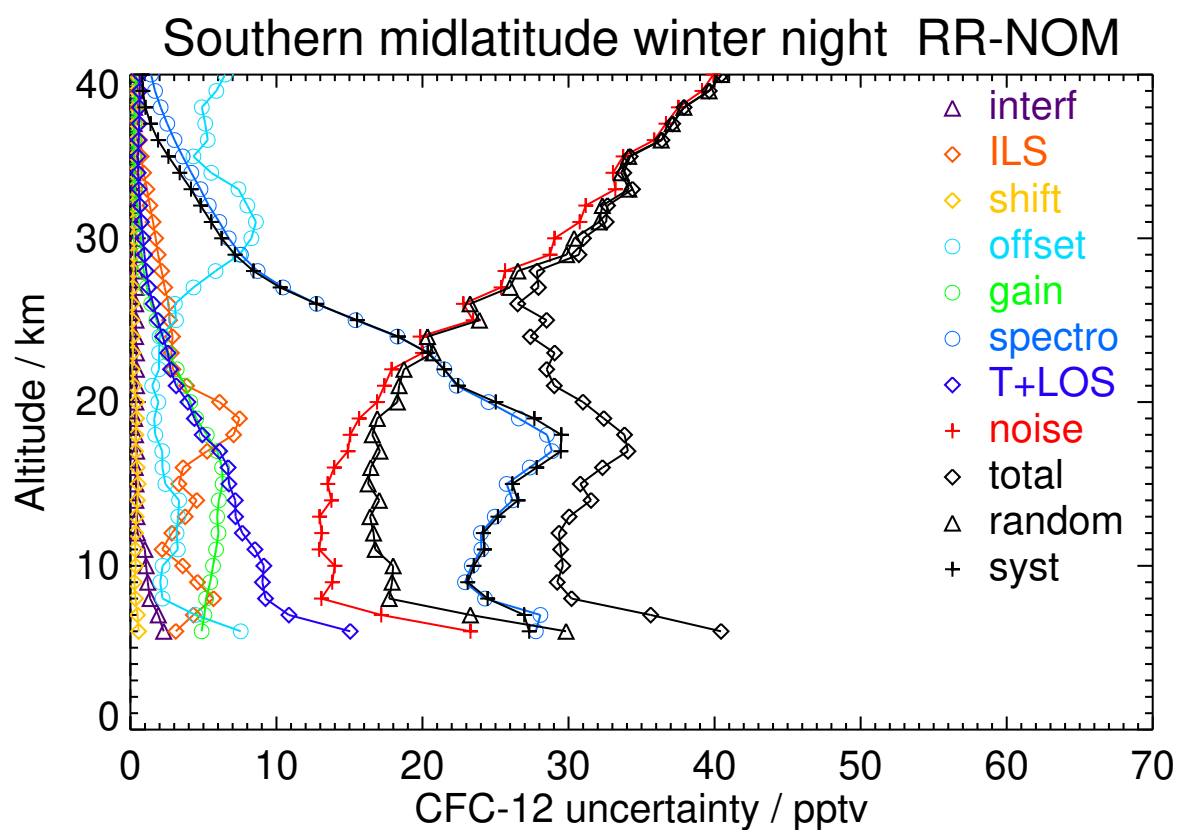

**Figure S54.** V8R\_F-12\_261 Southern midlatitude winter night

**Table S56.** CFC-12 error budget for Southern midlatitude spring day. All uncertainties are  $1\sigma$ .

| altitude<br>(km) | mean target<br>(pptv) | interf<br>(pptv) | ILS<br>(pptv) | shift<br>(pptv) | offset<br>(pptv) | gain<br>(pptv) | spectro<br>(pptv) | T+LOS<br>(pptv) | noise<br>(pptv) | random<br>(pptv) | syst<br>(pptv) | total<br>(pptv) |
|------------------|-----------------------|------------------|---------------|-----------------|------------------|----------------|-------------------|-----------------|-----------------|------------------|----------------|-----------------|
| 8                | 537.35                | 1.37             | 5.05          | 0.45            | 2.21             | 6.09           | 28.49             | 9.45            | 13.36           | 17.54            | 29.01          | 33.90           |
| 11               | 509.09                | 0.58             | 2.75          | 0.35            | 2.07             | 6.45           | 26.67             | 8.21            | 12.52           | 16.66            | 26.68          | 31.45           |
| 14               | 463.44                | 0.42             | 6.20          | 0.44            | 3.06             | 5.73           | 28.37             | 7.38            | 13.59           | 19.23            | 27.49          | 33.54           |
| 17               | 366.00                | 0.62             | 6.50          | 0.25            | 1.97             | 5.20           | 30.18             | 5.86            | 13.96           | 17.99            | 29.83          | 34.84           |
| 20               | 228.23                | 0.61             | 4.60          | 0.25            | 1.62             | 3.62           | 20.08             | 3.27            | 14.97           | 19.34            | 17.36          | 25.99           |
| 23               | 211.13                | 0.67             | 2.08          | 0.21            | 1.60             | 2.35           | 13.74             | 1.76            | 16.92           | 19.16            | 11.13          | 22.16           |
| 26               | 197.40                | 0.65             | 1.61          | 0.15            | 2.36             | 1.91           | 12.35             | 1.28            | 19.92           | 20.44            | 12.06          | 23.74           |
| 29               | 167.55                | 0.76             | 2.78          | 0.49            | 5.52             | 1.41           | 12.29             | 1.25            | 23.29           | 24.38            | 11.91          | 27.13           |
| 32               | 99.62                 | 0.29             | 2.35          | 0.41            | 6.17             | 0.68           | 10.04             | 0.81            | 24.70           | 25.71            | 9.74           | 27.49           |
| 35               | 25.18                 | 0.15             | 0.84          | 0.46            | 4.49             | 0.65           | 4.91              | 0.54            | 27.55           | 28.03            | 4.41           | 28.37           |
| 38               | 2.09                  | 0.17             | 0.28          | 0.44            | 3.88             | 0.66           | 2.14              | 0.42            | 30.45           | 30.73            | 1.82           | 30.78           |
| 41               | -6.77                 | 0.19             | 0.15          | 0.48            | 3.81             | 0.71           | 1.79              | 0.39            | 33.94           | 34.18            | 1.54           | 34.21           |

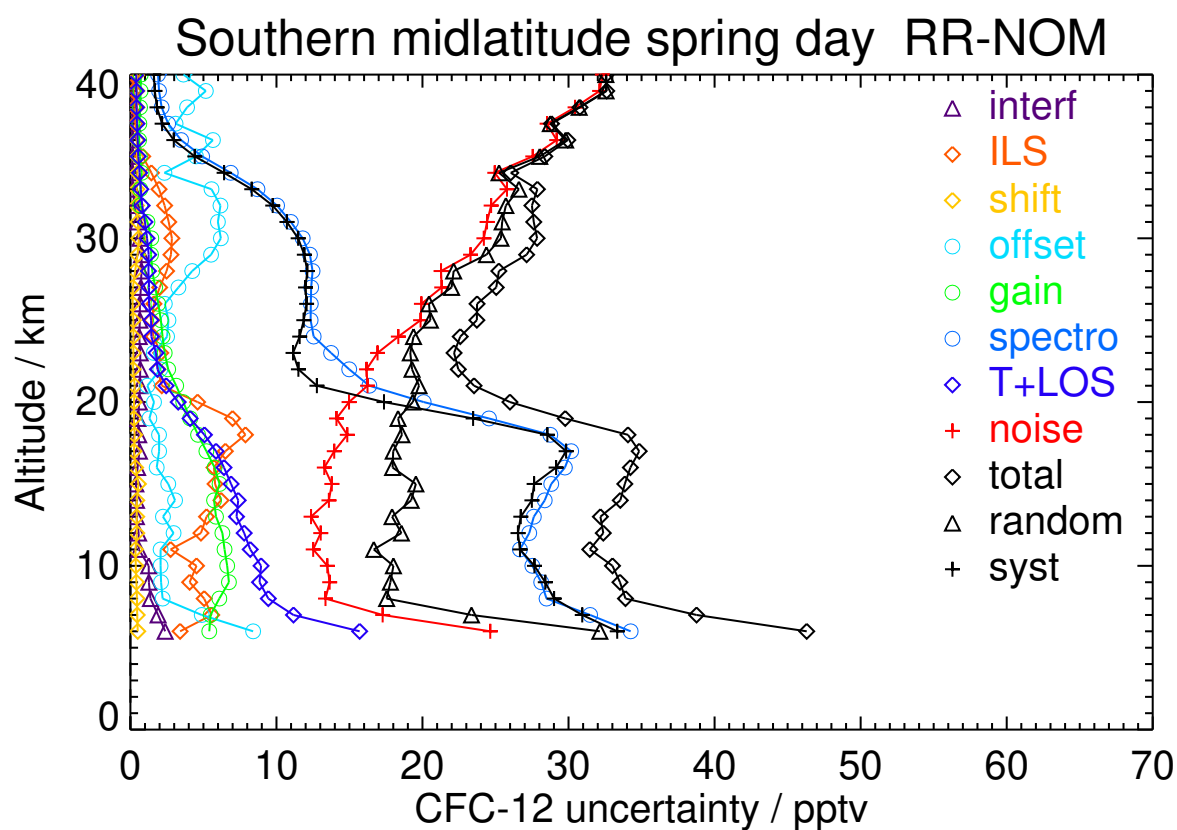

**Figure S55.** V8R\_F-12\_261 Southern midlatitude spring day

**Table S57.** CFC-12 error budget for Southern midlatitude spring night. All uncertainties are  $1\sigma$ .

| altitude<br>(km) | mean target<br>(pptv) | interf<br>(pptv) | ILS<br>(pptv) | shift<br>(pptv) | offset<br>(pptv) | gain<br>(pptv) | spectro<br>(pptv) | T+LOS<br>(pptv) | noise<br>(pptv) | random<br>(pptv) | syst<br>(pptv) | total<br>(pptv) |
|------------------|-----------------------|------------------|---------------|-----------------|------------------|----------------|-------------------|-----------------|-----------------|------------------|----------------|-----------------|
| 8                | 534.52                | 1.40             | 6.19          | 0.31            | 2.41             | 4.75           | 24.09             | 9.00            | 12.69           | 17.17            | 24.42          | 29.85           |
| 11               | 520.51                | 0.94             | 3.01          | 0.33            | 2.49             | 5.97           | 23.97             | 8.12            | 12.79           | 16.19            | 24.37          | 29.26           |
| 14               | 494.51                | 0.39             | 5.47          | 0.48            | 2.99             | 6.13           | 27.63             | 7.58            | 13.51           | 17.72            | 27.67          | 32.86           |
| 17               | 383.46                | 0.53             | 8.23          | 0.28            | 1.87             | 6.93           | 32.08             | 6.35            | 14.42           | 17.60            | 32.98          | 37.38           |
| 20               | 221.51                | 0.54             | 6.77          | 0.34            | 1.84             | 3.74           | 21.45             | 3.49            | 15.78           | 19.26            | 20.35          | 28.02           |
| 23               | 173.06                | 0.61             | 1.83          | 0.13            | 1.59             | 2.18           | 12.04             | 1.53            | 17.69           | 19.27            | 9.99           | 21.71           |
| 26               | 164.80                | 0.65             | 2.32          | 0.16            | 2.26             | 1.90           | 11.48             | 1.16            | 19.96           | 21.27            | 9.68           | 23.36           |
| 29               | 143.18                | 0.79             | 2.64          | 0.51            | 5.60             | 1.28           | 10.84             | 1.10            | 23.50           | 24.71            | 10.05          | 26.68           |
| 32               | 87.13                 | 0.30             | 2.31          | 0.41            | 5.52             | 0.69           | 9.13              | 0.81            | 24.12           | 25.13            | 8.41           | 26.50           |
| 35               | 21.83                 | 0.12             | 0.87          | 0.47            | 3.96             | 0.67           | 4.65              | 0.47            | 27.05           | 27.45            | 4.18           | 27.76           |
| 38               | -5.24                 | 0.18             | 0.22          | 0.44            | 3.57             | 0.66           | 1.94              | 0.42            | 30.20           | 30.44            | 1.66           | 30.49           |
| 41               | -12.28                | 0.21             | 0.19          | 0.47            | 3.69             | 0.74           | 1.29              | 0.39            | 33.62           | 33.84            | 1.26           | 33.86           |

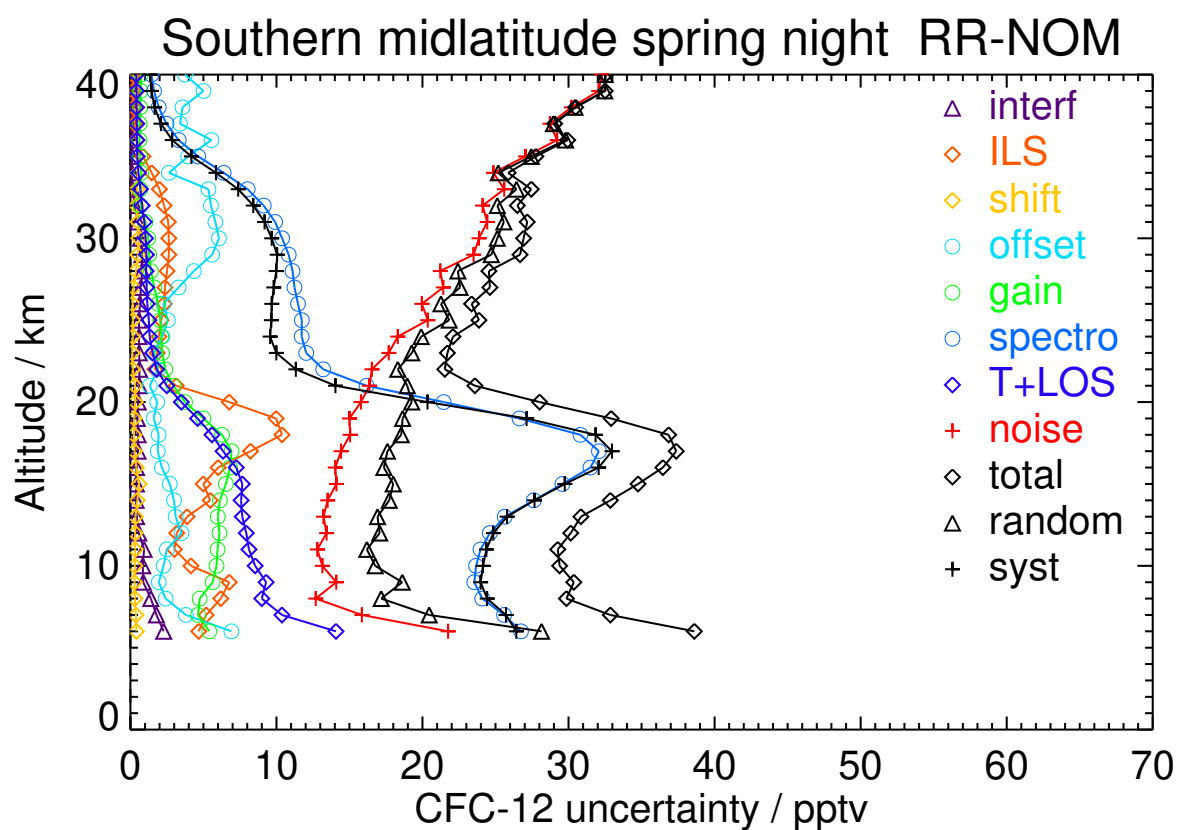

**Figure S56.** V8R\_F-12\_261 Southern midlatitude spring night

**Table S58.** CFC-12 error budget for Southern midlatitude summer day. All uncertainties are  $1\sigma$ .

| altitude<br>(km) | mean target<br>(pptv) | interf<br>(pptv) | ILS<br>(pptv) | shift<br>(pptv) | offset<br>(pptv) | gain<br>(pptv) | spectro<br>(pptv) | T+LOS<br>(pptv) | noise<br>(pptv) | random<br>(pptv) | syst<br>(pptv) | total<br>(pptv) |
|------------------|-----------------------|------------------|---------------|-----------------|------------------|----------------|-------------------|-----------------|-----------------|------------------|----------------|-----------------|
| 8                | 538.18                | 1.68             | 5.34          | 0.53            | 2.51             | 5.05           | 28.04             | 9.64            | 13.41           | 18.70            | 27.80          | 33.50           |
| 11               | 516.63                | 0.83             | 3.44          | 0.37            | 2.15             | 6.53           | 25.69             | 7.65            | 11.72           | 16.24            | 25.54          | 30.26           |
| 14               | 480.37                | 0.44             | 6.98          | 0.47            | 3.33             | 5.81           | 25.43             | 7.02            | 13.11           | 18.78            | 24.68          | 31.01           |
| 17               | 430.03                | 0.51             | 6.27          | 0.32            | 2.37             | 6.38           | 29.96             | 6.46            | 14.29           | 18.15            | 30.00          | 35.06           |
| 20               | 327.39                | 0.51             | 7.16          | 0.37            | 2.02             | 4.21           | 27.45             | 4.48            | 15.49           | 21.87            | 24.66          | 32.97           |
| 23               | 233.19                | 0.59             | 3.61          | 0.23            | 1.91             | 2.63           | 18.26             | 2.54            | 17.62           | 19.06            | 17.64          | 25.97           |
| 26               | 158.72                | 0.67             | 3.32          | 0.21            | 2.03             | 1.32           | 13.47             | 1.66            | 18.59           | 19.10            | 13.51          | 23.40           |
| 29               | 82.54                 | 0.84             | 2.79          | 0.49            | 5.07             | 0.37           | 8.15              | 1.06            | 22.66           | 23.49            | 8.01           | 24.82           |
| 32               | 46.52                 | 0.45             | 0.82          | 0.28            | 5.57             | 0.27           | 4.07              | 0.42            | 22.49           | 23.23            | 3.88           | 23.55           |
| 35               | 6.11                  | 0.18             | 0.34          | 0.45            | 3.85             | 0.67           | 2.49              | 0.42            | 24.49           | 24.85            | 2.09           | 24.94           |
| 38               | 1.40                  | 0.19             | 0.23          | 0.37            | 3.52             | 0.79           | 1.43              | 0.44            | 26.94           | 27.20            | 1.25           | 27.23           |
| 41               | 11.70                 | 0.21             | 0.12          | 0.43            | 3.47             | 0.93           | 1.88              | 0.39            | 30.08           | 30.29            | 1.91           | 30.35           |

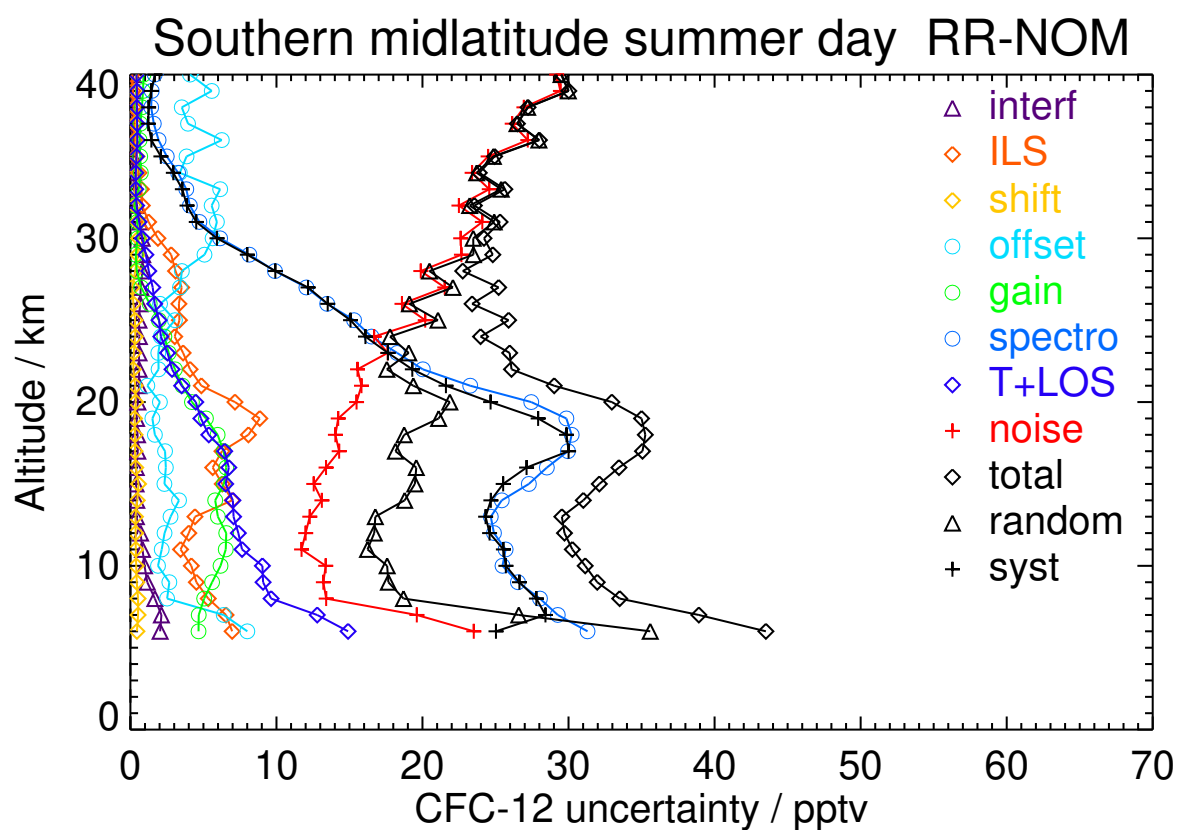

**Figure S57.** V8R\_F-12\_261 Southern midlatitude summer day

**Table S59.** CFC-12 error budget for Southern midlatitude summer night. All uncertainties are  $1\sigma$ .

| altitude<br>(km) | mean target<br>(pptv) | interf<br>(pptv) | ILS<br>(pptv) | shift<br>(pptv) | offset<br>(pptv) | gain<br>(pptv) | spectro<br>(pptv) | T+LOS<br>(pptv) | noise<br>(pptv) | random<br>(pptv) | syst<br>(pptv) | total<br>(pptv) |
|------------------|-----------------------|------------------|---------------|-----------------|------------------|----------------|-------------------|-----------------|-----------------|------------------|----------------|-----------------|
| 8                | 534.15                | 1.67             | 5.20          | 0.40            | 2.18             | 4.76           | 25.42             | 9.54            | 13.02           | 17.48            | 25.66          | 31.05           |
| 11               | 508.66                | 0.72             | 4.93          | 0.44            | 2.76             | 5.61           | 24.22             | 7.73            | 11.74           | 15.75            | 24.50          | 29.12           |
| 14               | 485.44                | 0.57             | 8.26          | 0.46            | 3.40             | 6.51           | 29.56             | 7.07            | 13.15           | 19.55            | 28.94          | 34.92           |
| 17               | 418.16                | 0.62             | 6.84          | 0.28            | 2.55             | 6.25           | 29.98             | 6.03            | 14.32           | 19.74            | 29.05          | 35.12           |
| 20               | 335.19                | 0.54             | 6.08          | 0.39            | 2.02             | 4.85           | 28.29             | 4.38            | 15.37           | 19.87            | 26.94          | 33.48           |
| 23               | 234.30                | 0.58             | 3.23          | 0.24            | 1.91             | 2.81           | 17.79             | 2.51            | 17.62           | 18.75            | 17.43          | 25.60           |
| 26               | 163.94                | 0.74             | 3.29          | 0.25            | 2.06             | 1.57           | 13.73             | 1.73            | 18.55           | 19.10            | 13.75          | 23.53           |
| 29               | 85.30                 | 0.88             | 3.09          | 0.53            | 5.18             | 0.49           | 8.42              | 1.08            | 22.42           | 23.25            | 8.49           | 24.75           |
| 32               | 37.28                 | 0.42             | 1.13          | 0.36            | 4.53             | 0.48           | 4.13              | 0.40            | 21.71           | 22.27            | 3.86           | 22.60           |
| 35               | 7.47                  | 0.17             | 0.34          | 0.43            | 3.07             | 0.62           | 2.00              | 0.44            | 23.94           | 24.19            | 1.54           | 24.24           |
| 38               | -0.21                 | 0.20             | 0.30          | 0.36            | 2.99             | 0.82           | 1.67              | 0.40            | 26.37           | 26.57            | 1.56           | 26.61           |
| 41               | -3.56                 | 0.22             | 0.14          | 0.44            | 3.05             | 0.96           | 1.93              | 0.38            | 29.27           | 29.45            | 1.89           | 29.51           |

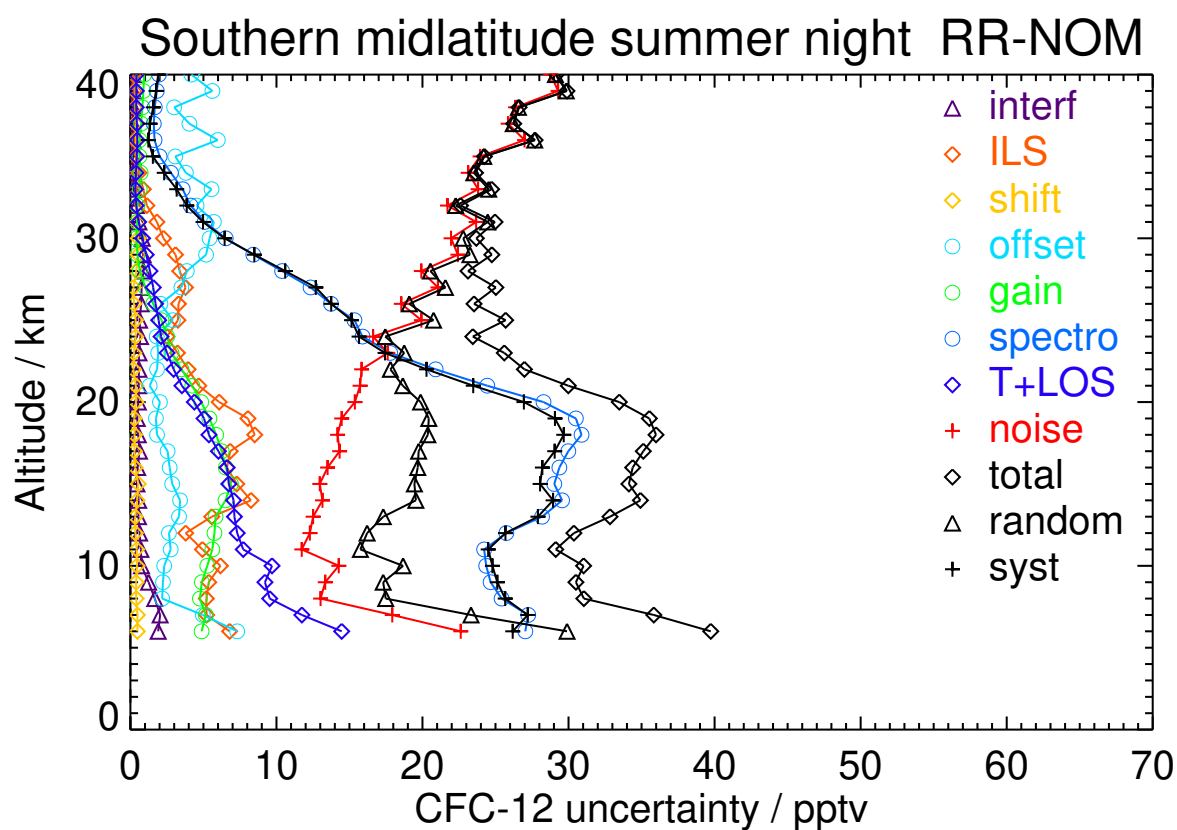

**Figure S58.** V8R\_F-12\_261 Southern midlatitude summer night

**Table S60.** CFC-12 error budget for Southern midlatitude autumn day. All uncertainties are  $1\sigma$ .

| altitude<br>(km) | mean target<br>(pptv) | interf<br>(pptv) | ILS<br>(pptv) | shift<br>(pptv) | offset<br>(pptv) | gain<br>(pptv) | spectro<br>(pptv) | T+LOS<br>(pptv) | noise<br>(pptv) | random<br>(pptv) | syst<br>(pptv) | total<br>(pptv) |
|------------------|-----------------------|------------------|---------------|-----------------|------------------|----------------|-------------------|-----------------|-----------------|------------------|----------------|-----------------|
| 8                | 528.29                | 1.42             | 4.43          | 0.46            | 2.25             | 5.50           | 27.55             | 9.32            | 12.53           | 16.64            | 27.98          | 32.56           |
| 11               | 510.37                | 0.83             | 3.40          | 0.40            | 1.93             | 5.70           | 24.25             | 7.56            | 11.87           | 15.48            | 24.40          | 28.89           |
| 14               | 502.47                | 0.31             | 4.67          | 0.54            | 2.56             | 6.68           | 27.46             | 7.01            | 12.87           | 16.36            | 27.83          | 32.28           |
| 17               | 424.48                | 0.45             | 6.24          | 0.28            | 1.73             | 6.51           | 29.74             | 5.87            | 13.85           | 16.23            | 30.53          | 34.57           |
| 20               | 318.58                | 0.41             | 4.80          | 0.36            | 1.60             | 4.46           | 26.08             | 3.89            | 15.67           | 17.22            | 26.28          | 31.42           |
| 23               | 196.62                | 0.44             | 3.10          | 0.14            | 1.53             | 2.58           | 18.35             | 2.46            | 17.42           | 18.22            | 18.24          | 25.79           |
| 26               | 126.86                | 0.47             | 2.47          | 0.12            | 2.65             | 1.25           | 11.62             | 1.36            | 21.46           | 21.95            | 11.43          | 24.75           |
| 29               | 67.19                 | 0.55             | 2.06          | 0.41            | 6.08             | 0.73           | 7.79              | 0.93            | 24.49           | 25.49            | 7.34           | 26.53           |
| 32               | 29.65                 | 0.21             | 0.94          | 0.18            | 6.58             | 0.21           | 3.91              | 0.35            | 27.36           | 28.20            | 3.63           | 28.43           |
| 35               | 1.54                  | 0.11             | 0.38          | 0.38            | 4.61             | 0.43           | 2.13              | 0.40            | 30.24           | 30.63            | 1.57           | 30.67           |
| 38               | -8.14                 | 0.15             | 0.24          | 0.42            | 4.25             | 0.45           | 1.63              | 0.39            | 33.87           | 34.17            | 1.13           | 34.19           |
| 41               | -1.41                 | 0.18             | 0.18          | 0.45            | 5.20             | 0.54           | 1.43              | 0.43            | 37.43           | 37.81            | 1.07           | 37.82           |

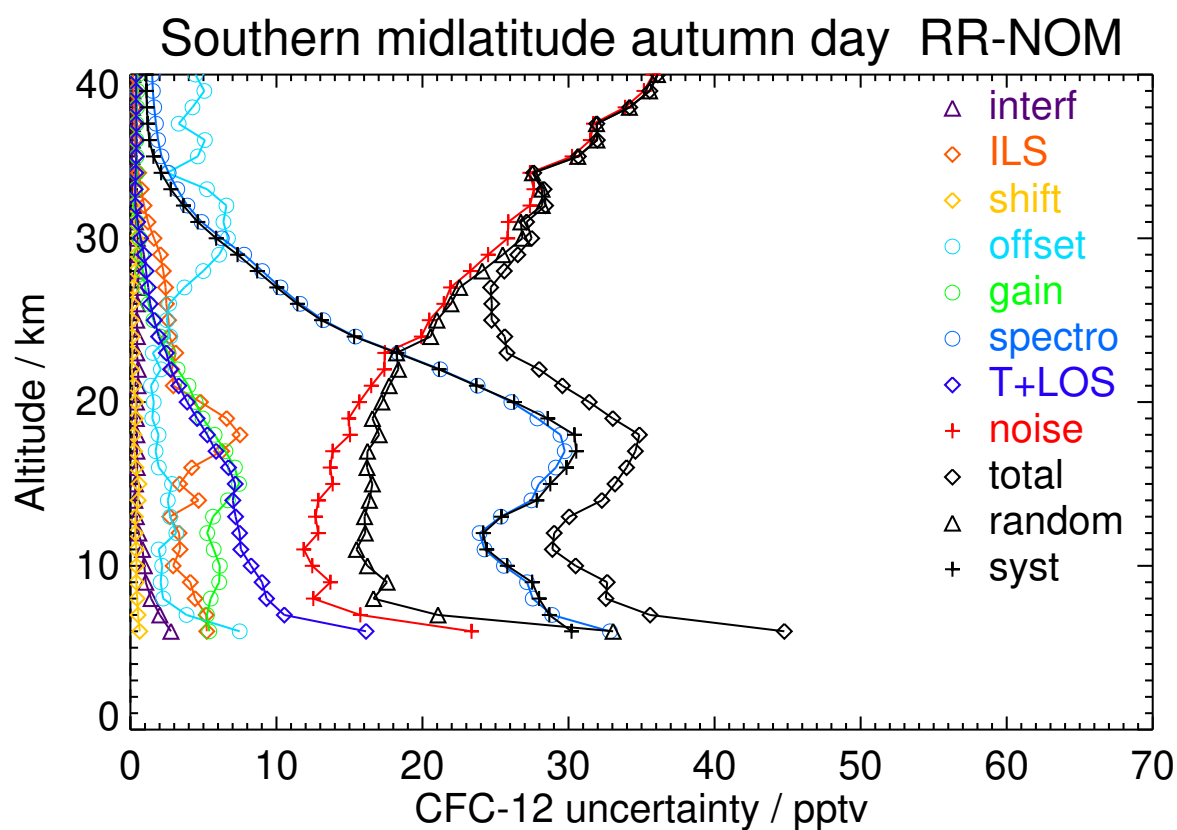

**Figure S59.** V8R\_F-12\_261 Southern midlatitude autumn day

**Table S61.** CFC-12 error budget for Southern midlatitude autumn night. All uncertainties are  $1\sigma$ .

| altitude<br>(km) | mean target<br>(pptv) | interf<br>(pptv) | ILS<br>(pptv) | shift<br>(pptv) | offset<br>(pptv) | gain<br>(pptv) | spectro<br>(pptv) | T+LOS<br>(pptv) | noise<br>(pptv) | random<br>(pptv) | syst<br>(pptv) | total<br>(pptv) |
|------------------|-----------------------|------------------|---------------|-----------------|------------------|----------------|-------------------|-----------------|-----------------|------------------|----------------|-----------------|
| 8                | 525.47                | 1.72             | 6.84          | 0.35            | 2.29             | 4.72           | 23.87             | 9.32            | 13.23           | 18.24            | 24.02          | 30.15           |
| 11               | 519.02                | 0.96             | 4.36          | 0.28            | 2.62             | 5.47           | 23.67             | 7.85            | 12.41           | 15.71            | 24.20          | 28.85           |
| 14               | 504.55                | 0.42             | 5.54          | 0.55            | 3.37             | 6.47           | 28.09             | 7.31            | 13.68           | 17.22            | 28.59          | 33.38           |
| 17               | 437.92                | 0.47             | 6.32          | 0.27            | 2.36             | 6.81           | 32.00             | 6.21            | 14.62           | 17.23            | 32.74          | 36.99           |
| 20               | 326.66                | 0.40             | 6.02          | 0.46            | 1.95             | 4.65           | 26.49             | 4.29            | 16.15           | 17.89            | 26.88          | 32.29           |
| 23               | 206.00                | 0.49             | 2.93          | 0.21            | 1.79             | 2.55           | 19.09             | 2.55            | 18.63           | 19.57            | 18.79          | 27.13           |
| 26               | 126.04                | 0.54             | 2.31          | 0.14            | 2.32             | 1.39           | 12.23             | 1.42            | 20.27           | 21.00            | 11.59          | 23.98           |
| 29               | 63.73                 | 0.64             | 1.87          | 0.40            | 6.09             | 0.73           | 7.54              | 0.87            | 25.13           | 26.21            | 6.64           | 27.03           |
| 32               | 31.39                 | 0.30             | 1.01          | 0.23            | 5.29             | 0.36           | 4.31              | 0.42            | 25.41           | 26.14            | 3.17           | 26.34           |
| 35               | 4.60                  | 0.13             | 0.58          | 0.40            | 2.95             | 0.44           | 2.60              | 0.42            | 28.09           | 28.34            | 1.57           | 28.38           |
| 38               | -3.51                 | 0.18             | 0.22          | 0.41            | 3.20             | 0.58           | 1.72              | 0.42            | 31.87           | 32.07            | 1.21           | 32.09           |
| 41               | -11.69                | 0.22             | 0.22          | 0.47            | 4.35             | 0.63           | 1.43              | 0.40            | 35.70           | 35.98            | 1.17           | 36.00           |

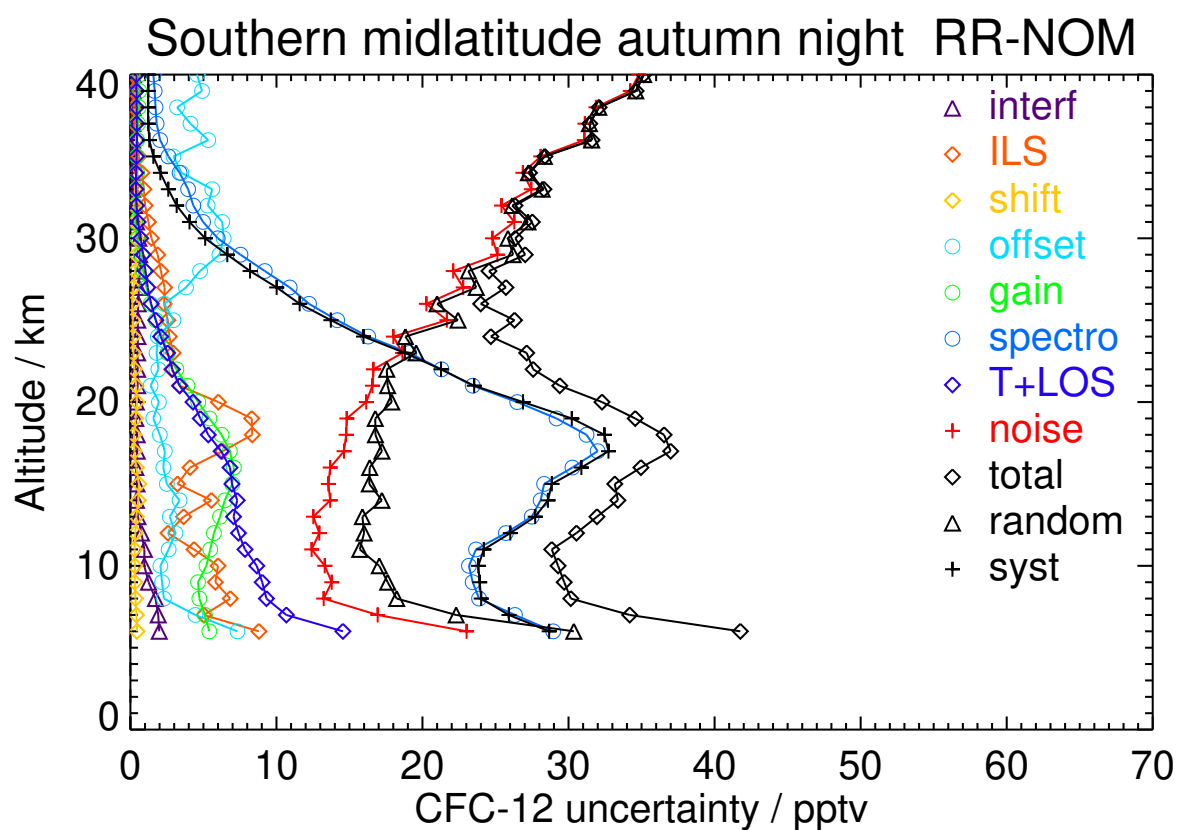

**Figure S60.** V8R\_F-12\_261 Southern midlatitude autumn night

**Table S62.** CFC-12 error budget for Southern polar winter day. All uncertainties are  $1\sigma$ .

| altitude<br>(km) | mean target<br>(pptv) | interf<br>(pptv) | ILS<br>(pptv) | shift<br>(pptv) | offset<br>(pptv) | gain<br>(pptv) | spectro<br>(pptv) | T+LOS<br>(pptv) | noise<br>(pptv) | random<br>(pptv) | syst<br>(pptv) | total<br>(pptv) |
|------------------|-----------------------|------------------|---------------|-----------------|------------------|----------------|-------------------|-----------------|-----------------|------------------|----------------|-----------------|
| 5                | 555.51                | 3.04             | 5.84          | 0.85            | 8.88             | 5.07           | 40.44             | 18.11           | 25.51           | 38.70            | 35.58          | 52.57           |
| 8                | 540.74                | 0.88             | 5.67          | 0.28            | 2.65             | 7.47           | 26.59             | 8.71            | 13.57           | 18.24            | 27.02          | 32.60           |
| 11               | 525.79                | 0.46             | 2.33          | 0.56            | 3.12             | 6.50           | 27.20             | 8.83            | 13.96           | 18.48            | 27.00          | 32.72           |
| 14               | 436.70                | 0.30             | 6.10          | 0.66            | 2.54             | 7.33           | 34.08             | 8.87            | 15.02           | 19.32            | 34.50          | 39.54           |
| 17               | 265.64                | 0.41             | 7.30          | 0.33            | 1.77             | 4.31           | 29.16             | 5.57            | 16.64           | 18.66            | 29.75          | 35.12           |
| 20               | 131.57                | 0.33             | 4.68          | 0.50            | 1.71             | 2.11           | 17.92             | 3.08            | 19.72           | 20.94            | 17.63          | 27.37           |
| 23               | 53.25                 | 0.26             | 3.24          | 0.15            | 2.33             | 0.89           | 10.00             | 1.67            | 22.06           | 22.81            | 9.25           | 24.62           |
| 26               | 12.76                 | 0.40             | 1.59          | 0.15            | 5.34             | 0.40           | 4.48              | 0.76            | 27.48           | 28.22            | 3.21           | 28.41           |
| 29               | 6.17                  | 0.73             | 1.96          | 0.25            | 9.52             | 0.53           | 3.17              | 1.15            | 29.87           | 31.56            | 1.70           | 31.61           |
| 32               | 8.67                  | 0.45             | 1.43          | 0.18            | 7.99             | 0.42           | 2.37              | 1.00            | 33.32           | 34.35            | 1.74           | 34.40           |
| 35               | 9.87                  | 0.38             | 1.19          | 0.36            | 5.81             | 0.38           | 2.08              | 0.98            | 35.45           | 35.99            | 1.61           | 36.03           |
| 38               | -0.01                 | 0.37             | 1.04          | 0.42            | 5.97             | 0.36           | 1.90              | 0.90            | 38.44           | 38.95            | 1.41           | 38.98           |
| 41               | 7.73                  | 0.31             | 0.86          | 0.43            | 7.09             | 0.34           | 1.66              | 0.78            | 41.01           | 41.65            | 1.29           | 41.67           |

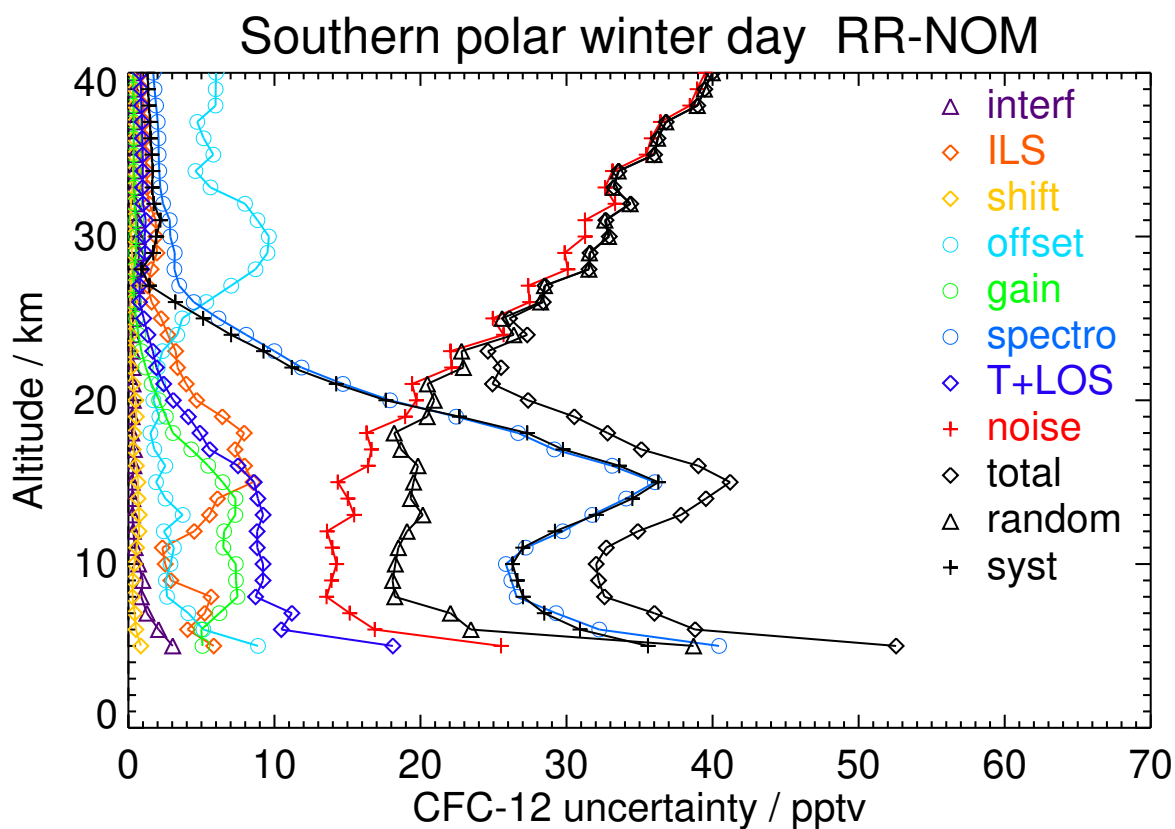

**Figure S61.** V8R\_F-12\_261 Southern polar winter day

**Table S63.** CFC-12 error budget for Southern polar winter night. All uncertainties are  $1\sigma$ .

| altitude<br>(km) | mean target<br>(pptv) | interf<br>(pptv) | ILS<br>(pptv) | shift<br>(pptv) | offset<br>(pptv) | gain<br>(pptv) | spectro<br>(pptv) | T+LOS<br>(pptv) | noise<br>(pptv) | random<br>(pptv) | syst<br>(pptv) | total<br>(pptv) |
|------------------|-----------------------|------------------|---------------|-----------------|------------------|----------------|-------------------|-----------------|-----------------|------------------|----------------|-----------------|
| 5                | 535.75                | 2.89             | 2.32          | 0.70            | 9.05             | 4.43           | 32.00             | 17.99           | 25.13           | 33.17            | 31.53          | 45.77           |
| 8                | 523.11                | 0.88             | 8.12          | 0.24            | 2.59             | 6.18           | 19.04             | 9.20            | 13.99           | 18.10            | 20.66          | 27.47           |
| 11               | 527.07                | 0.75             | 2.33          | 0.46            | 3.18             | 6.48           | 23.32             | 8.74            | 14.01           | 17.85            | 23.58          | 29.58           |
| 14               | 454.30                | 0.20             | 6.63          | 0.65            | 2.07             | 7.55           | 28.29             | 8.46            | 14.43           | 18.74            | 28.89          | 34.44           |
| 17               | 294.90                | 0.29             | 8.43          | 0.53            | 1.43             | 4.72           | 28.09             | 5.92            | 15.73           | 17.70            | 29.22          | 34.17           |
| 20               | 149.66                | 0.34             | 6.22          | 0.38            | 1.55             | 2.25           | 19.82             | 3.29            | 18.49           | 19.77            | 20.02          | 28.14           |
| 23               | 52.46                 | 0.34             | 3.32          | 0.23            | 2.06             | 0.66           | 9.78              | 1.66            | 21.40           | 21.92            | 9.57           | 23.92           |
| 26               | 21.56                 | 0.39             | 1.75          | 0.15            | 4.88             | 0.43           | 4.93              | 0.71            | 27.28           | 27.99            | 3.62           | 28.22           |
| 29               | -0.28                 | 0.60             | 1.39          | 0.31            | 9.38             | 0.25           | 3.18              | 0.78            | 30.16           | 31.78            | 0.88           | 31.80           |
| 32               | -1.70                 | 0.34             | 1.11          | 0.11            | 8.71             | 0.24           | 2.39              | 0.66            | 33.39           | 34.61            | 0.64           | 34.61           |
| 35               | -6.35                 | 0.23             | 0.86          | 0.35            | 5.37             | 0.33           | 1.98              | 0.66            | 35.02           | 35.50            | 0.61           | 35.51           |
| 38               | -9.21                 | 0.23             | 0.85          | 0.42            | 5.52             | 0.41           | 1.80              | 0.66            | 37.97           | 38.42            | 0.85           | 38.43           |
| 41               | -6.80                 | 0.23             | 0.89          | 0.43            | 7.21             | 0.47           | 1.87              | 0.67            | 40.66           | 41.34            | 1.14           | 41.35           |

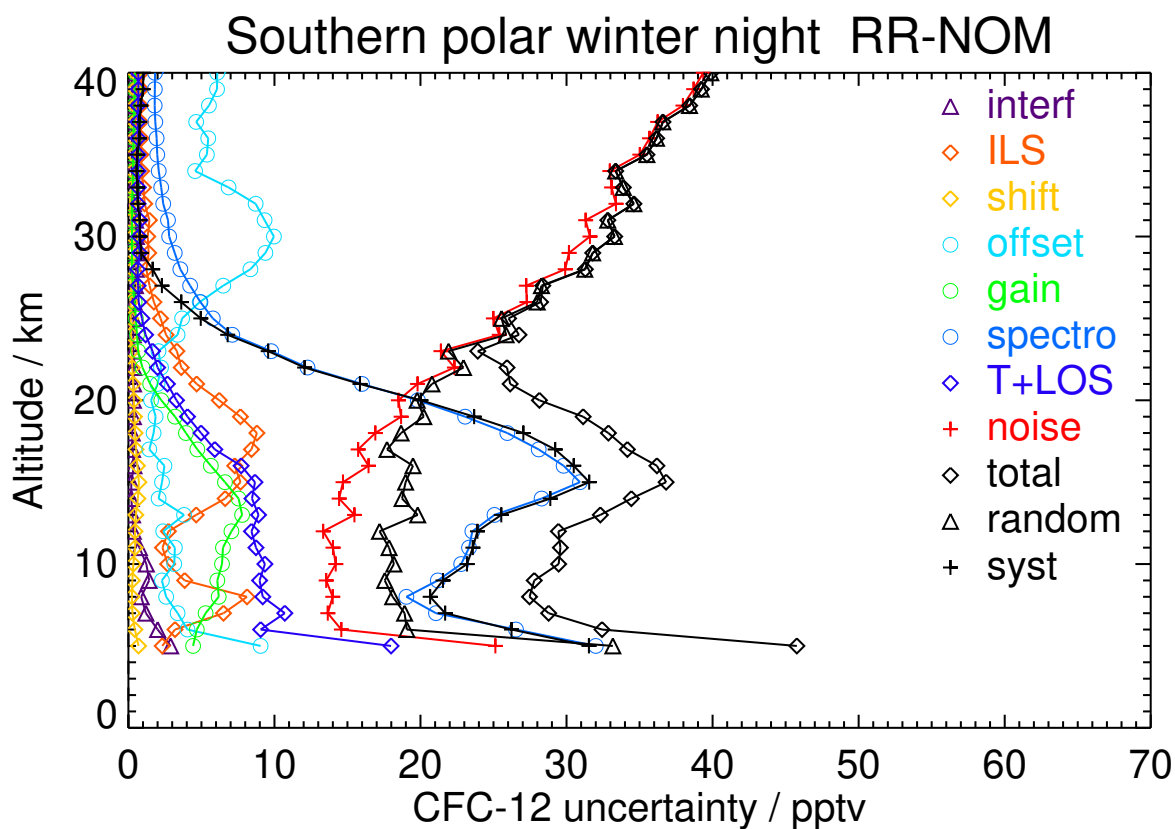

**Figure S62.** V8R\_F-12\_261 Southern polar winter night

**Table S64.** CFC-12 error budget for Southern polar spring day. All uncertainties are  $1\sigma$ .

| altitude<br>(km) | mean target<br>(pptv) | interf<br>(pptv) | ILS<br>(pptv) | shift<br>(pptv) | offset<br>(pptv) | gain<br>(pptv) | spectro<br>(pptv) | T+LOS<br>(pptv) | noise<br>(pptv) | random<br>(pptv) | syst<br>(pptv) | total<br>(pptv) |
|------------------|-----------------------|------------------|---------------|-----------------|------------------|----------------|-------------------|-----------------|-----------------|------------------|----------------|-----------------|
| 5                | 525.53                | 2.65             | 5.64          | 0.46            | 8.09             | 4.69           | 31.81             | 15.97           | 23.75           | 32.08            | 30.47          | 44.25           |
| 8                | 539.77                | 1.26             | 7.77          | 0.37            | 2.41             | 8.37           | 25.96             | 9.48            | 14.50           | 21.11            | 25.82          | 33.35           |
| 11               | 512.68                | 0.61             | 4.98          | 0.47            | 3.39             | 7.71           | 34.04             | 9.73            | 14.42           | 20.80            | 33.54          | 39.47           |
| 14               | 376.37                | 0.37             | 10.00         | 0.36            | 2.58             | 5.20           | 30.30             | 8.07            | 14.49           | 21.84            | 29.15          | 36.43           |
| 17               | 247.91                | 0.54             | 10.22         | 0.44            | 2.07             | 3.64           | 27.36             | 5.05            | 15.18           | 21.89            | 25.46          | 33.57           |
| 20               | 142.62                | 0.53             | 4.59          | 0.22            | 1.15             | 2.47           | 12.91             | 2.29            | 16.74           | 19.41            | 10.21          | 21.93           |
| 23               | 118.39                | 0.81             | 2.08          | 0.24            | 2.11             | 1.82           | 11.54             | 1.45            | 16.80           | 19.44            | 7.25           | 20.74           |
| 26               | 107.57                | 0.83             | 1.50          | 0.24            | 3.35             | 1.13           | 8.75              | 1.06            | 22.02           | 23.37            | 5.65           | 24.04           |
| 29               | 92.02                 | 1.08             | 2.25          | 0.63            | 5.80             | 1.25           | 8.60              | 1.03            | 22.05           | 23.81            | 6.00           | 24.55           |
| 32               | 48.76                 | 0.23             | 1.77          | 0.43            | 6.09             | 0.67           | 6.35              | 0.63            | 23.92           | 25.09            | 4.96           | 25.57           |
| 35               | 14.63                 | 0.17             | 0.82          | 0.46            | 6.45             | 0.69           | 3.42              | 0.50            | 27.40           | 28.27            | 2.55           | 28.39           |
| 38               | 0.92                  | 0.20             | 0.32          | 0.39            | 5.78             | 0.64           | 1.67              | 0.42            | 29.98           | 30.56            | 1.41           | 30.59           |
| 41               | -9.46                 | 0.18             | 0.16          | 0.47            | 5.00             | 0.62           | 1.33              | 0.42            | 33.42           | 33.81            | 1.16           | 33.83           |

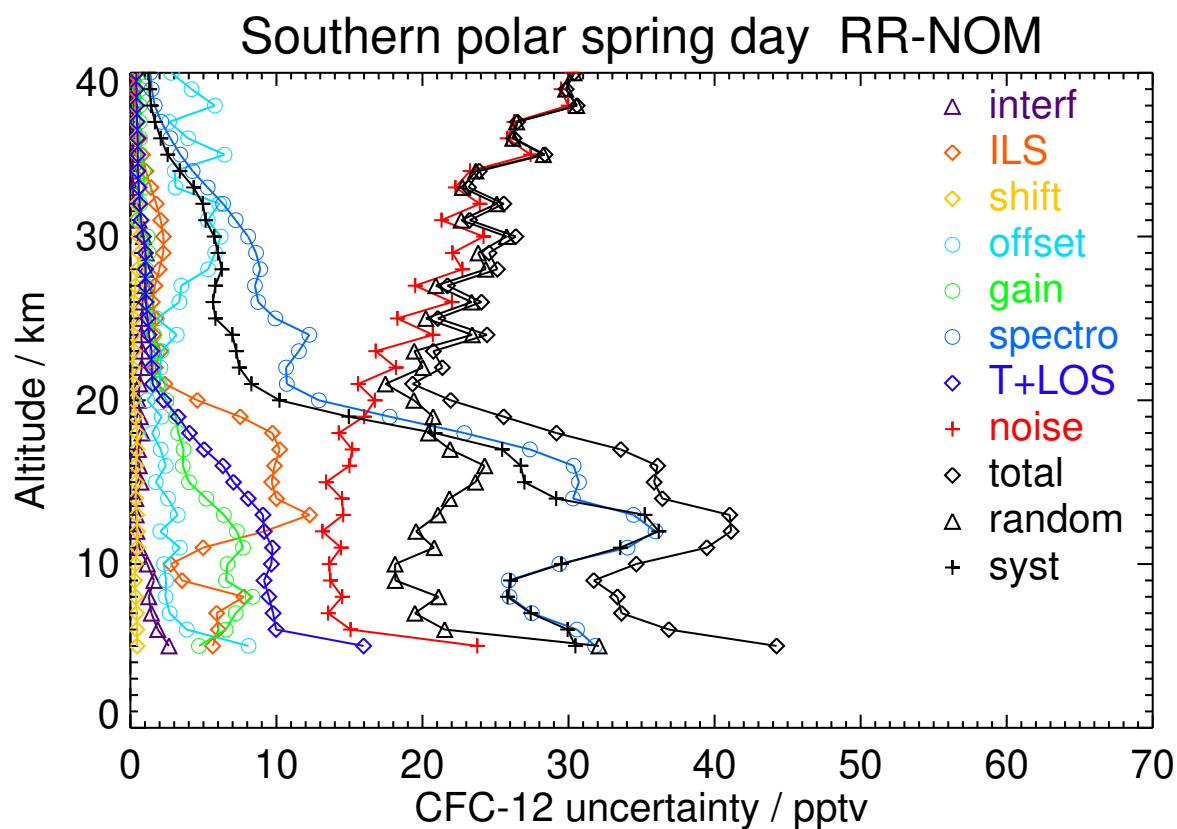

**Figure S63.** V8R\_F-12\_261 Southern polar spring day

**Table S65.** CFC-12 error budget for Southern polar spring night. All uncertainties are  $1\sigma$ .

| altitude<br>(km) | mean target<br>(pptv) | interf<br>(pptv) | ILS<br>(pptv) | shift<br>(pptv) | offset<br>(pptv) | gain<br>(pptv) | spectro<br>(pptv) | T+LOS<br>(pptv) | noise<br>(pptv) | random<br>(pptv) | syst<br>(pptv) | total<br>(pptv) |
|------------------|-----------------------|------------------|---------------|-----------------|------------------|----------------|-------------------|-----------------|-----------------|------------------|----------------|-----------------|
| 5                | 529.76                | 2.69             | 6.19          | 0.37            | 7.65             | 4.53           | 26.28             | 15.60           | 23.25           | 30.94            | 25.33          | 39.99           |
| 8                | 545.63                | 1.31             | 6.72          | 0.34            | 2.03             | 6.62           | 21.55             | 9.92            | 15.20           | 20.55            | 21.60          | 29.81           |
| 11               | 501.60                | 0.58             | 3.11          | 0.37            | 3.76             | 6.90           | 27.01             | 8.89            | 14.10           | 18.78            | 26.95          | 32.85           |
| 14               | 393.10                | 0.34             | 10.75         | 0.40            | 2.93             | 5.82           | 30.42             | 7.83            | 14.21           | 19.49            | 31.10          | 36.70           |
| 17               | 253.56                | 0.59             | 8.44          | 0.32            | 2.37             | 3.99           | 23.02             | 4.73            | 14.93           | 19.56            | 22.04          | 29.47           |
| 20               | 170.80                | 0.62             | 4.86          | 0.22            | 1.06             | 2.42           | 15.59             | 2.46            | 16.52           | 19.79            | 12.70          | 23.52           |
| 23               | 133.26                | 0.69             | 2.30          | 0.18            | 2.11             | 1.96           | 10.59             | 1.35            | 16.52           | 18.61            | 7.39           | 20.02           |
| 26               | 137.92                | 0.77             | 1.33          | 0.20            | 3.42             | 1.15           | 8.68              | 1.01            | 21.86           | 22.84            | 6.92           | 23.86           |
| 29               | 110.36                | 0.98             | 2.57          | 0.59            | 5.56             | 1.35           | 9.68              | 1.04            | 21.81           | 23.44            | 7.84           | 24.72           |
| 32               | 55.50                 | 0.21             | 2.26          | 0.45            | 6.06             | 0.69           | 6.73              | 0.76            | 24.15           | 25.30            | 5.64           | 25.92           |
| 35               | 17.99                 | 0.16             | 0.82          | 0.44            | 6.41             | 0.76           | 3.43              | 0.52            | 27.44           | 28.30            | 2.60           | 28.42           |
| 38               | -1.41                 | 0.19             | 0.33          | 0.43            | 5.74             | 0.74           | 1.85              | 0.42            | 30.11           | 30.69            | 1.51           | 30.72           |
| 41               | -1.39                 | 0.19             | 0.16          | 0.48            | 4.88             | 0.75           | 1.41              | 0.43            | 33.41           | 33.78            | 1.27           | 33.81           |

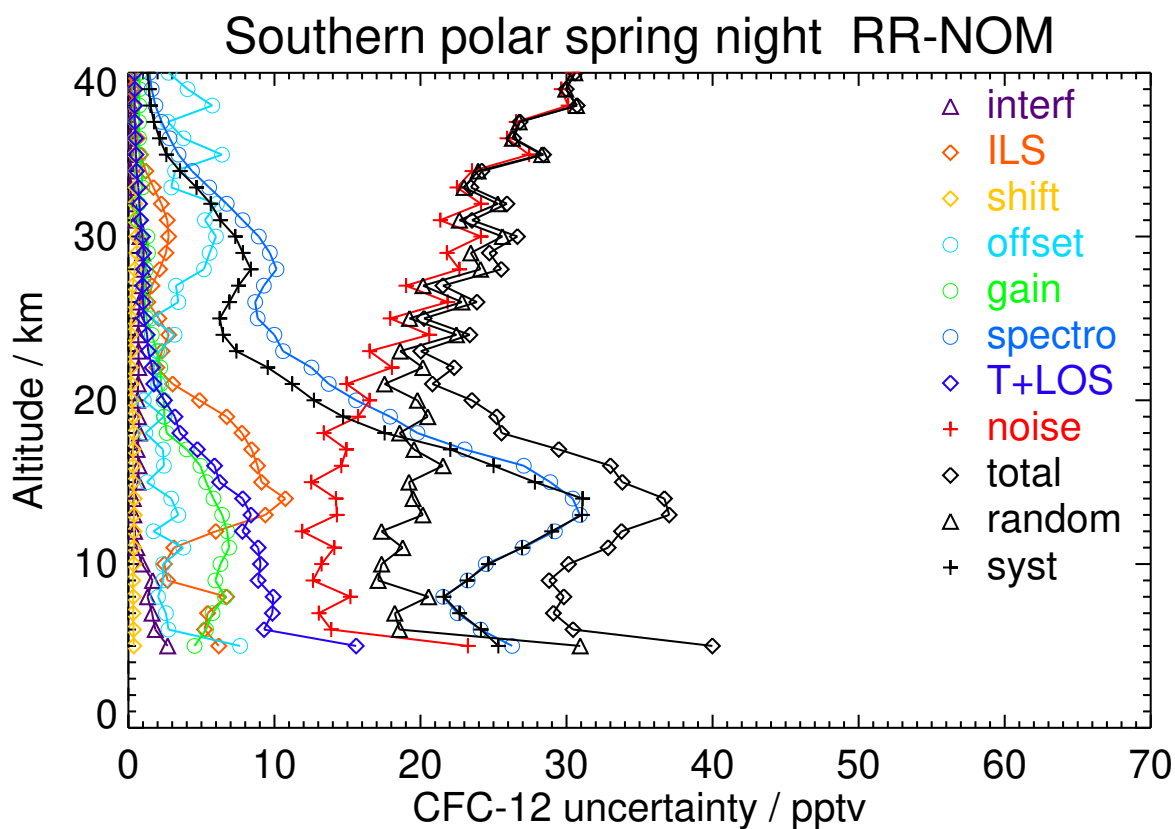

**Figure S64.** V8R\_F-12\_261 Southern polar spring night

**Table S66.** CFC-12 error budget for Southern polar summer day. All uncertainties are  $1\sigma$ .

| altitude<br>(km) | mean target<br>(pptv) | interf<br>(pptv) | ILS<br>(pptv) | shift<br>(pptv) | offset<br>(pptv) | gain<br>(pptv) | spectro<br>(pptv) | T+LOS<br>(pptv) | noise<br>(pptv) | random<br>(pptv) | syst<br>(pptv) | total<br>(pptv) |
|------------------|-----------------------|------------------|---------------|-----------------|------------------|----------------|-------------------|-----------------|-----------------|------------------|----------------|-----------------|
| 5                | 535.88                | 2.18             | 6.59          | 0.53            | 7.49             | 6.05           | 31.39             | 16.39           | 24.02           | 31.26            | 31.53          | 44.41           |
| 8                | 545.31                | 2.57             | 4.34          | 0.64            | 2.34             | 5.27           | 27.79             | 9.19            | 13.96           | 18.87            | 27.47          | 33.32           |
| 11               | 479.49                | 0.91             | 4.40          | 0.47            | 3.41             | 6.15           | 24.99             | 7.11            | 12.40           | 16.44            | 25.07          | 29.98           |
| 14               | 459.56                | 0.60             | 3.89          | 0.61            | 2.93             | 5.83           | 24.76             | 6.14            | 12.39           | 15.50            | 24.95          | 29.37           |
| 17               | 383.78                | 0.72             | 7.23          | 0.59            | 2.30             | 5.50           | 27.97             | 5.17            | 13.49           | 15.33            | 29.07          | 32.86           |
| 20               | 277.24                | 0.69             | 2.51          | 0.44            | 0.87             | 4.10           | 21.38             | 3.29            | 15.12           | 16.40            | 21.26          | 26.85           |
| 23               | 195.48                | 0.66             | 1.81          | 0.22            | 1.85             | 2.62           | 14.62             | 1.74            | 14.34           | 15.00            | 14.54          | 20.89           |
| 26               | 115.36                | 0.66             | 2.44          | 0.35            | 3.81             | 1.41           | 10.30             | 1.33            | 21.28           | 21.80            | 10.41          | 24.16           |
| 29               | 70.49                 | 0.90             | 1.73          | 0.45            | 5.22             | 0.47           | 6.44              | 0.79            | 20.44           | 21.20            | 6.46           | 22.16           |
| 32               | 25.73                 | 0.21             | 1.22          | 0.26            | 6.42             | 0.40           | 3.57              | 0.36            | 23.39           | 24.34            | 3.22           | 24.55           |
| 35               | 8.27                  | 0.14             | 0.44          | 0.36            | 6.84             | 0.50           | 1.72              | 0.42            | 26.61           | 27.52            | 1.03           | 27.54           |
| 38               | -3.12                 | 0.17             | 0.15          | 0.34            | 6.16             | 0.59           | 1.56              | 0.35            | 28.98           | 29.65            | 1.28           | 29.68           |
| 41               | -15.52                | 0.20             | 0.16          | 0.41            | 5.27             | 0.75           | 1.43              | 0.37            | 31.52           | 31.97            | 1.44           | 32.00           |

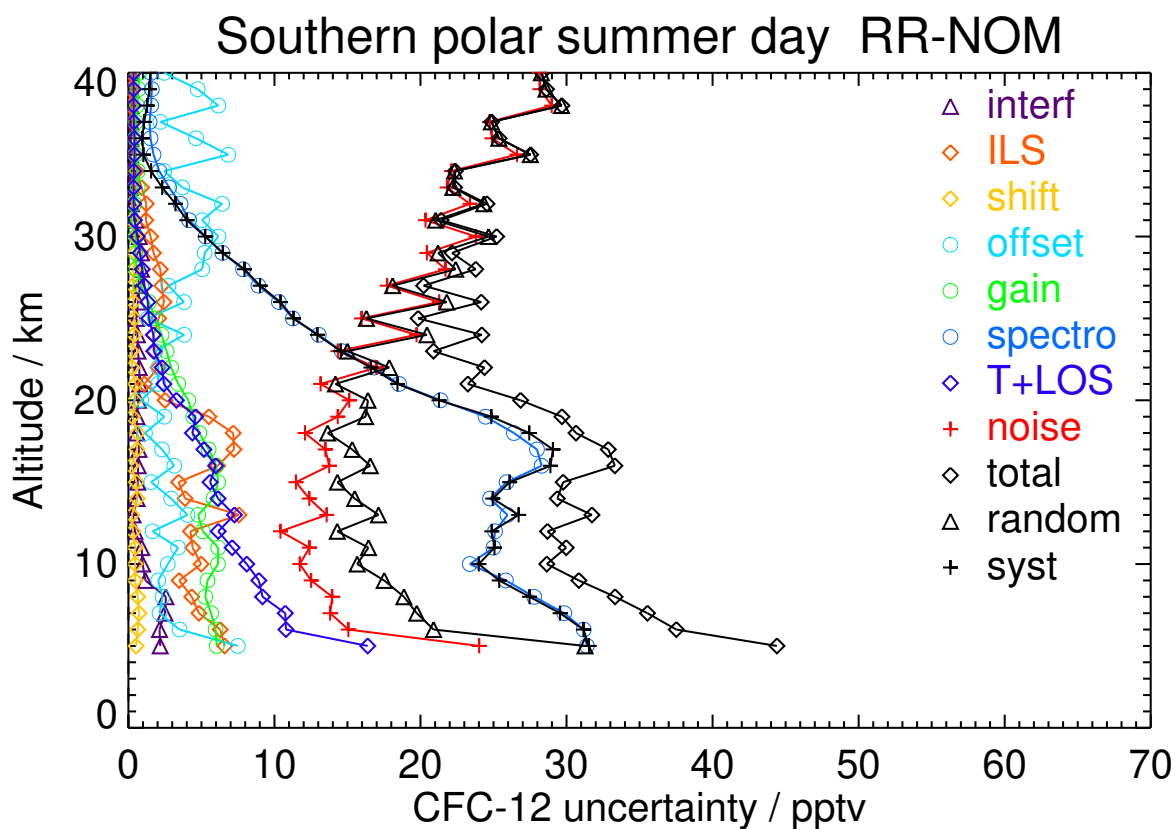

**Figure S65.** V8R\_F-12\_261 Southern polar summer day

**Table S67.** CFC-12 error budget for Southern polar summer night. All uncertainties are  $1\sigma$ .

| altitude<br>(km) | mean target<br>(pptv) | interf<br>(pptv) | ILS<br>(pptv) | shift<br>(pptv) | offset<br>(pptv) | gain<br>(pptv) | spectro<br>(pptv) | T+LOS<br>(pptv) | noise<br>(pptv) | random<br>(pptv) | syst<br>(pptv) | total<br>(pptv) |
|------------------|-----------------------|------------------|---------------|-----------------|------------------|----------------|-------------------|-----------------|-----------------|------------------|----------------|-----------------|
| 5                | 526.02                | 1.72             | 6.27          | 0.65            | 7.65             | 5.28           | 26.49             | 14.83           | 23.25           | 29.22            | 27.16          | 39.89           |
| 8                | 543.33                | 2.89             | 4.28          | 0.55            | 2.33             | 4.89           | 27.35             | 8.16            | 12.89           | 17.22            | 27.21          | 32.20           |
| 11               | 480.39                | 0.97             | 5.70          | 0.39            | 2.31             | 6.00           | 23.96             | 6.41            | 11.00           | 15.36            | 23.99          | 28.48           |
| 14               | 469.59                | 0.56             | 4.19          | 0.54            | 1.49             | 5.44           | 26.33             | 5.76            | 11.20           | 14.85            | 26.10          | 30.03           |
| 17               | 390.46                | 0.64             | 6.47          | 0.35            | 1.20             | 5.74           | 28.60             | 4.79            | 12.22           | 14.24            | 29.40          | 32.67           |
| 20               | 291.22                | 0.60             | 3.12          | 0.33            | 1.22             | 4.46           | 21.78             | 3.25            | 14.07           | 15.42            | 21.83          | 26.73           |
| 23               | 199.51                | 0.60             | 2.64          | 0.13            | 1.18             | 2.94           | 16.64             | 2.04            | 14.45           | 15.26            | 16.57          | 22.52           |
| 26               | 102.92                | 0.62             | 3.47          | 0.15            | 3.13             | 1.67           | 10.97             | 1.36            | 20.87           | 21.39            | 11.19          | 24.14           |
| 29               | 57.10                 | 0.87             | 1.34          | 0.45            | 5.32             | 0.37           | 5.17              | 0.73            | 21.13           | 21.91            | 5.01           | 22.47           |
| 32               | 29.11                 | 0.26             | 0.82          | 0.18            | 6.43             | 0.29           | 3.53              | 0.34            | 23.64           | 24.58            | 3.08           | 24.77           |
| 35               | -4.94                 | 0.14             | 0.24          | 0.38            | 6.11             | 0.49           | 1.42              | 0.38            | 26.63           | 27.35            | 1.11           | 27.37           |
| 38               | -3.39                 | 0.18             | 0.16          | 0.39            | 5.37             | 0.62           | 1.36              | 0.35            | 29.03           | 29.55            | 1.10           | 29.57           |
| 41               | -13.07                | 0.20             | 0.06          | 0.41            | 4.59             | 0.73           | 1.50              | 0.38            | 31.95           | 32.30            | 1.46           | 32.33           |

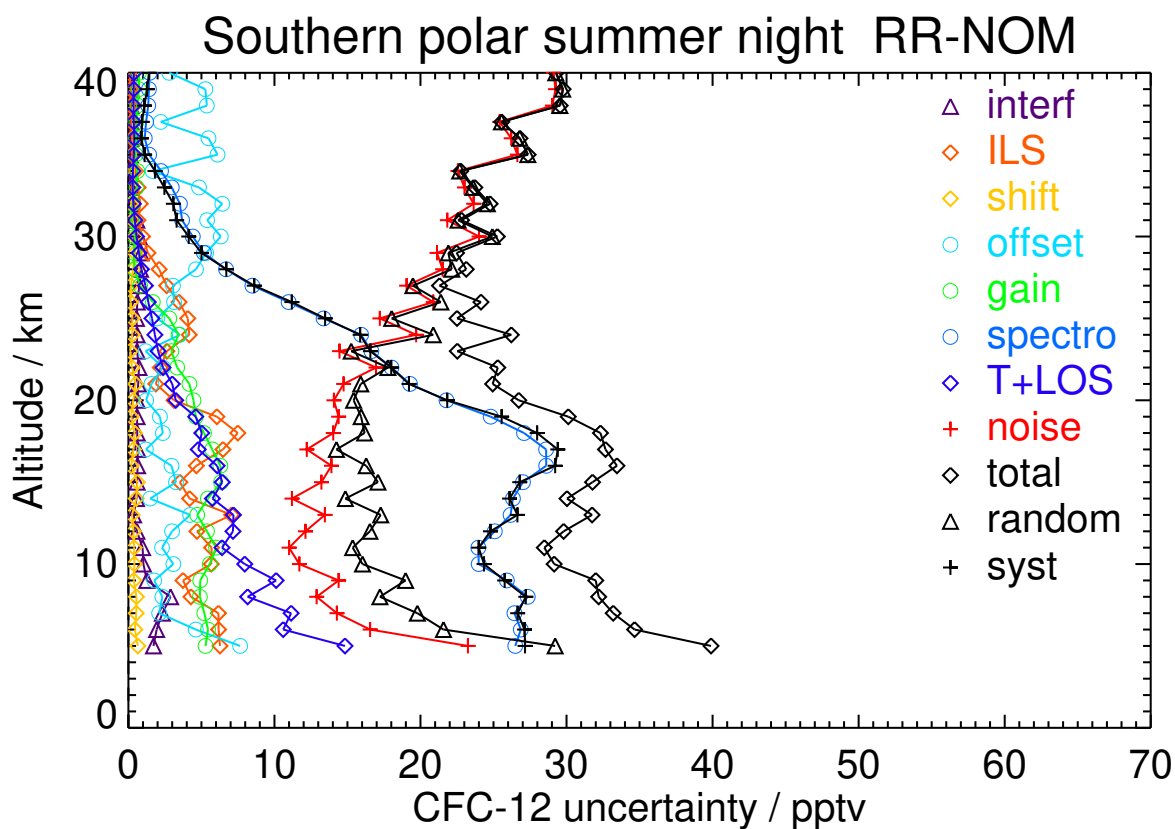

**Figure S66.** V8R\_F-12\_261 Southern polar summer night

**Table S68.** CFC-12 error budget for Southern polar autumn day. All uncertainties are  $1\sigma$ .

| altitude<br>(km) | mean target<br>(pptv) | interf<br>(pptv) | ILS<br>(pptv) | shift<br>(pptv) | offset<br>(pptv) | gain<br>(pptv) | spectro<br>(pptv) | T+LOS<br>(pptv) | noise<br>(pptv) | random<br>(pptv) | syst<br>(pptv) | total<br>(pptv) |
|------------------|-----------------------|------------------|---------------|-----------------|------------------|----------------|-------------------|-----------------|-----------------|------------------|----------------|-----------------|
| 5                | 532.63                | 2.72             | 4.30          | 0.69            | 8.00             | 5.15           | 33.65             | 17.01           | 24.93           | 32.61            | 33.12          | 46.48           |
| 8                | 530.57                | 1.50             | 3.36          | 0.52            | 2.32             | 6.01           | 28.48             | 9.36            | 14.06           | 18.36            | 28.55          | 33.94           |
| 11               | 497.33                | 0.60             | 3.46          | 0.40            | 3.69             | 5.76           | 24.90             | 7.37            | 13.08           | 16.39            | 25.22          | 30.08           |
| 14               | 477.86                | 0.44             | 3.64          | 0.63            | 2.94             | 7.15           | 28.99             | 6.84            | 13.61           | 16.10            | 29.77          | 33.85           |
| 17               | 374.23                | 0.60             | 5.76          | 0.30            | 1.99             | 5.79           | 27.81             | 5.04            | 14.81           | 16.26            | 28.72          | 33.00           |
| 20               | 267.00                | 0.51             | 3.13          | 0.32            | 1.27             | 4.82           | 24.23             | 3.35            | 16.96           | 18.02            | 24.42          | 30.35           |
| 23               | 142.47                | 0.33             | 2.78          | 0.08            | 1.83             | 2.36           | 16.68             | 2.04            | 18.15           | 18.70            | 16.70          | 25.07           |
| 26               | 64.34                 | 0.35             | 1.97          | 0.14            | 3.71             | 1.00           | 8.51              | 1.06            | 24.06           | 24.56            | 8.24           | 25.90           |
| 29               | 22.16                 | 0.34             | 1.27          | 0.21            | 7.07             | 0.40           | 4.11              | 0.63            | 26.29           | 27.31            | 3.81           | 27.58           |
| 32               | 0.31                  | 0.13             | 0.82          | 0.17            | 6.77             | 0.18           | 2.41              | 0.51            | 30.92           | 31.73            | 1.27           | 31.76           |
| 35               | -2.00                 | 0.11             | 0.38          | 0.34            | 5.41             | 0.19           | 1.41              | 0.46            | 34.49           | 34.94            | 0.75           | 34.95           |
| 38               | -6.62                 | 0.17             | 0.38          | 0.41            | 5.50             | 0.21           | 1.53              | 0.56            | 38.71           | 39.13            | 0.80           | 39.13           |
| 41               | -5.64                 | 0.30             | 0.61          | 0.41            | 7.88             | 0.26           | 1.38              | 0.63            | 42.30           | 43.06            | 0.75           | 43.07           |

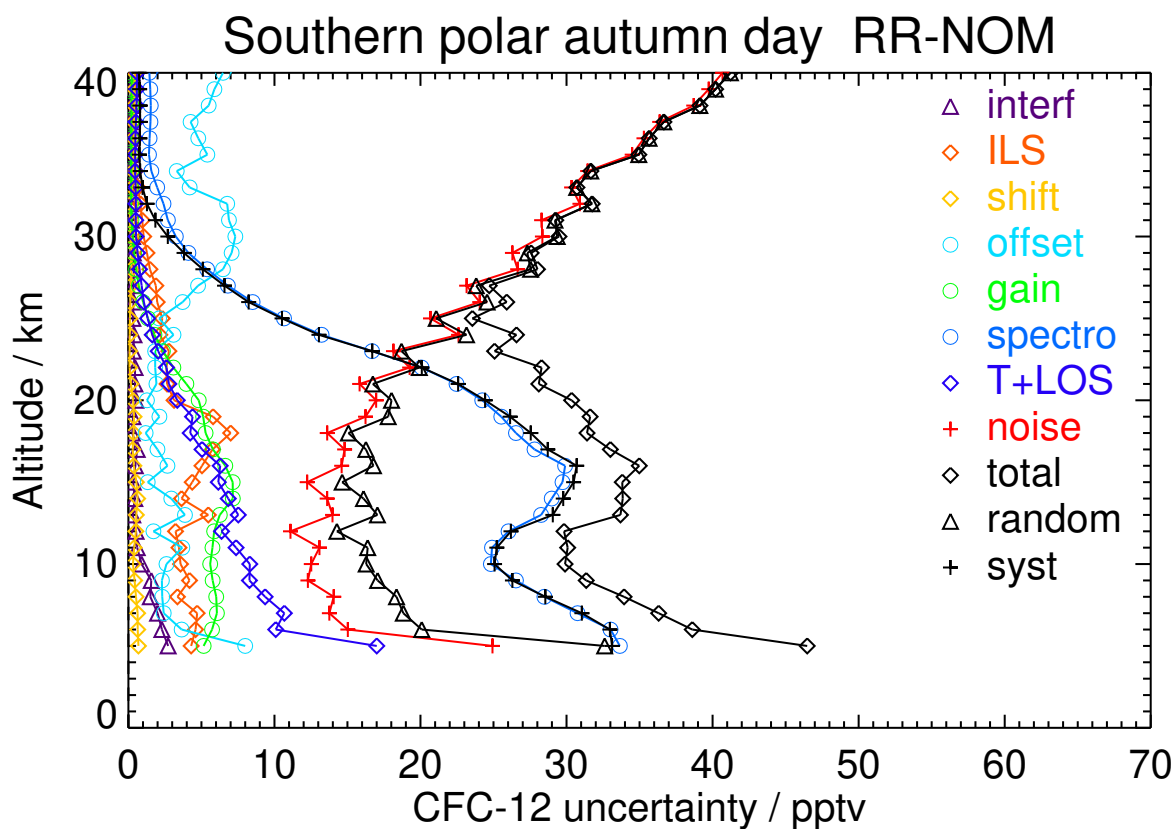

**Figure S67.** V8R\_F-12\_261 Southern polar autumn day

**Table S69.** CFC-12 error budget for Southern polar autumn night. All uncertainties are  $1\sigma$ .

| altitude<br>(km) | mean target<br>(pptv) | interf<br>(pptv) | ILS<br>(pptv) | shift<br>(pptv) | offset<br>(pptv) | gain<br>(pptv) | spectro<br>(pptv) | T+LOS<br>(pptv) | noise<br>(pptv) | random<br>(pptv) | syst<br>(pptv) | total<br>(pptv) |
|------------------|-----------------------|------------------|---------------|-----------------|------------------|----------------|-------------------|-----------------|-----------------|------------------|----------------|-----------------|
| 5                | 527.01                | 2.48             | 5.80          | 0.73            | 7.10             | 5.57           | 30.85             | 14.85           | 22.27           | 30.25            | 29.58          | 42.31           |
| 8                | 525.28                | 1.89             | 5.50          | 0.59            | 2.59             | 5.83           | 24.97             | 10.19           | 15.19           | 20.92            | 24.39          | 32.14           |
| 11               | 499.87                | 0.74             | 4.22          | 0.26            | 3.99             | 5.88           | 23.24             | 7.57            | 13.41           | 16.81            | 23.74          | 29.09           |
| 14               | 473.31                | 0.32             | 3.92          | 0.66            | 2.91             | 6.74           | 29.30             | 7.19            | 13.85           | 16.79            | 29.83          | 34.23           |
| 17               | 348.18                | 0.50             | 7.01          | 0.37            | 1.96             | 6.34           | 28.51             | 5.32            | 15.01           | 16.89            | 29.58          | 34.06           |
| 20               | 231.88                | 0.44             | 3.55          | 0.27            | 1.28             | 3.59           | 21.41             | 3.17            | 17.11           | 17.84            | 21.69          | 28.09           |
| 23               | 117.06                | 0.34             | 2.70          | 0.09            | 1.80             | 1.95           | 14.85             | 1.85            | 18.61           | 19.15            | 14.76          | 24.18           |
| 26               | 48.80                 | 0.36             | 1.70          | 0.13            | 3.88             | 0.73           | 7.18              | 0.89            | 24.56           | 25.13            | 6.52           | 25.96           |
| 29               | 18.60                 | 0.33             | 1.01          | 0.19            | 7.48             | 0.28           | 3.74              | 0.59            | 27.18           | 28.29            | 3.16           | 28.46           |
| 32               | -4.81                 | 0.14             | 0.65          | 0.14            | 7.13             | 0.13           | 2.43              | 0.50            | 31.67           | 32.54            | 1.32           | 32.57           |
| 35               | 1.21                  | 0.12             | 0.35          | 0.31            | 5.09             | 0.14           | 1.54              | 0.49            | 35.15           | 35.55            | 0.56           | 35.56           |
| 38               | 2.03                  | 0.19             | 0.34          | 0.38            | 5.57             | 0.18           | 1.44              | 0.52            | 39.29           | 39.71            | 0.60           | 39.72           |
| 41               | -2.46                 | 0.27             | 0.50          | 0.38            | 7.89             | 0.28           | 1.28              | 0.63            | 42.46           | 43.21            | 0.66           | 43.22           |

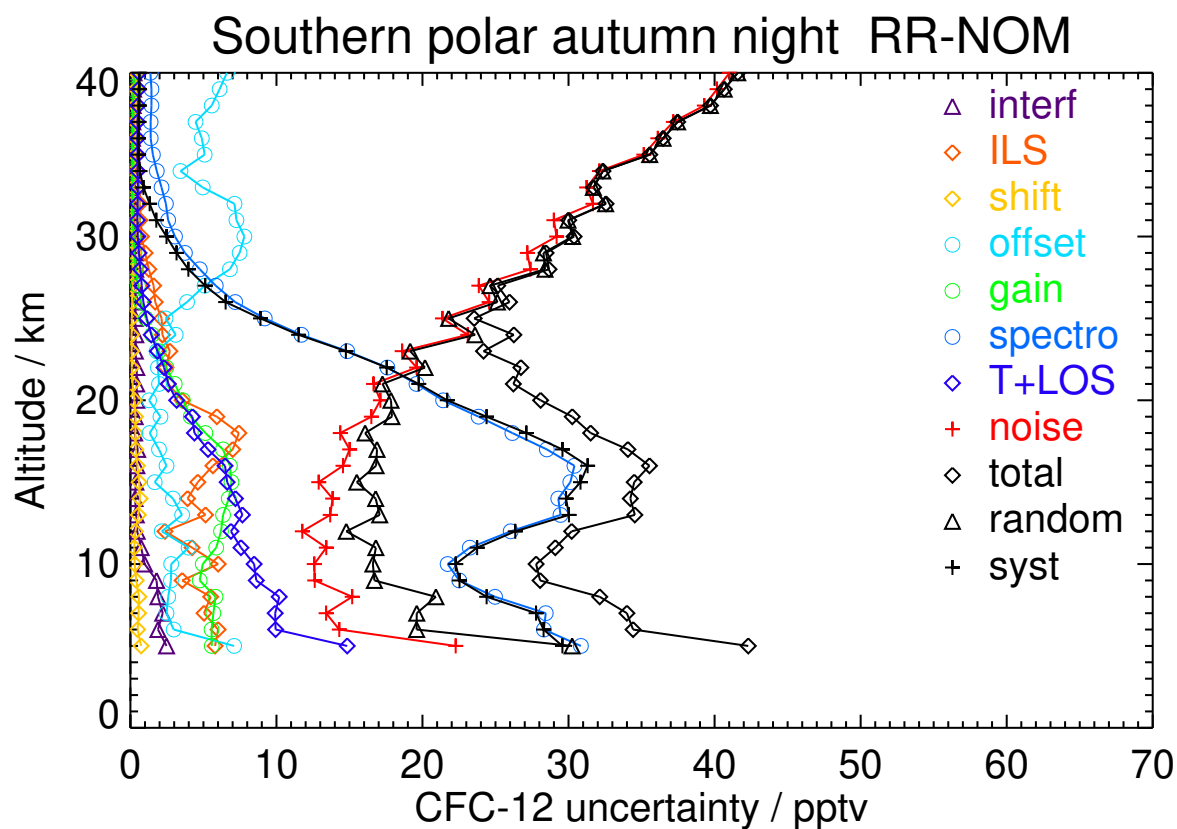

**Figure S68.** V8R\_F-12\_261 Southern polar autumn night

**Table S70.** CFC-12 error budget for Northern polar winter day. All uncertainties are  $1\sigma$ .

| altitude<br>(km) | mean target<br>(pptv) | interf<br>(pptv) | ILS<br>(pptv) | shift<br>(pptv) | offset<br>(pptv) | gain<br>(pptv) | spectro<br>(pptv) | T+LOS<br>(pptv) | noise<br>(pptv) | random<br>(pptv) | syst<br>(pptv) | total<br>(pptv) |
|------------------|-----------------------|------------------|---------------|-----------------|------------------|----------------|-------------------|-----------------|-----------------|------------------|----------------|-----------------|
| 14               | 176.67                | 1.16             | 1.02          | 0.44            | 7.04             | 2.78           | 15.15             | 3.94            | 14.11           | 21.23            | 7.32           | 22.45           |
| 17               | 308.44                | 0.72             | 1.57          | 0.21            | 2.81             | 4.10           | 20.25             | 3.17            | 9.00            | 13.44            | 18.66          | 23.00           |
| 20               | 248.65                | 0.61             | 1.55          | 0.15            | 2.25             | 4.08           | 19.21             | 2.45            | 9.76            | 13.85            | 17.40          | 22.24           |
| 23               | 180.21                | 0.60             | 1.25          | 0.10            | 3.50             | 2.79           | 14.66             | 1.46            | 14.50           | 16.89            | 12.81          | 21.20           |
| 26               | 156.68                | 0.57             | 0.95          | 0.11            | 5.33             | 1.78           | 11.08             | 0.60            | 19.38           | 20.63            | 10.30          | 23.06           |
| 29               | 118.63                | 0.46             | 1.13          | 0.19            | 7.16             | 1.59           | 10.67             | 0.23            | 24.63           | 25.93            | 10.19          | 27.86           |
| 32               | 52.43                 | 0.20             | 0.91          | 0.25            | 6.25             | 0.63           | 7.27              | 0.11            | 27.34           | 28.21            | 6.69           | 29.00           |
| 35               | 9.27                  | 0.08             | 0.52          | 0.33            | 4.83             | 0.27           | 3.43              | 0.09            | 31.17           | 31.61            | 2.86           | 31.73           |
| 38               | -9.37                 | 0.08             | 0.33          | 0.39            | 5.48             | 0.19           | 2.06              | 0.07            | 36.50           | 36.95            | 1.26           | 36.97           |
| 41               | -11.99                | 0.07             | 0.34          | 0.45            | 9.80             | 0.19           | 1.41              | 0.06            | 41.92           | 43.07            | 0.82           | 43.08           |
| 44               | -1.91                 | 0.08             | 0.39          | 0.48            | 18.64            | 0.22           | 1.33              | 0.06            | 48.42           | 51.90            | 0.84           | 51.91           |
| 47               | 1.79                  | 0.13             | 0.39          | 0.47            | 30.99            | 0.28           | 1.56              | 0.07            | 58.42           | 66.15            | 0.92           | 66.15           |
| 50               | -4.43                 | 0.17             | 0.34          | 0.43            | 45.09            | 0.38           | 1.79              | 0.08            | 72.09           | 85.05            | 1.01           | 85.05           |

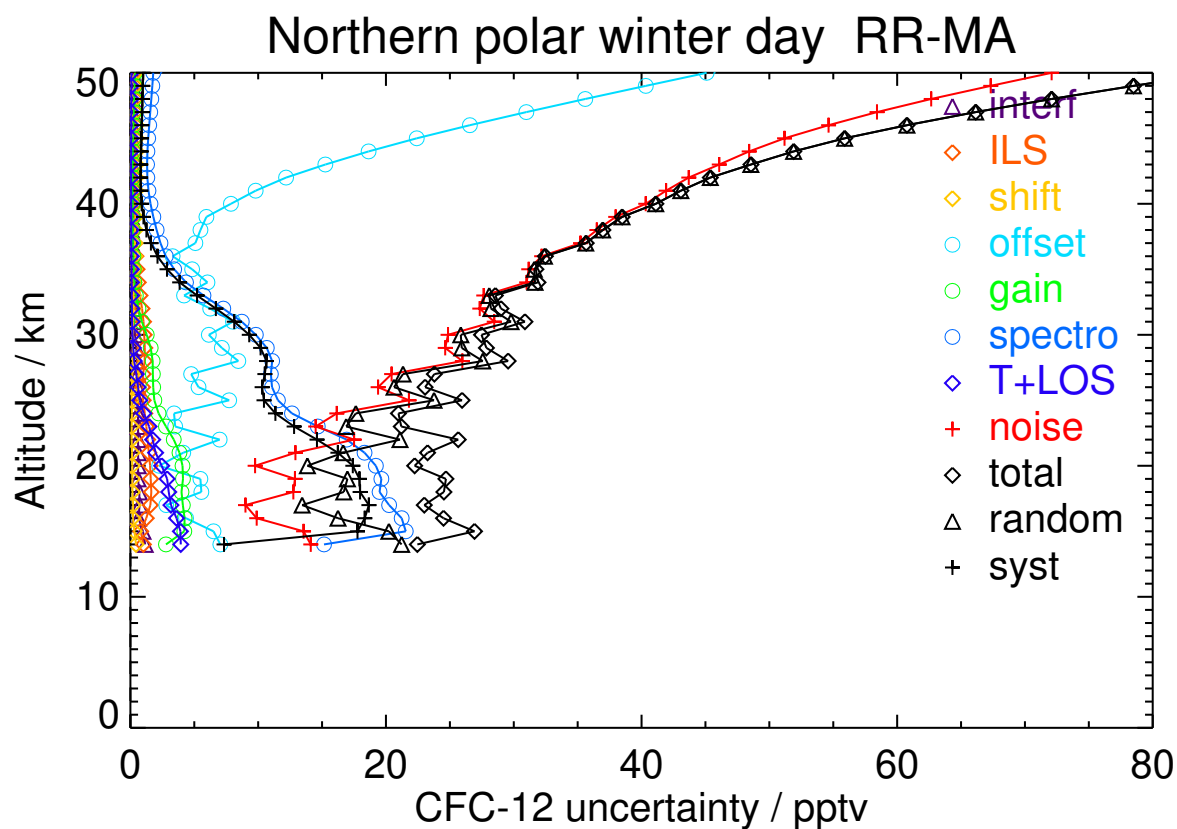

**Figure S69.** V8R\_F-12\_561 Northern polar winter day

**Table S71.** CFC-12 error budget for Northern polar winter night. All uncertainties are  $1\sigma$ .

| altitude<br>(km) | mean target<br>(pptv) | interf<br>(pptv) | ILS<br>(pptv) | shift<br>(pptv) | offset<br>(pptv) | gain<br>(pptv) | spectro<br>(pptv) | T+LOS<br>(pptv) | noise<br>(pptv) | random<br>(pptv) | syst<br>(pptv) | total<br>(pptv) |
|------------------|-----------------------|------------------|---------------|-----------------|------------------|----------------|-------------------|-----------------|-----------------|------------------|----------------|-----------------|
| 14               | 422.63                | 1.43             | 0.19          | 0.46            | 7.15             | 6.57           | 27.98             | 3.79            | 15.20           | 18.70            | 27.84          | 33.54           |
| 17               | 287.53                | 0.57             | 3.85          | 0.28            | 7.60             | 3.61           | 22.89             | 3.94            | 18.59           | 23.20            | 20.81          | 31.16           |
| 20               | 217.14                | 0.48             | 3.67          | 0.23            | 2.47             | 2.99           | 19.97             | 3.09            | 12.88           | 15.17            | 19.31          | 24.56           |
| 23               | 103.12                | 0.49             | 2.31          | 0.12            | 3.83             | 2.41           | 14.02             | 1.94            | 19.62           | 21.25            | 12.63          | 24.72           |
| 26               | 55.96                 | 0.50             | 1.12          | 0.08            | 6.08             | 1.55           | 8.27              | 0.78            | 25.32           | 26.89            | 5.26           | 27.40           |
| 29               | 30.93                 | 0.43             | 0.68          | 0.16            | 8.88             | 0.86           | 6.06              | 0.31            | 30.53           | 32.18            | 3.70           | 32.39           |
| 32               | 20.61                 | 0.25             | 0.51          | 0.17            | 8.79             | 0.27           | 3.66              | 0.17            | 33.16           | 34.41            | 2.59           | 34.50           |
| 35               | 10.42                 | 0.12             | 0.40          | 0.28            | 6.17             | 0.16           | 2.26              | 0.09            | 35.90           | 36.46            | 1.57           | 36.50           |
| 38               | -6.29                 | 0.10             | 0.40          | 0.38            | 5.97             | 0.17           | 1.76              | 0.07            | 39.22           | 39.70            | 1.16           | 39.71           |
| 41               | -6.05                 | 0.10             | 0.37          | 0.44            | 9.28             | 0.21           | 1.49              | 0.07            | 43.23           | 44.24            | 0.93           | 44.25           |
| 44               | 2.91                  | 0.11             | 0.32          | 0.46            | 15.97            | 0.24           | 1.53              | 0.09            | 47.72           | 50.34            | 0.91           | 50.34           |
| 47               | 4.15                  | 0.16             | 0.28          | 0.43            | 26.02            | 0.28           | 1.78              | 0.10            | 54.25           | 60.19            | 1.04           | 60.20           |
| 50               | 7.57                  | 0.20             | 0.24          | 0.40            | 38.51            | 0.32           | 2.08              | 0.11            | 64.57           | 75.20            | 1.23           | 75.21           |

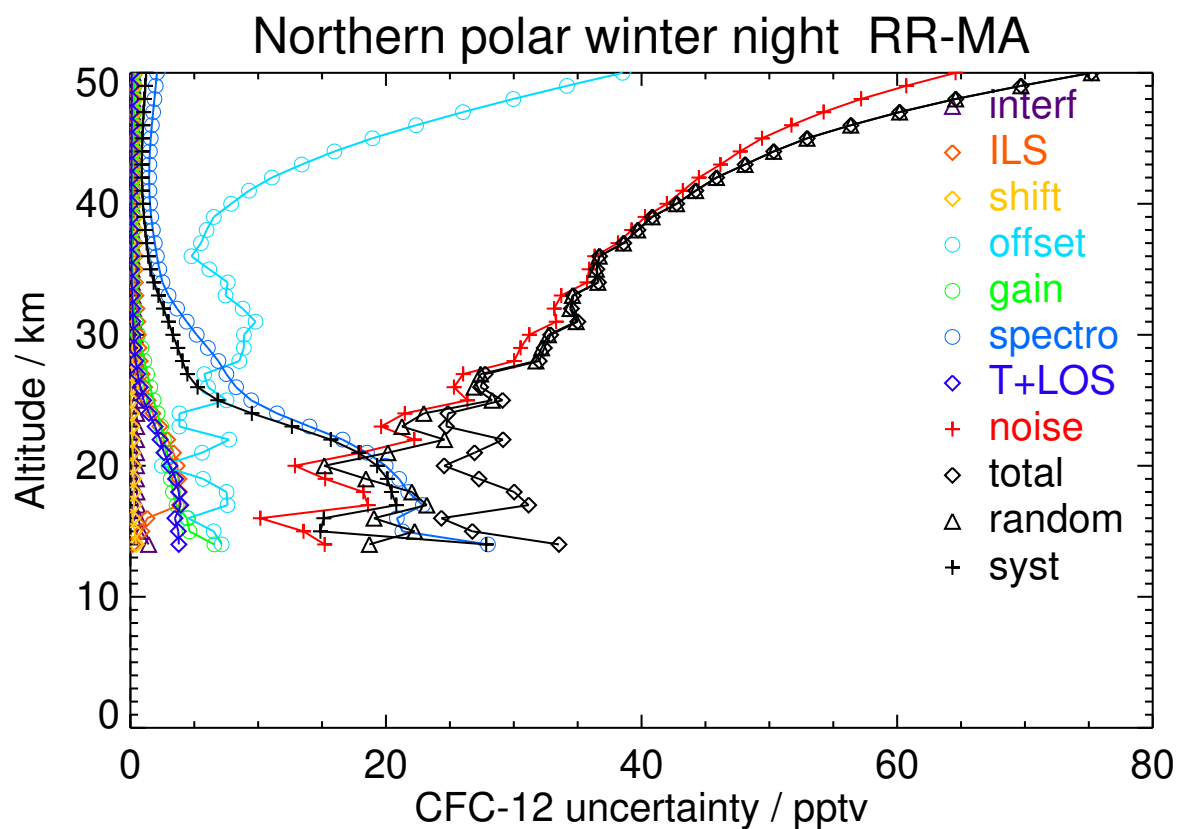

**Figure S70.** V8R\_F-12\_561 Northern polar winter night

**Table S72.** CFC-12 error budget for Northern polar spring day. All uncertainties are  $1\sigma$ .

| altitude<br>(km) | mean target<br>(pptv) | interf<br>(pptv) | ILS<br>(pptv) | shift<br>(pptv) | offset<br>(pptv) | gain<br>(pptv) | spectro<br>(pptv) | T+LOS<br>(pptv) | noise<br>(pptv) | random<br>(pptv) | syst<br>(pptv) | total<br>(pptv) |
|------------------|-----------------------|------------------|---------------|-----------------|------------------|----------------|-------------------|-----------------|-----------------|------------------|----------------|-----------------|
| 17               | 288.38                | 0.60             | 2.20          | 0.22            | 8.78             | 3.25           | 19.49             | 3.51            | 19.63           | 22.30            | 19.32          | 29.50           |
| 20               | 232.01                | 0.54             | 2.49          | 0.12            | 2.57             | 2.84           | 17.33             | 2.40            | 11.03           | 11.88            | 17.54          | 21.19           |
| 23               | 157.16                | 0.53             | 1.79          | 0.08            | 1.68             | 1.84           | 13.01             | 1.75            | 15.59           | 15.95            | 13.07          | 20.62           |
| 26               | 115.29                | 0.55             | 1.82          | 0.08            | 3.35             | 1.30           | 9.54              | 1.20            | 21.47           | 21.89            | 9.52           | 23.87           |
| 29               | 65.28                 | 0.56             | 1.58          | 0.33            | 7.05             | 0.87           | 7.07              | 0.65            | 26.68           | 27.73            | 6.81           | 28.56           |
| 32               | 29.72                 | 0.36             | 0.73          | 0.19            | 7.85             | 0.34           | 3.96              | 0.33            | 30.34           | 31.40            | 3.61           | 31.60           |
| 35               | 1.40                  | 0.12             | 0.49          | 0.36            | 4.02             | 0.38           | 2.43              | 0.20            | 30.34           | 30.66            | 1.72           | 30.71           |
| 38               | -6.78                 | 0.14             | 0.26          | 0.47            | 3.85             | 0.41           | 1.38              | 0.14            | 32.91           | 33.15            | 1.14           | 33.17           |
| 41               | -20.82                | 0.14             | 0.33          | 0.55            | 4.33             | 0.42           | 1.30              | 0.11            | 35.76           | 36.03            | 1.21           | 36.05           |
| 44               | -16.12                | 0.12             | 0.34          | 0.57            | 5.91             | 0.36           | 1.09              | 0.10            | 38.64           | 39.10            | 0.91           | 39.11           |
| 47               | -6.27                 | 0.13             | 0.28          | 0.52            | 10.25            | 0.30           | 1.10              | 0.12            | 41.64           | 42.89            | 0.68           | 42.90           |
| 50               | 0.58                  | 0.16             | 0.20          | 0.44            | 18.13            | 0.31           | 1.36              | 0.13            | 46.72           | 50.13            | 0.85           | 50.13           |

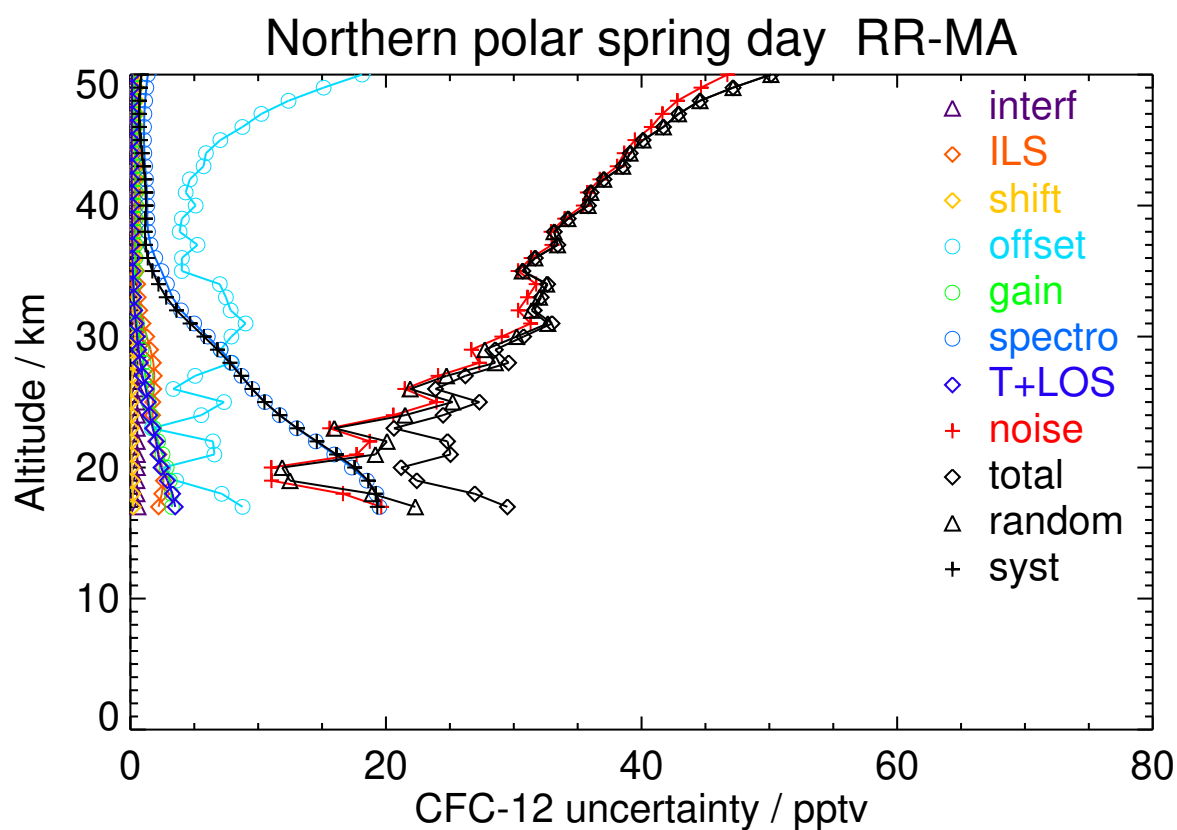

**Figure S71.** V8R\_F-12\_561 Northern polar spring day

**Table S73.** CFC-12 error budget for Northern polar spring night. All uncertainties are  $1\sigma$ .

| altitude<br>(km) | mean target<br>(pptv) | interf<br>(pptv) | ILS<br>(pptv) | shift<br>(pptv) | offset<br>(pptv) | gain<br>(pptv) | spectro<br>(pptv) | T+LOS<br>(pptv) | noise<br>(pptv) | random<br>(pptv) | syst<br>(pptv) | total<br>(pptv) |
|------------------|-----------------------|------------------|---------------|-----------------|------------------|----------------|-------------------|-----------------|-----------------|------------------|----------------|-----------------|
| 17               | 308.19                | 0.63             | 2.78          | 0.23            | 8.67             | 4.40           | 20.32             | 3.61            | 19.29           | 21.99            | 20.42          | 30.01           |
| 20               | 252.30                | 0.55             | 3.08          | 0.13            | 2.39             | 3.75           | 18.64             | 2.46            | 10.70           | 11.86            | 18.90          | 22.31           |
| 23               | 168.35                | 0.54             | 2.00          | 0.09            | 1.91             | 2.06           | 14.40             | 1.78            | 15.51           | 16.00            | 14.39          | 21.52           |
| 26               | 119.87                | 0.56             | 1.93          | 0.11            | 3.41             | 1.33           | 9.92              | 1.22            | 21.12           | 21.57            | 9.90           | 23.74           |
| 29               | 69.77                 | 0.57             | 1.63          | 0.35            | 6.92             | 0.88           | 7.26              | 0.66            | 26.03           | 27.04            | 7.15           | 27.97           |
| 32               | 30.88                 | 0.37             | 0.84          | 0.21            | 7.64             | 0.41           | 4.34              | 0.33            | 29.64           | 30.70            | 3.79           | 30.94           |
| 35               | 2.27                  | 0.12             | 0.52          | 0.40            | 3.79             | 0.44           | 2.39              | 0.21            | 29.31           | 29.61            | 1.81           | 29.66           |
| 38               | -1.93                 | 0.13             | 0.27          | 0.50            | 3.65             | 0.48           | 1.63              | 0.14            | 32.13           | 32.36            | 1.25           | 32.39           |
| 41               | 2.48                  | 0.13             | 0.34          | 0.57            | 4.20             | 0.49           | 1.53              | 0.12            | 35.17           | 35.44            | 1.30           | 35.46           |
| 44               | 1.48                  | 0.11             | 0.43          | 0.58            | 5.95             | 0.44           | 1.48              | 0.10            | 38.39           | 38.86            | 1.28           | 38.89           |
| 47               | -17.10                | 0.13             | 0.39          | 0.54            | 10.40            | 0.36           | 1.29              | 0.12            | 41.70           | 42.99            | 0.92           | 43.00           |
| 50               | -19.39                | 0.16             | 0.29          | 0.47            | 18.61            | 0.29           | 1.27              | 0.13            | 47.14           | 50.70            | 0.69           | 50.70           |

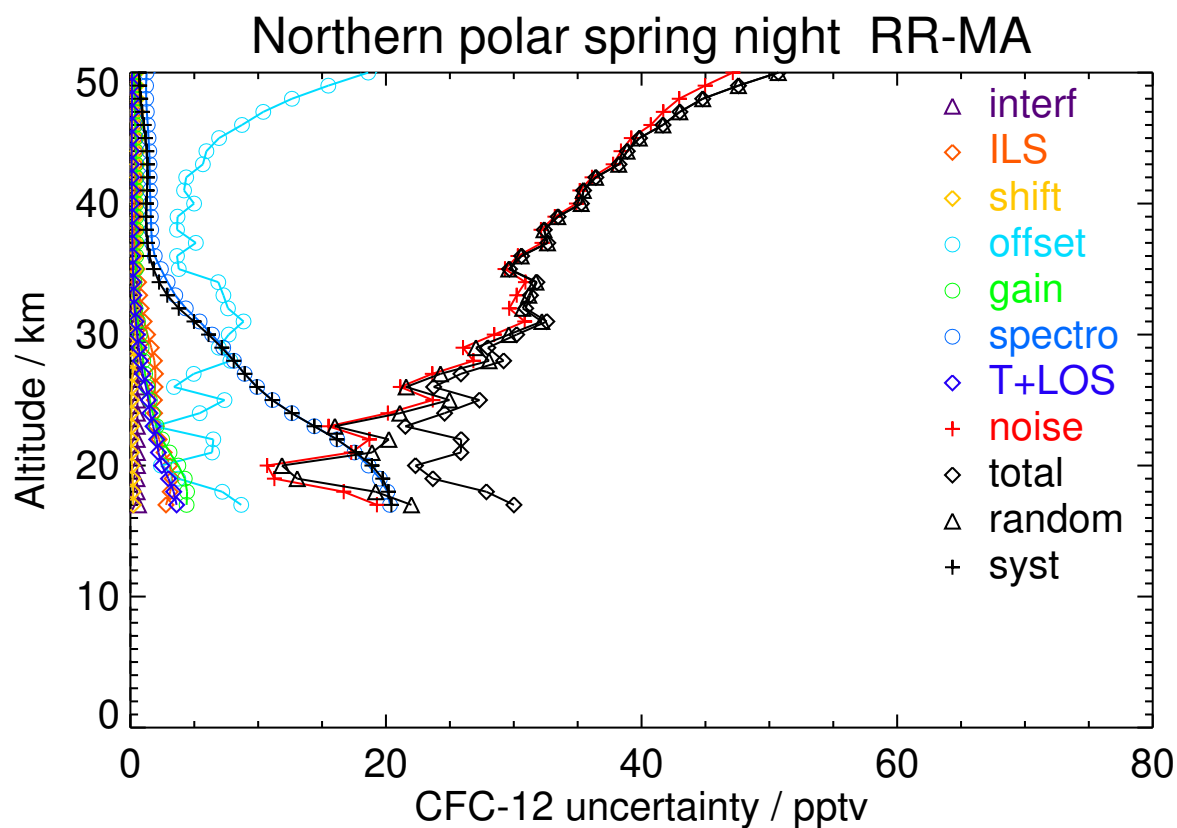

**Figure S72.** V8R\_F-12\_561 Northern polar spring night

**Table S74.** CFC-12 error budget for Northern polar summer day. All uncertainties are  $1\sigma$ .

| altitude<br>(km) | mean target<br>(pptv) | interf<br>(pptv) | ILS<br>(pptv) | shift<br>(pptv) | offset<br>(pptv) | gain<br>(pptv) | spectro<br>(pptv) | T+LOS<br>(pptv) | noise<br>(pptv) | random<br>(pptv) | syst<br>(pptv) | total<br>(pptv) |
|------------------|-----------------------|------------------|---------------|-----------------|------------------|----------------|-------------------|-----------------|-----------------|------------------|----------------|-----------------|
| 17               | 405.55                | 0.99             | 1.93          | 0.31            | 7.60             | 5.09           | 26.69             | 3.82            | 16.63           | 19.14            | 26.94          | 33.05           |
| 20               | 319.51                | 0.74             | 2.38          | 0.08            | 2.11             | 4.68           | 23.12             | 2.58            | 8.76            | 9.83             | 23.54          | 25.51           |
| 23               | 204.42                | 0.69             | 1.19          | 0.08            | 1.31             | 3.07           | 16.39             | 2.20            | 11.86           | 12.29            | 16.62          | 20.67           |
| 26               | 151.57                | 0.68             | 4.39          | 0.20            | 2.21             | 2.33           | 12.47             | 1.79            | 16.26           | 17.41            | 12.24          | 21.29           |
| 29               | 90.72                 | 0.74             | 2.17          | 0.34            | 5.30             | 1.04           | 8.36              | 0.98            | 20.01           | 20.89            | 8.33           | 22.49           |
| 32               | 43.40                 | 0.50             | 1.14          | 0.32            | 6.31             | 0.44           | 4.63              | 0.34            | 23.90           | 24.80            | 4.40           | 25.18           |
| 35               | 4.71                  | 0.12             | 0.58          | 0.42            | 3.18             | 0.58           | 2.25              | 0.22            | 22.65           | 22.94            | 1.71           | 23.00           |
| 38               | -3.12                 | 0.15             | 0.11          | 0.42            | 3.62             | 0.54           | 1.40              | 0.19            | 26.26           | 26.54            | 0.98           | 26.56           |
| 41               | -4.17                 | 0.17             | 0.17          | 0.52            | 3.73             | 0.67           | 1.68              | 0.18            | 29.37           | 29.62            | 1.61           | 29.67           |
| 44               | 1.73                  | 0.15             | 0.33          | 0.62            | 3.88             | 0.62           | 1.61              | 0.13            | 32.20           | 32.45            | 1.49           | 32.48           |
| 47               | -3.09                 | 0.11             | 0.27          | 0.49            | 5.06             | 0.48           | 1.25              | 0.14            | 35.47           | 35.84            | 1.08           | 35.86           |
| 50               | -11.05                | 0.13             | 0.24          | 0.36            | 8.50             | 0.44           | 1.10              | 0.19            | 39.03           | 39.96            | 0.85           | 39.97           |

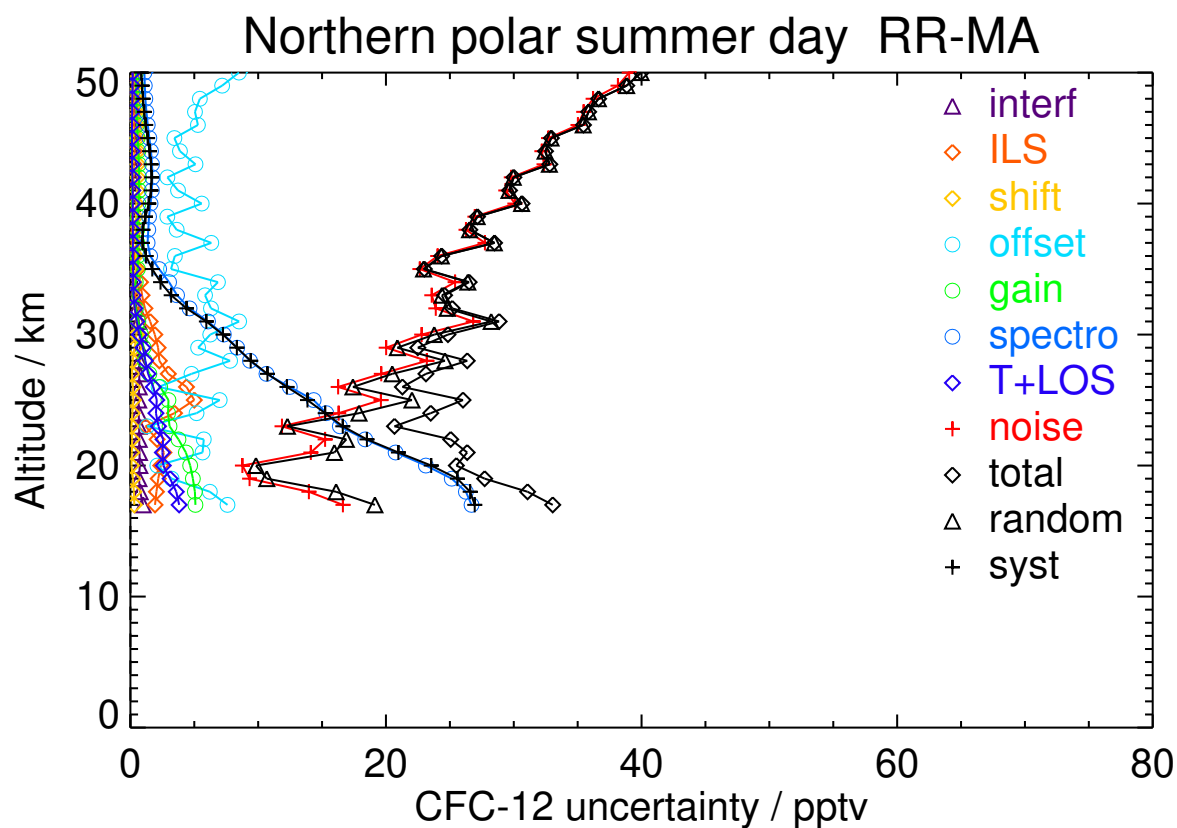

**Figure S73.** V8R\_F-12\_561 Northern polar summer day

**Table S75.** CFC-12 error budget for Northern polar summer night. All uncertainties are  $1\sigma$ .

| altitude<br>(km) | mean target<br>(pptv) | interf<br>(pptv) | ILS<br>(pptv) | shift<br>(pptv) | offset<br>(pptv) | gain<br>(pptv) | spectro<br>(pptv) | T+LOS<br>(pptv) | noise<br>(pptv) | random<br>(pptv) | syst<br>(pptv) | total<br>(pptv) |
|------------------|-----------------------|------------------|---------------|-----------------|------------------|----------------|-------------------|-----------------|-----------------|------------------|----------------|-----------------|
| 17               | 402.48                | 0.82             | 2.24          | 0.15            | 8.09             | 5.28           | 25.68             | 3.74            | 17.24           | 19.89            | 25.96          | 32.71           |
| 20               | 325.36                | 0.66             | 3.00          | 0.09            | 2.07             | 4.66           | 23.69             | 2.57            | 9.03            | 10.14            | 24.13          | 26.17           |
| 23               | 204.18                | 0.59             | 1.83          | 0.07            | 1.76             | 3.15           | 17.62             | 2.30            | 12.93           | 13.49            | 17.82          | 22.35           |
| 26               | 132.61                | 0.63             | 2.06          | 0.08            | 2.91             | 1.77           | 11.05             | 1.83            | 17.87           | 18.36            | 11.13          | 21.47           |
| 29               | 68.90                 | 0.66             | 1.91          | 0.34            | 5.96             | 0.88           | 7.89              | 0.97            | 22.06           | 22.95            | 7.98           | 24.29           |
| 32               | 20.00                 | 0.41             | 0.64          | 0.23            | 6.80             | 0.25           | 3.23              | 0.36            | 25.98           | 26.91            | 2.82           | 27.06           |
| 35               | 9.69                  | 0.10             | 0.35          | 0.39            | 3.47             | 0.51           | 1.78              | 0.19            | 25.18           | 25.46            | 1.25           | 25.49           |
| 38               | -7.98                 | 0.12             | 0.18          | 0.46            | 3.81             | 0.47           | 1.68              | 0.15            | 28.91           | 29.19            | 1.26           | 29.22           |
| 41               | -5.61                 | 0.13             | 0.23          | 0.54            | 3.83             | 0.49           | 1.75              | 0.13            | 32.14           | 32.39            | 1.52           | 32.42           |
| 44               | -2.60                 | 0.11             | 0.37          | 0.55            | 4.69             | 0.46           | 1.59              | 0.10            | 35.71           | 36.03            | 1.39           | 36.06           |
| 47               | -3.39                 | 0.10             | 0.39          | 0.52            | 7.87             | 0.40           | 1.24              | 0.12            | 39.21           | 40.01            | 1.08           | 40.02           |
| 50               | -8.75                 | 0.13             | 0.35          | 0.48            | 14.70            | 0.36           | 1.24              | 0.13            | 43.77           | 46.19            | 0.91           | 46.20           |

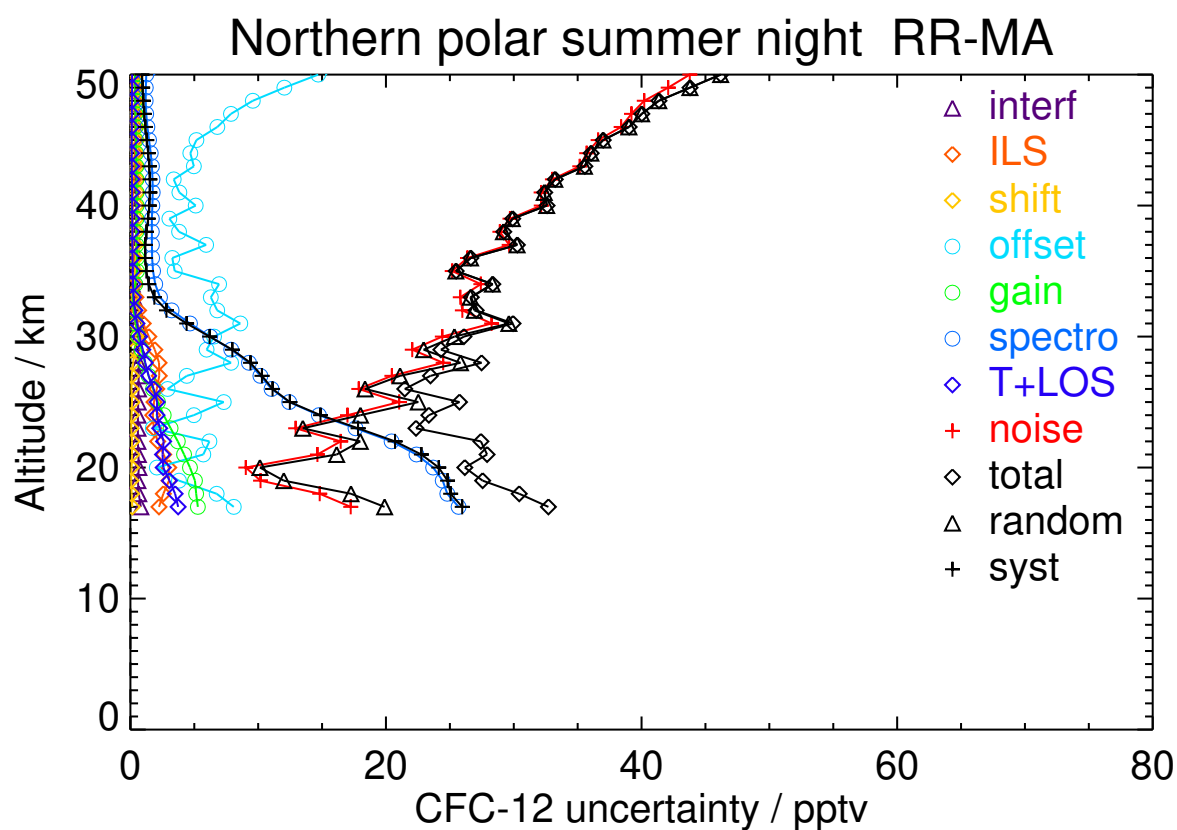

**Figure S74.** V8R\_F-12\_561 Northern polar summer night

**Table S76.** CFC-12 error budget for Northern polar autumn day. All uncertainties are  $1\sigma$ .

| altitude<br>(km) | mean target<br>(pptv) | interf<br>(pptv) | ILS<br>(pptv) | shift<br>(pptv) | offset<br>(pptv) | gain<br>(pptv) | spectro<br>(pptv) | T+LOS<br>(pptv) | noise<br>(pptv) | random<br>(pptv) | syst<br>(pptv) | total<br>(pptv) |
|------------------|-----------------------|------------------|---------------|-----------------|------------------|----------------|-------------------|-----------------|-----------------|------------------|----------------|-----------------|
| 17               | 348.39                | 0.55             | 2.33          | 0.22            | 9.03             | 4.24           | 23.13             | 3.81            | 20.20           | 23.36            | 22.74          | 32.60           |
| 20               | 281.80                | 0.52             | 2.94          | 0.12            | 1.96             | 3.82           | 21.70             | 2.98            | 10.33           | 11.62            | 21.88          | 24.78           |
| 23               | 167.80                | 0.50             | 2.26          | 0.07            | 2.20             | 2.57           | 17.10             | 2.76            | 15.88           | 16.66            | 17.07          | 23.85           |
| 26               | 93.71                 | 0.52             | 1.54          | 0.07            | 4.02             | 1.36           | 9.57              | 1.44            | 21.59           | 22.21            | 9.33           | 24.09           |
| 29               | 43.89                 | 0.47             | 1.02          | 0.22            | 7.18             | 0.70           | 5.79              | 0.42            | 26.94           | 28.03            | 5.17           | 28.51           |
| 32               | 15.78                 | 0.30             | 0.54          | 0.13            | 7.94             | 0.33           | 3.17              | 0.13            | 31.19           | 32.25            | 2.49           | 32.35           |
| 35               | -6.04                 | 0.10             | 0.33          | 0.30            | 4.50             | 0.24           | 1.59              | 0.10            | 32.17           | 32.51            | 1.08           | 32.53           |
| 38               | -10.71                | 0.08             | 0.30          | 0.42            | 4.31             | 0.25           | 1.35              | 0.08            | 35.78           | 36.06            | 0.81           | 36.07           |
| 41               | -13.02                | 0.08             | 0.35          | 0.49            | 5.55             | 0.25           | 1.32              | 0.07            | 39.37           | 39.78            | 0.84           | 39.79           |
| 44               | -6.43                 | 0.08             | 0.36          | 0.52            | 9.30             | 0.25           | 1.27              | 0.08            | 42.73           | 43.74            | 0.85           | 43.75           |
| 47               | -1.18                 | 0.11             | 0.33          | 0.49            | 16.42            | 0.25           | 1.39              | 0.09            | 46.78           | 49.59            | 0.90           | 49.60           |
| 50               | 6.09                  | 0.15             | 0.27          | 0.42            | 27.03            | 0.24           | 1.60              | 0.08            | 54.91           | 61.21            | 1.02           | 61.22           |

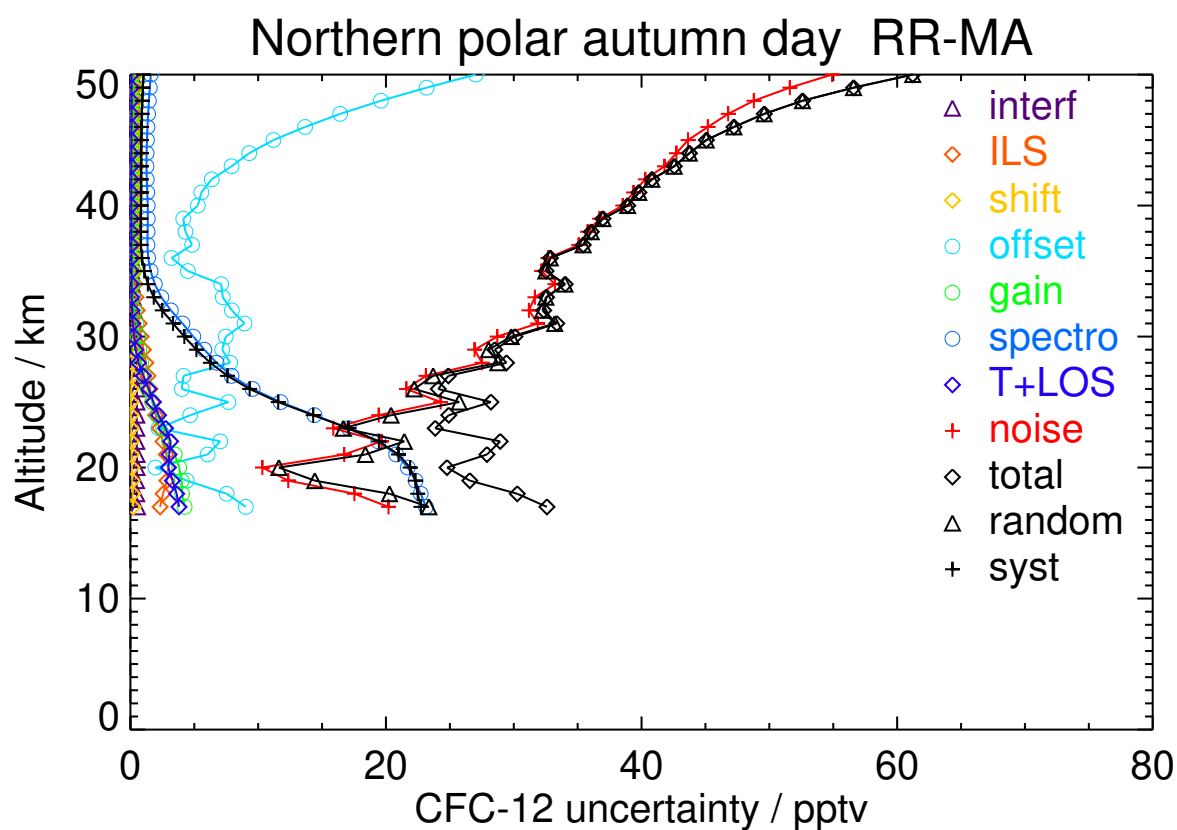

**Figure S75.** V8R\_F-12\_561 Northern polar autumn day

**Table S77.** CFC-12 error budget for Northern polar autumn night. All uncertainties are  $1\sigma$ .

| altitude<br>(km) | mean target<br>(pptv) | interf<br>(pptv) | ILS<br>(pptv) | shift<br>(pptv) | offset<br>(pptv) | gain<br>(pptv) | spectro<br>(pptv) | T+LOS<br>(pptv) | noise<br>(pptv) | random<br>(pptv) | syst<br>(pptv) | total<br>(pptv) |
|------------------|-----------------------|------------------|---------------|-----------------|------------------|----------------|-------------------|-----------------|-----------------|------------------|----------------|-----------------|
| 17               | 342.28                | 0.57             | 2.45          | 0.23            | 9.07             | 4.22           | 23.50             | 3.86            | 20.69           | 23.37            | 23.57          | 33.19           |
| 20               | 267.90                | 0.51             | 2.98          | 0.13            | 1.52             | 3.73           | 21.58             | 3.02            | 10.16           | 11.10            | 21.91          | 24.56           |
| 23               | 150.67                | 0.48             | 2.30          | 0.05            | 3.02             | 2.47           | 17.03             | 2.83            | 16.81           | 17.54            | 17.14          | 24.52           |
| 26               | 77.89                 | 0.49             | 1.52          | 0.08            | 4.76             | 1.16           | 8.73              | 1.47            | 22.94           | 23.64            | 8.51           | 25.13           |
| 29               | 32.88                 | 0.44             | 0.91          | 0.17            | 7.54             | 0.56           | 4.91              | 0.44            | 28.10           | 29.17            | 4.59           | 29.53           |
| 32               | -0.94                 | 0.29             | 0.38          | 0.11            | 8.51             | 0.21           | 2.43              | 0.14            | 32.39           | 33.52            | 1.89           | 33.58           |
| 35               | -14.05                | 0.11             | 0.28          | 0.23            | 5.35             | 0.14           | 1.34              | 0.09            | 33.94           | 34.39            | 0.44           | 34.39           |
| 38               | -2.97                 | 0.08             | 0.25          | 0.36            | 4.76             | 0.22           | 1.24              | 0.08            | 37.24           | 37.57            | 0.63           | 37.57           |
| 41               | 3.80                  | 0.08             | 0.38          | 0.44            | 6.33             | 0.29           | 1.76              | 0.08            | 41.00           | 41.51            | 1.09           | 41.53           |
| 44               | 1.18                  | 0.08             | 0.46          | 0.47            | 10.27            | 0.30           | 2.07              | 0.09            | 44.09           | 45.31            | 1.23           | 45.33           |
| 47               | -1.18                 | 0.12             | 0.41          | 0.46            | 17.52            | 0.31           | 2.00              | 0.10            | 47.94           | 51.07            | 1.14           | 51.08           |
| 50               | -3.07                 | 0.16             | 0.32          | 0.42            | 28.02            | 0.34           | 2.07              | 0.09            | 55.60           | 62.29            | 1.19           | 62.30           |

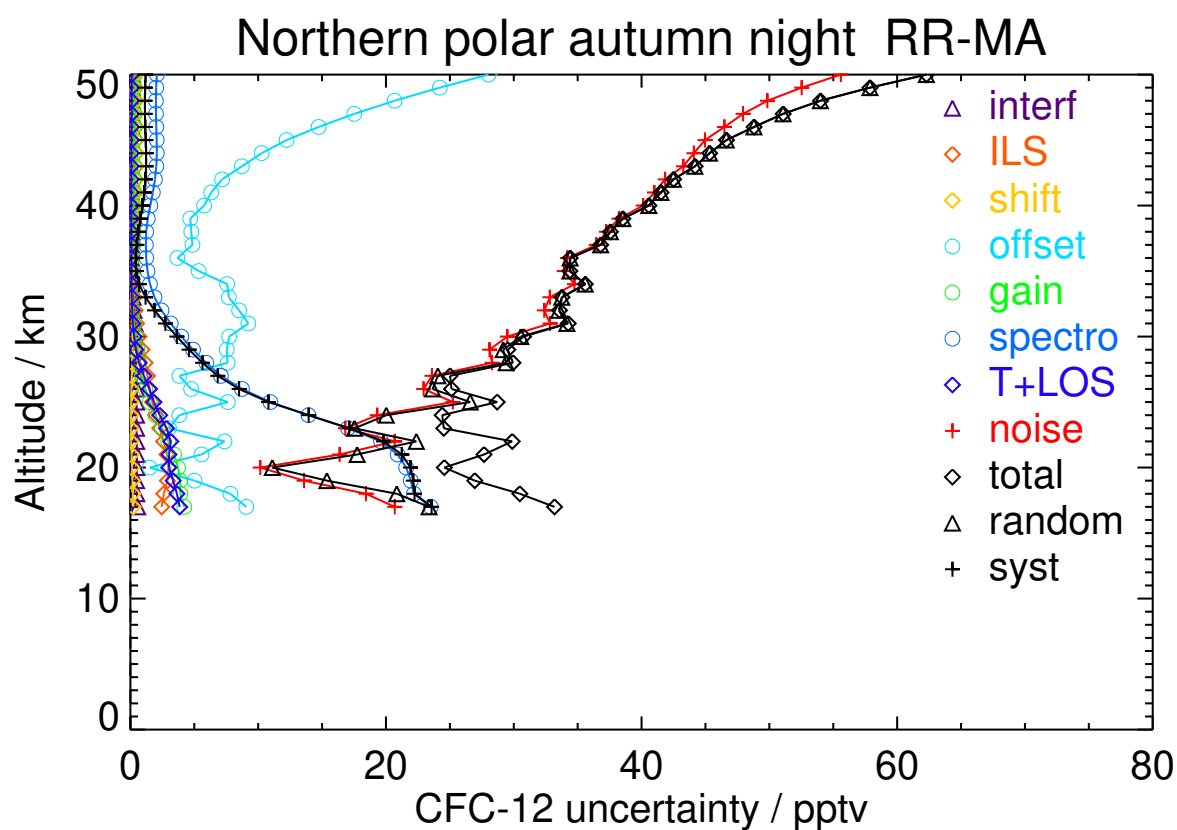

**Figure S76.** V8R\_F-12\_561 Northern polar autumn night

**Table S78.** CFC-12 error budget for Northern midlatitude winter day. All uncertainties are  $1\sigma$ .

| altitude<br>(km) | mean target<br>(pptv) | interf<br>(pptv) | ILS<br>(pptv) | shift<br>(pptv) | offset<br>(pptv) | gain<br>(pptv) | spectro<br>(pptv) | T+LOS<br>(pptv) | noise<br>(pptv) | random<br>(pptv) | syst<br>(pptv) | total<br>(pptv) |
|------------------|-----------------------|------------------|---------------|-----------------|------------------|----------------|-------------------|-----------------|-----------------|------------------|----------------|-----------------|
| 14               | 439.35                | 1.53             | 1.51          | 0.34            | 8.21             | 7.20           | 27.97             | 3.86            | 16.63           | 19.05            | 28.90          | 34.61           |
| 17               | 431.66                | 0.66             | 2.58          | 0.17            | 2.64             | 6.26           | 30.23             | 3.01            | 9.41            | 11.79            | 30.42          | 32.63           |
| 20               | 304.70                | 0.52             | 1.85          | 0.23            | 3.61             | 4.97           | 26.61             | 3.19            | 12.92           | 15.13            | 26.41          | 30.44           |
| 23               | 201.02                | 0.57             | 1.82          | 0.22            | 4.57             | 2.72           | 16.76             | 2.73            | 16.99           | 19.16            | 15.55          | 24.67           |
| 26               | 153.85                | 0.59             | 1.79          | 0.16            | 6.20             | 1.76           | 12.28             | 1.65            | 20.82           | 22.26            | 11.68          | 25.14           |
| 29               | 99.94                 | 0.54             | 1.62          | 0.29            | 7.36             | 1.39           | 9.78              | 0.85            | 25.24           | 26.64            | 9.10           | 28.16           |
| 32               | 45.88                 | 0.16             | 1.06          | 0.32            | 5.20             | 0.52           | 5.73              | 0.35            | 25.49           | 26.21            | 4.94           | 26.67           |
| 35               | 20.60                 | 0.09             | 0.47          | 0.36            | 4.65             | 0.37           | 3.26              | 0.25            | 29.21           | 29.67            | 2.49           | 29.77           |
| 38               | -5.10                 | 0.10             | 0.31          | 0.44            | 4.42             | 0.36           | 2.21              | 0.21            | 33.16           | 33.49            | 1.64           | 33.53           |
| 41               | -7.42                 | 0.09             | 0.36          | 0.54            | 5.21             | 0.38           | 1.59              | 0.15            | 36.95           | 37.34            | 1.21           | 37.36           |
| 44               | -2.84                 | 0.08             | 0.41          | 0.57            | 8.49             | 0.39           | 1.43              | 0.09            | 40.59           | 41.49            | 1.10           | 41.50           |
| 47               | -6.49                 | 0.11             | 0.39          | 0.52            | 15.59            | 0.37           | 1.54              | 0.07            | 45.02           | 47.66            | 1.00           | 47.67           |
| 50               | -9.65                 | 0.15             | 0.29          | 0.44            | 26.52            | 0.31           | 1.68              | 0.07            | 53.42           | 59.66            | 0.96           | 59.67           |

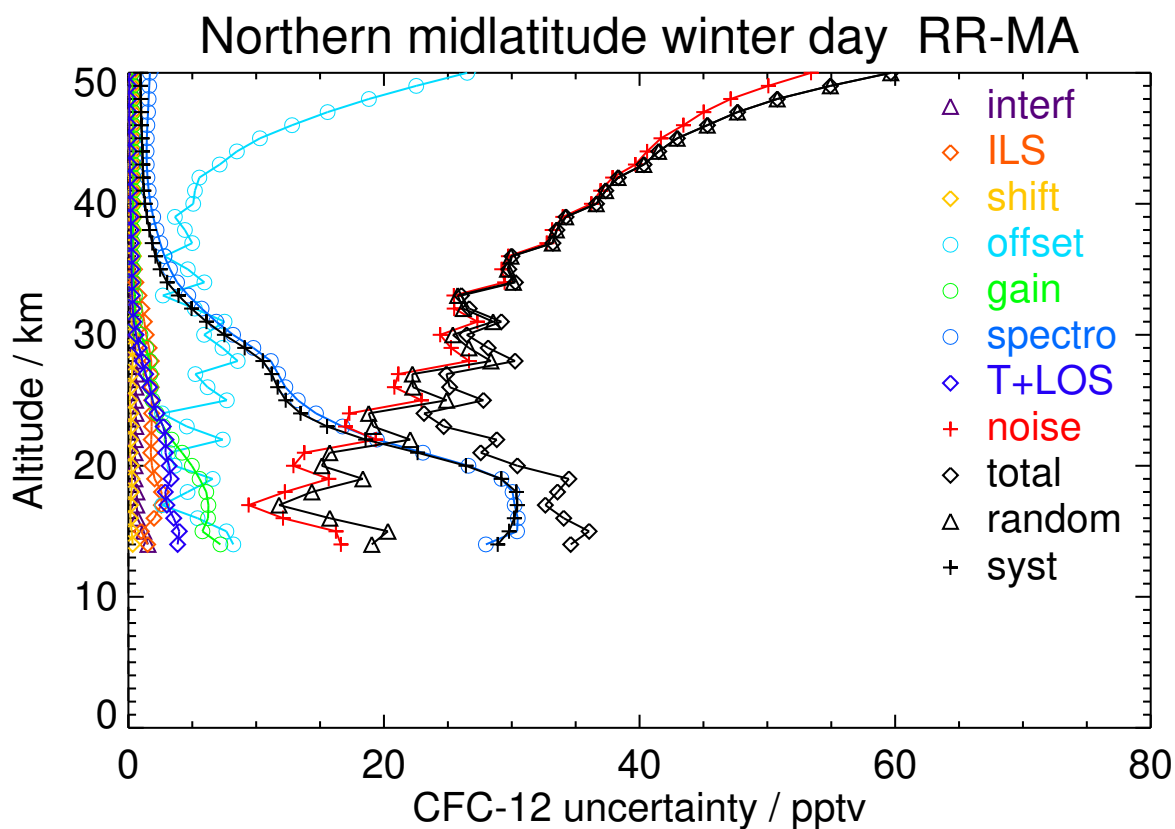

**Figure S77.** V8R\_F-12\_561 Northern midlatitude winter day

**Table S79.** CFC-12 error budget for Northern midlatitude winter night. All uncertainties are  $1\sigma$ .

| altitude<br>(km) | mean target<br>(pptv) | interf<br>(pptv) | ILS<br>(pptv) | shift<br>(pptv) | offset<br>(pptv) | gain<br>(pptv) | spectro<br>(pptv) | T+LOS<br>(pptv) | noise<br>(pptv) | random<br>(pptv) | syst<br>(pptv) | total<br>(pptv) |
|------------------|-----------------------|------------------|---------------|-----------------|------------------|----------------|-------------------|-----------------|-----------------|------------------|----------------|-----------------|
| 17               | 370.06                | 0.57             | 2.46          | 0.15            | 5.56             | 4.84           | 24.51             | 3.32            | 13.00           | 16.80            | 23.65          | 29.01           |
| 20               | 290.09                | 0.53             | 2.77          | 0.18            | 5.36             | 4.18           | 23.08             | 3.23            | 14.45           | 17.28            | 22.52          | 28.39           |
| 23               | 202.09                | 0.55             | 2.07          | 0.16            | 6.06             | 2.65           | 16.61             | 2.74            | 18.59           | 20.91            | 15.49          | 26.02           |
| 26               | 151.13                | 0.59             | 2.28          | 0.16            | 6.71             | 1.91           | 12.42             | 1.63            | 22.52           | 24.03            | 11.87          | 26.80           |
| 29               | 96.02                 | 0.58             | 1.93          | 0.37            | 8.09             | 1.34           | 9.35              | 0.87            | 26.66           | 28.17            | 8.76           | 29.50           |
| 32               | 57.97                 | 0.22             | 1.20          | 0.27            | 7.09             | 0.50           | 6.11              | 0.36            | 27.85           | 28.92            | 5.39           | 29.41           |
| 35               | 18.91                 | 0.10             | 0.61          | 0.39            | 5.30             | 0.41           | 3.61              | 0.26            | 29.90           | 30.44            | 3.05           | 30.60           |
| 38               | -2.73                 | 0.12             | 0.30          | 0.47            | 4.72             | 0.46           | 2.05              | 0.23            | 33.17           | 33.54            | 1.63           | 33.58           |
| 41               | 5.23                  | 0.11             | 0.33          | 0.57            | 5.15             | 0.51           | 1.74              | 0.17            | 36.51           | 36.90            | 1.48           | 36.93           |
| 44               | 1.32                  | 0.09             | 0.44          | 0.59            | 7.93             | 0.48           | 1.75              | 0.11            | 39.72           | 40.52            | 1.51           | 40.55           |
| 47               | -9.35                 | 0.11             | 0.43          | 0.55            | 14.41            | 0.37           | 1.53              | 0.07            | 43.76           | 46.09            | 1.12           | 46.11           |
| 50               | -11.00                | 0.15             | 0.32          | 0.49            | 25.16            | 0.28           | 1.51              | 0.07            | 52.08           | 57.86            | 0.85           | 57.87           |

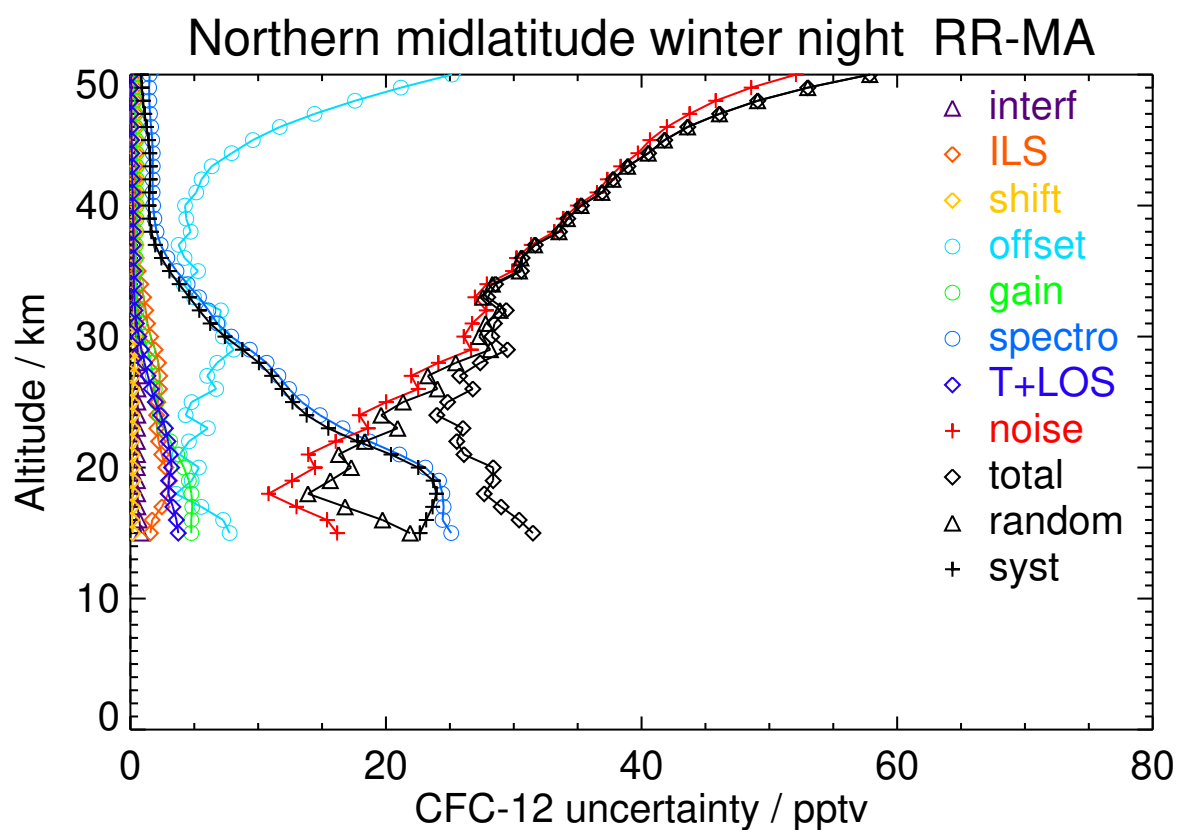

**Figure S78.** V8R\_F-12\_561 Northern midlatitude winter night

**Table S80.** CFC-12 error budget for Northern midlatitude spring day. All uncertainties are  $1\sigma$ .

| altitude<br>(km) | mean target<br>(pptv) | interf<br>(pptv) | ILS<br>(pptv) | shift<br>(pptv) | offset<br>(pptv) | gain<br>(pptv) | spectro<br>(pptv) | T+LOS<br>(pptv) | noise<br>(pptv) | random<br>(pptv) | syst<br>(pptv) | total<br>(pptv) |
|------------------|-----------------------|------------------|---------------|-----------------|------------------|----------------|-------------------|-----------------|-----------------|------------------|----------------|-----------------|
| 17               | 415.56                | 0.75             | 2.86          | 0.22            | 9.03             | 5.07           | 28.15             | 4.37            | 20.30           | 23.35            | 28.18          | 36.60           |
| 20               | 336.35                | 0.57             | 3.94          | 0.10            | 2.32             | 4.47           | 25.69             | 3.34            | 10.70           | 12.09            | 26.09          | 28.76           |
| 23               | 213.87                | 0.56             | 2.71          | 0.12            | 1.48             | 2.66           | 17.68             | 3.23            | 14.86           | 15.78            | 17.66          | 23.68           |
| 26               | 169.62                | 0.60             | 2.06          | 0.08            | 2.65             | 1.71           | 11.45             | 1.67            | 19.53           | 20.04            | 11.32          | 23.02           |
| 29               | 124.44                | 0.65             | 2.67          | 0.47            | 6.00             | 1.38           | 10.85             | 0.71            | 23.62           | 24.68            | 10.62          | 26.87           |
| 32               | 53.74                 | 0.39             | 1.60          | 0.32            | 6.54             | 0.63           | 6.72              | 0.35            | 26.55           | 27.50            | 6.32           | 28.22           |
| 35               | 5.90                  | 0.11             | 0.65          | 0.46            | 2.51             | 0.62           | 3.00              | 0.32            | 25.87           | 26.07            | 2.45           | 26.18           |
| 38               | -3.75                 | 0.14             | 0.12          | 0.51            | 2.88             | 0.58           | 1.68              | 0.28            | 29.38           | 29.54            | 1.44           | 29.58           |
| 41               | -9.11                 | 0.15             | 0.21          | 0.58            | 3.33             | 0.55           | 1.82              | 0.23            | 32.58           | 32.77            | 1.61           | 32.81           |
| 44               | -7.09                 | 0.13             | 0.33          | 0.60            | 4.96             | 0.47           | 1.41              | 0.13            | 36.30           | 36.65            | 1.24           | 36.67           |
| 47               | 0.68                  | 0.10             | 0.34          | 0.55            | 9.35             | 0.41           | 1.42              | 0.10            | 40.20           | 41.29            | 1.00           | 41.30           |
| 50               | 13.42                 | 0.13             | 0.25          | 0.46            | 17.75            | 0.40           | 1.81              | 0.10            | 46.19           | 49.50            | 1.25           | 49.52           |

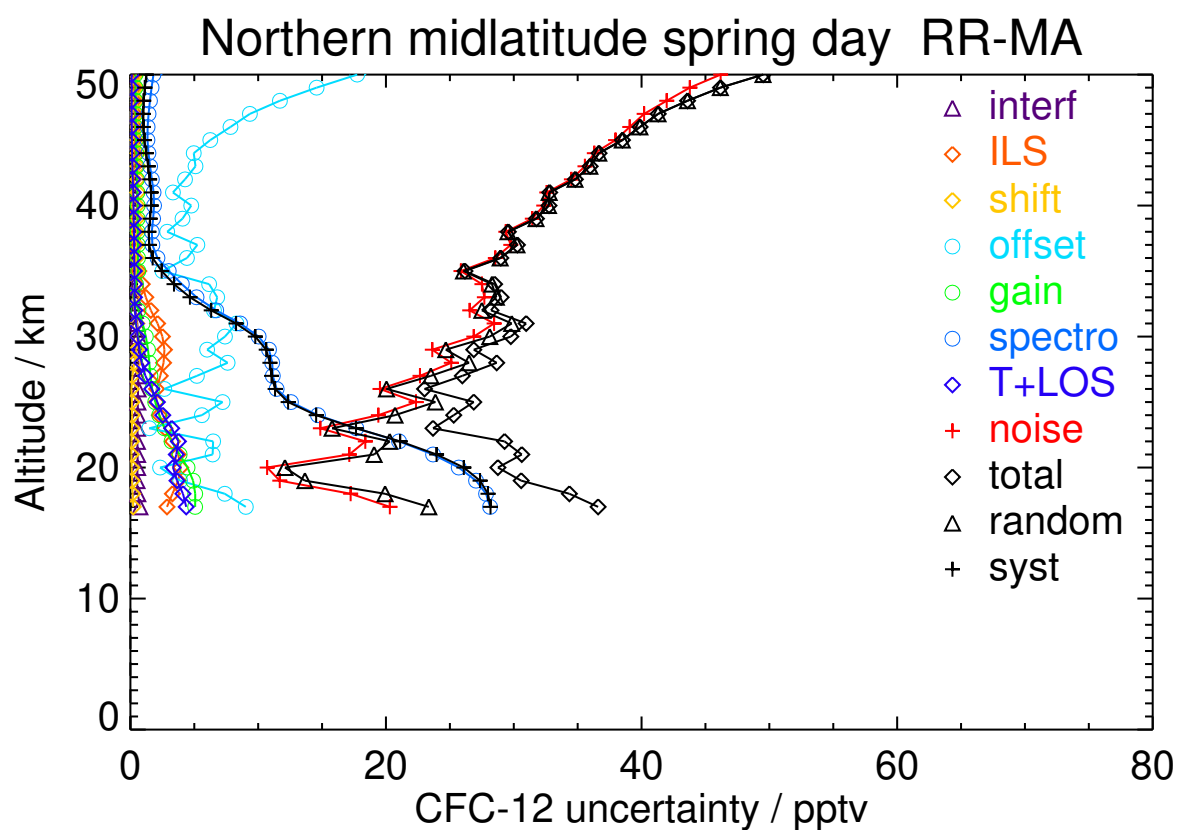

**Figure S79.** V8R\_F-12\_561 Northern midlatitude spring day

**Table S81.** CFC-12 error budget for Northern midlatitude spring night. All uncertainties are  $1\sigma$ .

| altitude<br>(km) | mean target<br>(pptv) | interf<br>(pptv) | ILS<br>(pptv) | shift<br>(pptv) | offset<br>(pptv) | gain<br>(pptv) | spectro<br>(pptv) | T+LOS<br>(pptv) | noise<br>(pptv) | random<br>(pptv) | syst<br>(pptv) | total<br>(pptv) |
|------------------|-----------------------|------------------|---------------|-----------------|------------------|----------------|-------------------|-----------------|-----------------|------------------|----------------|-----------------|
| 17               | 400.88                | 0.70             | 2.86          | 0.20            | 8.72             | 4.93           | 26.60             | 4.17            | 19.44           | 22.54            | 26.53          | 34.81           |
| 20               | 326.46                | 0.56             | 3.92          | 0.10            | 2.20             | 4.65           | 23.94             | 3.23            | 10.44           | 11.93            | 24.35          | 27.11           |
| 23               | 211.69                | 0.55             | 2.61          | 0.10            | 1.87             | 2.79           | 17.78             | 3.18            | 14.82           | 15.66            | 17.85          | 23.75           |
| 26               | 156.70                | 0.58             | 2.28          | 0.09            | 3.12             | 1.69           | 12.17             | 1.69            | 20.06           | 20.70            | 11.95          | 23.91           |
| 29               | 96.69                 | 0.61             | 2.21          | 0.41            | 6.37             | 1.15           | 9.39              | 0.73            | 24.38           | 25.36            | 9.34           | 27.02           |
| 32               | 48.69                 | 0.39             | 1.09          | 0.26            | 7.06             | 0.51           | 5.33              | 0.37            | 27.79           | 28.77            | 4.94           | 29.19           |
| 35               | 12.15                 | 0.11             | 0.65          | 0.43            | 3.28             | 0.58           | 3.07              | 0.32            | 27.08           | 27.35            | 2.52           | 27.47           |
| 38               | -1.53                 | 0.14             | 0.22          | 0.51            | 3.43             | 0.57           | 1.91              | 0.28            | 30.36           | 30.58            | 1.56           | 30.62           |
| 41               | -3.76                 | 0.15             | 0.27          | 0.59            | 3.68             | 0.56           | 1.92              | 0.22            | 33.59           | 33.82            | 1.73           | 33.86           |
| 44               | -11.53                | 0.12             | 0.38          | 0.59            | 5.35             | 0.47           | 1.65              | 0.14            | 37.05           | 37.45            | 1.42           | 37.48           |
| 47               | 0.08                  | 0.11             | 0.36          | 0.55            | 9.69             | 0.38           | 1.15              | 0.12            | 40.81           | 41.96            | 0.93           | 41.97           |
| 50               | 4.24                  | 0.14             | 0.27          | 0.48            | 17.92            | 0.31           | 1.10              | 0.11            | 46.63           | 49.96            | 0.76           | 49.97           |

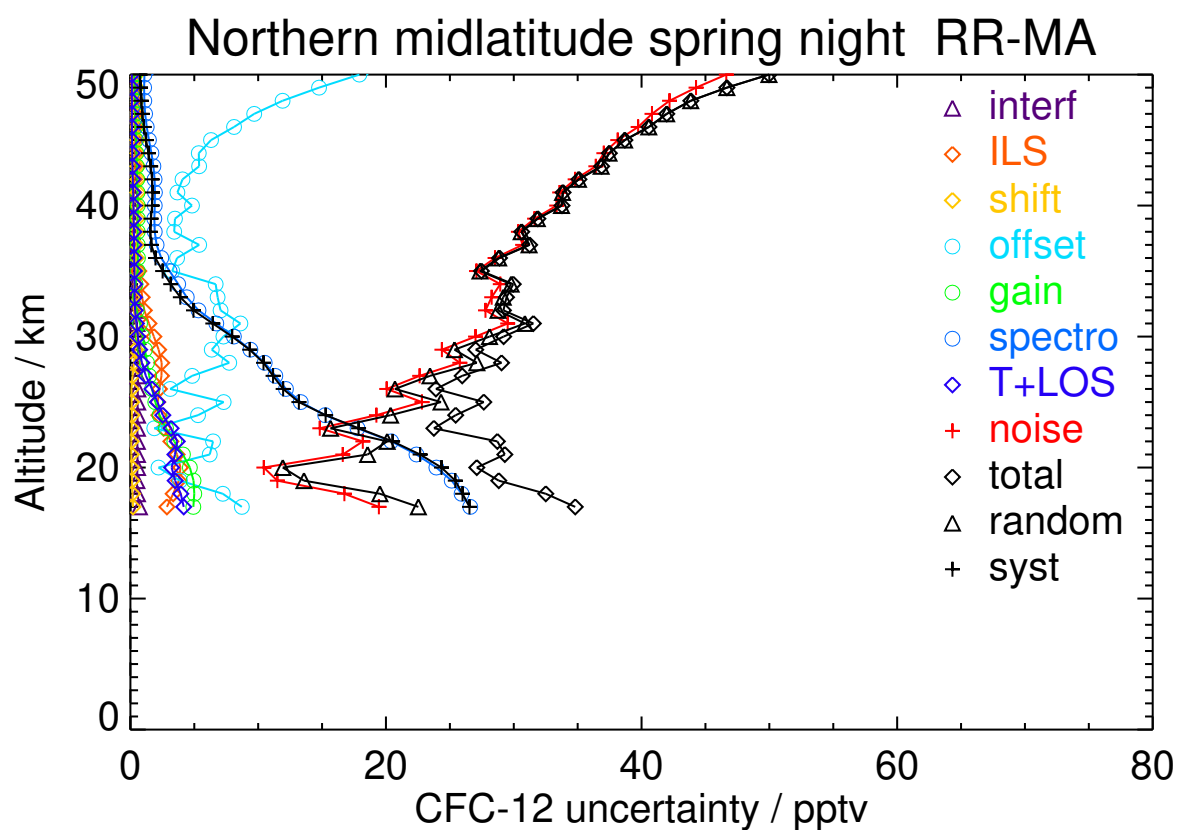

**Figure S80.** V8R\_F-12\_561 Northern midlatitude spring night

**Table S82.** CFC-12 error budget for Northern midlatitude summer day. All uncertainties are  $1\sigma$ .

| altitude<br>(km) | mean target<br>(pptv) | interf<br>(pptv) | ILS<br>(pptv) | shift<br>(pptv) | offset<br>(pptv) | gain<br>(pptv) | spectro<br>(pptv) | T+LOS<br>(pptv) | noise<br>(pptv) | random<br>(pptv) | syst<br>(pptv) | total<br>(pptv) |
|------------------|-----------------------|------------------|---------------|-----------------|------------------|----------------|-------------------|-----------------|-----------------|------------------|----------------|-----------------|
| 17               | 446.15                | 0.96             | 2.19          | 0.13            | 8.43             | 5.80           | 29.67             | 4.30            | 18.57           | 21.52            | 29.85          | 36.80           |
| 20               | 356.49                | 0.67             | 3.18          | 0.10            | 2.12             | 5.16           | 26.55             | 2.95            | 9.62            | 10.67            | 27.09          | 29.11           |
| 23               | 223.57                | 0.61             | 1.93          | 0.11            | 1.40             | 3.26           | 18.35             | 2.87            | 13.04           | 13.75            | 18.51          | 23.06           |
| 26               | 166.50                | 0.67             | 2.41          | 0.12            | 2.26             | 1.84           | 12.31             | 2.09            | 17.48           | 17.92            | 12.45          | 21.82           |
| 29               | 88.03                 | 0.71             | 2.47          | 0.41            | 5.39             | 1.07           | 9.49              | 1.17            | 21.00           | 21.89            | 9.50           | 23.86           |
| 32               | 39.66                 | 0.43             | 0.95          | 0.26            | 6.23             | 0.43           | 4.28              | 0.44            | 24.46           | 25.35            | 3.81           | 25.63           |
| 35               | 12.74                 | 0.13             | 0.62          | 0.45            | 2.69             | 0.69           | 2.73              | 0.31            | 23.85           | 24.07            | 2.26           | 24.18           |
| 38               | -10.16                | 0.15             | 0.12          | 0.49            | 3.11             | 0.57           | 1.83              | 0.28            | 27.34           | 27.55            | 1.52           | 27.59           |
| 41               | -8.24                 | 0.16             | 0.14          | 0.52            | 3.32             | 0.60           | 1.64              | 0.23            | 30.63           | 30.83            | 1.55           | 30.86           |
| 44               | 2.00                  | 0.15             | 0.31          | 0.56            | 4.07             | 0.57           | 1.60              | 0.15            | 34.14           | 34.40            | 1.51           | 34.43           |
| 47               | -1.42                 | 0.12             | 0.35          | 0.55            | 6.66             | 0.47           | 1.39              | 0.11            | 37.77           | 38.37            | 1.19           | 38.39           |
| 50               | 0.16                  | 0.13             | 0.30          | 0.48            | 12.81            | 0.41           | 1.32              | 0.13            | 42.03           | 43.95            | 0.93           | 43.96           |

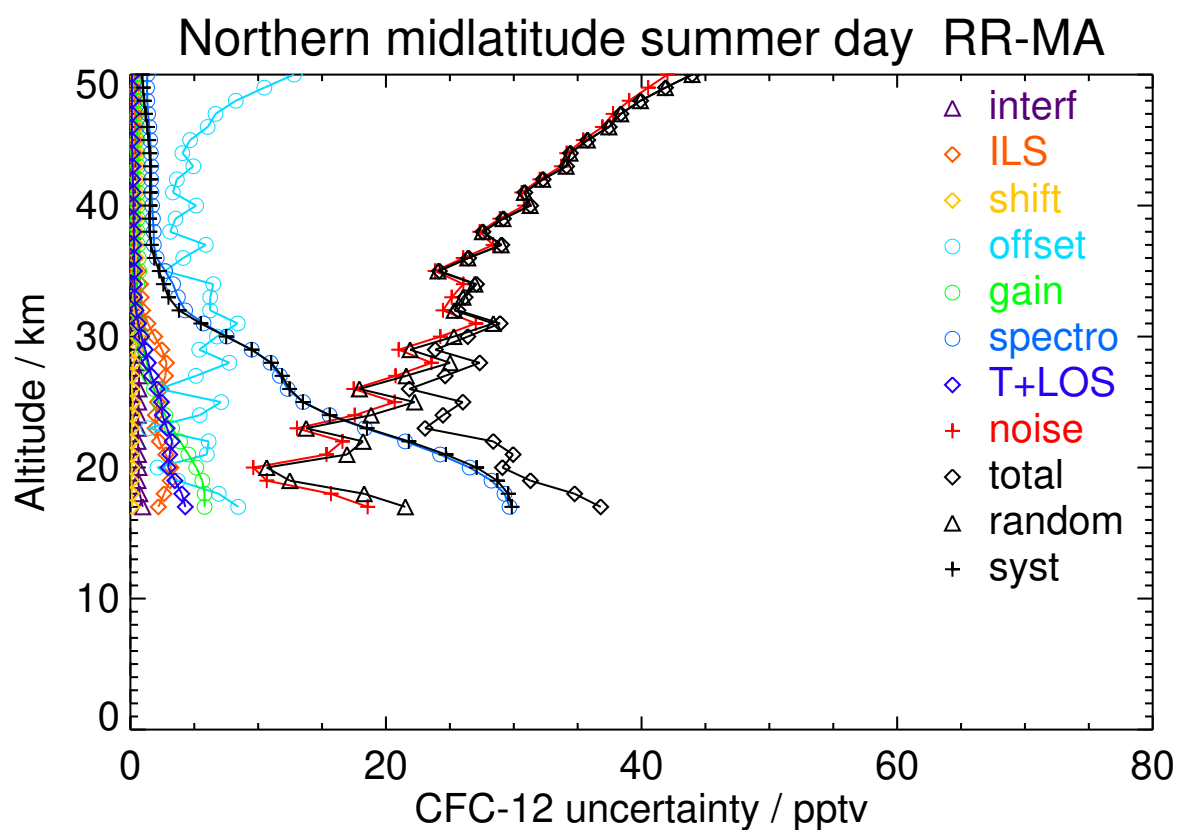

**Figure S81.** V8R\_F-12\_561 Northern midlatitude summer day

**Table S83.** CFC-12 error budget for Northern midlatitude summer night. All uncertainties are  $1\sigma$ .

| altitude<br>(km) | mean target<br>(pptv) | interf<br>(pptv) | ILS<br>(pptv) | shift<br>(pptv) | offset<br>(pptv) | gain<br>(pptv) | spectro<br>(pptv) | T+LOS<br>(pptv) | noise<br>(pptv) | random<br>(pptv) | syst<br>(pptv) | total<br>(pptv) |
|------------------|-----------------------|------------------|---------------|-----------------|------------------|----------------|-------------------|-----------------|-----------------|------------------|----------------|-----------------|
| 17               | 437.43                | 0.88             | 2.05          | 0.13            | 8.19             | 5.28           | 27.09             | 4.14            | 18.13           | 20.92            | 27.25          | 34.35           |
| 20               | 360.96                | 0.65             | 3.07          | 0.10            | 1.87             | 4.71           | 25.39             | 2.92            | 9.24            | 10.27            | 25.86          | 27.83           |
| 23               | 228.04                | 0.61             | 2.12          | 0.11            | 1.69             | 3.33           | 18.89             | 2.88            | 13.04           | 13.68            | 19.15          | 23.53           |
| 26               | 160.30                | 0.67             | 2.41          | 0.16            | 2.73             | 2.06           | 11.85             | 2.08            | 17.33           | 17.84            | 12.04          | 21.52           |
| 29               | 93.65                 | 0.71             | 2.13          | 0.38            | 5.54             | 0.81           | 8.68              | 1.15            | 21.14           | 21.96            | 8.82           | 23.66           |
| 32               | 47.06                 | 0.46             | 1.02          | 0.30            | 6.40             | 0.44           | 4.73              | 0.43            | 24.67           | 25.55            | 4.56           | 25.95           |
| 35               | 4.32                  | 0.13             | 0.61          | 0.44            | 3.15             | 0.65           | 2.58              | 0.32            | 23.71           | 23.98            | 2.21           | 24.08           |
| 38               | -4.56                 | 0.15             | 0.10          | 0.47            | 3.43             | 0.59           | 1.50              | 0.28            | 27.13           | 27.37            | 1.18           | 27.40           |
| 41               | -1.86                 | 0.17             | 0.14          | 0.51            | 3.60             | 0.66           | 1.91              | 0.24            | 30.31           | 30.55            | 1.71           | 30.60           |
| 44               | -1.83                 | 0.15             | 0.34          | 0.57            | 3.99             | 0.64           | 1.83              | 0.15            | 33.57           | 33.83            | 1.64           | 33.87           |
| 47               | -6.70                 | 0.12             | 0.37          | 0.57            | 6.31             | 0.54           | 1.58              | 0.13            | 37.09           | 37.64            | 1.29           | 37.66           |
| 50               | -9.34                 | 0.13             | 0.33          | 0.51            | 11.89            | 0.44           | 1.31              | 0.15            | 41.33           | 43.02            | 0.92           | 43.03           |

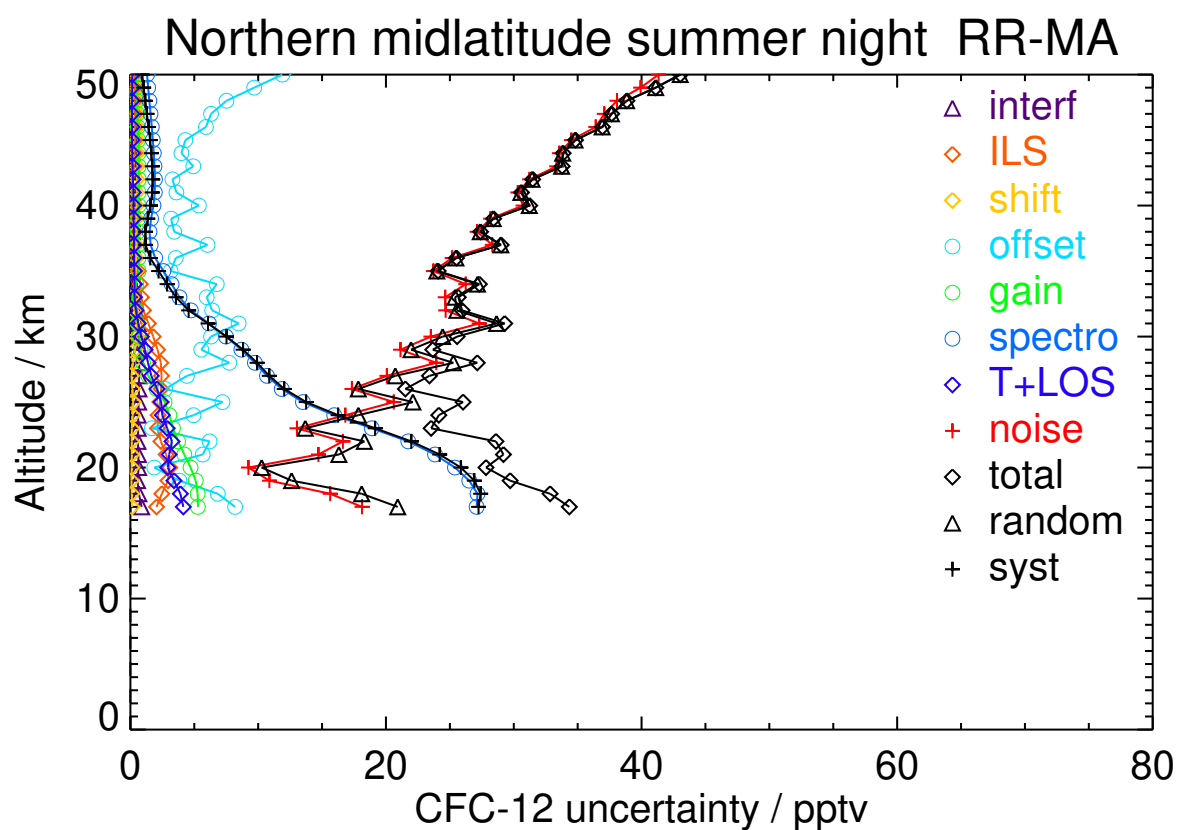

**Figure S82.** V8R\_F-12\_561 Northern midlatitude summer night

**Table S84.** CFC-12 error budget for Northern midlatitude autumn day. All uncertainties are  $1\sigma$ .

| altitude<br>(km) | mean target<br>(pptv) | interf<br>(pptv) | ILS<br>(pptv) | shift<br>(pptv) | offset<br>(pptv) | gain<br>(pptv) | spectro<br>(pptv) | T+LOS<br>(pptv) | noise<br>(pptv) | random<br>(pptv) | syst<br>(pptv) | total<br>(pptv) |
|------------------|-----------------------|------------------|---------------|-----------------|------------------|----------------|-------------------|-----------------|-----------------|------------------|----------------|-----------------|
| 17               | 428.78                | 0.75             | 2.60          | 0.20            | 9.20             | 4.96           | 28.16             | 4.26            | 20.50           | 23.78            | 27.98          | 36.72           |
| 20               | 361.18                | 0.54             | 3.53          | 0.14            | 1.82             | 4.42           | 25.88             | 3.14            | 10.22           | 12.22            | 25.89          | 28.63           |
| 23               | 249.30                | 0.52             | 2.89          | 0.11            | 2.44             | 3.18           | 21.55             | 3.04            | 15.35           | 16.86            | 21.21          | 27.09           |
| 26               | 161.56                | 0.56             | 2.61          | 0.09            | 3.67             | 1.92           | 14.71             | 1.90            | 20.52           | 21.34            | 14.48          | 25.79           |
| 29               | 78.53                 | 0.57             | 2.09          | 0.37            | 6.53             | 1.22           | 9.23              | 1.17            | 24.65           | 25.80            | 8.80           | 27.26           |
| 32               | 35.71                 | 0.36             | 0.91          | 0.21            | 7.17             | 0.48           | 4.52              | 0.59            | 28.18           | 29.23            | 3.61           | 29.45           |
| 35               | 21.84                 | 0.10             | 0.57          | 0.39            | 3.47             | 0.52           | 2.90              | 0.32            | 28.03           | 28.34            | 2.04           | 28.41           |
| 38               | 10.99                 | 0.12             | 0.34          | 0.48            | 3.55             | 0.49           | 2.41              | 0.25            | 31.79           | 32.03            | 1.89           | 32.09           |
| 41               | 5.45                  | 0.13             | 0.35          | 0.56            | 4.05             | 0.48           | 2.17              | 0.20            | 35.38           | 35.64            | 1.86           | 35.69           |
| 44               | 4.61                  | 0.10             | 0.44          | 0.59            | 6.57             | 0.41           | 1.91              | 0.13            | 38.87           | 39.44            | 1.55           | 39.47           |
| 47               | -1.52                 | 0.10             | 0.42          | 0.54            | 12.53            | 0.35           | 1.64              | 0.09            | 42.97           | 44.78            | 1.17           | 44.80           |
| 50               | -11.91                | 0.14             | 0.31          | 0.46            | 22.39            | 0.30           | 1.62              | 0.08            | 50.65           | 55.40            | 0.95           | 55.41           |

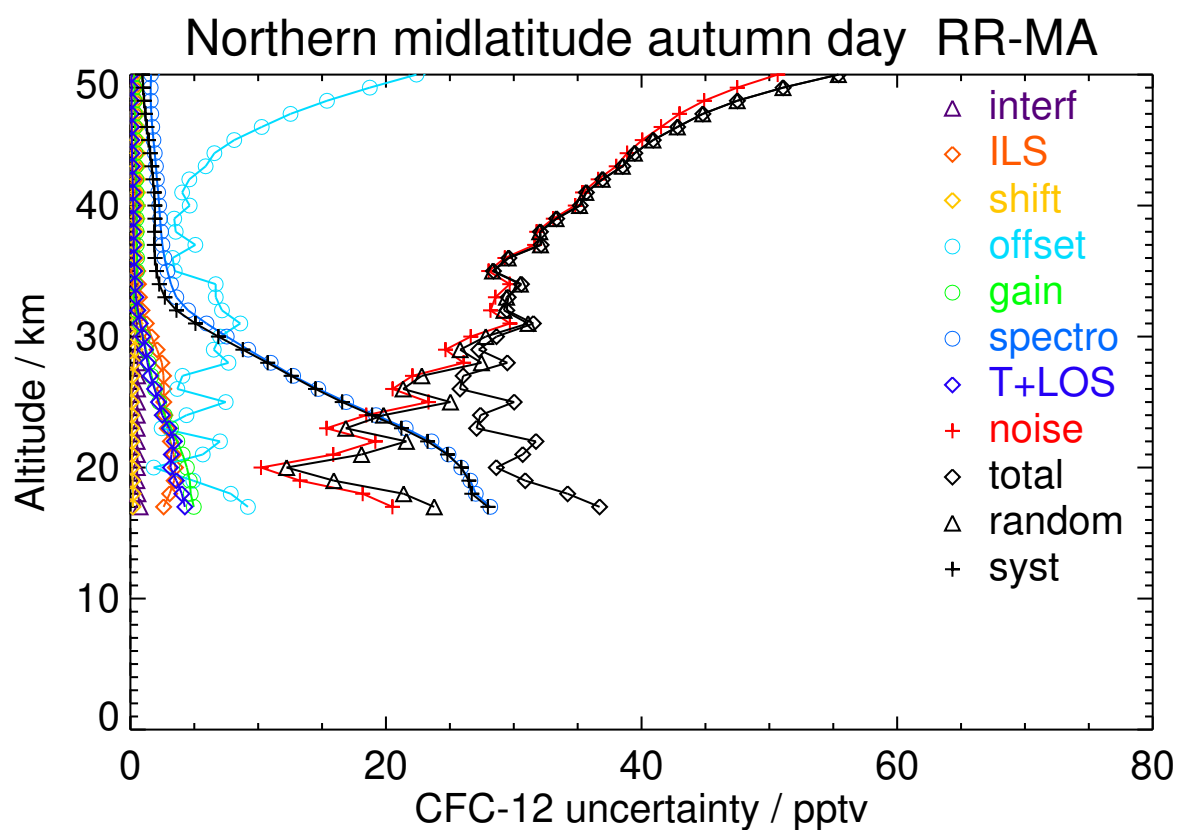

**Figure S83.** V8R\_F-12\_561 Northern midlatitude autumn day

**Table S85.** CFC-12 error budget for Northern midlatitude autumn night. All uncertainties are  $1\sigma$ .

| altitude<br>(km) | mean target<br>(pptv) | interf<br>(pptv) | ILS<br>(pptv) | shift<br>(pptv) | offset<br>(pptv) | gain<br>(pptv) | spectro<br>(pptv) | T+LOS<br>(pptv) | noise<br>(pptv) | random<br>(pptv) | syst<br>(pptv) | total<br>(pptv) |
|------------------|-----------------------|------------------|---------------|-----------------|------------------|----------------|-------------------|-----------------|-----------------|------------------|----------------|-----------------|
| 17               | 400.19                | 0.69             | 2.51          | 0.18            | 8.73             | 4.83           | 25.74             | 4.08            | 19.62           | 23.36            | 25.00          | 34.21           |
| 20               | 346.32                | 0.54             | 3.75          | 0.13            | 1.87             | 4.43           | 24.54             | 3.06            | 10.04           | 12.13            | 24.55          | 27.39           |
| 23               | 233.15                | 0.54             | 2.55          | 0.08            | 2.33             | 2.78           | 19.22             | 2.96            | 14.96           | 15.99            | 19.13          | 24.94           |
| 26               | 168.80                | 0.56             | 2.17          | 0.08            | 3.60             | 1.87           | 13.78             | 1.87            | 20.00           | 20.81            | 13.49          | 24.80           |
| 29               | 97.92                 | 0.57             | 2.11          | 0.35            | 6.44             | 1.29           | 9.80              | 1.16            | 24.40           | 25.55            | 9.39           | 27.22           |
| 32               | 59.97                 | 0.36             | 1.04          | 0.23            | 7.23             | 0.62           | 5.75              | 0.59            | 28.24           | 29.29            | 5.19           | 29.75           |
| 35               | 27.11                 | 0.10             | 0.84          | 0.37            | 3.76             | 0.48           | 4.31              | 0.32            | 28.15           | 28.54            | 3.39           | 28.74           |
| 38               | 3.17                  | 0.12             | 0.42          | 0.46            | 3.77             | 0.45           | 2.65              | 0.24            | 32.02           | 32.29            | 2.00           | 32.36           |
| 41               | -5.48                 | 0.12             | 0.34          | 0.55            | 4.35             | 0.45           | 1.93              | 0.20            | 35.57           | 35.86            | 1.61           | 35.89           |
| 44               | -15.03                | 0.09             | 0.39          | 0.59            | 6.90             | 0.37           | 1.62              | 0.13            | 39.19           | 39.81            | 1.26           | 39.83           |
| 47               | -12.62                | 0.10             | 0.38          | 0.56            | 13.02            | 0.30           | 1.37              | 0.08            | 43.36           | 45.29            | 0.89           | 45.30           |
| 50               | -11.54                | 0.14             | 0.31          | 0.50            | 23.09            | 0.26           | 1.42              | 0.07            | 51.38           | 56.35            | 0.78           | 56.35           |

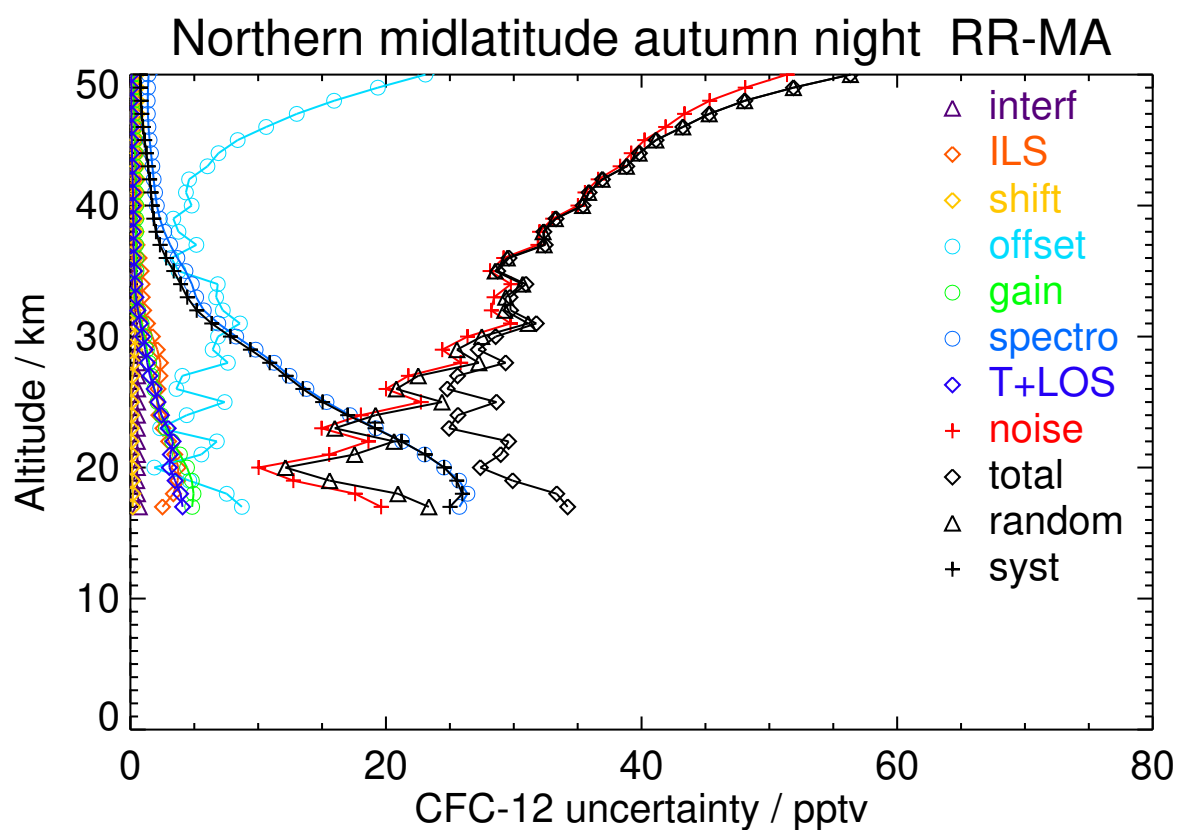

**Figure S84.** V8R\_F-12\_561 Northern midlatitude autumn night

**Table S86.** CFC-12 error budget for Tropics day. All uncertainties are  $1\sigma$ .

| altitude<br>(km) | mean target<br>(pptv) | interf<br>(pptv) | ILS<br>(pptv) | shift<br>(pptv) | offset<br>(pptv) | gain<br>(pptv) | spectro<br>(pptv) | T+LOS<br>(pptv) | noise<br>(pptv) | random<br>(pptv) | syst<br>(pptv) | total<br>(pptv) |
|------------------|-----------------------|------------------|---------------|-----------------|------------------|----------------|-------------------|-----------------|-----------------|------------------|----------------|-----------------|
| 17               | 543.51                | 1.85             | 5.29          | 0.46            | 12.01            | 7.47           | 31.73             | 8.43            | 28.48           | 33.38            | 31.73          | 46.05           |
| 20               | 492.96                | 0.64             | 5.71          | 0.21            | 2.25             | 6.06           | 30.69             | 5.14            | 13.70           | 15.67            | 31.39          | 35.08           |
| 23               | 383.83                | 0.56             | 4.74          | 0.33            | 2.69             | 3.09           | 27.13             | 3.86            | 17.32           | 18.48            | 27.36          | 33.02           |
| 26               | 335.92                | 0.62             | 4.50          | 0.17            | 3.07             | 2.98           | 20.81             | 2.41            | 20.16           | 21.27            | 20.78          | 29.73           |
| 29               | 283.84                | 0.69             | 5.15          | 0.61            | 5.94             | 2.76           | 19.16             | 1.66            | 23.16           | 24.45            | 19.45          | 31.25           |
| 32               | 208.44                | 0.42             | 3.91          | 0.67            | 6.47             | 1.56           | 15.00             | 1.15            | 25.80           | 26.90            | 15.11          | 30.85           |
| 35               | 106.99                | 0.12             | 2.19          | 0.58            | 2.48             | 1.11           | 10.83             | 0.89            | 25.20           | 25.57            | 10.57          | 27.67           |
| 38               | 27.91                 | 0.17             | 0.43          | 0.49            | 2.74             | 0.77           | 5.60              | 0.66            | 28.51           | 28.74            | 5.25           | 29.21           |
| 41               | -0.11                 | 0.15             | 0.11          | 0.54            | 3.11             | 0.66           | 2.54              | 0.44            | 31.55           | 31.74            | 2.27           | 31.82           |
| 44               | -5.72                 | 0.13             | 0.24          | 0.57            | 4.48             | 0.62           | 1.68              | 0.26            | 35.20           | 35.51            | 1.45           | 35.54           |
| 47               | -3.84                 | 0.10             | 0.28          | 0.54            | 8.39             | 0.51           | 1.39              | 0.17            | 39.08           | 39.99            | 1.05           | 40.01           |
| 50               | -4.82                 | 0.12             | 0.22          | 0.46            | 16.21            | 0.39           | 1.31              | 0.14            | 44.47           | 47.35            | 0.80           | 47.36           |

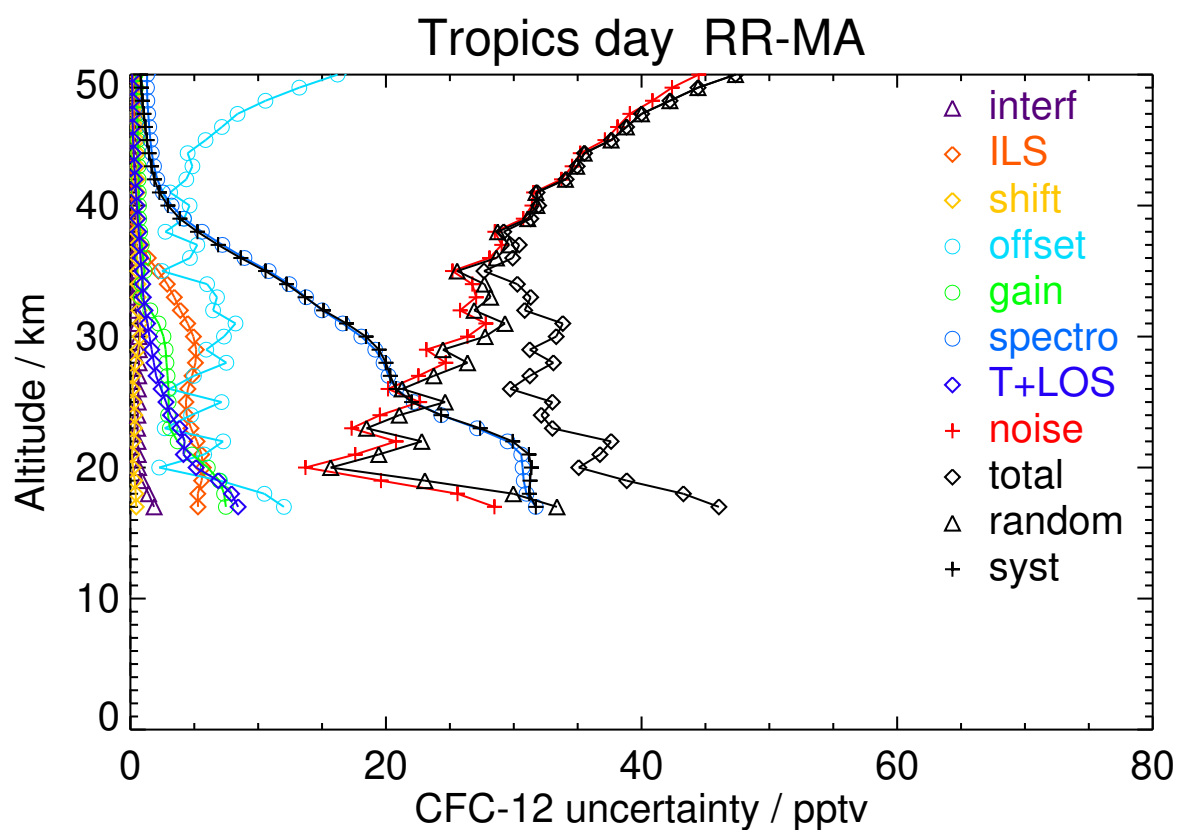

**Figure S85.** V8R\_F-12\_561 Tropics day

**Table S87.** CFC-12 error budget for Tropics night. All uncertainties are  $1\sigma$ .

| altitude<br>(km) | mean target<br>(pptv) | interf<br>(pptv) | ILS<br>(pptv) | shift<br>(pptv) | offset<br>(pptv) | gain<br>(pptv) | spectro<br>(pptv) | T+LOS<br>(pptv) | noise<br>(pptv) | random<br>(pptv) | syst<br>(pptv) | total<br>(pptv) |
|------------------|-----------------------|------------------|---------------|-----------------|------------------|----------------|-------------------|-----------------|-----------------|------------------|----------------|-----------------|
| 17               | 513.00                | 1.65             | 4.09          | 0.45            | 11.81            | 6.96           | 27.35             | 8.00            | 28.05           | 32.26            | 27.68          | 42.51           |
| 20               | 482.71                | 0.63             | 5.35          | 0.24            | 2.29             | 5.85           | 28.75             | 4.98            | 13.69           | 15.47            | 29.46          | 33.28           |
| 23               | 390.75                | 0.57             | 4.87          | 0.30            | 3.05             | 3.17           | 27.52             | 3.91            | 17.42           | 18.64            | 27.79          | 33.46           |
| 26               | 329.03                | 0.63             | 4.19          | 0.14            | 3.66             | 2.64           | 20.88             | 2.44            | 20.25           | 21.70            | 20.48          | 29.84           |
| 29               | 296.81                | 0.69             | 4.86          | 0.61            | 6.16             | 2.64           | 19.12             | 1.67            | 23.29           | 24.62            | 19.34          | 31.31           |
| 32               | 207.16                | 0.41             | 4.20          | 0.75            | 6.45             | 1.65           | 15.71             | 1.17            | 25.88           | 26.93            | 15.98          | 31.31           |
| 35               | 101.55                | 0.12             | 2.20          | 0.55            | 3.06             | 1.08           | 10.23             | 0.90            | 25.58           | 25.93            | 10.17          | 27.85           |
| 38               | 32.73                 | 0.17             | 0.49          | 0.49            | 3.28             | 0.78           | 5.39              | 0.66            | 28.94           | 29.22            | 5.00           | 29.65           |
| 41               | 2.05                  | 0.16             | 0.14          | 0.54            | 3.46             | 0.66           | 2.72              | 0.45            | 31.94           | 32.16            | 2.44           | 32.26           |
| 44               | -4.72                 | 0.13             | 0.26          | 0.56            | 4.64             | 0.63           | 1.83              | 0.26            | 35.30           | 35.63            | 1.55           | 35.66           |
| 47               | -6.73                 | 0.10             | 0.27          | 0.55            | 8.37             | 0.52           | 1.29              | 0.17            | 39.00           | 39.90            | 1.04           | 39.92           |
| 50               | -10.76                | 0.13             | 0.22          | 0.48            | 16.12            | 0.41           | 1.29              | 0.14            | 44.42           | 47.27            | 0.79           | 47.28           |

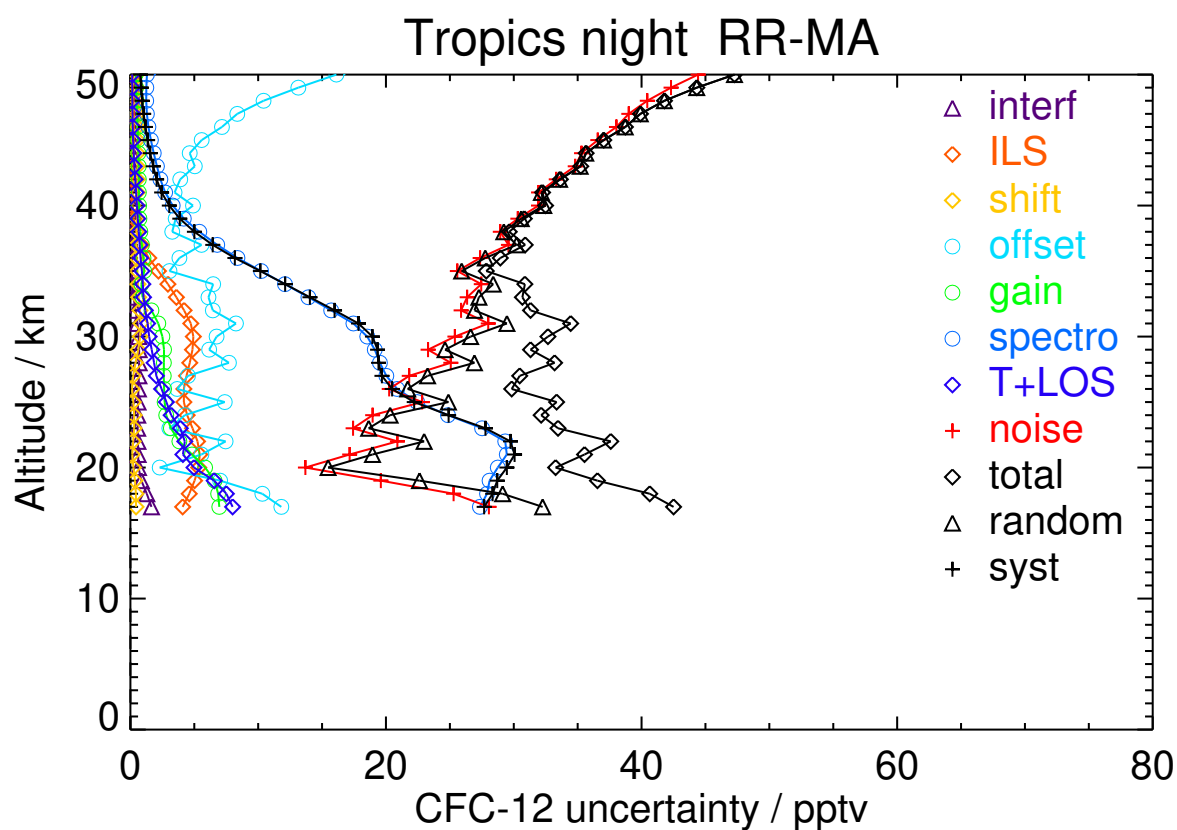

**Figure S86.** V8R\_F-12\_561 Tropics night

**Table S88.** CFC-12 error budget for Southern midlatitude winter day. All uncertainties are  $1\sigma$ .

| altitude<br>(km) | mean target<br>(pptv) | interf<br>(pptv) | ILS<br>(pptv) | shift<br>(pptv) | offset<br>(pptv) | gain<br>(pptv) | spectro<br>(pptv) | T+LOS<br>(pptv) | noise<br>(pptv) | random<br>(pptv) | syst<br>(pptv) | total<br>(pptv) |
|------------------|-----------------------|------------------|---------------|-----------------|------------------|----------------|-------------------|-----------------|-----------------|------------------|----------------|-----------------|
| 17               | 293.72                | 0.62             | 3.93          | 0.40            | 10.08            | 2.67           | 19.88             | 4.39            | 23.82           | 26.65            | 19.91          | 33.27           |
| 20               | 324.22                | 0.55             | 3.26          | 0.20            | 1.94             | 4.08           | 22.19             | 2.96            | 9.90            | 11.34            | 22.40          | 25.11           |
| 23               | 228.46                | 0.55             | 2.94          | 0.12            | 4.77             | 3.04           | 18.73             | 3.05            | 17.16           | 18.96            | 18.33          | 26.38           |
| 26               | 181.86                | 0.60             | 2.09          | 0.16            | 6.62             | 2.45           | 12.73             | 2.34            | 22.34           | 23.86            | 12.32          | 26.85           |
| 29               | 154.00                | 0.57             | 2.26          | 0.36            | 7.76             | 2.01           | 12.07             | 1.23            | 26.69           | 28.32            | 11.28          | 30.49           |
| 32               | 96.38                 | 0.21             | 2.10          | 0.41            | 6.23             | 0.94           | 10.35             | 0.44            | 27.57           | 28.75            | 9.21           | 30.19           |
| 35               | 27.22                 | 0.11             | 1.18          | 0.39            | 5.33             | 0.51           | 5.95              | 0.25            | 30.02           | 30.69            | 4.97           | 31.09           |
| 38               | -3.77                 | 0.14             | 0.51          | 0.47            | 4.79             | 0.49           | 2.73              | 0.21            | 33.06           | 33.47            | 1.96           | 33.53           |
| 41               | -5.56                 | 0.14             | 0.34          | 0.55            | 5.14             | 0.50           | 1.73              | 0.18            | 36.33           | 36.72            | 1.39           | 36.74           |
| 44               | -10.77                | 0.10             | 0.38          | 0.56            | 7.65             | 0.46           | 1.58              | 0.12            | 39.40           | 40.16            | 1.19           | 40.18           |
| 47               | -8.88                 | 0.11             | 0.36          | 0.51            | 13.67            | 0.39           | 1.40              | 0.08            | 43.30           | 45.43            | 0.86           | 45.43           |
| 50               | -8.03                 | 0.15             | 0.26          | 0.45            | 23.76            | 0.31           | 1.44              | 0.08            | 51.35           | 56.60            | 0.75           | 56.60           |

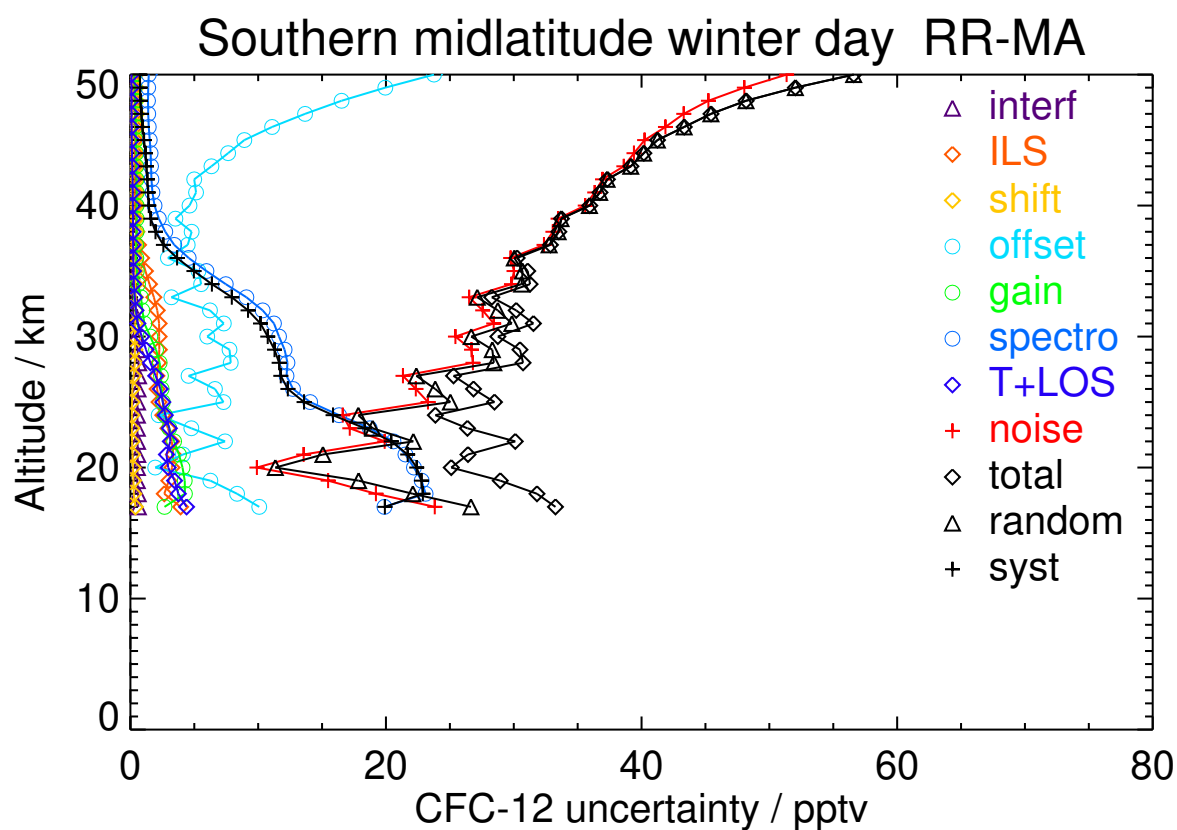

**Figure S87.** V8R\_F-12\_561 Southern midlatitude winter day

**Table S89.** CFC-12 error budget for Southern midlatitude winter night. All uncertainties are  $1\sigma$ .

| altitude<br>(km) | mean target<br>(pptv) | interf<br>(pptv) | ILS<br>(pptv) | shift<br>(pptv) | offset<br>(pptv) | gain<br>(pptv) | spectro<br>(pptv) | T+LOS<br>(pptv) | noise<br>(pptv) | random<br>(pptv) | syst<br>(pptv) | total<br>(pptv) |
|------------------|-----------------------|------------------|---------------|-----------------|------------------|----------------|-------------------|-----------------|-----------------|------------------|----------------|-----------------|
| 17               | 336.92                | 0.48             | 2.44          | 0.28            | 9.45             | 3.47           | 19.78             | 3.91            | 21.81           | 24.25            | 20.04          | 31.47           |
| 20               | 302.65                | 0.47             | 3.64          | 0.22            | 1.85             | 3.35           | 20.68             | 3.01            | 10.91           | 12.25            | 20.82          | 24.16           |
| 23               | 204.23                | 0.48             | 3.46          | 0.17            | 4.46             | 2.36           | 18.17             | 3.15            | 18.56           | 19.91            | 18.05          | 26.88           |
| 26               | 129.25                | 0.53             | 2.17          | 0.18            | 6.14             | 1.85           | 12.00             | 2.44            | 23.91           | 25.25            | 11.42          | 27.71           |
| 29               | 80.53                 | 0.50             | 1.54          | 0.27            | 7.99             | 1.21           | 8.63              | 1.34            | 28.72           | 30.26            | 7.30           | 31.13           |
| 32               | 52.31                 | 0.29             | 1.24          | 0.28            | 7.61             | 0.63           | 6.39              | 0.50            | 31.44           | 32.66            | 4.82           | 33.01           |
| 35               | 13.13                 | 0.13             | 0.78          | 0.35            | 5.54             | 0.35           | 3.82              | 0.24            | 32.90           | 33.47            | 2.90           | 33.59           |
| 38               | -4.40                 | 0.15             | 0.42          | 0.48            | 5.09             | 0.43           | 2.10              | 0.20            | 35.52           | 35.92            | 1.62           | 35.95           |
| 41               | -9.55                 | 0.16             | 0.37          | 0.56            | 5.84             | 0.41           | 1.48              | 0.18            | 38.48           | 38.94            | 1.23           | 38.95           |
| 44               | -11.26                | 0.12             | 0.33          | 0.55            | 8.59             | 0.36           | 1.15              | 0.13            | 41.21           | 42.11            | 0.94           | 42.12           |
| 47               | -15.59                | 0.13             | 0.28          | 0.49            | 14.75            | 0.33           | 1.04              | 0.10            | 44.49           | 46.88            | 0.70           | 46.89           |
| 50               | -15.33                | 0.18             | 0.21          | 0.43            | 24.70            | 0.27           | 1.11              | 0.10            | 51.93           | 57.51            | 0.63           | 57.52           |

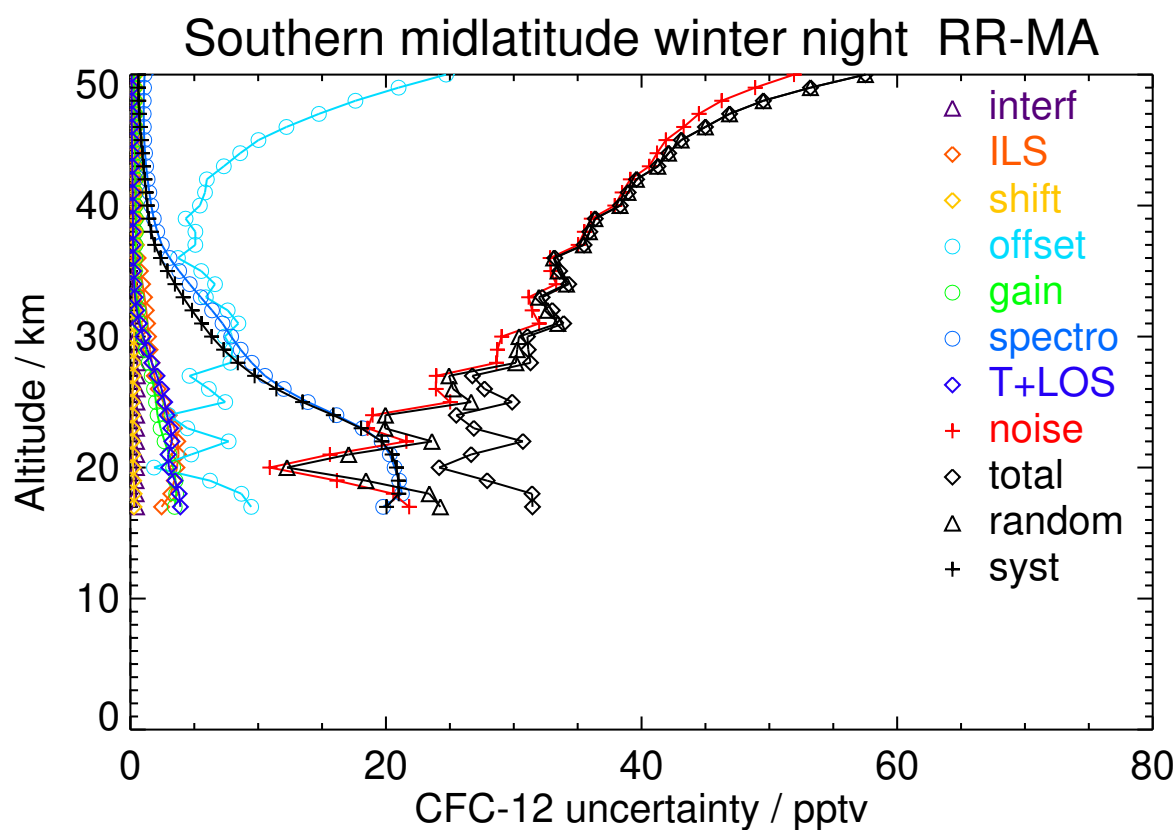

**Figure S88.** V8R\_F-12\_561 Southern midlatitude winter night

**Table S90.** CFC-12 error budget for Southern midlatitude spring day. All uncertainties are  $1\sigma$ .

| altitude<br>(km) | mean target<br>(pptv) | interf<br>(pptv) | ILS<br>(pptv) | shift<br>(pptv) | offset<br>(pptv) | gain<br>(pptv) | spectro<br>(pptv) | T+LOS<br>(pptv) | noise<br>(pptv) | random<br>(pptv) | syst<br>(pptv) | total<br>(pptv) |
|------------------|-----------------------|------------------|---------------|-----------------|------------------|----------------|-------------------|-----------------|-----------------|------------------|----------------|-----------------|
| 20               | 276.97                | 0.59             | 2.66          | 0.13            | 1.97             | 3.34           | 18.65             | 2.86            | 9.30            | 12.11            | 17.83          | 21.56           |
| 23               | 210.85                | 0.61             | 2.18          | 0.13            | 4.71             | 2.39           | 14.67             | 3.20            | 16.15           | 18.01            | 13.96          | 22.79           |
| 26               | 197.12                | 0.67             | 1.82          | 0.16            | 6.32             | 2.38           | 11.68             | 2.11            | 20.82           | 22.32            | 11.19          | 24.97           |
| 29               | 165.87                | 0.67             | 2.19          | 0.40            | 7.59             | 1.94           | 12.73             | 0.91            | 24.93           | 26.45            | 12.32          | 29.18           |
| 32               | 82.18                 | 0.23             | 2.00          | 0.46            | 6.41             | 0.81           | 9.31              | 0.43            | 25.44           | 26.46            | 8.92           | 27.92           |
| 35               | 20.15                 | 0.11             | 0.91          | 0.38            | 5.56             | 0.46           | 4.31              | 0.29            | 28.06           | 28.71            | 3.72           | 28.95           |
| 38               | 0.99                  | 0.14             | 0.29          | 0.45            | 4.96             | 0.50           | 1.82              | 0.26            | 31.29           | 31.71            | 1.51           | 31.74           |
| 41               | 11.21                 | 0.14             | 0.25          | 0.55            | 4.74             | 0.54           | 1.81              | 0.21            | 34.46           | 34.81            | 1.54           | 34.84           |
| 44               | -1.86                 | 0.10             | 0.38          | 0.59            | 5.91             | 0.48           | 1.69              | 0.14            | 37.80           | 38.27            | 1.54           | 38.30           |
| 47               | -17.77                | 0.10             | 0.40          | 0.54            | 10.28            | 0.39           | 1.31              | 0.09            | 41.38           | 42.65            | 1.09           | 42.66           |
| 50               | -20.14                | 0.14             | 0.29          | 0.46            | 18.50            | 0.32           | 1.21              | 0.09            | 47.08           | 50.60            | 0.73           | 50.60           |

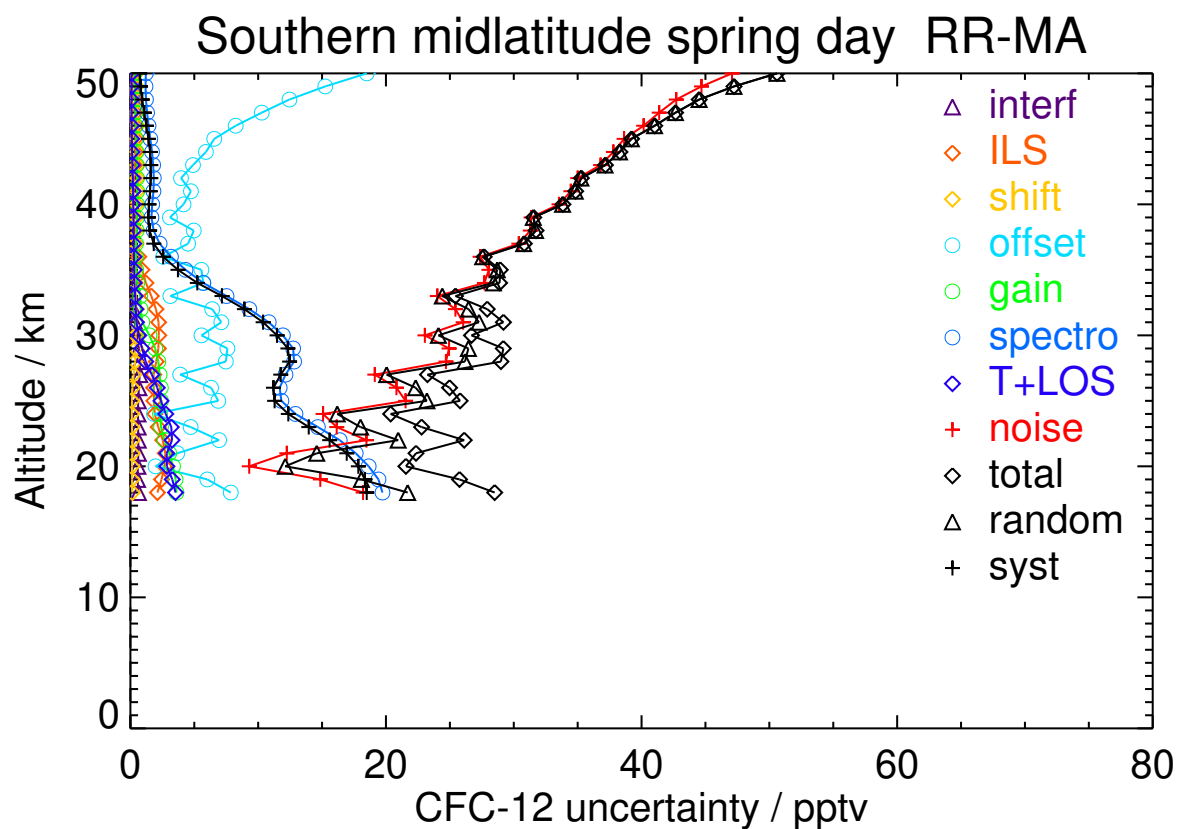

**Figure S89.** V8R\_F-12\_561 Southern midlatitude spring day

**Table S91.** CFC-12 error budget for Southern midlatitude spring night. All uncertainties are  $1\sigma$ .

| altitude<br>(km) | mean target<br>(pptv) | interf<br>(pptv) | ILS<br>(pptv) | shift<br>(pptv) | offset<br>(pptv) | gain<br>(pptv) | spectro<br>(pptv) | T+LOS<br>(pptv) | noise<br>(pptv) | random<br>(pptv) | syst<br>(pptv) | total<br>(pptv) |
|------------------|-----------------------|------------------|---------------|-----------------|------------------|----------------|-------------------|-----------------|-----------------|------------------|----------------|-----------------|
| 17               | 364.38                | 0.92             | 1.16          | 0.11            | 8.20             | 6.21           | 23.23             | 3.70            | 18.02           | 20.95            | 23.39          | 31.40           |
| 20               | 304.50                | 0.63             | 3.01          | 0.22            | 1.53             | 4.20           | 20.99             | 2.80            | 9.15            | 11.01            | 20.98          | 23.70           |
| 23               | 216.68                | 0.61             | 2.23          | 0.11            | 2.87             | 2.91           | 16.17             | 3.04            | 14.71           | 15.90            | 16.01          | 22.57           |
| 26               | 188.36                | 0.65             | 1.52          | 0.16            | 4.38             | 2.01           | 11.81             | 2.17            | 19.53           | 20.55            | 11.37          | 23.49           |
| 29               | 161.78                | 0.65             | 2.29          | 0.38            | 6.55             | 1.77           | 11.96             | 0.96            | 23.53           | 24.85            | 11.49          | 27.38           |
| 32               | 98.30                 | 0.37             | 2.07          | 0.44            | 6.76             | 1.10           | 9.68              | 0.41            | 26.54           | 27.61            | 9.35           | 29.15           |
| 35               | 26.19                 | 0.11             | 1.14          | 0.43            | 4.26             | 0.58           | 5.43              | 0.30            | 26.98           | 27.45            | 4.89           | 27.88           |
| 38               | 0.29                  | 0.13             | 0.27          | 0.49            | 4.25             | 0.57           | 2.27              | 0.26            | 30.76           | 31.08            | 1.96           | 31.14           |
| 41               | -8.18                 | 0.14             | 0.21          | 0.56            | 4.31             | 0.54           | 1.80              | 0.22            | 33.97           | 34.26            | 1.63           | 34.30           |
| 44               | -17.78                | 0.11             | 0.33          | 0.59            | 5.66             | 0.46           | 1.40              | 0.14            | 37.47           | 37.90            | 1.29           | 37.93           |
| 47               | -11.05                | 0.10             | 0.35          | 0.55            | 9.98             | 0.38           | 0.98              | 0.09            | 41.11           | 42.31            | 0.85           | 42.32           |
| 50               | -7.28                 | 0.13             | 0.28          | 0.49            | 18.24            | 0.30           | 0.94              | 0.09            | 46.96           | 50.39            | 0.63           | 50.39           |

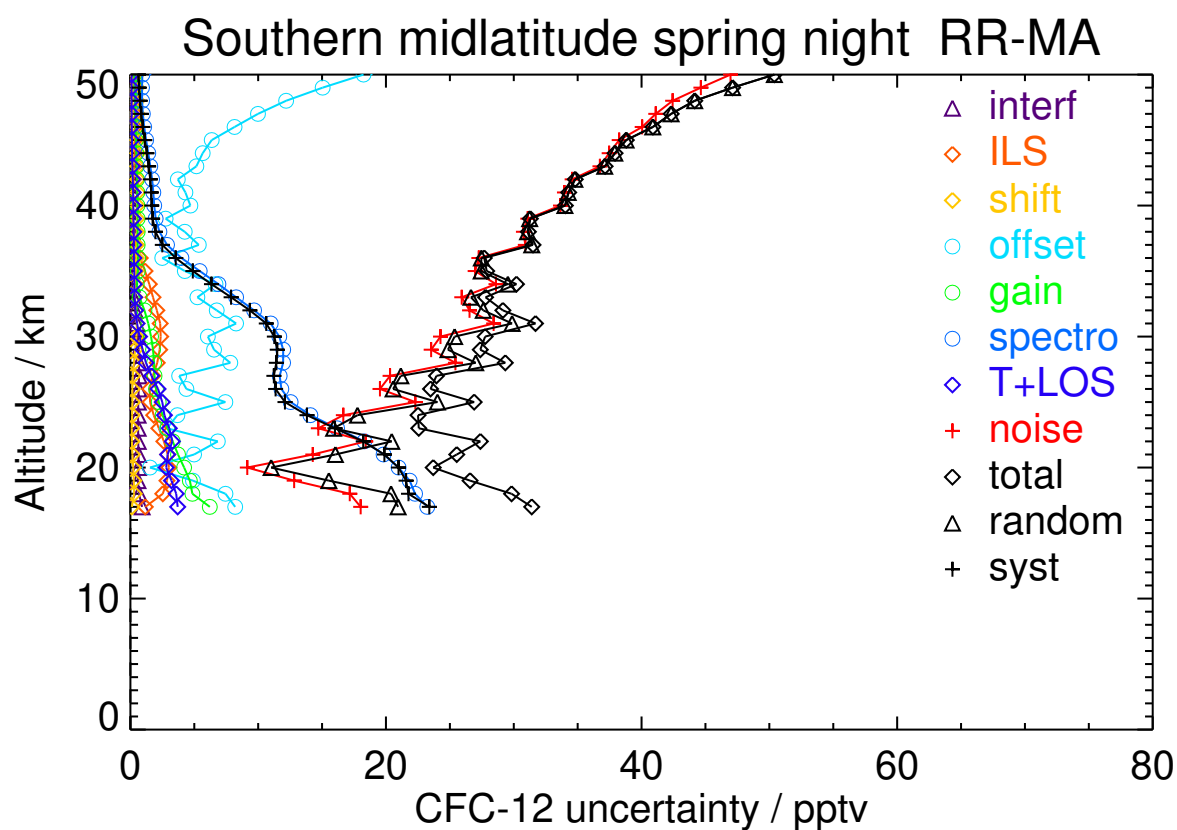

**Figure S90.** V8R\_F-12\_561 Southern midlatitude spring night

**Table S92.** CFC-12 error budget for Southern midlatitude summer day. All uncertainties are  $1\sigma$ .

| altitude<br>(km) | mean target<br>(pptv) | interf<br>(pptv) | ILS<br>(pptv) | shift<br>(pptv) | offset<br>(pptv) | gain<br>(pptv) | spectro<br>(pptv) | T+LOS<br>(pptv) | noise<br>(pptv) | random<br>(pptv) | syst<br>(pptv) | total<br>(pptv) |
|------------------|-----------------------|------------------|---------------|-----------------|------------------|----------------|-------------------|-----------------|-----------------|------------------|----------------|-----------------|
| 17               | 435.96                | 0.86             | 2.63          | 0.23            | 7.70             | 5.39           | 26.04             | 4.23            | 16.71           | 19.79            | 26.06          | 32.73           |
| 20               | 349.68                | 0.63             | 3.73          | 0.14            | 4.14             | 4.64           | 24.36             | 2.85            | 11.93           | 13.51            | 24.79          | 28.23           |
| 23               | 235.03                | 0.58             | 2.51          | 0.13            | 2.92             | 2.87           | 18.82             | 2.59            | 14.15           | 15.00            | 18.96          | 24.17           |
| 26               | 153.75                | 0.84             | 3.01          | 0.33            | 4.39             | 1.91           | 13.18             | 1.96            | 16.92           | 17.83            | 13.36          | 22.28           |
| 29               | 76.44                 | 0.57             | 2.15          | 0.32            | 5.00             | 0.76           | 7.65              | 1.05            | 19.82           | 20.67            | 7.47           | 21.98           |
| 32               | 32.97                 | 0.14             | 1.09          | 0.39            | 2.50             | 0.81           | 3.75              | 0.53            | 20.30           | 20.56            | 3.47           | 20.85           |
| 35               | 16.26                 | 0.15             | 0.51          | 0.35            | 2.64             | 0.50           | 2.52              | 0.31            | 23.73           | 23.95            | 1.87           | 24.02           |
| 38               | -2.28                 | 0.14             | 0.12          | 0.47            | 2.84             | 0.60           | 2.07              | 0.26            | 26.96           | 27.14            | 1.89           | 27.20           |
| 41               | -12.97                | 0.15             | 0.19          | 0.54            | 3.20             | 0.60           | 1.97              | 0.22            | 30.36           | 30.55            | 1.78           | 30.60           |
| 44               | -5.36                 | 0.13             | 0.35          | 0.57            | 4.26             | 0.56           | 1.45              | 0.14            | 34.02           | 34.30            | 1.44           | 34.33           |
| 47               | -6.96                 | 0.11             | 0.38          | 0.55            | 7.29             | 0.50           | 1.14              | 0.12            | 37.73           | 38.44            | 1.08           | 38.45           |
| 50               | -16.79                | 0.13             | 0.34          | 0.48            | 14.07            | 0.47           | 1.24              | 0.13            | 42.40           | 44.69            | 0.90           | 44.70           |

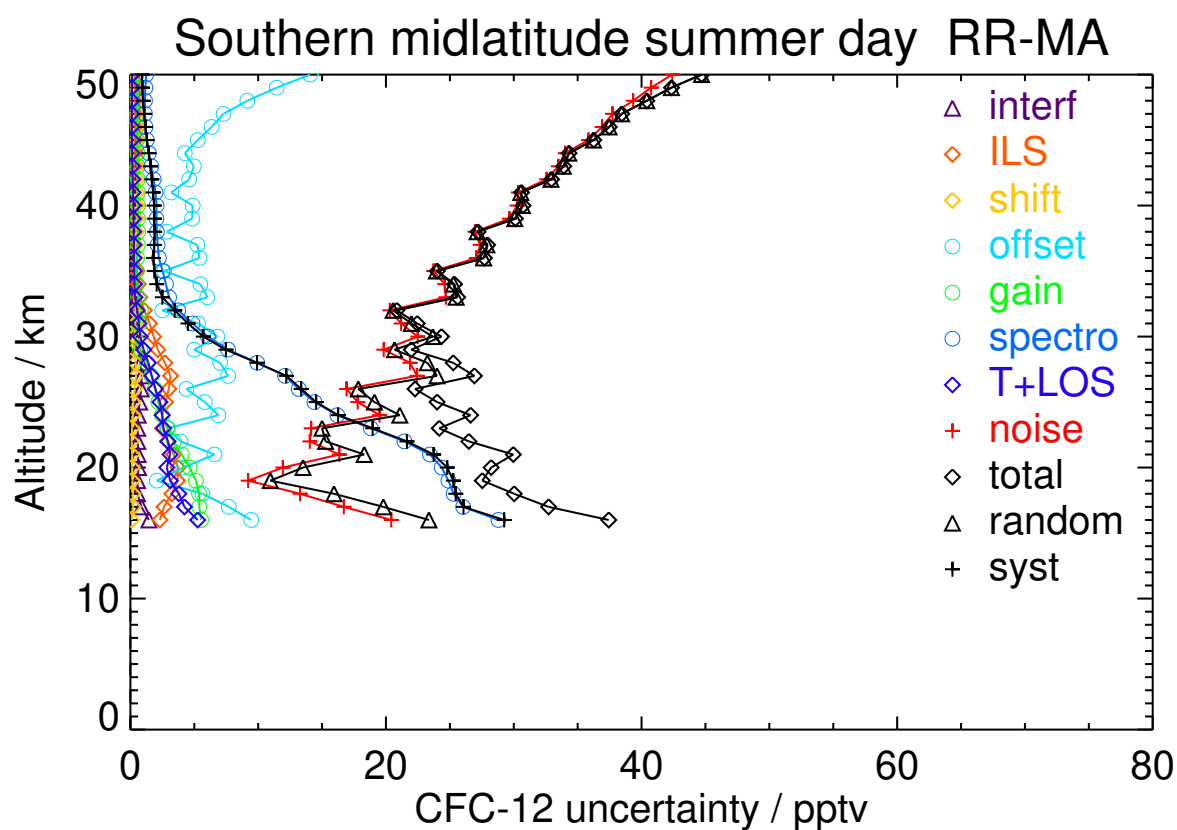

**Figure S91.** V8R\_F-12\_561 Southern midlatitude summer day

**Table S93.** CFC-12 error budget for Southern midlatitude summer night. All uncertainties are  $1\sigma$ .

| altitude<br>(km) | mean target<br>(pptv) | interf<br>(pptv) | ILS<br>(pptv) | shift<br>(pptv) | offset<br>(pptv) | gain<br>(pptv) | spectro<br>(pptv) | T+LOS<br>(pptv) | noise<br>(pptv) | random<br>(pptv) | syst<br>(pptv) | total<br>(pptv) |
|------------------|-----------------------|------------------|---------------|-----------------|------------------|----------------|-------------------|-----------------|-----------------|------------------|----------------|-----------------|
| 17               | 427.85                | 1.10             | 2.92          | 0.13            | 8.38             | 5.51           | 27.82             | 4.45            | 18.15           | 21.27            | 27.95          | 35.12           |
| 20               | 350.71                | 0.66             | 3.49          | 0.11            | 3.02             | 4.71           | 25.57             | 2.88            | 10.58           | 12.19            | 25.88          | 28.60           |
| 23               | 231.81                | 0.61             | 2.93          | 0.12            | 2.23             | 3.03           | 19.89             | 2.70            | 13.73           | 14.60            | 20.04          | 24.79           |
| 26               | 146.48                | 0.83             | 3.09          | 0.30            | 4.44             | 1.85           | 12.76             | 2.01            | 16.84           | 17.77            | 12.97          | 22.00           |
| 29               | 78.11                 | 0.65             | 2.08          | 0.35            | 5.46             | 0.83           | 7.31              | 1.09            | 20.46           | 21.33            | 7.31           | 22.55           |
| 32               | 34.65                 | 0.15             | 1.23          | 0.41            | 2.72             | 0.81           | 4.12              | 0.55            | 20.33           | 20.62            | 3.90           | 20.98           |
| 35               | 10.85                 | 0.15             | 0.49          | 0.36            | 3.07             | 0.50           | 2.30              | 0.32            | 23.72           | 23.98            | 1.76           | 24.05           |
| 38               | -2.56                 | 0.15             | 0.12          | 0.46            | 3.38             | 0.62           | 1.84              | 0.28            | 26.89           | 27.14            | 1.56           | 27.18           |
| 41               | -6.18                 | 0.16             | 0.14          | 0.53            | 3.59             | 0.67           | 1.90              | 0.23            | 29.90           | 30.13            | 1.84           | 30.18           |
| 44               | -11.34                | 0.14             | 0.32          | 0.59            | 4.32             | 0.60           | 1.54              | 0.14            | 33.13           | 33.42            | 1.53           | 33.46           |
| 47               | -9.79                 | 0.12             | 0.34          | 0.56            | 6.66             | 0.50           | 1.16              | 0.12            | 36.81           | 37.42            | 1.07           | 37.44           |
| 50               | -4.26                 | 0.14             | 0.33          | 0.50            | 12.63            | 0.49           | 1.20              | 0.14            | 41.38           | 43.27            | 0.95           | 43.28           |

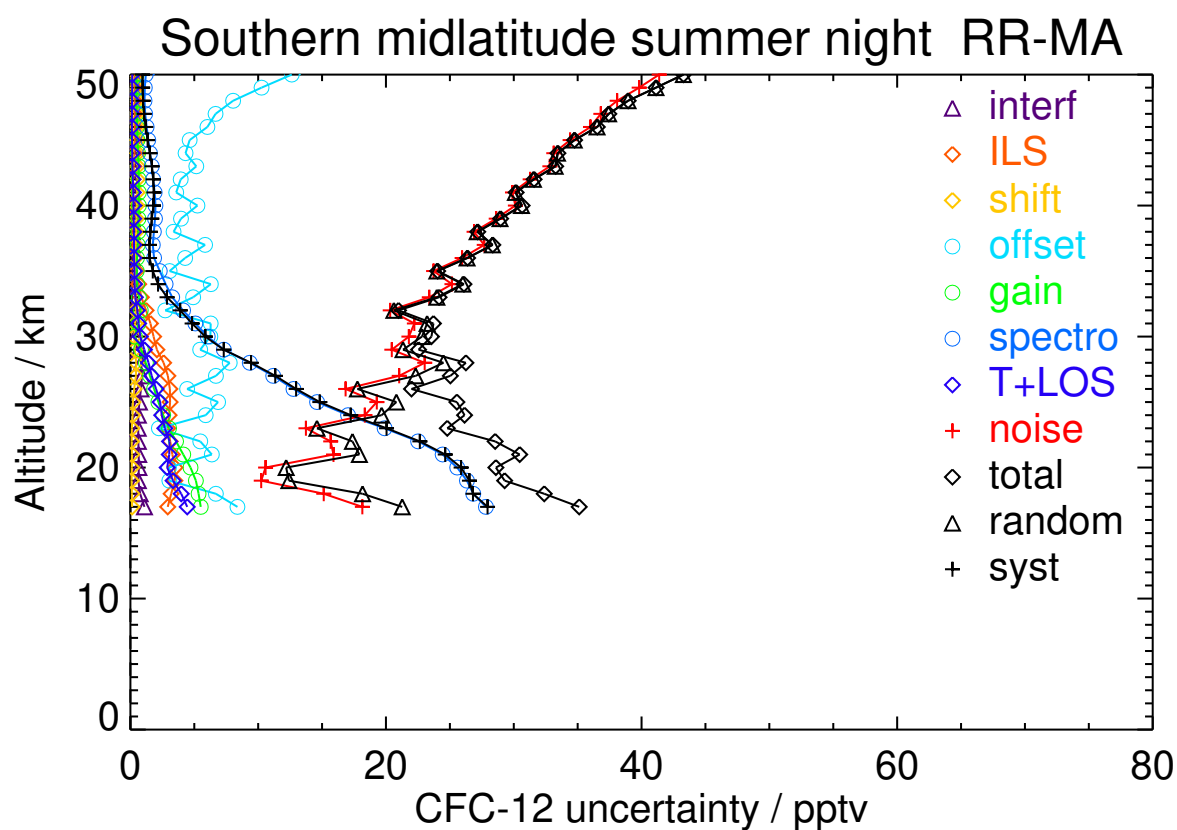

**Figure S92.** V8R\_F-12\_561 Southern midlatitude summer night

**Table S94.** CFC-12 error budget for Southern midlatitude autumn day. All uncertainties are  $1\sigma$ .

| altitude<br>(km) | mean target<br>(pptv) | interf<br>(pptv) | ILS<br>(pptv) | shift<br>(pptv) | offset<br>(pptv) | gain<br>(pptv) | spectro<br>(pptv) | T+LOS<br>(pptv) | noise<br>(pptv) | random<br>(pptv) | syst<br>(pptv) | total<br>(pptv) |
|------------------|-----------------------|------------------|---------------|-----------------|------------------|----------------|-------------------|-----------------|-----------------|------------------|----------------|-----------------|
| 20               | 365.04                | 0.51             | 3.93          | 0.20            | 1.88             | 4.63           | 25.41             | 3.23            | 9.89            | 11.27            | 25.84          | 28.19           |
| 23               | 229.12                | 0.54             | 3.60          | 0.09            | 4.64             | 3.19           | 20.93             | 3.07            | 16.64           | 18.18            | 20.95          | 27.74           |
| 26               | 149.47                | 0.62             | 2.64          | 0.21            | 6.43             | 2.16           | 13.29             | 2.03            | 20.70           | 22.13            | 13.13          | 25.74           |
| 29               | 77.45                 | 0.59             | 1.97          | 0.36            | 7.49             | 1.17           | 8.65              | 1.25            | 25.41           | 26.75            | 8.25           | 28.00           |
| 32               | 32.17                 | 0.17             | 1.15          | 0.35            | 5.71             | 0.47           | 4.69              | 0.65            | 25.39           | 26.20            | 3.82           | 26.48           |
| 35               | 9.83                  | 0.10             | 0.52          | 0.37            | 5.31             | 0.40           | 2.45              | 0.30            | 28.70           | 29.25            | 1.64           | 29.30           |
| 38               | 3.16                  | 0.12             | 0.29          | 0.43            | 4.67             | 0.46           | 2.00              | 0.24            | 31.92           | 32.30            | 1.46           | 32.33           |
| 41               | -4.81                 | 0.13             | 0.32          | 0.55            | 4.87             | 0.46           | 1.80              | 0.20            | 35.49           | 35.84            | 1.53           | 35.88           |
| 44               | -6.09                 | 0.09             | 0.42          | 0.60            | 7.22             | 0.42           | 1.70              | 0.13            | 38.93           | 39.61            | 1.37           | 39.64           |
| 47               | -7.89                 | 0.09             | 0.41          | 0.56            | 13.40            | 0.37           | 1.59              | 0.08            | 43.09           | 45.15            | 1.05           | 45.16           |
| 50               | -16.04                | 0.14             | 0.31          | 0.49            | 23.75            | 0.31           | 1.78              | 0.07            | 51.55           | 56.78            | 0.94           | 56.79           |

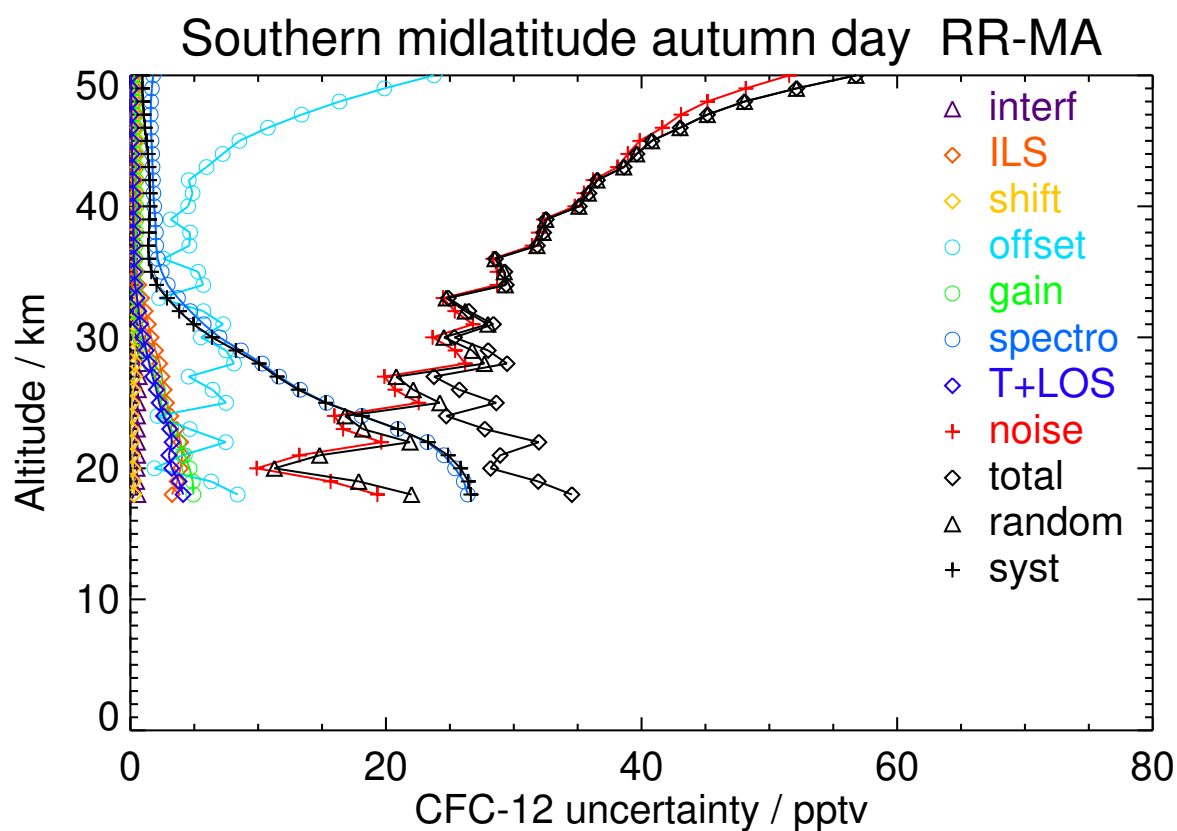

**Figure S93.** V8R\_F-12\_561 Southern midlatitude autumn day

**Table S95.** CFC-12 error budget for Southern midlatitude autumn night. All uncertainties are  $1\sigma$ .

| altitude<br>(km) | mean target<br>(pptv) | interf<br>(pptv) | ILS<br>(pptv) | shift<br>(pptv) | offset<br>(pptv) | gain<br>(pptv) | spectro<br>(pptv) | T+LOS<br>(pptv) | noise<br>(pptv) | random<br>(pptv) | syst<br>(pptv) | total<br>(pptv) |
|------------------|-----------------------|------------------|---------------|-----------------|------------------|----------------|-------------------|-----------------|-----------------|------------------|----------------|-----------------|
| 20               | 363.62                | 0.53             | 4.19          | 0.17            | 1.73             | 5.02           | 26.07             | 3.23            | 9.91            | 11.57            | 26.47          | 28.89           |
| 23               | 228.64                | 0.54             | 3.15          | 0.10            | 4.41             | 3.13           | 20.82             | 3.04            | 16.53           | 17.88            | 20.87          | 27.49           |
| 26               | 147.26                | 0.62             | 2.48          | 0.18            | 6.23             | 1.65           | 13.11             | 2.00            | 20.75           | 22.03            | 12.99          | 25.58           |
| 29               | 68.09                 | 0.58             | 1.94          | 0.35            | 7.21             | 1.05           | 8.38              | 1.22            | 25.26           | 26.47            | 8.14           | 27.70           |
| 32               | 18.44                 | 0.16             | 0.96          | 0.34            | 5.32             | 0.44           | 3.73              | 0.65            | 25.32           | 26.01            | 2.95           | 26.17           |
| 35               | 3.21                  | 0.10             | 0.38          | 0.36            | 4.93             | 0.36           | 1.81              | 0.30            | 28.71           | 29.18            | 1.01           | 29.19           |
| 38               | 3.72                  | 0.12             | 0.27          | 0.44            | 4.58             | 0.47           | 1.87              | 0.24            | 31.98           | 32.35            | 1.21           | 32.37           |
| 41               | 4.74                  | 0.13             | 0.32          | 0.55            | 4.72             | 0.51           | 1.96              | 0.20            | 35.27           | 35.61            | 1.63           | 35.65           |
| 44               | -3.88                 | 0.09             | 0.45          | 0.59            | 7.16             | 0.45           | 1.98              | 0.13            | 38.76           | 39.44            | 1.57           | 39.48           |
| 47               | -7.88                 | 0.10             | 0.45          | 0.56            | 13.33            | 0.36           | 1.63              | 0.08            | 43.16           | 45.20            | 1.13           | 45.21           |
| 50               | -17.54                | 0.15             | 0.34          | 0.51            | 23.58            | 0.26           | 1.43              | 0.07            | 51.65           | 56.79            | 0.84           | 56.80           |

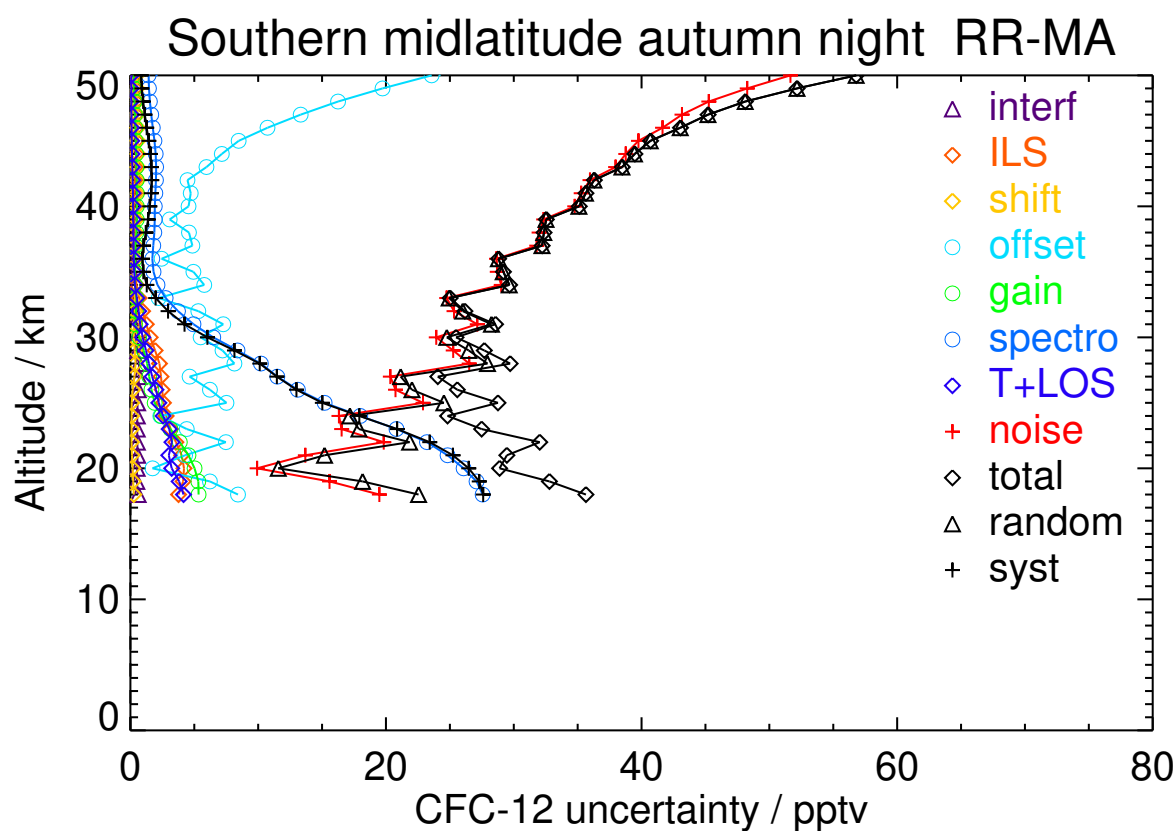

**Figure S94.** V8R\_F-12\_561 Southern midlatitude autumn night

**Table S96.** CFC-12 error budget for Southern polar winter day. All uncertainties are  $1\sigma$ .

| altitude<br>(km) | mean target<br>(pptv) | interf<br>(pptv) | ILS<br>(pptv) | shift<br>(pptv) | offset<br>(pptv) | gain<br>(pptv) | spectro<br>(pptv) | T+LOS<br>(pptv) | noise<br>(pptv) | random<br>(pptv) | syst<br>(pptv) | total<br>(pptv) |
|------------------|-----------------------|------------------|---------------|-----------------|------------------|----------------|-------------------|-----------------|-----------------|------------------|----------------|-----------------|
| 17               | 187.37                | 0.54             | 5.08          | 0.40            | 11.09            | 1.87           | 14.84             | 4.46            | 26.78           | 29.60            | 15.29          | 33.31           |
| 20               | 116.48                | 0.44             | 4.18          | 0.31            | 2.67             | 1.17           | 11.98             | 3.61            | 15.52           | 16.81            | 11.88          | 20.59           |
| 23               | 36.35                 | 0.49             | 2.89          | 0.23            | 6.14             | 0.50           | 8.04              | 2.76            | 25.25           | 26.52            | 7.28           | 27.50           |
| 26               | 12.40                 | 0.62             | 1.03          | 0.23            | 7.96             | 0.20           | 3.15              | 1.42            | 28.87           | 30.12            | 1.86           | 30.17           |
| 29               | 12.40                 | 0.56             | 0.59          | 0.25            | 8.92             | 0.18           | 1.89              | 0.43            | 31.76           | 33.03            | 1.25           | 33.05           |
| 32               | -9.07                 | 0.22             | 0.60          | 0.23            | 6.39             | 0.23           | 1.90              | 0.12            | 31.95           | 32.63            | 1.12           | 32.65           |
| 35               | -9.79                 | 0.12             | 0.35          | 0.42            | 5.09             | 0.36           | 1.43              | 0.09            | 33.07           | 33.48            | 0.97           | 33.49           |
| 38               | -9.39                 | 0.10             | 0.31          | 0.52            | 5.01             | 0.43           | 1.37              | 0.09            | 35.11           | 35.48            | 1.06           | 35.50           |
| 41               | -7.31                 | 0.09             | 0.32          | 0.57            | 5.75             | 0.41           | 1.15              | 0.09            | 37.27           | 37.72            | 0.88           | 37.73           |
| 44               | -2.92                 | 0.10             | 0.23          | 0.49            | 8.42             | 0.33           | 1.03              | 0.10            | 40.19           | 41.07            | 0.71           | 41.08           |
| 47               | 2.01                  | 0.14             | 0.19          | 0.40            | 14.40            | 0.33           | 1.41              | 0.12            | 43.90           | 46.22            | 0.95           | 46.23           |
| 50               | 11.35                 | 0.19             | 0.23          | 0.34            | 24.44            | 0.38           | 2.02              | 0.14            | 51.84           | 57.33            | 1.33           | 57.35           |

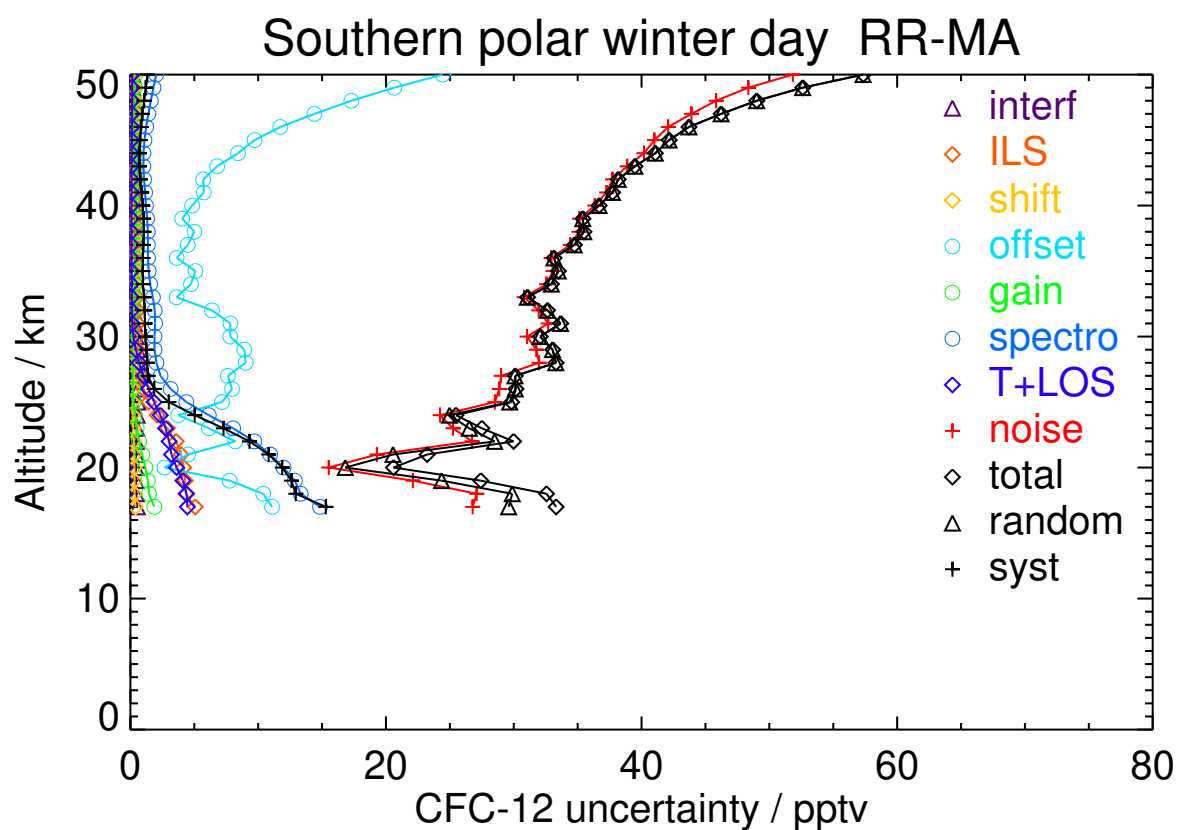

**Figure S95.** V8R\_F-12\_561 Southern polar winter day

**Table S97.** CFC-12 error budget for Southern polar winter night. All uncertainties are  $1\sigma$ .

| altitude<br>(km) | mean target<br>(pptv) | interf<br>(pptv) | ILS<br>(pptv) | shift<br>(pptv) | offset<br>(pptv) | gain<br>(pptv) | spectro<br>(pptv) | T+LOS<br>(pptv) | noise<br>(pptv) | random<br>(pptv) | syst<br>(pptv) | total<br>(pptv) |
|------------------|-----------------------|------------------|---------------|-----------------|------------------|----------------|-------------------|-----------------|-----------------|------------------|----------------|-----------------|
| 20               | 161.52                | 0.40             | 5.39          | 0.44            | 5.01             | 1.92           | 14.00             | 3.70            | 18.07           | 19.84            | 14.16          | 24.38           |
| 23               | 55.35                 | 0.48             | 3.95          | 0.42            | 7.49             | 0.64           | 10.17             | 2.72            | 26.39           | 27.97            | 9.87           | 29.66           |
| 26               | 5.12                  | 0.60             | 1.26          | 0.23            | 8.02             | 0.23           | 3.55              | 1.36            | 28.87           | 30.12            | 2.74           | 30.24           |
| 29               | -5.36                 | 0.59             | 0.79          | 0.30            | 9.22             | 0.15           | 1.50              | 0.41            | 32.26           | 33.60            | 0.66           | 33.61           |
| 32               | -0.59                 | 0.23             | 0.45          | 0.23            | 7.16             | 0.25           | 1.25              | 0.13            | 32.35           | 33.15            | 0.70           | 33.16           |
| 35               | -3.69                 | 0.12             | 0.38          | 0.43            | 5.24             | 0.38           | 1.44              | 0.09            | 33.03           | 33.47            | 0.98           | 33.49           |
| 38               | -8.83                 | 0.10             | 0.31          | 0.55            | 5.03             | 0.48           | 1.32              | 0.08            | 35.09           | 35.46            | 1.16           | 35.48           |
| 41               | -6.88                 | 0.09             | 0.33          | 0.56            | 5.73             | 0.44           | 1.33              | 0.09            | 37.31           | 37.76            | 1.01           | 37.78           |
| 44               | 0.01                  | 0.10             | 0.29          | 0.48            | 8.17             | 0.38           | 1.28              | 0.10            | 40.07           | 40.91            | 0.87           | 40.92           |
| 47               | 0.95                  | 0.14             | 0.24          | 0.42            | 13.68            | 0.35           | 1.33              | 0.12            | 43.62           | 45.73            | 0.86           | 45.74           |
| 50               | -0.04                 | 0.19             | 0.18          | 0.39            | 23.32            | 0.36           | 1.49              | 0.13            | 50.80           | 55.91            | 0.94           | 55.92           |

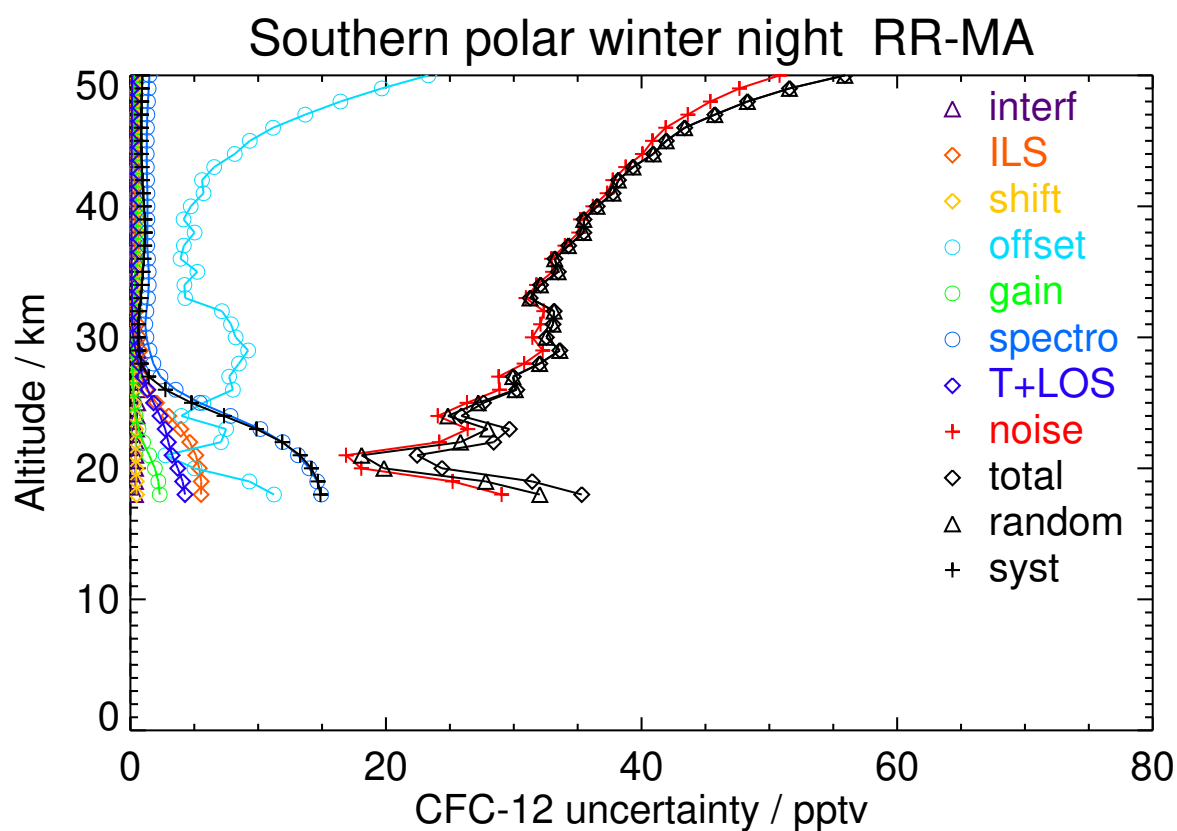

**Figure S96.** V8R\_F-12\_561 Southern polar winter night

**Table S98.** CFC-12 error budget for Southern polar spring day. All uncertainties are  $1\sigma$ .

| altitude<br>(km) | mean target<br>(pptv) | interf<br>(pptv) | ILS<br>(pptv) | shift<br>(pptv) | offset<br>(pptv) | gain<br>(pptv) | spectro<br>(pptv) | T+LOS<br>(pptv) | noise<br>(pptv) | random<br>(pptv) | syst<br>(pptv) | total<br>(pptv) |
|------------------|-----------------------|------------------|---------------|-----------------|------------------|----------------|-------------------|-----------------|-----------------|------------------|----------------|-----------------|
| 20               | 63.64                 | 0.58             | 2.44          | 0.09            | 2.77             | 1.01           | 7.04              | 2.95            | 12.45           | 14.39            | 4.58           | 15.11           |
| 23               | 55.94                 | 0.75             | 1.19          | 0.09            | 5.29             | 0.64           | 5.92              | 1.09            | 18.33           | 19.89            | 2.63           | 20.07           |
| 26               | 88.54                 | 0.97             | 1.24          | 0.25            | 6.80             | 1.39           | 7.55              | 0.27            | 21.00           | 22.94            | 4.72           | 23.42           |
| 29               | 61.68                 | 1.03             | 1.73          | 0.53            | 7.64             | 1.18           | 7.69              | 0.22            | 24.55           | 26.38            | 5.46           | 26.94           |
| 32               | 19.05                 | 0.19             | 1.01          | 0.48            | 5.69             | 0.77           | 3.73              | 0.27            | 22.00           | 22.88            | 2.91           | 23.07           |
| 35               | 2.32                  | 0.18             | 0.37          | 0.42            | 6.02             | 0.71           | 1.97              | 0.21            | 25.48           | 26.23            | 1.53           | 26.27           |
| 38               | -7.80                 | 0.20             | 0.16          | 0.45            | 5.66             | 0.64           | 1.56              | 0.18            | 28.80           | 29.37            | 1.38           | 29.40           |
| 41               | -0.84                 | 0.17             | 0.16          | 0.51            | 5.04             | 0.55           | 1.60              | 0.15            | 32.20           | 32.61            | 1.37           | 32.64           |
| 44               | -0.84                 | 0.11             | 0.34          | 0.56            | 5.40             | 0.49           | 1.51              | 0.11            | 35.81           | 36.24            | 1.23           | 36.26           |
| 47               | -8.18                 | 0.11             | 0.39          | 0.58            | 8.29             | 0.48           | 1.29              | 0.11            | 39.53           | 40.41            | 1.08           | 40.42           |
| 50               | -13.93                | 0.14             | 0.34          | 0.55            | 15.43            | 0.45           | 1.23              | 0.13            | 44.65           | 47.25            | 0.90           | 47.26           |

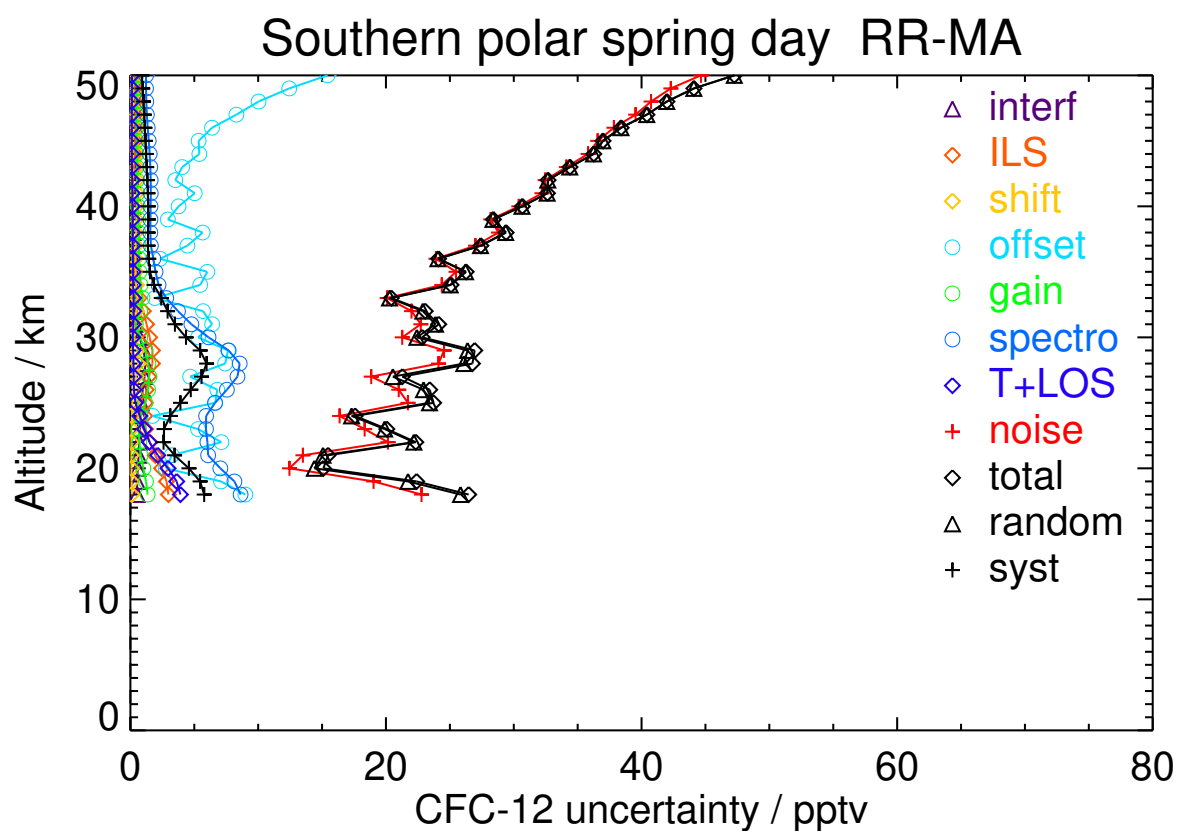

**Figure S97.** V8R\_F-12\_561 Southern polar spring day

**Table S99.** CFC-12 error budget for Southern polar spring night. All uncertainties are  $1\sigma$ .

| altitude<br>(km) | mean target<br>(pptv) | interf<br>(pptv) | ILS<br>(pptv) | shift<br>(pptv) | offset<br>(pptv) | gain<br>(pptv) | spectro<br>(pptv) | T+LOS<br>(pptv) | noise<br>(pptv) | random<br>(pptv) | syst<br>(pptv) | total<br>(pptv) |
|------------------|-----------------------|------------------|---------------|-----------------|------------------|----------------|-------------------|-----------------|-----------------|------------------|----------------|-----------------|
| 20               | 108.66                | 0.57             | 2.72          | 0.12            | 2.33             | 1.63           | 9.35              | 2.79            | 11.26           | 13.31            | 7.79           | 15.43           |
| 23               | 71.85                 | 0.70             | 1.20          | 0.09            | 4.80             | 1.12           | 7.06              | 1.12            | 17.45           | 19.04            | 4.39           | 19.54           |
| 26               | 87.13                 | 0.90             | 0.99          | 0.24            | 6.15             | 1.08           | 6.81              | 0.28            | 20.63           | 22.17            | 4.64           | 22.65           |
| 29               | 64.98                 | 0.91             | 1.78          | 0.46            | 7.31             | 1.14           | 7.38              | 0.19            | 23.97           | 25.64            | 5.52           | 26.23           |
| 32               | 31.95                 | 0.30             | 1.26          | 0.46            | 5.90             | 0.76           | 4.70              | 0.24            | 23.33           | 24.28            | 3.77           | 24.57           |
| 35               | 7.86                  | 0.15             | 0.46          | 0.47            | 5.45             | 0.75           | 2.47              | 0.19            | 25.65           | 26.27            | 2.13           | 26.36           |
| 38               | -0.25                 | 0.17             | 0.16          | 0.51            | 5.18             | 0.70           | 1.95              | 0.16            | 28.83           | 29.31            | 1.81           | 29.37           |
| 41               | -16.86                | 0.16             | 0.16          | 0.55            | 4.79             | 0.57           | 1.69              | 0.14            | 32.19           | 32.56            | 1.61           | 32.60           |
| 44               | -29.06                | 0.11             | 0.28          | 0.55            | 5.44             | 0.46           | 1.18              | 0.11            | 35.95           | 36.37            | 1.07           | 36.39           |
| 47               | -10.41                | 0.10             | 0.31          | 0.54            | 8.77             | 0.39           | 0.90              | 0.11            | 39.70           | 40.67            | 0.70           | 40.67           |
| 50               | 3.97                  | 0.14             | 0.26          | 0.52            | 16.34            | 0.35           | 1.11              | 0.12            | 45.23           | 48.11            | 0.76           | 48.11           |

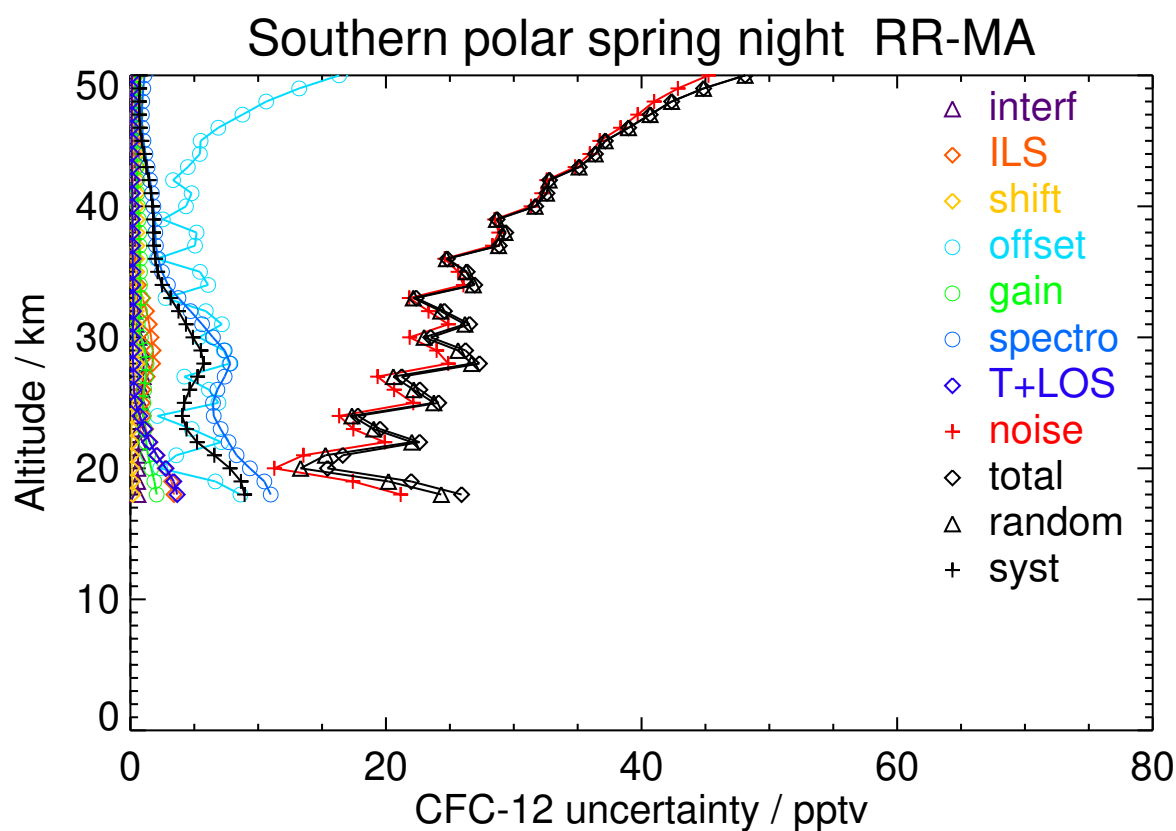

**Figure S98.** V8R\_F-12\_561 Southern polar spring night

**Table S100.** CFC-12 error budget for Southern polar summer day. All uncertainties are  $1\sigma$ .

| altitude<br>(km) | mean target<br>(pptv) | interf<br>(pptv) | ILS<br>(pptv) | shift<br>(pptv) | offset<br>(pptv) | gain<br>(pptv) | spectro<br>(pptv) | T+LOS<br>(pptv) | noise<br>(pptv) | random<br>(pptv) | syst<br>(pptv) | total<br>(pptv) |
|------------------|-----------------------|------------------|---------------|-----------------|------------------|----------------|-------------------|-----------------|-----------------|------------------|----------------|-----------------|
| 17               | 365.71                | 0.91             | 1.37          | 0.23            | 7.48             | 4.75           | 22.68             | 3.48            | 15.67           | 18.55            | 22.57          | 29.21           |
| 20               | 276.87                | 0.73             | 2.23          | 0.17            | 2.35             | 3.71           | 18.88             | 2.39            | 8.36            | 10.93            | 18.38          | 21.38           |
| 23               | 186.44                | 0.73             | 1.58          | 0.08            | 4.00             | 2.30           | 14.95             | 2.07            | 13.57           | 14.78            | 14.75          | 20.89           |
| 26               | 120.61                | 0.80             | 1.78          | 0.22            | 6.08             | 1.35           | 9.29              | 1.75            | 18.14           | 19.42            | 9.16           | 21.47           |
| 29               | 75.28                 | 0.88             | 1.63          | 0.42            | 7.38             | 0.84           | 6.55              | 0.92            | 22.34           | 23.67            | 6.41           | 24.53           |
| 32               | 37.04                 | 0.16             | 1.07          | 0.35            | 5.60             | 0.62           | 3.87              | 0.39            | 21.13           | 21.93            | 3.71           | 22.24           |
| 35               | 4.50                  | 0.16             | 0.46          | 0.32            | 5.95             | 0.47           | 1.84              | 0.24            | 24.67           | 25.42            | 1.36           | 25.45           |
| 38               | 2.56                  | 0.18             | 0.15          | 0.40            | 5.79             | 0.60           | 1.56              | 0.23            | 27.40           | 28.03            | 1.31           | 28.06           |
| 41               | -3.26                 | 0.21             | 0.21          | 0.61            | 5.33             | 0.70           | 1.71              | 0.20            | 29.82           | 30.31            | 1.67           | 30.36           |
| 44               | -6.42                 | 0.18             | 0.31          | 0.53            | 5.20             | 0.58           | 1.51              | 0.15            | 32.46           | 32.89            | 1.42           | 32.92           |
| 47               | -13.11                | 0.16             | 0.28          | 0.42            | 5.87             | 0.47           | 1.07              | 0.15            | 35.53           | 36.03            | 0.91           | 36.04           |
| 50               | -10.84                | 0.19             | 0.25          | 0.32            | 8.99             | 0.47           | 1.10              | 0.19            | 38.82           | 39.86            | 0.76           | 39.87           |

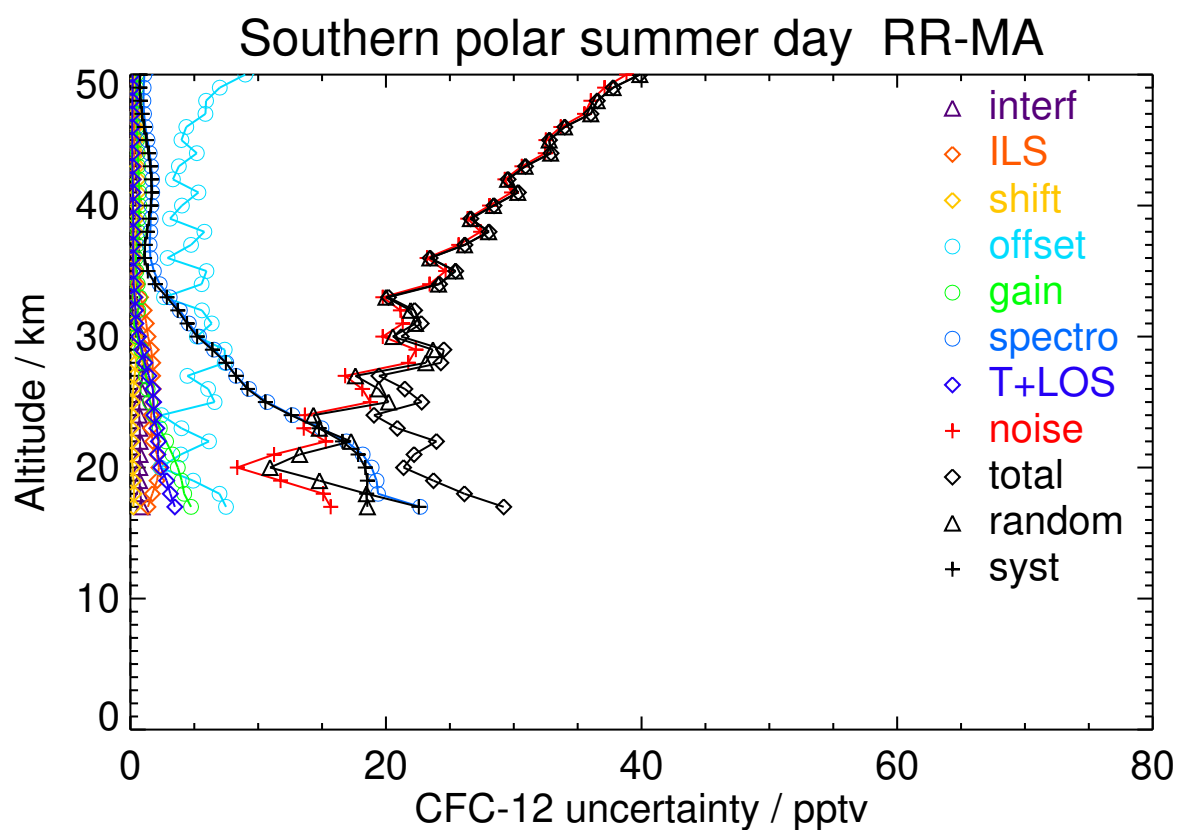

**Figure S99.** V8R\_F-12\_561 Southern polar summer day

**Table S101.** CFC-12 error budget for Southern polar summer night. All uncertainties are  $1\sigma$ .

| altitude<br>(km) | mean target<br>(pptv) | interf<br>(pptv) | ILS<br>(pptv) | shift<br>(pptv) | offset<br>(pptv) | gain<br>(pptv) | spectro<br>(pptv) | T+LOS<br>(pptv) | noise<br>(pptv) | random<br>(pptv) | syst<br>(pptv) | total<br>(pptv) |
|------------------|-----------------------|------------------|---------------|-----------------|------------------|----------------|-------------------|-----------------|-----------------|------------------|----------------|-----------------|
| 17               | 366.88                | 0.93             | 1.23          | 0.19            | 7.84             | 4.24           | 23.23             | 3.66            | 16.59           | 19.71            | 22.84          | 30.17           |
| 20               | 301.76                | 0.67             | 2.52          | 0.04            | 2.64             | 3.81           | 20.10             | 2.55            | 9.29            | 10.51            | 20.36          | 22.92           |
| 23               | 195.35                | 0.66             | 2.33          | 0.08            | 4.48             | 3.05           | 17.56             | 2.25            | 15.23           | 16.30            | 17.74          | 24.09           |
| 26               | 105.97                | 0.74             | 2.29          | 0.17            | 6.40             | 1.70           | 10.33             | 1.82            | 19.53           | 20.84            | 10.33          | 23.26           |
| 29               | 53.88                 | 0.72             | 1.38          | 0.36            | 7.51             | 0.65           | 5.77              | 0.94            | 23.69           | 24.97            | 5.61           | 25.59           |
| 32               | 16.66                 | 0.15             | 0.71          | 0.32            | 5.52             | 0.52           | 2.65              | 0.42            | 22.73           | 23.46            | 2.19           | 23.57           |
| 35               | 2.78                  | 0.13             | 0.33          | 0.34            | 5.57             | 0.39           | 1.67              | 0.22            | 26.13           | 26.75            | 1.15           | 26.78           |
| 38               | -12.10                | 0.17             | 0.16          | 0.45            | 5.17             | 0.49           | 1.35              | 0.19            | 28.90           | 29.38            | 0.96           | 29.40           |
| 41               | -4.68                 | 0.17             | 0.21          | 0.52            | 4.80             | 0.53           | 1.62              | 0.16            | 31.82           | 32.20            | 1.45           | 32.23           |
| 44               | -7.28                 | 0.16             | 0.39          | 0.55            | 5.12             | 0.52           | 1.81              | 0.12            | 35.16           | 35.56            | 1.58           | 35.59           |
| 47               | -5.94                 | 0.15             | 0.44          | 0.55            | 7.72             | 0.45           | 1.33              | 0.11            | 38.57           | 39.35            | 1.22           | 39.36           |
| 50               | -12.05                | 0.18             | 0.41          | 0.50            | 14.01            | 0.38           | 1.03              | 0.13            | 42.74           | 44.98            | 0.89           | 44.99           |

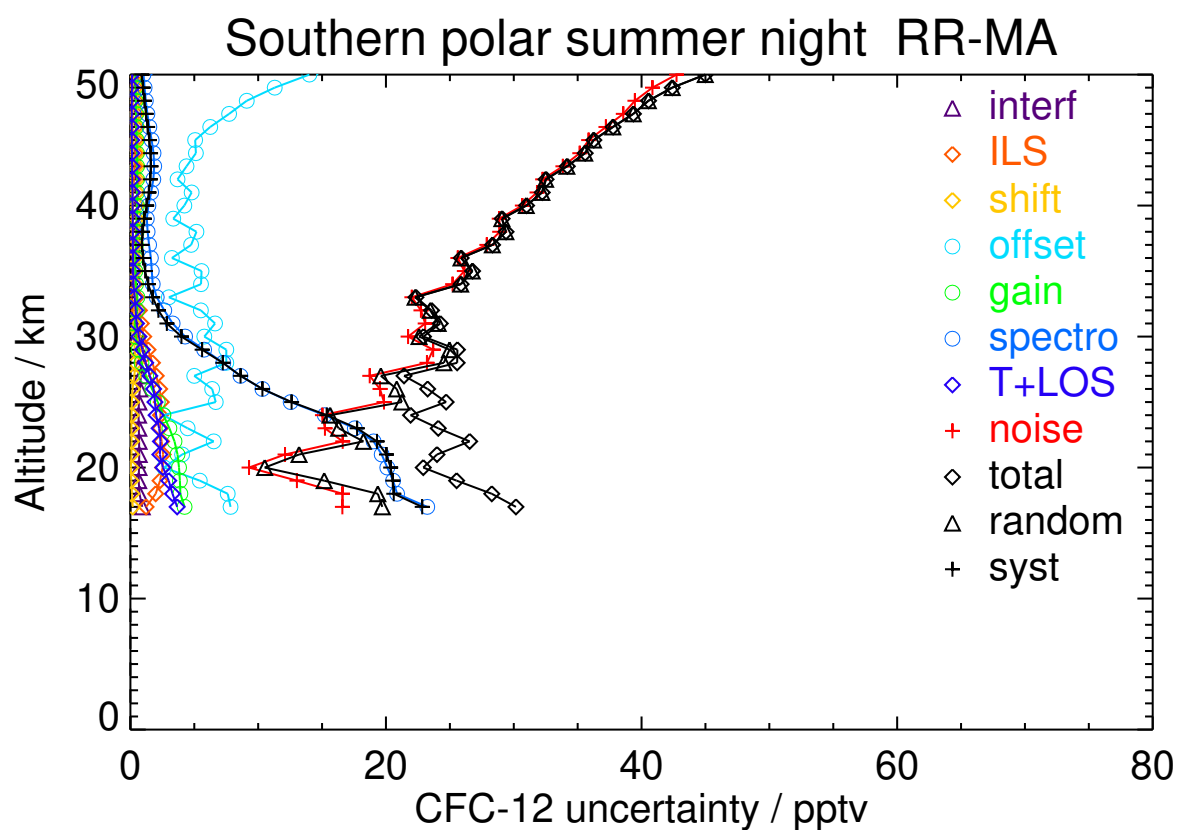

**Figure S100.** V8R\_F-12\_561 Southern polar summer night

**Table S102.** CFC-12 error budget for Southern polar autumn day. All uncertainties are  $1\sigma$ .

| altitude<br>(km) | mean target<br>(pptv) | interf<br>(pptv) | ILS<br>(pptv) | shift<br>(pptv) | offset<br>(pptv) | gain<br>(pptv) | spectro<br>(pptv) | T+LOS<br>(pptv) | noise<br>(pptv) | random<br>(pptv) | syst<br>(pptv) | total<br>(pptv) |
|------------------|-----------------------|------------------|---------------|-----------------|------------------|----------------|-------------------|-----------------|-----------------|------------------|----------------|-----------------|
| 20               | 263.80                | 0.51             | 3.02          | 0.20            | 2.63             | 3.48           | 20.73             | 3.05            | 10.78           | 12.49            | 20.68          | 24.16           |
| 23               | 151.20                | 0.50             | 2.65          | 0.10            | 5.94             | 2.36           | 17.01             | 2.69            | 19.43           | 20.84            | 16.97          | 26.87           |
| 26               | 74.36                 | 0.53             | 1.56          | 0.14            | 7.66             | 1.35           | 8.83              | 1.65            | 24.66           | 26.01            | 8.67           | 27.42           |
| 29               | 28.36                 | 0.46             | 0.91          | 0.19            | 8.48             | 0.61           | 4.61              | 0.63            | 29.41           | 30.71            | 4.06           | 30.98           |
| 32               | 0.38                  | 0.15             | 0.47          | 0.20            | 6.56             | 0.18           | 2.15              | 0.16            | 30.57           | 31.32            | 1.18           | 31.34           |
| 35               | 3.90                  | 0.09             | 0.30          | 0.32            | 5.17             | 0.21           | 1.60              | 0.08            | 33.74           | 34.17            | 0.85           | 34.18           |
| 38               | -2.42                 | 0.15             | 0.42          | 0.41            | 5.02             | 0.22           | 2.00              | 0.07            | 37.56           | 37.92            | 1.42           | 37.95           |
| 41               | -17.64                | 0.20             | 0.49          | 0.47            | 6.76             | 0.20           | 1.73              | 0.06            | 41.17           | 41.74            | 1.29           | 41.76           |
| 44               | -11.58                | 0.19             | 0.42          | 0.49            | 11.16            | 0.19           | 1.24              | 0.05            | 44.32           | 45.71            | 0.87           | 45.72           |
| 47               | -5.13                 | 0.18             | 0.32          | 0.47            | 19.03            | 0.21           | 1.23              | 0.07            | 48.63           | 52.24            | 0.80           | 52.24           |
| 50               | -2.00                 | 0.19             | 0.23          | 0.41            | 30.19            | 0.24           | 1.52              | 0.09            | 57.39           | 64.86            | 0.96           | 64.87           |

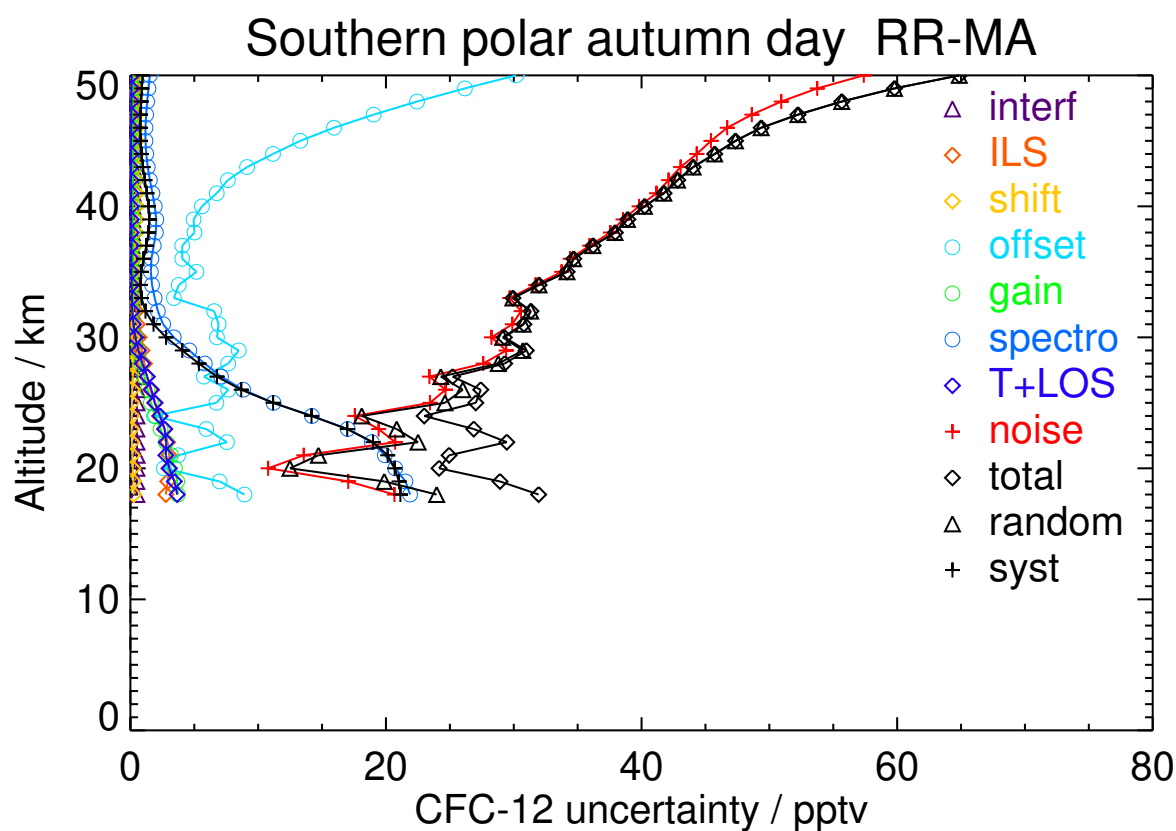

**Figure S101.** V8R\_F-12\_561 Southern polar autumn day

**Table S103.** CFC-12 error budget for Southern polar autumn night. All uncertainties are  $1\sigma$ .

| altitude<br>(km) | mean target<br>(pptv) | interf<br>(pptv) | ILS<br>(pptv) | shift<br>(pptv) | offset<br>(pptv) | gain<br>(pptv) | spectro<br>(pptv) | T+LOS<br>(pptv) | noise<br>(pptv) | random<br>(pptv) | syst<br>(pptv) | total<br>(pptv) |
|------------------|-----------------------|------------------|---------------|-----------------|------------------|----------------|-------------------|-----------------|-----------------|------------------|----------------|-----------------|
| 20               | 241.97                | 0.47             | 3.18          | 0.20            | 2.56             | 2.99           | 19.21             | 3.04            | 11.09           | 12.33            | 19.36          | 22.96           |
| 23               | 127.63                | 0.48             | 2.69          | 0.11            | 5.90             | 1.96           | 15.52             | 2.74            | 20.16           | 21.52            | 15.41          | 26.47           |
| 26               | 57.93                 | 0.51             | 1.36          | 0.13            | 7.50             | 0.83           | 7.40              | 1.69            | 25.17           | 26.53            | 6.83           | 27.39           |
| 29               | 26.16                 | 0.44             | 0.66          | 0.16            | 8.33             | 0.36           | 3.64              | 0.67            | 30.03           | 31.24            | 3.07           | 31.39           |
| 32               | 2.05                  | 0.15             | 0.48          | 0.18            | 6.59             | 0.14           | 2.13              | 0.16            | 31.43           | 32.16            | 1.20           | 32.19           |
| 35               | -6.51                 | 0.10             | 0.25          | 0.29            | 5.02             | 0.15           | 1.17              | 0.08            | 34.40           | 34.78            | 0.61           | 34.79           |
| 38               | -5.92                 | 0.15             | 0.30          | 0.37            | 5.25             | 0.19           | 1.26              | 0.07            | 38.27           | 38.64            | 0.78           | 38.65           |
| 41               | -2.99                 | 0.20             | 0.39          | 0.44            | 7.13             | 0.19           | 1.28              | 0.06            | 41.69           | 42.31            | 0.90           | 42.32           |
| 44               | -2.08                 | 0.19             | 0.39          | 0.48            | 11.81            | 0.20           | 1.13              | 0.05            | 44.91           | 46.45            | 0.85           | 46.45           |
| 47               | -7.76                 | 0.18             | 0.34          | 0.47            | 19.99            | 0.21           | 1.14              | 0.08            | 49.48           | 53.38            | 0.78           | 53.38           |
| 50               | -14.31                | 0.19             | 0.27          | 0.43            | 31.27            | 0.23           | 1.25              | 0.10            | 58.48           | 66.33            | 0.75           | 66.33           |

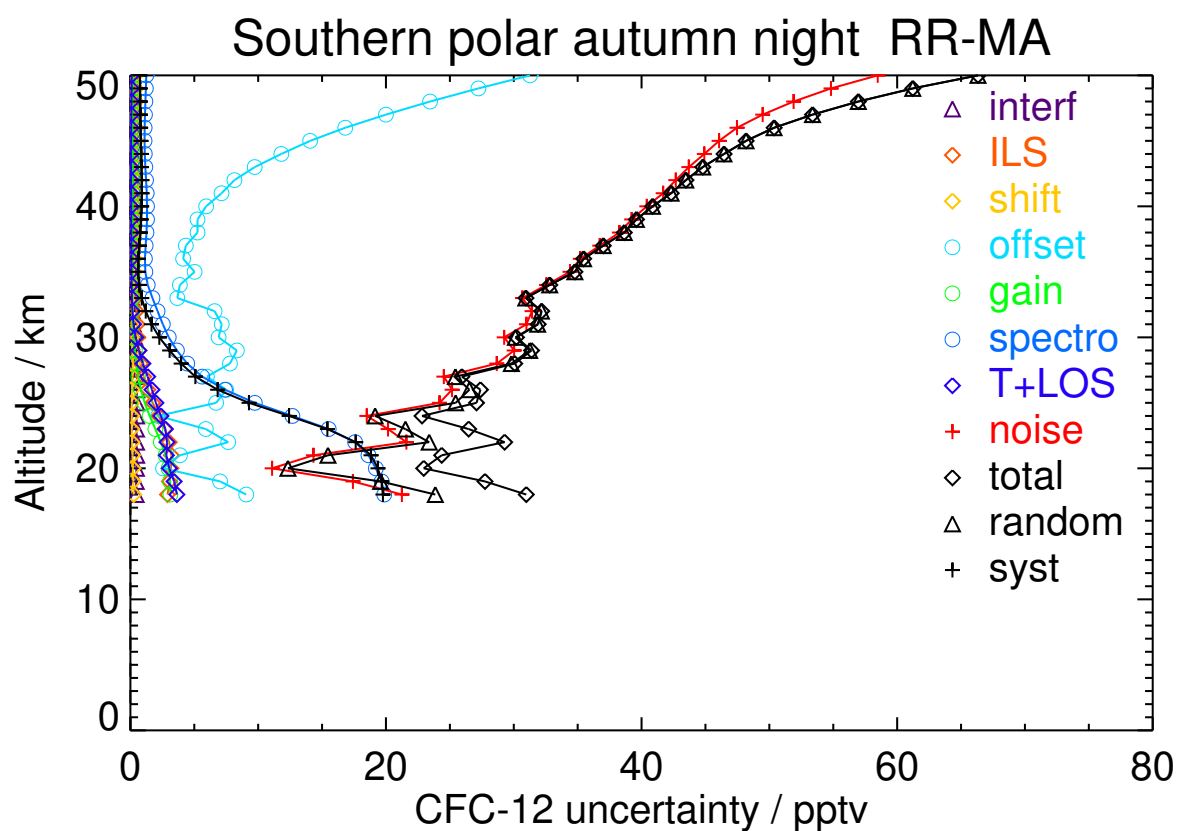

**Figure S102.** V8R\_F-12\_561 Southern polar autumn night
